# Supplementary material for: Investigation of Drosophila fruitless neurons that express Dpr/DIP cell adhesion molecules
Source: eLife. 2021 Feb 22;10:e63101. doi: 10.7554/eLife.63101 (PMC7972454; doi:10.7554/eLife.63101)
Supplement: Source data 1. — Data tables of quantification of fru P1 ∩ dpr/DIP neurons. This is an excel data table with 10 sheets that contain: 1. Raw Data Brain: raw data and observation notes only for areas of the brain scored/counted. 2. Raw Data VNC: raw data and observation notes for areas of the VNC scored/ counted. 3. Raw Scoring Data: raw scoring observations of areas in both brain and VNC scored. 4. Scoring Data Processed: assigning numerical values between 0 and 1 to scoring observations. 5. Raw Count Data: raw cell counts for areas in both the brain and VNC. 6. Cell Count Calculations: math done to cell counts so they were between 0 and 1. 7. Full Data Set: both male and female image analysis data with scoring observations and cell counts as values between 0 and 1. 8. Male Only: image analysis results for males (used to create heatmaps). 9. Female only: image analysis results for females (used to create heatmap). 10. Heatmap_Behavior_Plot: supplemental figure of the heatmap and behavior plot where the count data and scoring data has been separated. This sheet also contains additional heat maps of the male and female image count data. [file elife-63101-data1.xlsx]

## Sheet: Raw Data Brain
A key for columns D-J is provided in 'items scored' in Read_Me sheet, with definitions for abbreviations	Abbreviated genotype	Anterior Midbrain (cell body count)	mcAL (cell body count)	mAL neuron (present/ absent)	tritocerebral loop and/or SOG expression (present/ absent)	Lateral protocerebral complex features present/ absent (ring, arch, junction, crescent)	Antennal lobe glomeruli expression (present/ absent)	Mushroom body expression (present/ absent)	Comments	Internal Lab Notation: Blinded Image File name	Internal Lab Notation: Confocal Image File Name
	DIP alpha female brain 1	3	11	Absent	light loop present	none	Absent	Absent		K2	4d_female_DIPalpha_55810_fruflp_4_20180920
	DIP alpha female brain 2	8	13	Absent	loop absent	only short arch present	Absent	Absent		L2	4d_female_DIPalpha_55810_fruflp_1_20180917
	DIP alpha female brain 3	7	12	Absent	loop absent; U shaped neuron present	short arch only	Absent	Absent		P9	4d_female_DIPalpha_55810_fruflp_5_20180921
	DIP alpha female brain 4	9	8	Absent	loop absent	short arch	Absent	Absent		Q1	4d_female_DIPalpha_55810_fruflp_2_20180918
	DIP alpha female brain 5	5	11	Absent	loop present	short arch	Absent	Absent		Q9	4d_female_DIPalpha_55810_fruflp_3_20180919
	DIP alpha male brain 1	0	14	Absent	light loop present	none	Absent	Absent		K5	4d_male_DIPalpha_55810_fruflp_4_20180920
	DIP alpha male brain 2	0	15	Absent	loop absent	short arch	Absent	Absent		L7	4d_male_DIPalpha_55810_fruflp_1_20180917
	DIP alpha male brain 3	0	12	Absent	loop absent	none	Absent	Absent		M3	4d_male_DIPalpha_55810_fruflp_6_20180921
	DIP alpha male brain 4	0	14	Absent	loop absent	none	Absent	Absent		N2	4d_male_DIPalpha_55810_fruflp_3_20180919
	DIP alpha male brain 5	1	11	Absent	loop absent	none	Absent	Absent		N5	4d_male_DIPalpha_55810_fruflp_2_20180918
	DIP beta female brain 1	4	1	Absent	loop absent	short arch, ring, junction, crescent present	Absent	Absent	posterior neurons like J1, also like aSP-g (harder to tell here)	K7	4-7day_DIPBetagal4_fruFLP_uas_stop_mcd8gfp female5
	DIP beta female brain 2	13	18	Absent	loop absent; U shaped neuron present	thin rings, thick junction, thin arch, crescent absent	Absent	Absent	bright posterior neuron (like J1)	P0	4-7day_DIPBetagal4_fruFLP_uas_stop_mcd8gfp female1
	DIP beta female brain 3	3	20	Absent	loop absent	thin rings, thin junction, thin crescent, thin arch	Absent	Absent	aSP-K slice 34	Q2	4-7day_DIPBetagal4_fruFLP_uas_stop_mcd8gfp female2
	DIP beta female brain 4	9	7	Absent	loop absent	thin ring, thin junction, crescent absent, short arch	Absent	Absent	aSP-k right side slice 36	R0	4-7day_DIPBetagal4_fruFLP_uas_stop_mcd8gfp female3
	DIP beta female brain 5	9	16	Absent	loop absent	medium rings, junction present, thin crescent, long thin arch	Absent	Absent	aSP-g neurons slice 45 (right side), bright posterior neurons --bifurcates one axon goes to optic lobe one goes across brain	R9	4-7day_DIPBetagal4_fruFLP_uas_stop_mcd8gfp female4
	DIP beta male brain 1	6	10	Absent	loop present; sparse expression in SOG	thick rings, long thick arch, thick junction; crescent absent	Absent	Absent	large cell bodies between crepine. Compare area of ~31 in dors ant mid to ~69 here, bright posterior neurons --bifurcates one axon goes to optic lobe one goes across brain	J1	4-7day_DIPBetagal4_fruFLP_uas_stop_mcd8gfp male5
	DIP beta male brain 2	3	2	Absent	loop present	thick ring, thick junction, thin crescent, long arch	Absent	Absent		M2	4-7day_DIPBetagal4_fruFLP_uas_stop_mcd8gfp male2
	DIP beta male brain 3	3	4	Absent	loop absent; lots of expression in SOG	thick rings, thick junction, thin crescent, long arch	Absent	Absent		N0	4-7day_DIPBetagal4_fruFLP_uas_stop_mcd8gfp male1
	DIP beta male brain 4	6	10	Absent	very faint loop present; lots of expression	thick rings, thick junction, thin crescent, long arch	Absent	Absent	bright posterior neuron (like J1)	Q0	4-7day_DIPBetagal4_fruFLP_uas_stop_mcd8gfp male3
	DIP beta male brain 5	14	13	Absent	loop absent	thick rings, thick junction, thin crescent, long arch	Absent	Absent	bright posterior neuron (like J1)	R5	4-7day_DIPBetagal4_fruFLP_uas_stop_mcd8gfp male4
	DIP delta female brain 1	2	0	Absent	loop absent	none	Absent	Absent		K9	6d_female_DIPdelta_55810_fruflp_6_20180926
	DIP delta female brain 2	1	0	Absent	loop absent	none	Absent	Absent		L9	6d_female_DIPdelta_55810_fruflp_16_20180929
	DIP delta female brain 3	1	0	Absent	loop absent	none	Absent	Absent		P3	6d_female_DIPdelta_55810_fruflp_2_20180925
	DIP delta female brain 4	3	0	Absent	loop absent	none	Absent	Absent		P6	6d_female_DIPdelta_55810_fruflp_7_20180927
	DIP delta female brain 5	2	0	Absent	loop absent	none	Absent	Absent		P7	6d_female_DIPdelta_55810_fruflp_15_20180928
	DIP delta male brain 1	0	0	Absent	loop absent; no expression	none	Absent	Absent		J0	6d_male_DIPdelta_55810_fruflp_7_20180929
	DIP delta male brain 2	0	0	Absent	loop absent	none	Absent	Absent		L6	6d_male_DIPdelta_55810_fruflp_6_20180928
	DIP delta male brain 3	3	0	Absent	loop absent	none	Absent	Absent		M7	6d_male_DIPdelta_55810_fruflp_2_20180925
	DIP delta male brain 4	2	0	Absent	loop absent	none	Absent	Absent		M8	6d_male_DIPdelta_55810_fruflp_4_20180927
	DIP delta male brain 5	2	0	Absent	loop absent	none	Absent	Absent		P2	6d_male_DIPdelta_55810_fruflp_3_20180926
	DIP epsilon female brain 1	2	unscorable	Absent	loop absent	thin rings, short arch, thin junction; crescent absent	Absent	Absent		J3	4-7day_DIPEpsilongal4_fruFLP_uas_stop_mcd8gfp female3
	DIP epsilon female brain 2	4	11	Absent	loop absent	short arch, very thin rings, thin junction, thin crescent	Absent	Absent		K1	4-7day_DIPEpsilongal4_fruFLP_uas_stop_mcd8gfp female1
	DIP epsilon female brain 3	3	16	Absent	loop absent	short arch, very thin rings, thin junction, crescent absent	Absent	Absent		L4	4-7day_DIPEpsilongal4_fruFLP_uas_stop_mcd8gfp female5
	DIP epsilon female brain 4	2	10	Absent	loop absent	thin rings, thin junction, crescent absent, short arch	Absent	Absent		N8	4-7day_DIPEpsilongal4_fruFLP_uas_stop_mcd8gfp female2
	DIP epsilon female brain 5	1	15	Absent	loop absent	thin rings, thin junction, crescent absent, short arch	Absent	Absent		R4	4-7day_DIPEpsilongal4_fruFLP_uas_stop_mcd8gfp female4
	DIP epsilon male brain 1	1	11	Absent	loop absent	very thin rings, short arch, thin junction, thin crescent	DA1 present	Absent		K3	4-7day_DIPEpsilongal4_fruFLP_uas_stop_mcd8gfp male7
	DIP epsilon male brain 2	2	14	Absent	loop present	thick rings, thick junction, crescent present, long arch	Absent	Absent		L8	4-7day_DIPEpsilongal4_fruFLP_uas_stop_mcd8gfp male1
	DIP epsilon male brain 3	2	12	Absent	loop absent	short arch, very thin rings, thin junction, very thin crescent	Absent	Absent		M0	4-7day_DIPEpsilongal4_fruFLP_uas_stop_mcd8gfp male6
	DIP epsilon male brain 4	0	10	Absent	loop absent	thin rings, thick junction, long arch, thin crescent	Absent	Absent		M6	4-7day_DIPEpsilongal4_fruFLP_uas_stop_mcd8gfp male2
	DIP epsilon male brain 5	1	5	Absent	loop absent	thick rings, thick junction, thin crescent, long arch	Absent	Absent		N3	4-7day_DIPEpsilongal4_fruFLP_uas_stop_mcd8gfp male4
	DIP eta female brain 1	3	1	Absent	loop absent	thin rings, thin junction, thin crescent; short arch	DA1 and VA1v present	Absent		J9	4d_female_DIPeta_55810_fruflp_3_20180918
	DIP eta female brain 2	0	3	Absent	loop absent	only short arch present	DA1 and VA1v present	Absent	different posterior neurons (from J1) looks like aSP-g neurons -- no bifurcation	K4	4d_female_DIPeta_55810_fruflp_2_20180918
	DIP eta female brain 3	0	0	Present	loop absent	very thin rings, very thin junction, very thin crescent, thin arch	DA1 and VA1v present	Absent	aSP-k neurons both sides slice 53	M4	6d_female_DIPeta_55810_fruflp_5_20180918
	DIP eta female brain 4	7	0	Absent	loop absent	thin rings, thin junction, thin crescent, short arch	DA1 and VA1v present	Absent	aSP-k neurons both sides slice 52	N4	6d_female_DIPeta_55810_fruflp_4_20180918
	DIP eta female brain 5	5	1	Absent	loop absent	thin rings, thin junction, thin arch, crescent absent	DA1 and VA1v present	Absent	fan body	P1	4d_female_DIPeta_55810_fruflp_1_20190313
	DIP eta male brain 1	21	1	Absent	faint loop present	very thick rings, very thick junction, long arch, thick crescent	DA1 and VA1v present	Absent		J7	6d_male_DIPeta_55810_fruflp_3_20180918
	DIP eta male brain 2	19	2	Present	very faint loop present	long arch, thick ring, thick junction, thin crescent	DA1 and VA1v present	Absent	posterior neurons looks like aSP-K	K6	6d_male_DIPeta_55810_fruflp_1_20180918
	DIP eta male brain 3	12	0	Present	very faint loop present	thick rings, thick junction, long arch, crescent present	DA1 and VA1v present	Absent	aSP-K neurons left side slice 48	L1	6d_male_DIPeta_55810_fruflp_5_20180918
	DIP eta male brain 4	18	0	Present	loop present	thick rings, thick junction, thin crescent, long arch	DA1 and VA1v present	Absent	aSP-K neurons left side slice 48	N7	6d_male_DIPeta_55810_fruflp_2_20180918
	DIP eta male brain 5	14	0	Present	loop present	thick rings, thick junction, thin crescent, long arch	DA1 and VA1v present	Absent	aSP-k both sides slice 42	Q5	6d_male_DIPeta_55810_fruflp_4_20180918
	DIP gamma female brain 1	14	21	Absent	loop absent	thin arch, thin rings, thin junction, thin crescent	Absent	Present		J8	6d_female_DIPGamma_55810_fruflp_7_20180925
	DIP gamma female brain 2	8	12	Absent	loop absent	thin rings, thin arch, junction absent, crescent absent	Absent	Present		K0	6d_female_DIPGamma_55810_fruflp_3_20180925
	DIP gamma female brain 3	6	16	Absent	loop absent	thin rings, thin junction, thin crescent, short arch	Absent	Present		M5	6d_female_DIPGamma_55810_fruflp_4_20180925
	DIP gamma female brain 4	0	15	Absent	loop absent	thin rings, thin junction, thin crescent, short arch	Absent	Present		N6	6d_female_DIPGamma_55810_fruflp_5_20180925
	DIP gamma female brain 5	5	15	Absent	loop absent	thin ring, thin junction, thin crescent, short arch	Absent	Present	aSP-K slice 35	Q3	6d_female_DIPGamma_55810_fruflp_6_20180925
	DIP gamma male brain 1	5	25	Absent	loop present; sparse expression in SOG	thick rings, long arch, thick junction, crescent present	Absent	Present		J5	6d_male_DIPGamma_55810_fruflp_4_20180918
	DIP gamma male brain 2	15	17	Absent	loop present	long arch, thick rings, thick junction, crescent present	Absent	Present		P8	6d_male_DIPGamma_55810_fruflp_5_20180918
	DIP gamma male brain 3	24	20	Present	loop present	thick rings, thick junction, thin crescent, long arch	Absent	Present	aSP-k both sides slice 44	Q6	6d_male_DIPGamma_55810_fruflp_8_20180918
	DIP gamma male brain 4	32	20	Absent	loop present	thin rings, thick junction, no crescent, long arch	Absent	Present		R6	6d_male_DIPGamma_55810_fruflp_2_20180918
	DIP gamma male brain 5	15	16	Absent	loop present	thick rings, thick junction, thin crescent, long arch	Absent	Present	aSP-k neurons slice 38	R8	6d_male_DIPGamma_55810_fruflp_7_20180918
	DIP theta female brain 1	16	14	Absent	loop absent	thin arch; thin rings, thick junction, thin crescent	DA1 present VA1v absent	Absent	PN-right antennal lobe	J2	4-7day_DIPThetagal4_fruFLP_uas_stop_mcd8gfp female3
	DIP theta female brain 2	7	12	Absent	loop absent	thin rings, thin junction, short arch, faint crescent	DA1 present VA1v absent	Absent	posterior neurons but can't tell what type	L5	4-7day_DIPThetagal4_fruFLP_uas_stop_mcd8gfp female4
	DIP theta female brain 3	16	11	Absent	loop absent	ring present, thick junction, thin crescent, thin arch	DA1 present VA1v absent	Absent		M1	4-7day_DIPThetagal4_fruFLP_uas_stop_mcd8gfp female2
	DIP theta female brain 4	20	12	present, faint	loop absent	thin rings, thick junction, thin crescent, short arch	DA1 present VA1v absent	Absent	aSP-g bifurcation, long on left side slice 31	N9	4-7day_DIPThetagal4_fruFLP_uas_stop_mcd8gfp female1
	DIP theta female brain 5	4	11	Absent	loop absent; lots of expression in SOG	thin rings, junction present, crescent present, thin arch	DA1 present VA1v absent	Absent		P4	4-7day_DIPThetagal4_fruFLP_uas_stop_mcd8gfp female5
	DIP theta male brain 1	0	unscorable	Present	loop present	long arch, thick rings, thick junction, crescent present	Absent	Absent		K8	4-7day_DIPThetagal4_fruFLP_uas_stop_mcd8gfp male4
	DIP theta male brain 2	10	8	Present	very bright loop present	thick rings, thick junction, thick crescent, long arch	Absent	Absent	aSP-K neurons both sides slice 38	L3	4-7day_DIPThetagal4_fruFLP_uas_stop_mcd8gfp male3
	DIP theta male brain 3	7	14	Present	loop present	long arch, thick rings, thick junction, thick crescent	Absent	Absent	aSP-K slice 38	P5	4-7day_DIPThetagal4_fruFLP_uas_stop_mcd8gfp male2
	DIP theta male brain 4	6	11	Present	loop present	thick rings, thick junction, crescent present, long arch	Absent	Absent		Q7	4-7day_DIPThetagal4_fruFLP_uas_stop_mcd8gfp male1
	DIP theta male brain 5	10	16	Present	loop present	thick ring, thick junction, thick crescent, long thick arch	Absent	Absent		R3	4-7day_DIPThetagal4_fruFLP_uas_stop_mcd8gfp male7
	DIP zeta female brain 1	7	12	Absent	very faint loop present	thin arch, thin rings, junction and crescent present	DA1 present VA1v absent	Absent	aSP-g bifurcation? Slice 43 right side	L0	4-7day_DIPZetagal4_fruFLP_uas_stop_mcd8gfp female6
	DIP zeta female brain 2	3	4	Absent	loop absent	thin rings, thick junction, thin crescent, short arch	Absent	Absent	interesting neuron slice 32 right side--can't identify	M9	4-7day_DIPZetagal4_fruFLP_uas_stop_mcd8gfp female1
	DIP zeta female brain 3	3	6	Absent	loop absent	thin rings, thin junction, thin crescent, short arch	Absent	Absent		N1	4-7day_DIPZetagal4_fruFLP_uas_stop_mcd8gfp female2
	DIP zeta female brain 4	3	8	Absent	loop absent	thin ring, thin junction, no crescent, thin arch	Absent	Absent	aSP-h right side slice 41	Q4	4-7day_DIPZetagal4_fruFLP_uas_stop_mcd8gfp female4
	DIP zeta female brain 5	4	6	Absent	loop absent	thin ring, thin junction, no cresent,long arch	Absent	Absent	bright posterior neuron (like J1)	R1	4-7day_DIPZetagal4_fruFLP_uas_stop_mcd8gfp female3
	DIP zeta male brain 1	4	unscorable	Absent	faint loop present	thick rings, long arch, thick junction, crescent absent	Absent	Absent	bright posterior neuron (like J1)	J4	4-7day_DIPZetagal4_fruFLP_uas_stop_mcd8gfp male2
	DIP zeta male brain 2	1	2	Absent	loop present	thick rings, junction absent; N/A for arch and junction bc tissue cut	Absent	Absent		J6	4-7day_DIPZetagal4_fruFLP_uas_stop_mcd8gfp male4
	DIP zeta male brain 3	4	2	Present	loop present	thin ring, thick junction, crescent absent, long arch	Absent	Absent	bright posterior neuron (like J1)	Q8	4-7day_DIPZetagal4_fruFLP_uas_stop_mcd8gfp male1
	DIP zeta male brain 4	3	unscorable	Absent	loop absent	thin ring, thin junction, thin crescent, short arch	Absent	Absent		R2	4-7day_DIPZetagal4_fruFLP_uas_stop_mcd8gfp male3
	DIP zeta male brain 5	5	5	Absent	loop present	thick rings, thick junction, no crescent, long arch	Absent	Absent		R7	4-7day_DIPZetagal4_fruFLP_uas_stop_mcd8gfp male5
	dpr 1 female brain 1	26	26	Absent	loop absent; sparse expression	thin arch, thin rings, thin junction, thin crescent	Present in both DA1 (intense) and both VA1vs	Absent		I7	4-7day_dpr1gal4_fruFLP_uas_stop_mcd8gfp female
	dpr 1 female brain 2	17	31	Absent	loop absent	short arch, thin rings, thin junction, crescent absent	Present in both DA1 and both VA1vs	Absent	missing right eye lobe	J9	4-7day_dpr1gal4_fruFLP_uas_stop_mcd8gfp female 2
	dpr 1 female brain 3	7	3	Absent	very very light loop; lots of expression	short arch, thin rings, junction and crescent present	Present in both DA1 and both VA1vs	Absent		F2	4-7day_dpr1gal4_fruFLP_uas_stop_mcd8gfp female 3
	dpr 1 female brain 4	11	26	Absent	loop absent	short arch, thin rings, thin junction, thin crescent	Present in both DA1 and both VA1vs	Absent		K8	4-7day_dpr1gal4_fruFLP_uas_stop_mcd8gfp female 4
	dpr 1 female brain 5	18	22	Absent	loop absent; sparse expression	short arch, ring, junction, crescent present	Present in both DA1 and both VA1vs	Absent		H6	4-7day_dpr1gal4_fruFLP_uas_stop_mcd8gfp female 5
	dpr 1 male brain 1	22	34	Absent	loop present	long arch, thick rings, thick junction, thin crescent	Present in both DA1 and both VA1vs	Absent		K1	4-7day_dpr1gal4_fruFLP_uas_stop_mcd8gfp male
	dpr 1 male brain 2	unscorable	unscorable	Absent	loop present	long arch, thick rings, thick junction, crescent present	Present in both DA1 and both VA1vs	Absent	Poor image quality	K7	4-7day_dpr1gal4_fruFLP_uas_stop_mcd8gfp male 2
	dpr 1 male brain 3	image quality too poor to count	image quality too poor to count	Absent	sparse expression; loop present	thin arch, thick rings, thick junction, crescent present	Present in both DA1 and both VA1vs	Absent		D2	4-7day_dpr1gal4_fruFLP_uas_stop_mcd8gfp male 3
	dpr 1 male brain 4	20	37	Absent	sparse expression, loop present	all present; extended arch	Present in both DA1 and both VA1vs	Absent		B1	4-7day_dpr1gal4_fruFLP_uas_stop_mcd8gfp male 4
	dpr 1 male brain 5	27	32	Absent	loop present	long, bright arch, thick rings, thick junction, thin crescent	Present in both DA1 (intense) and both VA1vs	Absent		O2	4-7day_dpr1gal4_fruFLP_uas_stop_mcd8gfp male 5
	dpr 2 female brain 1	19	37	Present, there is lots of cell bodies above the glomeruli that can contribute to the projects that cross the brain and move down into the loop	Found the loop to be present when scrolling through the stack, it is very faint/absent in the 3D image SOG does not have a lot of expression	Yes, all the junction is very bright and congested compared to the other parts and the arch expression fade, tapers toward the junction	Present in both DA1 and both VA1vs	Absent		BS_A3	4-7day_dpr2gal4_fruFLP_uas_stop_mcd8gfp female 2
	dpr 2 female brain 2	11	9	Absent	No, the loop is there (coming down from the median bundle) but don't see it become full circle though there is branching present in the SOG	Yes, all are present expression is brighter on the right side of the brain compared to the left which is very faint (confocal)	Present in both DA1 and both VA1vs	Absent		BS_D5	4-7day_dpr2gal4_fruFLP_uas_stop_mcd8gfp female 5
	dpr 2 female brain 3	24	23	Absent	Loop is present but very faint and only seen when scrolling through the stacks and not in the 3D projection	Yes, all are present though the arch is thin (female-like)	Present in both DA1 and both VA1vs	Absent		BS_E1	4-7day_dpr2gal4_fruFLP_uas_stop_mcd8gfp female 4
	dpr 2 female brain 4	22	25	Absent	Absent	All parts of the complex are present but more faint in expression compared to the glomeruli and the arch is think in expression(female-like)	Present in both DA1 and both VA1vs	Absent		BS_Q4	4-7day_dpr2gal4_fruFLP_uas_stop_mcd8gfp female 3
	dpr 2 female brain 5	18	32	Present	Loop is present and there is branching in the SOG	All parts of the complex are present but the arch thins as it moves toward the junction (female-like)the arch is very bright in expression like the glomeruli but the ring is more faint but very much visible and is complete with the crescent	Present in both DA1 and both VA1vs	Absent		BS_S7	4-7day_dpr2gal4_fruFLP_uas_stop_mcd8gfp female
	dpr 2 male brain 1	29	33	Absent, while there are many cell bodies present above the glomeruli I don't believe any of them contribute to the ring in the SOG like mAL expression is shown to do	The loop is present but faint however, there are many cell bodies in the SOG area of the brain	Yes, all the parts are present the arch tapers down into the junction so the expression fades, the junction is very bright compared to the rest of the ring	Present in both DA1 and both VA1vs	Absent		BS_A5	4-7day_dpr2gal4_fruFLP_uas_stop_mcd8gfp male 6
	dpr 2 male brain 2	35	45	Absent	Loop is present and only visible in the stacks (not the 3D projection) because as the expression from the median bundle project downward the expression gets more faint so once the circle meets to complex it can hardly be seen	Yes, all parts of the complex are present The arch is thick (male-like)	Present in both DA1 and both VA1vs	Absent		BS_F1	4-7day_dpr2gal4_fruFLP_uas_stop_mcd8gfp male 2
	dpr 2 male brain 3	27	34	Present	Loop is present	All parts of the complex are present, the arch, junction, and ring are thicker in expression all parts are even in expression levels which is bright	Present in both DA1 and both VA1vs	Absent		BS_O8	4-7day_dpr2gal4_fruFLP_uas_stop_mcd8gfp male 5
	dpr 2 male brain 4	41	50	Absent	Loop is present	All parts of the complex are present and thick and bright in expression	Present in both DA1 and both VA1vs	Absent		BS_P4	4-7day_dpr2gal4_fruFLP_uas_stop_mcd8gfp male 3
	dpr 2 male brain 5	0	45	Absent	Loop is present	Yes, the all the parts of the complex are present the arch is thick in expression (male-like)	Present in both DA1 and both VA1vs	Absent		BS_Q6	4-7day_dpr2gal4_fruFLP_uas_stop_mcd8gfp male
	dpr 3 female brain 1	23	21	Absent	loop absent; 2 large cell bodies at bottom of SOG	short arch, thin rings, junction, crescent present	Present in both DA1 and both VA1vs	Absent		H2	4-7day_dpr3gal4_fruFLP_uas_stop_mcd8gfp female
	dpr 3 female brain 2	15	20	Absent	loop absent	short arch, thin rings, thick junction, crescent present	Present in both DA1 and both VA1vs	Absent		I8	4-7day_dpr3gal4_fruFLP_uas_stop_mcd8gfp female 2
	dpr 3 female brain 3	unscorable	unscorable	Absent	loop absent	short arch, thin rings, thin junction, thin crescent	Present in both DA1 and both VA1vs	Absent	Poor image quality	L8	4-7day_dpr3gal4_fruFLP_uas_stop_mcd8gfp female 3
	dpr 3 female brain 4	22	19	Absent	loop absent; sparse expression	short arch, thin rings, thin junction, thin crescent	Present in both DA1 and both VA1vs	Absent		N3	4-7day_dpr3gal4_fruFLP_uas_stop_mcd8gfp female 4
	dpr 3 female brain 5	22	22	Absent	sparse expression; loop absent	thin arch, ring present, junction and crescent absent	Present in both DA1 and both VA1vs	Absent		D5	4-7day_dpr3gal4_fruFLP_uas_stop_mcd8gfp female 5
	dpr 3 male brain 1	6	13	Absent	very very light loop	long arch, thick rings, thick junction, long crescent	Present in both DA1 and both VA1vs	Absent		D9	4-7day_dpr3gal4_fruFLP_uas_stop_mcd8gfp male
	dpr 3 male brain 2	13	21	Absent	very faint loop present; not much expression	long thick arch, thick rings, thick junction, crescent present	Absent	Absent		R1	4-7day_dpr3gal4_fruFLP_uas_stop_mcd8gfp male 2
	dpr 3 male brain 3	unscorable	16	Absent	loop present	arch unscorable; ring, crescent, junction present	Absent	Absent	Poor image quality	G8	4-7day_dpr3gal4_fruFLP_uas_stop_mcd8gfp male 3
	dpr 3 male brain 4	17	24	Absent	very faint loop present	long arch, all present	Absent	Absent		E9	4-7day_dpr3gal4_fruFLP_uas_stop_mcd8gfp male 4
	dpr 3 male brain 5	8	14	Absent	loop absent; lots of expression in SOG	long arch, thin rings, thick junction, thin crescent	Absent	Absent		N7	4-7day_dpr3gal4_fruFLP_uas_stop_mcd8gfp male 5
	dpr 4 female brain 1	17	16	Absent	Loop is very faint branching is present in the SOG	The arch of the complex is present but it is hard to see if the ring or crescent are present because all the expression in the middle of the brain are very faint and there is a lot of background in this brain image	Present in both DA1 and both VA1vs	Present		BS_M7	4-7daysDpr4GAL4_UASstopsmGDPmycstop_FruFLP female
	dpr 4 female brain 2	8	6	Absent	There is no loop but there is faint expression/branching in the SOG	No, the arch is present but the junction and crescent is missing and the ring isn't complete there also seems to be a "ring" in the brain that is too high to be the ring of the lateral protocerebral complex	Present in both DA1 and both VA1vs	Yes present but not dense in expression		BS_B3	4-7daysDpr4GAL4_UASstopsmGDPmycstop_FruFLP female 5
	dpr 4 female brain 3	8	23	Absent	I don't believe the loop is present the expression from the median bundle neurons definitely project downwards into the SOG but I don't think it creates the loop but it does(?) contribute to the SOG expression which is branching in the bottom of the brain	Yes, all the parts of the complex are present but all are very faint in expression	Present in both DA1 and both VA1vs	Yes, the expression is present but not as dense as other dpr lines		BS_B7	4-7daysDpr4GAL4_UASstopsmGDPmycstop_FruFLP female 2
	dpr 4 female brain 4	13	17	Absent	there is a very small loop from the median bundle neurons but it is very faint and not very low in the SOG in the 3D projection there is visible branching in the SOG at the bottom	No, the arch is present but faint in expression (female-like) there is an additional ring above where the typical ring is and the ring is very faint hard to see and does not have the crescent	Present in both DA1 and both VA1vs	Yes, present but not dense		BS_C5	4-7daysDpr4GAL4_UASstopsmGDPmycstop_FruFLP female 4
	dpr 4 female brain 5	13	19	Absent	Loop is present and there is additional branching in the SOG	Yes, all parts of the complex are present HOWEVER, the ring is very faint and there is an additional "ring" on top of the ring that is the ring of the complex	Present in both DA1 and both VA1vs	Present		BS_H5	4-7daysDpr4GAL4_UASstopsmGDPmycstop_FruFLP female 3
	dpr 4 male brain 1	15	9	Absent	The loop is present	Yes, all the parts of the complex are present the arch is the brightest (thick-male like) and into the junction is bright but the ring and crescent are more faint in comparison and the crescent expression seems elongated	Absent	Present		BS_C2	4-7daysDpr4GAL4_UASstopsmGDPmycstop_FruFLP male 6
	dpr 4 male brain 2	10	16	Absent	Loop is present in the SOG	Yes, all the features of the complex are present the arch is thick (male-like) and the junction is the brightest the ring and crescent are fainter in expression(in comparison)	Present in both DA1 and both VA1vs	Present		BS_F7	4-7daysDpr4GAL4_UASstopsmGDPmycstop_FruFLP male
	dpr 4 male brain 3	19	19	Present	Loop is present and thick and bright in expression	All parts of the complex are present and thick and bright in expression (male-like)	Present in both DA1 and both VA1vs	Present		BS_M9	4-7daysDpr4GAL4_UASstopsmGDPmycstop_FruFLP male 3
	dpr 4 male brain 4	11	22	Present	Loop is present in the SOG along with some branching	All the parts of the complex are present but faint in expression compared to the mushroom body	Present in both DA1 and both VA1vs	Present		BS_N7	4-7daysDpr4GAL4_UASstopsmGDPmycstop_FruFLP male 4
	dpr 4 male brain 5	7	29	Absent	Loop is present	all the parts of the complex are present the arch tapers down into the junction (female-like) the ring and crescent are fainter in expression compared to the mushroom body expression the arch and junction	DA1 present on one side	Present		BS_R4	4-7daysDpr4GAL4_UASstopsmGDPmycstop_FruFLP male 5
	dpr 5 female brain 1	24	17	Absent	Loop is present but very faint in both the stacks and the 3D projection	Yes, Present but very faint	DA1 present VA1v absent	Present		BS_E4	6d_female_dpr5_55810_fruflp_3_20180919
	dpr 5 female brain 2	17	20	Absent	Loop present but very faint	All parts are present HOWEVER all but the junction is very very faint	DA1 present VA1v absent	Present		BS_H7	6d_female_dpr5_55810_fruflp_6_20180919
	dpr 5 female brain 3	21	28	Absent	No loop is present some branching in the SOG but also there is a cut in the brain in the SOG separating it	Yes, all present all faint but the junction	DA1 present VA1v absent	Present		BS_K3	6d_female_dpr5_55810_fruflp_4_20180919
	dpr 5 female brain 4	12	18	Absent	Absent	Not all the parts of the complex are present, the arch is seen faintly tapering towards the junction which is bright but it is hard to see a completed ring or crescent	DA1 present VA1v absent	Present		BS_Q8	6d_female_dpr5_55810_fruflp_5_20180919
	dpr 5 female brain 5	11	5	Absent	Loop is absent	All the parts of the complex are present but the arch and ring are very thin in expression (female-like) also very faint in expression level compared to the mushroom body	DA1 present VA1v absent	Present		BS_R8	6d_female_dpr5_55810_fruflp_7.1_20180919
	dpr 5 male brain 1	23	21	Absent	Yes loop is present	Yes, all though the expression is more faint	DA1 present VA1v absent	Present		BS_C9	6d_male_dpr5_55810_fruflp_5_20180919
	dpr 5 male brain 2	11	30	Absent	Loop is present	Yes, Present but very faint	DA1 present VA1v absent	Present		BS_E5	6d_male_dpr5_55810_fruflp_4_20180919
	dpr 5 male brain 3	8	9	Absent	Loop is absent	Yes, all present/faint	DA1 present VA1v absent	Present		BS_J2	6d_male_dpr5_55810_fruflp_1_20180919
	dpr 5 male brain 4	23	30	Present	Loop present	Yes, all present but very faint	DA1 present VA1v absent	Present		BS_J8	6d_male_dpr5_55810_fruflp_2_20180919
	dpr 5 male brain 5	20	18	Absent	Loop is present in the SOG but faint in expression similar to how the complex was faint in expression compared to the mushroom body where it is hard to make out the completed circle	All the parts of the complex are present (male-like) but the expression is very faint compared to the mushroom body expression	DA1 present VA1v absent	Present		BS_N4	6d_male_dpr5_55810_fruflp_3_20180919
	dpr 6 female brain 1	18	11	Absent	Loop is present	Yes, all the parts of the complex are present arch tapers down into the junction (female-like?)	Absent	Absent		BS_D2	4-7day_dpr6gal4_fruFLP_uas_stop_mcd8gfp female 4
	dpr 6 female brain 2	20	14	Absent	Loop is present but very faint and only seen when scrolling through the stacks and not in the 3D projection, there is branching in the SOG	Yes, all are present though the arch is thin (female-like)	Absent	Absent		BS_E2	4-7day_dpr6gal4_fruFLP_uas_stop_mcd8gfp female 3
	dpr 6 female brain 3	4	4	Absent	Loop present but very faint	Yes, all present(female-like)	Absent	Absent		BS_H8	4-7day_dpr6gal4_fruFLP_uas_stop_mcd8gfp female 5
	dpr 6 female brain 4	15	13	Absent	A small loop is present in the SOG connecting the midline expression together mostly branching expression is visible in the SOG	Yes, all parts of the complex are present the arch expression thins in expression as it tapers down towards the junction	Absent	Absent		BS_N9	4-7day_dpr6gal4_fruFLP_uas_stop_mcd8gfp female
	dpr 6 female brain 5	7	14	Absent	Loop is present but very faint in expression there is also branching in the SOG	Thick arch expression (male-like) as it moves toward the junction which is larger in surface area. The ring and crescent are present but the crescent extends further down the brain than typical. All parts of the same expression level (brightness)	Absent	Absent		BS_T3	4-7day_dpr6gal4_fruFLP_uas_stop_mcd8gfp female 2
	dpr 6 male brain 1	27	27	unscorable	Present	Yes all are present the arch is very thick (male-like) the junction is very bright and the ring is very thick and bright the most dense complex we have seen	Absent	Absent		BS_F5	4-7day_dpr6gal4_fruFLP_uas_stop_mcd8gfp male 5
	dpr 6 male brain 2	39	18	Present	Loop is present	Yes, all the features of the complex are present the arch is thick (male-like) and the junction is the brightest the ring and crescent are fainter in expression(in comparison)	Absent	Absent		BS_F9	4-7day_dpr6gal4_fruFLP_uas_stop_mcd8gfp male 3
	dpr 6 male brain 3	32	27	Present	Loop is present	All the parts of the complex are present the junction has the brightest expression pattern compared to the rest of the complex the complex expression is thick (male-like)	Absent	Absent		BS_R3	4-7day_dpr6gal4_fruFLP_uas_stop_mcd8gfp male 4
	dpr 6 male brain 4	34	22	Present	Loop is present	All the parts of the complex are present(male-like) the arch is thick in expression as it moves to the junction which is bright in expression (similar to the arch but brighter than the ring and crescent)	Absent	Absent		BS_R6	4-7day_dpr6gal4_fruFLP_uas_stop_mcd8gfp male 7
	dpr 6 male brain 5	32	25	Present	Present	All parts of the complex are present the arch is thick in expression as it moves to the junction and the ring and crescent which are all bright and thick in expression	Absent	Absent		BS_S4	4-7day_dpr6gal4_fruFLP_uas_stop_mcd8gfp male 2
	dpr 8 female brain 1	21	33	Absent	loop absent	short arch, thin rings, thin junction, thin crescent	Present in both DA1 and both VA1vs	Present		K9	4-7day_dpr8gal4_fruFLP_uas_stop_mcd8gfp female
	dpr 8 female brain 2	22	32	Absent	loop absent; lots of expression and large cell body at bottom	thin rings, thin arch, junction present, crescent absent	Present in both DA1 and both VA1vs	Present		P2	4-7day_dpr8gal4_fruFLP_uas_stop_mcd8gfp female 2
	dpr 8 female brain 3	14	13	Absent	loop absent; not much expression	short arch, thin rings, thin junction, crescent absent	Present in both DA1 and both VA1vs	Present		Q9	4-7day_dpr8gal4_fruFLP_uas_stop_mcd8gfp female 3
	dpr 8 female brain 4	9	14	Absent	loop absent	short arch, ring, junction, crescent present	Present in both DA1 and both VA1vs	Present		B2	4-7day_dpr8gal4_fruFLP_uas_stop_mcd8gfp female 4
	dpr 8 female brain 5	10	19	Absent	loop absent	all present but thin and light; arch very thin and short	Present in both DA1 and both VA1vs	Present		B4	4-7day_dpr8gal4_fruFLP_uas_stop_mcd8gfp female 5
	dpr 8 male brain 1	6	17	Absent	loop present	all present; extended arch	Absent	Present		B3	4-7day_dpr8gal4_fruFLP_uas_stop_mcd8gfp male
	dpr 8 male brain 2	21	16	Absent	loop present	long arch, thick ring, thick junction, crescent	Absent	Present		D7	4-7day_dpr8gal4_fruFLP_uas_stop_mcd8gfp male 2
	dpr 8 male brain 3	12	19	Absent	loop present	long arch, ring present, thick junction, crescent present	Absent	Present		M8	4-7day_dpr8gal4_fruFLP_uas_stop_mcd8gfp male 3
	dpr 8 male brain 4	9	14	Present	loop present	all present; long arch, thick junction	Absent	Present		D6	4-7day_dpr8gal4_fruFLP_uas_stop_mcd8gfp male 4
	dpr 8 male brain 5	16	18	Absent	loop present	thin arch, thin rings, junction present, very thin crescent	DA1 present VA1v absent	Present		H8	4-7day_dpr8gal4_fruFLP_uas_stop_mcd8gfp male 5
	dpr 9 female brain 1	29	34	Absent, there are no cell bodies above the glomeruli to contribute to the crossing over or the loop which also seem absent or faint	The loop is no obviously present when looking at the 3D projection when looking through the stacks it is very very faint but it can see seen in the SOG, a circle coming from the median bundle neurons	Yes, all the parts of the complex are present. The arch is think in expression as it tapers down to the junction which is brighter and slightly more dense(organized) on the right side compared to the left	Present in both DA1 and both VA1vs	Present		BS_A8	4-7day_dpr9gal4_fruFLP_uas_stop_mcd8gfp female 3
	dpr 9 female brain 2	25	36	Absent	Absent	Yes, all arch is thin	Present in both DA1 and both VA1vs	Present		BS_F3	4-7day_dpr9gal4_fruFLP_uas_stop_mcd8gfp female 5
	dpr 9 female brain 3	29	31	Absent	Very faint loop mostly made of branching in the SOG	Yes, all parts present looks male like in the 3D (thick) but female like in the stacks (thins)	Present in both DA1 and both VA1vs	Present		BS_K6	4-7day_dpr9gal4_fruFLP_uas_stop_mcd8gfp female 4
	dpr 9 female brain 4	21	43	Absent	Very faint can only be seen in the stacks	Yes all parts of the complex are present there is a cut in the top left side of the brain so it is hard to draw conclusions about the arch but all are present	Present in both DA1 and both VA1vs	Present		BS_R1	4-7day_dpr9gal4_fruFLP_uas_stop_mcd8gfp female 2
	dpr 9 female brain 5	26	27	Absent	The loop is very faint in expression so it is only seen in the stacks when scrolling through not in the 3D image	Yes, all the parts of the complex are present the arch tapers down in expression as it gets to the junction very female like the junction is very bright in expression and very large, in the 3D image and when scrolling through the stacks there looks like there is a "ring" present above the ring of the lateral protocerebral complex which is present so the top part of that ring of the complex is ver…	DA1 present VA1v absent	Absent		BS_B5	4-7day_dpr9gal4_fruFLP_uas_stop_mcd8gfp female
	dpr 9 male brain 1	17	12	Yes, there are cell bodies above the glomeruli that contribute to the loop in the SOG and there is expression going cross up the brain on the other side	the loop is present and very thick and bright in expression it can easily be found when looking through the stacks or at the 3D projection	Yes, all the parts are present the junction is very bright in this brain as the expression comes down from the arch and into the ring the arch is thicker on one side of the brain as it tapers down to the junction which is male like though the other side thins, tapers down	Present in both DA1 and both VA1vs	Absent		BS_B4	4-7day_dpr9gal4_fruFLP_uas_stop_mcd8gfp male 3
	dpr 9 male brain 2	22	9	Present	Yes	Yes, all the complex is present very bright in expression	DA1 present VA1v absent	No, Really faint branching present		BS_D6	4-7day_dpr9gal4_fruFLP_uas_stop_mcd8gfp male 2
	dpr 9 male brain 3	42	43	Present	Present	Yes, all present (male-like)	Present in both DA1 and both VA1vs	Present		BS_G6	4-7day_dpr9gal4_fruFLP_uas_stop_mcd8gfp male 4
	dpr 9 male brain 4	26	39	Absent	Present	All the parts of the complex are present the arch is thick in expression (male-like) the ring and crescent are present the expression level is more faint compared to the mushroom body but very much visible still	DA1 present VA1v absent	Present		BS_S5	4-7day_dpr9gal4_fruFLP_uas_stop_mcd8gfp male 7
	dpr 9 male brain 5	31	23	Absent	Present	The arch is very thick in expression as it moves down towards the junction (male-like) the junction is also large in expression (both the arch and the junction are faint in expression compared tot he mushroom body but very much visible) but the ring and crescent are very faint in expression where its hard to see if the ring completes and if the crescent is present	DA1 present VA1v absent	Present		BS_S6	4-7day_dpr9gal4_fruFLP_uas_stop_mcd8gfp male 8
	dpr 10 female brain 1	13	14	Absent	loop absent; sparse expression	thin arch, thin rings, thick junction, no crescent	DA1 present VA1v absent	Present		L4	4d_female_dpr10_55810_fruflp_1_20180917
	dpr 10 female brain 2	11	10	Absent	very very light loop present; sparse expression	all present but very thin	Present in both DA1 and both VA1vs	Present		E4	4d_female_dpr10_55810_fruflp_2_20180917
	dpr 10 female brain 3	2	14	Absent	loop absent; not much expression	thin arch, thin rings, thin junction, crescent absent	DA1 present VA1v absent	Present		Q2	4d_female_dpr10_55810_fruflp_3_20180917
	dpr 10 female brain 4	unscorable	9	Absent	loop absent	thin arch, thin rings, no junction, no crescent	DA1 present VA1v absent	Present		M1	4d_female_dpr10_55810_fruflp_4_20180917
	dpr 10 female brain 5	2	10	Absent	loop absent; not much expression	very faint light rings, thin junction, no crescent, arch unscorable	DA1 present VA1v absent	Present	Poor image quality	Q5	6d_female_dpr10_55810_fruflp_5_20180918
	dpr 10 male brain 1	10	12	Absent	sparse expression; loop present	all present (extended arch)	Absent	Present		B8	4d_male_dpr10_55810_fruflp_1_20180917
	dpr 10 male brain 2	8	10	Absent	loop present	thin arch, thin rings, crescent, junction present	Absent	Present		H7	4d_male_dpr10_55810_fruflp_2_20180917
	dpr 10 male brain 3	25	8	Absent	loop present	long arch, ring and crescent present; thick junction	Absent	Present		I2	7d_male_dpr10_55810_fruflp_4_20190217
	dpr 10 male brain 4	15	10	Absent	sparse expression; loop present	all present (extended arch; light rings)	Absent	Present		B9	7d_male_dpr10_55810_fruflp_5_20190217
	dpr 10 male brain 5	20	8	Absent	loop present	long arch, junction present	Absent	Present		F3	7d_male_dpr10_55810_fruflp_6_20190217
	dpr 11 female brain 1	unscorable	unscorable	Absent	loop absent	short arch, thin rings, thin junction, thin crescent	Present in both DA1 and both VA1vs	Absent	Poor image quality	O4	4-7day_dpr11gal4_fruFLP_uas_stop_mcd8gfp female
	dpr 11 female brain 2	image quality too poor to count	image quality too poor to count	Absent	sparse expression; loop absent	very thin arch, rings, junction, crescent	Present in both VA1vs absent in DA1	Absent		C8	4-7day_dpr11gal4_fruFLP_uas_stop_mcd8gfp female 2
	dpr 11 female brain 3	32	27	Absent	loop absent; large cell body at bottom of SOG; lots of expression	short arch; thin rings, junction and crescent present	Present in both DA1 (intense) and both VA1vs			H3	4-7day_dpr11gal4_fruFLP_uas_stop_mcd8gfp female 3
	dpr 11 female brain 4	32	15	Absent	loop absent	short arch, thin rings, thin junction, thin crescent	Present in both DA1 (intense) and both VA1vs	Absent		N5	4-7day_dpr11gal4_fruFLP_uas_stop_mcd8gfp female 4
	dpr 11 female brain 5	23	16	Absent	loop absent; not much expression	short arch, thin rings, thin junction, thin crescent	Present in both DA1 (intense) and both VA1vs	Absent		R3	4-7day_dpr11gal4_fruFLP_uas_stop_mcd8gfp female 5
	dpr 11 male brain 1	32	22	Present	cell bodies in SOG (loop present)	long arch; thick rings, thick junction, long thick crescent	Present in both DA1 (intense) and both VA1vs	Absent		E1	4-7day_dpr11gal4_fruFLP_uas_stop_mcd8gfp male
	dpr 11 male brain 2	37	29	Present	loop present (very bright)	long arch, thick rings, thick junction, thin crescent	Present in both DA1 (intense) and both VA1vs	Absent		N2	4-7day_dpr11gal4_fruFLP_uas_stop_mcd8gfp male 2
	dpr 11 male brain 3	34	35	Absent	loop present;	thick rings, thick junction, crescent present, long thick arch	Present in both DA1 (intense) and both VA1vs	Absent		P8	4-7day_dpr11gal4_fruFLP_uas_stop_mcd8gfp male 3
	dpr 11 male brain 4	image quality too poor to count	image quality too poor to count	Absent	loop present	all present; thick rings, thick junction	Present in both DA1 (faint) and both VA1vs	Absent		F6	4-7day_dpr11gal4_fruFLP_uas_stop_mcd8gfp male 4
	dpr 11 male brain 5	35	22	Present	loop present	long thick arch, thick rings, thick junction, crescent present	Present in both DA1 (intense) and both VA1vs	Absent		G5	4-7day_dpr11gal4_fruFLP_uas_stop_mcd8gfp male 5
	dpr 12 female brain 1	23	34	Absent	No, you can see the median bundle neurons project downwards but the loop is not seen in the stacks or in the 3D projection	Yes, all the parts of the complex are very light/faint in expression the arch fades into the junction which isn't very obvious (female like) and the ring and crescent are very light	Present in both DA1 and both VA1vs	Yes, present expression is not dense but it is bright		BS_B9	4-7day_dpr12gal4_fruFLP_uas_stop_mcd8gfp female 5
	dpr 12 female brain 2	20	25	Absent	Loop is absent	Yes, all are very faint and the arch is female like where it is thinner as it goes down into the junction and ring	Present in both DA1 and both VA1vs	Present		BS_E8	4-7day_dpr12gal4_fruFLP_uas_stop_mcd8gfp female 4
	dpr 12 female brain 3	21	31	Absent	Absent	The arch is present but thins as it moves towards the junction (female-like) the ring and crescent are very faint in expression which makes it hard to determine if the ring is complete and if the crescent is present	Present in both DA1 and both VA1vs	Present		BS_S3	4-7day_dpr12gal4_fruFLP_uas_stop_mcd8gfp female
	dpr 12 female brain 4	14	27	Absent	Loop is present but not completed in the SOG	All parts of the complex are present the arch is thin as it moves to the junction all parts of the complex are light in expression compared to the glomeruli and mushroom body	Present in both DA1 and both VA1vs	Present		BS_T5	4-7day_dpr12gal4_fruFLP_uas_stop_mcd8gfp female 2
	dpr 12 female brain 5	23	22	Absent	Loop is present but not completed in the SOG and is very faint in expression	All parts of the complex are present the arch is thin as it moves to the junction all parts of the complex are light in expression compared to the glomeruli and mushroom body	Present in both DA1 and both VA1vs	Present		BS_T7	4-7day_dpr12gal4_fruFLP_uas_stop_mcd8gfp female 3
	dpr 12 male brain 1	21	27	Absent	Yes, Faint	Yes, but faint and male-like	Absent	Present		BS_H2	4-7day_dpr12gal4_fruFLP_uas_stop_mcd8gfp male 5
	dpr 12 male brain 2	50	39	Present!	Loop is present	Yes, all parts of the complex are present but faint in expression levels compared to the mushroom body	Present in both DA1 and both VA1vs	Present		BS_P6	4-7day_dpr12gal4_fruFLP_uas_stop_mcd8gfp male v2
	dpr 12 male brain 3	39	27	Present	Loop is present	All the parts of the complex are present the arch tapers down into the junction/ ring (female-like) all parts of the complex are very faint in expression compared to the mushroom body expression	DA1 present VA1v absent	Present		BS_R5	4-7day_dpr12gal4_fruFLP_uas_stop_mcd8gfp male 3
	dpr 12 male brain 4	26	32	Present	Loop is present	thick arch expression (male-like) and all other components of the complex are present but slightly more faint in expression	DA1 present VA1v absent	Present		BS_S9	4-7day_dpr12gal4_fruFLP_uas_stop_mcd8gfp male 4
	dpr 12 male brain 5	36	35	Present	Loop is present	Yes, all	DA1 present VA1v absent	Present		BS_G3	4-7day_dpr12gal4_fruFLP_uas_stop_mcd8gfp male
	dpr 14 female brain 1	4	unscorable	Absent	sparse expression; loop absent	very light expression in all; short arch present, thin ring on left side, no junction nor crescent	Absent	Present		C7	4-7daysDpr14GAL4_UASstopsmGDPmycstop_FruFLP female
	dpr 14 female brain 2	3	15	Absent	sparse expression; loop absent	hard to see bc all expression is so dim but arch present and nothing else	DA1 present VA1v absent	Present		C9	4-7daysDpr14GAL4_UASstopsmGDPmycstop_FruFLP female 3
	dpr 14 female brain 3	1	5	Absent	loop absent; sparse expression	thin arch, very thin ring, junction and crescent absent	DA1 present VA1v absent	Present		L5	4-7daysDpr14GAL4_UASstopsmGDPmycstop_FruFLP female 4
	dpr 14 female brain 4	1	4	Absent	no	thin arch, thin rings, junction present; crescent absent	DA1 present VA1v absent	Present		I6	4-7daysDpr14GAL4_UASstopsmGDPmycstop_FruFLP female 5
	dpr 14 female brain 5	1	7	Absent	loop absent; lots of projection	short arch, can faintly see rings and junction but no crescent	DA1 present VA1v absent	Present		O5	4-7daysDpr14GAL4_UASstopsmGDPmycstop_FruFLP female 6
	dpr 14 male brain 1	13	18	Present	yes projections; loop present	arch present; very light ring on left side with crescent and junction	Absent	Present		C3	4-7daysDpr14GAL4_UASstopsmGDPmycstop_FruFLP male 3
	dpr 14 male brain 2	5	19	Absent	loop present	long arch present; all others absent	Absent	Present		G1	4-7daysDpr14GAL4_UASstopsmGDPmycstop_FruFLP male 4
	dpr 14 male brain 3	11	17	Absent	loop present; sparse expression	long arch present; ring, junction, crescent all absent	DA1 present VA1v absent	Present		M7	4-7daysDpr14GAL4_UASstopsmGDPmycstop_FruFLP male 5
	dpr 14 male brain 4	5	4	Absent	sparse expression; loop present	arch present but very light; ring, junction, crescent very light and thin	DA1 present VA1v absent	Present		C6	4-7daysDpr14GAL4_UASstopsmGDPmycstop_FruFLP male 6
	dpr 14 male brain 5	3	3	Absent	loop present; expression in SOG	long arch and junction present	Absent	Present		E5	4-7daysDpr14GAL4_UASstopsmGDPmycstop_FruFLP male 7
	dpr 15 female brain 1	unscorable	unscorable	Absent	loop absent	short arch, thin rings, thin junction, no crescent	Absent	Absent	Poor image quality	O3	4-7day_dpr15gal4_fruFLP_uas_stop_mcd8gfp female
	dpr 15 female brain 2	unscorable	4	Absent	projections; loop absent	unscorable	Absent	Absent		C1	4-7day_dpr15gal4_fruFLP_uas_stop_mcd8gfp female 2
	dpr 15 female brain 3	9	15	Absent	loop absent; lots of expression	short arch, thin rings, thin crescent, thin junction	DA1 present VA1v absent	Absent		K5	4-7day_dpr15gal4_fruFLP_uas_stop_mcd8gfp female 3
	dpr 15 female brain 4	3	5	Absent	loop absent	all present but thin and light; arch very thin and short	DA1 present VA1v absent	Absent		B5	4-7day_dpr15gal4_fruFLP_uas_stop_mcd8gfp female 4
	dpr 15 female brain 5	11	14	Absent	loop absent; sparse expression and 1 large cell body at bottom of SOG	short arch, thin ring, thin junction, thin crescent	DA1 present VA1v absent	Absent		N1	4-7day_dpr15gal4_fruFLP_uas_stop_mcd8gfp female 5
	dpr 15 male brain 1	27	20	Present	loop present	long, thick arch; thick rings, thick junction, crescent present	Absent	Absent		I4	4-7day_dpr15gal4_fruFLP_uas_stop_mcd8gfp male
	dpr 15 male brain 2	16	11	Absent	loop present	long arch, thick rings, junction and crescent present	DA1 present VA1v absent	Absent		G9	4-7day_dpr15gal4_fruFLP_uas_stop_mcd8gfp male 2
	dpr 15 male brain 3	18	19	Present	faint loop present; not much expression elsewhere	long thick arch, thick rings, thick junction, crescent absent	Absent	Absent		R5	4-7day_dpr15gal4_fruFLP_uas_stop_mcd8gfp male 4
	dpr 15 male brain 4	26	19	Present	loop present	long arch, thick rings, thick junction, thin crescent	Absent	Absent		O1	4-7day_dpr15gal4_fruFLP_uas_stop_mcd8gfp male 5
	dpr 15 male brain 5	14	18	Present	loop present	all present (thick ring and junction)	DA1 present VA1v absent	Absent		B7	4-7day_dpr15gal4_fruFLP_uas_stop_mcd8gfp male 6
	dpr 16 female brain 1	28	29	Absent	Small loop is present, projections downwards from the median bundle very fain though but there is branching present in the SOG	Yes, all the parts are present the junction is the brightest	Absent	No, but there is branching present in the mushroom body area of the brain		BS_D4	4-7day_dpr16gal4_fruFLP_uas_stop_mcd8gfp female 3
	dpr 16 female brain 2	18	28	Absent	Loop is absent but faint branching in the SOG	All parts of the junction are present	Absent	Absent		BS_K1	4-7day_dpr16gal4_fruFLP_uas_stop_mcd8gfp female 2
	dpr 16 female brain 3	13	20	Absent	A small loop is present in the SOG connecting the midline expression together mostly branching expression is visible in the SOG	Yes, all parts of the complex are present the arch expression thins in expression as it tapers down towards the junction of the complex bright in expression level	Absent	Absent		BS_N8	4-7day_dpr16gal4_fruFLP_uas_stop_mcd8gfp female 6
	dpr 16 female brain 4	13	30	Absent	Loop is absent	Yes, all present(female-like)	Absent	Absent		BS_J1	4-7day_dpr16gal4_fruFLP_uas_stop_mcd8gfp female 4 v2
	dpr 16 female brain 5	24	40	Absent	Loop is very faint but there is branching in the SOG	Yes, all the junctions is bright and the arch is thin	Absent	Absent		BS_F2	4-7day_dpr16gal4_fruFLP_uas_stop_mcd8gfp female
	dpr 16 male brain 1	21	30	Absent	there is a cut in the brain in the SOG are but the loop is present because you can see the two halves of the semi circle you just cant see the connection because of the cut and cant get a good idea of the SOG expression due to the cut	Yes, all the parts of the complex are present and the arch is thick in expression as it goes down to the junction which is male-like	Absent	No, but there is numerous cell bodies/ expression in that area of the brain (upper) it is symmetrical over the midline of the brain but not dense like a mushroom body or as long (eyebrows)		BS_A9	4-7day_dpr16gal4_fruFLP_uas_stop_mcd8gfp male 2
	dpr 16 male brain 2	2	0	Absent	Present, faint	All present but very faint	Absent	Absent	Poor image quality	BS_K9	4-7day_dpr16gal4_fruFLP_uas_stop_mcd8gfp male 5
	dpr 16 male brain 3	26	5	Present!	Loop is present and thick and bright in expression	All parts of the complex are present and thick and bright in expression (male-like)	Absent	No, branching expression in that area of the brain		BS_M8	4-7day_dpr16gal4_fruFLP_uas_stop_mcd8gfp male 3
	dpr 16 male brain 4	38	15	Present	Yes, present	Yes, all parts of complex are present and thick/bright in expression (male-like)	Absent	No, branching expression in that area of the brain		BS_N2	4-7day_dpr16gal4_fruFLP_uas_stop_mcd8gfp male
	dpr 16 male brain 5	13	26	Present	Loop is present and branching in the SOG	thick arch expression (male-like) and all other components of the complex are present but slightly more faint in expression	Absent	Absent		BS_T1	4-7day_dpr16gal4_fruFLP_uas_stop_mcd8gfp male 4
	dpr 17 female brain 1	18	30	Absent	loop absent; lots of expression, large cell body at bottom of SOG	thin arch, thin rings, thick junction, thick crescent	DA1 present VA1v absent	Absent	brain missing left eye lobe	K3	4-7day_dpr17gal4_fruFLP_uas_stop_mcd8gfp female 2
	dpr 17 female brain 2	5	24	Absent	loop absent; sparse expression and large cell bodies at bottom of SOG	short arch, thin ring, thick junction, thin crescent	DA1 present VA1v absent	Absent	Poor image quality	M9	4-7day_dpr17gal4_fruFLP_uas_stop_mcd8gfp female 3
	dpr 17 female brain 3	10	23	Absent	loop absent, sparse expression and large cell body at bottom	light thin rings, junction present, very thin crescent, very thin arch	Absent	Absent		P9	4-7day_dpr17gal4_fruFLP_uas_stop_mcd8gfp female 4
	dpr 17 female brain 4	10	25	Absent	loop absent; lots of expression	short arch, thin ring, junction and crescent present	DA1 present VA1v absent	Absent		G2	4-7day_dpr17gal4_fruFLP_uas_stop_mcd8gfp female 5
	dpr 17 female brain 5	unscorable	17	Absent	sparse expression, loop absent	junction absent; rest are thin	DA1 present VA1v absent	Absent		B6	4-7day_dpr17gal4_fruFLP_uas_stop_mcd8gfp female 6
	dpr 17 male brain 1	unscorable	7	Absent	loop present (light)	thin arch, very thick rings, very thick junction, thin crescent	Absent	Absent	Poor image quality	J6	4-7day_dpr17gal4_fruFLP_uas_stop_mcd8gfp male
	dpr 17 male brain 2	3	18	Absent	loop present	thick ring, long arch, all present	Absent	Absent		E7	4-7day_dpr17gal4_fruFLP_uas_stop_mcd8gfp male 2
	dpr 17 male brain 3	6	20	Absent	loop present	long arch, thick ring, thick junction, crescent	Absent	Absent		D8	4-7day_dpr17gal4_fruFLP_uas_stop_mcd8gfp male 3
	dpr 17 male brain 4	15	2	Absent	loop present	thick long arch, thick rings, thick junction, thin crescent	Absent	Absent		R7	4-7day_dpr17gal4_fruFLP_uas_stop_mcd8gfp male 4
	dpr 17 male brain 5	6	20	Absent	faint loop present; not much expression otherwise	long arch, thick rings, thick junction, crescent present	Absent	Absent		R2	4-7day_dpr17gal4_fruFLP_uas_stop_mcd8gfp male 5
	dpr 18 female brain 1	16	21	Absent	Loop absent branching present in SOG	Arch is very faint almost missing but junction, ring, and crescent present	Absent	Absent		BS_J9	4-7daysDpr18GAL4_UASstopsmGDPmycstop_FruFLP female
	dpr 18 female brain 2	13	14	Absent	Yes, but very faint and mostly seen completed in one stack lots of branching in the SOG	Yes, all parts are present however there is an additional "ring" like expression above the ring of the complex	Absent	No, but branching expression in that area of the brain		BS_K7	4-7daysDpr18GAL4_UASstopsmGDPmycstop_FruFLP female 5
	dpr 18 female brain 3	13	9	Absent	Absent, cuts in the SOG	Yes, all parts of the complex are present, faint in expression where it is hard to see if the arch completes as it meets the junction or if the ring completes	DA1 present VA1v absent	Absent		BS_Q2	4-7daysDpr18GAL4_UASstopsmGDPmycstop_FruFLP female 2
	dpr 18 female brain 4	17	9	Absent	Loop is absent but there is expression in the SOG more on the right side of the brain visible in the 3D projection	Yes, all the junction is larger than usual and the additional "ring" above the ring of the complex is present but it is not a complete circle it is missing the expression on the top	Absent	Absent		BS_C8	4-7daysDpr18GAL4_UASstopsmGDPmycstop_FruFLP female 4
	dpr 18 female brain 5	16	13	Present	Present	Yes, all present (female-like)	Absent	Absent		BS_G7	4-7daysDpr18GAL4_UASstopsmGDPmycstop_FruFLP female 3
	dpr 18 male brain 1	18	21	Present	Loop is present	Yes, all arch is thick (male-like)	Absent	Absent		BS_D9	4-7daysDpr18GAL4_UASstopsmGDPmycstop_FruFLP male 4
	dpr 18 male brain 2	16	20	Present	Present, dark/thick	All parts of the complex are present and male like expression pattern with the arch being thick in expression as it moves to the junction	Present in both DA1 and both VA1vs	Absent		BS_M1	4-7daysDpr18GAL4_UASstopsmGDPmycstop_FruFLP male 5
	dpr 18 male brain 3	24	25	Present	Present, dark/thick	All parts of the complex are present the junction is the brightest and the arch is not thick, it tapers down into the junction	Absent	No, not quite mushrooms body because it is not horizontal and in the spot above the glomeruli but instead its at a slight angle	Interesting expression pattern	BS_M2	4-7daysDpr18GAL4_UASstopsmGDPmycstop_FruFLP male 6
	dpr 18 male brain 4	24	29	Present	loop is present in the SOG	All parts of the complex are present the junction is the thickest in expression all of the complex is faint in expression	Absent	Absent		BS_O2	4-7daysDpr18GAL4_UASstopsmGDPmycstop_FruFLP male 3
	dpr 18 male brain 5	4	32	Absent	Loop is present	All parts of the complex are present the arch is thin in expression (female-like) as it moves toward the junction the ring and crescent are present but very faint in expression the ring also goes into the loop in the OSG which I feel like I haven't noticed before and other (crimic) brains	Absent	Absent		BS_S8	4-7daysDpr18GAL4_UASstopsmGDPmycstop_FruFLP male

## Sheet: Raw Data VNC
A key for columns D-L is provided in 'items scored' in Read_Me sheet, with definitions for abbreviations	Abbreviated genotype	Top (cell body count)	T1 (cell body count)	T2 wing (cell body count)	T2 (cell body count)	T3 (cell body count)	Abdominal ganglion (cell body count)	VNC total cell count	Midline Crossing in VNC (present/ absent)	Mesothoracic Triangle Neurons (present/ absent)	Comments	Internal Lab Notation: Blinded Image File name	Internal Lab Notation: Confocal Image File Name
	DIP alpha female VNC 1	1	0	3	2	1	4	11	Present	Absent		BB6	6d_female_vnc_DIPalpha_55810_fruflp_3_20181106
	DIP alpha female VNC 2	0	1	2	2	2	4	11	Present	too faint		BB8	6d_female_vnc_DIPalpha_55810_fruflp_2_20181106
	DIP alpha female VNC 3	1	0	5	3	3	2	14	Absent	Absent		DD6	6d_female_vnc_DIPalpha_55810_fruflp_6_20181106
	DIP alpha female VNC 4	0	0	1	3	6	1	11	Absent	Absent		FF9	6d_female_vnc_DIPalpha_55810_fruflp_4_20181106
	DIP alpha female VNC 5	0	0	3	4	2	3	12	Absent	Present		GG7	6d_female_vnc_DIPalpha_55810_fruflp_5_20181106
	DIP alpha male VNC 1	0	0	1	4	3	7	15	unscorable	Absent		CC0	6d_male_vnc_DIPalpha_55810_fruflp_2_20181106
	DIP alpha male VNC 2	0	1	4	0	1	2	8	unscorable	Absent		CC6	6d_male_vnc_DIPalpha_55810_fruflp_5_20181106
	DIP alpha male VNC 3	0	3	0	1	1	5	10	Poor image quality	Poor image quality		EE3	6d_male_vnc_DIPalpha_55810_fruflp_4_20181106
	DIP alpha male VNC 4	0	0	3	0	0	4	7	Absent	Absent		FF8	6d_male_vnc_DIPalpha_55810_fruflp_3_20181106
	DIP alpha male VNC 5	0	2	4	2	2	2	12	Absent	Absent		GG6	6d_male_vnc_DIPalpha_55810_fruflp_1_20181106
	DIP beta female VNC 1	1	0	13	0	0	16	30	unscorable	unscorable		AA0	4-7day_DIPBetagal4_fruFLP_uas_stop_mcd8gfp female 3
	DIP beta female VNC 2	2	0	10	0	0	6	18	unscorable	unscorable		AA6	4-7day_DIPBetagal4_fruFLP_uas_stop_mcd8gfp female 4
	DIP beta female VNC 3	4	0	13	0	1	9	27	Absent	Absent		BB2	4-7day_DIPBetagal4_fruFLP_uas_stop_mcd8gfp female 1
	DIP beta female VNC 4	0	0	7	1	0	7	15	Poor image quality	Poor image quality		EE8	4-7day_DIPBetagal4_fruFLP_uas_stop_mcd8gfp female 2
	DIP beta female VNC 5	1	3	14	5	2	13	38	Present	Absent		FF6	4-7day_DIPBetagal4_fruFLP_uas_stop_mcd8gfp female 5
	DIP beta male VNC 1	0	0	4	0	0	8	12	Poor image quality	Poor image quality		AA4	4-7day_DIPBetagal4_fruFLP_uas_stop_mcd8gfp male VNC 4
	DIP beta male VNC 2	unscorable	3	6	2	1	18	30	Present	Absent		CC9	4-7day_DIPBetagal4_fruFLP_uas_stop_mcd8gfp male VNC 5
	DIP beta male VNC 3	6	0	23	3	2	17	51	Present	Present		DD3	4-7day_DIPBetagal4_fruFLP_uas_stop_mcd8gfp male VNC 3
	DIP beta male VNC 4	2	7	7	10	7	unscorable	unscorable	Present	Present	Poor image quality	FF4	4-7day_DIPBetagal4_fruFLP_uas_stop_mcd8gfp male VNC 1
	DIP beta male VNC 5	2	6	7	1	5	2	23	Absent	Absent	Poor image quality	GG5	4-7day_DIPBetagal4_fruFLP_uas_stop_mcd8gfp male VNC 2
	DIP delta female VNC 1	4	0	4	7	0	4	19	Absent	Absent		AA8	6d_female_DIPdelta_VNC_55810_fruflp_3_20190201
	DIP delta female VNC 2	1	1	5	0	1	8	16	Absent	Absent		CC5	6d_female_DIPdelta_VNC_55810_fruflp_4_20190201
	DIP delta female VNC 3	0	2	3	11	4	15	35	Present	Absent		EE4	6d_female_DIPdelta_VNC_55810_fruflp_1_20181005
	DIP delta female VNC 4	0	0	2	6	1	6	15	unscorable	meso		HH3	6d_female_DIPdelta_VNC_55810_fruflp_2_20181005
	DIP delta female VNC 5	3	0	8	5	3	0	19	Absent	Present		HH5	6d_female_DIPdelta_VNC_55810_fruflp_5_20190201
	DIP delta male VNC 1	0	0	10	12	9	16	47	Present	Absent		DD8	6d_male_DIPdelta_VNC_55810_fruflp_5_20190201
	DIP delta male VNC 2	1	0	4	13	0	7	25	Present	Absent		EE5	6d_male_DIPdelta_VNC_55810_fruflp_2_20181005
	DIP delta male VNC 3	0	0	13	17	4	16	50	Present	Absent		FF2	6d_male_DIPdelta_VNC_55810_fruflp_1_20181005
	DIP delta male VNC 4	2	0	9	18	10	20	59	Absent	Absent		HH0	6d_male_DIPdelta_VNC_55810_fruflp_6_20190201
	DIP delta male VNC 5	0	0	9	15	2	13	39	Present	Present		HH6	6d_male_DIPdelta_VNC_55810_fruflp_4_20190201
	DIP epsilon female VNC 1	5	0	12	1	6	8	32	Absent	Present		BB1	4-7day_DIPepsilongal4_fruFLP_uas_stop_mcd8gfp female VNC 5
	DIP epsilon female VNC 2	1	0	4	0	1	unscorable	unscorable	unscorable	Poor image quality		BB4	4-7day_DIPepsilongal4_fruFLP_uas_stop_mcd8gfp female VNC 2
	DIP epsilon female VNC 3	4	0	17	4	7	12	44	Present	Present		FF0	4-7day_DIPepsilongal4_fruFLP_uas_stop_mcd8gfp female VNC 4
	DIP epsilon female VNC 4	1	0	14	3	0	11	29	Present	Absent		FF5	4-7day_DIPepsilongal4_fruFLP_uas_stop_mcd8gfp female VNC 3
	DIP epsilon female VNC 5	0	0	9	2	2	3	16	no	Absent		HH2	4-7day_DIPepsilongal4_fruFLP_uas_stop_mcd8gfp female VNC 1
	DIP epsilon male VNC 1	0	0	12	0	0	unscorable	unscorable	unscorable	unscorable	Poor image quality	AA2	4-7day_DIPepsilongal4_fruFLP_uas_stop_mcd8gfp male VNC 2
	DIP epsilon male VNC 2	0	1	14	11	6	11	43	Absent	Absent		AA9	4-7day_DIPepsilongal4_fruFLP_uas_stop_mcd8gfp male VNC 5
	DIP epsilon male VNC 3	0	1	16	1	6	13	37	Present	Absent	bright cluster at tip of Abg	BB3	4-7day_DIPepsilongal4_fruFLP_uas_stop_mcd8gfp male VNC 1
	DIP epsilon male VNC 4	1	0	9	1	1	8	20	Absent	Absent		BB7	4-7day_DIPepsilongal4_fruFLP_uas_stop_mcd8gfp male VNC 3
	DIP epsilon male VNC 5	0	0	2	2	0	9	13	Absent	Absent		DD0	4-7day_DIPepsilongal4_fruFLP_uas_stop_mcd8gfp male VNC 4
	DIP eta female VNC 1	2	0	8	0	3	2	15	Present	Absent		AA5	6d_female_DIPeta_vnc_55810_fruflp_2_20181005
	DIP eta female VNC 2	6	0	6	0	1	unscorable	unscorable	faint	faint	Poor image quality	DD9	4d_female_DIPeta_vnc_55810_fruflp_4_20181005
	DIP eta female VNC 3	3	4	15	2	3	4	31	Present	meso tri		EE6	6d_female_DIPeta_vnc_55810_fruflp_1_20181005
	DIP eta female VNC 4	3	0	6	0	0	1	10	Absent	Absent		GG8	4d_female_DIPeta_vnc_55810_fruflp_3_20181005
	DIP eta female VNC 5	5	2	3	2	1	1	14	Absent	Absent		HH7	4d_female_DIPeta_vnc_55810_fruflp_5_20181005
	DIP eta male VNC 1	5	2	10	4	1	1	23	Present	Absent		AA7	6d_male_VNC_DIPeta_55810_fruflp_2_20180918
	DIP eta male VNC 2	5	2	12	4	3	2	28	Absent	Present		BB9	6d_male_VNC_DIPeta_55810_fruflp_5_20180918
	DIP eta male VNC 3	4	0	20	2	4	3	33	Present	Present		CC7	6d_male_VNC_DIPeta_55810_fruflp_4_20180918
	DIP eta male VNC 4	6	0	17	9	10	3	45	Present	Present		DD5	6d_male_VNC_DIPeta_55810_fruflp_3_20181005
	DIP eta male VNC 5	4	2	13	4	6	2	31	Present	Present		HH9	6d_male_VNC_DIPeta_55810_fruflp_7_20180918
	DIP gamma female VNC 1	0	0	0	8	3	8	19	Poor image quality	Poor image quality		CC1	6d__female_DIPgamma_VNC_55810_fruflp_4_20180918
	DIP gamma female VNC 2	3	0	3	3	5	16	30	Poor image quality	Present		CC4	6d__female_DIPgamma_VNC_55810_fruflp_2_20180918
	DIP gamma female VNC 3	5	0	10	6	5	22	48	Present	Present		EE1	6d__female_DIPgamma_VNC_55810_fruflp_3_20180918
	DIP gamma female VNC 4	8	3	5	6	15	17	54	Present	Present		FF1	6d__female_DIPgamma_VNC_55810_fruflp_1_20180918
	DIP gamma female VNC 5	9	0	6	0	5	10	30	Absent	Absent		GG4	7d__female_DIPgamma_VNC_55810_fruflp_5_20190220
	DIP gamma male VNC 1	6	0	2	5	1	12	26	midline crossing	Present		AA3	6d__male_DIPgamma_VNC_55810_fruflp_1_20180918
	DIP gamma male VNC 2	0	1	0	5	1	11	18	Poor image quality	Poor image quality		BB0	6d__male_DIPgamma_VNC_55810_fruflp_2_20180918
	DIP gamma male VNC 3	4	0	2	7	4	13	30	Poor image quality	meso tri		CC3	6d__male_DIPgamma_VNC_55810_fruflp_3_20180918
	DIP gamma male VNC 4	9	0	12	3	0	17	41	Absent	Absent		DD4	6d__male_DIPgamma_VNC_55810_fruflp_5_20180918
	DIP gamma male VNC 5	0	0	2	7	3	12	24	Absent	Absent	Poor image quality	HH1	6d__male_DIPgamma_VNC_55810_fruflp_4_20180918
	DIP theta female VNC 1	5	2	10	0	0	9	26	NA	NA		AA1	4-7day_DIPthetagal4_fruFLP_uas_stop_mcd8gfp female VNC 1
	DIP theta female VNC 2	0	0	10	3	8	10	31	Poor image quality	Absent		CC2	4-7day_DIPthetagal4_fruFLP_uas_stop_mcd8gfp female VNC 5
	DIP theta female VNC 3	2	0	10	1	3	5	21	Absent	Absent		EE2	4-7day_DIPthetagal4_fruFLP_uas_stop_mcd8gfp female VNC 3
	DIP theta female VNC 4	2	3	10	5	0	8	28	Absent	Absent		GG0	4-7day_DIPthetagal4_fruFLP_uas_stop_mcd8gfp female VNC 4
	DIP theta female VNC 5	3	0	9	3	4	4	23	Absent	Absent		GG9	4-7day_DIPthetagal4_fruFLP_uas_stop_mcd8gfp female VNC 2
	DIP theta male VNC 1	5	4	14	13	8	18	62	Present	Present		CC8	4-7day_DIPthetagal4_fruFLP_uas_stop_mcd8gfp male VNC 5
	DIP theta male VNC 2	2	9	4	9	0	9	33	Present	Present		DD1	4-7day_DIPthetagal4_fruFLP_uas_stop_mcd8gfp male VNC 7
	DIP theta male VNC 3	3	8	4	7	6	13	41	Present	Present		DD7	4-7day_DIPthetagal4_fruFLP_uas_stop_mcd8gfp male VNC 3
	DIP theta male VNC 4	2	0	13	1	6	21	43	Present	Present		EE9	4-7day_DIPthetagal4_fruFLP_uas_stop_mcd8gfp male VNC 4
	DIP theta male VNC 5	1	0	16	6	0	20	43	Present	Present		GG2	4-7day_DIPthetagal4_fruFLP_uas_stop_mcd8gfp male VNC 8
	DIP zeta female VNC 1	unscorable	unscorable	unscorable	unscorable	unscorable	unscorable	unscorable	Poor image quality	Poor image quality		BB5	4-7day_DIPzetagal4_fruFLP_uas_stop_mcd8gfp female VNC 3
	DIP zeta female VNC 2	1	0	3	0	0	3	7	Poor image quality	Absent		DD2	4-7day_DIPzetagal4_fruFLP_uas_stop_mcd8gfp female VNC 2
	DIP zeta female VNC 3	0	0	2	2	0	4	8	Absent	Absent		GG3	4-7day_DIPzetagal4_fruFLP_uas_stop_mcd8gfp female VNC 4
	DIP zeta female VNC 4	0	0	10	0	0	9	19	Present	Absent		HH4	4-7day_DIPzetagal4_fruFLP_uas_stop_mcd8gfp female VNC 1
	DIP zeta female VNC 5	0	0	8	3	0	4	15	Absent	Absent		HH8	4-7day_DIPzetagal4_fruFLP_uas_stop_mcd8gfp female VNC 5
	DIP zeta male VNC 1	0	0	0	0	0	2	2	Absent	Absent	small, faint	EE0	4-7day_DIPzetagal4_fruFLP_uas_stop_mcd8gfp male VNC 1
	DIP zeta male VNC 2	0	8	0	0	0	3	11	Present	Present		EE7	4-7day_DIPzetagal4_fruFLP_uas_stop_mcd8gfp male VNC 4
	DIP zeta male VNC 3	2	0	3	0	0	0	5	Poor image quality	Poor image quality		FF3	4-7day_DIPzetagal4_fruFLP_uas_stop_mcd8gfp male VNC 2
	DIP zeta male VNC 4	3	0	4	2	5	6	20	Absent	Absent		FF7	4-7day_DIPzetagal4_fruFLP_uas_stop_mcd8gfp male VNC 5
	DIP zeta male VNC 5	0	0	9	0	0	4	13	Present	Absent		GG1	4-7day_DIPzetagal4_fruFLP_uas_stop_mcd8gfp male VNC 3
	dpr 1 female VNC 1	5	0	14	9	4	10	42	Absent	Absent		K6	4-7day_dpr1gal4_fruFLP_uas_stop_mcd8gfp female VNC
	dpr 1 female VNC 2	3	0	15	6	6	17	47	Absent	Absent		J7	4-7day_dpr1gal4_fruFLP_uas_stop_mcd8gfp female VNC 2
	dpr 1 female VNC 3	3	unscorable	13	19	11	20	unscorable	Absent	Absent	Poor image quality	H9	4-7day_dpr1gal4_fruFLP_uas_stop_mcd8gfp female VNC 3
	dpr 1 female VNC 4	0	1	17	8	14	9	49	Absent	Absent	many cell bodies but all clustered around T2 wing and Abg	A1	4-7day_dpr1gal4_fruFLP_uas_stop_mcd8gfp female VNC 4
	dpr 1 female VNC 5	5	2	21	9	5	11	53	Absent	Absent		O8	4-7day_dpr1gal4_fruFLP_uas_stop_mcd8gfp female VNC 5
	dpr 1 male VNC 1	4	5	27	8	12	25	81	Present	Present		L1	4-7day_dpr1gal4_fruFLP_uas_stop_mcd8gfp male VNC
	dpr 1 male VNC 2	9	1	36	15	5	42	108	Present	Present		H5	4-7day_dpr1gal4_fruFLP_uas_stop_mcd8gfp male VNC 2
	dpr 1 male VNC 3	7	0	14	8	11	18	58	Present	Present	Poor image quality	P3	4-7day_dpr1gal4_fruFLP_uas_stop_mcd8gfp male VNC 3
	dpr 1 male VNC 4	4	2	unscorable	4	9	unscorable	52	Present	Present		M3	4-7day_dpr1gal4_fruFLP_uas_stop_mcd8gfp male VNC 4
	dpr 1 male VNC 5	3	3	19	11	11	29	76	Present	Present	abg lots of projections	C2	4-7day_dpr1gal4_fruFLP_uas_stop_mcd8gfp male VNC 5
	dpr 2 female VNC 1	6	7	16	9	9	17	64	Absent	Absent		BS_B2	4-7day_dpr2gal4_fruFLP_uas_stop_mcd8gfp female VNC
	dpr 2 female VNC 2	1	4	9	6	4	17	41	Absent	Absent	Poor image quality	BS_E3	4-7day_dpr2gal4_fruFLP_uas_stop_mcd8gfp female VNC 3
	dpr 2 female VNC 3	7	6	12	12	6	23	66	Absent	Absent		BS_E9	4-7day_dpr2gal4_fruFLP_uas_stop_mcd8gfp female VNC 2
	dpr 2 female VNC 4	9	2	14	7	2	15	49	Absent	Absent		BS_O5	4-7day_dpr2gal4_fruFLP_uas_stop_mcd8gfp female VNC 5
	dpr 2 female VNC 5	5	1	10	6	4	13	39	Absent	Absent		BS_T4	4-7day_dpr2gal4_fruFLP_uas_stop_mcd8gfp female VNC 4
	dpr 2 male VNC 1	13	10	28	29	7	37	124	Present	Present	Finally very confident that the triangle and midline crossing is present	BS_B1	4-7day_dpr2gal4_fruFLP_uas_stop_mcd8gfp male VNC
	dpr 2 male VNC 2	3	5	24	24	16	35	107	Absent	Absent		BS_C4	4-7day_dpr2gal4_fruFLP_uas_stop_mcd8gfp male VNC 4
	dpr 2 male VNC 3	7	17	26	26	14	30	120	Present	Present		BS_M5	4-7day_dpr2gal4_fruFLP_uas_stop_mcd8gfp male VNC 3
	dpr 2 male VNC 4	4	12	20	24	2	27	89	Present	Present		BS_O9	4-7day_dpr2gal4_fruFLP_uas_stop_mcd8gfp male VNC 5
	dpr 2 male VNC 5	6	12	25	19	21	34	117	Present	Present		BS_R7	4-7day_dpr2gal4_fruFLP_uas_stop_mcd8gfp male VNC 2
	dpr 3 female VNC 1	6	3	12	9	6	15	51	Absent	Absent		L2	4-7day_dpr3gal4_fruFLP_uas_stop_mcd8gfp female VNC
	dpr 3 female VNC 2	6	0	13	5	8	16	48	Absent	Absent		M2	4-7day_dpr3gal4_fruFLP_uas_stop_mcd8gfp female VNC 2
	dpr 3 female VNC 3	7	0	17	9	14	15	62	Absent	Absent		G6	4-7day_dpr3gal4_fruFLP_uas_stop_mcd8gfp female VNC 3
	dpr 3 female VNC 4	3	6	10	3	7	14	43	Absent	Absent		M6	4-7day_dpr3gal4_fruFLP_uas_stop_mcd8gfp female VNC 4
	dpr 3 female VNC 5	15	6	7	4	6	11	49	Absent	Absent		F1	4-7day_dpr3gal4_fruFLP_uas_stop_mcd8gfp female VNC 5
	dpr 3 male VNC 1	5	0	17	12	unscorable	unscorable	unscorable	Present	Absent		C5	4-7day_dpr3gal4_fruFLP_uas_stop_mcd8gfp male VNC
	dpr 3 male VNC 2	6	1	unscorable	13	9	15	unscorable	Present	Absent	Poor image quality	A4	4-7day_dpr3gal4_fruFLP_uas_stop_mcd8gfp male VNC 2
	dpr 3 male VNC 3	13	9	18	19	16	23	98	Present	Present		I5	4-7day_dpr3gal4_fruFLP_uas_stop_mcd8gfp male VNC 3
	dpr 3 male VNC 4	3	8	17	12	10	unscorable	unscorable	Present	Present		F4	4-7day_dpr3gal4_fruFLP_uas_stop_mcd8gfp male VNC 4
	dpr 3 male VNC 5	5	4	11	15	7	15	57	Present	Absent		H4	4-7day_dpr3gal4_fruFLP_uas_stop_mcd8gfp male VNC 5
	dpr 4 female VNC 1	5	5	20	11	13	16	70	Present	Present	Poor image quality	BS_J4	4-7daysDpr4GAL4_UASstopsmGDPmycstop_FruFLP female VNC 4
	dpr 4 female VNC 2	0	1	8	4	11	14	38	Absent	Absent	Poor image quality	BS_J5	4-7daysDpr4GAL4_UASstopsmGDPmycstop_FruFLP female VNC 7
	dpr 4 female VNC 3	2	2	15	7	5	13	44	Present	Absent		BS_O4	4-7daysDpr4GAL4_UASstopsmGDPmycstop_FruFLP female VNC 5
	dpr 4 female VNC 4	6	7	13	16	9	17	68	Absent	Absent		BS_Q7	4-7daysDpr4GAL4_UASstopsmGDPmycstop_FruFLP female VNC 3
	dpr 4 female VNC 5	5	7	9	5	11	10	47	Absent	Absent		BS_T2	4-7daysDpr4GAL4_UASstopsmGDPmycstop_FruFLP female VNC 6
	dpr 4 male VNC 1	10	5	20	2	13	18	68	Present	Present		BS_B8	4-7daysDpr4GAL4_UASstopsmGDPmycstop_FruFLP male VNC 4
	dpr 4 male VNC 2	5	12	25	16	12	21	91	Present	Present		BS_C7	4-7daysDpr4GAL4_UASstopsmGDPmycstop_FruFLP male VNC 6
	dpr 4 male VNC 3	6	20	20	13	11	19	89	No, Branching doesn't meet in the middle	Yes, thick expression		BS_G8	4-7daysDpr4GAL4_UASstopsmGDPmycstop_FruFLP male VNC 5
	dpr 4 male VNC 4	11	15	16	7	19	26	94	Present	Present		BS_J6	4-7daysDpr4GAL4_UASstopsmGDPmycstop_FruFLP male VNC 3
	dpr 4 male VNC 5	1	3	17	13	6	16	56	Present	Present		BS_P5	4-7daysDpr4GAL4_UASstopsmGDPmycstop_FruFLP male VNC
	dpr 5 female VNC 1	7	0	19	5	8	16	55	Absent	Absent		BS_F8	6d_female_dpr5_VNC_55810_fruflp_5_20181002
	dpr 5 female VNC 2	6	10	9	10	4	13	52	Absent	Absent		BS_K4	6d_female_dpr5_VNC_55810_fruflp_2_20181002
	dpr 5 female VNC 3	2	5	21	14	14	27	83	Absent	Absent		BS_O3	6d_female_dpr5_VNC_55810_fruflp_7_20181002
	dpr 5 female VNC 4	5	2	16	5	7	18	53	Absent	Absent		BS_P3	6d_female_dpr5_VNC_55810_fruflp_6_20181002
	dpr 5 female VNC 5	8	10	25	9	11	24	87	Absent	Absent		BS_S2	6d_female_dpr5_VNC_55810_fruflp_4_20181002
	dpr 5 male VNC 1	7	19	17	28	6	38	115	Present	Present	Poor image quality	BS_A6	7d_male_dpr5_VNC_55810_fruflp_5_20190218
	dpr 5 male VNC 2	4	18	27	23	6	34	112	Present	Present		BS_F4	7d_male_dpr5_VNC_55810_fruflp_4_20190218
	dpr 5 male VNC 3	0	16	30	33	7	29	115	Present	Present		BS_J3	6d_male_dpr5_VNC_55810_fruflp_2_20181002
	dpr 5 male VNC 4	8	5	21	24	31	21	110	Present	Present		BS_Q3	6d_male_dpr5_VNC_55810_fruflp_1_20181002
	dpr 5 male VNC 5	4	18	31	23	15	45	136	Present	Present		BS_Q5	6d_male_dpr5_VNC_55810_fruflp_3_20181002
	dpr 6 female VNC 1	10	18	8	6	7	13	62	Absent	Absent		BS_D3	4-7day_dpr6gal4_fruFLP_uas_stop_mcd8gfp female VNC 3
	dpr 6 female VNC 2	5	8	12	9	4	15	53	Absent	Absent		BS_D8	4-7day_dpr6gal4_fruFLP_uas_stop_mcd8gfp female VNC 7
	dpr 6 female VNC 3	7	13	13	8	6	24	71	Absent	Absent		BS_G1	4-7day_dpr6gal4_fruFLP_uas_stop_mcd8gfp female VNC
	dpr 6 female VNC 4	4	4	20	11	0	4	43	Absent	Absent	Poor image quality	BS_G4	4-7day_dpr6gal4_fruFLP_uas_stop_mcd8gfp female VNC 4
	dpr 6 female VNC 5	2	5	15	9	7	15	53	Absent	Absent		BS_G9	4-7day_dpr6gal4_fruFLP_uas_stop_mcd8gfp female VNC 6
	dpr 6 male VNC 1	10	6	19	11	11	23	80	Absent	Present		BS_A7	4-7day_dpr6gal4_fruFLP_uas_stop_mcd8gfp male VNC 4
	dpr 6 male VNC 2	6	11	26	16	8	33	100	Present	Present		BS_F6	4-7day_dpr6gal4_fruFLP_uas_stop_mcd8gfp male VNC 3
	dpr 6 male VNC 3	4	17	2	15	5	19	62	Absent	Absent		BS_K2	4-7day_dpr6gal4_fruFLP_uas_stop_mcd8gfp male VNC
	dpr 6 male VNC 4	3	6	7	24	9	21	70	Present	Present		BS_O1	4-7day_dpr6gal4_fruFLP_uas_stop_mcd8gfp male VNC 5
	dpr 6 male VNC 5	7	13	19	21	10	27	97	Present	Present		BS_P8	4-7day_dpr6gal4_fruFLP_uas_stop_mcd8gfp male VNC 2
	dpr 8 female VNC 1	5	7	30	11	4	unscorable	unscorable	Absent	Absent	Poor image quality	M5	4-7day_dpr8gal4_fruFLP_uas_stop_mcd8gfp female VNC
	dpr 8 female VNC 2	5	6	26	4	10	16	67	Absent	Absent		O7	4-7day_dpr8gal4_fruFLP_uas_stop_mcd8gfp female VNC 2
	dpr 8 female VNC 3	6	1	20	11	10	17	65	Absent	Absent		D1	4-7day_dpr8gal4_fruFLP_uas_stop_mcd8gfp female VNC 3
	dpr 8 female VNC 4	0	5	22	9	14	14	64	Absent	very very faint		G3	4-7day_dpr8gal4_fruFLP_uas_stop_mcd8gfp female VNC 4
	dpr 8 female VNC 5	9	3	24	5	17	16	74	Absent	Absent		C4	4-7day_dpr8gal4_fruFLP_uas_stop_mcd8gfp female VNC 5
	dpr 8 male VNC 1	3	4	34	19	16	20	96	Present	Present		G4	4-7day_dpr8gal4_fruFLP_uas_stop_mcd8gfp male VNC
	dpr 8 male VNC 2	0	8	21	10	12	19	70	Present	Absent		A7	4-7day_dpr8gal4_fruFLP_uas_stop_mcd8gfp male VNC 2
	dpr 8 male VNC 3	3	7	16	22	12	26	86	unscorable	Present	Poor image quality	P1	4-7day_dpr8gal4_fruFLP_uas_stop_mcd8gfp male VNC 3
	dpr 8 male VNC 4	5	5	29	4	5	17	65	Present	Present		A5	4-7day_dpr8gal4_fruFLP_uas_stop_mcd8gfp male VNC 4
	dpr 8 male VNC 5	0	10	27	20	10	30	97	Present	Present		N9	4-7day_dpr8gal4_fruFLP_uas_stop_mcd8gfp male VNC 5
	dpr 9 female VNC 1	7	5	22	6	6	22	68	Absent	Absent		BS_C6	4-7day_dpr9gal4_fruFLP_uas_stop_mcd8gfp female VNC 3
	dpr 9 female VNC 2	9	5	16	13	2	21	66	Absent	Absent		BS_H1	4-7day_dpr9gal4_fruFLP_uas_stop_mcd8gfp female VNC
	dpr 9 female VNC 3	8	8	16	4	7	14	57	Absent	Absent		BS_N5	4-7day_dpr9gal4_fruFLP_uas_stop_mcd8gfp female VNC 2
	dpr 9 female VNC 4	5	7	15	6	8	21	62	Absent	Absent		BS_R2	4-7day_dpr9gal4_fruFLP_uas_stop_mcd8gfp female VNC 5
	dpr 9 female VNC 5	6	7	25	16	16	18	88	Absent	Absent		BS_R9	4-7day_dpr9gal4_fruFLP_uas_stop_mcd8gfp female VNC 4
	dpr 9 male VNC 1	6	11	18	4	10	29	78	Present	Present		BS_G5	4-7day_dpr9gal4_fruFLP_uas_stop_mcd8gfp male VNC 4
	dpr 9 male VNC 2	3	6	9	4	8	26	56	Absent	Absent		BS_J7	4-7day_dpr9gal4_fruFLP_uas_stop_mcd8gfp male VNC
	dpr 9 male VNC 3	4	9	21	10	6	24	74	Present	Present		BS_M6	4-7day_dpr9gal4_fruFLP_uas_stop_mcd8gfp male VNC 5
	dpr 9 male VNC 4	4	4	10	6	8	23	55	Present	No		BS_P7	4-7day_dpr9gal4_fruFLP_uas_stop_mcd8gfp male VNC 2
	dpr 9 male VNC 5	13	10	33	20	18	36	130	Present	Present		BS_Q9	4-7day_dpr9gal4_fruFLP_uas_stop_mcd8gfp male VNC 3
	dpr 10 female VNC 1	6	6	21	4	9	22	68	Absent	Absent		P5	6d_female_dpr10_VNC_55810_fruflp_1_20181005
	dpr 10 female VNC 2	4	15	19	5	unscorable	unscorable	unscorable	Absent	Absent	Poor image quality	N6	6d_female_dpr10_VNC_55810_fruflp_2_20181005
	dpr 10 female VNC 3	3	7	13	13	16	22	74	Absent	Absent		M4	6d_female_dpr10_VNC_55810_fruflp_3_20181005
	dpr 10 female VNC 4	4	2	19	11	14	18	68	Present	Absent		J5	7d_female_dpr10_VNC_55810_fruflp_5_20190220
	dpr 10 female VNC 5	5	2	14	12	7	25	65	Absent	Absent		E8	7d_female_dpr10_VNC_55810_fruflp_6_20190220
	dpr 10 male VNC 1	7	5	17	21	20	29	99	Present	Present		J1	6d_male_dpr10_VNC_55810_fruflp_1_20181023
	dpr 10 male VNC 2	6	2	11	25	11	32	87	unscorable	Present	Poor image quality	F9	6d_male_dpr10_VNC_55810_fruflp_2_20181023
	dpr 10 male VNC 3	6	0	11	14	unscorable	unscorable	67	Present	Present		D3	7d_male_dpr10_VNC_55810_fruflp_3_20190220
	dpr 10 male VNC 4	6	11	15	27	11	26	96	Present	Present		H1	7d_male_dpr10_VNC_55810_fruflp_5_20190220
	dpr 10 male VNC 5	5	2	23	17	6	17	70	Present	Present		Q8	7d_male_dpr10_VNC_55810_fruflp_6_20190220
	dpr 11 female VNC 1	5	1	24	8	11	13	62	Absent	Absent	forceps present	Q3	4-7day_dpr11gal4_fruFLP_uas_stop_mcd8gfp female VNC
	dpr 11 female VNC 2	5	2	6	8	6	8	35	Absent	Absent		Q6	4-7day_dpr11gal4_fruFLP_uas_stop_mcd8gfp female VNC 2
	dpr 11 female VNC 3	7	3	15	11	6	15	57	Absent	Absent		O6	4-7day_dpr11gal4_fruFLP_uas_stop_mcd8gfp female VNC 3
	dpr 11 female VNC 4	8	5	23	14	13	15	78	Absent	Absent		L9	4-7day_dpr11gal4_fruFLP_uas_stop_mcd8gfp female VNC 4
	dpr 11 female VNC 5	1	0	16	9	7	17	50	Absent	Absent		Q4	4-7day_dpr11gal4_fruFLP_uas_stop_mcd8gfp female VNC 5
	dpr 11 male VNC 1	8	5	47	26	11	29	126	Present	Present		I9	4-7day_dpr11gal4_fruFLP_uas_stop_mcd8gfp male VNC
	dpr 11 male VNC 2	9	2	25	14	23	13	86	Absent	Absent		K2	4-7day_dpr11gal4_fruFLP_uas_stop_mcd8gfp male VNC 2
	dpr 11 male VNC 3	4	10	28	16	21	28	107	Present	Present	Abg very dense	Q7	4-7day_dpr11gal4_fruFLP_uas_stop_mcd8gfp male VNC 3
	dpr 11 male VNC 4	unscorable	unscorable	34	15	22	25	unscorable	unscorable	unscorable	Poor image quality	J3	4-7day_dpr11gal4_fruFLP_uas_stop_mcd8gfp male VNC 4
	dpr 11 male VNC 5	3	2	19	1	5	19	49	yes (light)	yes		E2	4-7day_dpr11gal4_fruFLP_uas_stop_mcd8gfp male VNC 5
	dpr 12 female VNC 1	0	2	28	20	7	28	85	Absent	Absent		BS_B6	4-7day_dpr12gal4_fruFLP_uas_stop_mcd8gfp female VNC 3
	dpr 12 female VNC 2	9	5	16	11	7	19	67	Absent	Absent		BS_C3	4-7day_dpr12gal4_fruFLP_uas_stop_mcd8gfp female VNC
	dpr 12 female VNC 3	14	16	20	13	6	29	98	Absent	Absent		BS_D7	4-7day_dpr12gal4_fruFLP_uas_stop_mcd8gfp female VNC 2
	dpr 12 female VNC 4	4	4	16	7	6	9	46	Absent	Absent		BS_N3	4-7day_dpr12gal4_fruFLP_uas_stop_mcd8gfp female VNC 5
	dpr 12 female VNC 5	9	11	18	11	11	27	87	Absent	Absent		BS_N6	4-7day_dpr12gal4_fruFLP_uas_stop_mcd8gfp female VNC 4
	dpr 12 male VNC 1	9	12	12	15	16	29	93	Present	Present		BS_H3	4-7day_dpr12gal4_fruFLP_uas_stop_mcd8gfp male VNC 6
	dpr 12 male VNC 2	12	24	19	29	14	55	153	Present	Present		BS_H4	4-7day_dpr12gal4_fruFLP_uas_stop_mcd8gfp male VNC 5
	dpr 12 male VNC 3	7	13	26	28	17	35	126	Present	Present		BS_K5	4-7day_dpr12gal4_fruFLP_uas_stop_mcd8gfp male VNC 4
	dpr 12 male VNC 4	0	7	12	11	17	24	71	Absent	Present	Poor image quality	BS_M4	4-7day_dpr12gal4_fruFLP_uas_stop_mcd8gfp male VNC 3
	dpr 12 male VNC 5	12	34	30	35	25	46	182	Present	Present		BS_N1	4-7day_dpr12gal4_fruFLP_uas_stop_mcd8gfp male VNC
	dpr 14 female VNC 1	0	7	9	1	3	unscorable	unscorable	Absent	Absent	Poor image quality	I3	4-7daysDpr14GAL4_UASstopsmGDPmycstop_FruFLP female VNC
	dpr 14 female VNC 2	4	3	7	4	2	5	25	Absent	Absent		R4	4-7daysDpr14GAL4_UASstopsmGDPmycstop_FruFLP female VNC 2
	dpr 14 female VNC 3	3	4	14	6	6	6	39	Absent	Absent		G7	4-7daysDpr14GAL4_UASstopsmGDPmycstop_FruFLP female VNC 3
	dpr 14 female VNC 4	4	3	9	7	5	11	39	Absent	Absent		I1	4-7daysDpr14GAL4_UASstopsmGDPmycstop_FruFLP female VNC 4
	dpr 14 female VNC 5	4	0	10	4	6	3	27	Absent	Absent		F5	4-7daysDpr14GAL4_UASstopsmGDPmycstop_FruFLP female VNC 5
	dpr 14 male VNC 1	1	3	21	4	1	6	36	Present	Present		A8	4-7daysDpr14GAL4_UASstopsmGDPmycstop_FruFLP male VNC
	dpr 14 male VNC 2	1	4	15	12	1	11	44	Absent	Present		P6	4-7daysDpr14GAL4_UASstopsmGDPmycstop_FruFLP male VNC 2
	dpr 14 male VNC 3	5	0	26	11	10	14	66	Present	Present		J4	4-7daysDpr14GAL4_UASstopsmGDPmycstop_FruFLP male VNC 3
	dpr 14 male VNC 4	1	4	19	11	5	19	59	Present	Absent		F7	4-7daysDpr14GAL4_UASstopsmGDPmycstop_FruFLP male VNC 4
	dpr 14 male VNC 5	3	1	13	0	12	16	45	Present	Present		E3	4-7daysDpr14GAL4_UASstopsmGDPmycstop_FruFLP male VNC 5
	dpr 15 female VNC 1	7	8	26	5	9	17	72	Absent	Absent		E6	4-7day_dpr15gal4_fruFLP_uas_stop_mcd8gfp female VNC
	dpr 15 female VNC 2	3	7	15	2	11	12	50	Present	Present		A3	4-7day_dpr15gal4_fruFLP_uas_stop_mcd8gfp female VNC 2
	dpr 15 female VNC 3	2	5	17	13	7	13	57	Absent	Absent		A9	4-7day_dpr15gal4_fruFLP_uas_stop_mcd8gfp female VNC 3
	dpr 15 female VNC 4	3	2	21	7	9	23	65	Present	Present		A6	4-7day_dpr15gal4_fruFLP_uas_stop_mcd8gfp female VNC 4
	dpr 15 female VNC 5	6	3	16	11	8	21	65	Absent	Absent		F8	4-7day_dpr15gal4_fruFLP_uas_stop_mcd8gfp female VNC 5
	dpr 15 male VNC 1	2	5	11	5	7	unscorable	unscorable	Present	Present	Poor image quality	N4	4-7day_dpr15gal4_fruFLP_uas_stop_mcd8gfp male VNC
	dpr 15 male VNC 2	2	2	26	13	24	22	89	Present	Present		J2	4-7day_dpr15gal4_fruFLP_uas_stop_mcd8gfp male VNC 2
	dpr 15 male VNC 3	2	15	29	11	16	31	104	Present	Present	Abg very dense	P4	4-7day_dpr15gal4_fruFLP_uas_stop_mcd8gfp male VNC 3
	dpr 15 male VNC 4	1	16	22	9	16	25	89	Present	Present	very bright abg	J8	4-7day_dpr15gal4_fruFLP_uas_stop_mcd8gfp male VNC 4
	dpr 15 male VNC 5	0	0	29	21	6	23	79	Absent	Present		O9	4-7day_dpr15gal4_fruFLP_uas_stop_mcd8gfp male VNC 5
	dpr 16 female VNC 1	6	2	17	9	8	22	64	Absent	Yes? the expression makes the similar triangular shape but over the various stacks		BS_A2	4-7day_dpr16gal4_fruFLP_uas_stop_mcd8gfp female VNC 4
	dpr 16 female VNC 2	0	9	15	8	6	22	60	Absent	Absent		BS_G2	4-7day_dpr16gal4_fruFLP_uas_stop_mcd8gfp female VNC 5
	dpr 16 female VNC 3	7	11	18	5	10	16	67	Absent	Absent		BS_H6	4-7day_dpr16gal4_fruFLP_uas_stop_mcd8gfp female VNC 2
	dpr 16 female VNC 4	6	5	15	13	6	15	60	Absent	Absent		BS_M3	4-7day_dpr16gal4_fruFLP_uas_stop_mcd8gfp female VNC 3
	dpr 16 female VNC 5	5	3	5	2	6	21	42	Present	Present		BS_T6	4-7day_dpr16gal4_fruFLP_uas_stop_mcd8gfp female VNC
	dpr 16 male VNC 1	9	24	23	17	7	31	111	Present	Present		BS_D1	4-7day_dpr16gal4_fruFLP_uas_stop_mcd8gfp male VNC 4
	dpr 16 male VNC 2	7	16	15	11	11	17	77	Present	Present		BS_H9	4-7day_dpr16gal4_fruFLP_uas_stop_mcd8gfp male VNC 2
	dpr 16 male VNC 3	9	14	18	19	10	24	94	Absent	Present		BS_K8	4-7day_dpr16gal4_fruFLP_uas_stop_mcd8gfp male VNC 3
	dpr 16 male VNC 4	0	12	20	18	13	33	96	Absent	Present		BS_P2	4-7day_dpr16gal4_fruFLP_uas_stop_mcd8gfp male VNC 5
	dpr 16 male VNC 5	11	17	17	24	7	31	107	Present	Present		BS_S1	4-7day_dpr16gal4_fruFLP_uas_stop_mcd8gfp male VNC
	dpr 17 female VNC 1	3	4	18	9	4	12	50	Absent	Absent		A2	4-7day_dpr17gal4_fruFLP_uas_stop_mcd8gfp female VNC
	dpr 17 female VNC 2	5	5	12	6	10	11	49	Absent	Absent		L7	4-7day_dpr17gal4_fruFLP_uas_stop_mcd8gfp female VNC 2
	dpr 17 female VNC 3	6	2	19	7	7	11	52	Absent	Absent		Q1	4-7day_dpr17gal4_fruFLP_uas_stop_mcd8gfp female VNC 3
	dpr 17 female VNC 4	4	5	20	9	14	14	66	Absent	Absent		L3	4-7day_dpr17gal4_fruFLP_uas_stop_mcd8gfp female VNC 4
	dpr 17 female VNC 5	7	10	33	16	14	14	94	Absent	Absent		P7	4-7day_dpr17gal4_fruFLP_uas_stop_mcd8gfp female VNC 5
	dpr 17 male VNC 1	6	1	5	3	5	8	28	Absent	Present		L6	4-7day_dpr17gal4_fruFLP_uas_stop_mcd8gfp male VNC
	dpr 17 male VNC 2	3	4	3	0	0	7	17	Absent	Present	Poor image quality	R6	4-7day_dpr17gal4_fruFLP_uas_stop_mcd8gfp male VNC 2
	dpr 17 male VNC 3	7	7	15	12	7	21	69	Present	Present	Abg bright	N8	4-7day_dpr17gal4_fruFLP_uas_stop_mcd8gfp male VNC 3
	dpr 17 male VNC 4	4	8	7	7	9	13	48	Present	Present	very bright abg	K4	4-7day_dpr17gal4_fruFLP_uas_stop_mcd8gfp male VNC 4
	dpr 17 male VNC 5	3	6	19	6	8	15	57	Absent	Present		D4	4-7day_dpr17gal4_fruFLP_uas_stop_mcd8gfp male VNC 5
	dpr 18 female VNC 1	0	2	9	6	3	11	31	unscorable	Absent		BS_A1	4-7daysDpr18GAL4_UASstopsmGDPmycstop_FruFLP female VNC
	dpr 18 female VNC 2	6	9	11	5	6	14	51	Absent	Absent		BS_A4	4-7daysDpr18GAL4_UASstopsmGDPmycstop_FruFLP female VNC 4
	dpr 18 female VNC 3	7	2	9	7	13	16	54	Absent	Absent		BS_O7	4-7daysDpr18GAL4_UASstopsmGDPmycstop_FruFLP female VNC 5
	dpr 18 female VNC 4	5	6	12	8	12	14	57	Absent	Absent		BS_P9	4-7daysDpr18GAL4_UASstopsmGDPmycstop_FruFLP female VNC 3
	dpr 18 female VNC 5	6	3	15	10	7	14	55	Absent	Absent		BS_Q1	4-7daysDpr18GAL4_UASstopsmGDPmycstop_FruFLP female VNC 2
	dpr 18 male VNC 1	6	16	21	12	8	23	86	Absent	Absent		BS_C1	4-7daysDpr18GAL4_UASstopsmGDPmycstop_FruFLP male VNC 3
	dpr 18 male VNC 2	4	17	18	12	6	16	73	Present	Present		BS_E6	4-7daysDpr18GAL4_UASstopsmGDPmycstop_FruFLP male VNC 4
	dpr 18 male VNC 3	8	11	10	12	16	12	69	Absent	Present		BS_E7	4-7daysDpr18GAL4_UASstopsmGDPmycstop_FruFLP male VNC 5
	dpr 18 male VNC 4	8	4	11	7	7	18	55	Absent	Absent		BS_O6	4-7daysDpr18GAL4_UASstopsmGDPmycstop_FruFLP male VNC 2
	dpr 18 male VNC 5	5	13	24	12	12	31	97	Present	Present		BS_P1	4-7daysDpr18GAL4_UASstopsmGDPmycstop_FruFLP male VNC

## Sheet: Raw Scoring Data
A key for columns D-J is provided in 'items scored' in Read_Me sheet, with definitions for abbreviations	Abbreviated genotype	mAL neuron (present/ absent)	tritocerebral loop and/or SOG expression (present/ absent)	Lateral protocerebral complex features present/ absent (ring, arch, junction, crescent)	Antennal lobe glomeruli expression (present/ absent)	Mushroom body expression (present/ absent)	Midline Crossing in VNC (present/ absent)	Mesothoracic Triangle Neurons (present/ absent)	Internal Lab Notation: Blinded Image File name	Internal Lab Notation: Confocal Image File Name
	DIP alpha female brain 1	absent	faint loop present	none	absent	absent			K2	4d_female_DIPalpha_55810_fruflp_4_20180920
	DIP alpha female brain 2	absent	loop absent	only short arch present	absent	absent			L2	4d_female_DIPalpha_55810_fruflp_1_20180917
	DIP alpha female brain 3	absent	loop absent; U shaped neuron present	short arch only	absent	absent			P9	4d_female_DIPalpha_55810_fruflp_5_20180921
	DIP alpha female brain 4	absent	loop absent	short arch	absent	absent			Q1	4d_female_DIPalpha_55810_fruflp_2_20180918
	DIP alpha female brain 5	absent	loop present	short arch	absent	absent			Q9	4d_female_DIPalpha_55810_fruflp_3_20180919
	DIP alpha female VNC 1						present	absent	BB6	6d_female_vnc_DIPalpha_55810_fruflp_3_20181106
	DIP alpha female VNC 2						present	too faint	BB8	6d_female_vnc_DIPalpha_55810_fruflp_2_20181106
	DIP alpha female VNC 3						absent	absent	DD6	6d_female_vnc_DIPalpha_55810_fruflp_6_20181106
	DIP alpha female VNC 4						absent	absent	FF9	6d_female_vnc_DIPalpha_55810_fruflp_4_20181106
	DIP alpha female VNC 5						absent	present	GG7	6d_female_vnc_DIPalpha_55810_fruflp_5_20181106
	DIP alpha male brain 1	absent	maybe loop present?	none	absent	absent			K5	4d_male_DIPalpha_55810_fruflp_4_20180920
	DIP alpha male brain 2	absent	loop absent	short arch	absent	absent			L7	4d_male_DIPalpha_55810_fruflp_1_20180917
	DIP alpha male brain 3	absent	loop absent	none	absent	absent			M3	4d_male_DIPalpha_55810_fruflp_6_20180921
	DIP alpha male brain 4	absent	loop absent	none	absent	absent			N2	4d_male_DIPalpha_55810_fruflp_3_20180919
	DIP alpha male brain 5	absent	loop absent	none	absent	absent			N5	4d_male_DIPalpha_55810_fruflp_2_20180918
	DIP alpha male VNC 1						unscorable	absent	CC0	6d_male_vnc_DIPalpha_55810_fruflp_2_20181106
	DIP alpha male VNC 2						unscorable	absent	CC6	6d_male_vnc_DIPalpha_55810_fruflp_5_20181106
	DIP alpha male VNC 3						unscorable	unscorable	EE3	6d_male_vnc_DIPalpha_55810_fruflp_4_20181106
	DIP alpha male VNC 4						absent	absent	FF8	6d_male_vnc_DIPalpha_55810_fruflp_3_20181106
	DIP alpha male VNC 5						absent	absent	GG6	6d_male_vnc_DIPalpha_55810_fruflp_1_20181106
	DIP beta female brain 1	absent	loop absent	short arch, ring, junction, crescent present	absent	absent			K7	4-7day_DIPBetagal4_fruFLP_uas_stop_mcd8gfp female5
	DIP beta female brain 2	absent	loop absent; U shaped neuron present	thin rings, thick junction, thin arch, crescent absent	absent	absent			P0	4-7day_DIPBetagal4_fruFLP_uas_stop_mcd8gfp female1
	DIP beta female brain 3	absent	loop absent	thin rings, thin junction, thin crescent, thin arch	absent	absent			Q2	4-7day_DIPBetagal4_fruFLP_uas_stop_mcd8gfp female2
	DIP beta female brain 4	absent	loop absent	thin ring, thin junction, crescent absent, short arch	absent	absent			R0	4-7day_DIPBetagal4_fruFLP_uas_stop_mcd8gfp female3
	DIP beta female brain 5	absent	loop absent	medium rings, junction present, thin crescent, long thin arch	absent	absent			R9	4-7day_DIPBetagal4_fruFLP_uas_stop_mcd8gfp female4
	DIP beta female VNC 1						unscorable	unscorable	AA0	4-7day_DIPBetagal4_fruFLP_uas_stop_mcd8gfp female 3
	DIP beta female VNC 2						unscorable	unscorable	AA6	4-7day_DIPBetagal4_fruFLP_uas_stop_mcd8gfp female 4
	DIP beta female VNC 3						absent	absent	BB2	4-7day_DIPBetagal4_fruFLP_uas_stop_mcd8gfp female 1
	DIP beta female VNC 4						Poor image quality	Poor image quality	EE8	4-7day_DIPBetagal4_fruFLP_uas_stop_mcd8gfp female 2
	DIP beta female VNC 5						present	absent	FF6	4-7day_DIPBetagal4_fruFLP_uas_stop_mcd8gfp female 5
	DIP beta male brain 1	absent	loop present; sparse expression in SOG	thick rings, long thick arch, thick junction; crescent absent	absent	absent			J1	4-7day_DIPBetagal4_fruFLP_uas_stop_mcd8gfp male5
	DIP beta male brain 2	absent	loop present	thick ring, thick junction, thin crescent, long arch	absent	absent			M2	4-7day_DIPBetagal4_fruFLP_uas_stop_mcd8gfp male2
	DIP beta male brain 3	absent	loop absent; lots of expression in SOG	thick rings, thick junction, thin crescent, long arch	absent	absent			N0	4-7day_DIPBetagal4_fruFLP_uas_stop_mcd8gfp male1
	DIP beta male brain 4	absent	very faint loop present; lots of expression	thick rings, thick junction, thin crescent, long arch	absent	absent			Q0	4-7day_DIPBetagal4_fruFLP_uas_stop_mcd8gfp male3
	DIP beta male brain 5	absent	loop absent	thick rings, thick junction, thin crescent, long arch	absent	absent			R5	4-7day_DIPBetagal4_fruFLP_uas_stop_mcd8gfp male4
	DIP beta male VNC 1						unscorable	Poor image quality	AA4	4-7day_DIPBetagal4_fruFLP_uas_stop_mcd8gfp male VNC 4
	DIP beta male VNC 2						present	absent	CC9	4-7day_DIPBetagal4_fruFLP_uas_stop_mcd8gfp male VNC 5
	DIP beta male VNC 3						present	present	DD3	4-7day_DIPBetagal4_fruFLP_uas_stop_mcd8gfp male VNC 3
	DIP beta male VNC 4						present	present	FF4	4-7day_DIPBetagal4_fruFLP_uas_stop_mcd8gfp male VNC 1
	DIP beta male VNC 5						absent	absent	GG5	4-7day_DIPBetagal4_fruFLP_uas_stop_mcd8gfp male VNC 2
	DIP delta female brain 1	absent	loop absent	none	absent	absent			K9	6d_female_DIPdelta_55810_fruflp_6_20180926
	DIP delta female brain 2	absent	loop absent	none	absent	absent			L9	6d_female_DIPdelta_55810_fruflp_16_20180929
	DIP delta female brain 3	absent	loop absent	none	absent	absent			P3	6d_female_DIPdelta_55810_fruflp_2_20180925
	DIP delta female brain 4	absent	loop absent	none	absent	absent			P6	6d_female_DIPdelta_55810_fruflp_7_20180927
	DIP delta female brain 5	absent	loop absent	none	absent	absent			P7	6d_female_DIPdelta_55810_fruflp_15_20180928
	DIP delta female VNC 1						absent	absent	AA8	6d_female_DIPdelta_VNC_55810_fruflp_3_20190201
	DIP delta female VNC 2						absent	absent	CC5	6d_female_DIPdelta_VNC_55810_fruflp_4_20190201
	DIP delta female VNC 3						present	absent	EE4	6d_female_DIPdelta_VNC_55810_fruflp_1_20181005
	DIP delta female VNC 4						unscorable	meso	HH3	6d_female_DIPdelta_VNC_55810_fruflp_2_20181005
	DIP delta female VNC 5						absent	present	HH5	6d_female_DIPdelta_VNC_55810_fruflp_5_20190201
	DIP delta male brain 1	absent	loop absent; no expression	none	absent	absent			J0	6d_male_DIPdelta_55810_fruflp_7_20180929
	DIP delta male brain 2	absent	loop absent	none	absent	absent			L6	6d_male_DIPdelta_55810_fruflp_6_20180928
	DIP delta male brain 3	absent	loop absent	none	absent	absent			M7	6d_male_DIPdelta_55810_fruflp_2_20180925
	DIP delta male brain 4	absent	loop absent	none	absent	absent			M8	6d_male_DIPdelta_55810_fruflp_4_20180927
	DIP delta male brain 5	absent	loop absent	none	absent	absent			P2	6d_male_DIPdelta_55810_fruflp_3_20180926
	DIP delta male VNC 1						present	absent	DD8	6d_male_DIPdelta_VNC_55810_fruflp_5_20190201
	DIP delta male VNC 2						present	absent	EE5	6d_male_DIPdelta_VNC_55810_fruflp_2_20181005
	DIP delta male VNC 3						present	absent	FF2	6d_male_DIPdelta_VNC_55810_fruflp_1_20181005
	DIP delta male VNC 4						absent	absent	HH0	6d_male_DIPdelta_VNC_55810_fruflp_6_20190201
	DIP delta male VNC 5						present	present	HH6	6d_male_DIPdelta_VNC_55810_fruflp_4_20190201
	DIP epsilon female brain 1	absent	loop absent	thin rings, short arch, thin junction; crescent absent	absent	absent			J3	4-7day_DIPEpsilongal4_fruFLP_uas_stop_mcd8gfp female3
	DIP epsilon female brain 2	absent	loop absent	short arch, very thin rings, thin junction, thin crescent	absent	absent			K1	4-7day_DIPEpsilongal4_fruFLP_uas_stop_mcd8gfp female1
	DIP epsilon female brain 3	absent	loop absent	short arch, very thin rings, thin junction, crescent absent	absent	absent			L4	4-7day_DIPEpsilongal4_fruFLP_uas_stop_mcd8gfp female5
	DIP epsilon female brain 4	absent	loop absent	thin rings, thin junction, crescent absent, short arch	absent	absent			N8	4-7day_DIPEpsilongal4_fruFLP_uas_stop_mcd8gfp female2
	DIP epsilon female brain 5	absent	loop absent	thin rings, thin junction, crescent absent, short arch	absent	absent			R4	4-7day_DIPEpsilongal4_fruFLP_uas_stop_mcd8gfp female4
	DIP epsilon female VNC 1						no midline crossing	meso tri	BB1	4-7day_DIPepsilongal4_fruFLP_uas_stop_mcd8gfp female VNC 5
	DIP epsilon female VNC 2						unscorable	unscorable	BB4	4-7day_DIPepsilongal4_fruFLP_uas_stop_mcd8gfp female VNC 2
	DIP epsilon female VNC 3						present	present	FF0	4-7day_DIPepsilongal4_fruFLP_uas_stop_mcd8gfp female VNC 4
	DIP epsilon female VNC 4						present	absent	FF5	4-7day_DIPepsilongal4_fruFLP_uas_stop_mcd8gfp female VNC 3
	DIP epsilon female VNC 5						absent	absent	HH2	4-7day_DIPepsilongal4_fruFLP_uas_stop_mcd8gfp female VNC 1
	DIP epsilon male brain 1	absent	loop absent	very thin rings, short arch, thin junction, thin crescent	DA1 present	absent			K3	4-7day_DIPEpsilongal4_fruFLP_uas_stop_mcd8gfp male7
	DIP epsilon male brain 2	absent	loop present	thick rings, thick junction, crescent present, long arch	Absent	absent			L8	4-7day_DIPEpsilongal4_fruFLP_uas_stop_mcd8gfp male1
	DIP epsilon male brain 3	absent	loop absent	short arch, very thin rings, thin junction, very thin crescent	Absent	absent			M0	4-7day_DIPEpsilongal4_fruFLP_uas_stop_mcd8gfp male6
	DIP epsilon male brain 4	absent	loop absent	thin rings, thick junction, long arch, thin crescent	Absent	absent			M6	4-7day_DIPEpsilongal4_fruFLP_uas_stop_mcd8gfp male2
	DIP epsilon male brain 5	absent	loop absent	thick rings, thick junction, thin crescent, long arch	Absent	absent			N3	4-7day_DIPEpsilongal4_fruFLP_uas_stop_mcd8gfp male4
	DIP epsilon male VNC 1						unscorable	unscorable	AA2	4-7day_DIPepsilongal4_fruFLP_uas_stop_mcd8gfp male VNC 2
	DIP epsilon male VNC 2						no midline crossing	absent	AA9	4-7day_DIPepsilongal4_fruFLP_uas_stop_mcd8gfp male VNC 5
	DIP epsilon male VNC 3						present	absent	BB3	4-7day_DIPepsilongal4_fruFLP_uas_stop_mcd8gfp male VNC 1
	DIP epsilon male VNC 4						no midline crossing	absent	BB7	4-7day_DIPepsilongal4_fruFLP_uas_stop_mcd8gfp male VNC 3
	DIP epsilon male VNC 5						absent	absent	DD0	4-7day_DIPepsilongal4_fruFLP_uas_stop_mcd8gfp male VNC 4
	DIP eta female brain 1	absent	loop absent	thin rings, thin junction, thin crescent; short arch	DA1 and VA1v present	absent			J9	4d_female_DIPeta_55810_fruflp_3_20180918
	DIP eta female brain 2	absent	loop absent	only short arch present	DA1 and VA1v present	absent			K4	4d_female_DIPeta_55810_fruflp_2_20180918
	DIP eta female brain 3	present	loop absent	very thin rings, very thin junction, very thin crescent, thin arch	DA1 and VA1v present	absent			M4	6d_female_DIPeta_55810_fruflp_5_20180918
	DIP eta female brain 4	absent	loop absent	thin rings, thin junction, thin crescent, short arch	DA1 and VA1v present	absent			N4	6d_female_DIPeta_55810_fruflp_4_20180918
	DIP eta female brain 5	absent	loop absent	thin rings, thin junction, thin arch, crescent absent	DA1 and VA1v present	absent			P1	4d_female_DIPeta_55810_fruflp_1_20190313
	DIP eta female VNC 1						present	absent	AA5	6d_female_DIPeta_vnc_55810_fruflp_2_20181005
	DIP eta female VNC 2						faint	faint	DD9	4d_female_DIPeta_vnc_55810_fruflp_4_20181005
	DIP eta female VNC 3						present	present	EE6	6d_female_DIPeta_vnc_55810_fruflp_1_20181005
	DIP eta female VNC 4						absent	absent	GG8	4d_female_DIPeta_vnc_55810_fruflp_3_20181005
	DIP eta female VNC 5						absent	absent	HH7	4d_female_DIPeta_vnc_55810_fruflp_5_20181005
	DIP eta male brain 1	absent	faint loop present	very thick rings, very thick junction, long arch, thick crescent	DA1 and VA1v present	absent			J7	6d_male_DIPeta_55810_fruflp_3_20180918
	DIP eta male brain 2	present	very faint loop present	long arch, thick ring, thick junction, thin crescent	DA1 and VA1v present	absent			K6	6d_male_DIPeta_55810_fruflp_1_20180918
	DIP eta male brain 3	present	very faint loop present	thick rings, thick junction, long arch, crescent present	DA1 and VA1v present	absent			L1	6d_male_DIPeta_55810_fruflp_5_20180918
	DIP eta male brain 4	present	loop present	thick rings, thick junction, thin crescent, long arch	DA1 and VA1v present	absent			N7	6d_male_DIPeta_55810_fruflp_2_20180918
	DIP eta male brain 5	present	loop present	thick rings, thick junction, thin crescent, long arch	DA1 and VA1v present	absent			Q5	6d_male_DIPeta_55810_fruflp_4_20180918
	DIP eta male VNC 1						present	absent	AA7	6d_male_VNC_DIPeta_55810_fruflp_2_20180918
	DIP eta male VNC 2						no midline crossing	present	BB9	6d_male_VNC_DIPeta_55810_fruflp_5_20180918
	DIP eta male VNC 3						present	present	CC7	6d_male_VNC_DIPeta_55810_fruflp_4_20180918
	DIP eta male VNC 4						present	present	DD5	6d_male_VNC_DIPeta_55810_fruflp_3_20181005
	DIP eta male VNC 5						present	present	HH9	6d_male_VNC_DIPeta_55810_fruflp_7_20180918
	DIP gamma female brain 1	absent	loop absent	thin arch, thin rings, thin junction, thin crescent	Absent	present			J8	6d_female_DIPGamma_55810_fruflp_7_20180925
	DIP gamma female brain 2	absent	loop absent	thin rings, thin arch, junction absent, crescent absent	Absent	present			K0	6d_female_DIPGamma_55810_fruflp_3_20180925
	DIP gamma female brain 3	absent	loop absent	thin rings, thin junction, thin crescent, short arch	Absent	present			M5	6d_female_DIPGamma_55810_fruflp_4_20180925
	DIP gamma female brain 4	absent	loop absent	thin rings, thin junction, thin crescent, short arch	Absent	present			N6	6d_female_DIPGamma_55810_fruflp_5_20180925
	DIP gamma female brain 5	absent	loop absent	thin ring, thin junction, thin crescent, short arch	Absent	present			Q3	6d_female_DIPGamma_55810_fruflp_6_20180925
	DIP gamma female VNC 1						Poor image quality	Poor image quality	CC1	6d__female_DIPgamma_VNC_55810_fruflp_4_20180918
	DIP gamma female VNC 2						Poor image quality	present	CC4	6d__female_DIPgamma_VNC_55810_fruflp_2_20180918
	DIP gamma female VNC 3						present	present	EE1	6d__female_DIPgamma_VNC_55810_fruflp_3_20180918
	DIP gamma female VNC 4						present	present	FF1	6d__female_DIPgamma_VNC_55810_fruflp_1_20180918
	DIP gamma female VNC 5						absent	absent	GG4	7d__female_DIPgamma_VNC_55810_fruflp_5_20190220
	DIP gamma male brain 1	absent	loop present; sparse expression in SOG	thick rings, long arch, thick junction, crescent present	Absent	present			J5	6d_male_DIPGamma_55810_fruflp_4_20180918
	DIP gamma male brain 2	absent	loop present	long arch, thick rings, thick junction, crescent present	Absent	present			P8	6d_male_DIPGamma_55810_fruflp_5_20180918
	DIP gamma male brain 3	present	loop present	thick rings, thick junction, thin crescent, long arch	Absent	present			Q6	6d_male_DIPGamma_55810_fruflp_8_20180918
	DIP gamma male brain 4	absent	loop present	thin rings, thick junction, no crescent, long arch	Absent	present			R6	6d_male_DIPGamma_55810_fruflp_2_20180918
	DIP gamma male brain 5	absent	loop present	thick rings, thick junction, thin crescent, long arch	Absent	present			R8	6d_male_DIPGamma_55810_fruflp_7_20180918
	DIP gamma male VNC 1						present	present	AA3	6d__male_DIPgamma_VNC_55810_fruflp_1_20180918
	DIP gamma male VNC 2						unscorable	unscorable	BB0	6d__male_DIPgamma_VNC_55810_fruflp_2_20180918
	DIP gamma male VNC 3						unscorable	present	CC3	6d__male_DIPgamma_VNC_55810_fruflp_3_20180918
	DIP gamma male VNC 4						absent	absent	DD4	6d__male_DIPgamma_VNC_55810_fruflp_5_20180918
	DIP gamma male VNC 5						absent	absent	HH1	6d__male_DIPgamma_VNC_55810_fruflp_4_20180918
	DIP theta female brain 1	absent	loop absent	thin arch; thin rings, thick junction, thin crescent	DA1 present VA1v absent	absent			J2	4-7day_DIPThetagal4_fruFLP_uas_stop_mcd8gfp female3
	DIP theta female brain 2	absent	loop absent	thin rings, thin junction, short arch, faint crescent	DA1 present VA1v absent	absent			L5	4-7day_DIPThetagal4_fruFLP_uas_stop_mcd8gfp female4
	DIP theta female brain 3	absent	loop absent	ring present, thick junction, thin crescent, thin arch	DA1 present VA1v absent	absent			M1	4-7day_DIPThetagal4_fruFLP_uas_stop_mcd8gfp female2
	DIP theta female brain 4	present, faint	loop absent	thin rings, thick junction, thin crescent, short arch	DA1 present VA1v absent	absent			N9	4-7day_DIPThetagal4_fruFLP_uas_stop_mcd8gfp female1
	DIP theta female brain 5	absent	loop absent; lots of expression in SOG	thin rings, junction present, crescent present, thin arch	DA1 present VA1v absent	absent			P4	4-7day_DIPThetagal4_fruFLP_uas_stop_mcd8gfp female5
	DIP theta female VNC 1						unscorable	unscorable	AA1	4-7day_DIPthetagal4_fruFLP_uas_stop_mcd8gfp female VNC 1
	DIP theta female VNC 2						unscorable	absent	CC2	4-7day_DIPthetagal4_fruFLP_uas_stop_mcd8gfp female VNC 5
	DIP theta female VNC 3						absent	absent	EE2	4-7day_DIPthetagal4_fruFLP_uas_stop_mcd8gfp female VNC 3
	DIP theta female VNC 4						absent	absent	GG0	4-7day_DIPthetagal4_fruFLP_uas_stop_mcd8gfp female VNC 4
	DIP theta female VNC 5						absent	absent	GG9	4-7day_DIPthetagal4_fruFLP_uas_stop_mcd8gfp female VNC 2
	DIP theta male brain 1	present	loop present	long arch, thick rings, thick junction, crescent present	Absent	absent			K8	4-7day_DIPThetagal4_fruFLP_uas_stop_mcd8gfp male4
	DIP theta male brain 2	present	very bright loop present	thick rings, thick junction, thick crescent, long arch	Absent	absent			L3	4-7day_DIPThetagal4_fruFLP_uas_stop_mcd8gfp male3
	DIP theta male brain 3	present	loop present	long arch, thick rings, thick junction, thick crescent	Absent	absent			P5	4-7day_DIPThetagal4_fruFLP_uas_stop_mcd8gfp male2
	DIP theta male brain 4	present	loop present	thick rings, thick junction, crescent present, long arch	Absent	absent			Q7	4-7day_DIPThetagal4_fruFLP_uas_stop_mcd8gfp male1
	DIP theta male brain 5	present	loop present	thick ring, thick junction, thick crescent, long thick arch	Absent	absent			R3	4-7day_DIPThetagal4_fruFLP_uas_stop_mcd8gfp male7
	DIP theta male VNC 1						present	present	CC8	4-7day_DIPthetagal4_fruFLP_uas_stop_mcd8gfp male VNC 5
	DIP theta male VNC 2						present	present	DD1	4-7day_DIPthetagal4_fruFLP_uas_stop_mcd8gfp male VNC 7
	DIP theta male VNC 3						present	present	DD7	4-7day_DIPthetagal4_fruFLP_uas_stop_mcd8gfp male VNC 3
	DIP theta male VNC 4						present	present	EE9	4-7day_DIPthetagal4_fruFLP_uas_stop_mcd8gfp male VNC 4
	DIP theta male VNC 5						present	present	GG2	4-7day_DIPthetagal4_fruFLP_uas_stop_mcd8gfp male VNC 8
	DIP zeta female brain 1	absent	very faint loop present	thin arch, thin rings, junction and crescent present	DA1 present VA1v absent	absent			L0	4-7day_DIPZetagal4_fruFLP_uas_stop_mcd8gfp female6
	DIP zeta female brain 2	absent	loop absent	thin rings, thick junction, thin crescent, short arch	Absent	absent			M9	4-7day_DIPZetagal4_fruFLP_uas_stop_mcd8gfp female1
	DIP zeta female brain 3	absent	loop absent	thin rings, thin junction, thin crescent, short arch	Absent	absent			N1	4-7day_DIPZetagal4_fruFLP_uas_stop_mcd8gfp female2
	DIP zeta female brain 4	absent	loop absent	thin ring, thin junction, no crescent, thin arch	Absent	absent			Q4	4-7day_DIPZetagal4_fruFLP_uas_stop_mcd8gfp female4
	DIP zeta female brain 5	absent	loop absent	thin ring, thin junction, no cresent,long arch	Absent	absent			R1	4-7day_DIPZetagal4_fruFLP_uas_stop_mcd8gfp female3
	DIP zeta female VNC 1						unscorable	unscorable	BB5	4-7day_DIPzetagal4_fruFLP_uas_stop_mcd8gfp female VNC 3
	DIP zeta female VNC 2						unscorable	absent	DD2	4-7day_DIPzetagal4_fruFLP_uas_stop_mcd8gfp female VNC 2
	DIP zeta female VNC 3						absent	absent	GG3	4-7day_DIPzetagal4_fruFLP_uas_stop_mcd8gfp female VNC 4
	DIP zeta female VNC 4						present	absent	HH4	4-7day_DIPzetagal4_fruFLP_uas_stop_mcd8gfp female VNC 1
	DIP zeta female VNC 5						absent	absent	HH8	4-7day_DIPzetagal4_fruFLP_uas_stop_mcd8gfp female VNC 5
	DIP zeta male brain 1	absent	faint loop present	thick rings, long arch, thick junction, crescent absent	Absent	absent			J4	4-7day_DIPZetagal4_fruFLP_uas_stop_mcd8gfp male2
	DIP zeta male brain 2	absent	loop present	thick rings, junction absent; N/A for arch and junction bc tissue cut	Absent	absent			J6	4-7day_DIPZetagal4_fruFLP_uas_stop_mcd8gfp male4
	DIP zeta male brain 3	present	loop present	thin ring, thick junction, crescent absent, long arch	Absent	absent			Q8	4-7day_DIPZetagal4_fruFLP_uas_stop_mcd8gfp male1
	DIP zeta male brain 4	absent	loop absent	thin ring, thin junction, thin crescent, short arch	Absent	absent			R2	4-7day_DIPZetagal4_fruFLP_uas_stop_mcd8gfp male3
	DIP zeta male brain 5	absent	loop present	thick rings, thick junction, no crescent, long arch	Absent	absent			R7	4-7day_DIPZetagal4_fruFLP_uas_stop_mcd8gfp male5
	DIP zeta male VNC 1						absent	absent	EE0	4-7day_DIPzetagal4_fruFLP_uas_stop_mcd8gfp male VNC 1
	DIP zeta male VNC 2						present	present	EE7	4-7day_DIPzetagal4_fruFLP_uas_stop_mcd8gfp male VNC 4
	DIP zeta male VNC 3						unscorable	unscorable	FF3	4-7day_DIPzetagal4_fruFLP_uas_stop_mcd8gfp male VNC 2
	DIP zeta male VNC 4						absent	absent	FF7	4-7day_DIPzetagal4_fruFLP_uas_stop_mcd8gfp male VNC 5
	DIP zeta male VNC 5						present	absent	GG1	4-7day_DIPzetagal4_fruFLP_uas_stop_mcd8gfp male VNC 3
	dpr 1 female brain 1	absent	loop absent; sparse expression	thin arch, thin rings, thin junction, thin crescent	Present in both DA1 (intense) and both VA1vs	absent			I7	4-7day_dpr1gal4_fruFLP_uas_stop_mcd8gfp female
	dpr 1 female brain 2	absent	loop absent	short arch, thin rings, thin junction, crescent absent	Present in both DA1 and both VA1vs	absent			J9	4-7day_dpr1gal4_fruFLP_uas_stop_mcd8gfp female 2
	dpr 1 female brain 3	absent	very very light loop; lots of expression	short arch, thin rings, junction and crescent present	Present in both DA1 and both VA1vs	absent			F2	4-7day_dpr1gal4_fruFLP_uas_stop_mcd8gfp female 3
	dpr 1 female brain 4	absent	loop absent	short arch, thin rings, thin junction, thin crescent	Present in both DA1 and both VA1vs	absent			K8	4-7day_dpr1gal4_fruFLP_uas_stop_mcd8gfp female 4
	dpr 1 female brain 5	absent	loop absent; sparse expression	short arch, ring, junction, crescent present	Present in both DA1 and both VA1vs	absent			H6	4-7day_dpr1gal4_fruFLP_uas_stop_mcd8gfp female 5
	dpr 1 female VNC 1						absent	absent	K6	4-7day_dpr1gal4_fruFLP_uas_stop_mcd8gfp female VNC
	dpr 1 female VNC 2						absent	absent	J7	4-7day_dpr1gal4_fruFLP_uas_stop_mcd8gfp female VNC 2
	dpr 1 female VNC 3						absent	absent	H9	4-7day_dpr1gal4_fruFLP_uas_stop_mcd8gfp female VNC 3
	dpr 1 female VNC 4						absent	absent	A1	4-7day_dpr1gal4_fruFLP_uas_stop_mcd8gfp female VNC 4
	dpr 1 female VNC 5						absent	absent	O8	4-7day_dpr1gal4_fruFLP_uas_stop_mcd8gfp female VNC 5
	dpr 1 male brain 1	absent	loop present	long arch, thick rings, thick junction, thin crescent	Present in both DA1 and both VA1vs	absent			K1	4-7day_dpr1gal4_fruFLP_uas_stop_mcd8gfp male
	dpr 1 male brain 2	absent	loop present	long arch, thick rings, thick junction, crescent present	Present in both DA1 and both VA1vs	absent			K7	4-7day_dpr1gal4_fruFLP_uas_stop_mcd8gfp male 2
	dpr 1 male brain 3	absent	sparse expression; loop present	thin arch, thick rings, thick junction, crescent present	Present in both DA1 and both VA1vs	absent			D2	4-7day_dpr1gal4_fruFLP_uas_stop_mcd8gfp male 3
	dpr 1 male brain 4	absent	sparse expression, loop present	all present; extended arch	Present in both DA1 and both VA1vs	absent			B1	4-7day_dpr1gal4_fruFLP_uas_stop_mcd8gfp male 4
	dpr 1 male brain 5	absent	loop present	long, bright arch, thick rings, thick junction, thin crescent	Present in both DA1 (intense) and both VA1vs	absent			O2	4-7day_dpr1gal4_fruFLP_uas_stop_mcd8gfp male 5
	dpr 1 male VNC 1						present	present	L1	4-7day_dpr1gal4_fruFLP_uas_stop_mcd8gfp male VNC
	dpr 1 male VNC 2						present	present	H5	4-7day_dpr1gal4_fruFLP_uas_stop_mcd8gfp male VNC 2
	dpr 1 male VNC 3						present	present	P3	4-7day_dpr1gal4_fruFLP_uas_stop_mcd8gfp male VNC 3
	dpr 1 male VNC 4						present	present	M3	4-7day_dpr1gal4_fruFLP_uas_stop_mcd8gfp male VNC 4
	dpr 1 male VNC 5						present	present	C2	4-7day_dpr1gal4_fruFLP_uas_stop_mcd8gfp male VNC 5
	dpr 2 female brain 1	Present, there is lots of cell bodies above the glomeruli that can contribute to the projects that cross the brain and move down into the loop	Found the loop to be present when scrolling through the stack, it is very faint/absent in the 3D image SOG does not have a lot of expression	Yes, all the junction is very bright and congested compared to the other parts and the arch expression fade, tapers toward the junction	Present in both DA1 and both VA1vs	absent			BS_A3	4-7day_dpr2gal4_fruFLP_uas_stop_mcd8gfp female 2
	dpr 2 female brain 2	Absent	No, The loop is there (coming down from the median bundle) but don't see it become full circle though there is branching present in the SOG	Yes, all are present expression is brighter on the right side of the brain compared to the left which is very faint (confocal)	Present in both DA1 and both VA1vs	absent			BS_D5	4-7day_dpr2gal4_fruFLP_uas_stop_mcd8gfp female 5
	dpr 2 female brain 3	Absent	Loop is present but very faint and only seen when scrolling through the stacks and not in the 3D projection	Yes, all are present though the arch is thin (female-like)	Present in both DA1 and both VA1vs	absent			BS_E1	4-7day_dpr2gal4_fruFLP_uas_stop_mcd8gfp female 4
	dpr 2 female brain 4	Absent	Absent	All parts of the complex are present but more faint in expression compared to the glomeruli and the arch is think in expression(female-like)	Present in both DA1 and both VA1vs	absent			BS_Q4	4-7day_dpr2gal4_fruFLP_uas_stop_mcd8gfp female 3
	dpr 2 female brain 5	Present	Loop is present and there is branching in the SOG	All parts of the complex are present but the arch thins as it moves toward the junction (female-like)the arch is very bright in expression like the glomeruli but the ring is more faint but very much visible and is complete with the crescent	Present in both DA1 and both VA1vs	absent			BS_S7	4-7day_dpr2gal4_fruFLP_uas_stop_mcd8gfp female
	dpr 2 female VNC 1						absent	absent	BS_B2	4-7day_dpr2gal4_fruFLP_uas_stop_mcd8gfp female VNC
	dpr 2 female VNC 2						absent	absent	BS_E3	4-7day_dpr2gal4_fruFLP_uas_stop_mcd8gfp female VNC 3
	dpr 2 female VNC 3						absent	absent	BS_E9	4-7day_dpr2gal4_fruFLP_uas_stop_mcd8gfp female VNC 2
	dpr 2 female VNC 4						absent	absent	BS_O5	4-7day_dpr2gal4_fruFLP_uas_stop_mcd8gfp female VNC 5
	dpr 2 female VNC 5						absent	absent	BS_T4	4-7day_dpr2gal4_fruFLP_uas_stop_mcd8gfp female VNC 4
	dpr 2 male brain 1	Absent, while there are many cell bodies present above the glomeruli I don't believe any of them contribute to the ring in the SOG like mAL expression is shown to do	The loop is present but faint however, there are many cell bodies in the SOG area of the brain	Yes, all the parts are present the arch tapers down into the junction so the expression fades, the junction is very bright compared to the rest of the ring	Present in both DA1 and both VA1vs	absent			BS_A5	4-7day_dpr2gal4_fruFLP_uas_stop_mcd8gfp male 6
	dpr 2 male brain 2	Absent	Loop is present and only visible in the stacks (not the 3D projection) because as the expression from the median bundle project downward the expression gets more faint so once the circle meets to complex it can hardly be seen	Yes, all parts of the complex are present The arch is thick (male-like)	Present in both DA1 and both VA1vs	absent			BS_F1	4-7day_dpr2gal4_fruFLP_uas_stop_mcd8gfp male 2
	dpr 2 male brain 3	Present	Loop is present	All parts of the complex are present, the arch, junction, and ring are thicker in expression all parts are even in expression levels which is bright	Present in both DA1 and both VA1vs	absent			BS_O8	4-7day_dpr2gal4_fruFLP_uas_stop_mcd8gfp male 5
	dpr 2 male brain 4	Absent	Loop is present	All parts of the complex are present and thick and bright in expression	Present in both DA1 and both VA1vs	absent			BS_P4	4-7day_dpr2gal4_fruFLP_uas_stop_mcd8gfp male 3
	dpr 2 male brain 5	Absent	Loop is present	Yes, the all the parts of the complex are present the arch is thick in expression (male-like)	Present in both DA1 and both VA1vs	absent			BS_Q6	4-7day_dpr2gal4_fruFLP_uas_stop_mcd8gfp male
	dpr 2 male VNC 1						present	present	BS_B1	4-7day_dpr2gal4_fruFLP_uas_stop_mcd8gfp male VNC
	dpr 2 male VNC 2						absent	absent	BS_C4	4-7day_dpr2gal4_fruFLP_uas_stop_mcd8gfp male VNC 4
	dpr 2 male VNC 3						present	present	BS_M5	4-7day_dpr2gal4_fruFLP_uas_stop_mcd8gfp male VNC 3
	dpr 2 male VNC 4						present	present	BS_O9	4-7day_dpr2gal4_fruFLP_uas_stop_mcd8gfp male VNC 5
	dpr 2 male VNC 5						present	present	BS_R7	4-7day_dpr2gal4_fruFLP_uas_stop_mcd8gfp male VNC 2
	dpr 3 female brain 1	absent	loop absent; 2 large cell bodies at bottom of SOG	short arch, thin rings, junction, crescent present	Present in both DA1 and both VA1vs	absent			H2	4-7day_dpr3gal4_fruFLP_uas_stop_mcd8gfp female
	dpr 3 female brain 2	absent	loop absent	short arch, thin rings, thick junction, crescent present	Present in both DA1 and both VA1vs	absent			I8	4-7day_dpr3gal4_fruFLP_uas_stop_mcd8gfp female 2
	dpr 3 female brain 3	absent	loop absent	short arch, thin rings, thin junction, thin crescent	Present in both DA1 and both VA1vs	absent			L8	4-7day_dpr3gal4_fruFLP_uas_stop_mcd8gfp female 3
	dpr 3 female brain 4	absent	loop absent; sparse expression	short arch, thin rings, thin junction, thin crescent	Present in both DA1 and both VA1vs	absent			N3	4-7day_dpr3gal4_fruFLP_uas_stop_mcd8gfp female 4
	dpr 3 female brain 5	absent	sparse expression; loop absent	thin arch, ring present, junction and crescent absent	Present in both DA1 and both VA1vs	absent			D5	4-7day_dpr3gal4_fruFLP_uas_stop_mcd8gfp female 5
	dpr 3 female VNC 1						absent	absent	L2	4-7day_dpr3gal4_fruFLP_uas_stop_mcd8gfp female VNC
	dpr 3 female VNC 2						absent	absent	M2	4-7day_dpr3gal4_fruFLP_uas_stop_mcd8gfp female VNC 2
	dpr 3 female VNC 3						absent	absent	G6	4-7day_dpr3gal4_fruFLP_uas_stop_mcd8gfp female VNC 3
	dpr 3 female VNC 4						absent	absent	M6	4-7day_dpr3gal4_fruFLP_uas_stop_mcd8gfp female VNC 4
	dpr 3 female VNC 5						absent	absent	F1	4-7day_dpr3gal4_fruFLP_uas_stop_mcd8gfp female VNC 5
	dpr 3 male brain 1	absent	very very light loop	long arch, thick rings, thick junction, long crescent	Present in both DA1 and both VA1vs	absent			D9	4-7day_dpr3gal4_fruFLP_uas_stop_mcd8gfp male
	dpr 3 male brain 2	absent	very faint loop present; not much expression	long thick arch, thick rings, thick junction, crescent present	Absent	absent			R1	4-7day_dpr3gal4_fruFLP_uas_stop_mcd8gfp male 2
	dpr 3 male brain 3	absent	loop present	brain ripped so can't see arch; ring, crescent, junction present	Absent	absent			G8	4-7day_dpr3gal4_fruFLP_uas_stop_mcd8gfp male 3
	dpr 3 male brain 4	absent	very faint loop present	long arch, all present	Absent	absent			E9	4-7day_dpr3gal4_fruFLP_uas_stop_mcd8gfp male 4
	dpr 3 male brain 5	absent	loop absent; lots of expression in SOG	long arch, thin rings, thick junction, thin crescent	Absent	absent			N7	4-7day_dpr3gal4_fruFLP_uas_stop_mcd8gfp male 5
	dpr 3 male VNC 1						present	absent	C5	4-7day_dpr3gal4_fruFLP_uas_stop_mcd8gfp male VNC
	dpr 3 male VNC 2						present	absent	A4	4-7day_dpr3gal4_fruFLP_uas_stop_mcd8gfp male VNC 2
	dpr 3 male VNC 3						present	present	I5	4-7day_dpr3gal4_fruFLP_uas_stop_mcd8gfp male VNC 3
	dpr 3 male VNC 4						present	present	F4	4-7day_dpr3gal4_fruFLP_uas_stop_mcd8gfp male VNC 4
	dpr 3 male VNC 5						present	absent	H4	4-7day_dpr3gal4_fruFLP_uas_stop_mcd8gfp male VNC 5
	dpr 4 female brain 1	Absent	Loop is very faint branching is present in the SOG	The arch of the complex is present but it is hard to see if the ring or crescent are present because all the expression in the middle of the brain are very faint and there is a lot of background in this brain image	Present in both DA1 and both VA1vs	present			BS_M7	4-7daysDpr4GAL4_UASstopsmGDPmycstop_FruFLP female
	dpr 4 female brain 2	Absent	There is no loop but there is faint expression/branching in the SOG	No, the arch is present but the junction and crescent is missing and the ring isn't complete there also seems to be a "ring" in the brain that is too high to be the ring of the lateral protocerebral complex	Present in both DA1 and both VA1vs	present			BS_B3	4-7daysDpr4GAL4_UASstopsmGDPmycstop_FruFLP female 5
	dpr 4 female brain 3	Absent	I don't believe the loop is present the expression from the median bundle neurons definitely project downwards into the SOG but I don't think it creates the loop but it does(?) contribute to the SOG expression which is branching in the bottom of the brain	Yes, all the parts of the complex are present but all are very faint in expression	Present in both DA1 and both VA1vs	present			BS_B7	4-7daysDpr4GAL4_UASstopsmGDPmycstop_FruFLP female 2
	dpr 4 female brain 4	Absent	there is a very small loop from the median bundle neurons but it is very faint and not very low in the SOG in the 3D projection there is visible branching in the SOG at the bottom	No, the arch is present but faint in expression (female-like) there is an additional ring above where the typical ring is and the ring is very faint hard to see and does not have the crescent	Present in both DA1 and both VA1vs	present			BS_C5	4-7daysDpr4GAL4_UASstopsmGDPmycstop_FruFLP female 4
	dpr 4 female brain 5	Absent	Loop is present and there is additional branching in the SOG	Yes, all parts of the complex are present HOWEVER, the ring is very faint and there is an additional "ring" on top of the ring that is the ring of the complex	Present in both DA1 and both VA1vs	present			BS_H5	4-7daysDpr4GAL4_UASstopsmGDPmycstop_FruFLP female 3
	dpr 4 female VNC 1						present	present	BS_J4	4-7daysDpr4GAL4_UASstopsmGDPmycstop_FruFLP female VNC 4
	dpr 4 female VNC 2						absent	absent	BS_J5	4-7daysDpr4GAL4_UASstopsmGDPmycstop_FruFLP female VNC 7
	dpr 4 female VNC 3						present	absent	BS_O4	4-7daysDpr4GAL4_UASstopsmGDPmycstop_FruFLP female VNC 5
	dpr 4 female VNC 4						absent	absent	BS_Q7	4-7daysDpr4GAL4_UASstopsmGDPmycstop_FruFLP female VNC 3
	dpr 4 female VNC 5						absent	absent	BS_T2	4-7daysDpr4GAL4_UASstopsmGDPmycstop_FruFLP female VNC 6
	dpr 4 male brain 1	Absent	The loop is present	Yes, all the parts of the complex are present the arch is the brightest (thick-male like) and into the junction is bright but the ring and crescent are more faint in comparison and the crescent expression seems elongated	Absent	present			BS_C2	4-7daysDpr4GAL4_UASstopsmGDPmycstop_FruFLP male 6
	dpr 4 male brain 2	Absent	Loop is present in the SOG	Yes, all the features of the complex are present the arch is thick (male-like) and the junction is the brightest the ring and crescent are fainter in expression(in comparison)	Present in both DA1 and both VA1vs	present			BS_F7	4-7daysDpr4GAL4_UASstopsmGDPmycstop_FruFLP male
	dpr 4 male brain 3	Present	Loop is present and thick and bright in expression	All parts of the complex are present and thick and bright in expression (male-like)	Present in both DA1 and both VA1vs	present			BS_M9	4-7daysDpr4GAL4_UASstopsmGDPmycstop_FruFLP male 3
	dpr 4 male brain 4	Present	Loop is present in the SOG along with some branching	All the parts of the complex are present but faint in expression compared to the mushroom body	Present in both DA1 and both VA1vs	present			BS_N7	4-7daysDpr4GAL4_UASstopsmGDPmycstop_FruFLP male 4
	dpr 4 male brain 5	Absent	Loop is present	all the parts of the complex are present the arch tapers down into the junction (female-like) the ring and crescent are fainter in expression compared to the mushroom body expression the arch and junction	DA1 present on one side	present			BS_R4	4-7daysDpr4GAL4_UASstopsmGDPmycstop_FruFLP male 5
	dpr 4 male VNC 1						present	present	BS_B8	4-7daysDpr4GAL4_UASstopsmGDPmycstop_FruFLP male VNC 4
	dpr 4 male VNC 2						present	present	BS_C7	4-7daysDpr4GAL4_UASstopsmGDPmycstop_FruFLP male VNC 6
	dpr 4 male VNC 3						absent	present	BS_G8	4-7daysDpr4GAL4_UASstopsmGDPmycstop_FruFLP male VNC 5
	dpr 4 male VNC 4						present	present	BS_J6	4-7daysDpr4GAL4_UASstopsmGDPmycstop_FruFLP male VNC 3
	dpr 4 male VNC 5						present	present	BS_P5	4-7daysDpr4GAL4_UASstopsmGDPmycstop_FruFLP male VNC
	dpr 5 female brain 1	Absent	Loop is present but very faint in both the stacks and the 3D projection	Yes, Present but very faint	DA1 present VA1v absent	present			BS_E4	6d_female_dpr5_55810_fruflp_3_20180919
	dpr 5 female brain 2	Absent	Loop present but very faint	All parts are present HOWEVER all but the junction is very very faint	DA1 present VA1v absent	present			BS_H7	6d_female_dpr5_55810_fruflp_6_20180919
	dpr 5 female brain 3	Absent	No loop is present some branching in the SOG but also there is a cut in the brain in the SOG separating it	Yes, all present all faint but the junction	DA1 present VA1v absent	present			BS_K3	6d_female_dpr5_55810_fruflp_4_20180919
	dpr 5 female brain 4	Absent	Absent	Not all the parts of the complex are present, the arch is seen faintly tapering towards the junction which is bright but it is hard to see a completed ring or crescent	DA1 present VA1v absent	present			BS_Q8	6d_female_dpr5_55810_fruflp_5_20180919
	dpr 5 female brain 5	Absent	Loop is absent	All the parts of the complex are present but the arch and ring are very thin in expression (female-like) also very faint in expression level compared to the mushroom body	DA1 present VA1v absent	present			BS_R8	6d_female_dpr5_55810_fruflp_7.1_20180919
	dpr 5 female VNC 1						absent	absent	BS_F8	6d_female_dpr5_VNC_55810_fruflp_5_20181002
	dpr 5 female VNC 2						absent	absent	BS_K4	6d_female_dpr5_VNC_55810_fruflp_2_20181002
	dpr 5 female VNC 3						absent	absent	BS_O3	6d_female_dpr5_VNC_55810_fruflp_7_20181002
	dpr 5 female VNC 4						absent	absent	BS_P3	6d_female_dpr5_VNC_55810_fruflp_6_20181002
	dpr 5 female VNC 5						absent	absent	BS_S2	6d_female_dpr5_VNC_55810_fruflp_4_20181002
	dpr 5 male brain 1	Absent	Yes loop is present	Yes, all though the expression is more faint	DA1 present VA1v absent	present			BS_C9	6d_male_dpr5_55810_fruflp_5_20180919
	dpr 5 male brain 2	Absent	Loop is present	Yes, Present but very faint	DA1 present VA1v absent	present			BS_E5	6d_male_dpr5_55810_fruflp_4_20180919
	dpr 5 male brain 3	Absent	Loop is absent	Yes, all present/faint	DA1 present VA1v absent	present			BS_J2	6d_male_dpr5_55810_fruflp_1_20180919
	dpr 5 male brain 4	Present	Loop present	Yes, all present but very faint	DA1 present VA1v absent	present			BS_J8	6d_male_dpr5_55810_fruflp_2_20180919
	dpr 5 male brain 5	Absent	Loop is present in the SOG but faint in expression similar to how the complex was faint in expression compared to the mushroom body where it is hard to make out the completed circle	All the parts of the complex are present (male-like) but the expression is very faint compared to the mushroom body expression	DA1 present VA1v absent	present			BS_N4	6d_male_dpr5_55810_fruflp_3_20180919
	dpr 5 male VNC 1						present	present	BS_A6	7d_male_dpr5_VNC_55810_fruflp_5_20190218
	dpr 5 male VNC 2						present	present	BS_F4	7d_male_dpr5_VNC_55810_fruflp_4_20190218
	dpr 5 male VNC 3						present	present	BS_J3	6d_male_dpr5_VNC_55810_fruflp_2_20181002
	dpr 5 male VNC 4						present	present	BS_Q3	6d_male_dpr5_VNC_55810_fruflp_1_20181002
	dpr 5 male VNC 5						present	present	BS_Q5	6d_male_dpr5_VNC_55810_fruflp_3_20181002
	dpr 6 female brain 1	Absent	Loop is present	Yes, all the parts of the complex are present arch tapers down into the junction (female-like?)	Absent	absent			BS_D2	4-7day_dpr6gal4_fruFLP_uas_stop_mcd8gfp female 4
	dpr 6 female brain 2	Absent	Loop is present but very faint and only seen when scrolling through the stacks and not in the 3D projection, there is branching in the SOG	Yes, all are present though the arch is thin (female-like)	Absent	absent			BS_E2	4-7day_dpr6gal4_fruFLP_uas_stop_mcd8gfp female 3
	dpr 6 female brain 3	Absent	Loop present but very faint	Yes, all present(female-like)	Absent	absent			BS_H8	4-7day_dpr6gal4_fruFLP_uas_stop_mcd8gfp female 5
	dpr 6 female brain 4	Absent	A small loop is present in the SOG connecting the midline expression together mostly branching expression is visible in the SOG	Yes, all parts of the complex are present the arch expression thins in expression as it tapers down towards the junction	Absent	absent			BS_N9	4-7day_dpr6gal4_fruFLP_uas_stop_mcd8gfp female
	dpr 6 female brain 5	Absent	Loop is present but very faint in expression there is also branching in the SOG	Thick arch expression (male-like) as it moves toward the junction which is larger in surface area. The ring and crescent are present but the crescent extends further down the brain than typical. All parts of the same expression level (brightness)	Absent	absent			BS_T3	4-7day_dpr6gal4_fruFLP_uas_stop_mcd8gfp female 2
	dpr 6 female VNC 1						absent	absent	BS_D3	4-7day_dpr6gal4_fruFLP_uas_stop_mcd8gfp female VNC 3
	dpr 6 female VNC 2						absent	absent	BS_D8	4-7day_dpr6gal4_fruFLP_uas_stop_mcd8gfp female VNC 7
	dpr 6 female VNC 3						absent	absent	BS_G1	4-7day_dpr6gal4_fruFLP_uas_stop_mcd8gfp female VNC
	dpr 6 female VNC 4						absent	absent	BS_G4	4-7day_dpr6gal4_fruFLP_uas_stop_mcd8gfp female VNC 4
	dpr 6 female VNC 5						absent	absent	BS_G9	4-7day_dpr6gal4_fruFLP_uas_stop_mcd8gfp female VNC 6
	dpr 6 male brain 1	unscorable	Present	Yes all are present the arch is very thick (male-like) the junction is very bright and the ring is very thick and bright the most dense complex we have seen	Absent	absent			BS_F5	4-7day_dpr6gal4_fruFLP_uas_stop_mcd8gfp male 5
	dpr 6 male brain 2	Present	Loop is present	Yes, all the features of the complex are present the arch is thick (male-like) and the junction is the brightest the ring and crescent are fainter in expression(in comparison)	Absent	absent			BS_F9	4-7day_dpr6gal4_fruFLP_uas_stop_mcd8gfp male 3
	dpr 6 male brain 3	Present	Loop is present	All the parts of the complex are present the junction has the brightest expression pattern compared to the rest of the complex the complex expression is thick (male-like)	Absent	absent			BS_R3	4-7day_dpr6gal4_fruFLP_uas_stop_mcd8gfp male 4
	dpr 6 male brain 4	Present	Loop is present	All the parts of the complex are present(male-like) the arch is thick in expression as it moves to the junction which is bright in expression (similar to the arch but brighter than the ring and crescent)	Absent	absent			BS_R6	4-7day_dpr6gal4_fruFLP_uas_stop_mcd8gfp male 7
	dpr 6 male brain 5	Present	Present	All parts of the complex are present the arch is thick in expression as it moves to the junction and the ring and crescent which are all bright and thick in expression	Absent	absent			BS_S4	4-7day_dpr6gal4_fruFLP_uas_stop_mcd8gfp male 2
	dpr 6 male VNC 1						absent	present	BS_A7	4-7day_dpr6gal4_fruFLP_uas_stop_mcd8gfp male VNC 4
	dpr 6 male VNC 2						present	present	BS_F6	4-7day_dpr6gal4_fruFLP_uas_stop_mcd8gfp male VNC 3
	dpr 6 male VNC 3						absent	absent	BS_K2	4-7day_dpr6gal4_fruFLP_uas_stop_mcd8gfp male VNC
	dpr 6 male VNC 4						present	present	BS_O1	4-7day_dpr6gal4_fruFLP_uas_stop_mcd8gfp male VNC 5
	dpr 6 male VNC 5						present	present	BS_P8	4-7day_dpr6gal4_fruFLP_uas_stop_mcd8gfp male VNC 2
	dpr 8 female brain 1	absent	loop absent	short arch, thin rings, thin junction, thin crescent	Present in both DA1 and both VA1vs	present			K9	4-7day_dpr8gal4_fruFLP_uas_stop_mcd8gfp female
	dpr 8 female brain 2	absent	loop absent; lots of expression and large cell body at bottom	thin rings, thin arch, junction present, crescent absent	Present in both DA1 and both VA1vs	present			P2	4-7day_dpr8gal4_fruFLP_uas_stop_mcd8gfp female 2
	dpr 8 female brain 3	absent	loop absent; not much expression	short arch, thin rings, thin junction, crescent absent	Present in both DA1 and both VA1vs	present			Q9	4-7day_dpr8gal4_fruFLP_uas_stop_mcd8gfp female 3
	dpr 8 female brain 4	absent	loop absent	short arch, ring, junction, crescent present	Present in both DA1 and both VA1vs	present			B2	4-7day_dpr8gal4_fruFLP_uas_stop_mcd8gfp female 4
	dpr 8 female brain 5	absent	loop absent	all present but thin and light; arch very thin and short	Present in both DA1 and both VA1vs	present			B4	4-7day_dpr8gal4_fruFLP_uas_stop_mcd8gfp female 5
	dpr 8 female VNC 1						absent	absent	M5	4-7day_dpr8gal4_fruFLP_uas_stop_mcd8gfp female VNC
	dpr 8 female VNC 2						absent	absent	O7	4-7day_dpr8gal4_fruFLP_uas_stop_mcd8gfp female VNC 2
	dpr 8 female VNC 3						absent	absent	D1	4-7day_dpr8gal4_fruFLP_uas_stop_mcd8gfp female VNC 3
	dpr 8 female VNC 4						absent	very very faint	G3	4-7day_dpr8gal4_fruFLP_uas_stop_mcd8gfp female VNC 4
	dpr 8 female VNC 5						absent	absent	C4	4-7day_dpr8gal4_fruFLP_uas_stop_mcd8gfp female VNC 5
	dpr 8 male brain 1	absent	loop present	all present; extended arch	Absent	present			B3	4-7day_dpr8gal4_fruFLP_uas_stop_mcd8gfp male
	dpr 8 male brain 2	absent	loop present	long arch, thick ring, thick junction, crescent	Absent	present			D7	4-7day_dpr8gal4_fruFLP_uas_stop_mcd8gfp male 2
	dpr 8 male brain 3	absent	loop present	long arch, ring present, thick junction, crescent present	Absent	present			M8	4-7day_dpr8gal4_fruFLP_uas_stop_mcd8gfp male 3
	dpr 8 male brain 4	present	loop present	all present; long arch, thick junction	Absent	present			D6	4-7day_dpr8gal4_fruFLP_uas_stop_mcd8gfp male 4
	dpr 8 male brain 5	absent	loop present	thin arch, thin rings, junction present, very thin crescent	DA1 present VA1v absent	present			H8	4-7day_dpr8gal4_fruFLP_uas_stop_mcd8gfp male 5
	dpr 8 male VNC 1						present	present	G4	4-7day_dpr8gal4_fruFLP_uas_stop_mcd8gfp male VNC
	dpr 8 male VNC 2						present	absent	A7	4-7day_dpr8gal4_fruFLP_uas_stop_mcd8gfp male VNC 2
	dpr 8 male VNC 3						unscorable	present	P1	4-7day_dpr8gal4_fruFLP_uas_stop_mcd8gfp male VNC 3
	dpr 8 male VNC 4						present	present	A5	4-7day_dpr8gal4_fruFLP_uas_stop_mcd8gfp male VNC 4
	dpr 8 male VNC 5						present	present	N9	4-7day_dpr8gal4_fruFLP_uas_stop_mcd8gfp male VNC 5
	dpr 9 female brain 1	Absent, there are no cell bodies above the glomeruli to contribute to the crossing over or the loop which also seem absent or faint	The loop is no obviously present when looking at the 3D projection when looking through the stacks it is very very faint but it can see seen in the SOG, a circle coming from the median bundle neurons	Yes, all the parts of the complex are present. The arch is think in expression as it tapers down to the junction which is brighter and slightly more dense(organized) on the right side compared to the left	Present in both DA1 and both VA1vs	present			BS_A8	4-7day_dpr9gal4_fruFLP_uas_stop_mcd8gfp female 3
	dpr 9 female brain 2	Absent	Absent	Yes, all arch is thin	Present in both DA1 and both VA1vs	present			BS_F3	4-7day_dpr9gal4_fruFLP_uas_stop_mcd8gfp female 5
	dpr 9 female brain 3	Absent	Very faint loop mostly made of branching in the SOG	Yes, all parts present looks male like in the 3D (thick) but female like in the stacks (thins)	Present in both DA1 and both VA1vs	present			BS_K6	4-7day_dpr9gal4_fruFLP_uas_stop_mcd8gfp female 4
	dpr 9 female brain 4	Absent	Very faint can only be seen in the stacks	Yes all parts of the complex are present there is a cut in the top left side of the brain so it is hard to draw conclusions about the arch but all are present	Present in both DA1 and both VA1vs	present			BS_R1	4-7day_dpr9gal4_fruFLP_uas_stop_mcd8gfp female 2
	dpr 9 female brain 5	Absent	The loop is very faint in expression so it is only seen in the stacks when scrolling through not in the 3D image	Yes, all the parts of the complex are present the arch tapers down in expression as it gets to the junction very female like the junction is very bright in expression and very large, in the 3D image and when scrolling through the stacks there looks like there is a "ring" present above the ring of the lateral protocerebral complex which is present so the top part of that ring of the complex is ver…	DA1 present VA1v absent	absent			BS_B5	4-7day_dpr9gal4_fruFLP_uas_stop_mcd8gfp female
	dpr 9 female VNC 1						absent	absent	BS_C6	4-7day_dpr9gal4_fruFLP_uas_stop_mcd8gfp female VNC 3
	dpr 9 female VNC 2						absent	absent	BS_H1	4-7day_dpr9gal4_fruFLP_uas_stop_mcd8gfp female VNC
	dpr 9 female VNC 3						absent	absent	BS_N5	4-7day_dpr9gal4_fruFLP_uas_stop_mcd8gfp female VNC 2
	dpr 9 female VNC 4						absent	absent	BS_R2	4-7day_dpr9gal4_fruFLP_uas_stop_mcd8gfp female VNC 5
	dpr 9 female VNC 5						absent	absent	BS_R9	4-7day_dpr9gal4_fruFLP_uas_stop_mcd8gfp female VNC 4
	dpr 9 male brain 1	present	the loop is present and very thick and bright in expression it can easily be found when looking through the stacks or at the 3D projection	Yes, all the parts are present the junction is very bright in this brain as the expression comes down from the arch and into the ring the arch is thicker on one side of the brain as it tapers down to the junction which is male like though the other side thins, tapers down	Present in both DA1 and both VA1vs	absent			BS_B4	4-7day_dpr9gal4_fruFLP_uas_stop_mcd8gfp male 3
	dpr 9 male brain 2	Present	Yes	Yes, all the complex is present very bright in expression	DA1 present VA1v absent	absent			BS_D6	4-7day_dpr9gal4_fruFLP_uas_stop_mcd8gfp male 2
	dpr 9 male brain 3	Present	Present	Yes, all present (male-like)	Present in both DA1 and both VA1vs	present			BS_G6	4-7day_dpr9gal4_fruFLP_uas_stop_mcd8gfp male 4
	dpr 9 male brain 4	Absent	Present	All the parts of the complex are present the arch is thick in expression (male-like) the ring and crescent are present the expression level is more faint compared to the mushroom body but very much visible still	DA1 present VA1v absent	present			BS_S5	4-7day_dpr9gal4_fruFLP_uas_stop_mcd8gfp male 7
	dpr 9 male brain 5	Absent	Present	The arch is very thick in expression as it moves down towards the junction (male-like) the junction is also large in expression (both the arch and the junction are faint in expression compared tot he mushroom body but very much visible) but the ring and crescent are very faint in expression where its hard to see if the ring completes and if the crescent is present	DA1 present VA1v absent	present			BS_S6	4-7day_dpr9gal4_fruFLP_uas_stop_mcd8gfp male 8
	dpr 9 male VNC 1						present	present	BS_G5	4-7day_dpr9gal4_fruFLP_uas_stop_mcd8gfp male VNC 4
	dpr 9 male VNC 2						No, moves from the center to the outside	No	BS_J7	4-7day_dpr9gal4_fruFLP_uas_stop_mcd8gfp male VNC
	dpr 9 male VNC 3						present	present	BS_M6	4-7day_dpr9gal4_fruFLP_uas_stop_mcd8gfp male VNC 5
	dpr 9 male VNC 4						present	absent	BS_P7	4-7day_dpr9gal4_fruFLP_uas_stop_mcd8gfp male VNC 2
	dpr 9 male VNC 5						present	present	BS_Q9	4-7day_dpr9gal4_fruFLP_uas_stop_mcd8gfp male VNC 3
	dpr 10 female brain 1	absent	loop absent; sparse expression	thin arch, thin rings, thick junction, no crescent	DA1 present VA1v absent	present			L4	4d_female_dpr10_55810_fruflp_1_20180917
	dpr 10 female brain 2	absent	very very light loop present; sparse expression	all present but very thin	Present in both DA1 and both VA1vs	present			E4	4d_female_dpr10_55810_fruflp_2_20180917
	dpr 10 female brain 3	absent	loop absent; not much expression	thin arch, thin rings, thin junction, crescent absent	DA1 present VA1v absent	present			Q2	4d_female_dpr10_55810_fruflp_3_20180917
	dpr 10 female brain 4	absent	loop absent	thin arch, thin rings, no junction, no crescent	DA1 present VA1v absent	present			M1	4d_female_dpr10_55810_fruflp_4_20180917
	dpr 10 female brain 5	absent	loop absent; not much expression	very faint light rings, thin junction, no crescent, can't score arch bc brain ripped at top	DA1 present VA1v absent	present			Q5	6d_female_dpr10_55810_fruflp_5_20180918
	dpr 10 female VNC 1						absent	absent	P5	6d_female_dpr10_VNC_55810_fruflp_1_20181005
	dpr 10 female VNC 2						absent	absent	N6	6d_female_dpr10_VNC_55810_fruflp_2_20181005
	dpr 10 female VNC 3						absent	absent	M4	6d_female_dpr10_VNC_55810_fruflp_3_20181005
	dpr 10 female VNC 4						present	absent	J5	7d_female_dpr10_VNC_55810_fruflp_5_20190220
	dpr 10 female VNC 5						absent	absent	E8	7d_female_dpr10_VNC_55810_fruflp_6_20190220
	dpr 10 male brain 1	absent	sparse expression; loop present	all present (extended arch)	Absent	present			B8	4d_male_dpr10_55810_fruflp_1_20180917
	dpr 10 male brain 2	absent	loop present	thin arch, thin rings, crescent, junction present	Absent	present			H7	4d_male_dpr10_55810_fruflp_2_20180917
	dpr 10 male brain 3	absent	loop present	long arch, ring and crescent present; thick junction	Absent	present			I2	7d_male_dpr10_55810_fruflp_4_20190217
	dpr 10 male brain 4	absent	sparse expression; loop present	all present (extended arch; light rings)	Absent	present			B9	7d_male_dpr10_55810_fruflp_5_20190217
	dpr 10 male brain 5	absent	loop present	long arch, junction present	Absent	present			F3	7d_male_dpr10_55810_fruflp_6_20190217
	dpr 10 male VNC 1						present	present	J1	6d_male_dpr10_VNC_55810_fruflp_1_20181023
	dpr 10 male VNC 2						unscorable	present	F9	6d_male_dpr10_VNC_55810_fruflp_2_20181023
	dpr 10 male VNC 3						present	present	D3	7d_male_dpr10_VNC_55810_fruflp_3_20190220
	dpr 10 male VNC 4						present	present	H1	7d_male_dpr10_VNC_55810_fruflp_5_20190220
	dpr 10 male VNC 5						present	present	Q8	7d_male_dpr10_VNC_55810_fruflp_6_20190220
	dpr 11 female brain 1	absent	loop absent	short arch, thin rings, thin junction, thin crescent	Present in both DA1 and both VA1vs	absent			O4	4-7day_dpr11gal4_fruFLP_uas_stop_mcd8gfp female
	dpr 11 female brain 2	absent	sparse expression; loop absent	very thin arch, rings, junction, crescent	Present in both VA1vs absent in DA1	absent			C8	4-7day_dpr11gal4_fruFLP_uas_stop_mcd8gfp female 2
	dpr 11 female brain 3	absent	loop absent; large cell body at bottom of SOG; lots of expression	short arch; thin rings, junction and crescent present	Present in both DA1 (intense) and both VA1vs				H3	4-7day_dpr11gal4_fruFLP_uas_stop_mcd8gfp female 3
	dpr 11 female brain 4	absent	loop absent	short arch, thin rings, thin junction, thin crescent	Present in both DA1 (intense) and both VA1vs	absent			N5	4-7day_dpr11gal4_fruFLP_uas_stop_mcd8gfp female 4
	dpr 11 female brain 5	absent	loop absent; not much expression	short arch, thin rings, thin junction, thin crescent	Present in both DA1 (intense) and both VA1vs	absent			R3	4-7day_dpr11gal4_fruFLP_uas_stop_mcd8gfp female 5
	dpr 11 female VNC 1						absent	absent	Q3	4-7day_dpr11gal4_fruFLP_uas_stop_mcd8gfp female VNC
	dpr 11 female VNC 2						absent	absent	Q6	4-7day_dpr11gal4_fruFLP_uas_stop_mcd8gfp female VNC 2
	dpr 11 female VNC 3						absent	absent	O6	4-7day_dpr11gal4_fruFLP_uas_stop_mcd8gfp female VNC 3
	dpr 11 female VNC 4						absent	absent	L9	4-7day_dpr11gal4_fruFLP_uas_stop_mcd8gfp female VNC 4
	dpr 11 female VNC 5						absent	absent	Q4	4-7day_dpr11gal4_fruFLP_uas_stop_mcd8gfp female VNC 5
	dpr 11 male brain 1	present	cell bodies in SOG (loop present)	long arch; thick rings, thick junction, long thick crescent	Present in both DA1 (intense) and both VA1vs	absent			E1	4-7day_dpr11gal4_fruFLP_uas_stop_mcd8gfp male
	dpr 11 male brain 2	present	loop present (very bright)	long arch, thick rings, thick junction, thin crescent	Present in both DA1 (intense) and both VA1vs	absent			N2	4-7day_dpr11gal4_fruFLP_uas_stop_mcd8gfp male 2
	dpr 11 male brain 3	absent	loop present;	thick rings, thick junction, crescent present, long thick arch	Present in both DA1 (intense) and both VA1vs	absent			P8	4-7day_dpr11gal4_fruFLP_uas_stop_mcd8gfp male 3
	dpr 11 male brain 4	absent	loop present	all present; thick rings, thick junction	Present in both DA1 (faint) and both VA1vs	absent			F6	4-7day_dpr11gal4_fruFLP_uas_stop_mcd8gfp male 4
	dpr 11 male brain 5	present	loop present	long thick arch, thick rings, thick junction, crescent present	Present in both DA1 (intense) and both VA1vs	absent			G5	4-7day_dpr11gal4_fruFLP_uas_stop_mcd8gfp male 5
	dpr 11 male VNC 1						present	present	I9	4-7day_dpr11gal4_fruFLP_uas_stop_mcd8gfp male VNC
	dpr 11 male VNC 2						absent	absent	K2	4-7day_dpr11gal4_fruFLP_uas_stop_mcd8gfp male VNC 2
	dpr 11 male VNC 3						present	present	Q7	4-7day_dpr11gal4_fruFLP_uas_stop_mcd8gfp male VNC 3
	dpr 11 male VNC 4						unscorable	unscorable	J3	4-7day_dpr11gal4_fruFLP_uas_stop_mcd8gfp male VNC 4
	dpr 11 male VNC 5						present	present	E2	4-7day_dpr11gal4_fruFLP_uas_stop_mcd8gfp male VNC 5
	dpr 12 female brain 1	Absent	No, you can see the median bundle neurons project downwards but the loop is not seen in the stacks or in the 3D projection	Yes, all the parts of the complex are very light/faint in expression the arch fades into the junction which isn't very obvious (female like) and the ring and crescent are very light	Present in both DA1 and both VA1vs	Yes, present expression is not dense but it is bright			BS_B9	4-7day_dpr12gal4_fruFLP_uas_stop_mcd8gfp female 5
	dpr 12 female brain 2	Absent	Loop is absent	Yes, all are very faint and the arch is female like where it is thinner as it goes down into the junction and ring	Present in both DA1 and both VA1vs	Yes			BS_E8	4-7day_dpr12gal4_fruFLP_uas_stop_mcd8gfp female 4
	dpr 12 female brain 3	Absent	Absent	The arch is present but thins as it moves towards the junction (female-like) the ring and crescent are very faint in expression which makes it hard to determine if the ring is complete and if the crescent is present	Present in both DA1 and both VA1vs	Yes			BS_S3	4-7day_dpr12gal4_fruFLP_uas_stop_mcd8gfp female
	dpr 12 female brain 4	Absent	Loop is present but not completed in the SOG	All parts of the complex are present the arch is thin as it moves to the junction all parts of the complex are light in expression compared to the glomeruli and mushroom body	Present in both DA1 and both VA1vs	Yes			BS_T5	4-7day_dpr12gal4_fruFLP_uas_stop_mcd8gfp female 2
	dpr 12 female brain 5	Absent	Loop is present but not completed in the SOG and is very faint in expression	All parts of the complex are present the arch is thin as it moves to the junction all parts of the complex are light in expression compared to the glomeruli and mushroom body	Present in both DA1 and both VA1vs	Yes			BS_T7	4-7day_dpr12gal4_fruFLP_uas_stop_mcd8gfp female 3
	dpr 12 female VNC 1						absent	absent	BS_B6	4-7day_dpr12gal4_fruFLP_uas_stop_mcd8gfp female VNC 3
	dpr 12 female VNC 2						absent	absent	BS_C3	4-7day_dpr12gal4_fruFLP_uas_stop_mcd8gfp female VNC
	dpr 12 female VNC 3						absent	absent	BS_D7	4-7day_dpr12gal4_fruFLP_uas_stop_mcd8gfp female VNC 2
	dpr 12 female VNC 4						absent	absent	BS_N3	4-7day_dpr12gal4_fruFLP_uas_stop_mcd8gfp female VNC 5
	dpr 12 female VNC 5						absent	absent	BS_N6	4-7day_dpr12gal4_fruFLP_uas_stop_mcd8gfp female VNC 4
	dpr 12 male brain 1	Absent	Yes, Faint	Yes, but faint and male-like	Absent	present			BS_H2	4-7day_dpr12gal4_fruFLP_uas_stop_mcd8gfp male 5
	dpr 12 male brain 2	Present!	Loop is present	Yes, all parts of the complex are present but faint in expression levels compared to the mushroom body	Present in both DA1 and both VA1vs	present			BS_P6	4-7day_dpr12gal4_fruFLP_uas_stop_mcd8gfp male v2
	dpr 12 male brain 3	Present	Loop is present	All the parts of the complex are present the arch tapers down into the junction/ ring (female-like) all parts of the complex are very faint in expression compared to the mushroom body expression	DA1 present VA1v absent	present			BS_R5	4-7day_dpr12gal4_fruFLP_uas_stop_mcd8gfp male 3
	dpr 12 male brain 4	Present	Loop is present	thick arch expression (male-like) and all other components of the complex are present but slightly more faint in expression	DA1 present VA1v absent	present			BS_S9	4-7day_dpr12gal4_fruFLP_uas_stop_mcd8gfp male 4
	dpr 12 male brain 5	Present	Loop is present	Yes, all	DA1 present VA1v absent	present			BS_G3	4-7day_dpr12gal4_fruFLP_uas_stop_mcd8gfp male
	dpr 12 male VNC 1						present	present	BS_H3	4-7day_dpr12gal4_fruFLP_uas_stop_mcd8gfp male VNC 6
	dpr 12 male VNC 2						present	present	BS_H4	4-7day_dpr12gal4_fruFLP_uas_stop_mcd8gfp male VNC 5
	dpr 12 male VNC 3						present	present	BS_K5	4-7day_dpr12gal4_fruFLP_uas_stop_mcd8gfp male VNC 4
	dpr 12 male VNC 4						absent	present	BS_M4	4-7day_dpr12gal4_fruFLP_uas_stop_mcd8gfp male VNC 3
	dpr 12 male VNC 5						present	present	BS_N1	4-7day_dpr12gal4_fruFLP_uas_stop_mcd8gfp male VNC
	dpr 14 female brain 1	absent	sparse expression; loop absent	very light expression in all; short arch present, thin ring on left side, no junction nor crescent	Absent	present			C7	4-7daysDpr14GAL4_UASstopsmGDPmycstop_FruFLP female
	dpr 14 female brain 2	absent	sparse expression; loop absent	hard to see bc all expression is so dim but arch present and nothing else	DA1 present VA1v absent	present			C9	4-7daysDpr14GAL4_UASstopsmGDPmycstop_FruFLP female 3
	dpr 14 female brain 3	absent	loop absent; sparse expression	thin arch, very thin ring, junction and crescent absent	DA1 present VA1v absent	present			L5	4-7daysDpr14GAL4_UASstopsmGDPmycstop_FruFLP female 4
	dpr 14 female brain 4	absent	no	thin arch, thin rings, junction present; crescent absent	DA1 present VA1v absent	present			I6	4-7daysDpr14GAL4_UASstopsmGDPmycstop_FruFLP female 5
	dpr 14 female brain 5	absent	loop absent; lots of projection	short arch, can faintly see rings and junction but no crescent	DA1 present VA1v absent	present			O5	4-7daysDpr14GAL4_UASstopsmGDPmycstop_FruFLP female 6
	dpr 14 female VNC 1						absent	absent	I3	4-7daysDpr14GAL4_UASstopsmGDPmycstop_FruFLP female VNC
	dpr 14 female VNC 2						absent	absent	R4	4-7daysDpr14GAL4_UASstopsmGDPmycstop_FruFLP female VNC 2
	dpr 14 female VNC 3						absent	absent	G7	4-7daysDpr14GAL4_UASstopsmGDPmycstop_FruFLP female VNC 3
	dpr 14 female VNC 4						absent	absent	I1	4-7daysDpr14GAL4_UASstopsmGDPmycstop_FruFLP female VNC 4
	dpr 14 female VNC 5						absent	absent	F5	4-7daysDpr14GAL4_UASstopsmGDPmycstop_FruFLP female VNC 5
	dpr 14 male brain 1	present	yes projections; loop present	arch present; very light ring on left side with crescent and junction	Absent	present			C3	4-7daysDpr14GAL4_UASstopsmGDPmycstop_FruFLP male 3
	dpr 14 male brain 2	absent	loop present	long arch present; all others absent	Absent	present			G1	4-7daysDpr14GAL4_UASstopsmGDPmycstop_FruFLP male 4
	dpr 14 male brain 3	absent	loop present; sparse expression	long arch present; ring, junction, crescent all absent	DA1 present VA1v absent	present			M7	4-7daysDpr14GAL4_UASstopsmGDPmycstop_FruFLP male 5
	dpr 14 male brain 4	absent	sparse expression; loop present	arch present but very light; ring, junction, crescent very light and thin	DA1 present VA1v absent	present			C6	4-7daysDpr14GAL4_UASstopsmGDPmycstop_FruFLP male 6
	dpr 14 male brain 5	absent	loop present; expression in SOG	long arch and junction present	Absent	present			E5	4-7daysDpr14GAL4_UASstopsmGDPmycstop_FruFLP male 7
	dpr 14 male VNC 1						present	present	A8	4-7daysDpr14GAL4_UASstopsmGDPmycstop_FruFLP male VNC
	dpr 14 male VNC 2						absent	present	P6	4-7daysDpr14GAL4_UASstopsmGDPmycstop_FruFLP male VNC 2
	dpr 14 male VNC 3						present	present	J4	4-7daysDpr14GAL4_UASstopsmGDPmycstop_FruFLP male VNC 3
	dpr 14 male VNC 4						present	absent	F7	4-7daysDpr14GAL4_UASstopsmGDPmycstop_FruFLP male VNC 4
	dpr 14 male VNC 5						present	present	E3	4-7daysDpr14GAL4_UASstopsmGDPmycstop_FruFLP male VNC 5
	dpr 15 female brain 1	absent	loop absent	short arch, thin rings, thin junction, no crescent	Absent	absent			O3	4-7day_dpr15gal4_fruFLP_uas_stop_mcd8gfp female
	dpr 15 female brain 2	absent	projections; loop absent	unscorable	Absent	absent			C1	4-7day_dpr15gal4_fruFLP_uas_stop_mcd8gfp female 2
	dpr 15 female brain 3	absent	loop absent; lots of expression	short arch, thin rings, thin crescent, thin junction	DA1 present VA1v absent	absent			K5	4-7day_dpr15gal4_fruFLP_uas_stop_mcd8gfp female 3
	dpr 15 female brain 4	absent	loop absent	all present but thin and light; arch very thin and short	DA1 present VA1v absent	absent			B5	4-7day_dpr15gal4_fruFLP_uas_stop_mcd8gfp female 4
	dpr 15 female brain 5	absent	loop absent; sparse expression and 1 large cell body at bottom of SOG	short arch, thin ring, thin junction, thin crescent	DA1 present VA1v absent	absent			N1	4-7day_dpr15gal4_fruFLP_uas_stop_mcd8gfp female 5
	dpr 15 female VNC 1						absent	absent	E6	4-7day_dpr15gal4_fruFLP_uas_stop_mcd8gfp female VNC
	dpr 15 female VNC 2						present	present	A3	4-7day_dpr15gal4_fruFLP_uas_stop_mcd8gfp female VNC 2
	dpr 15 female VNC 3						absent	absent	A9	4-7day_dpr15gal4_fruFLP_uas_stop_mcd8gfp female VNC 3
	dpr 15 female VNC 4						present	present	A6	4-7day_dpr15gal4_fruFLP_uas_stop_mcd8gfp female VNC 4
	dpr 15 female VNC 5						absent	absent	F8	4-7day_dpr15gal4_fruFLP_uas_stop_mcd8gfp female VNC 5
	dpr 15 male brain 1	present	loop present	long, thick arch; thick rings, thick junction, crescent present	Absent	absent			I4	4-7day_dpr15gal4_fruFLP_uas_stop_mcd8gfp male
	dpr 15 male brain 2	absent	loop present	long arch, thick rings, junction and crescent present	DA1 present VA1v absent	absent			G9	4-7day_dpr15gal4_fruFLP_uas_stop_mcd8gfp male 2
	dpr 15 male brain 3	present	faint loop present; not much expression elsewhere	long thick arch, thick rings, thick junction, crescent absent	Absent	absent			R5	4-7day_dpr15gal4_fruFLP_uas_stop_mcd8gfp male 4
	dpr 15 male brain 4	present	loop present	long arch, thick rings, thick junction, thin crescent	Absent	absent			O1	4-7day_dpr15gal4_fruFLP_uas_stop_mcd8gfp male 5
	dpr 15 male brain 5	present	loop present	all present (thick ring and junction)	DA1 present VA1v absent	absent			B7	4-7day_dpr15gal4_fruFLP_uas_stop_mcd8gfp male 6
	dpr 15 male VNC 1						present	present	N4	4-7day_dpr15gal4_fruFLP_uas_stop_mcd8gfp male VNC
	dpr 15 male VNC 2						present	present	J2	4-7day_dpr15gal4_fruFLP_uas_stop_mcd8gfp male VNC 2
	dpr 15 male VNC 3						present	present	P4	4-7day_dpr15gal4_fruFLP_uas_stop_mcd8gfp male VNC 3
	dpr 15 male VNC 4						present	present	J8	4-7day_dpr15gal4_fruFLP_uas_stop_mcd8gfp male VNC 4
	dpr 15 male VNC 5						absent	present	O9	4-7day_dpr15gal4_fruFLP_uas_stop_mcd8gfp male VNC 5
	dpr 16 female brain 1	Absent	Small loop is present, projections downwards from the median bundle very fain though but there is branching present in the SOG	Yes, all the parts are present the junction is the brightest	Absent	absent			BS_D4	4-7day_dpr16gal4_fruFLP_uas_stop_mcd8gfp female 3
	dpr 16 female brain 2	Absent	Loop is absent but faint branching in the SOG	All parts of the junction are present	Absent	absent			BS_K1	4-7day_dpr16gal4_fruFLP_uas_stop_mcd8gfp female 2
	dpr 16 female brain 3	Absent	A small loop is present in the SOG connecting the midline expression together mostly branching expression is visible in the SOG	Yes, all parts of the complex are present the arch expression thins in expression as it tapers down towards the junction of the complex bright in expression level	Absent	absent			BS_N8	4-7day_dpr16gal4_fruFLP_uas_stop_mcd8gfp female 6
	dpr 16 female brain 4	Absent	Loop is absent	Yes, all present(female-like)	Absent	absent			BS_J1	4-7day_dpr16gal4_fruFLP_uas_stop_mcd8gfp female 4 v2
	dpr 16 female brain 5	Absent	Loop is very faint but there is branching in the SOG	Yes, all the junctions is bright and the arch is thin	Absent	absent			BS_F2	4-7day_dpr16gal4_fruFLP_uas_stop_mcd8gfp female
	dpr 16 female VNC 1						absent	present	BS_A2	4-7day_dpr16gal4_fruFLP_uas_stop_mcd8gfp female VNC 4
	dpr 16 female VNC 2						absent	absent	BS_G2	4-7day_dpr16gal4_fruFLP_uas_stop_mcd8gfp female VNC 5
	dpr 16 female VNC 3						absent	absent	BS_H6	4-7day_dpr16gal4_fruFLP_uas_stop_mcd8gfp female VNC 2
	dpr 16 female VNC 4						absent	absent	BS_M3	4-7day_dpr16gal4_fruFLP_uas_stop_mcd8gfp female VNC 3
	dpr 16 female VNC 5						present	present	BS_T6	4-7day_dpr16gal4_fruFLP_uas_stop_mcd8gfp female VNC
	dpr 16 male brain 1	Present	there is a cut in the brain in the SOG are but the loop is present because you can see the two halves of the semi circle you just cant see the connection because of the cut and cant get a good idea of the SOG expression due to the cut	Yes, all the parts of the complex are present and the arch is thick in expression as it goes down to the junction which is male-like	Absent	absent			BS_A9	4-7day_dpr16gal4_fruFLP_uas_stop_mcd8gfp male 2
	dpr 16 male brain 2	Absent	Present, faint	All present but very faint	Absent	absent			BS_K9	4-7day_dpr16gal4_fruFLP_uas_stop_mcd8gfp male 5
	dpr 16 male brain 3	Present!	Loop is present and thick and bright in expression	All parts of the complex are present and thick and bright in expression (male-like)	Absent	absent			BS_M8	4-7day_dpr16gal4_fruFLP_uas_stop_mcd8gfp male 3
	dpr 16 male brain 4	Present	Yes, present	Yes, all parts of complex are present and thick/bright in expression (male-like)	Absent	absent			BS_N2	4-7day_dpr16gal4_fruFLP_uas_stop_mcd8gfp male
	dpr 16 male brain 5	Present	Loop is present and branching in the SOG	thick arch expression (male-like) and all other components of the complex are present but slightly more faint in expression	Absent	absent			BS_T1	4-7day_dpr16gal4_fruFLP_uas_stop_mcd8gfp male 4
	dpr 16 male VNC 1						present	present	BS_D1	4-7day_dpr16gal4_fruFLP_uas_stop_mcd8gfp male VNC 4
	dpr 16 male VNC 2						present	present	BS_H9	4-7day_dpr16gal4_fruFLP_uas_stop_mcd8gfp male VNC 2
	dpr 16 male VNC 3						absent	present	BS_K8	4-7day_dpr16gal4_fruFLP_uas_stop_mcd8gfp male VNC 3
	dpr 16 male VNC 4						absent	present	BS_P2	4-7day_dpr16gal4_fruFLP_uas_stop_mcd8gfp male VNC 5
	dpr 16 male VNC 5						present	present	BS_S1	4-7day_dpr16gal4_fruFLP_uas_stop_mcd8gfp male VNC
	dpr 17 female brain 1	absent	loop absent; lots of expression, large cell body at bottom of SOG	thin arch, thin rings, thick junction, thick crescent	DA1 present VA1v absent	absent			K3	4-7day_dpr17gal4_fruFLP_uas_stop_mcd8gfp female 2
	dpr 17 female brain 2	absent	loop absent; sparse expression and large cell bodies at bottom of SOG	short arch, thin ring, thick junction, thin crescent	DA1 present VA1v absent	absent			M9	4-7day_dpr17gal4_fruFLP_uas_stop_mcd8gfp female 3
	dpr 17 female brain 3	absent	loop absent, sparse expression and large cell body at bottom	light thin rings, junction present, very thin crescent, very thin arch	Absent	absent			P9	4-7day_dpr17gal4_fruFLP_uas_stop_mcd8gfp female 4
	dpr 17 female brain 4	absent	loop absent; lots of expression	short arch, thin ring, junction and crescent present	DA1 present VA1v absent	absent			G2	4-7day_dpr17gal4_fruFLP_uas_stop_mcd8gfp female 5
	dpr 17 female brain 5	absent	sparse expression, loop absent	junction absent; rest are thin	DA1 present VA1v absent	absent			B6	4-7day_dpr17gal4_fruFLP_uas_stop_mcd8gfp female 6
	dpr 17 female VNC 1						absent	absent	A2	4-7day_dpr17gal4_fruFLP_uas_stop_mcd8gfp female VNC
	dpr 17 female VNC 2						absent	absent	L7	4-7day_dpr17gal4_fruFLP_uas_stop_mcd8gfp female VNC 2
	dpr 17 female VNC 3						absent	absent	Q1	4-7day_dpr17gal4_fruFLP_uas_stop_mcd8gfp female VNC 3
	dpr 17 female VNC 4						absent	absent	L3	4-7day_dpr17gal4_fruFLP_uas_stop_mcd8gfp female VNC 4
	dpr 17 female VNC 5						absent	absent	P7	4-7day_dpr17gal4_fruFLP_uas_stop_mcd8gfp female VNC 5
	dpr 17 male brain 1	absent	loop present (light)	thin arch, very thick rings, very thick junction, thin crescent	Absent	absent			J6	4-7day_dpr17gal4_fruFLP_uas_stop_mcd8gfp male
	dpr 17 male brain 2	absent	loop present	thick ring, long arch, all present	Absent	absent			E7	4-7day_dpr17gal4_fruFLP_uas_stop_mcd8gfp male 2
	dpr 17 male brain 3	absent	loop present	long arch, thick ring, thick junction, crescent	Absent	absent			D8	4-7day_dpr17gal4_fruFLP_uas_stop_mcd8gfp male 3
	dpr 17 male brain 4	absent	loop present	thick long arch, thick rings, thick junction, thin crescent	Absent	absent			R7	4-7day_dpr17gal4_fruFLP_uas_stop_mcd8gfp male 4
	dpr 17 male brain 5	absent	faint loop present; not much expression otherwise	long arch, thick rings, thick junction, crescent present	Absent	absent			R2	4-7day_dpr17gal4_fruFLP_uas_stop_mcd8gfp male 5
	dpr 17 male VNC 1						absent	present	L6	4-7day_dpr17gal4_fruFLP_uas_stop_mcd8gfp male VNC
	dpr 17 male VNC 2						absent	present	R6	4-7day_dpr17gal4_fruFLP_uas_stop_mcd8gfp male VNC 2
	dpr 17 male VNC 3						present	present	N8	4-7day_dpr17gal4_fruFLP_uas_stop_mcd8gfp male VNC 3
	dpr 17 male VNC 4						present	present	K4	4-7day_dpr17gal4_fruFLP_uas_stop_mcd8gfp male VNC 4
	dpr 17 male VNC 5						absent	present	D4	4-7day_dpr17gal4_fruFLP_uas_stop_mcd8gfp male VNC 5
	dpr 18 female brain 1	Absent	Loop absent branching present in SOG	Arch is very faint almost missing but junction, ring, and crescent present	Absent	absent			BS_J9	4-7daysDpr18GAL4_UASstopsmGDPmycstop_FruFLP female
	dpr 18 female brain 2	Absent	Yes, but very faint and mostly seen completed in one stack lots of branching in the SOG	Yes, all parts are present however there is an additional "ring" like expression above the ring of the complex	Absent	absent			BS_K7	4-7daysDpr18GAL4_UASstopsmGDPmycstop_FruFLP female 5
	dpr 18 female brain 3	Absent	Absent, cuts in the SOG	Yes, all parts of the complex are present, faint in expression where it is hard to see if the arch completes as it meets the junction or if the ring completes	DA1 present VA1v absent	absent			BS_Q2	4-7daysDpr18GAL4_UASstopsmGDPmycstop_FruFLP female 2
	dpr 18 female brain 4	Absent	Loop is absent but there is expression in the SOG more on the right side of the brain visible in the 3D projection	Yes, all the junction is larger than usual and the additional "ring" above the ring of the complex is present but it is not a complete circle it is missing the expression on the top	Absent	absent			BS_C8	4-7daysDpr18GAL4_UASstopsmGDPmycstop_FruFLP female 4
	dpr 18 female brain 5	Present	Present	Yes, all present (female-like)	Absent	absent			BS_G7	4-7daysDpr18GAL4_UASstopsmGDPmycstop_FruFLP female 3
	dpr 18 female VNC 1						absent	absent	BS_A1	4-7daysDpr18GAL4_UASstopsmGDPmycstop_FruFLP female VNC
	dpr 18 female VNC 2						absent	absent	BS_A4	4-7daysDpr18GAL4_UASstopsmGDPmycstop_FruFLP female VNC 4
	dpr 18 female VNC 3						absent	absent	BS_O7	4-7daysDpr18GAL4_UASstopsmGDPmycstop_FruFLP female VNC 5
	dpr 18 female VNC 4						absent	absent	BS_P9	4-7daysDpr18GAL4_UASstopsmGDPmycstop_FruFLP female VNC 3
	dpr 18 female VNC 5						absent	absent	BS_Q1	4-7daysDpr18GAL4_UASstopsmGDPmycstop_FruFLP female VNC 2
	dpr 18 male brain 1	Present	Loop is present	Yes, all arch is thick (male-like)	Absent	absent			BS_D9	4-7daysDpr18GAL4_UASstopsmGDPmycstop_FruFLP male 4
	dpr 18 male brain 2	Present	Present, dark/thick	All parts of the complex are present and male like expression pattern with the arch being thick in expression as it moves to the junction	Present in both DA1 and both VA1vs	absent			BS_M1	4-7daysDpr18GAL4_UASstopsmGDPmycstop_FruFLP male 5
	dpr 18 male brain 3	Present	Present, dark/thick	All parts of the complex are present the junction is the brightest and the arch is not thick, it tapers down into the junction	Absent	absent			BS_M2	4-7daysDpr18GAL4_UASstopsmGDPmycstop_FruFLP male 6
	dpr 18 male brain 4	Present	loop is present in the SOG	All parts of the complex are present the junction is the thickest in expression all of the complex is faint in expression	Absent	absent			BS_O2	4-7daysDpr18GAL4_UASstopsmGDPmycstop_FruFLP male 3
	dpr 18 male brain 5	Absent	Loop is present	All parts of the complex are present the arch is thin in expression (female-like) as it moves toward the junction the ring and crescent are present but very faint in expression the ring also goes into the loop in the OSG which I feel like I haven't noticed before and other (crimic) brains	Absent	absent			BS_S8	4-7daysDpr18GAL4_UASstopsmGDPmycstop_FruFLP male
	dpr 18 male VNC 1						absent	absent	BS_C1	4-7daysDpr18GAL4_UASstopsmGDPmycstop_FruFLP male VNC 3
	dpr 18 male VNC 2						present	present	BS_E6	4-7daysDpr18GAL4_UASstopsmGDPmycstop_FruFLP male VNC 4
	dpr 18 male VNC 3						absent	present	BS_E7	4-7daysDpr18GAL4_UASstopsmGDPmycstop_FruFLP male VNC 5
	dpr 18 male VNC 4						absent	absent	BS_O6	4-7daysDpr18GAL4_UASstopsmGDPmycstop_FruFLP male VNC 2
	dpr 18 male VNC 5						present	present	BS_P1	4-7daysDpr18GAL4_UASstopsmGDPmycstop_FruFLP male VNC

## Sheet: Scoring Data Processed
A key for columns D-J is provided in 'items scored' in Read_Me sheet, with definitions for abbreviations	Abbreviated genotype	mAL neuron (present/ absent)	tritocerebral loop (present/ absent)	LPC: Arch (absent/present)	LPC: Rings (absent/present)	LPC: Junction (absent/present)	LPC: Crescent (absent/present)	DA1: Antennal lobe glomeruli expression (present/ absent)	VA1v: Antennal lobe glomeruli expression (present/ absent)	Mushroom body expression (present/ absent)	Midline Crossing (present/ absent)	Mesothoracic Triangle Neurons (present/ absent)	Internal Lab Notation: Blinded Image File name	Internal Lab Notation: Confocal Image File Name
	DIP alpha female brain 1	absent	present	absent	absent	absent	absent	absent	absent	absent			K2	4d_female_DIPalpha_55810_fruflp_4_20180920
	DIP alpha female brain 2	absent	absent	present	absent	absent	absent	absent	absent	absent			L2	4d_female_DIPalpha_55810_fruflp_1_20180917
	DIP alpha female brain 3	absent	absent	present	absent	absent	absent	absent	absent	absent			P9	4d_female_DIPalpha_55810_fruflp_5_20180921
	DIP alpha female brain 4	absent	absent	present	absent	absent	absent	absent	absent	absent			Q1	4d_female_DIPalpha_55810_fruflp_2_20180918
	DIP alpha female brain 5	absent	present	present	absent	absent	absent	absent	absent	absent			Q9	4d_female_DIPalpha_55810_fruflp_3_20180919
	Numerical Scoring Observation	0	0.4	0.8	0	0	0	0	0	0
	DIP alpha female VNC 1										present	absent	BB6	6d_female_vnc_DIPalpha_55810_fruflp_3_20181106
	DIP alpha female VNC 2										present	absent	BB8	6d_female_vnc_DIPalpha_55810_fruflp_2_20181106
	DIP alpha female VNC 3										absent	absent	DD6	6d_female_vnc_DIPalpha_55810_fruflp_6_20181106
	DIP alpha female VNC 4										absent	absent	FF9	6d_female_vnc_DIPalpha_55810_fruflp_4_20181106
	DIP alpha female VNC 5										absent	present	GG7	6d_female_vnc_DIPalpha_55810_fruflp_5_20181106
	Numerical Scoring Observation										0.4	0.2
	DIP alpha male brain 1	absent	present	absent	absent	absent	absent	absent	absent	absent			K5	4d_male_DIPalpha_55810_fruflp_4_20180920
	DIP alpha male brain 2	absent	absent	present	absent	absent	absent	absent	absent	absent			L7	4d_male_DIPalpha_55810_fruflp_1_20180917
	DIP alpha male brain 3	absent	absent	absent	absent	absent	absent	absent	absent	absent			M3	4d_male_DIPalpha_55810_fruflp_6_20180921
	DIP alpha male brain 4	absent	absent	absent	absent	absent	absent	absent	absent	absent			N2	4d_male_DIPalpha_55810_fruflp_3_20180919
	DIP alpha male brain 5	absent	absent	absent	absent	absent	absent	absent	absent	absent			N5	4d_male_DIPalpha_55810_fruflp_2_20180918
	Numerical Scoring Observation	0	0.2	0.2	0	0	0	0	0	0
	DIP alpha male VNC 1										NA	absent	CC0	6d_male_vnc_DIPalpha_55810_fruflp_2_20181106
	DIP alpha male VNC 2										NA	absent	CC6	6d_male_vnc_DIPalpha_55810_fruflp_5_20181106
	DIP alpha male VNC 3										NA	NA	EE3	6d_male_vnc_DIPalpha_55810_fruflp_4_20181106
	DIP alpha male VNC 4										absent	absent	FF8	6d_male_vnc_DIPalpha_55810_fruflp_3_20181106
	DIP alpha male VNC 5										absent	absent	GG6	6d_male_vnc_DIPalpha_55810_fruflp_1_20181106
	Numerical Scoring Observation										0	0
	DIP beta female brain 1	absent	absent	present	present	present	present	absent	absent	absent			K7	4-7day_DIPBetagal4_fruFLP_uas_stop_mcd8gfp female5
	DIP beta female brain 2	absent	absent	present	present	present	absent	absent	absent	absent			P0	4-7day_DIPBetagal4_fruFLP_uas_stop_mcd8gfp female1
	DIP beta female brain 3	absent	absent	present	present	present	present	absent	absent	absent			Q2	4-7day_DIPBetagal4_fruFLP_uas_stop_mcd8gfp female2
	DIP beta female brain 4	absent	absent	present	present	present	absent	absent	absent	absent			R0	4-7day_DIPBetagal4_fruFLP_uas_stop_mcd8gfp female3
	DIP beta female brain 5	absent	absent	present	present	present	present	absent	absent	absent			R9	4-7day_DIPBetagal4_fruFLP_uas_stop_mcd8gfp female4
	Numerical Scoring Observation	0	0	1	1	1	0.6	0	0	0
	DIP beta female VNC 1										NA	NA	AA0	4-7day_DIPBetagal4_fruFLP_uas_stop_mcd8gfp female 3
	DIP beta female VNC 2										NA	NA	AA6	4-7day_DIPBetagal4_fruFLP_uas_stop_mcd8gfp female 4
	DIP beta female VNC 3										absent	absent	BB2	4-7day_DIPBetagal4_fruFLP_uas_stop_mcd8gfp female 1
	DIP beta female VNC 4										NA	NA	EE8	4-7day_DIPBetagal4_fruFLP_uas_stop_mcd8gfp female 2
	DIP beta female VNC 5										absent	absent	FF6	4-7day_DIPBetagal4_fruFLP_uas_stop_mcd8gfp female 5
	Numerical Scoring Observation										0	0
	DIP beta male brain 1	absent	present	present	present	present	absent	absent	absent	absent			J1	4-7day_DIPBetagal4_fruFLP_uas_stop_mcd8gfp male5
	DIP beta male brain 2	absent	present	present	present	present	present	absent	absent	absent			M2	4-7day_DIPBetagal4_fruFLP_uas_stop_mcd8gfp male2
	DIP beta male brain 3	absent	absent	present	present	present	present	absent	absent	absent			N0	4-7day_DIPBetagal4_fruFLP_uas_stop_mcd8gfp male1
	DIP beta male brain 4	absent	present	present	present	present	present	absent	absent	absent			Q0	4-7day_DIPBetagal4_fruFLP_uas_stop_mcd8gfp male3
	DIP beta male brain 5	absent	absent	present	present	present	present	absent	absent	absent			R5	4-7day_DIPBetagal4_fruFLP_uas_stop_mcd8gfp male4
	Numerical Scoring Observation	0	0.6	1	1	1	0.8	0	0	0
	DIP beta male VNC 1										NA	NA	AA4	4-7day_DIPBetagal4_fruFLP_uas_stop_mcd8gfp male VNC 4
	DIP beta male VNC 2										present	absent	CC9	4-7day_DIPBetagal4_fruFLP_uas_stop_mcd8gfp male VNC 5
	DIP beta male VNC 3										present	present	DD3	4-7day_DIPBetagal4_fruFLP_uas_stop_mcd8gfp male VNC 3
	DIP beta male VNC 4										present	present	FF4	4-7day_DIPBetagal4_fruFLP_uas_stop_mcd8gfp male VNC 1
	DIP beta male VNC 5										absent	absent	GG5	4-7day_DIPBetagal4_fruFLP_uas_stop_mcd8gfp male VNC 2
	Numerical Scoring Observation										0.75	0.5
	DIP delta female brain 1	absent	absent	absent	absent	absent	absent	absent	absent	absent			K9	6d_female_DIPdelta_55810_fruflp_6_20180926
	DIP delta female brain 2	absent	absent	absent	absent	absent	absent	absent	absent	absent			L9	6d_female_DIPdelta_55810_fruflp_16_20180929
	DIP delta female brain 3	absent	absent	absent	absent	absent	absent	absent	absent	absent			P3	6d_female_DIPdelta_55810_fruflp_2_20180925
	DIP delta female brain 4	absent	absent	absent	absent	absent	absent	absent	absent	absent			P6	6d_female_DIPdelta_55810_fruflp_7_20180927
	DIP delta female brain 5	absent	absent	absent	absent	absent	absent	absent	absent	absent			P7	6d_female_DIPdelta_55810_fruflp_15_20180928
	Numerical Scoring Observation	0	0	0	0	0	0	0	0	0
	DIP delta female VNC 1										absent	absent	AA8	6d_female_DIPdelta_VNC_55810_fruflp_3_20190201
	DIP delta female VNC 2										absent	absent	CC5	6d_female_DIPdelta_VNC_55810_fruflp_4_20190201
	DIP delta female VNC 3										present	absent	EE4	6d_female_DIPdelta_VNC_55810_fruflp_1_20181005
	DIP delta female VNC 4										NA	present	HH3	6d_female_DIPdelta_VNC_55810_fruflp_2_20181005
	DIP delta female VNC 5										absent	present	HH5	6d_female_DIPdelta_VNC_55810_fruflp_5_20190201
	Numerical Scoring Observation										0.25	0.4
	DIP delta male brain 1	absent	absent	absent	absent	absent	absent	absent	absent	absent			J0	6d_male_DIPdelta_55810_fruflp_7_20180929
	DIP delta male brain 2	absent	absent	absent	absent	absent	absent	absent	absent	absent			L6	6d_male_DIPdelta_55810_fruflp_6_20180928
	DIP delta male brain 3	absent	absent	absent	absent	absent	absent	absent	absent	absent			M7	6d_male_DIPdelta_55810_fruflp_2_20180925
	DIP delta male brain 4	absent	absent	absent	absent	absent	absent	absent	absent	absent			M8	6d_male_DIPdelta_55810_fruflp_4_20180927
	DIP delta male brain 5	absent	absent	absent	absent	absent	absent	absent	absent	absent			P2	6d_male_DIPdelta_55810_fruflp_3_20180926
	Numerical Scoring Observation	0	0	0	0	0	0	0	0	0
	DIP delta male VNC 1										present	absent	DD8	6d_male_DIPdelta_VNC_55810_fruflp_5_20190201
	DIP delta male VNC 2										present	absent	EE5	6d_male_DIPdelta_VNC_55810_fruflp_2_20181005
	DIP delta male VNC 3										present	absent	FF2	6d_male_DIPdelta_VNC_55810_fruflp_1_20181005
	DIP delta male VNC 4										absent	absent	HH0	6d_male_DIPdelta_VNC_55810_fruflp_6_20190201
	DIP delta male VNC 5										present	present	HH6	6d_male_DIPdelta_VNC_55810_fruflp_4_20190201
	Numerical Scoring Observation										0.8	0.2
	DIP epsilon female brain 1	absent	absent	present	present	present	absent	absent	absent	absent			J3	4-7day_DIPEpsilongal4_fruFLP_uas_stop_mcd8gfp female3
	DIP epsilon female brain 2	absent	absent	present	present	present	present	absent	absent	absent			K1	4-7day_DIPEpsilongal4_fruFLP_uas_stop_mcd8gfp female1
	DIP epsilon female brain 3	absent	absent	present	present	present	absent	absent	absent	absent			L4	4-7day_DIPEpsilongal4_fruFLP_uas_stop_mcd8gfp female5
	DIP epsilon female brain 4	absent	absent	present	present	present	absent	absent	absent	absent			N8	4-7day_DIPEpsilongal4_fruFLP_uas_stop_mcd8gfp female2
	DIP epsilon female brain 5	absent	absent	present	present	present	absent	absent	absent	absent			R4	4-7day_DIPEpsilongal4_fruFLP_uas_stop_mcd8gfp female4
	Numerical Scoring Observation	0	0	1	1	1	0.2	0	0	0
	DIP epsilon female VNC 1										absent	present	BB1	4-7day_DIPepsilongal4_fruFLP_uas_stop_mcd8gfp female VNC 5
	DIP epsilon female VNC 2										NA	NA	BB4	4-7day_DIPepsilongal4_fruFLP_uas_stop_mcd8gfp female VNC 2
	DIP epsilon female VNC 3										present	present	FF0	4-7day_DIPepsilongal4_fruFLP_uas_stop_mcd8gfp female VNC 4
	DIP epsilon female VNC 4										present	absent	FF5	4-7day_DIPepsilongal4_fruFLP_uas_stop_mcd8gfp female VNC 3
	DIP epsilon female VNC 5										absent	absent	HH2	4-7day_DIPepsilongal4_fruFLP_uas_stop_mcd8gfp female VNC 1
	Numerical Scoring Observation										0.5	0.5
	DIP epsilon male brain 1	absent	absent	present	present	present	present	present	absent	absent			K3	4-7day_DIPEpsilongal4_fruFLP_uas_stop_mcd8gfp male7
	DIP epsilon male brain 2	absent	present	present	present	present	present	absent	absent	absent			L8	4-7day_DIPEpsilongal4_fruFLP_uas_stop_mcd8gfp male1
	DIP epsilon male brain 3	absent	absent	present	present	present	present	absent	absent	absent			M0	4-7day_DIPEpsilongal4_fruFLP_uas_stop_mcd8gfp male6
	DIP epsilon male brain 4	absent	absent	present	present	present	present	absent	absent	absent			M6	4-7day_DIPEpsilongal4_fruFLP_uas_stop_mcd8gfp male2
	DIP epsilon male brain 5	absent	absent	present	present	present	present	absent	absent	absent			N3	4-7day_DIPEpsilongal4_fruFLP_uas_stop_mcd8gfp male4
	Numerical Scoring Observation	0	0.2	1	1	1	1	0.2	0	0
	DIP epsilon male VNC 1										NA	NA	AA2	4-7day_DIPepsilongal4_fruFLP_uas_stop_mcd8gfp male VNC 2
	DIP epsilon male VNC 2										absent	absent	AA9	4-7day_DIPepsilongal4_fruFLP_uas_stop_mcd8gfp male VNC 5
	DIP epsilon male VNC 3										present	absent	BB3	4-7day_DIPepsilongal4_fruFLP_uas_stop_mcd8gfp male VNC 1
	DIP epsilon male VNC 4										absent	absent	BB7	4-7day_DIPepsilongal4_fruFLP_uas_stop_mcd8gfp male VNC 3
	DIP epsilon male VNC 5										absent	absent	DD0	4-7day_DIPepsilongal4_fruFLP_uas_stop_mcd8gfp male VNC 4
	Numerical Scoring Observation										0.25	0
	DIP eta female brain 1	absent	absent	present	present	present	present	present	present	absent			J9	4d_female_DIPeta_55810_fruflp_3_20180918
	DIP eta female brain 2	absent	absent	present	absent	absent	absent	present	present	absent			K4	4d_female_DIPeta_55810_fruflp_2_20180918
	DIP eta female brain 3	present	absent	present	present	present	present	present	present	absent			M4	6d_female_DIPeta_55810_fruflp_5_20180918
	DIP eta female brain 4	absent	absent	present	present	present	present	present	present	absent			N4	6d_female_DIPeta_55810_fruflp_4_20180918
	DIP eta female brain 5	absent	absent	present	present	present	absent	present	present	absent			P1	4d_female_DIPeta_55810_fruflp_1_20190313
	Numerical Scoring Observation	0.2	0	1	0.8	0.8	0.6	1	1	0
	DIP eta female VNC 1										present	absent	AA5	6d_female_DIPeta_vnc_55810_fruflp_2_20181005
	DIP eta female VNC 2										present	present	DD9	4d_female_DIPeta_vnc_55810_fruflp_4_20181005
	DIP eta female VNC 3										present	present	EE6	6d_female_DIPeta_vnc_55810_fruflp_1_20181005
	DIP eta female VNC 4										absent	absent	GG8	4d_female_DIPeta_vnc_55810_fruflp_3_20181005
	DIP eta female VNC 5										absent	absent	HH7	4d_female_DIPeta_vnc_55810_fruflp_5_20181005
	Numerical Scoring Observation										0.6	0.4
	DIP eta male brain 1	absent	present	present	present	present	present	present	present	absent			J7	6d_male_DIPeta_55810_fruflp_3_20180918
	DIP eta male brain 2	present	present	present	present	present	present	present	present	absent			K6	6d_male_DIPeta_55810_fruflp_1_20180918
	DIP eta male brain 3	present	present	present	present	present	present	present	present	absent			L1	6d_male_DIPeta_55810_fruflp_5_20180918
	DIP eta male brain 4	present	present	present	present	present	present	present	present	absent			N7	6d_male_DIPeta_55810_fruflp_2_20180918
	DIP eta male brain 5	present	present	present	present	present	present	present	present	absent			Q5	6d_male_DIPeta_55810_fruflp_4_20180918
	Numerical Scoring Observation	0.8	1	1	1	1	1	1	1	0
	DIP eta male VNC 1										present	absent	AA7	6d_male_VNC_DIPeta_55810_fruflp_2_20180918
	DIP eta male VNC 2										absent	present	BB9	6d_male_VNC_DIPeta_55810_fruflp_5_20180918
	DIP eta male VNC 3										present	present	CC7	6d_male_VNC_DIPeta_55810_fruflp_4_20180918
	DIP eta male VNC 4										present	present	DD5	6d_male_VNC_DIPeta_55810_fruflp_3_20181005
	DIP eta male VNC 5										present	present	HH9	6d_male_VNC_DIPeta_55810_fruflp_7_20180918
	Numerical Scoring Observation										0.8	0.8
	DIP gamma female brain 1	absent	absent	present	present	present	present	absent	absent	present			J8	6d_female_DIPGamma_55810_fruflp_7_20180925
	DIP gamma female brain 2	absent	absent	present	present	absent	absent	absent	absent	present			K0	6d_female_DIPGamma_55810_fruflp_3_20180925
	DIP gamma female brain 3	absent	absent	present	present	present	present	absent	absent	present			M5	6d_female_DIPGamma_55810_fruflp_4_20180925
	DIP gamma female brain 4	absent	absent	present	present	present	present	absent	absent	present			N6	6d_female_DIPGamma_55810_fruflp_5_20180925
	DIP gamma female brain 5	absent	absent	present	present	present	present	absent	absent	present			Q3	6d_female_DIPGamma_55810_fruflp_6_20180925
	Numerical Scoring Observation	0	0	1	1	0.8	0.8	0	0	1
	DIP gamma female VNC 1										NA	NA	CC1	6d__female_DIPgamma_VNC_55810_fruflp_4_20180918
	DIP gamma female VNC 2										NA	present	CC4	6d__female_DIPgamma_VNC_55810_fruflp_2_20180918
	DIP gamma female VNC 3										present	present	EE1	6d__female_DIPgamma_VNC_55810_fruflp_3_20180918
	DIP gamma female VNC 4										present	present	FF1	6d__female_DIPgamma_VNC_55810_fruflp_1_20180918
	DIP gamma female VNC 5										absent	absent	GG4	7d__female_DIPgamma_VNC_55810_fruflp_5_20190220
	Numerical Scoring Observation										0.666667	0.75
	DIP gamma male brain 1	absent	present	present	present	present	present	absent	absent	present			J5	6d_male_DIPGamma_55810_fruflp_4_20180918
	DIP gamma male brain 2	absent	present	present	present	present	present	absent	absent	present			P8	6d_male_DIPGamma_55810_fruflp_5_20180918
	DIP gamma male brain 3	present	present	present	present	present	present	absent	absent	present			Q6	6d_male_DIPGamma_55810_fruflp_8_20180918
	DIP gamma male brain 4	absent	present	present	present	present	absent	absent	absent	present			R6	6d_male_DIPGamma_55810_fruflp_2_20180918
	DIP gamma male brain 5	absent	present	present	present	present	present	absent	absent	present			R8	6d_male_DIPGamma_55810_fruflp_7_20180918
	Numerical Scoring Observation	0.2	1	1	1	1	0.8	0	0	1
	DIP gamma male VNC 1										present	present	AA3	6d__male_DIPgamma_VNC_55810_fruflp_1_20180918
	DIP gamma male VNC 2										NA	NA	BB0	6d__male_DIPgamma_VNC_55810_fruflp_2_20180918
	DIP gamma male VNC 3										NA	present	CC3	6d__male_DIPgamma_VNC_55810_fruflp_3_20180918
	DIP gamma male VNC 4										absent	absent	DD4	6d__male_DIPgamma_VNC_55810_fruflp_5_20180918
	DIP gamma male VNC 5										absent	absent	HH1	6d__male_DIPgamma_VNC_55810_fruflp_4_20180918
	Numerical Scoring Observation										0.333333	0.5
	DIP theta female brain 1	absent	absent	present	present	present	present	present	absent	absent			J2	4-7day_DIPThetagal4_fruFLP_uas_stop_mcd8gfp female3
	DIP theta female brain 2	absent	absent	present	present	present	present	present	absent	absent			L5	4-7day_DIPThetagal4_fruFLP_uas_stop_mcd8gfp female4
	DIP theta female brain 3	absent	absent	present	present	present	present	present	absent	absent			M1	4-7day_DIPThetagal4_fruFLP_uas_stop_mcd8gfp female2
	DIP theta female brain 4	present	absent	present	present	present	present	present	absent	absent			N9	4-7day_DIPThetagal4_fruFLP_uas_stop_mcd8gfp female1
	DIP theta female brain 5	absent	absent	present	present	present	present	present	absent	absent			P4	4-7day_DIPThetagal4_fruFLP_uas_stop_mcd8gfp female5
	Numerical Scoring Observation	0.2	0	1	1	1	1	1	0	0
	DIP theta female VNC 1										NA	NA	AA1	4-7day_DIPthetagal4_fruFLP_uas_stop_mcd8gfp female VNC 1
	DIP theta female VNC 2										NA	absent	CC2	4-7day_DIPthetagal4_fruFLP_uas_stop_mcd8gfp female VNC 5
	DIP theta female VNC 3										absent	absent	EE2	4-7day_DIPthetagal4_fruFLP_uas_stop_mcd8gfp female VNC 3
	DIP theta female VNC 4										absent	absent	GG0	4-7day_DIPthetagal4_fruFLP_uas_stop_mcd8gfp female VNC 4
	DIP theta female VNC 5										absent	absent	GG9	4-7day_DIPthetagal4_fruFLP_uas_stop_mcd8gfp female VNC 2
	Numerical Scoring Observation										0	0
	DIP theta male brain 1	present	present	present	present	present	present	absent	absent	absent			K8	4-7day_DIPThetagal4_fruFLP_uas_stop_mcd8gfp male4
	DIP theta male brain 2	present	present	present	present	present	present	absent	absent	absent			L3	4-7day_DIPThetagal4_fruFLP_uas_stop_mcd8gfp male3
	DIP theta male brain 3	present	present	present	present	present	present	absent	absent	absent			P5	4-7day_DIPThetagal4_fruFLP_uas_stop_mcd8gfp male2
	DIP theta male brain 4	present	present	present	present	present	present	absent	absent	absent			Q7	4-7day_DIPThetagal4_fruFLP_uas_stop_mcd8gfp male1
	DIP theta male brain 5	present	present	present	present	present	present	absent	absent	absent			R3	4-7day_DIPThetagal4_fruFLP_uas_stop_mcd8gfp male7
	Numerical Scoring Observation	1	1	1	1	1	1	0	0	0
	DIP theta male VNC 1										present	present	CC8	4-7day_DIPthetagal4_fruFLP_uas_stop_mcd8gfp male VNC 5
	DIP theta male VNC 2										present	present	DD1	4-7day_DIPthetagal4_fruFLP_uas_stop_mcd8gfp male VNC 7
	DIP theta male VNC 3										present	present	DD7	4-7day_DIPthetagal4_fruFLP_uas_stop_mcd8gfp male VNC 3
	DIP theta male VNC 4										present	present	EE9	4-7day_DIPthetagal4_fruFLP_uas_stop_mcd8gfp male VNC 4
	DIP theta male VNC 5										present	present	GG2	4-7day_DIPthetagal4_fruFLP_uas_stop_mcd8gfp male VNC 8
	Numerical Scoring Observation										1	1
	DIP zeta female brain 1	absent	present	present	present	present	present	present	absent	absent			L0	4-7day_DIPZetagal4_fruFLP_uas_stop_mcd8gfp female6
	DIP zeta female brain 2	absent	absent	present	present	present	present	absent	absent	absent			M9	4-7day_DIPZetagal4_fruFLP_uas_stop_mcd8gfp female1
	DIP zeta female brain 3	absent	absent	present	present	present	present	absent	absent	absent			N1	4-7day_DIPZetagal4_fruFLP_uas_stop_mcd8gfp female2
	DIP zeta female brain 4	absent	absent	present	present	present	absent	absent	absent	absent			Q4	4-7day_DIPZetagal4_fruFLP_uas_stop_mcd8gfp female4
	DIP zeta female brain 5	absent	absent	present	present	present	absent	absent	absent	absent			R1	4-7day_DIPZetagal4_fruFLP_uas_stop_mcd8gfp female3
	Numerical Scoring Observation	0	0.2	1	1	1	0.6	0.2	0	0
	DIP zeta female VNC 1										NA	NA	BB5	DIPzeta_Female_VNC_3
	DIP zeta female VNC 2										NA	absent	DD2	DIPzeta_Female_VNC_2
	DIP zeta female VNC 3										absent	absent	GG3	DIPzeta_Female_VNC_4
	DIP zeta female VNC 4										present	absent	HH4	DIPzeta_Female_VNC_1
	DIP zeta female VNC 5										absent	absent	HH8	DIPzeta_Female_VNC_5
	Numerical Scoring Observation										0.333333	0
	DIP zeta male brain 1	absent	present	present	present	present	absent	absent	absent	absent			J4	4-7day_DIPZetagal4_fruFLP_uas_stop_mcd8gfp male2
	DIP zeta male brain 2	absent	present	NA	present	NA	NA	absent	absent	absent			J6	4-7day_DIPZetagal4_fruFLP_uas_stop_mcd8gfp male4
	DIP zeta male brain 3	present	present	present	present	present	absent	absent	absent	absent			Q8	4-7day_DIPZetagal4_fruFLP_uas_stop_mcd8gfp male1
	DIP zeta male brain 4	absent	absent	present	present	present	present	absent	absent	absent			R2	4-7day_DIPZetagal4_fruFLP_uas_stop_mcd8gfp male3
	DIP zeta male brain 5	absent	present	present	present	present	absent	absent	absent	absent			R7	4-7day_DIPZetagal4_fruFLP_uas_stop_mcd8gfp male5
	Numerical Scoring Observation	0.2	0.8	1	1	1	0.25	0	0	0
	DIP zeta male VNC 1										absent	absent	EE0	DIPzeta_male_VNC_1
	DIP zeta male VNC 2										present	present	EE7	DIPzeta_male_VNC_4
	DIP zeta male VNC 3										NA	NA	FF3	DIPzeta_male_VNC_2
	DIP zeta male VNC 4										absent	absent	FF7	DIPzeta_male_VNC_5
	DIP zeta male VNC 5										present	absent	GG1	DIPzeta_male_VNC_3
	Numerical Scoring Observation										0.5	0.25
	dpr 1 female brain 1	absent	absent	present	present	present	present	present	present	absent			I7	4-7day_dpr1gal4_fruFLP_uas_stop_mcd8gfp female
	dpr 1 female brain 2	absent	absent	present	present	present	absent	present	present	absent			J9	4-7day_dpr1gal4_fruFLP_uas_stop_mcd8gfp female 2
	dpr 1 female brain 3	absent	present	present	present	present	present	present	present	absent			F2	4-7day_dpr1gal4_fruFLP_uas_stop_mcd8gfp female 3
	dpr 1 female brain 4	absent	absent	present	present	present	present	present	present	absent			K8	4-7day_dpr1gal4_fruFLP_uas_stop_mcd8gfp female 4
	dpr 1 female brain 5	absent	absent	present	present	present	present	present	present	absent			H6	4-7day_dpr1gal4_fruFLP_uas_stop_mcd8gfp female 5
	Numerical Scoring Observation	0	0.2	1	1	1	0.8	1	1	0
	dpr 1 female VNC 1										absent	absent	K6	4-7day_dpr1gal4_fruFLP_uas_stop_mcd8gfp female VNC
	dpr 1 female VNC 2										absent	absent	J7	4-7day_dpr1gal4_fruFLP_uas_stop_mcd8gfp female VNC 2
	dpr 1 female VNC 3										absent	absent	H9	4-7day_dpr1gal4_fruFLP_uas_stop_mcd8gfp female VNC 3
	dpr 1 female VNC 4										absent	absent	A1	4-7day_dpr1gal4_fruFLP_uas_stop_mcd8gfp female VNC 4
	dpr 1 female VNC 5										absent	absent	O8	4-7day_dpr1gal4_fruFLP_uas_stop_mcd8gfp female VNC 5
	Numerical Scoring Observation										0	0
	dpr 1 male brain 1	absent	present	present	present	present	present	present	present	absent			K1	4-7day_dpr1gal4_fruFLP_uas_stop_mcd8gfp male
	dpr 1 male brain 2	absent	present	present	present	present	present	present	present	absent			K7	4-7day_dpr1gal4_fruFLP_uas_stop_mcd8gfp male 2
	dpr 1 male brain 3	absent	present	present	present	present	present	present	present	absent			D2	4-7day_dpr1gal4_fruFLP_uas_stop_mcd8gfp male 3
	dpr 1 male brain 4	absent	present	present	present	present	present	present	present	absent			B1	4-7day_dpr1gal4_fruFLP_uas_stop_mcd8gfp male 4
	dpr 1 male brain 5	absent	present	present	present	present	present	present	present	absent			O2	4-7day_dpr1gal4_fruFLP_uas_stop_mcd8gfp male 5
	Numerical Scoring Observation	0	1	1	1	1	1	1	1	0
	dpr 1 male VNC 1										present	present	L1	4-7day_dpr1gal4_fruFLP_uas_stop_mcd8gfp male VNC
	dpr 1 male VNC 2										present	present	H5	4-7day_dpr1gal4_fruFLP_uas_stop_mcd8gfp male VNC 2
	dpr 1 male VNC 3										present	present	P3	4-7day_dpr1gal4_fruFLP_uas_stop_mcd8gfp male VNC 3
	dpr 1 male VNC 4										present	present	M3	4-7day_dpr1gal4_fruFLP_uas_stop_mcd8gfp male VNC 4
	dpr 1 male VNC 5										present	present	C2	4-7day_dpr1gal4_fruFLP_uas_stop_mcd8gfp male VNC 5
	Numerical Scoring Observation										1	1
	dpr 2 female brain 1	present	present	present	present	present	present	present	present	absent			BS_A3	4-7day_dpr2gal4_fruFLP_uas_stop_mcd8gfp female 2
	dpr 2 female brain 2	absent	absent	present	present	present	present	present	present	absent			BS_D5	4-7day_dpr2gal4_fruFLP_uas_stop_mcd8gfp female 5
	dpr 2 female brain 3	absent	present	present	present	present	present	present	present	absent			BS_E1	4-7day_dpr2gal4_fruFLP_uas_stop_mcd8gfp female 4
	dpr 2 female brain 4	absent	absent	present	present	present	present	present	present	absent			BS_Q4	4-7day_dpr2gal4_fruFLP_uas_stop_mcd8gfp female 3
	dpr 2 female brain 5	present	present	present	present	present	present	present	present	absent			BS_S7	4-7day_dpr2gal4_fruFLP_uas_stop_mcd8gfp female
	Numerical Scoring Observation	0.4	0.6	1	1	1	1	1	1	0
	dpr 2 female VNC 1										absent	absent	BS_B2	4-7day_dpr2gal4_fruFLP_uas_stop_mcd8gfp female VNC
	dpr 2 female VNC 2										absent	absent	BS_E3	4-7day_dpr2gal4_fruFLP_uas_stop_mcd8gfp female VNC 3
	dpr 2 female VNC 3										absent	absent	BS_E9	4-7day_dpr2gal4_fruFLP_uas_stop_mcd8gfp female VNC 2
	dpr 2 female VNC 4										absent	absent	BS_O5	4-7day_dpr2gal4_fruFLP_uas_stop_mcd8gfp female VNC 5
	dpr 2 female VNC 5										absent	absent	BS_T4	4-7day_dpr2gal4_fruFLP_uas_stop_mcd8gfp female VNC 4
	Numerical Scoring Observation										0	0
	dpr 2 male brain 1	absent	present	present	present	present	present	present	present	absent			BS_A5	4-7day_dpr2gal4_fruFLP_uas_stop_mcd8gfp male 6
	dpr 2 male brain 2	absent	present	present	present	present	present	present	present	absent			BS_F1	4-7day_dpr2gal4_fruFLP_uas_stop_mcd8gfp male 2
	dpr 2 male brain 3	present	present	present	present	present	present	present	present	absent			BS_O8	4-7day_dpr2gal4_fruFLP_uas_stop_mcd8gfp male 5
	dpr 2 male brain 4	absent	present	present	present	present	present	present	present	absent			BS_P4	4-7day_dpr2gal4_fruFLP_uas_stop_mcd8gfp male 3
	dpr 2 male brain 5	absent	present	present	present	present	present	present	present	absent			BS_Q6	4-7day_dpr2gal4_fruFLP_uas_stop_mcd8gfp male
	Numerical Scoring Observation	0.2	1	1	1	1	1	1	1	0
	dpr 2 male VNC 1										present	present	BS_B1	4-7day_dpr2gal4_fruFLP_uas_stop_mcd8gfp male VNC
	dpr 2 male VNC 2										absent	absent	BS_C4	4-7day_dpr2gal4_fruFLP_uas_stop_mcd8gfp male VNC 4
	dpr 2 male VNC 3										present	present	BS_M5	4-7day_dpr2gal4_fruFLP_uas_stop_mcd8gfp male VNC 3
	dpr 2 male VNC 4										present	present	BS_O9	4-7day_dpr2gal4_fruFLP_uas_stop_mcd8gfp male VNC 5
	dpr 2 male VNC 5										present	present	BS_R7	4-7day_dpr2gal4_fruFLP_uas_stop_mcd8gfp male VNC 2
	Numerical Scoring Observation										0.8	0.8
	dpr 3 female brain 1	absent	absent	present	present	present	present	present	present	absent			H2	4-7day_dpr3gal4_fruFLP_uas_stop_mcd8gfp female
	dpr 3 female brain 2	absent	absent	present	present	present	present	present	present	absent			I8	4-7day_dpr3gal4_fruFLP_uas_stop_mcd8gfp female 2
	dpr 3 female brain 3	absent	absent	present	present	present	present	present	present	absent			L8	4-7day_dpr3gal4_fruFLP_uas_stop_mcd8gfp female 3
	dpr 3 female brain 4	absent	absent	present	present	present	present	present	present	absent			N3	4-7day_dpr3gal4_fruFLP_uas_stop_mcd8gfp female 4
	dpr 3 female brain 5	absent	absent	present	present	present	absent	present	present	absent			D5	4-7day_dpr3gal4_fruFLP_uas_stop_mcd8gfp female 5
	Numerical Scoring Observation	0	0	1	1	1	0.8	1	1	0
	dpr 3 female VNC 1										absent	absent	L2	4-7day_dpr3gal4_fruFLP_uas_stop_mcd8gfp female VNC
	dpr 3 female VNC 2										absent	absent	M2	4-7day_dpr3gal4_fruFLP_uas_stop_mcd8gfp female VNC 2
	dpr 3 female VNC 3										absent	absent	G6	4-7day_dpr3gal4_fruFLP_uas_stop_mcd8gfp female VNC 3
	dpr 3 female VNC 4										absent	absent	M6	4-7day_dpr3gal4_fruFLP_uas_stop_mcd8gfp female VNC 4
	dpr 3 female VNC 5										absent	absent	F1	4-7day_dpr3gal4_fruFLP_uas_stop_mcd8gfp female VNC 5
	Numerical Scoring Observation										0	0
	dpr 3 male brain 1	absent	present	present	present	present	present	present	present	absent			D9	4-7day_dpr3gal4_fruFLP_uas_stop_mcd8gfp male
	dpr 3 male brain 2	absent	present	present	present	present	present	absent	absent	absent			R1	4-7day_dpr3gal4_fruFLP_uas_stop_mcd8gfp male 2
	dpr 3 male brain 3	absent	present	NA	present	present	present	absent	absent	absent			G8	4-7day_dpr3gal4_fruFLP_uas_stop_mcd8gfp male 3
	dpr 3 male brain 4	absent	present	present	present	present	present	absent	absent	absent			E9	4-7day_dpr3gal4_fruFLP_uas_stop_mcd8gfp male 4
	dpr 3 male brain 5	absent	absent	present	present	present	present	absent	absent	absent			N7	4-7day_dpr3gal4_fruFLP_uas_stop_mcd8gfp male 5
	Numerical Scoring Observation	0	0.8	1	1	1	1	0.2	0.2	0
	dpr 3 male VNC 1										present	absent	C5	4-7day_dpr3gal4_fruFLP_uas_stop_mcd8gfp male VNC
	dpr 3 male VNC 2										present	absent	A4	4-7day_dpr3gal4_fruFLP_uas_stop_mcd8gfp male VNC 2
	dpr 3 male VNC 3										present	present	I5	4-7day_dpr3gal4_fruFLP_uas_stop_mcd8gfp male VNC 3
	dpr 3 male VNC 4										present	present	F4	4-7day_dpr3gal4_fruFLP_uas_stop_mcd8gfp male VNC 4
	dpr 3 male VNC 5										present	absent	H4	4-7day_dpr3gal4_fruFLP_uas_stop_mcd8gfp male VNC 5
	Numerical Scoring Observation										1	0.4
	dpr 4 female brain 1	absent	present	present	absent	absent	absent	present	present	present			BS_M7	4-7daysDpr4GAL4_UASstopsmGDPmycstop_FruFLP female
	dpr 4 female brain 2	absent	absent	present	absent	absent	absent	present	present	present			BS_B3	4-7daysDpr4GAL4_UASstopsmGDPmycstop_FruFLP female 5
	dpr 4 female brain 3	absent	absent	present	present	present	present	present	present	present			BS_B7	4-7daysDpr4GAL4_UASstopsmGDPmycstop_FruFLP female 2
	dpr 4 female brain 4	absent	present	present	present	absent	absent	present	present	present			BS_C5	4-7daysDpr4GAL4_UASstopsmGDPmycstop_FruFLP female 4
	dpr 4 female brain 5	absent	present	present	present	present	present	present	present	present			BS_H5	4-7daysDpr4GAL4_UASstopsmGDPmycstop_FruFLP female 3
	Numerical Scoring Observation	0	0.6	1	0.6	0.4	0.4	1	1	1
	dpr 4 female VNC 1										present	present	BS_J4	4-7daysDpr4GAL4_UASstopsmGDPmycstop_FruFLP female VNC 4
	dpr 4 female VNC 2										absent	absent	BS_J5	4-7daysDpr4GAL4_UASstopsmGDPmycstop_FruFLP female VNC 7
	dpr 4 female VNC 3										present	absent	BS_O4	4-7daysDpr4GAL4_UASstopsmGDPmycstop_FruFLP female VNC 5
	dpr 4 female VNC 4										absent	absent	BS_Q7	4-7daysDpr4GAL4_UASstopsmGDPmycstop_FruFLP female VNC 3
	dpr 4 female VNC 5										absent	absent	BS_T2	4-7daysDpr4GAL4_UASstopsmGDPmycstop_FruFLP female VNC 6
	Numerical Scoring Observation										0.4	0.2
	dpr 4 male brain 1	absent	present	present	present	present	present	absent	absent	present			BS_C2	4-7daysDpr4GAL4_UASstopsmGDPmycstop_FruFLP male 6
	dpr 4 male brain 2	absent	present	present	present	present	present	present	present	present			BS_F7	4-7daysDpr4GAL4_UASstopsmGDPmycstop_FruFLP male
	dpr 4 male brain 3	present	present	present	present	present	present	present	present	present			BS_M9	4-7daysDpr4GAL4_UASstopsmGDPmycstop_FruFLP male 3
	dpr 4 male brain 4	present	present	present	present	present	present	present	present	present			BS_N7	4-7daysDpr4GAL4_UASstopsmGDPmycstop_FruFLP male 4
	dpr 4 male brain 5	absent	present	present	present	present	present	present	present	present			BS_R4	4-7daysDpr4GAL4_UASstopsmGDPmycstop_FruFLP male 5
	Numerical Scoring Observation	0.4	1	1	1	1	1	0.8	0.8	1
	dpr 4 male VNC 1										present	present	BS_B8	4-7daysDpr4GAL4_UASstopsmGDPmycstop_FruFLP male VNC 4
	dpr 4 male VNC 2										present	present	BS_C7	4-7daysDpr4GAL4_UASstopsmGDPmycstop_FruFLP male VNC 6
	dpr 4 male VNC 3										absent	present	BS_G8	4-7daysDpr4GAL4_UASstopsmGDPmycstop_FruFLP male VNC 5
	dpr 4 male VNC 4										present	present	BS_J6	4-7daysDpr4GAL4_UASstopsmGDPmycstop_FruFLP male VNC 3
	dpr 4 male VNC 5										present	present	BS_P5	4-7daysDpr4GAL4_UASstopsmGDPmycstop_FruFLP male VNC
	Numerical Scoring Observation										0.8	1
	dpr 5 female brain 1	absent	present	present	present	present	present	present	absent	present			BS_E4	6d_female_dpr5_55810_fruflp_3_20180919
	dpr 5 female brain 2	absent	present	present	present	present	present	present	absent	present			BS_H7	6d_female_dpr5_55810_fruflp_6_20180919
	dpr 5 female brain 3	absent	absent	present	present	present	present	present	absent	present			BS_K3	6d_female_dpr5_55810_fruflp_4_20180919
	dpr 5 female brain 4	absent	absent	present	absent	present	absent	present	absent	present			BS_Q8	6d_female_dpr5_55810_fruflp_5_20180919
	dpr 5 female brain 5	absent	absent	present	present	present	present	present	absent	present			BS_R8	6d_female_dpr5_55810_fruflp_7.1_20180919
	Numerical Scoring Observation	0	0.4	1	0.8	1	0.8	1	0	1
	dpr 5 female VNC 1										absent	absent	BS_F8	6d_female_dpr5_VNC_55810_fruflp_5_20181002
	dpr 5 female VNC 2										absent	absent	BS_K4	6d_female_dpr5_VNC_55810_fruflp_2_20181002
	dpr 5 female VNC 3										absent	absent	BS_O3	6d_female_dpr5_VNC_55810_fruflp_7_20181002
	dpr 5 female VNC 4										absent	absent	BS_P3	6d_female_dpr5_VNC_55810_fruflp_6_20181002
	dpr 5 female VNC 5										absent	absent	BS_S2	6d_female_dpr5_VNC_55810_fruflp_4_20181002
	Numerical Scoring Observation										0	0
	dpr 5 male brain 1	absent	present	present	present	present	present	present	absent	present			BS_C9	6d_male_dpr5_55810_fruflp_5_20180919
	dpr 5 male brain 2	absent	present	present	present	present	present	present	absent	present			BS_E5	6d_male_dpr5_55810_fruflp_4_20180919
	dpr 5 male brain 3	absent	absent	present	present	present	present	present	absent	present			BS_J2	6d_male_dpr5_55810_fruflp_1_20180919
	dpr 5 male brain 4	present	present	present	present	present	present	present	absent	present			BS_J8	6d_male_dpr5_55810_fruflp_2_20180919
	dpr 5 male brain 5	absent	present	present	present	present	present	present	absent	present			BS_N4	6d_male_dpr5_55810_fruflp_3_20180919
	Numerical Scoring Observation	0.2	0.8	1	1	1	1	1	0	1
	dpr 5 male VNC 1										present	present	BS_A6	7d_male_dpr5_VNC_55810_fruflp_5_20190218
	dpr 5 male VNC 2										present	present	BS_F4	7d_male_dpr5_VNC_55810_fruflp_4_20190218
	dpr 5 male VNC 3										present	present	BS_J3	6d_male_dpr5_VNC_55810_fruflp_2_20181002
	dpr 5 male VNC 4										present	present	BS_Q3	6d_male_dpr5_VNC_55810_fruflp_1_20181002
	dpr 5 male VNC 5										present	present	BS_Q5	6d_male_dpr5_VNC_55810_fruflp_3_20181002
	Numerical Scoring Observation										1	1
	dpr 6 female brain 1	absent	present	present	present	present	present	absent	absent	absent			BS_D2	4-7day_dpr6gal4_fruFLP_uas_stop_mcd8gfp female 4
	dpr 6 female brain 2	absent	present	present	present	present	present	absent	absent	absent			BS_E2	4-7day_dpr6gal4_fruFLP_uas_stop_mcd8gfp female 3
	dpr 6 female brain 3	absent	present	present	present	present	present	absent	absent	absent			BS_H8	4-7day_dpr6gal4_fruFLP_uas_stop_mcd8gfp female 5
	dpr 6 female brain 4	absent	present	present	present	present	present	absent	absent	absent			BS_N9	4-7day_dpr6gal4_fruFLP_uas_stop_mcd8gfp female
	dpr 6 female brain 5	absent	present	present	present	present	present	absent	absent	absent			BS_T3	4-7day_dpr6gal4_fruFLP_uas_stop_mcd8gfp female 2
	Numerical Scoring Observation	0	1	1	1	1	1	0	0	0
	dpr 6 female VNC 1										absent	absent	BS_D3	4-7day_dpr6gal4_fruFLP_uas_stop_mcd8gfp female VNC 3
	dpr 6 female VNC 2										absent	absent	BS_D8	4-7day_dpr6gal4_fruFLP_uas_stop_mcd8gfp female VNC 7
	dpr 6 female VNC 3										absent	absent	BS_G1	4-7day_dpr6gal4_fruFLP_uas_stop_mcd8gfp female VNC
	dpr 6 female VNC 4										absent	absent	BS_G4	4-7day_dpr6gal4_fruFLP_uas_stop_mcd8gfp female VNC 4
	dpr 6 female VNC 5										absent	absent	BS_G9	4-7day_dpr6gal4_fruFLP_uas_stop_mcd8gfp female VNC 6
	Numerical Scoring Observation										0	0
	dpr 6 male brain 1	NA	present	present	present	present	present	absent	absent	absent			BS_F5	4-7day_dpr6gal4_fruFLP_uas_stop_mcd8gfp male 5
	dpr 6 male brain 2	present	present	present	present	present	present	absent	absent	absent			BS_F9	4-7day_dpr6gal4_fruFLP_uas_stop_mcd8gfp male 3
	dpr 6 male brain 3	present	present	present	present	present	present	absent	absent	absent			BS_R3	4-7day_dpr6gal4_fruFLP_uas_stop_mcd8gfp male 4
	dpr 6 male brain 4	present	present	present	present	present	present	absent	absent	absent			BS_R6	4-7day_dpr6gal4_fruFLP_uas_stop_mcd8gfp male 7
	dpr 6 male brain 5	present	present	present	present	present	present	absent	absent	absent			BS_S4	4-7day_dpr6gal4_fruFLP_uas_stop_mcd8gfp male 2
	Numerical Scoring Observation	1	1	1	1	1	1	0	0	0
	dpr 6 male VNC 1										absent	present	BS_A7	4-7day_dpr6gal4_fruFLP_uas_stop_mcd8gfp male VNC 4
	dpr 6 male VNC 2										present	present	BS_F6	4-7day_dpr6gal4_fruFLP_uas_stop_mcd8gfp male VNC 3
	dpr 6 male VNC 3										absent	absent	BS_K2	4-7day_dpr6gal4_fruFLP_uas_stop_mcd8gfp male VNC
	dpr 6 male VNC 4										present	present	BS_O1	4-7day_dpr6gal4_fruFLP_uas_stop_mcd8gfp male VNC 5
	dpr 6 male VNC 5										present	present	BS_P8	4-7day_dpr6gal4_fruFLP_uas_stop_mcd8gfp male VNC 2
	Numerical Scoring Observation										0.6	0.8
	dpr 8 female brain 1	absent	absent	present	present	present	present	present	present	present			K9	4-7day_dpr8gal4_fruFLP_uas_stop_mcd8gfp female
	dpr 8 female brain 2	absent	absent	present	present	present	absent	present	present	present			P2	4-7day_dpr8gal4_fruFLP_uas_stop_mcd8gfp female 2
	dpr 8 female brain 3	absent	absent	present	present	present	absent	present	present	present			Q9	4-7day_dpr8gal4_fruFLP_uas_stop_mcd8gfp female 3
	dpr 8 female brain 4	absent	absent	present	present	present	present	present	present	present			B2	4-7day_dpr8gal4_fruFLP_uas_stop_mcd8gfp female 4
	dpr 8 female brain 5	absent	absent	present	present	present	present	present	present	present			B4	4-7day_dpr8gal4_fruFLP_uas_stop_mcd8gfp female 5
	Numerical Scoring Observation	0	0	1	1	1	0.6	1	1	1
	dpr 8 female VNC 1										absent	absent	M5	4-7day_dpr8gal4_fruFLP_uas_stop_mcd8gfp female VNC
	dpr 8 female VNC 2										absent	absent	O7	4-7day_dpr8gal4_fruFLP_uas_stop_mcd8gfp female VNC 2
	dpr 8 female VNC 3										absent	absent	D1	4-7day_dpr8gal4_fruFLP_uas_stop_mcd8gfp female VNC 3
	dpr 8 female VNC 4										absent	present	G3	4-7day_dpr8gal4_fruFLP_uas_stop_mcd8gfp female VNC 4
	dpr 8 female VNC 5										absent	absent	C4	4-7day_dpr8gal4_fruFLP_uas_stop_mcd8gfp female VNC 5
	Numerical Scoring Observation										0	0.2
	dpr 8 male brain 1	absent	present	present	present	present	present	absent	absent	present			B3	4-7day_dpr8gal4_fruFLP_uas_stop_mcd8gfp male
	dpr 8 male brain 2	absent	present	present	present	present	present	absent	absent	present			D7	4-7day_dpr8gal4_fruFLP_uas_stop_mcd8gfp male 2
	dpr 8 male brain 3	absent	present	present	present	present	present	absent	absent	present			M8	4-7day_dpr8gal4_fruFLP_uas_stop_mcd8gfp male 3
	dpr 8 male brain 4	present	present	present	present	present	present	absent	absent	present			D6	4-7day_dpr8gal4_fruFLP_uas_stop_mcd8gfp male 4
	dpr 8 male brain 5	absent	present	present	present	present	present	present	absent	present			H8	4-7day_dpr8gal4_fruFLP_uas_stop_mcd8gfp male 5
	Numerical Scoring Observation	0.2	1	1	1	1	1	0.2	0	1
	dpr 8 male VNC 1										present	present	G4	4-7day_dpr8gal4_fruFLP_uas_stop_mcd8gfp male VNC
	dpr 8 male VNC 2										present	absent	A7	4-7day_dpr8gal4_fruFLP_uas_stop_mcd8gfp male VNC 2
	dpr 8 male VNC 3										NA	present	P1	4-7day_dpr8gal4_fruFLP_uas_stop_mcd8gfp male VNC 3
	dpr 8 male VNC 4										present	present	A5	4-7day_dpr8gal4_fruFLP_uas_stop_mcd8gfp male VNC 4
	dpr 8 male VNC 5										present	present	N9	4-7day_dpr8gal4_fruFLP_uas_stop_mcd8gfp male VNC 5
	Numerical Scoring Observation										1	0.8
	dpr 9 female brain 1	absent	present	present	present	present	present	present	present	present			BS_A8	4-7day_dpr9gal4_fruFLP_uas_stop_mcd8gfp female 3
	dpr 9 female brain 2	absent	absent	present	present	present	present	present	present	present			BS_F3	4-7day_dpr9gal4_fruFLP_uas_stop_mcd8gfp female 5
	dpr 9 female brain 3	absent	present	present	present	present	present	present	present	present			BS_K6	4-7day_dpr9gal4_fruFLP_uas_stop_mcd8gfp female 4
	dpr 9 female brain 4	absent	present	present	present	present	present	present	present	present			BS_R1	4-7day_dpr9gal4_fruFLP_uas_stop_mcd8gfp female 2
	dpr 9 female brain 5	absent	present	present	present	present	present	present	absent	absent			BS_B5	4-7day_dpr9gal4_fruFLP_uas_stop_mcd8gfp female
	Numerical Scoring Observation	0	0.8	1	1	1	1	1	0.8	0.8
	dpr 9 female VNC 1										absent	absent	BS_C6	4-7day_dpr9gal4_fruFLP_uas_stop_mcd8gfp female VNC 3
	dpr 9 female VNC 2										absent	absent	BS_H1	4-7day_dpr9gal4_fruFLP_uas_stop_mcd8gfp female VNC
	dpr 9 female VNC 3										absent	absent	BS_N5	4-7day_dpr9gal4_fruFLP_uas_stop_mcd8gfp female VNC 2
	dpr 9 female VNC 4										absent	absent	BS_R2	4-7day_dpr9gal4_fruFLP_uas_stop_mcd8gfp female VNC 5
	dpr 9 female VNC 5										absent	absent	BS_R9	4-7day_dpr9gal4_fruFLP_uas_stop_mcd8gfp female VNC 4
	Numerical Scoring Observation										0	0
	dpr 9 male brain 1	present	present	present	present	present	present	present	present	absent			BS_B4	4-7day_dpr9gal4_fruFLP_uas_stop_mcd8gfp male 3
	dpr 9 male brain 2	present	present	present	present	present	present	present	absent	absent			BS_D6	4-7day_dpr9gal4_fruFLP_uas_stop_mcd8gfp male 2
	dpr 9 male brain 3	present	present	present	present	present	present	present	present	present			BS_G6	4-7day_dpr9gal4_fruFLP_uas_stop_mcd8gfp male 4
	dpr 9 male brain 4	absent	present	present	present	present	present	present	absent	present			BS_S5	4-7day_dpr9gal4_fruFLP_uas_stop_mcd8gfp male 7
	dpr 9 male brain 5	absent	present	present	absent	present	absent	present	absent	present			BS_S6	4-7day_dpr9gal4_fruFLP_uas_stop_mcd8gfp male 8
	Numerical Scoring Observation	0.6	1	1	0.8	1	0.8	1	0.4	0.6
	dpr 9 male VNC 1										present	present	BS_G5	4-7day_dpr9gal4_fruFLP_uas_stop_mcd8gfp male VNC 4
	dpr 9 male VNC 2										absent	absent	BS_J7	4-7day_dpr9gal4_fruFLP_uas_stop_mcd8gfp male VNC
	dpr 9 male VNC 3										present	present	BS_M6	4-7day_dpr9gal4_fruFLP_uas_stop_mcd8gfp male VNC 5
	dpr 9 male VNC 4										present	absent	BS_P7	4-7day_dpr9gal4_fruFLP_uas_stop_mcd8gfp male VNC 2
	dpr 9 male VNC 5										present	present	BS_Q9	4-7day_dpr9gal4_fruFLP_uas_stop_mcd8gfp male VNC 3
	Numerical Scoring Observation										0.8	0.6
	dpr 10 female brain 1	absent	absent	present	present	present	absent	present	absent	present			L4	4d_female_dpr10_55810_fruflp_1_20180917
	dpr 10 female brain 2	absent	present	present	present	present	present	present	present	present			E4	4d_female_dpr10_55810_fruflp_2_20180917
	dpr 10 female brain 3	absent	absent	present	present	present	absent	present	absent	present			Q2	4d_female_dpr10_55810_fruflp_3_20180917
	dpr 10 female brain 4	absent	absent	present	present	absent	absent	present	absent	present			M1	4d_female_dpr10_55810_fruflp_4_20180917
	dpr 10 female brain 5	absent	absent	NA	present	present	absent	present	absent	present			Q5	6d_female_dpr10_55810_fruflp_5_20180918
	Numerical Scoring Observation	0	0.2	1	1	0.8	0.2	1	0.2	1
	dpr 10 female VNC 1										absent	absent	P5	6d_female_dpr10_VNC_55810_fruflp_1_20181005
	dpr 10 female VNC 2										absent	absent	N6	6d_female_dpr10_VNC_55810_fruflp_2_20181005
	dpr 10 female VNC 3										absent	absent	M4	6d_female_dpr10_VNC_55810_fruflp_3_20181005
	dpr 10 female VNC 4										present	absent	J5	7d_female_dpr10_VNC_55810_fruflp_5_20190220
	dpr 10 female VNC 5										absent	absent	E8	7d_female_dpr10_VNC_55810_fruflp_6_20190220
	Numerical Scoring Observation										0.2	0
	dpr 10 male brain 1	absent	present	present	present	present	present	absent	absent	present			B8	4d_male_dpr10_55810_fruflp_1_20180917
	dpr 10 male brain 2	absent	present	present	present	present	present	absent	absent	present			H7	4d_male_dpr10_55810_fruflp_2_20180917
	dpr 10 male brain 3	absent	present	present	present	present	present	absent	absent	present			I2	7d_male_dpr10_55810_fruflp_4_20190217
	dpr 10 male brain 4	absent	present	present	present	present	present	absent	absent	present			B9	7d_male_dpr10_55810_fruflp_5_20190217
	dpr 10 male brain 5	absent	present	present	present	present	present	absent	absent	present			F3	7d_male_dpr10_55810_fruflp_6_20190217
	Numerical Scoring Observation	0	1	1	1	1	1	0	0	1
	dpr 10 male VNC 1										present	present	J1	6d_male_dpr10_VNC_55810_fruflp_1_20181023
	dpr 10 male VNC 2										NA	present	F9	6d_male_dpr10_VNC_55810_fruflp_2_20181023
	dpr 10 male VNC 3										present	present	D3	7d_male_dpr10_VNC_55810_fruflp_3_20190220
	dpr 10 male VNC 4										present	present	H1	7d_male_dpr10_VNC_55810_fruflp_5_20190220
	dpr 10 male VNC 5										present	present	Q8	7d_male_dpr10_VNC_55810_fruflp_6_20190220
	Numerical Scoring Observation										1	1
	dpr 11 female brain 1	absent	absent	present	present	present	present	present	present	absent			O4	4-7day_dpr11gal4_fruFLP_uas_stop_mcd8gfp female
	dpr 11 female brain 2	absent	absent	present	present	present	present	absent	present	absent			C8	4-7day_dpr11gal4_fruFLP_uas_stop_mcd8gfp female 2
	dpr 11 female brain 3	absent	absent	present	present	present	present	present	present	NA			H3	4-7day_dpr11gal4_fruFLP_uas_stop_mcd8gfp female 3
	dpr 11 female brain 4	absent	absent	present	present	present	present	present	present	absent			N5	4-7day_dpr11gal4_fruFLP_uas_stop_mcd8gfp female 4
	dpr 11 female brain 5	absent	absent	present	present	present	present	present	present	absent			R3	4-7day_dpr11gal4_fruFLP_uas_stop_mcd8gfp female 5
	Numerical Scoring Observation	0	0	1	1	1	1	0.8	1	0
	dpr 11 female VNC 1										absent	absent	Q3	4-7day_dpr11gal4_fruFLP_uas_stop_mcd8gfp female VNC
	dpr 11 female VNC 2										absent	absent	Q6	4-7day_dpr11gal4_fruFLP_uas_stop_mcd8gfp female VNC 2
	dpr 11 female VNC 3										absent	absent	O6	4-7day_dpr11gal4_fruFLP_uas_stop_mcd8gfp female VNC 3
	dpr 11 female VNC 4										absent	absent	L9	4-7day_dpr11gal4_fruFLP_uas_stop_mcd8gfp female VNC 4
	dpr 11 female VNC 5										absent	absent	Q4	4-7day_dpr11gal4_fruFLP_uas_stop_mcd8gfp female VNC 5
	Numerical Scoring Observation										0	0
	dpr 11 male brain 1	present	present	present	present	present	present	present	present	absent			E1	4-7day_dpr11gal4_fruFLP_uas_stop_mcd8gfp male
	dpr 11 male brain 2	present	present	present	present	present	present	present	present	absent			N2	4-7day_dpr11gal4_fruFLP_uas_stop_mcd8gfp male 2
	dpr 11 male brain 3	absent	present	present	present	present	present	present	present	absent			P8	4-7day_dpr11gal4_fruFLP_uas_stop_mcd8gfp male 3
	dpr 11 male brain 4	absent	present	present	present	present	present	present	present	absent			F6	4-7day_dpr11gal4_fruFLP_uas_stop_mcd8gfp male 4
	dpr 11 male brain 5	present	present	present	present	present	present	present	present	absent			G5	4-7day_dpr11gal4_fruFLP_uas_stop_mcd8gfp male 5
	Numerical Scoring Observation	0.6	1	1	1	1	1	1	1	0
	dpr 11 male VNC 1										present	present	I9	4-7day_dpr11gal4_fruFLP_uas_stop_mcd8gfp male VNC
	dpr 11 male VNC 2										absent	absent	K2	4-7day_dpr11gal4_fruFLP_uas_stop_mcd8gfp male VNC 2
	dpr 11 male VNC 3										present	present	Q7	4-7day_dpr11gal4_fruFLP_uas_stop_mcd8gfp male VNC 3
	dpr 11 male VNC 4										NA	NA	J3	4-7day_dpr11gal4_fruFLP_uas_stop_mcd8gfp male VNC 4
	dpr 11 male VNC 5										present	present	E2	4-7day_dpr11gal4_fruFLP_uas_stop_mcd8gfp male VNC 5
	Numerical Scoring Observation										0.75	0.75
	dpr 12 female brain 1	absent	absent	present	present	present	present	present	present	present			BS_B9	4-7day_dpr12gal4_fruFLP_uas_stop_mcd8gfp female 5
	dpr 12 female brain 2	absent	absent	present	present	present	present	present	present	present			BS_E8	4-7day_dpr12gal4_fruFLP_uas_stop_mcd8gfp female 4
	dpr 12 female brain 3	absent	absent	present	absent	present	absent	present	present	present			BS_S3	4-7day_dpr12gal4_fruFLP_uas_stop_mcd8gfp female
	dpr 12 female brain 4	absent	present	present	present	present	present	present	present	present			BS_T5	4-7day_dpr12gal4_fruFLP_uas_stop_mcd8gfp female 2
	dpr 12 female brain 5	absent	present	present	present	present	present	present	present	present			BS_T7	4-7day_dpr12gal4_fruFLP_uas_stop_mcd8gfp female 3
	Numerical Scoring Observation	0	0.4	1	0.8	1	0.8	1	1	1
	dpr 12 female VNC 1										absent	absent	BS_B6	4-7day_dpr12gal4_fruFLP_uas_stop_mcd8gfp female VNC 3
	dpr 12 female VNC 2										absent	absent	BS_C3	4-7day_dpr12gal4_fruFLP_uas_stop_mcd8gfp female VNC
	dpr 12 female VNC 3										absent	absent	BS_D7	4-7day_dpr12gal4_fruFLP_uas_stop_mcd8gfp female VNC 2
	dpr 12 female VNC 4										absent	absent	BS_N3	4-7day_dpr12gal4_fruFLP_uas_stop_mcd8gfp female VNC 5
	dpr 12 female VNC 5										absent	absent	BS_N6	4-7day_dpr12gal4_fruFLP_uas_stop_mcd8gfp female VNC 4
	Numerical Scoring Observation										0	0
	dpr 12 male brain 1	absent	present	present	present	present	present	absent	absent	present			BS_H2	4-7day_dpr12gal4_fruFLP_uas_stop_mcd8gfp male 5
	dpr 12 male brain 2	present	present	present	present	present	present	present	present	present			BS_P6	4-7day_dpr12gal4_fruFLP_uas_stop_mcd8gfp male v2
	dpr 12 male brain 3	present	present	present	present	present	present	present	absent	present			BS_R5	4-7day_dpr12gal4_fruFLP_uas_stop_mcd8gfp male 3
	dpr 12 male brain 4	present	present	present	present	present	present	present	absent	present			BS_S9	4-7day_dpr12gal4_fruFLP_uas_stop_mcd8gfp male 4
	dpr 12 male brain 5	present	present	present	present	present	present	present	absent	present			BS_G3	4-7day_dpr12gal4_fruFLP_uas_stop_mcd8gfp male
	Numerical Scoring Observation	0.8	1	1	1	1	1	0.8	0.2	1
	dpr 12 male VNC 1										present	present	BS_H3	4-7day_dpr12gal4_fruFLP_uas_stop_mcd8gfp male VNC 6
	dpr 12 male VNC 2										present	present	BS_H4	4-7day_dpr12gal4_fruFLP_uas_stop_mcd8gfp male VNC 5
	dpr 12 male VNC 3										present	present	BS_K5	4-7day_dpr12gal4_fruFLP_uas_stop_mcd8gfp male VNC 4
	dpr 12 male VNC 4										absent	present	BS_M4	4-7day_dpr12gal4_fruFLP_uas_stop_mcd8gfp male VNC 3
	dpr 12 male VNC 5										present	present	BS_N1	4-7day_dpr12gal4_fruFLP_uas_stop_mcd8gfp male VNC
	Numerical Scoring Observation										0.8	1
	dpr 14 female brain 1	absent	absent	present	present	absent	absent	absent	absent	present			C7	4-7daysDpr14GAL4_UASstopsmGDPmycstop_FruFLP female
	dpr 14 female brain 2	absent	absent	present	absent	absent	absent	present	absent	present			C9	4-7daysDpr14GAL4_UASstopsmGDPmycstop_FruFLP female 3
	dpr 14 female brain 3	absent	absent	present	present	absent	absent	present	absent	present			L5	4-7daysDpr14GAL4_UASstopsmGDPmycstop_FruFLP female 4
	dpr 14 female brain 4	absent	absent	present	present	present	absent	present	absent	present			I6	4-7daysDpr14GAL4_UASstopsmGDPmycstop_FruFLP female 5
	dpr 14 female brain 5	absent	absent	present	present	present	absent	present	absent	present			O5	4-7daysDpr14GAL4_UASstopsmGDPmycstop_FruFLP female 6
	Numerical Scoring Observation	0	0	1	0.8	0.4	0	0.8	0	1
	dpr 14 female VNC 1										absent	absent	I3	4-7daysDpr14GAL4_UASstopsmGDPmycstop_FruFLP female VNC
	dpr 14 female VNC 2										absent	absent	R4	4-7daysDpr14GAL4_UASstopsmGDPmycstop_FruFLP female VNC 2
	dpr 14 female VNC 3										absent	absent	G7	4-7daysDpr14GAL4_UASstopsmGDPmycstop_FruFLP female VNC 3
	dpr 14 female VNC 4										absent	absent	I1	4-7daysDpr14GAL4_UASstopsmGDPmycstop_FruFLP female VNC 4
	dpr 14 female VNC 5										absent	absent	F5	4-7daysDpr14GAL4_UASstopsmGDPmycstop_FruFLP female VNC 5
	Numerical Scoring Observation										0	0
	dpr 14 male brain 1	present	present	present	present	present	present	present	present	present			C3	4-7daysDpr14GAL4_UASstopsmGDPmycstop_FruFLP male 3
	dpr 14 male brain 2	absent	present	present	absent	absent	absent	absent	absent	present			G1	4-7daysDpr14GAL4_UASstopsmGDPmycstop_FruFLP male 4
	dpr 14 male brain 3	absent	present	present	absent	absent	absent	present	absent	present			M7	4-7daysDpr14GAL4_UASstopsmGDPmycstop_FruFLP male 5
	dpr 14 male brain 4	absent	present	present	present	present	present	absent	absent	present			C6	4-7daysDpr14GAL4_UASstopsmGDPmycstop_FruFLP male 6
	dpr 14 male brain 5	absent	present	present	absent	present	absent	absent	absent	present			E5	4-7daysDpr14GAL4_UASstopsmGDPmycstop_FruFLP male 7
	Numerical Scoring Observation	0.2	1	1	0.4	0.6	0.4	0.2	0.2	1
	dpr 14 male VNC 1										present	present	A8	4-7daysDpr14GAL4_UASstopsmGDPmycstop_FruFLP male VNC
	dpr 14 male VNC 2										absent	present	P6	4-7daysDpr14GAL4_UASstopsmGDPmycstop_FruFLP male VNC 2
	dpr 14 male VNC 3										present	present	J4	4-7daysDpr14GAL4_UASstopsmGDPmycstop_FruFLP male VNC 3
	dpr 14 male VNC 4										present	absent	F7	4-7daysDpr14GAL4_UASstopsmGDPmycstop_FruFLP male VNC 4
	dpr 14 male VNC 5										present	present	E3	4-7daysDpr14GAL4_UASstopsmGDPmycstop_FruFLP male VNC 5
	Numerical Scoring Observation										0.8	0.8
	dpr 15 female brain 1	absent	absent	present	present	present	absent	absent	absent	absent			O3	4-7day_dpr15gal4_fruFLP_uas_stop_mcd8gfp female
	dpr 15 female brain 2	absent	absent	NA	NA	NA	NA	absent	absent	absent			C1	4-7day_dpr15gal4_fruFLP_uas_stop_mcd8gfp female 2
	dpr 15 female brain 3	absent	absent	present	present	present	present	present	absent	absent			K5	4-7day_dpr15gal4_fruFLP_uas_stop_mcd8gfp female 3
	dpr 15 female brain 4	absent	absent	present	present	present	present	present	absent	absent			B5	4-7day_dpr15gal4_fruFLP_uas_stop_mcd8gfp female 4
	dpr 15 female brain 5	absent	absent	present	present	present	present	present	absent	absent			N1	4-7day_dpr15gal4_fruFLP_uas_stop_mcd8gfp female 5
	Numerical Scoring Observation	0	0	1	1	1	0.75	0.4	0	0
	dpr 15 female VNC 1										absent	absent	E6	4-7day_dpr15gal4_fruFLP_uas_stop_mcd8gfp female VNC
	dpr 15 female VNC 2										present	present	A3	4-7day_dpr15gal4_fruFLP_uas_stop_mcd8gfp female VNC 2
	dpr 15 female VNC 3										absent	absent	A9	4-7day_dpr15gal4_fruFLP_uas_stop_mcd8gfp female VNC 3
	dpr 15 female VNC 4										present	present	A6	4-7day_dpr15gal4_fruFLP_uas_stop_mcd8gfp female VNC 4
	dpr 15 female VNC 5										absent	absent	F8	4-7day_dpr15gal4_fruFLP_uas_stop_mcd8gfp female VNC 5
	Numerical Scoring Observation										0.4	0.4
	dpr 15 male brain 1	present	present	present	present	present	present	absent	absent	absent			I4	4-7day_dpr15gal4_fruFLP_uas_stop_mcd8gfp male
	dpr 15 male brain 2	absent	present	present	present	present	present	present	absent	absent			G9	4-7day_dpr15gal4_fruFLP_uas_stop_mcd8gfp male 2
	dpr 15 male brain 3	present	present	present	present	present	absent	absent	absent	absent			R5	4-7day_dpr15gal4_fruFLP_uas_stop_mcd8gfp male 4
	dpr 15 male brain 4	present	present	present	present	present	present	absent	absent	absent			O1	4-7day_dpr15gal4_fruFLP_uas_stop_mcd8gfp male 5
	dpr 15 male brain 5	present	present	present	present	present	present	present	absent	absent			B7	4-7day_dpr15gal4_fruFLP_uas_stop_mcd8gfp male 6
	Numerical Scoring Observation	0.8	1	1	1	1	0.8	0.2	0	0
	dpr 15 male VNC 1										present	present	N4	4-7day_dpr15gal4_fruFLP_uas_stop_mcd8gfp male VNC
	dpr 15 male VNC 2										present	present	J2	4-7day_dpr15gal4_fruFLP_uas_stop_mcd8gfp male VNC 2
	dpr 15 male VNC 3										present	present	P4	4-7day_dpr15gal4_fruFLP_uas_stop_mcd8gfp male VNC 3
	dpr 15 male VNC 4										present	present	J8	4-7day_dpr15gal4_fruFLP_uas_stop_mcd8gfp male VNC 4
	dpr 15 male VNC 5										absent	present	O9	4-7day_dpr15gal4_fruFLP_uas_stop_mcd8gfp male VNC 5
	Numerical Scoring Observation										0.8	1
	dpr 16 female brain 1	absent	present	present	present	present	present	absent	absent	absent			BS_D4	4-7day_dpr16gal4_fruFLP_uas_stop_mcd8gfp female 3
	dpr 16 female brain 2	absent	absent	present	present	present	present	absent	absent	absent			BS_K1	4-7day_dpr16gal4_fruFLP_uas_stop_mcd8gfp female 2
	dpr 16 female brain 3	absent	present	present	present	present	present	absent	absent	absent			BS_N8	4-7day_dpr16gal4_fruFLP_uas_stop_mcd8gfp female 6
	dpr 16 female brain 4	absent	absent	present	present	present	present	absent	absent	absent			BS_J1	4-7day_dpr16gal4_fruFLP_uas_stop_mcd8gfp female 4 v2
	dpr 16 female brain 5	absent	present	present	present	present	present	absent	absent	absent			BS_F2	4-7day_dpr16gal4_fruFLP_uas_stop_mcd8gfp female
	Numerical Scoring Observation	0	0.6	1	1	1	1	0	0	0
	dpr 16 female VNC 1										absent	present	BS_A2	4-7day_dpr16gal4_fruFLP_uas_stop_mcd8gfp female VNC 4
	dpr 16 female VNC 2										absent	absent	BS_G2	4-7day_dpr16gal4_fruFLP_uas_stop_mcd8gfp female VNC 5
	dpr 16 female VNC 3										absent	absent	BS_H6	4-7day_dpr16gal4_fruFLP_uas_stop_mcd8gfp female VNC 2
	dpr 16 female VNC 4										absent	absent	BS_M3	4-7day_dpr16gal4_fruFLP_uas_stop_mcd8gfp female VNC 3
	dpr 16 female VNC 5										present	present	BS_T6	4-7day_dpr16gal4_fruFLP_uas_stop_mcd8gfp female VNC
	Numerical Scoring Observation										0.2	0.4
	dpr 16 male brain 1	present	present	present	present	present	present	absent	absent	absent			BS_A9	4-7day_dpr16gal4_fruFLP_uas_stop_mcd8gfp male 2
	dpr 16 male brain 2	absent	present	present	present	present	present	absent	absent	absent			BS_K9	4-7day_dpr16gal4_fruFLP_uas_stop_mcd8gfp male 5
	dpr 16 male brain 3	present	present	present	present	present	present	absent	absent	absent			BS_M8	4-7day_dpr16gal4_fruFLP_uas_stop_mcd8gfp male 3
	dpr 16 male brain 4	present	present	present	present	present	present	absent	absent	absent			BS_N2	4-7day_dpr16gal4_fruFLP_uas_stop_mcd8gfp male
	dpr 16 male brain 5	present	present	present	present	present	present	absent	absent	absent			BS_T1	4-7day_dpr16gal4_fruFLP_uas_stop_mcd8gfp male 4
	Numerical Scoring Observation	0.8	1	1	1	1	1	0	0	0
	dpr 16 male VNC 1										present	present	BS_D1	4-7day_dpr16gal4_fruFLP_uas_stop_mcd8gfp male VNC 4
	dpr 16 male VNC 2										present	present	BS_H9	4-7day_dpr16gal4_fruFLP_uas_stop_mcd8gfp male VNC 2
	dpr 16 male VNC 3										absent	present	BS_K8	4-7day_dpr16gal4_fruFLP_uas_stop_mcd8gfp male VNC 3
	dpr 16 male VNC 4										absent	present	BS_P2	4-7day_dpr16gal4_fruFLP_uas_stop_mcd8gfp male VNC 5
	dpr 16 male VNC 5										present	present	BS_S1	4-7day_dpr16gal4_fruFLP_uas_stop_mcd8gfp male VNC
	Numerical Scoring Observation										0.6	1
	dpr 17 female brain 1	absent	absent	present	present	present	present	present	absent	absent			K3	4-7day_dpr17gal4_fruFLP_uas_stop_mcd8gfp female 2
	dpr 17 female brain 2	absent	absent	present	present	present	present	present	absent	absent			M9	4-7day_dpr17gal4_fruFLP_uas_stop_mcd8gfp female 3
	dpr 17 female brain 3	absent	absent	present	present	present	present	absent	absent	absent			P9	4-7day_dpr17gal4_fruFLP_uas_stop_mcd8gfp female 4
	dpr 17 female brain 4	absent	absent	present	present	present	present	present	absent	absent			G2	4-7day_dpr17gal4_fruFLP_uas_stop_mcd8gfp female 5
	dpr 17 female brain 5	absent	absent	present	present	absent	present	present	absent	absent			B6	4-7day_dpr17gal4_fruFLP_uas_stop_mcd8gfp female 6
	Numerical Scoring Observation	0	0	1	1	0.8	1	0.8	0	0
	dpr 17 female VNC 1										absent	absent	A2	4-7day_dpr17gal4_fruFLP_uas_stop_mcd8gfp female VNC
	dpr 17 female VNC 2										absent	absent	L7	4-7day_dpr17gal4_fruFLP_uas_stop_mcd8gfp female VNC 2
	dpr 17 female VNC 3										absent	absent	Q1	4-7day_dpr17gal4_fruFLP_uas_stop_mcd8gfp female VNC 3
	dpr 17 female VNC 4										absent	absent	L3	4-7day_dpr17gal4_fruFLP_uas_stop_mcd8gfp female VNC 4
	dpr 17 female VNC 5										absent	absent	P7	4-7day_dpr17gal4_fruFLP_uas_stop_mcd8gfp female VNC 5
	Numerical Scoring Observation										0	0
	dpr 17 male brain 1	absent	present	present	present	present	present	absent	absent	absent			J6	4-7day_dpr17gal4_fruFLP_uas_stop_mcd8gfp male
	dpr 17 male brain 2	absent	present	present	present	present	present	absent	absent	absent			E7	4-7day_dpr17gal4_fruFLP_uas_stop_mcd8gfp male 2
	dpr 17 male brain 3	absent	present	present	present	present	present	absent	absent	absent			D8	4-7day_dpr17gal4_fruFLP_uas_stop_mcd8gfp male 3
	dpr 17 male brain 4	absent	present	present	present	present	present	absent	absent	absent			R7	4-7day_dpr17gal4_fruFLP_uas_stop_mcd8gfp male 4
	dpr 17 male brain 5	absent	present	present	present	present	present	absent	absent	absent			R2	4-7day_dpr17gal4_fruFLP_uas_stop_mcd8gfp male 5
	Numerical Scoring Observation	0	1	1	1	1	1	0	0	0
	dpr 17 male VNC 1										absent	present	L6	4-7day_dpr17gal4_fruFLP_uas_stop_mcd8gfp male VNC
	dpr 17 male VNC 2										absent	present	R6	4-7day_dpr17gal4_fruFLP_uas_stop_mcd8gfp male VNC 2
	dpr 17 male VNC 3										present	present	N8	4-7day_dpr17gal4_fruFLP_uas_stop_mcd8gfp male VNC 3
	dpr 17 male VNC 4										present	present	K4	4-7day_dpr17gal4_fruFLP_uas_stop_mcd8gfp male VNC 4
	dpr 17 male VNC 5										absent	present	D4	4-7day_dpr17gal4_fruFLP_uas_stop_mcd8gfp male VNC 5
	Numerical Scoring Observation										0.4	1
	dpr 18 female brain 1	absent	absent	absent	present	present	present	absent	absent	absent			BS_J9	4-7daysDpr18GAL4_UASstopsmGDPmycstop_FruFLP female
	dpr 18 female brain 2	absent	present	present	present	present	present	absent	absent	absent			BS_K7	4-7daysDpr18GAL4_UASstopsmGDPmycstop_FruFLP female 5
	dpr 18 female brain 3	absent	absent	present	present	present	present	absent	absent	absent			BS_Q2	4-7daysDpr18GAL4_UASstopsmGDPmycstop_FruFLP female 2
	dpr 18 female brain 4	absent	absent	present	present	present	present	absent	absent	absent			BS_C8	4-7daysDpr18GAL4_UASstopsmGDPmycstop_FruFLP female 4
	dpr 18 female brain 5	present	present	present	present	present	present	absent	absent	absent			BS_G7	4-7daysDpr18GAL4_UASstopsmGDPmycstop_FruFLP female 3
	Numerical Scoring Observation	0.2	0.4	0.8	1	1	1	0	0	0
	dpr 18 female VNC 1										NA	absent	BS_A1	4-7daysDpr18GAL4_UASstopsmGDPmycstop_FruFLP female VNC
	dpr 18 female VNC 2										absent	absent	BS_A4	4-7daysDpr18GAL4_UASstopsmGDPmycstop_FruFLP female VNC 4
	dpr 18 female VNC 3										absent	absent	BS_O7	4-7daysDpr18GAL4_UASstopsmGDPmycstop_FruFLP female VNC 5
	dpr 18 female VNC 4										absent	absent	BS_P9	4-7daysDpr18GAL4_UASstopsmGDPmycstop_FruFLP female VNC 3
	dpr 18 female VNC 5										absent	absent	BS_Q1	4-7daysDpr18GAL4_UASstopsmGDPmycstop_FruFLP female VNC 2
	Numerical Scoring Observation										0	0
	dpr 18 male brain 1	present	present	present	present	present	present	absent	absent	absent			BS_D9	4-7daysDpr18GAL4_UASstopsmGDPmycstop_FruFLP male 4
	dpr 18 male brain 2	present	present	present	present	present	present	present	present	absent			BS_M1	4-7daysDpr18GAL4_UASstopsmGDPmycstop_FruFLP male 5
	dpr 18 male brain 3	present	present	present	present	present	present	absent	absent	absent			BS_M2	4-7daysDpr18GAL4_UASstopsmGDPmycstop_FruFLP male 6
	dpr 18 male brain 4	present	present	present	present	present	present	absent	absent	absent			BS_O2	4-7daysDpr18GAL4_UASstopsmGDPmycstop_FruFLP male 3
	dpr 18 male brain 5	absent	present	present	present	present	present	absent	absent	absent			BS_S8	4-7daysDpr18GAL4_UASstopsmGDPmycstop_FruFLP male
	Numerical Scoring Observation	0.8	1	1	1	1	1	0.2	0.2	0
	dpr 18 male VNC 1										absent	absent	BS_C1	4-7daysDpr18GAL4_UASstopsmGDPmycstop_FruFLP male VNC 3
	dpr 18 male VNC 2										present	present	BS_E6	4-7daysDpr18GAL4_UASstopsmGDPmycstop_FruFLP male VNC 4
	dpr 18 male VNC 3										absent	present	BS_E7	4-7daysDpr18GAL4_UASstopsmGDPmycstop_FruFLP male VNC 5
	dpr 18 male VNC 4										absent	absent	BS_O6	4-7daysDpr18GAL4_UASstopsmGDPmycstop_FruFLP male VNC 2
	dpr 18 male VNC 5										present	present	BS_P1	4-7daysDpr18GAL4_UASstopsmGDPmycstop_FruFLP male VNC
	Numerical Scoring Observation										0.4	0.6

## Sheet: Raw Count Data
A key for columns D-L is provided in 'items scored' in Read_Me sheet, with definitions for abbreviations	Abbreviated genotype	Anterior Midbrain (cell body count)	mcAL (cell body count)	Top (cell body count)	T1 (cell body count)	T2 wing (cell body count)	T2 (cell body count)	T3 (cell body count)	Abdominal ganglion (cell body count)	Internal Lab Notation: Blinded Image File name	Internal Lab Notation: Confocal Image File Name
	DIP alpha female brain 1	3	11							K2	4d_female_DIPalpha_55810_fruflp_4_20180920
	DIP alpha female brain 2	8	13							L2	4d_female_DIPalpha_55810_fruflp_1_20180917
	DIP alpha female brain 3	7	12							P9	4d_female_DIPalpha_55810_fruflp_5_20180921
	DIP alpha female brain 4	9	8							Q1	4d_female_DIPalpha_55810_fruflp_2_20180918
	DIP alpha female brain 5	5	11							Q9	4d_female_DIPalpha_55810_fruflp_3_20180919
	DIP alpha female VNC 1			1	0	3	2	1	4	BB6	6d_female_vnc_DIPalpha_55810_fruflp_3_20181106
	DIP alpha female VNC 2			0	1	2	2	2	4	BB8	6d_female_vnc_DIPalpha_55810_fruflp_2_20181106
	DIP alpha female VNC 3			1	0	5	3	3	2	DD6	6d_female_vnc_DIPalpha_55810_fruflp_6_20181106
	DIP alpha female VNC 4			0	0	1	3	6	1	FF9	6d_female_vnc_DIPalpha_55810_fruflp_4_20181106
	DIP alpha female VNC 5			0	0	3	4	2	3	GG7	6d_female_vnc_DIPalpha_55810_fruflp_5_20181106
	DIP alpha male brain 1	0	14							K5	4d_male_DIPalpha_55810_fruflp_4_20180920
	DIP alpha male brain 2	0	15							L7	4d_male_DIPalpha_55810_fruflp_1_20180917
	DIP alpha male brain 3	0	12							M3	4d_male_DIPalpha_55810_fruflp_6_20180921
	DIP alpha male brain 4	0	14							N2	4d_male_DIPalpha_55810_fruflp_3_20180919
	DIP alpha male brain 5	1	11							N5	4d_male_DIPalpha_55810_fruflp_2_20180918
	DIP alpha male VNC 1			0	0	1	4	3	7	CC0	6d_male_vnc_DIPalpha_55810_fruflp_2_20181106
	DIP alpha male VNC 2			0	1	4	0	1	2	CC6	6d_male_vnc_DIPalpha_55810_fruflp_5_20181106
	DIP alpha male VNC 3			0	3	0	1	1	5	EE3	6d_male_vnc_DIPalpha_55810_fruflp_4_20181106
	DIP alpha male VNC 4			0	0	3	0	0	4	FF8	6d_male_vnc_DIPalpha_55810_fruflp_3_20181106
	DIP alpha male VNC 5			0	2	4	2	2	2	GG6	6d_male_vnc_DIPalpha_55810_fruflp_1_20181106
	DIP beta female brain 1	4	1							K7	4-7day_DIPBetagal4_fruFLP_uas_stop_mcd8gfp female5
	DIP beta female brain 2	13	18							P0	4-7day_DIPBetagal4_fruFLP_uas_stop_mcd8gfp female1
	DIP beta female brain 3	3	20							Q2	4-7day_DIPBetagal4_fruFLP_uas_stop_mcd8gfp female2
	DIP beta female brain 4	9	7							R0	4-7day_DIPBetagal4_fruFLP_uas_stop_mcd8gfp female3
	DIP beta female brain 5	9	16							R9	4-7day_DIPBetagal4_fruFLP_uas_stop_mcd8gfp female4
	DIP beta female VNC 1			1	0	13	0	0	16	AA0	4-7day_DIPBetagal4_fruFLP_uas_stop_mcd8gfp female 3
	DIP beta female VNC 2			2	0	10	0	0	6	AA6	4-7day_DIPBetagal4_fruFLP_uas_stop_mcd8gfp female 4
	DIP beta female VNC 3			4	0	13	0	1	9	BB2	4-7day_DIPBetagal4_fruFLP_uas_stop_mcd8gfp female 1
	DIP beta female VNC 4			0	0	7	1	0	7	EE8	4-7day_DIPBetagal4_fruFLP_uas_stop_mcd8gfp female 2
	DIP beta female VNC 5			1	3	14	5	2	13	FF6	4-7day_DIPBetagal4_fruFLP_uas_stop_mcd8gfp female 5
	DIP beta male brain 1	6	10							J1	4-7day_DIPBetagal4_fruFLP_uas_stop_mcd8gfp male5
	DIP beta male brain 2	3	2							M2	4-7day_DIPBetagal4_fruFLP_uas_stop_mcd8gfp male2
	DIP beta male brain 3	3	4							N0	4-7day_DIPBetagal4_fruFLP_uas_stop_mcd8gfp male1
	DIP beta male brain 4	6	10							Q0	4-7day_DIPBetagal4_fruFLP_uas_stop_mcd8gfp male3
	DIP beta male brain 5	14	13							R5	4-7day_DIPBetagal4_fruFLP_uas_stop_mcd8gfp male4
	DIP beta male VNC 1			0	0	4	0	0	8	AA4	4-7day_DIPBetagal4_fruFLP_uas_stop_mcd8gfp male VNC 4
	DIP beta male VNC 2			unscorable	3	6	2	1	18	CC9	4-7day_DIPBetagal4_fruFLP_uas_stop_mcd8gfp male VNC 5
	DIP beta male VNC 3			6	0	23	3	2	17	DD3	4-7day_DIPBetagal4_fruFLP_uas_stop_mcd8gfp male VNC 3
	DIP beta male VNC 4			2	7	7	10	7	unscorable	FF4	4-7day_DIPBetagal4_fruFLP_uas_stop_mcd8gfp male VNC 1
	DIP beta male VNC 5			2	6	7	1	5	2	GG5	4-7day_DIPBetagal4_fruFLP_uas_stop_mcd8gfp male VNC 2
	DIP delta female brain 1	2	0							K9	6d_female_DIPdelta_55810_fruflp_6_20180926
	DIP delta female brain 2	1	0							L9	6d_female_DIPdelta_55810_fruflp_16_20180929
	DIP delta female brain 3	1	0							P3	6d_female_DIPdelta_55810_fruflp_2_20180925
	DIP delta female brain 4	3	0							P6	6d_female_DIPdelta_55810_fruflp_7_20180927
	DIP delta female brain 5	2	0							P7	6d_female_DIPdelta_55810_fruflp_15_20180928
	DIP delta female VNC 1			4	0	4	7	0	4	AA8	6d_female_DIPdelta_VNC_55810_fruflp_3_20190201
	DIP delta female VNC 2			1	1	5	0	1	8	CC5	6d_female_DIPdelta_VNC_55810_fruflp_4_20190201
	DIP delta female VNC 3			0	2	3	11	4	15	EE4	6d_female_DIPdelta_VNC_55810_fruflp_1_20181005
	DIP delta female VNC 4			0	0	2	6	1	6	HH3	6d_female_DIPdelta_VNC_55810_fruflp_2_20181005
	DIP delta female VNC 5			3	0	8	5	3	0	HH5	6d_female_DIPdelta_VNC_55810_fruflp_5_20190201
	DIP delta male brain 1	0	0							J0	6d_male_DIPdelta_55810_fruflp_7_20180929
	DIP delta male brain 2	0	0							L6	6d_male_DIPdelta_55810_fruflp_6_20180928
	DIP delta male brain 3	3	0							M7	6d_male_DIPdelta_55810_fruflp_2_20180925
	DIP delta male brain 4	2	0							M8	6d_male_DIPdelta_55810_fruflp_4_20180927
	DIP delta male brain 5	2	0							P2	6d_male_DIPdelta_55810_fruflp_3_20180926
	DIP delta male VNC 1			0	0	10	12	9	16	DD8	6d_male_DIPdelta_VNC_55810_fruflp_5_20190201
	DIP delta male VNC 2			1	0	4	13	0	7	EE5	6d_male_DIPdelta_VNC_55810_fruflp_2_20181005
	DIP delta male VNC 3			0	0	13	17	4	16	FF2	6d_male_DIPdelta_VNC_55810_fruflp_1_20181005
	DIP delta male VNC 4			2	0	9	18	10	20	HH0	6d_male_DIPdelta_VNC_55810_fruflp_6_20190201
	DIP delta male VNC 5			0	0	9	15	2	13	HH6	6d_male_DIPdelta_VNC_55810_fruflp_4_20190201
	DIP epsilon female brain 1	2	poor image quality							J3	4-7day_DIPEpsilongal4_fruFLP_uas_stop_mcd8gfp female3
	DIP epsilon female brain 2	4	11							K1	4-7day_DIPEpsilongal4_fruFLP_uas_stop_mcd8gfp female1
	DIP epsilon female brain 3	3	16							L4	4-7day_DIPEpsilongal4_fruFLP_uas_stop_mcd8gfp female5
	DIP epsilon female brain 4	2	10							N8	4-7day_DIPEpsilongal4_fruFLP_uas_stop_mcd8gfp female2
	DIP epsilon female brain 5	1	15							R4	4-7day_DIPEpsilongal4_fruFLP_uas_stop_mcd8gfp female4
	DIP epsilon female VNC 1			5	0	12	1	6	8	BB1	4-7day_DIPepsilongal4_fruFLP_uas_stop_mcd8gfp female VNC 5
	DIP epsilon female VNC 2			1	0	4	0	1	unscorable	BB4	4-7day_DIPepsilongal4_fruFLP_uas_stop_mcd8gfp female VNC 2
	DIP epsilon female VNC 3			4	0	17	4	7	12	FF0	4-7day_DIPepsilongal4_fruFLP_uas_stop_mcd8gfp female VNC 4
	DIP epsilon female VNC 4			1	0	14	3	0	11	FF5	4-7day_DIPepsilongal4_fruFLP_uas_stop_mcd8gfp female VNC 3
	DIP epsilon female VNC 5			0	0	9	2	2	3	HH2	4-7day_DIPepsilongal4_fruFLP_uas_stop_mcd8gfp female VNC 1
	DIP epsilon male brain 1	1	11							K3	4-7day_DIPEpsilongal4_fruFLP_uas_stop_mcd8gfp male7
	DIP epsilon male brain 2	2	14							L8	4-7day_DIPEpsilongal4_fruFLP_uas_stop_mcd8gfp male1
	DIP epsilon male brain 3	2	12							M0	4-7day_DIPEpsilongal4_fruFLP_uas_stop_mcd8gfp male6
	DIP epsilon male brain 4	0	10							M6	4-7day_DIPEpsilongal4_fruFLP_uas_stop_mcd8gfp male2
	DIP epsilon male brain 5	1	5							N3	4-7day_DIPEpsilongal4_fruFLP_uas_stop_mcd8gfp male4
	DIP epsilon male VNC 1			0	0	12	0	0	unscorable	AA2	4-7day_DIPepsilongal4_fruFLP_uas_stop_mcd8gfp male VNC 2
	DIP epsilon male VNC 2			0	1	14	11	6	11	AA9	4-7day_DIPepsilongal4_fruFLP_uas_stop_mcd8gfp male VNC 5
	DIP epsilon male VNC 3			0	1	16	1	6	13	BB3	4-7day_DIPepsilongal4_fruFLP_uas_stop_mcd8gfp male VNC 1
	DIP epsilon male VNC 4			1	0	9	1	1	8	BB7	4-7day_DIPepsilongal4_fruFLP_uas_stop_mcd8gfp male VNC 3
	DIP epsilon male VNC 5			0	0	2	2	0	9	DD0	4-7day_DIPepsilongal4_fruFLP_uas_stop_mcd8gfp male VNC 4
	DIP eta female brain 1	3	1							J9	4d_female_DIPeta_55810_fruflp_3_20180918
	DIP eta female brain 2	0	3							K4	4d_female_DIPeta_55810_fruflp_2_20180918
	DIP eta female brain 3	0	0							M4	6d_female_DIPeta_55810_fruflp_5_20180918
	DIP eta female brain 4	7	0							N4	6d_female_DIPeta_55810_fruflp_4_20180918
	DIP eta female brain 5	5	1							P1	4d_female_DIPeta_55810_fruflp_1_20190313
	DIP eta female VNC 1			2	0	8	0	3	2	AA5	6d_female_DIPeta_vnc_55810_fruflp_2_20181005
	DIP eta female VNC 2			6	0	6	0	1	unscorable	DD9	4d_female_DIPeta_vnc_55810_fruflp_4_20181005
	DIP eta female VNC 3			3	4	15	2	3	4	EE6	6d_female_DIPeta_vnc_55810_fruflp_1_20181005
	DIP eta female VNC 4			3	0	6	0	0	1	GG8	4d_female_DIPeta_vnc_55810_fruflp_3_20181005
	DIP eta female VNC 5			5	2	3	2	1	1	HH7	4d_female_DIPeta_vnc_55810_fruflp_5_20181005
	DIP eta male brain 1	21	1	5	2	10	4	1	1	J7	6d_male_DIPeta_55810_fruflp_3_20180918
	DIP eta male brain 2	19	2							K6	6d_male_DIPeta_55810_fruflp_1_20180918
	DIP eta male brain 3	12	0							L1	6d_male_DIPeta_55810_fruflp_5_20180918
	DIP eta male brain 4	18	0							N7	6d_male_DIPeta_55810_fruflp_2_20180918
	DIP eta male brain 5	14	0							Q5	6d_male_DIPeta_55810_fruflp_4_20180918
	DIP eta male VNC 1			5	2	10	4	1	1	AA7	6d_male_VNC_DIPeta_55810_fruflp_2_20180918
	DIP eta male VNC 2			5	2	12	4	3	2	BB9	6d_male_VNC_DIPeta_55810_fruflp_5_20180918
	DIP eta male VNC 3			4	0	20	2	4	3	CC7	6d_male_VNC_DIPeta_55810_fruflp_4_20180918
	DIP eta male VNC 4			6	0	17	9	10	3	DD5	6d_male_VNC_DIPeta_55810_fruflp_3_20181005
	DIP eta male VNC 5			4	2	13	4	6	2	HH9	6d_male_VNC_DIPeta_55810_fruflp_7_20180918
	DIP gamma female brain 1	14	21							J8	6d_female_DIPGamma_55810_fruflp_7_20180925
	DIP gamma female brain 2	8	12							K0	6d_female_DIPGamma_55810_fruflp_3_20180925
	DIP gamma female brain 3	6	16							M5	6d_female_DIPGamma_55810_fruflp_4_20180925
	DIP gamma female brain 4	0	15							N6	6d_female_DIPGamma_55810_fruflp_5_20180925
	DIP gamma female brain 5	5	15							Q3	6d_female_DIPGamma_55810_fruflp_6_20180925
	DIP gamma female VNC 1			0	0	0	8	3	8	CC1	6d__female_DIPgamma_VNC_55810_fruflp_4_20180918
	DIP gamma female VNC 2			3	0	3	3	5	16	CC4	6d__female_DIPgamma_VNC_55810_fruflp_2_20180918
	DIP gamma female VNC 3			5	0	10	6	5	22	EE1	6d__female_DIPgamma_VNC_55810_fruflp_3_20180918
	DIP gamma female VNC 4			8	3	5	6	15	17	FF1	6d__female_DIPgamma_VNC_55810_fruflp_1_20180918
	DIP gamma female VNC 5			9	0	6	0	5	10	GG4	7d__female_DIPgamma_VNC_55810_fruflp_5_20190220
	DIP gamma male brain 1	5	25							J5	6d_male_DIPGamma_55810_fruflp_4_20180918
	DIP gamma male brain 2	15	17							P8	6d_male_DIPGamma_55810_fruflp_5_20180918
	DIP gamma male brain 3	24	20							Q6	6d_male_DIPGamma_55810_fruflp_8_20180918
	DIP gamma male brain 4	32	20							R6	6d_male_DIPGamma_55810_fruflp_2_20180918
	DIP gamma male brain 5	15	16							R8	6d_male_DIPGamma_55810_fruflp_7_20180918
	DIP gamma male VNC 1			6	0	2	5	1	12	AA3	6d__male_DIPgamma_VNC_55810_fruflp_1_20180918
	DIP gamma male VNC 2			0	1	0	5	1	11	BB0	6d__male_DIPgamma_VNC_55810_fruflp_2_20180918
	DIP gamma male VNC 3			4	0	2	7	4	13	CC3	6d__male_DIPgamma_VNC_55810_fruflp_3_20180918
	DIP gamma male VNC 4			9	0	12	3	0	17	DD4	6d__male_DIPgamma_VNC_55810_fruflp_5_20180918
	DIP gamma male VNC 5			0	0	2	7	3	12	HH1	6d__male_DIPgamma_VNC_55810_fruflp_4_20180918
	DIP theta female brain 1	16	14							J2	4-7day_DIPThetagal4_fruFLP_uas_stop_mcd8gfp female3
	DIP theta female brain 2	7	12							L5	4-7day_DIPThetagal4_fruFLP_uas_stop_mcd8gfp female4
	DIP theta female brain 3	16	11							M1	4-7day_DIPThetagal4_fruFLP_uas_stop_mcd8gfp female2
	DIP theta female brain 4	20	12							N9	4-7day_DIPThetagal4_fruFLP_uas_stop_mcd8gfp female1
	DIP theta female brain 5	4	11							P4	4-7day_DIPThetagal4_fruFLP_uas_stop_mcd8gfp female5
	DIP theta female VNC 1			5	2	10	0	0	9	AA1	4-7day_DIPthetagal4_fruFLP_uas_stop_mcd8gfp female VNC 1
	DIP theta female VNC 2			0	0	10	3	8	10	CC2	4-7day_DIPthetagal4_fruFLP_uas_stop_mcd8gfp female VNC 5
	DIP theta female VNC 3			2	0	10	1	3	5	EE2	4-7day_DIPthetagal4_fruFLP_uas_stop_mcd8gfp female VNC 3
	DIP theta female VNC 4			2	3	10	5	0	8	GG0	4-7day_DIPthetagal4_fruFLP_uas_stop_mcd8gfp female VNC 4
	DIP theta female VNC 5			3	0	9	3	4	4	GG9	4-7day_DIPthetagal4_fruFLP_uas_stop_mcd8gfp female VNC 2
	DIP theta male brain 1	0	poor image quality							K8	4-7day_DIPThetagal4_fruFLP_uas_stop_mcd8gfp male4
	DIP theta male brain 2	10	8							L3	4-7day_DIPThetagal4_fruFLP_uas_stop_mcd8gfp male3
	DIP theta male brain 3	7	14							P5	4-7day_DIPThetagal4_fruFLP_uas_stop_mcd8gfp male2
	DIP theta male brain 4	6	11							Q7	4-7day_DIPThetagal4_fruFLP_uas_stop_mcd8gfp male1
	DIP theta male brain 5	10	16							R3	4-7day_DIPThetagal4_fruFLP_uas_stop_mcd8gfp male7
	DIP theta male VNC 1			5	4	14	13	8	18	CC8	4-7day_DIPthetagal4_fruFLP_uas_stop_mcd8gfp male VNC 5
	DIP theta male VNC 2			2	9	4	9	0	9	DD1	4-7day_DIPthetagal4_fruFLP_uas_stop_mcd8gfp male VNC 7
	DIP theta male VNC 3			3	8	4	7	6	13	DD7	4-7day_DIPthetagal4_fruFLP_uas_stop_mcd8gfp male VNC 3
	DIP theta male VNC 4			2	0	13	1	6	21	EE9	4-7day_DIPthetagal4_fruFLP_uas_stop_mcd8gfp male VNC 4
	DIP theta male VNC 5			1	0	16	6	0	20	GG2	4-7day_DIPthetagal4_fruFLP_uas_stop_mcd8gfp male VNC 8
	DIP zeta female brain 1	7	12							L0	4-7day_DIPZetagal4_fruFLP_uas_stop_mcd8gfp female6
	DIP zeta female brain 2	3	4							M9	4-7day_DIPZetagal4_fruFLP_uas_stop_mcd8gfp female1
	DIP zeta female brain 3	3	6							N1	4-7day_DIPZetagal4_fruFLP_uas_stop_mcd8gfp female2
	DIP zeta female brain 4	3	8							Q4	4-7day_DIPZetagal4_fruFLP_uas_stop_mcd8gfp female4
	DIP zeta female brain 5	4	6							R1	4-7day_DIPZetagal4_fruFLP_uas_stop_mcd8gfp female3
	DIP zeta female VNC 1			unscorable	unscorable	unscorable	unscorable	unscorable	unscorable	BB5	DIPzeta_Female_VNC_3
	DIP zeta female VNC 2			1	0	3	0	0	3	DD2	DIPzeta_Female_VNC_2
	DIP zeta female VNC 3			0	0	2	2	0	4	GG3	DIPzeta_Female_VNC_4
	DIP zeta female VNC 4			0	0	10	0	0	9	HH4	DIPzeta_Female_VNC_1
	DIP zeta female VNC 5			0	0	8	3	0	4	HH8	DIPzeta_Female_VNC_5
	DIP zeta male brain 1	4	poor image quality							J4	4-7day_DIPZetagal4_fruFLP_uas_stop_mcd8gfp male2
	DIP zeta male brain 2	1	2							J6	4-7day_DIPZetagal4_fruFLP_uas_stop_mcd8gfp male4
	DIP zeta male brain 3	4	2							Q8	4-7day_DIPZetagal4_fruFLP_uas_stop_mcd8gfp male1
	DIP zeta male brain 4	3	unscorable							R2	4-7day_DIPZetagal4_fruFLP_uas_stop_mcd8gfp male3
	DIP zeta male brain 5	5	5							R7	4-7day_DIPZetagal4_fruFLP_uas_stop_mcd8gfp male5
	DIP zeta male VNC 1			0	0	0	0	0	2	EE0	DIPzeta_male_VNC_1
	DIP zeta male VNC 2			0	8	0	0	0	3	EE7	DIPzeta_male_VNC_4
	DIP zeta male VNC 3			2	0	3	0	0	0	FF3	DIPzeta_male_VNC_2
	DIP zeta male VNC 4			3	0	4	2	5	6	FF7	DIPzeta_male_VNC_5
	DIP zeta male VNC 5			0	0	9	0	0	4	GG1	DIPzeta_male_VNC_3
	dpr 1 female brain 1	26	26							I7	4-7day_dpr1gal4_fruFLP_uas_stop_mcd8gfp female
	dpr 1 female brain 2	17	31							J9	4-7day_dpr1gal4_fruFLP_uas_stop_mcd8gfp female 2
	dpr 1 female brain 3	7	3							F2	4-7day_dpr1gal4_fruFLP_uas_stop_mcd8gfp female 3
	dpr 1 female brain 4	11	26							K8	4-7day_dpr1gal4_fruFLP_uas_stop_mcd8gfp female 4
	dpr 1 female brain 5	18	22							H6	4-7day_dpr1gal4_fruFLP_uas_stop_mcd8gfp female 5
	dpr 1 female VNC 1			5	0	14	9	4	10	K6	4-7day_dpr1gal4_fruFLP_uas_stop_mcd8gfp female VNC
	dpr 1 female VNC 2			3	0	15	6	6	17	J7	4-7day_dpr1gal4_fruFLP_uas_stop_mcd8gfp female VNC 2
	dpr 1 female VNC 3			3	unscorable	13	19	11	20	H9	4-7day_dpr1gal4_fruFLP_uas_stop_mcd8gfp female VNC 3
	dpr 1 female VNC 4			0	1	17	8	14	9	A1	4-7day_dpr1gal4_fruFLP_uas_stop_mcd8gfp female VNC 4
	dpr 1 female VNC 5			5	2	21	9	5	11	O8	4-7day_dpr1gal4_fruFLP_uas_stop_mcd8gfp female VNC 5
	dpr 1 male brain 1	22	34							K1	4-7day_dpr1gal4_fruFLP_uas_stop_mcd8gfp male
	dpr 1 male brain 2	unscorable	unscorable							K7	4-7day_dpr1gal4_fruFLP_uas_stop_mcd8gfp male 2
	dpr 1 male brain 3	image quality too poor to count	image quality too poor to count							D2	4-7day_dpr1gal4_fruFLP_uas_stop_mcd8gfp male 3
	dpr 1 male brain 4	20	37							B1	4-7day_dpr1gal4_fruFLP_uas_stop_mcd8gfp male 4
	dpr 1 male brain 5	27	32							O2	4-7day_dpr1gal4_fruFLP_uas_stop_mcd8gfp male 5
	dpr 1 male VNC 1			4	5	27	8	12	25	L1	4-7day_dpr1gal4_fruFLP_uas_stop_mcd8gfp male VNC
	dpr 1 male VNC 2			9	1	36	15	5	42	H5	4-7day_dpr1gal4_fruFLP_uas_stop_mcd8gfp male VNC 2
	dpr 1 male VNC 3			7	0	14	8	11	18	P3	4-7day_dpr1gal4_fruFLP_uas_stop_mcd8gfp male VNC 3
	dpr 1 male VNC 4			4	2	poor image quality	4	9	poor image quality	M3	4-7day_dpr1gal4_fruFLP_uas_stop_mcd8gfp male VNC 4
	dpr 1 male VNC 5			3	3	19	11	11	29	C2	4-7day_dpr1gal4_fruFLP_uas_stop_mcd8gfp male VNC 5
	dpr 2 female brain 1	19	37							BS_A3	4-7day_dpr2gal4_fruFLP_uas_stop_mcd8gfp female 2
	dpr 2 female brain 2	11	9							BS_D5	4-7day_dpr2gal4_fruFLP_uas_stop_mcd8gfp female 5
	dpr 2 female brain 3	24	23							BS_E1	4-7day_dpr2gal4_fruFLP_uas_stop_mcd8gfp female 4
	dpr 2 female brain 4	22	25							BS_Q4	4-7day_dpr2gal4_fruFLP_uas_stop_mcd8gfp female 3
	dpr 2 female brain 5	18	32							BS_S7	4-7day_dpr2gal4_fruFLP_uas_stop_mcd8gfp female
	dpr 2 female VNC 1			6	7	16	9	9	17	BS_B2	4-7day_dpr2gal4_fruFLP_uas_stop_mcd8gfp female VNC
	dpr 2 female VNC 2			1	4	9	6	4	17	BS_E3	4-7day_dpr2gal4_fruFLP_uas_stop_mcd8gfp female VNC 3
	dpr 2 female VNC 3			7	6	12	12	6	23	BS_E9	4-7day_dpr2gal4_fruFLP_uas_stop_mcd8gfp female VNC 2
	dpr 2 female VNC 4			9	2	14	7	2	15	BS_O5	4-7day_dpr2gal4_fruFLP_uas_stop_mcd8gfp female VNC 5
	dpr 2 female VNC 5			5	1	10	6	4	13	BS_T4	4-7day_dpr2gal4_fruFLP_uas_stop_mcd8gfp female VNC 4
	dpr 2 male brain 1	29	33							BS_A5	4-7day_dpr2gal4_fruFLP_uas_stop_mcd8gfp male 6
	dpr 2 male brain 2	35	45							BS_F1	4-7day_dpr2gal4_fruFLP_uas_stop_mcd8gfp male 2
	dpr 2 male brain 3	27	34							BS_O8	4-7day_dpr2gal4_fruFLP_uas_stop_mcd8gfp male 5
	dpr 2 male brain 4	41	50							BS_P4	4-7day_dpr2gal4_fruFLP_uas_stop_mcd8gfp male 3
	dpr 2 male brain 5	0	45							BS_Q6	4-7day_dpr2gal4_fruFLP_uas_stop_mcd8gfp male
	dpr 2 male VNC 1			13	10	28	29	7	37	BS_B1	4-7day_dpr2gal4_fruFLP_uas_stop_mcd8gfp male VNC
	dpr 2 male VNC 2			3	5	24	24	16	35	BS_C4	4-7day_dpr2gal4_fruFLP_uas_stop_mcd8gfp male VNC 4
	dpr 2 male VNC 3			7	17	26	26	14	30	BS_M5	4-7day_dpr2gal4_fruFLP_uas_stop_mcd8gfp male VNC 3
	dpr 2 male VNC 4			4	12	20	24	2	27	BS_O9	4-7day_dpr2gal4_fruFLP_uas_stop_mcd8gfp male VNC 5
	dpr 2 male VNC 5			6	12	25	19	21	34	BS_R7	4-7day_dpr2gal4_fruFLP_uas_stop_mcd8gfp male VNC 2
	dpr 3 female brain 1	23	21							H2	4-7day_dpr3gal4_fruFLP_uas_stop_mcd8gfp female
	dpr 3 female brain 2	15	20							I8	4-7day_dpr3gal4_fruFLP_uas_stop_mcd8gfp female 2
	dpr 3 female brain 3	poor image quality	poor image quality							L8	4-7day_dpr3gal4_fruFLP_uas_stop_mcd8gfp female 3
	dpr 3 female brain 4	22	19							N3	4-7day_dpr3gal4_fruFLP_uas_stop_mcd8gfp female 4
	dpr 3 female brain 5	22	22							D5	4-7day_dpr3gal4_fruFLP_uas_stop_mcd8gfp female 5
	dpr 3 female VNC 1			6	3	12	9	6	15	L2	4-7day_dpr3gal4_fruFLP_uas_stop_mcd8gfp female VNC
	dpr 3 female VNC 2			6	0	13	5	8	16	M2	4-7day_dpr3gal4_fruFLP_uas_stop_mcd8gfp female VNC 2
	dpr 3 female VNC 3			7	0	17	9	14	15	G6	4-7day_dpr3gal4_fruFLP_uas_stop_mcd8gfp female VNC 3
	dpr 3 female VNC 4			3	6	10	3	7	14	M6	4-7day_dpr3gal4_fruFLP_uas_stop_mcd8gfp female VNC 4
	dpr 3 female VNC 5			15	6	7	4	6	11	F1	4-7day_dpr3gal4_fruFLP_uas_stop_mcd8gfp female VNC 5
	dpr 3 male brain 1	6	13							D9	4-7day_dpr3gal4_fruFLP_uas_stop_mcd8gfp male
	dpr 3 male brain 2	13	21							R1	4-7day_dpr3gal4_fruFLP_uas_stop_mcd8gfp male 2
	dpr 3 male brain 3	unscorable	16							G8	4-7day_dpr3gal4_fruFLP_uas_stop_mcd8gfp male 3
	dpr 3 male brain 4	17	24							E9	4-7day_dpr3gal4_fruFLP_uas_stop_mcd8gfp male 4
	dpr 3 male brain 5	8	14							N7	4-7day_dpr3gal4_fruFLP_uas_stop_mcd8gfp male 5
	dpr 3 male VNC 1			5	0	17	12	unscorable	unscorable	C5	4-7day_dpr3gal4_fruFLP_uas_stop_mcd8gfp male VNC
	dpr 3 male VNC 2			6	1	unscorable	13	9	15	A4	4-7day_dpr3gal4_fruFLP_uas_stop_mcd8gfp male VNC 2
	dpr 3 male VNC 3			13	9	18	19	16	23	I5	4-7day_dpr3gal4_fruFLP_uas_stop_mcd8gfp male VNC 3
	dpr 3 male VNC 4			3	8	17	12	10	unscorable	F4	4-7day_dpr3gal4_fruFLP_uas_stop_mcd8gfp male VNC 4
	dpr 3 male VNC 5			5	4	11	15	7	15	H4	4-7day_dpr3gal4_fruFLP_uas_stop_mcd8gfp male VNC 5
	dpr 4 female brain 1	17	16							BS_M7	4-7daysDpr4GAL4_UASstopsmGDPmycstop_FruFLP female
	dpr 4 female brain 2	8	6							BS_B3	4-7daysDpr4GAL4_UASstopsmGDPmycstop_FruFLP female 5
	dpr 4 female brain 3	8	23							BS_B7	4-7daysDpr4GAL4_UASstopsmGDPmycstop_FruFLP female 2
	dpr 4 female brain 4	13	17							BS_C5	4-7daysDpr4GAL4_UASstopsmGDPmycstop_FruFLP female 4
	dpr 4 female brain 5	13	19							BS_H5	4-7daysDpr4GAL4_UASstopsmGDPmycstop_FruFLP female 3
	dpr 4 female VNC 1			5	5	20	11	13	16	BS_J4	4-7daysDpr4GAL4_UASstopsmGDPmycstop_FruFLP female VNC 4
	dpr 4 female VNC 2			0	1	8	4	11	14	BS_J5	4-7daysDpr4GAL4_UASstopsmGDPmycstop_FruFLP female VNC 7
	dpr 4 female VNC 3			2	2	15	7	5	13	BS_O4	4-7daysDpr4GAL4_UASstopsmGDPmycstop_FruFLP female VNC 5
	dpr 4 female VNC 4			6	7	13	16	9	17	BS_Q7	4-7daysDpr4GAL4_UASstopsmGDPmycstop_FruFLP female VNC 3
	dpr 4 female VNC 5			5	7	9	5	11	10	BS_T2	4-7daysDpr4GAL4_UASstopsmGDPmycstop_FruFLP female VNC 6
	dpr 4 male brain 1	15	9							BS_C2	4-7daysDpr4GAL4_UASstopsmGDPmycstop_FruFLP male 6
	dpr 4 male brain 2	10	16							BS_F7	4-7daysDpr4GAL4_UASstopsmGDPmycstop_FruFLP male
	dpr 4 male brain 3	19	19							BS_M9	4-7daysDpr4GAL4_UASstopsmGDPmycstop_FruFLP male 3
	dpr 4 male brain 4	11	22							BS_N7	4-7daysDpr4GAL4_UASstopsmGDPmycstop_FruFLP male 4
	dpr 4 male brain 5	7	29							BS_R4	4-7daysDpr4GAL4_UASstopsmGDPmycstop_FruFLP male 5
	dpr 4 male VNC 1			10	5	20	2	13	18	BS_B8	4-7daysDpr4GAL4_UASstopsmGDPmycstop_FruFLP male VNC 4
	dpr 4 male VNC 2			5	12	25	16	12	21	BS_C7	4-7daysDpr4GAL4_UASstopsmGDPmycstop_FruFLP male VNC 6
	dpr 4 male VNC 3			6	20	20	13	11	19	BS_G8	4-7daysDpr4GAL4_UASstopsmGDPmycstop_FruFLP male VNC 5
	dpr 4 male VNC 4			11	15	16	7	19	26	BS_J6	4-7daysDpr4GAL4_UASstopsmGDPmycstop_FruFLP male VNC 3
	dpr 4 male VNC 5			1	3	17	13	6	16	BS_P5	4-7daysDpr4GAL4_UASstopsmGDPmycstop_FruFLP male VNC
	dpr 5 female brain 1	24	17							BS_E4	6d_female_dpr5_55810_fruflp_3_20180919
	dpr 5 female brain 2	17	20							BS_H7	6d_female_dpr5_55810_fruflp_6_20180919
	dpr 5 female brain 3	21	28							BS_K3	6d_female_dpr5_55810_fruflp_4_20180919
	dpr 5 female brain 4	12	18							BS_Q8	6d_female_dpr5_55810_fruflp_5_20180919
	dpr 5 female brain 5	11	5							BS_R8	6d_female_dpr5_55810_fruflp_7.1_20180919
	dpr 5 female VNC 1			7	0	19	5	8	16	BS_F8	6d_female_dpr5_VNC_55810_fruflp_5_20181002
	dpr 5 female VNC 2			6	10	9	10	4	13	BS_K4	6d_female_dpr5_VNC_55810_fruflp_2_20181002
	dpr 5 female VNC 3			2	5	21	14	14	27	BS_O3	6d_female_dpr5_VNC_55810_fruflp_7_20181002
	dpr 5 female VNC 4			5	2	16	5	7	18	BS_P3	6d_female_dpr5_VNC_55810_fruflp_6_20181002
	dpr 5 female VNC 5			8	10	25	9	11	24	BS_S2	6d_female_dpr5_VNC_55810_fruflp_4_20181002
	dpr 5 male brain 1	23	21							BS_C9	6d_male_dpr5_55810_fruflp_5_20180919
	dpr 5 male brain 2	11	30							BS_E5	6d_male_dpr5_55810_fruflp_4_20180919
	dpr 5 male brain 3	8	9							BS_J2	6d_male_dpr5_55810_fruflp_1_20180919
	dpr 5 male brain 4	23	30							BS_J8	6d_male_dpr5_55810_fruflp_2_20180919
	dpr 5 male brain 5	20	18							BS_N4	6d_male_dpr5_55810_fruflp_3_20180919
	dpr 5 male VNC 1			7	19	17	28	6	38	BS_A6	7d_male_dpr5_VNC_55810_fruflp_5_20190218
	dpr 5 male VNC 2			4	18	27	23	6	34	BS_F4	7d_male_dpr5_VNC_55810_fruflp_4_20190218
	dpr 5 male VNC 3			0	16	30	33	7	29	BS_J3	6d_male_dpr5_VNC_55810_fruflp_2_20181002
	dpr 5 male VNC 4			8	5	21	24	31	21	BS_Q3	6d_male_dpr5_VNC_55810_fruflp_1_20181002
	dpr 5 male VNC 5			4	18	31	23	15	45	BS_Q5	6d_male_dpr5_VNC_55810_fruflp_3_20181002
	dpr 6 female brain 1	18	11							BS_D2	4-7day_dpr6gal4_fruFLP_uas_stop_mcd8gfp female 4
	dpr 6 female brain 2	20	14							BS_E2	4-7day_dpr6gal4_fruFLP_uas_stop_mcd8gfp female 3
	dpr 6 female brain 3	4	4							BS_H8	4-7day_dpr6gal4_fruFLP_uas_stop_mcd8gfp female 5
	dpr 6 female brain 4	15	13							BS_N9	4-7day_dpr6gal4_fruFLP_uas_stop_mcd8gfp female
	dpr 6 female brain 5	7	14							BS_T3	4-7day_dpr6gal4_fruFLP_uas_stop_mcd8gfp female 2
	dpr 6 female VNC 1			10	18	8	6	7	13	BS_D3	4-7day_dpr6gal4_fruFLP_uas_stop_mcd8gfp female VNC 3
	dpr 6 female VNC 2			5	8	12	9	4	15	BS_D8	4-7day_dpr6gal4_fruFLP_uas_stop_mcd8gfp female VNC 7
	dpr 6 female VNC 3			7	13	13	8	6	24	BS_G1	4-7day_dpr6gal4_fruFLP_uas_stop_mcd8gfp female VNC
	dpr 6 female VNC 4			4	4	20	11	0	4	BS_G4	4-7day_dpr6gal4_fruFLP_uas_stop_mcd8gfp female VNC 4
	dpr 6 female VNC 5			2	5	15	9	7	15	BS_G9	4-7day_dpr6gal4_fruFLP_uas_stop_mcd8gfp female VNC 6
	dpr 6 male brain 1	27	27							BS_F5	4-7day_dpr6gal4_fruFLP_uas_stop_mcd8gfp male 5
	dpr 6 male brain 2	39	18							BS_F9	4-7day_dpr6gal4_fruFLP_uas_stop_mcd8gfp male 3
	dpr 6 male brain 3	32	27							BS_R3	4-7day_dpr6gal4_fruFLP_uas_stop_mcd8gfp male 4
	dpr 6 male brain 4	34	22							BS_R6	4-7day_dpr6gal4_fruFLP_uas_stop_mcd8gfp male 7
	dpr 6 male brain 5	32	25							BS_S4	4-7day_dpr6gal4_fruFLP_uas_stop_mcd8gfp male 2
	dpr 6 male VNC 1			10	6	19	11	11	23	BS_A7	4-7day_dpr6gal4_fruFLP_uas_stop_mcd8gfp male VNC 4
	dpr 6 male VNC 2			6	11	26	16	8	33	BS_F6	4-7day_dpr6gal4_fruFLP_uas_stop_mcd8gfp male VNC 3
	dpr 6 male VNC 3			4	17	2	15	5	19	BS_K2	4-7day_dpr6gal4_fruFLP_uas_stop_mcd8gfp male VNC
	dpr 6 male VNC 4			3	6	7	24	9	21	BS_O1	4-7day_dpr6gal4_fruFLP_uas_stop_mcd8gfp male VNC 5
	dpr 6 male VNC 5			7	13	19	21	10	27	BS_P8	4-7day_dpr6gal4_fruFLP_uas_stop_mcd8gfp male VNC 2
	dpr 8 female brain 1	21	33							K9	4-7day_dpr8gal4_fruFLP_uas_stop_mcd8gfp female
	dpr 8 female brain 2	22	32							P2	4-7day_dpr8gal4_fruFLP_uas_stop_mcd8gfp female 2
	dpr 8 female brain 3	14	13							Q9	4-7day_dpr8gal4_fruFLP_uas_stop_mcd8gfp female 3
	dpr 8 female brain 4	9	14							B2	4-7day_dpr8gal4_fruFLP_uas_stop_mcd8gfp female 4
	dpr 8 female brain 5	10	19							B4	4-7day_dpr8gal4_fruFLP_uas_stop_mcd8gfp female 5
	dpr 8 female VNC 1			5	7	30	11	4	unscorable	M5	4-7day_dpr8gal4_fruFLP_uas_stop_mcd8gfp female VNC
	dpr 8 female VNC 2			5	6	26	4	10	16	O7	4-7day_dpr8gal4_fruFLP_uas_stop_mcd8gfp female VNC 2
	dpr 8 female VNC 3			6	1	20	11	10	17	D1	4-7day_dpr8gal4_fruFLP_uas_stop_mcd8gfp female VNC 3
	dpr 8 female VNC 4			0	5	22	9	14	14	G3	4-7day_dpr8gal4_fruFLP_uas_stop_mcd8gfp female VNC 4
	dpr 8 female VNC 5			9	3	24	5	17	16	C4	4-7day_dpr8gal4_fruFLP_uas_stop_mcd8gfp female VNC 5
	dpr 8 male brain 1	6	17							B3	4-7day_dpr8gal4_fruFLP_uas_stop_mcd8gfp male
	dpr 8 male brain 2	21	16							D7	4-7day_dpr8gal4_fruFLP_uas_stop_mcd8gfp male 2
	dpr 8 male brain 3	12	19							M8	4-7day_dpr8gal4_fruFLP_uas_stop_mcd8gfp male 3
	dpr 8 male brain 4	9	14							D6	4-7day_dpr8gal4_fruFLP_uas_stop_mcd8gfp male 4
	dpr 8 male brain 5	16	18							H8	4-7day_dpr8gal4_fruFLP_uas_stop_mcd8gfp male 5
	dpr 8 male VNC 1			3	4	34	19	16	20	G4	4-7day_dpr8gal4_fruFLP_uas_stop_mcd8gfp male VNC
	dpr 8 male VNC 2			0	8	21	10	12	19	A7	4-7day_dpr8gal4_fruFLP_uas_stop_mcd8gfp male VNC 2
	dpr 8 male VNC 3			3	7	16	22	12	26	P1	4-7day_dpr8gal4_fruFLP_uas_stop_mcd8gfp male VNC 3
	dpr 8 male VNC 4			5	5	29	4	5	17	A5	4-7day_dpr8gal4_fruFLP_uas_stop_mcd8gfp male VNC 4
	dpr 8 male VNC 5			0	10	27	20	10	30	N9	4-7day_dpr8gal4_fruFLP_uas_stop_mcd8gfp male VNC 5
	dpr 9 female brain 1	29	34							BS_A8	4-7day_dpr9gal4_fruFLP_uas_stop_mcd8gfp female 3
	dpr 9 female brain 2	25	36							BS_F3	4-7day_dpr9gal4_fruFLP_uas_stop_mcd8gfp female 5
	dpr 9 female brain 3	29	31							BS_K6	4-7day_dpr9gal4_fruFLP_uas_stop_mcd8gfp female 4
	dpr 9 female brain 4	21	43							BS_R1	4-7day_dpr9gal4_fruFLP_uas_stop_mcd8gfp female 2
	dpr 9 female brain 5	26	27							BS_B5	4-7day_dpr9gal4_fruFLP_uas_stop_mcd8gfp female
	dpr 9 female VNC 1			7	5	22	6	6	22	BS_C6	4-7day_dpr9gal4_fruFLP_uas_stop_mcd8gfp female VNC 3
	dpr 9 female VNC 2			9	5	16	13	2	21	BS_H1	4-7day_dpr9gal4_fruFLP_uas_stop_mcd8gfp female VNC
	dpr 9 female VNC 3			8	8	16	4	7	14	BS_N5	4-7day_dpr9gal4_fruFLP_uas_stop_mcd8gfp female VNC 2
	dpr 9 female VNC 4			5	7	15	6	8	21	BS_R2	4-7day_dpr9gal4_fruFLP_uas_stop_mcd8gfp female VNC 5
	dpr 9 female VNC 5			6	7	25	16	16	18	BS_R9	4-7day_dpr9gal4_fruFLP_uas_stop_mcd8gfp female VNC 4
	dpr 9 male brain 1	17	12							BS_B4	4-7day_dpr9gal4_fruFLP_uas_stop_mcd8gfp male 3
	dpr 9 male brain 2	22	9							BS_D6	4-7day_dpr9gal4_fruFLP_uas_stop_mcd8gfp male 2
	dpr 9 male brain 3	42	43							BS_G6	4-7day_dpr9gal4_fruFLP_uas_stop_mcd8gfp male 4
	dpr 9 male brain 4	26	39							BS_S5	4-7day_dpr9gal4_fruFLP_uas_stop_mcd8gfp male 7
	dpr 9 male brain 5	31	23							BS_S6	4-7day_dpr9gal4_fruFLP_uas_stop_mcd8gfp male 8
	dpr 9 male VNC 1			6	11	18	4	10	29	BS_G5	4-7day_dpr9gal4_fruFLP_uas_stop_mcd8gfp male VNC 4
	dpr 9 male VNC 2			3	6	9	4	8	26	BS_J7	4-7day_dpr9gal4_fruFLP_uas_stop_mcd8gfp male VNC
	dpr 9 male VNC 3			4	9	21	10	6	24	BS_M6	4-7day_dpr9gal4_fruFLP_uas_stop_mcd8gfp male VNC 5
	dpr 9 male VNC 4			4	4	10	6	8	23	BS_P7	4-7day_dpr9gal4_fruFLP_uas_stop_mcd8gfp male VNC 2
	dpr 9 male VNC 5			13	10	33	20	18	36	BS_Q9	4-7day_dpr9gal4_fruFLP_uas_stop_mcd8gfp male VNC 3
	dpr 10 female brain 1	13	14							L4	4d_female_dpr10_55810_fruflp_1_20180917
	dpr 10 female brain 2	11	10							E4	4d_female_dpr10_55810_fruflp_2_20180917
	dpr 10 female brain 3	2	14							Q2	4d_female_dpr10_55810_fruflp_3_20180917
	dpr 10 female brain 4	unscorable	9							M1	4d_female_dpr10_55810_fruflp_4_20180917
	dpr 10 female brain 5	2	10							Q5	6d_female_dpr10_55810_fruflp_5_20180918
	dpr 10 female VNC 1			6	6	21	4	9	22	P5	6d_female_dpr10_VNC_55810_fruflp_1_20181005
	dpr 10 female VNC 2			4	15	19	5	unscorable	unscorable	N6	6d_female_dpr10_VNC_55810_fruflp_2_20181005
	dpr 10 female VNC 3			3	7	13	13	16	22	M4	6d_female_dpr10_VNC_55810_fruflp_3_20181005
	dpr 10 female VNC 4			4	2	19	11	14	18	J5	7d_female_dpr10_VNC_55810_fruflp_5_20190220
	dpr 10 female VNC 5			5	2	14	12	7	25	E8	7d_female_dpr10_VNC_55810_fruflp_6_20190220
	dpr 10 male brain 1	10	12							B8	4d_male_dpr10_55810_fruflp_1_20180917
	dpr 10 male brain 2	8	10							H7	4d_male_dpr10_55810_fruflp_2_20180917
	dpr 10 male brain 3	25	8							I2	7d_male_dpr10_55810_fruflp_4_20190217
	dpr 10 male brain 4	15	10							B9	7d_male_dpr10_55810_fruflp_5_20190217
	dpr 10 male brain 5	20	8							F3	7d_male_dpr10_55810_fruflp_6_20190217
	dpr 10 male VNC 1			7	5	17	21	20	29	J1	6d_male_dpr10_VNC_55810_fruflp_1_20181023
	dpr 10 male VNC 2			6	2	11	25	11	32	F9	6d_male_dpr10_VNC_55810_fruflp_2_20181023
	dpr 10 male VNC 3			6	0	11	14	unscorable	unscorable	D3	7d_male_dpr10_VNC_55810_fruflp_3_20190220
	dpr 10 male VNC 4			6	11	15	27	11	26	H1	7d_male_dpr10_VNC_55810_fruflp_5_20190220
	dpr 10 male VNC 5			5	2	23	17	6	17	Q8	7d_male_dpr10_VNC_55810_fruflp_6_20190220
	dpr 11 female brain 1	unscorable	unscorable							O4	4-7day_dpr11gal4_fruFLP_uas_stop_mcd8gfp female
	dpr 11 female brain 2	poor image quality	poor image quality							C8	4-7day_dpr11gal4_fruFLP_uas_stop_mcd8gfp female 2
	dpr 11 female brain 3	32	27							H3	4-7day_dpr11gal4_fruFLP_uas_stop_mcd8gfp female 3
	dpr 11 female brain 4	32	15							N5	4-7day_dpr11gal4_fruFLP_uas_stop_mcd8gfp female 4
	dpr 11 female brain 5	23	16							R3	4-7day_dpr11gal4_fruFLP_uas_stop_mcd8gfp female 5
	dpr 11 female VNC 1			5	1	24	8	11	13	Q3	4-7day_dpr11gal4_fruFLP_uas_stop_mcd8gfp female VNC
	dpr 11 female VNC 2			5	2	6	8	6	8	Q6	4-7day_dpr11gal4_fruFLP_uas_stop_mcd8gfp female VNC 2
	dpr 11 female VNC 3			7	3	15	11	6	15	O6	4-7day_dpr11gal4_fruFLP_uas_stop_mcd8gfp female VNC 3
	dpr 11 female VNC 4			8	5	23	14	13	15	L9	4-7day_dpr11gal4_fruFLP_uas_stop_mcd8gfp female VNC 4
	dpr 11 female VNC 5			1	0	16	9	7	17	Q4	4-7day_dpr11gal4_fruFLP_uas_stop_mcd8gfp female VNC 5
	dpr 11 male brain 1	32	22							E1	4-7day_dpr11gal4_fruFLP_uas_stop_mcd8gfp male
	dpr 11 male brain 2	37	29							N2	4-7day_dpr11gal4_fruFLP_uas_stop_mcd8gfp male 2
	dpr 11 male brain 3	34	35							P8	4-7day_dpr11gal4_fruFLP_uas_stop_mcd8gfp male 3
	dpr 11 male brain 4	poor image quality	poor image quality							F6	4-7day_dpr11gal4_fruFLP_uas_stop_mcd8gfp male 4
	dpr 11 male brain 5	35	22							G5	4-7day_dpr11gal4_fruFLP_uas_stop_mcd8gfp male 5
	dpr 11 male VNC 1			8	5	47	26	11	29	I9	4-7day_dpr11gal4_fruFLP_uas_stop_mcd8gfp male VNC
	dpr 11 male VNC 2			9	2	25	14	23	13	K2	4-7day_dpr11gal4_fruFLP_uas_stop_mcd8gfp male VNC 2
	dpr 11 male VNC 3			4	10	28	16	21	28	Q7	4-7day_dpr11gal4_fruFLP_uas_stop_mcd8gfp male VNC 3
	dpr 11 male VNC 4			unscorable	unscorable	34	15	22	25	J3	4-7day_dpr11gal4_fruFLP_uas_stop_mcd8gfp male VNC 4
	dpr 11 male VNC 5			3	2	19	1	5	19	E2	4-7day_dpr11gal4_fruFLP_uas_stop_mcd8gfp male VNC 5
	dpr 12 female brain 1	23	34							BS_B9	4-7day_dpr12gal4_fruFLP_uas_stop_mcd8gfp female 5
	dpr 12 female brain 2	20	25							BS_E8	4-7day_dpr12gal4_fruFLP_uas_stop_mcd8gfp female 4
	dpr 12 female brain 3	21	31							BS_S3	4-7day_dpr12gal4_fruFLP_uas_stop_mcd8gfp female
	dpr 12 female brain 4	14	27							BS_T5	4-7day_dpr12gal4_fruFLP_uas_stop_mcd8gfp female 2
	dpr 12 female brain 5	23	22							BS_T7	4-7day_dpr12gal4_fruFLP_uas_stop_mcd8gfp female 3
	dpr 12 female VNC 1			0	2	28	20	7	28	BS_B6	4-7day_dpr12gal4_fruFLP_uas_stop_mcd8gfp female VNC 3
	dpr 12 female VNC 2			9	5	16	11	7	19	BS_C3	4-7day_dpr12gal4_fruFLP_uas_stop_mcd8gfp female VNC
	dpr 12 female VNC 3			14	16	20	13	6	29	BS_D7	4-7day_dpr12gal4_fruFLP_uas_stop_mcd8gfp female VNC 2
	dpr 12 female VNC 4			4	4	16	7	6	9	BS_N3	4-7day_dpr12gal4_fruFLP_uas_stop_mcd8gfp female VNC 5
	dpr 12 female VNC 5			9	11	18	11	11	27	BS_N6	4-7day_dpr12gal4_fruFLP_uas_stop_mcd8gfp female VNC 4
	dpr 12 male brain 1	21	27							BS_H2	4-7day_dpr12gal4_fruFLP_uas_stop_mcd8gfp male 5
	dpr 12 male brain 2	50	39							BS_P6	4-7day_dpr12gal4_fruFLP_uas_stop_mcd8gfp male v2
	dpr 12 male brain 3	39	27							BS_R5	4-7day_dpr12gal4_fruFLP_uas_stop_mcd8gfp male 3
	dpr 12 male brain 4	26	32							BS_S9	4-7day_dpr12gal4_fruFLP_uas_stop_mcd8gfp male 4
	dpr 12 male brain 5	36	35							BS_G3	4-7day_dpr12gal4_fruFLP_uas_stop_mcd8gfp male
	dpr 12 male VNC 1			9	12	12	15	16	29	BS_H3	4-7day_dpr12gal4_fruFLP_uas_stop_mcd8gfp male VNC 6
	dpr 12 male VNC 2			12	24	19	29	14	55	BS_H4	4-7day_dpr12gal4_fruFLP_uas_stop_mcd8gfp male VNC 5
	dpr 12 male VNC 3			7	13	26	28	17	35	BS_K5	4-7day_dpr12gal4_fruFLP_uas_stop_mcd8gfp male VNC 4
	dpr 12 male VNC 4			0	7	12	11	17	24	BS_M4	4-7day_dpr12gal4_fruFLP_uas_stop_mcd8gfp male VNC 3
	dpr 12 male VNC 5			12	34	30	35	25	46	BS_N1	4-7day_dpr12gal4_fruFLP_uas_stop_mcd8gfp male VNC
	dpr 14 female brain 1	4	unscorable							C7	4-7daysDpr14GAL4_UASstopsmGDPmycstop_FruFLP female
	dpr 14 female brain 2	3	15							C9	4-7daysDpr14GAL4_UASstopsmGDPmycstop_FruFLP female 3
	dpr 14 female brain 3	1	5							L5	4-7daysDpr14GAL4_UASstopsmGDPmycstop_FruFLP female 4
	dpr 14 female brain 4	1	4							I6	4-7daysDpr14GAL4_UASstopsmGDPmycstop_FruFLP female 5
	dpr 14 female brain 5	1	7							O5	4-7daysDpr14GAL4_UASstopsmGDPmycstop_FruFLP female 6
	dpr 14 female VNC 1			0	7	9	1	3	unscorable	I3	4-7daysDpr14GAL4_UASstopsmGDPmycstop_FruFLP female VNC
	dpr 14 female VNC 2			4	3	7	4	2	5	R4	4-7daysDpr14GAL4_UASstopsmGDPmycstop_FruFLP female VNC 2
	dpr 14 female VNC 3			3	4	14	6	6	6	G7	4-7daysDpr14GAL4_UASstopsmGDPmycstop_FruFLP female VNC 3
	dpr 14 female VNC 4			4	3	9	7	5	11	I1	4-7daysDpr14GAL4_UASstopsmGDPmycstop_FruFLP female VNC 4
	dpr 14 female VNC 5			4	0	10	4	6	3	F5	4-7daysDpr14GAL4_UASstopsmGDPmycstop_FruFLP female VNC 5
	dpr 14 male brain 1	13	18							C3	4-7daysDpr14GAL4_UASstopsmGDPmycstop_FruFLP male 3
	dpr 14 male brain 2	5	19							G1	4-7daysDpr14GAL4_UASstopsmGDPmycstop_FruFLP male 4
	dpr 14 male brain 3	11	17							M7	4-7daysDpr14GAL4_UASstopsmGDPmycstop_FruFLP male 5
	dpr 14 male brain 4	5	4							C6	4-7daysDpr14GAL4_UASstopsmGDPmycstop_FruFLP male 6
	dpr 14 male brain 5	3	3							E5	4-7daysDpr14GAL4_UASstopsmGDPmycstop_FruFLP male 7
	dpr 14 male VNC 1			1	3	21	4	1	6	A8	4-7daysDpr14GAL4_UASstopsmGDPmycstop_FruFLP male VNC
	dpr 14 male VNC 2			1	4	15	12	1	11	P6	4-7daysDpr14GAL4_UASstopsmGDPmycstop_FruFLP male VNC 2
	dpr 14 male VNC 3			5	0	26	11	10	14	J4	4-7daysDpr14GAL4_UASstopsmGDPmycstop_FruFLP male VNC 3
	dpr 14 male VNC 4			1	4	19	11	5	19	F7	4-7daysDpr14GAL4_UASstopsmGDPmycstop_FruFLP male VNC 4
	dpr 14 male VNC 5			3	1	13	0	12	16	E3	4-7daysDpr14GAL4_UASstopsmGDPmycstop_FruFLP male VNC 5
	dpr 15 female brain 1	poor image quality	poor image quality							O3	4-7day_dpr15gal4_fruFLP_uas_stop_mcd8gfp female
	dpr 15 female brain 2	unscorable	4							C1	4-7day_dpr15gal4_fruFLP_uas_stop_mcd8gfp female 2
	dpr 15 female brain 3	9	15							K5	4-7day_dpr15gal4_fruFLP_uas_stop_mcd8gfp female 3
	dpr 15 female brain 4	3	5							B5	4-7day_dpr15gal4_fruFLP_uas_stop_mcd8gfp female 4
	dpr 15 female brain 5	11	14							N1	4-7day_dpr15gal4_fruFLP_uas_stop_mcd8gfp female 5
	dpr 15 female VNC 1			7	8	26	5	9	17	E6	4-7day_dpr15gal4_fruFLP_uas_stop_mcd8gfp female VNC
	dpr 15 female VNC 2			3	7	15	2	11	12	A3	4-7day_dpr15gal4_fruFLP_uas_stop_mcd8gfp female VNC 2
	dpr 15 female VNC 3			2	5	17	13	7	13	A9	4-7day_dpr15gal4_fruFLP_uas_stop_mcd8gfp female VNC 3
	dpr 15 female VNC 4			3	2	21	7	9	23	A6	4-7day_dpr15gal4_fruFLP_uas_stop_mcd8gfp female VNC 4
	dpr 15 female VNC 5			6	3	16	11	8	21	F8	4-7day_dpr15gal4_fruFLP_uas_stop_mcd8gfp female VNC 5
	dpr 15 male brain 1	27	20							I4	4-7day_dpr15gal4_fruFLP_uas_stop_mcd8gfp male
	dpr 15 male brain 2	16	11							G9	4-7day_dpr15gal4_fruFLP_uas_stop_mcd8gfp male 2
	dpr 15 male brain 3	18	19							R5	4-7day_dpr15gal4_fruFLP_uas_stop_mcd8gfp male 4
	dpr 15 male brain 4	26	19							O1	4-7day_dpr15gal4_fruFLP_uas_stop_mcd8gfp male 5
	dpr 15 male brain 5	14	18							B7	4-7day_dpr15gal4_fruFLP_uas_stop_mcd8gfp male 6
	dpr 15 male VNC 1			2	5	11	5	7	poor image quality	N4	4-7day_dpr15gal4_fruFLP_uas_stop_mcd8gfp male VNC
	dpr 15 male VNC 2			2	2	26	13	24	22	J2	4-7day_dpr15gal4_fruFLP_uas_stop_mcd8gfp male VNC 2
	dpr 15 male VNC 3			2	15	29	11	16	31	P4	4-7day_dpr15gal4_fruFLP_uas_stop_mcd8gfp male VNC 3
	dpr 15 male VNC 4			1	16	22	9	16	25	J8	4-7day_dpr15gal4_fruFLP_uas_stop_mcd8gfp male VNC 4
	dpr 15 male VNC 5			0	0	29	21	6	23	O9	4-7day_dpr15gal4_fruFLP_uas_stop_mcd8gfp male VNC 5
	dpr 16 female brain 1	28	29							BS_D4	4-7day_dpr16gal4_fruFLP_uas_stop_mcd8gfp female 3
	dpr 16 female brain 2	18	28							BS_K1	4-7day_dpr16gal4_fruFLP_uas_stop_mcd8gfp female 2
	dpr 16 female brain 3	13	20							BS_N8	4-7day_dpr16gal4_fruFLP_uas_stop_mcd8gfp female 6
	dpr 16 female brain 4	13	30							BS_J1	4-7day_dpr16gal4_fruFLP_uas_stop_mcd8gfp female 4 v2
	dpr 16 female brain 5	24	40							BS_F2	4-7day_dpr16gal4_fruFLP_uas_stop_mcd8gfp female
	dpr 16 female VNC 1			6	2	17	9	8	22	BS_A2	4-7day_dpr16gal4_fruFLP_uas_stop_mcd8gfp female VNC 4
	dpr 16 female VNC 2			0	9	15	8	6	22	BS_G2	4-7day_dpr16gal4_fruFLP_uas_stop_mcd8gfp female VNC 5
	dpr 16 female VNC 3			7	11	18	5	10	16	BS_H6	4-7day_dpr16gal4_fruFLP_uas_stop_mcd8gfp female VNC 2
	dpr 16 female VNC 4			6	5	15	13	6	15	BS_M3	4-7day_dpr16gal4_fruFLP_uas_stop_mcd8gfp female VNC 3
	dpr 16 female VNC 5			5	3	5	2	6	21	BS_T6	4-7day_dpr16gal4_fruFLP_uas_stop_mcd8gfp female VNC
	dpr 16 male brain 1	21	30							BS_A9	4-7day_dpr16gal4_fruFLP_uas_stop_mcd8gfp male 2
	dpr 16 male brain 2	2	0							BS_K9	4-7day_dpr16gal4_fruFLP_uas_stop_mcd8gfp male 5
	dpr 16 male brain 3	26	5							BS_M8	4-7day_dpr16gal4_fruFLP_uas_stop_mcd8gfp male 3
	dpr 16 male brain 4	38	15							BS_N2	4-7day_dpr16gal4_fruFLP_uas_stop_mcd8gfp male
	dpr 16 male brain 5	13	26							BS_T1	4-7day_dpr16gal4_fruFLP_uas_stop_mcd8gfp male 4
	dpr 16 male VNC 1			9	24	23	17	7	31	BS_D1	4-7day_dpr16gal4_fruFLP_uas_stop_mcd8gfp male VNC 4
	dpr 16 male VNC 2			7	16	15	11	11	17	BS_H9	4-7day_dpr16gal4_fruFLP_uas_stop_mcd8gfp male VNC 2
	dpr 16 male VNC 3			9	14	18	19	10	24	BS_K8	4-7day_dpr16gal4_fruFLP_uas_stop_mcd8gfp male VNC 3
	dpr 16 male VNC 4			0	12	20	18	13	33	BS_P2	4-7day_dpr16gal4_fruFLP_uas_stop_mcd8gfp male VNC 5
	dpr 16 male VNC 5			11	17	17	24	7	31	BS_S1	4-7day_dpr16gal4_fruFLP_uas_stop_mcd8gfp male VNC
	dpr 17 female brain 1	18	30							K3	4-7day_dpr17gal4_fruFLP_uas_stop_mcd8gfp female 2
	dpr 17 female brain 2	5	24							M9	4-7day_dpr17gal4_fruFLP_uas_stop_mcd8gfp female 3
	dpr 17 female brain 3	10	23							P9	4-7day_dpr17gal4_fruFLP_uas_stop_mcd8gfp female 4
	dpr 17 female brain 4	10	25							G2	4-7day_dpr17gal4_fruFLP_uas_stop_mcd8gfp female 5
	dpr 17 female brain 5	unscorable	17							B6	4-7day_dpr17gal4_fruFLP_uas_stop_mcd8gfp female 6
	dpr 17 female VNC 1			3	4	18	9	4	12	A2	4-7day_dpr17gal4_fruFLP_uas_stop_mcd8gfp female VNC
	dpr 17 female VNC 2			5	5	12	6	10	11	L7	4-7day_dpr17gal4_fruFLP_uas_stop_mcd8gfp female VNC 2
	dpr 17 female VNC 3			6	2	19	7	7	11	Q1	4-7day_dpr17gal4_fruFLP_uas_stop_mcd8gfp female VNC 3
	dpr 17 female VNC 4			4	5	20	9	14	14	L3	4-7day_dpr17gal4_fruFLP_uas_stop_mcd8gfp female VNC 4
	dpr 17 female VNC 5			7	10	33	16	14	14	P7	4-7day_dpr17gal4_fruFLP_uas_stop_mcd8gfp female VNC 5
	dpr 17 male brain 1	poor image quality	7							J6	4-7day_dpr17gal4_fruFLP_uas_stop_mcd8gfp male
	dpr 17 male brain 2	3	18							E7	4-7day_dpr17gal4_fruFLP_uas_stop_mcd8gfp male 2
	dpr 17 male brain 3	6	20							D8	4-7day_dpr17gal4_fruFLP_uas_stop_mcd8gfp male 3
	dpr 17 male brain 4	15	2							R7	4-7day_dpr17gal4_fruFLP_uas_stop_mcd8gfp male 4
	dpr 17 male brain 5	6	20							R2	4-7day_dpr17gal4_fruFLP_uas_stop_mcd8gfp male 5
	dpr 17 male VNC 1			6	1	5	3	5	8	L6	4-7day_dpr17gal4_fruFLP_uas_stop_mcd8gfp male VNC
	dpr 17 male VNC 2			3	4	3	0	0	7	R6	4-7day_dpr17gal4_fruFLP_uas_stop_mcd8gfp male VNC 2
	dpr 17 male VNC 3			7	7	15	12	7	21	N8	4-7day_dpr17gal4_fruFLP_uas_stop_mcd8gfp male VNC 3
	dpr 17 male VNC 4			4	8	7	7	9	13	K4	4-7day_dpr17gal4_fruFLP_uas_stop_mcd8gfp male VNC 4
	dpr 17 male VNC 5			3	6	19	6	8	15	D4	4-7day_dpr17gal4_fruFLP_uas_stop_mcd8gfp male VNC 5
	dpr 18 female brain 1	16	21							BS_J9	4-7daysDpr18GAL4_UASstopsmGDPmycstop_FruFLP female
	dpr 18 female brain 2	13	14							BS_K7	4-7daysDpr18GAL4_UASstopsmGDPmycstop_FruFLP female 5
	dpr 18 female brain 3	13	9							BS_Q2	4-7daysDpr18GAL4_UASstopsmGDPmycstop_FruFLP female 2
	dpr 18 female brain 4	17	9							BS_C8	4-7daysDpr18GAL4_UASstopsmGDPmycstop_FruFLP female 4
	dpr 18 female brain 5	16	13							BS_G7	4-7daysDpr18GAL4_UASstopsmGDPmycstop_FruFLP female 3
	dpr 18 female VNC 1			0	2	9	6	3	11	BS_A1	4-7daysDpr18GAL4_UASstopsmGDPmycstop_FruFLP female VNC
	dpr 18 female VNC 2			6	9	11	5	6	14	BS_A4	4-7daysDpr18GAL4_UASstopsmGDPmycstop_FruFLP female VNC 4
	dpr 18 female VNC 3			7	2	9	7	13	16	BS_O7	4-7daysDpr18GAL4_UASstopsmGDPmycstop_FruFLP female VNC 5
	dpr 18 female VNC 4			5	6	12	8	12	14	BS_P9	4-7daysDpr18GAL4_UASstopsmGDPmycstop_FruFLP female VNC 3
	dpr 18 female VNC 5			6	3	15	10	7	14	BS_Q1	4-7daysDpr18GAL4_UASstopsmGDPmycstop_FruFLP female VNC 2
	dpr 18 male brain 1	18	21							BS_D9	4-7daysDpr18GAL4_UASstopsmGDPmycstop_FruFLP male 4
	dpr 18 male brain 2	16	20							BS_M1	4-7daysDpr18GAL4_UASstopsmGDPmycstop_FruFLP male 5
	dpr 18 male brain 3	24	25							BS_M2	4-7daysDpr18GAL4_UASstopsmGDPmycstop_FruFLP male 6
	dpr 18 male brain 4	24	29							BS_O2	4-7daysDpr18GAL4_UASstopsmGDPmycstop_FruFLP male 3
	dpr 18 male brain 5	4	32							BS_S8	4-7daysDpr18GAL4_UASstopsmGDPmycstop_FruFLP male
	dpr 18 male VNC 1			6	16	21	12	8	23	BS_C1	4-7daysDpr18GAL4_UASstopsmGDPmycstop_FruFLP male VNC 3
	dpr 18 male VNC 2			4	17	18	12	6	16	BS_E6	4-7daysDpr18GAL4_UASstopsmGDPmycstop_FruFLP male VNC 4
	dpr 18 male VNC 3			8	11	10	12	16	12	BS_E7	4-7daysDpr18GAL4_UASstopsmGDPmycstop_FruFLP male VNC 5
	dpr 18 male VNC 4			8	4	11	7	7	18	BS_O6	4-7daysDpr18GAL4_UASstopsmGDPmycstop_FruFLP male VNC 2
	dpr 18 male VNC 5			5	13	24	12	12	31	BS_P1	4-7daysDpr18GAL4_UASstopsmGDPmycstop_FruFLP male VNC

## Sheet: Cell Count Calculations
A key for columns D-L is provided in 'items scored' in Read_Me sheet, with definitions for abbreviations	Abbreviated genotype	Anterior Midbrain	mcAL	VNC Top	VNC T1	VNC T2 wing	VNC T2	VNC T3	Abdominal ganglion	Internal Lab Notation: Blinded Image File name	Internal Lab Notation: Confocal Image File Name
	Highest Cell Body Count	50	50	15	34	47	35	31	55
	DIP alpha female brain 1	3	11							K2	4d_female_DIPalpha_55810_fruflp_4_20180920
	DIP alpha female brain 2	8	13							L2	4d_female_DIPalpha_55810_fruflp_1_20180917
	DIP alpha female brain 3	7	12							P9	4d_female_DIPalpha_55810_fruflp_5_20180921
	DIP alpha female brain 4	9	8							Q1	4d_female_DIPalpha_55810_fruflp_2_20180918
	DIP alpha female brain 5	5	11							Q9	4d_female_DIPalpha_55810_fruflp_3_20180919
	Averaged cell body counts	6.4	11
	Dividing by highest count	0.128	0.22
	DIP alpha female VNC 1			1	0	3	2	1	4	BB6	6d_female_vnc_DIPalpha_55810_fruflp_3_20181106
	DIP alpha female VNC 2			0	1	2	2	2	4	BB8	6d_female_vnc_DIPalpha_55810_fruflp_2_20181106
	DIP alpha female VNC 3			1	0	5	3	3	2	DD6	6d_female_vnc_DIPalpha_55810_fruflp_6_20181106
	DIP alpha female VNC 4			0	0	1	3	6	1	FF9	6d_female_vnc_DIPalpha_55810_fruflp_4_20181106
	DIP alpha female VNC 5			0	0	3	4	2	3	GG7	6d_female_vnc_DIPalpha_55810_fruflp_5_20181106
	Averaged cell body counts			0.4	0.2	2.8	2.8	2.8	2.8
	Dividing by highest count			0.0266667	0.00588235	0.0595745	0.08	0.0903226	0.0509091
	DIP alpha male brain 1	0	14							K5	4d_male_DIPalpha_55810_fruflp_4_20180920
	DIP alpha male brain 2	0	15							L7	4d_male_DIPalpha_55810_fruflp_1_20180917
	DIP alpha male brain 3	0	12							M3	4d_male_DIPalpha_55810_fruflp_6_20180921
	DIP alpha male brain 4	0	14							N2	4d_male_DIPalpha_55810_fruflp_3_20180919
	DIP alpha male brain 5	1	11							N5	4d_male_DIPalpha_55810_fruflp_2_20180918
	Averaged cell body counts	0.2	13.2
	Dividing by highest count	0.004	0.264
	DIP alpha male VNC 1			0	0	1	4	3	7	CC0	6d_male_vnc_DIPalpha_55810_fruflp_2_20181106
	DIP alpha male VNC 2			0	1	4	0	1	2	CC6	6d_male_vnc_DIPalpha_55810_fruflp_5_20181106
	DIP alpha male VNC 3			0	3	0	1	1	5	EE3	6d_male_vnc_DIPalpha_55810_fruflp_4_20181106
	DIP alpha male VNC 4			0	0	3	0	0	4	FF8	6d_male_vnc_DIPalpha_55810_fruflp_3_20181106
	DIP alpha male VNC 5			0	2	4	2	2	2	GG6	6d_male_vnc_DIPalpha_55810_fruflp_1_20181106
	Averaged cell body counts			0	1.2	2.4	1.4	1.4	4
	Dividing by highest count			0	0.0352941	0.0510638	0.04	0.0451613	0.0727273
	DIP beta female brain 1	4	1							K7	4-7day_DIPBetagal4_fruFLP_uas_stop_mcd8gfp female5
	DIP beta female brain 2	13	18							P0	4-7day_DIPBetagal4_fruFLP_uas_stop_mcd8gfp female1
	DIP beta female brain 3	3	20							Q2	4-7day_DIPBetagal4_fruFLP_uas_stop_mcd8gfp female2
	DIP beta female brain 4	9	7							R0	4-7day_DIPBetagal4_fruFLP_uas_stop_mcd8gfp female3
	DIP beta female brain 5	9	16							R9	4-7day_DIPBetagal4_fruFLP_uas_stop_mcd8gfp female4
	Averaged cell body counts	7.6	12.4
	Dividing by highest count	0.152	0.248
	DIP beta female VNC 1			1	0	13	0	0	16	AA0	4-7day_DIPBetagal4_fruFLP_uas_stop_mcd8gfp female 3
	DIP beta female VNC 2			2	0	10	0	0	6	AA6	4-7day_DIPBetagal4_fruFLP_uas_stop_mcd8gfp female 4
	DIP beta female VNC 3			4	0	13	0	1	9	BB2	4-7day_DIPBetagal4_fruFLP_uas_stop_mcd8gfp female 1
	DIP beta female VNC 4			0	0	7	1	0	7	EE8	4-7day_DIPBetagal4_fruFLP_uas_stop_mcd8gfp female 2
	DIP beta female VNC 5			1	3	14	5	2	13	FF6	4-7day_DIPBetagal4_fruFLP_uas_stop_mcd8gfp female 5
	Averaged cell body counts			1.6	0.6	11.4	1.2	0.6	10.2
	Dividing by highest count			0.106667	0.0176471	0.242553	0.0342857	0.0193548	0.185455
	DIP beta male brain 1	6	10							J1	4-7day_DIPBetagal4_fruFLP_uas_stop_mcd8gfp male5
	DIP beta male brain 2	3	2							M2	4-7day_DIPBetagal4_fruFLP_uas_stop_mcd8gfp male2
	DIP beta male brain 3	3	4							N0	4-7day_DIPBetagal4_fruFLP_uas_stop_mcd8gfp male1
	DIP beta male brain 4	6	10							Q0	4-7day_DIPBetagal4_fruFLP_uas_stop_mcd8gfp male3
	DIP beta male brain 5	14	13							R5	4-7day_DIPBetagal4_fruFLP_uas_stop_mcd8gfp male4
	Averaged cell body counts	6.4	7.8
	Dividing by highest count	0.128	0.156
	DIP beta male VNC 1			0	0	4	0	0	8	AA4	4-7day_DIPBetagal4_fruFLP_uas_stop_mcd8gfp male VNC 4
	DIP beta male VNC 2			NA	3	6	2	1	18	CC9	4-7day_DIPBetagal4_fruFLP_uas_stop_mcd8gfp male VNC 5
	DIP beta male VNC 3			6	0	23	3	2	17	DD3	4-7day_DIPBetagal4_fruFLP_uas_stop_mcd8gfp male VNC 3
	DIP beta male VNC 4			2	7	7	10	7	NA	FF4	4-7day_DIPBetagal4_fruFLP_uas_stop_mcd8gfp male VNC 1
	DIP beta male VNC 5			NA	NA	NA	NA	NA	NA	GG5	4-7day_DIPBetagal4_fruFLP_uas_stop_mcd8gfp male VNC 2
	Averaged cell body counts			2.66667	2.5	10	3.75	2.5	14.3333
	Dividing by highest count			0.177778	0.0735294	0.212766	0.107143	0.0806452	0.260606
	DIP delta female brain 1	2	0							K9	6d_female_DIPdelta_55810_fruflp_6_20180926
	DIP delta female brain 2	1	0							L9	6d_female_DIPdelta_55810_fruflp_16_20180929
	DIP delta female brain 3	1	0							P3	6d_female_DIPdelta_55810_fruflp_2_20180925
	DIP delta female brain 4	3	0							P6	6d_female_DIPdelta_55810_fruflp_7_20180927
	DIP delta female brain 5	2	0							P7	6d_female_DIPdelta_55810_fruflp_15_20180928
	Averaged cell body counts	1.8	0
	Dividing by highest count	0.036	0
	DIP delta female VNC 1			4	0	4	7	0	4	AA8	6d_female_DIPdelta_VNC_55810_fruflp_3_20190201
	DIP delta female VNC 2			1	1	5	0	1	8	CC5	6d_female_DIPdelta_VNC_55810_fruflp_4_20190201
	DIP delta female VNC 3			0	2	3	11	4	15	EE4	6d_female_DIPdelta_VNC_55810_fruflp_1_20181005
	DIP delta female VNC 4			0	0	2	6	1	6	HH3	6d_female_DIPdelta_VNC_55810_fruflp_2_20181005
	DIP delta female VNC 5			3	0	8	5	3	0	HH5	6d_female_DIPdelta_VNC_55810_fruflp_5_20190201
	Averaged cell body counts			1.6	0.6	4.4	5.8	1.8	6.6
	Dividing by highest count			0.106667	0.0176471	0.093617	0.165714	0.0580645	0.12
	DIP delta male brain 1	0	0							J0	6d_male_DIPdelta_55810_fruflp_7_20180929
	DIP delta male brain 2	0	0							L6	6d_male_DIPdelta_55810_fruflp_6_20180928
	DIP delta male brain 3	3	0							M7	6d_male_DIPdelta_55810_fruflp_2_20180925
	DIP delta male brain 4	2	0							M8	6d_male_DIPdelta_55810_fruflp_4_20180927
	DIP delta male brain 5	2	0							P2	6d_male_DIPdelta_55810_fruflp_3_20180926
	Averaged cell body counts	1.4	0
	Dividing by highest count	0.028	0
	DIP delta male VNC 1			0	0	10	12	9	16	DD8	6d_male_DIPdelta_VNC_55810_fruflp_5_20190201
	DIP delta male VNC 2			1	0	4	13	0	7	EE5	6d_male_DIPdelta_VNC_55810_fruflp_2_20181005
	DIP delta male VNC 3			0	0	13	17	4	16	FF2	6d_male_DIPdelta_VNC_55810_fruflp_1_20181005
	DIP delta male VNC 4			2	0	9	18	10	20	HH0	6d_male_DIPdelta_VNC_55810_fruflp_6_20190201
	DIP delta male VNC 5			0	0	9	15	2	13	HH6	6d_male_DIPdelta_VNC_55810_fruflp_4_20190201
	Averaged cell body counts			0.6	0	9	15	5	14.4
	Dividing by highest count			0.04	0	0.191489	0.428571	0.16129	0.261818
	DIP epsilon female brain 1	2	NA							J3	4-7day_DIPEpsilongal4_fruFLP_uas_stop_mcd8gfp female3
	DIP epsilon female brain 2	4	11							K1	4-7day_DIPEpsilongal4_fruFLP_uas_stop_mcd8gfp female1
	DIP epsilon female brain 3	3	16							L4	4-7day_DIPEpsilongal4_fruFLP_uas_stop_mcd8gfp female5
	DIP epsilon female brain 4	2	10							N8	4-7day_DIPEpsilongal4_fruFLP_uas_stop_mcd8gfp female2
	DIP epsilon female brain 5	1	15							R4	4-7day_DIPEpsilongal4_fruFLP_uas_stop_mcd8gfp female4
	Averaged cell body counts	2.4	13
	Dividing by highest count	0.048	0.26
	DIP epsilon female VNC 1			5	0	12	1	6	8	BB1	4-7day_DIPepsilongal4_fruFLP_uas_stop_mcd8gfp female VNC 5
	DIP epsilon female VNC 2			1	0	4	0	1	NA	BB4	4-7day_DIPepsilongal4_fruFLP_uas_stop_mcd8gfp female VNC 2
	DIP epsilon female VNC 3			4	0	17	4	7	12	FF0	4-7day_DIPepsilongal4_fruFLP_uas_stop_mcd8gfp female VNC 4
	DIP epsilon female VNC 4			1	0	14	3	0	11	FF5	4-7day_DIPepsilongal4_fruFLP_uas_stop_mcd8gfp female VNC 3
	DIP epsilon female VNC 5			0	0	9	2	2	3	HH2	4-7day_DIPepsilongal4_fruFLP_uas_stop_mcd8gfp female VNC 1
	Averaged cell body counts			2.2	0	11.2	2	3.2	8.5
	Dividing by highest count			0.146667	0	0.238298	0.0571429	0.103226	0.154545
	DIP epsilon male brain 1	1	11							K3	4-7day_DIPEpsilongal4_fruFLP_uas_stop_mcd8gfp male7
	DIP epsilon male brain 2	2	14							L8	4-7day_DIPEpsilongal4_fruFLP_uas_stop_mcd8gfp male1
	DIP epsilon male brain 3	2	12							M0	4-7day_DIPEpsilongal4_fruFLP_uas_stop_mcd8gfp male6
	DIP epsilon male brain 4	0	10							M6	4-7day_DIPEpsilongal4_fruFLP_uas_stop_mcd8gfp male2
	DIP epsilon male brain 5	1	5							N3	4-7day_DIPEpsilongal4_fruFLP_uas_stop_mcd8gfp male4
	Averaged cell body counts	1.2	10.4
	Dividing by highest count	0.024	0.208
	DIP epsilon male VNC 1			0	0	12	0	0	NA	AA2	4-7day_DIPepsilongal4_fruFLP_uas_stop_mcd8gfp male VNC 2
	DIP epsilon male VNC 2			0	1	14	11	6	11	AA9	4-7day_DIPepsilongal4_fruFLP_uas_stop_mcd8gfp male VNC 5
	DIP epsilon male VNC 3			0	1	16	1	6	13	BB3	4-7day_DIPepsilongal4_fruFLP_uas_stop_mcd8gfp male VNC 1
	DIP epsilon male VNC 4			1	0	9	1	1	8	BB7	4-7day_DIPepsilongal4_fruFLP_uas_stop_mcd8gfp male VNC 3
	DIP epsilon male VNC 5			0	0	2	2	0	9	DD0	4-7day_DIPepsilongal4_fruFLP_uas_stop_mcd8gfp male VNC 4
	Averaged cell body counts			0.2	0.4	10.6	3	2.6	10.25
	Dividing by highest count			0.0133333	0.0117647	0.225532	0.0857143	0.083871	0.186364
	DIP eta female brain 1	3	1							J9	4d_female_DIPeta_55810_fruflp_3_20180918
	DIP eta female brain 2	0	3							K4	4d_female_DIPeta_55810_fruflp_2_20180918
	DIP eta female brain 3	0	0							M4	6d_female_DIPeta_55810_fruflp_5_20180918
	DIP eta female brain 4	7	0							N4	6d_female_DIPeta_55810_fruflp_4_20180918
	DIP eta female brain 5	5	1							P1	4d_female_DIPeta_55810_fruflp_1_20190313
	Averaged cell body counts	3	1
	Dividing by highest count	0.06	0.02
	DIP eta female VNC 1			2	0	8	0	3	2	AA5	6d_female_DIPeta_vnc_55810_fruflp_2_20181005
	DIP eta female VNC 2			6	0	6	0	1	NA	DD9	4d_female_DIPeta_vnc_55810_fruflp_4_20181005
	DIP eta female VNC 3			3	4	15	2	3	4	EE6	6d_female_DIPeta_vnc_55810_fruflp_1_20181005
	DIP eta female VNC 4			3	0	6	0	0	1	GG8	4d_female_DIPeta_vnc_55810_fruflp_3_20181005
	DIP eta female VNC 5			5	2	3	2	1	1	HH7	4d_female_DIPeta_vnc_55810_fruflp_5_20181005
	Averaged cell body counts			3.8	1.2	7.6	0.8	1.6	2
	Dividing by highest count			0.253333	0.0352941	0.161702	0.0228571	0.0516129	0.0363636
	DIP eta male brain 1	21	1							J7	6d_male_DIPeta_55810_fruflp_3_20180918
	DIP eta male brain 2	19	2							K6	6d_male_DIPeta_55810_fruflp_1_20180918
	DIP eta male brain 3	12	0							L1	6d_male_DIPeta_55810_fruflp_5_20180918
	DIP eta male brain 4	18	0							N7	6d_male_DIPeta_55810_fruflp_2_20180918
	DIP eta male brain 5	14	0							Q5	6d_male_DIPeta_55810_fruflp_4_20180918
	Averaged cell body counts	16.8	0.6
	Dividing by highest count	0.336	0.012
	DIP eta male VNC 1			5	2	10	4	1	1	AA7	6d_male_VNC_DIPeta_55810_fruflp_2_20180918
	DIP eta male VNC 2			5	2	12	4	3	2	BB9	6d_male_VNC_DIPeta_55810_fruflp_5_20180918
	DIP eta male VNC 3			4	0	20	2	4	3	CC7	6d_male_VNC_DIPeta_55810_fruflp_4_20180918
	DIP eta male VNC 4			6	0	17	9	10	3	DD5	6d_male_VNC_DIPeta_55810_fruflp_3_20181005
	DIP eta male VNC 5			4	2	13	4	6	2	HH9	6d_male_VNC_DIPeta_55810_fruflp_7_20180918
	Averaged cell body counts			4.8	1.2	14.4	4.6	4.8	2.2
	Dividing by highest count			0.32	0.0352941	0.306383	0.131429	0.154839	0.04
	DIP gamma female brain 1	14	21							J8	6d_female_DIPGamma_55810_fruflp_7_20180925
	DIP gamma female brain 2	8	12							K0	6d_female_DIPGamma_55810_fruflp_3_20180925
	DIP gamma female brain 3	6	16							M5	6d_female_DIPGamma_55810_fruflp_4_20180925
	DIP gamma female brain 4	0	15							N6	6d_female_DIPGamma_55810_fruflp_5_20180925
	DIP gamma female brain 5	5	15							Q3	6d_female_DIPGamma_55810_fruflp_6_20180925
	Averaged cell body counts	6.6	15.8
	Dividing by highest count	0.132	0.316
	DIP gamma female VNC 1			0	0	0	8	3	8	CC1	6d__female_DIPgamma_VNC_55810_fruflp_4_20180918
	DIP gamma female VNC 2			3	0	3	3	5	16	CC4	6d__female_DIPgamma_VNC_55810_fruflp_2_20180918
	DIP gamma female VNC 3			5	0	10	6	5	22	EE1	6d__female_DIPgamma_VNC_55810_fruflp_3_20180918
	DIP gamma female VNC 4			8	3	5	6	15	17	FF1	6d__female_DIPgamma_VNC_55810_fruflp_1_20180918
	DIP gamma female VNC 5			9	0	6	0	5	10	GG4	7d__female_DIPgamma_VNC_55810_fruflp_5_20190220
	Averaged cell body counts			5	0.6	4.8	4.6	6.6	14.6
	Dividing by highest count			0.333333	0.0176471	0.102128	0.131429	0.212903	0.265455
	DIP gamma male brain 1	5	25							J5	6d_male_DIPGamma_55810_fruflp_4_20180918
	DIP gamma male brain 2	15	17							P8	6d_male_DIPGamma_55810_fruflp_5_20180918
	DIP gamma male brain 3	24	20							Q6	6d_male_DIPGamma_55810_fruflp_8_20180918
	DIP gamma male brain 4	32	20							R6	6d_male_DIPGamma_55810_fruflp_2_20180918
	DIP gamma male brain 5	15	16							R8	6d_male_DIPGamma_55810_fruflp_7_20180918
	Averaged cell body counts	18.2	19.6
	Dividing by highest count	0.364	0.392
	DIP gamma male VNC 1			6	0	2	5	1	12	AA3	6d__male_DIPgamma_VNC_55810_fruflp_1_20180918
	DIP gamma male VNC 2			0	1	0	5	1	11	BB0	6d__male_DIPgamma_VNC_55810_fruflp_2_20180918
	DIP gamma male VNC 3			4	0	2	7	4	13	CC3	6d__male_DIPgamma_VNC_55810_fruflp_3_20180918
	DIP gamma male VNC 4			9	0	12	3	0	17	DD4	6d__male_DIPgamma_VNC_55810_fruflp_5_20180918
	DIP gamma male VNC 5			NA	NA	NA	NA	NA	NA	HH1	6d__male_DIPgamma_VNC_55810_fruflp_4_20180918
	Averaged cell body counts			4.75	0.25	4	5	1.5	13.25
	Dividing by highest count			0.316667	0.00735294	0.0851064	0.142857	0.0483871	0.240909
	DIP theta female brain 1	16	14							J2	4-7day_DIPThetagal4_fruFLP_uas_stop_mcd8gfp female3
	DIP theta female brain 2	7	12							L5	4-7day_DIPThetagal4_fruFLP_uas_stop_mcd8gfp female4
	DIP theta female brain 3	16	11							M1	4-7day_DIPThetagal4_fruFLP_uas_stop_mcd8gfp female2
	DIP theta female brain 4	20	12							N9	4-7day_DIPThetagal4_fruFLP_uas_stop_mcd8gfp female1
	DIP theta female brain 5	4	11							P4	4-7day_DIPThetagal4_fruFLP_uas_stop_mcd8gfp female5
	Averaged cell body counts	12.6	12
	Dividing by highest count	0.252	0.24
	DIP theta female VNC 1			5	2	10	0	0	9	AA1	4-7day_DIPthetagal4_fruFLP_uas_stop_mcd8gfp female VNC 1
	DIP theta female VNC 2			0	0	10	3	8	10	CC2	4-7day_DIPthetagal4_fruFLP_uas_stop_mcd8gfp female VNC 5
	DIP theta female VNC 3			2	0	10	1	3	5	EE2	4-7day_DIPthetagal4_fruFLP_uas_stop_mcd8gfp female VNC 3
	DIP theta female VNC 4			2	3	10	5	0	8	GG0	4-7day_DIPthetagal4_fruFLP_uas_stop_mcd8gfp female VNC 4
	DIP theta female VNC 5			3	0	9	3	4	4	GG9	4-7day_DIPthetagal4_fruFLP_uas_stop_mcd8gfp female VNC 2
	Averaged cell body counts			2.4	1	9.8	2.4	3	7.2
	Dividing by highest count			0.16	0.0294118	0.208511	0.0685714	0.0967742	0.130909
	DIP theta male brain 1	0	NA							K8	4-7day_DIPThetagal4_fruFLP_uas_stop_mcd8gfp male4
	DIP theta male brain 2	10	8							L3	4-7day_DIPThetagal4_fruFLP_uas_stop_mcd8gfp male3
	DIP theta male brain 3	7	14							P5	4-7day_DIPThetagal4_fruFLP_uas_stop_mcd8gfp male2
	DIP theta male brain 4	6	11							Q7	4-7day_DIPThetagal4_fruFLP_uas_stop_mcd8gfp male1
	DIP theta male brain 5	10	16							R3	4-7day_DIPThetagal4_fruFLP_uas_stop_mcd8gfp male7
	Averaged cell body counts	6.6	12.25
	Dividing by highest count	0.132	0.245
	DIP theta male VNC 1			5	4	14	13	8	18	CC8	4-7day_DIPthetagal4_fruFLP_uas_stop_mcd8gfp male VNC 5
	DIP theta male VNC 2			2	9	4	9	0	9	DD1	4-7day_DIPthetagal4_fruFLP_uas_stop_mcd8gfp male VNC 7
	DIP theta male VNC 3			3	8	4	7	6	13	DD7	4-7day_DIPthetagal4_fruFLP_uas_stop_mcd8gfp male VNC 3
	DIP theta male VNC 4			2	0	13	1	6	21	EE9	4-7day_DIPthetagal4_fruFLP_uas_stop_mcd8gfp male VNC 4
	DIP theta male VNC 5			1	0	16	6	0	20	GG2	4-7day_DIPthetagal4_fruFLP_uas_stop_mcd8gfp male VNC 8
	Averaged cell body counts			2.6	4.2	10.2	7.2	4	16.2
	Dividing by highest count			0.173333	0.123529	0.217021	0.205714	0.129032	0.294545
	DIP zeta female brain 1	7	12							L0	4-7day_DIPZetagal4_fruFLP_uas_stop_mcd8gfp female6
	DIP zeta female brain 2	3	4							M9	4-7day_DIPZetagal4_fruFLP_uas_stop_mcd8gfp female1
	DIP zeta female brain 3	3	6							N1	4-7day_DIPZetagal4_fruFLP_uas_stop_mcd8gfp female2
	DIP zeta female brain 4	3	8							Q4	4-7day_DIPZetagal4_fruFLP_uas_stop_mcd8gfp female4
	DIP zeta female brain 5	4	6							R1	4-7day_DIPZetagal4_fruFLP_uas_stop_mcd8gfp female3
	Averaged cell body counts	4	7.2
	Dividing by highest count	0.08	0.144
	DIP zeta female VNC 1			NA	NA	NA	NA	NA	NA	BB5	DIPzeta_Female_VNC_3
	DIP zeta female VNC 2			1	0	3	0	0	3	DD2	DIPzeta_Female_VNC_2
	DIP zeta female VNC 3			0	0	2	2	0	4	GG3	DIPzeta_Female_VNC_4
	DIP zeta female VNC 4			0	0	10	0	0	9	HH4	DIPzeta_Female_VNC_1
	DIP zeta female VNC 5			0	0	8	3	0	4	HH8	DIPzeta_Female_VNC_5
	Averaged cell body counts			0.25	0	5.75	1.25	0	5
	Dividing by highest count			0.0166667	0	0.12234	0.0357143	0	0.0909091
	DIP zeta male brain 1	4	NA							J4	4-7day_DIPZetagal4_fruFLP_uas_stop_mcd8gfp male2
	DIP zeta male brain 2	1	2							J6	4-7day_DIPZetagal4_fruFLP_uas_stop_mcd8gfp male4
	DIP zeta male brain 3	4	2							Q8	4-7day_DIPZetagal4_fruFLP_uas_stop_mcd8gfp male1
	DIP zeta male brain 4	3	NA							R2	4-7day_DIPZetagal4_fruFLP_uas_stop_mcd8gfp male3
	DIP zeta male brain 5	5	5							R7	4-7day_DIPZetagal4_fruFLP_uas_stop_mcd8gfp male5
	Averaged cell body counts	3.4	3
	Dividing by highest count	0.068	0.06
	DIP zeta male VNC 1			0	0	0	0	0	2	EE0	DIPzeta_male_VNC_1
	DIP zeta male VNC 2			0	8	0	0	0	3	EE7	DIPzeta_male_VNC_4
	DIP zeta male VNC 3			2	0	3	0	0	0	FF3	DIPzeta_male_VNC_2
	DIP zeta male VNC 4			3	0	4	2	5	6	FF7	DIPzeta_male_VNC_5
	DIP zeta male VNC 5			0	0	9	0	0	4	GG1	DIPzeta_male_VNC_3
	Averaged cell body counts			1	1.6	3.2	0.4	1	3
	Dividing by highest count			0.0666667	0.0470588	0.0680851	0.0114286	0.0322581	0.0545455
	dpr 1 female brain 1	26	26							I7	4-7day_dpr1gal4_fruFLP_uas_stop_mcd8gfp female
	dpr 1 female brain 2	17	31							J9	4-7day_dpr1gal4_fruFLP_uas_stop_mcd8gfp female 2
	dpr 1 female brain 3	7	3							F2	4-7day_dpr1gal4_fruFLP_uas_stop_mcd8gfp female 3
	dpr 1 female brain 4	11	26							K8	4-7day_dpr1gal4_fruFLP_uas_stop_mcd8gfp female 4
	dpr 1 female brain 5	18	22							H6	4-7day_dpr1gal4_fruFLP_uas_stop_mcd8gfp female 5
	Averaged cell body counts	15.8	21.6
	Dividing by highest count	0.316	0.432
	dpr 1 female VNC 1			5	0	14	9	4	10	K6	4-7day_dpr1gal4_fruFLP_uas_stop_mcd8gfp female VNC
	dpr 1 female VNC 2			3	0	15	6	6	17	J7	4-7day_dpr1gal4_fruFLP_uas_stop_mcd8gfp female VNC 2
	dpr 1 female VNC 3			3	NA	13	19	11	20	H9	4-7day_dpr1gal4_fruFLP_uas_stop_mcd8gfp female VNC 3
	dpr 1 female VNC 4			0	1	17	8	14	9	A1	4-7day_dpr1gal4_fruFLP_uas_stop_mcd8gfp female VNC 4
	dpr 1 female VNC 5			5	2	21	9	5	11	O8	4-7day_dpr1gal4_fruFLP_uas_stop_mcd8gfp female VNC 5
	Averaged cell body counts			3.2	0.75	16	10.2	8	13.4
	Dividing by highest count			0.213333	0.0220588	0.340426	0.291429	0.258065	0.243636
	dpr 1 male brain 1	22	34							K1	4-7day_dpr1gal4_fruFLP_uas_stop_mcd8gfp male
	dpr 1 male brain 2	NA	NA							K7	4-7day_dpr1gal4_fruFLP_uas_stop_mcd8gfp male 2
	dpr 1 male brain 3	NA	NA							D2	4-7day_dpr1gal4_fruFLP_uas_stop_mcd8gfp male 3
	dpr 1 male brain 4	20	37							B1	4-7day_dpr1gal4_fruFLP_uas_stop_mcd8gfp male 4
	dpr 1 male brain 5	27	32							O2	4-7day_dpr1gal4_fruFLP_uas_stop_mcd8gfp male 5
	Averaged cell body counts	23	34.3333
	Dividing by highest count	0.46	0.686667
	dpr 1 male VNC 1			4	5	27	8	12	25	L1	4-7day_dpr1gal4_fruFLP_uas_stop_mcd8gfp male VNC
	dpr 1 male VNC 2			9	1	36	15	5	42	H5	4-7day_dpr1gal4_fruFLP_uas_stop_mcd8gfp male VNC 2
	dpr 1 male VNC 3			NA	NA	NA	NA	NA	NA	P3	4-7day_dpr1gal4_fruFLP_uas_stop_mcd8gfp male VNC 3
	dpr 1 male VNC 4			4	2	NA	4	9	NA	M3	4-7day_dpr1gal4_fruFLP_uas_stop_mcd8gfp male VNC 4
	dpr 1 male VNC 5			3	3	19	11	11	29	C2	4-7day_dpr1gal4_fruFLP_uas_stop_mcd8gfp male VNC 5
	Averaged cell body counts			5	2.75	27.3333	9.5	9.25	32
	Dividing by highest count			0.333333	0.0808824	0.58156	0.271429	0.298387	0.581818
	dpr 2 female brain 1	19	37							BS_A3	4-7day_dpr2gal4_fruFLP_uas_stop_mcd8gfp female 2
	dpr 2 female brain 2	11	9							BS_D5	4-7day_dpr2gal4_fruFLP_uas_stop_mcd8gfp female 5
	dpr 2 female brain 3	24	23							BS_E1	4-7day_dpr2gal4_fruFLP_uas_stop_mcd8gfp female 4
	dpr 2 female brain 4	22	25							BS_Q4	4-7day_dpr2gal4_fruFLP_uas_stop_mcd8gfp female 3
	dpr 2 female brain 5	18	32							BS_S7	4-7day_dpr2gal4_fruFLP_uas_stop_mcd8gfp female
	Averaged cell body counts	18.8	25.2
	Dividing by highest count	0.376	0.504
	dpr 2 female VNC 1			6	7	16	9	9	17	BS_B2	4-7day_dpr2gal4_fruFLP_uas_stop_mcd8gfp female VNC
	dpr 2 female VNC 2			1	4	9	6	4	17	BS_E3	4-7day_dpr2gal4_fruFLP_uas_stop_mcd8gfp female VNC 3
	dpr 2 female VNC 3			7	6	12	12	6	23	BS_E9	4-7day_dpr2gal4_fruFLP_uas_stop_mcd8gfp female VNC 2
	dpr 2 female VNC 4			9	2	14	7	2	15	BS_O5	4-7day_dpr2gal4_fruFLP_uas_stop_mcd8gfp female VNC 5
	dpr 2 female VNC 5			5	1	10	6	4	13	BS_T4	4-7day_dpr2gal4_fruFLP_uas_stop_mcd8gfp female VNC 4
	Averaged cell body counts			5.6	4	12.2	8	5	17
	Dividing by highest count			0.373333	0.117647	0.259574	0.228571	0.16129	0.309091
	dpr 2 male brain 1	29	33							BS_A5	4-7day_dpr2gal4_fruFLP_uas_stop_mcd8gfp male 6
	dpr 2 male brain 2	35	45							BS_F1	4-7day_dpr2gal4_fruFLP_uas_stop_mcd8gfp male 2
	dpr 2 male brain 3	27	34							BS_O8	4-7day_dpr2gal4_fruFLP_uas_stop_mcd8gfp male 5
	dpr 2 male brain 4	41	50							BS_P4	4-7day_dpr2gal4_fruFLP_uas_stop_mcd8gfp male 3
	dpr 2 male brain 5	0	45							BS_Q6	4-7day_dpr2gal4_fruFLP_uas_stop_mcd8gfp male
	Averaged cell body counts	26.4	41.4
	Dividing by highest count	0.528	0.828
	dpr 2 male VNC 1			13	10	28	29	7	37	BS_B1	4-7day_dpr2gal4_fruFLP_uas_stop_mcd8gfp male VNC
	dpr 2 male VNC 2			3	5	24	24	16	35	BS_C4	4-7day_dpr2gal4_fruFLP_uas_stop_mcd8gfp male VNC 4
	dpr 2 male VNC 3			7	17	26	26	14	30	BS_M5	4-7day_dpr2gal4_fruFLP_uas_stop_mcd8gfp male VNC 3
	dpr 2 male VNC 4			4	12	20	24	2	27	BS_O9	4-7day_dpr2gal4_fruFLP_uas_stop_mcd8gfp male VNC 5
	dpr 2 male VNC 5			6	12	25	19	21	34	BS_R7	4-7day_dpr2gal4_fruFLP_uas_stop_mcd8gfp male VNC 2
	Averaged cell body counts			6.6	11.2	24.6	24.4	12	32.6
	Dividing by highest count			0.44	0.329412	0.523404	0.697143	0.387097	0.592727
	dpr 3 female brain 1	23	21							H2	4-7day_dpr3gal4_fruFLP_uas_stop_mcd8gfp female
	dpr 3 female brain 2	15	20							I8	4-7day_dpr3gal4_fruFLP_uas_stop_mcd8gfp female 2
	dpr 3 female brain 3	NA	NA							L8	4-7day_dpr3gal4_fruFLP_uas_stop_mcd8gfp female 3
	dpr 3 female brain 4	22	19							N3	4-7day_dpr3gal4_fruFLP_uas_stop_mcd8gfp female 4
	dpr 3 female brain 5	22	22							D5	4-7day_dpr3gal4_fruFLP_uas_stop_mcd8gfp female 5
	Averaged cell body counts	20.5	20.5
	Dividing by highest count	0.41	0.41
	dpr 3 female VNC 1			6	3	12	9	6	15	L2	4-7day_dpr3gal4_fruFLP_uas_stop_mcd8gfp female VNC
	dpr 3 female VNC 2			6	0	13	5	8	16	M2	4-7day_dpr3gal4_fruFLP_uas_stop_mcd8gfp female VNC 2
	dpr 3 female VNC 3			7	0	17	9	14	15	G6	4-7day_dpr3gal4_fruFLP_uas_stop_mcd8gfp female VNC 3
	dpr 3 female VNC 4			3	6	10	3	7	14	M6	4-7day_dpr3gal4_fruFLP_uas_stop_mcd8gfp female VNC 4
	dpr 3 female VNC 5			15	6	7	4	6	11	F1	4-7day_dpr3gal4_fruFLP_uas_stop_mcd8gfp female VNC 5
	Averaged cell body counts			7.4	3	11.8	6	8.2	14.2
	Dividing by highest count			0.493333	0.0882353	0.251064	0.171429	0.264516	0.258182
	dpr 3 male brain 1	6	13							D9	4-7day_dpr3gal4_fruFLP_uas_stop_mcd8gfp male
	dpr 3 male brain 2	13	21							R1	4-7day_dpr3gal4_fruFLP_uas_stop_mcd8gfp male 2
	dpr 3 male brain 3		16							G8	4-7day_dpr3gal4_fruFLP_uas_stop_mcd8gfp male 3
	dpr 3 male brain 4	17	24							E9	4-7day_dpr3gal4_fruFLP_uas_stop_mcd8gfp male 4
	dpr 3 male brain 5	8	14							N7	4-7day_dpr3gal4_fruFLP_uas_stop_mcd8gfp male 5
	Averaged cell body counts	11	17.6
	Dividing by highest count	0.22	0.352
	dpr 3 male VNC 1			5	0	17	12	NA	NA	C5	4-7day_dpr3gal4_fruFLP_uas_stop_mcd8gfp male VNC
	dpr 3 male VNC 2			6	NA	NA	13	9	15	A4	4-7day_dpr3gal4_fruFLP_uas_stop_mcd8gfp male VNC 2
	dpr 3 male VNC 3			13	9	18	19	16	23	I5	4-7day_dpr3gal4_fruFLP_uas_stop_mcd8gfp male VNC 3
	dpr 3 male VNC 4			3	8	17	12	10	NA	F4	4-7day_dpr3gal4_fruFLP_uas_stop_mcd8gfp male VNC 4
	dpr 3 male VNC 5			5	4	11	15	7	15	H4	4-7day_dpr3gal4_fruFLP_uas_stop_mcd8gfp male VNC 5
	Averaged cell body counts			6.4	5.25	15.75	14.2	10.5	17.6667
	Dividing by highest count			0.426667	0.154412	0.335106	0.405714	0.33871	0.321212
	dpr 4 female brain 1	17	16							BS_M7	4-7daysDpr4GAL4_UASstopsmGDPmycstop_FruFLP female
	dpr 4 female brain 2	8	6							BS_B3	4-7daysDpr4GAL4_UASstopsmGDPmycstop_FruFLP female 5
	dpr 4 female brain 3	8	23							BS_B7	4-7daysDpr4GAL4_UASstopsmGDPmycstop_FruFLP female 2
	dpr 4 female brain 4	13	17							BS_C5	4-7daysDpr4GAL4_UASstopsmGDPmycstop_FruFLP female 4
	dpr 4 female brain 5	13	19							BS_H5	4-7daysDpr4GAL4_UASstopsmGDPmycstop_FruFLP female 3
	Averaged cell body counts	11.8	16.2
	Dividing by highest count	0.236	0.324
	dpr 4 female VNC 1			5	5	20	11	13	16	BS_J4	4-7daysDpr4GAL4_UASstopsmGDPmycstop_FruFLP female VNC 4
	dpr 4 female VNC 2			NA	NA	NA	NA	NA	NA	BS_J5	4-7daysDpr4GAL4_UASstopsmGDPmycstop_FruFLP female VNC 7
	dpr 4 female VNC 3			2	2	15	7	5	13	BS_O4	4-7daysDpr4GAL4_UASstopsmGDPmycstop_FruFLP female VNC 5
	dpr 4 female VNC 4			6	7	13	16	9	17	BS_Q7	4-7daysDpr4GAL4_UASstopsmGDPmycstop_FruFLP female VNC 3
	dpr 4 female VNC 5			5	7	9	5	11	10	BS_T2	4-7daysDpr4GAL4_UASstopsmGDPmycstop_FruFLP female VNC 6
	Averaged cell body counts			4.5	5.25	14.25	9.75	9.5	14
	Dividing by highest count			0.3	0.154412	0.303191	0.278571	0.306452	0.254545
	dpr 4 male brain 1	15	9							BS_C2	4-7daysDpr4GAL4_UASstopsmGDPmycstop_FruFLP male 6
	dpr 4 male brain 2	10	16							BS_F7	4-7daysDpr4GAL4_UASstopsmGDPmycstop_FruFLP male
	dpr 4 male brain 3	19	19							BS_M9	4-7daysDpr4GAL4_UASstopsmGDPmycstop_FruFLP male 3
	dpr 4 male brain 4	11	22							BS_N7	4-7daysDpr4GAL4_UASstopsmGDPmycstop_FruFLP male 4
	dpr 4 male brain 5	7	29							BS_R4	4-7daysDpr4GAL4_UASstopsmGDPmycstop_FruFLP male 5
	Averaged cell body counts	12.4	19
	Dividing by highest count	0.248	0.38
	dpr 4 male VNC 1			10	5	20	2	13	18	BS_B8	4-7daysDpr4GAL4_UASstopsmGDPmycstop_FruFLP male VNC 4
	dpr 4 male VNC 2			5	12	25	16	12	21	BS_C7	4-7daysDpr4GAL4_UASstopsmGDPmycstop_FruFLP male VNC 6
	dpr 4 male VNC 3			6	20	20	13	11	19	BS_G8	4-7daysDpr4GAL4_UASstopsmGDPmycstop_FruFLP male VNC 5
	dpr 4 male VNC 4			11	15	16	7	19	26	BS_J6	4-7daysDpr4GAL4_UASstopsmGDPmycstop_FruFLP male VNC 3
	dpr 4 male VNC 5			1	3	17	13	6	16	BS_P5	4-7daysDpr4GAL4_UASstopsmGDPmycstop_FruFLP male VNC
	Averaged cell body counts			6.6	11	19.6	10.2	12.2	20
	Dividing by highest count			0.44	0.323529	0.417021	0.291429	0.393548	0.363636
	dpr 5 female brain 1	24	17							BS_E4	6d_female_dpr5_55810_fruflp_3_20180919
	dpr 5 female brain 2	17	20							BS_H7	6d_female_dpr5_55810_fruflp_6_20180919
	dpr 5 female brain 3	21	28							BS_K3	6d_female_dpr5_55810_fruflp_4_20180919
	dpr 5 female brain 4	12	18							BS_Q8	6d_female_dpr5_55810_fruflp_5_20180919
	dpr 5 female brain 5	11	5							BS_R8	6d_female_dpr5_55810_fruflp_7.1_20180919
	Averaged cell body counts	17	17.6
	Dividing by highest count	0.34	0.352
	dpr 5 female VNC 1			7	0	19	5	8	16	BS_F8	6d_female_dpr5_VNC_55810_fruflp_5_20181002
	dpr 5 female VNC 2			6	10	9	10	4	13	BS_K4	6d_female_dpr5_VNC_55810_fruflp_2_20181002
	dpr 5 female VNC 3			2	5	21	14	14	27	BS_O3	6d_female_dpr5_VNC_55810_fruflp_7_20181002
	dpr 5 female VNC 4			5	2	16	5	7	18	BS_P3	6d_female_dpr5_VNC_55810_fruflp_6_20181002
	dpr 5 female VNC 5			8	10	25	9	11	24	BS_S2	6d_female_dpr5_VNC_55810_fruflp_4_20181002
	Averaged cell body counts			5.6	5.4	18	8.6	8.8	19.6
	Dividing by highest count			0.373333	0.158824	0.382979	0.245714	0.283871	0.356364
	dpr 5 male brain 1	23	21							BS_C9	6d_male_dpr5_55810_fruflp_5_20180919
	dpr 5 male brain 2	11	30							BS_E5	6d_male_dpr5_55810_fruflp_4_20180919
	dpr 5 male brain 3	8	9							BS_J2	6d_male_dpr5_55810_fruflp_1_20180919
	dpr 5 male brain 4	23	30							BS_J8	6d_male_dpr5_55810_fruflp_2_20180919
	dpr 5 male brain 5	20	18							BS_N4	6d_male_dpr5_55810_fruflp_3_20180919
	Averaged cell body counts	17	21.6
	Dividing by highest count	0.34	0.432
	dpr 5 male VNC 1			7	19	17	28	6	38	BS_A6	7d_male_dpr5_VNC_55810_fruflp_5_20190218
	dpr 5 male VNC 2			4	18	27	23	6	34	BS_F4	7d_male_dpr5_VNC_55810_fruflp_4_20190218
	dpr 5 male VNC 3			0	16	30	33	7	29	BS_J3	6d_male_dpr5_VNC_55810_fruflp_2_20181002
	dpr 5 male VNC 4			8	5	21	24	31	21	BS_Q3	6d_male_dpr5_VNC_55810_fruflp_1_20181002
	dpr 5 male VNC 5			4	18	31	23	15	45	BS_Q5	6d_male_dpr5_VNC_55810_fruflp_3_20181002
	Averaged cell body counts			4.6	15.2	25.2	26.2	13	33.4
	Dividing by highest count			0.306667	0.447059	0.53617	0.748571	0.419355	0.607273
	dpr 6 female brain 1	18	11							BS_D2	4-7day_dpr6gal4_fruFLP_uas_stop_mcd8gfp female 4
	dpr 6 female brain 2	20	14							BS_E2	4-7day_dpr6gal4_fruFLP_uas_stop_mcd8gfp female 3
	dpr 6 female brain 3	4	4							BS_H8	4-7day_dpr6gal4_fruFLP_uas_stop_mcd8gfp female 5
	dpr 6 female brain 4	15	13							BS_N9	4-7day_dpr6gal4_fruFLP_uas_stop_mcd8gfp female
	dpr 6 female brain 5	7	14							BS_T3	4-7day_dpr6gal4_fruFLP_uas_stop_mcd8gfp female 2
	Averaged cell body counts	12.8	11.2
	Dividing by highest count	0.256	0.224
	dpr 6 female VNC 1			10	18	8	6	7	13	BS_D3	4-7day_dpr6gal4_fruFLP_uas_stop_mcd8gfp female VNC 3
	dpr 6 female VNC 2			5	8	12	9	4	15	BS_D8	4-7day_dpr6gal4_fruFLP_uas_stop_mcd8gfp female VNC 7
	dpr 6 female VNC 3			7	13	13	8	6	24	BS_G1	4-7day_dpr6gal4_fruFLP_uas_stop_mcd8gfp female VNC
	dpr 6 female VNC 4			4	4	20	11	0	NA	BS_G4	4-7day_dpr6gal4_fruFLP_uas_stop_mcd8gfp female VNC 4
	dpr 6 female VNC 5			2	5	15	9	7	15	BS_G9	4-7day_dpr6gal4_fruFLP_uas_stop_mcd8gfp female VNC 6
	Averaged cell body counts			5.6	9.6	13.6	8.6	4.8	16.75
	Dividing by highest count			0.373333	0.282353	0.289362	0.245714	0.154839	0.304545
	dpr 6 male brain 1	27	27							BS_F5	4-7day_dpr6gal4_fruFLP_uas_stop_mcd8gfp male 5
	dpr 6 male brain 2	39	18							BS_F9	4-7day_dpr6gal4_fruFLP_uas_stop_mcd8gfp male 3
	dpr 6 male brain 3	32	27							BS_R3	4-7day_dpr6gal4_fruFLP_uas_stop_mcd8gfp male 4
	dpr 6 male brain 4	34	22							BS_R6	4-7day_dpr6gal4_fruFLP_uas_stop_mcd8gfp male 7
	dpr 6 male brain 5	32	25							BS_S4	4-7day_dpr6gal4_fruFLP_uas_stop_mcd8gfp male 2
	Averaged cell body counts	32.8	23.8
	Dividing by highest count	0.656	0.476
	dpr 6 male VNC 1			10	6	19	11	11	23	BS_A7	4-7day_dpr6gal4_fruFLP_uas_stop_mcd8gfp male VNC 4
	dpr 6 male VNC 2			6	11	26	16	8	33	BS_F6	4-7day_dpr6gal4_fruFLP_uas_stop_mcd8gfp male VNC 3
	dpr 6 male VNC 3			4	17	2	15	5	19	BS_K2	4-7day_dpr6gal4_fruFLP_uas_stop_mcd8gfp male VNC
	dpr 6 male VNC 4			3	6	7	24	9	21	BS_O1	4-7day_dpr6gal4_fruFLP_uas_stop_mcd8gfp male VNC 5
	dpr 6 male VNC 5			7	13	19	21	10	27	BS_P8	4-7day_dpr6gal4_fruFLP_uas_stop_mcd8gfp male VNC 2
	Averaged cell body counts			6	10.6	14.6	17.4	8.6	24.6
	Dividing by highest count			0.4	0.311765	0.310638	0.497143	0.277419	0.447273
	dpr 8 female brain 1	21	33							K9	4-7day_dpr8gal4_fruFLP_uas_stop_mcd8gfp female
	dpr 8 female brain 2	22	32							P2	4-7day_dpr8gal4_fruFLP_uas_stop_mcd8gfp female 2
	dpr 8 female brain 3	14	13							Q9	4-7day_dpr8gal4_fruFLP_uas_stop_mcd8gfp female 3
	dpr 8 female brain 4	9	14							B2	4-7day_dpr8gal4_fruFLP_uas_stop_mcd8gfp female 4
	dpr 8 female brain 5	10	19							B4	4-7day_dpr8gal4_fruFLP_uas_stop_mcd8gfp female 5
	Averaged cell body counts	15.2	22.2
	Dividing by highest count	0.304	0.444
	dpr 8 female VNC 1			5	7	30	11	4	NA	M5	4-7day_dpr8gal4_fruFLP_uas_stop_mcd8gfp female VNC
	dpr 8 female VNC 2			5	6	26	4	10	16	O7	4-7day_dpr8gal4_fruFLP_uas_stop_mcd8gfp female VNC 2
	dpr 8 female VNC 3			6	1	20	11	10	17	D1	4-7day_dpr8gal4_fruFLP_uas_stop_mcd8gfp female VNC 3
	dpr 8 female VNC 4			0	5	22	9	14	14	G3	4-7day_dpr8gal4_fruFLP_uas_stop_mcd8gfp female VNC 4
	dpr 8 female VNC 5			9	3	24	5	17	16	C4	4-7day_dpr8gal4_fruFLP_uas_stop_mcd8gfp female VNC 5
	Averaged cell body counts			5	4.4	24.4	8	11	15.75
	Dividing by highest count			0.333333	0.129412	0.519149	0.228571	0.354839	0.286364
	dpr 8 male brain 1	6	17							B3	4-7day_dpr8gal4_fruFLP_uas_stop_mcd8gfp male
	dpr 8 male brain 2	21	16							D7	4-7day_dpr8gal4_fruFLP_uas_stop_mcd8gfp male 2
	dpr 8 male brain 3	12	19							M8	4-7day_dpr8gal4_fruFLP_uas_stop_mcd8gfp male 3
	dpr 8 male brain 4	9	14							D6	4-7day_dpr8gal4_fruFLP_uas_stop_mcd8gfp male 4
	dpr 8 male brain 5	16	18							H8	4-7day_dpr8gal4_fruFLP_uas_stop_mcd8gfp male 5
	Averaged cell body counts	12.8	16.8
	Dividing by highest count	0.256	0.336
	dpr 8 male VNC 1			3	4	34	19	16	20	G4	4-7day_dpr8gal4_fruFLP_uas_stop_mcd8gfp male VNC
	dpr 8 male VNC 2			0	8	21	10	12	19	A7	4-7day_dpr8gal4_fruFLP_uas_stop_mcd8gfp male VNC 2
	dpr 8 male VNC 3			3	7	16	22	12	26	P1	4-7day_dpr8gal4_fruFLP_uas_stop_mcd8gfp male VNC 3
	dpr 8 male VNC 4			5	5	29	4	5	17	A5	4-7day_dpr8gal4_fruFLP_uas_stop_mcd8gfp male VNC 4
	dpr 8 male VNC 5			0	10	27	20	10	30	N9	4-7day_dpr8gal4_fruFLP_uas_stop_mcd8gfp male VNC 5
	Averaged cell body counts			2.2	6.8	25.4	15	11	22.4
	Dividing by highest count			0.146667	0.2	0.540426	0.428571	0.354839	0.407273
	dpr 9 female brain 1	29	34							BS_A8	4-7day_dpr9gal4_fruFLP_uas_stop_mcd8gfp female 3
	dpr 9 female brain 2	25	36							BS_F3	4-7day_dpr9gal4_fruFLP_uas_stop_mcd8gfp female 5
	dpr 9 female brain 3	29	31							BS_K6	4-7day_dpr9gal4_fruFLP_uas_stop_mcd8gfp female 4
	dpr 9 female brain 4	21	43							BS_R1	4-7day_dpr9gal4_fruFLP_uas_stop_mcd8gfp female 2
	dpr 9 female brain 5	26	27							BS_B5	4-7day_dpr9gal4_fruFLP_uas_stop_mcd8gfp female
	Averaged cell body counts	26	34.2
	Dividing by highest count	0.52	0.684
	dpr 9 female VNC 1			7	5	22	6	6	22	BS_C6	4-7day_dpr9gal4_fruFLP_uas_stop_mcd8gfp female VNC 3
	dpr 9 female VNC 2			9	5	16	13	2	21	BS_H1	4-7day_dpr9gal4_fruFLP_uas_stop_mcd8gfp female VNC
	dpr 9 female VNC 3			8	8	16	4	7	14	BS_N5	4-7day_dpr9gal4_fruFLP_uas_stop_mcd8gfp female VNC 2
	dpr 9 female VNC 4			5	7	15	6	8	21	BS_R2	4-7day_dpr9gal4_fruFLP_uas_stop_mcd8gfp female VNC 5
	dpr 9 female VNC 5			6	7	25	16	16	18	BS_R9	4-7day_dpr9gal4_fruFLP_uas_stop_mcd8gfp female VNC 4
	Averaged cell body counts			7	6.4	18.8	9	7.8	19.2
	Dividing by highest count			0.466667	0.188235	0.4	0.257143	0.251613	0.349091
	dpr 9 male brain 1	17	12							BS_B4	4-7day_dpr9gal4_fruFLP_uas_stop_mcd8gfp male 3
	dpr 9 male brain 2	22	9							BS_D6	4-7day_dpr9gal4_fruFLP_uas_stop_mcd8gfp male 2
	dpr 9 male brain 3	42	43							BS_G6	4-7day_dpr9gal4_fruFLP_uas_stop_mcd8gfp male 4
	dpr 9 male brain 4	26	39							BS_S5	4-7day_dpr9gal4_fruFLP_uas_stop_mcd8gfp male 7
	dpr 9 male brain 5	31	23							BS_S6	4-7day_dpr9gal4_fruFLP_uas_stop_mcd8gfp male 8
	Averaged cell body counts	27.6	25.2
	Dividing by highest count	0.552	0.504
	dpr 9 male VNC 1			6	11	18	4	10	29	BS_G5	4-7day_dpr9gal4_fruFLP_uas_stop_mcd8gfp male VNC 4
	dpr 9 male VNC 2			3	6	9	4	8	26	BS_J7	4-7day_dpr9gal4_fruFLP_uas_stop_mcd8gfp male VNC
	dpr 9 male VNC 3			4	9	21	10	6	24	BS_M6	4-7day_dpr9gal4_fruFLP_uas_stop_mcd8gfp male VNC 5
	dpr 9 male VNC 4			4	4	10	6	8	23	BS_P7	4-7day_dpr9gal4_fruFLP_uas_stop_mcd8gfp male VNC 2
	dpr 9 male VNC 5			13	10	33	20	18	36	BS_Q9	4-7day_dpr9gal4_fruFLP_uas_stop_mcd8gfp male VNC 3
	Averaged cell body counts			6	8	18.2	8.8	10	27.6
	Dividing by highest count			0.4	0.235294	0.387234	0.251429	0.322581	0.501818
	dpr 10 female brain 1	13	14							L4	4d_female_dpr10_55810_fruflp_1_20180917
	dpr 10 female brain 2	11	10							E4	4d_female_dpr10_55810_fruflp_2_20180917
	dpr 10 female brain 3	2	14							Q2	4d_female_dpr10_55810_fruflp_3_20180917
	dpr 10 female brain 4		9							M1	4d_female_dpr10_55810_fruflp_4_20180917
	dpr 10 female brain 5	2	10							Q5	6d_female_dpr10_55810_fruflp_5_20180918
	Averaged cell body counts	7	11.4
	Dividing by highest count	0.14	0.228
	dpr 10 female VNC 1			6	6	21	4	9	22	P5	6d_female_dpr10_VNC_55810_fruflp_1_20181005
	dpr 10 female VNC 2			4	15	19	5	NA	NA	N6	6d_female_dpr10_VNC_55810_fruflp_2_20181005
	dpr 10 female VNC 3			3	7	13	13	16	22	M4	6d_female_dpr10_VNC_55810_fruflp_3_20181005
	dpr 10 female VNC 4			4	2	19	11	14	18	J5	7d_female_dpr10_VNC_55810_fruflp_5_20190220
	dpr 10 female VNC 5			5	2	14	12	7	25	E8	7d_female_dpr10_VNC_55810_fruflp_6_20190220
	Averaged cell body counts			4.4	6.4	17.2	9	11.5	21.75
	Dividing by highest count			0.293333	0.188235	0.365957	0.257143	0.370968	0.395455
	dpr 10 male brain 1	10	12							B8	4d_male_dpr10_55810_fruflp_1_20180917
	dpr 10 male brain 2	8	10							H7	4d_male_dpr10_55810_fruflp_2_20180917
	dpr 10 male brain 3	25	8							I2	7d_male_dpr10_55810_fruflp_4_20190217
	dpr 10 male brain 4	15	10							B9	7d_male_dpr10_55810_fruflp_5_20190217
	dpr 10 male brain 5	20	8							F3	7d_male_dpr10_55810_fruflp_6_20190217
	Averaged cell body counts	15.6	9.6
	Dividing by highest count	0.312	0.192
	dpr 10 male VNC 1			7	5	17	21	20	29	J1	6d_male_dpr10_VNC_55810_fruflp_1_20181023
	dpr 10 male VNC 2									F9	6d_male_dpr10_VNC_55810_fruflp_2_20181023
	dpr 10 male VNC 3			6	0	11	14			D3	7d_male_dpr10_VNC_55810_fruflp_3_20190220
	dpr 10 male VNC 4			6	11	15	27	11	26	H1	7d_male_dpr10_VNC_55810_fruflp_5_20190220
	dpr 10 male VNC 5			5	2	23	17	6	17	Q8	7d_male_dpr10_VNC_55810_fruflp_6_20190220
	Averaged cell body counts			6	4.5	16.5	19.75	12.3333	24
	Dividing by highest count			0.4	0.132353	0.351064	0.564286	0.397849	0.436364
	dpr 11 female brain 1									O4	4-7day_dpr11gal4_fruFLP_uas_stop_mcd8gfp female
	dpr 11 female brain 2									C8	4-7day_dpr11gal4_fruFLP_uas_stop_mcd8gfp female 2
	dpr 11 female brain 3	32	27							H3	4-7day_dpr11gal4_fruFLP_uas_stop_mcd8gfp female 3
	dpr 11 female brain 4	32	15							N5	4-7day_dpr11gal4_fruFLP_uas_stop_mcd8gfp female 4
	dpr 11 female brain 5	23	16							R3	4-7day_dpr11gal4_fruFLP_uas_stop_mcd8gfp female 5
	Averaged cell body counts	29	19.3333
	Dividing by highest count	0.58	0.386667
	dpr 11 female VNC 1			5	1	24	8	11	13	Q3	4-7day_dpr11gal4_fruFLP_uas_stop_mcd8gfp female VNC
	dpr 11 female VNC 2			5	2	6	8	6	8	Q6	4-7day_dpr11gal4_fruFLP_uas_stop_mcd8gfp female VNC 2
	dpr 11 female VNC 3			7	3	15	11	6	15	O6	4-7day_dpr11gal4_fruFLP_uas_stop_mcd8gfp female VNC 3
	dpr 11 female VNC 4			8	5	23	14	13	15	L9	4-7day_dpr11gal4_fruFLP_uas_stop_mcd8gfp female VNC 4
	dpr 11 female VNC 5			1	0	16	9	7	17	Q4	4-7day_dpr11gal4_fruFLP_uas_stop_mcd8gfp female VNC 5
	Averaged cell body counts			5.2	2.2	16.8	10	8.6	13.6
	Dividing by highest count			0.346667	0.0647059	0.357447	0.285714	0.277419	0.247273
	dpr 11 male brain 1	32	22							E1	4-7day_dpr11gal4_fruFLP_uas_stop_mcd8gfp male
	dpr 11 male brain 2	37	29							N2	4-7day_dpr11gal4_fruFLP_uas_stop_mcd8gfp male 2
	dpr 11 male brain 3	34	35							P8	4-7day_dpr11gal4_fruFLP_uas_stop_mcd8gfp male 3
	dpr 11 male brain 4	NA	NA							F6	4-7day_dpr11gal4_fruFLP_uas_stop_mcd8gfp male 4
	dpr 11 male brain 5	35	22							G5	4-7day_dpr11gal4_fruFLP_uas_stop_mcd8gfp male 5
	Averaged cell body counts	34.5	27
	Dividing by highest count	0.69	0.54
	dpr 11 male VNC 1			8	5	47	26	11	29	I9	4-7day_dpr11gal4_fruFLP_uas_stop_mcd8gfp male VNC
	dpr 11 male VNC 2			9	2	25	14	23	13	K2	4-7day_dpr11gal4_fruFLP_uas_stop_mcd8gfp male VNC 2
	dpr 11 male VNC 3			4	10	28	16	21	28	Q7	4-7day_dpr11gal4_fruFLP_uas_stop_mcd8gfp male VNC 3
	dpr 11 male VNC 4			NA	NA	34	15	22	25	J3	4-7day_dpr11gal4_fruFLP_uas_stop_mcd8gfp male VNC 4
	dpr 11 male VNC 5			3	2	19	1	5	19	E2	4-7day_dpr11gal4_fruFLP_uas_stop_mcd8gfp male VNC 5
	Averaged cell body counts			6	4.75	30.6	14.4	16.4	22.8
	Dividing by highest count			0.4	0.139706	0.651064	0.411429	0.529032	0.414545
	dpr 12 female brain 1	23	34							BS_B9	4-7day_dpr12gal4_fruFLP_uas_stop_mcd8gfp female 5
	dpr 12 female brain 2	20	25							BS_E8	4-7day_dpr12gal4_fruFLP_uas_stop_mcd8gfp female 4
	dpr 12 female brain 3	21	31							BS_S3	4-7day_dpr12gal4_fruFLP_uas_stop_mcd8gfp female
	dpr 12 female brain 4	14	27							BS_T5	4-7day_dpr12gal4_fruFLP_uas_stop_mcd8gfp female 2
	dpr 12 female brain 5	23	22							BS_T7	4-7day_dpr12gal4_fruFLP_uas_stop_mcd8gfp female 3
	Averaged cell body counts	20.2	27.8
	Dividing by highest count	0.404	0.556
	dpr 12 female VNC 1			0	2	28	20	7	28	BS_B6	4-7day_dpr12gal4_fruFLP_uas_stop_mcd8gfp female VNC 3
	dpr 12 female VNC 2			9	5	16	11	7	19	BS_C3	4-7day_dpr12gal4_fruFLP_uas_stop_mcd8gfp female VNC
	dpr 12 female VNC 3			14	16	20	13	6	29	BS_D7	4-7day_dpr12gal4_fruFLP_uas_stop_mcd8gfp female VNC 2
	dpr 12 female VNC 4			4	4	16	7	6	9	BS_N3	4-7day_dpr12gal4_fruFLP_uas_stop_mcd8gfp female VNC 5
	dpr 12 female VNC 5			9	11	18	11	11	27	BS_N6	4-7day_dpr12gal4_fruFLP_uas_stop_mcd8gfp female VNC 4
	Averaged cell body counts			7.2	7.6	19.6	12.4	7.4	22.4
	Dividing by highest count			0.48	0.223529	0.417021	0.354286	0.23871	0.407273
	dpr 12 male brain 1	21	27							BS_H2	4-7day_dpr12gal4_fruFLP_uas_stop_mcd8gfp male 5
	dpr 12 male brain 2	50	39							BS_P6	4-7day_dpr12gal4_fruFLP_uas_stop_mcd8gfp male v2
	dpr 12 male brain 3	39	27							BS_R5	4-7day_dpr12gal4_fruFLP_uas_stop_mcd8gfp male 3
	dpr 12 male brain 4	26	32							BS_S9	4-7day_dpr12gal4_fruFLP_uas_stop_mcd8gfp male 4
	dpr 12 male brain 5	36	35							BS_G3	4-7day_dpr12gal4_fruFLP_uas_stop_mcd8gfp male
	Averaged cell body counts	34.4	32
	Dividing by highest count	0.688	0.64
	dpr 12 male VNC 1			9	12	12	15	16	29	BS_H3	4-7day_dpr12gal4_fruFLP_uas_stop_mcd8gfp male VNC 6
	dpr 12 male VNC 2			12	24	19	29	14	55	BS_H4	4-7day_dpr12gal4_fruFLP_uas_stop_mcd8gfp male VNC 5
	dpr 12 male VNC 3			7	13	26	28	17	35	BS_K5	4-7day_dpr12gal4_fruFLP_uas_stop_mcd8gfp male VNC 4
	dpr 12 male VNC 4			NA	NA	NA	NA	NA	NA	BS_M4	4-7day_dpr12gal4_fruFLP_uas_stop_mcd8gfp male VNC 3
	dpr 12 male VNC 5			12	34	30	35	25	46	BS_N1	4-7day_dpr12gal4_fruFLP_uas_stop_mcd8gfp male VNC
	Averaged cell body counts			10	20.75	21.75	26.75	18	41.25
	Dividing by highest count			0.666667	0.610294	0.462766	0.764286	0.580645	0.75
	dpr 14 female brain 1	4	NA							C7	4-7daysDpr14GAL4_UASstopsmGDPmycstop_FruFLP female
	dpr 14 female brain 2	3	15							C9	4-7daysDpr14GAL4_UASstopsmGDPmycstop_FruFLP female 3
	dpr 14 female brain 3	1	5							L5	4-7daysDpr14GAL4_UASstopsmGDPmycstop_FruFLP female 4
	dpr 14 female brain 4	1	4							I6	4-7daysDpr14GAL4_UASstopsmGDPmycstop_FruFLP female 5
	dpr 14 female brain 5	1	7							O5	4-7daysDpr14GAL4_UASstopsmGDPmycstop_FruFLP female 6
	Averaged cell body counts	2	7.75
	Dividing by highest count	0.04	0.155
	dpr 14 female VNC 1			0	7	9	1	3	NA	I3	4-7daysDpr14GAL4_UASstopsmGDPmycstop_FruFLP female VNC
	dpr 14 female VNC 2			4	3	7	4	2	5	R4	4-7daysDpr14GAL4_UASstopsmGDPmycstop_FruFLP female VNC 2
	dpr 14 female VNC 3			3	4	14	6	6	6	G7	4-7daysDpr14GAL4_UASstopsmGDPmycstop_FruFLP female VNC 3
	dpr 14 female VNC 4			4	3	9	7	5	11	I1	4-7daysDpr14GAL4_UASstopsmGDPmycstop_FruFLP female VNC 4
	dpr 14 female VNC 5			4	0	10	4	6	3	F5	4-7daysDpr14GAL4_UASstopsmGDPmycstop_FruFLP female VNC 5
	Averaged cell body counts			3	3.4	9.8	4.4	4.4	6.25
	Dividing by highest count			0.2	0.1	0.208511	0.125714	0.141935	0.113636
	dpr 14 male brain 1	13	18							C3	4-7daysDpr14GAL4_UASstopsmGDPmycstop_FruFLP male 3
	dpr 14 male brain 2	5	19							G1	4-7daysDpr14GAL4_UASstopsmGDPmycstop_FruFLP male 4
	dpr 14 male brain 3	11	17							M7	4-7daysDpr14GAL4_UASstopsmGDPmycstop_FruFLP male 5
	dpr 14 male brain 4	5	4							C6	4-7daysDpr14GAL4_UASstopsmGDPmycstop_FruFLP male 6
	dpr 14 male brain 5	3	3							E5	4-7daysDpr14GAL4_UASstopsmGDPmycstop_FruFLP male 7
	Averaged cell body counts	7.4	12.2
	Dividing by highest count	0.148	0.244
	dpr 14 male VNC 1			1	3	21	4	1	6	A8	4-7daysDpr14GAL4_UASstopsmGDPmycstop_FruFLP male VNC
	dpr 14 male VNC 2			1	4	15	12	1	11	P6	4-7daysDpr14GAL4_UASstopsmGDPmycstop_FruFLP male VNC 2
	dpr 14 male VNC 3			5	0	26	11	10	14	J4	4-7daysDpr14GAL4_UASstopsmGDPmycstop_FruFLP male VNC 3
	dpr 14 male VNC 4			1	4	19	11	5	19	F7	4-7daysDpr14GAL4_UASstopsmGDPmycstop_FruFLP male VNC 4
	dpr 14 male VNC 5			3	1	13	0	12	16	E3	4-7daysDpr14GAL4_UASstopsmGDPmycstop_FruFLP male VNC 5
	Averaged cell body counts			2.2	2.4	18.8	7.6	5.8	13.2
	Dividing by highest count			0.146667	0.0705882	0.4	0.217143	0.187097	0.24
	dpr 15 female brain 1	NA	NA							O3	4-7day_dpr15gal4_fruFLP_uas_stop_mcd8gfp female
	dpr 15 female brain 2	NA	4							C1	4-7day_dpr15gal4_fruFLP_uas_stop_mcd8gfp female 2
	dpr 15 female brain 3	9	15							K5	4-7day_dpr15gal4_fruFLP_uas_stop_mcd8gfp female 3
	dpr 15 female brain 4	3	5							B5	4-7day_dpr15gal4_fruFLP_uas_stop_mcd8gfp female 4
	dpr 15 female brain 5	11	14							N1	4-7day_dpr15gal4_fruFLP_uas_stop_mcd8gfp female 5
	Averaged cell body counts	7.66667	9.5
	Dividing by highest count	0.153333	0.19
	dpr 15 female VNC 1			7	8	26	5	9	17	E6	4-7day_dpr15gal4_fruFLP_uas_stop_mcd8gfp female VNC
	dpr 15 female VNC 2			3	7	15	2	11	12	A3	4-7day_dpr15gal4_fruFLP_uas_stop_mcd8gfp female VNC 2
	dpr 15 female VNC 3			2	5	17	13	7	13	A9	4-7day_dpr15gal4_fruFLP_uas_stop_mcd8gfp female VNC 3
	dpr 15 female VNC 4			3	2	21	7	9	23	A6	4-7day_dpr15gal4_fruFLP_uas_stop_mcd8gfp female VNC 4
	dpr 15 female VNC 5			6	3	16	11	8	21	F8	4-7day_dpr15gal4_fruFLP_uas_stop_mcd8gfp female VNC 5
	Averaged cell body counts			4.2	5	19	7.6	8.8	17.2
	Dividing by highest count			0.28	0.147059	0.404255	0.217143	0.283871	0.312727
	dpr 15 male brain 1	27	20							I4	4-7day_dpr15gal4_fruFLP_uas_stop_mcd8gfp male
	dpr 15 male brain 2	16	11							G9	4-7day_dpr15gal4_fruFLP_uas_stop_mcd8gfp male 2
	dpr 15 male brain 3	18	19							R5	4-7day_dpr15gal4_fruFLP_uas_stop_mcd8gfp male 4
	dpr 15 male brain 4	26	19							O1	4-7day_dpr15gal4_fruFLP_uas_stop_mcd8gfp male 5
	dpr 15 male brain 5	14	18							B7	4-7day_dpr15gal4_fruFLP_uas_stop_mcd8gfp male 6
	Averaged cell body counts	20.2	17.4
	Dividing by highest count	0.404	0.348
	dpr 15 male VNC 1									N4	4-7day_dpr15gal4_fruFLP_uas_stop_mcd8gfp male VNC
	dpr 15 male VNC 2			2	2	26	13	24	22	J2	4-7day_dpr15gal4_fruFLP_uas_stop_mcd8gfp male VNC 2
	dpr 15 male VNC 3			2	15	29	11	16	31	P4	4-7day_dpr15gal4_fruFLP_uas_stop_mcd8gfp male VNC 3
	dpr 15 male VNC 4			1	16	22	9	16	25	J8	4-7day_dpr15gal4_fruFLP_uas_stop_mcd8gfp male VNC 4
	dpr 15 male VNC 5			0	0	29	21	6	23	O9	4-7day_dpr15gal4_fruFLP_uas_stop_mcd8gfp male VNC 5
	Averaged cell body counts			1.25	8.25	26.5	13.5	15.5	25.25
	Dividing by highest count			0.0833333	0.242647	0.56383	0.385714	0.5	0.459091
	dpr 16 female brain 1	28	29							BS_D4	4-7day_dpr16gal4_fruFLP_uas_stop_mcd8gfp female 3
	dpr 16 female brain 2	18	28							BS_K1	4-7day_dpr16gal4_fruFLP_uas_stop_mcd8gfp female 2
	dpr 16 female brain 3	13	20							BS_N8	4-7day_dpr16gal4_fruFLP_uas_stop_mcd8gfp female 6
	dpr 16 female brain 4	13	30							BS_J1	4-7day_dpr16gal4_fruFLP_uas_stop_mcd8gfp female 4 v2
	dpr 16 female brain 5	24	40							BS_F2	4-7day_dpr16gal4_fruFLP_uas_stop_mcd8gfp female
	Averaged cell body counts	19.2	29.4
	Dividing by highest count	0.384	0.588
	dpr 16 female VNC 1			6	2	17	9	8	22	BS_A2	4-7day_dpr16gal4_fruFLP_uas_stop_mcd8gfp female VNC 4
	dpr 16 female VNC 2			0	9	15	8	6	22	BS_G2	4-7day_dpr16gal4_fruFLP_uas_stop_mcd8gfp female VNC 5
	dpr 16 female VNC 3			7	11	18	5	10	16	BS_H6	4-7day_dpr16gal4_fruFLP_uas_stop_mcd8gfp female VNC 2
	dpr 16 female VNC 4			6	5	15	13	6	15	BS_M3	4-7day_dpr16gal4_fruFLP_uas_stop_mcd8gfp female VNC 3
	dpr 16 female VNC 5			5	3	5	2	6	21	BS_T6	4-7day_dpr16gal4_fruFLP_uas_stop_mcd8gfp female VNC
	Averaged cell body counts			4.8	6	14	7.4	7.2	19.2
	Dividing by highest count			0.32	0.176471	0.297872	0.211429	0.232258	0.349091
	dpr 16 male brain 1	21	30							BS_A9	4-7day_dpr16gal4_fruFLP_uas_stop_mcd8gfp male 2
	dpr 16 male brain 2	NA	NA							BS_K9	4-7day_dpr16gal4_fruFLP_uas_stop_mcd8gfp male 5
	dpr 16 male brain 3	26	5							BS_M8	4-7day_dpr16gal4_fruFLP_uas_stop_mcd8gfp male 3
	dpr 16 male brain 4	38	15							BS_N2	4-7day_dpr16gal4_fruFLP_uas_stop_mcd8gfp male
	dpr 16 male brain 5	13	26							BS_T1	4-7day_dpr16gal4_fruFLP_uas_stop_mcd8gfp male 4
	Averaged cell body counts	24.5	19
	Dividing by highest count	0.49	0.38
	dpr 16 male VNC 1			9	24	23	17	7	31	BS_D1	4-7day_dpr16gal4_fruFLP_uas_stop_mcd8gfp male VNC 4
	dpr 16 male VNC 2			7	16	15	11	11	17	BS_H9	4-7day_dpr16gal4_fruFLP_uas_stop_mcd8gfp male VNC 2
	dpr 16 male VNC 3			9	14	18	19	10	24	BS_K8	4-7day_dpr16gal4_fruFLP_uas_stop_mcd8gfp male VNC 3
	dpr 16 male VNC 4			0	12	20	18	13	33	BS_P2	4-7day_dpr16gal4_fruFLP_uas_stop_mcd8gfp male VNC 5
	dpr 16 male VNC 5			11	17	17	24	7	31	BS_S1	4-7day_dpr16gal4_fruFLP_uas_stop_mcd8gfp male VNC
	Averaged cell body counts			7.2	16.6	18.6	17.8	9.6	27.2
	Dividing by highest count			0.48	0.488235	0.395745	0.508571	0.309677	0.494545
	dpr 17 female brain 1	18	30							K3	4-7day_dpr17gal4_fruFLP_uas_stop_mcd8gfp female 2
	dpr 17 female brain 2	5	24							M9	4-7day_dpr17gal4_fruFLP_uas_stop_mcd8gfp female 3
	dpr 17 female brain 3	10	23							P9	4-7day_dpr17gal4_fruFLP_uas_stop_mcd8gfp female 4
	dpr 17 female brain 4	10	25							G2	4-7day_dpr17gal4_fruFLP_uas_stop_mcd8gfp female 5
	dpr 17 female brain 5	NA	17							B6	4-7day_dpr17gal4_fruFLP_uas_stop_mcd8gfp female 6
	Averaged cell body counts	10.75	23.8
	Dividing by highest count	0.215	0.476
	dpr 17 female VNC 1			3	4	18	9	4	12	A2	4-7day_dpr17gal4_fruFLP_uas_stop_mcd8gfp female VNC
	dpr 17 female VNC 2			5	5	12	6	10	11	L7	4-7day_dpr17gal4_fruFLP_uas_stop_mcd8gfp female VNC 2
	dpr 17 female VNC 3			6	2	19	7	7	11	Q1	4-7day_dpr17gal4_fruFLP_uas_stop_mcd8gfp female VNC 3
	dpr 17 female VNC 4			4	5	20	9	14	14	L3	4-7day_dpr17gal4_fruFLP_uas_stop_mcd8gfp female VNC 4
	dpr 17 female VNC 5			7	10	33	16	14	14	P7	4-7day_dpr17gal4_fruFLP_uas_stop_mcd8gfp female VNC 5
	Averaged cell body counts			5	5.2	20.4	9.4	9.8	12.4
	Dividing by highest count			0.333333	0.152941	0.434043	0.268571	0.316129	0.225455
	dpr 17 male brain 1	NA	NA							J6	4-7day_dpr17gal4_fruFLP_uas_stop_mcd8gfp male
	dpr 17 male brain 2	3	18							E7	4-7day_dpr17gal4_fruFLP_uas_stop_mcd8gfp male 2
	dpr 17 male brain 3	6	20							D8	4-7day_dpr17gal4_fruFLP_uas_stop_mcd8gfp male 3
	dpr 17 male brain 4	15	2							R7	4-7day_dpr17gal4_fruFLP_uas_stop_mcd8gfp male 4
	dpr 17 male brain 5	6	20							R2	4-7day_dpr17gal4_fruFLP_uas_stop_mcd8gfp male 5
	Averaged cell body counts	7.5	15
	Dividing by highest count	0.15	0.3
	dpr 17 male VNC 1			6	1	5	3	5	8	L6	4-7day_dpr17gal4_fruFLP_uas_stop_mcd8gfp male VNC
	dpr 17 male VNC 2									R6	4-7day_dpr17gal4_fruFLP_uas_stop_mcd8gfp male VNC 2
	dpr 17 male VNC 3			7	7	15	12	7	21	N8	4-7day_dpr17gal4_fruFLP_uas_stop_mcd8gfp male VNC 3
	dpr 17 male VNC 4			4	8	7	7	9	13	K4	4-7day_dpr17gal4_fruFLP_uas_stop_mcd8gfp male VNC 4
	dpr 17 male VNC 5			3	6	19	6	8	15	D4	4-7day_dpr17gal4_fruFLP_uas_stop_mcd8gfp male VNC 5
	Averaged cell body counts			5	5.5	11.5	7	7.25	14.25
	Dividing by highest count			0.333333	0.161765	0.244681	0.2	0.233871	0.259091
	dpr 18 female brain 1	16	21							BS_J9	4-7daysDpr18GAL4_UASstopsmGDPmycstop_FruFLP female
	dpr 18 female brain 2	13	14							BS_K7	4-7daysDpr18GAL4_UASstopsmGDPmycstop_FruFLP female 5
	dpr 18 female brain 3	13	9							BS_Q2	4-7daysDpr18GAL4_UASstopsmGDPmycstop_FruFLP female 2
	dpr 18 female brain 4	17	9							BS_C8	4-7daysDpr18GAL4_UASstopsmGDPmycstop_FruFLP female 4
	dpr 18 female brain 5	16	13							BS_G7	4-7daysDpr18GAL4_UASstopsmGDPmycstop_FruFLP female 3
	Averaged cell body counts	15	13.2
	Dividing by highest count	0.3	0.264
	dpr 18 female VNC 1			0	2	9	6	3	11	BS_A1	4-7daysDpr18GAL4_UASstopsmGDPmycstop_FruFLP female VNC
	dpr 18 female VNC 2			6	9	11	5	6	14	BS_A4	4-7daysDpr18GAL4_UASstopsmGDPmycstop_FruFLP female VNC 4
	dpr 18 female VNC 3			7	2	9	7	13	16	BS_O7	4-7daysDpr18GAL4_UASstopsmGDPmycstop_FruFLP female VNC 5
	dpr 18 female VNC 4			5	6	12	8	12	14	BS_P9	4-7daysDpr18GAL4_UASstopsmGDPmycstop_FruFLP female VNC 3
	dpr 18 female VNC 5			6	3	15	10	7	14	BS_Q1	4-7daysDpr18GAL4_UASstopsmGDPmycstop_FruFLP female VNC 2
	Averaged cell body counts			4.8	4.4	11.2	7.2	8.2	13.8
	Dividing by highest count			0.32	0.129412	0.238298	0.205714	0.264516	0.250909
	dpr 18 male brain 1	18	21							BS_D9	4-7daysDpr18GAL4_UASstopsmGDPmycstop_FruFLP male 4
	dpr 18 male brain 2	16	20							BS_M1	4-7daysDpr18GAL4_UASstopsmGDPmycstop_FruFLP male 5
	dpr 18 male brain 3	24	25							BS_M2	4-7daysDpr18GAL4_UASstopsmGDPmycstop_FruFLP male 6
	dpr 18 male brain 4	24	29							BS_O2	4-7daysDpr18GAL4_UASstopsmGDPmycstop_FruFLP male 3
	dpr 18 male brain 5	4	32							BS_S8	4-7daysDpr18GAL4_UASstopsmGDPmycstop_FruFLP male
	Averaged cell body counts	17.2	25.4
	Dividing by highest count	0.344	0.508
	dpr 18 male VNC 1			6	16	21	12	8	23	BS_C1	4-7daysDpr18GAL4_UASstopsmGDPmycstop_FruFLP male VNC 3
	dpr 18 male VNC 2			4	17	18	12	6	16	BS_E6	4-7daysDpr18GAL4_UASstopsmGDPmycstop_FruFLP male VNC 4
	dpr 18 male VNC 3			8	11	10	12	16	12	BS_E7	4-7daysDpr18GAL4_UASstopsmGDPmycstop_FruFLP male VNC 5
	dpr 18 male VNC 4			8	4	11	7	7	18	BS_O6	4-7daysDpr18GAL4_UASstopsmGDPmycstop_FruFLP male VNC 2
	dpr 18 male VNC 5			5	13	24	12	12	31	BS_P1	4-7daysDpr18GAL4_UASstopsmGDPmycstop_FruFLP male VNC
	Averaged cell body counts			6.2	12.2	16.8	11	9.8	20
	Dividing by highest count			0.413333	0.358824	0.357447	0.314286	0.316129	0.363636

## Sheet: Full Data Set
	Genotype/Sex	Anterior Midbrain (cell body count)	mcAL (cell body count)	mAL neuron (present/absent)	Tritocerebral Loop (present/ absent)	Lateral protocerebral complex: Arch (present/ absent)	Lateral protocerebral complex: Ring (present/ absent)	Lateral protocerebral complex: Junction (present/ absent)	Lateral protocerebral complex: Crescent (present/ absent)	Antennal Lobe Glomeruli expression in DA1 (present/ absent)	Antennal Lobe Glomeruli expression in VA1v (present/ absent)	Mushroom body expression (present/ absent)	Top (cell body count)	T1 (cell body count)	T2 wing (cell body count)	T2 (cell body count)	T3 (cell body count)	Abdominal ganglion (cell body count)	Midline Crossing (present/ absent)	Mesothoracic Triangle Neurons (present/ absent)
	DIP-alpha female	0.128	0.22	0	0.4	0.8	0	0	0	0	0	0	0.0266667	0.00588235	0.0595745	0.08	0.0903226	0.0509091	0.4	0.2
	DIP-alpha male	0.004	0.264	0	0.2	0.2	0	0	0	0	0	0	0	0.0352941	0.0510638	0.04	0.0451613	0.0727273	0	0
	DIP-beta female	0.152	0.248	0	0	1	1	1	0.6	0	0	0	0.106667	0.0176471	0.242553	0.0342857	0.0193548	0.185455	0	0
	DIP-beta male	0.128	0.156	0	0.6	1	1	1	0.8	0	0	0	0.1778	0.0735294	0.212766	0.107143	0.0806452	0.260545	0.75	0.5
	DIP-delta female	0.036	0	0	0	0	0	0	0	0	0	0	0.106667	0.0176471	0.093617	0.165714	0.0580645	0.12	0.25	0.4
	DIP-delta male	0.028	0	0	0	0	0	0	0	0	0	0	0.04	0	0.191489	0.428571	0.16129	0.261818	0.8	0.2
	DIP-epsilon female	0.048	0.26	0	0	1	1	1	0.2	0	0	0	0.146667	0	0.238298	0.0571429	0.103226	0.154545	0.5	0.5
	DIP-epsilon male	0.024	0.208	0	0.2	1	1	1	1	0.2	0	0	0.0133333	0.0117647	0.225532	0.0857143	0.083871	0.186364	0.25	0
	DIP-eta female	0.06	0.02	0.2	0	1	0.8	0.8	0.6	1	1	0	0.253333	0.0352941	0.161702	0.0228571	0.0516129	0.0363636	0.6	0.4
	DIP-eta male	0.336	0.012	0.8	1	1	1	1	1	1	1	0	0.32	0.0352941	0.306383	0.131429	0.154839	0.04	0.8	0.8
	DIP-gamma female	0.132	0.316	0	0	1	1	0.8	0.8	0	0	1	0.333333	0.0176471	0.102128	0.131429	0.212903	0.265455	0.666667	0.75
	DIP-gamma male	0.364	0.392	0.2	1	1	1	1	0.8	0	0	1	0.316667	0.00735294	0.0851064	0.142857	0.0483871	0.240909	0.33	0.5
	DIP-theta female	0.252	0.24	0.2	0	1	1	1	1	1	0	0	0.16	0.0294118	0.208511	0.0685714	0.0967742	0.130909	0	0
	DIP-theta male	0.132	0.245	1	1	1	1	1	1	0	0	0	0.173333	0.123529	0.217021	0.205714	0.129032	0.294545	1	1
	DIP-zeta female	0.08	0.144	0	0.2	1	1	1	0.6	0.2	0	0	0.0166667	0	0.12234	0.0357143	0	0.0909091	0.33	0
	DIP-zeta male	0.068	0.06	0.2	0.8	1	1	1	0.25	0	0	0	0.0666667	0.0470588	0.0680851	0.0114286	0.0322581	0.0545455	0.5	0.25
	dpr-1 female	0.316	0.432	0	0.2	1	1	1	0.8	1	1	0	0.213333	0.0220588	0.340426	0.291429	0.258065	0.243636	0	0
	dpr-1 male	0.46	0.686	0	1	1	1	1	1	1	1	0	0.333333	0.0808824	0.580851	0.271429	0.298387	0.581818	1	1
	dpr-2 female	0.376	0.504	0.4	0.6	1	1	1	1	1	1	0	0.373333	0.117647	0.259574	0.228571	0.16129	0.309091	0	0
	dpr-2 male	0.528	0.828	0.2	1	1	1	1	1	1	1	0	0.44	0.329412	0.523404	0.697143	0.387097	0.592727	0.8	0.8
	dpr-3 female	0.41	0.41	0	0	1	1	1	0.8	1	1	0	0.493333	0.0882353	0.251064	0.171429	0.264516	0.258182	0	0
	dpr-3 male	0.22	0.352	0	0.8	1	1	1	1	0.2	0.2	0	0.426667	0.154412	0.335106	0.405714	0.33871	0.321212	1	0.4
	dpr-4 female	0.236	0.324	0	0.6	1	0.6	0.4	0.4	1	1	1	0.3	0.155882	0.303191	0.278571	0.306452	0.254545	0.4	0.2
	dpr-4 male	0.248	0.38	0.4	1	1	1	1	1	0.8	0.8	1	0.44	0.323529	0.417021	0.291429	0.393548	0.363636	0.8	1
	dpr-5 female	0.34	0.352	0	0.4	1	0.8	1	0.8	1	0	1	0.373333	0.158824	0.382979	0.245714	0.283871	0.356364	0	0
	dpr-5 male	0.34	0.432	0.2	0.8	1	1	1	1	1	0	1	0.306667	0.447059	0.53617	0.748571	0.419355	0.607273	1	1
	dpr-6 female	0.256	0.224	0	1	1	1	1	1	0	0	0	0.373333	0.282353	0.289362	0.245714	0.154839	0.304545	0	0
	dpr-6 male	0.656	0.476	1	1	1	1	1	1	0	0	0	0.4	0.311765	0.310638	0.497143	0.277419	0.447273	0.6	0.8
	dpr-8 female	0.304	0.444	0	0	1	1	1	0.6	1	1	1	0.333333	0.129412	0.519149	0.228571	0.354839	0.286364	0	0.2
	dpr-8 male	0.256	0.336	0.2	1	1	1	1	1	0.2	0	1	0.146667	0.2	0.540426	0.428571	0.354839	0.407273	1	0.8
	dpr-9 female	0.52	0.684	0	0.8	1	1	1	1	1	0.8	0.8	0.466667	0.188235	0.4	0.257143	0.251613	0.349091	0	0
	dpr-9 male	0.552	0.504	0.6	1	1	0.8	1	0.8	1	0.4	0.6	0.4	0.235294	0.387234	0.251429	0.322581	0.501818	0.8	0.6
	dpr-10 female	0.14	0.228	0	0.2	1	1	0.8	0.2	1	0.2	1	0.293333	0.188235	0.365957	0.257143	0.370968	0.395455	0.2	0
	dpr-10 male	0.312	0.192	0	1	1	1	1	1	0	0	1	0.4	0.132353	0.351064	0.564286	0.397742	0.436364	1	1
	dpr-11 female	0.58	0.386667	0	0	1	1	1	1	0.8	1	0	0.346667	0.0647059	0.357447	0.285714	0.277419	0.247273	0	0
	dpr-11 male	0.69	0.54	0.6	1	1	1	1	1	1	1	0	0.4	0.139706	0.651064	0.411429	0.529032	0.414545	0.75	0.75
	dpr-12 female	0.404	0.556	0	0.4	1	0.8	1	0.8	1	1	1	0.48	0.223529	0.417021	0.354286	0.23871	0.407273	0	0
	dpr-12 male	0.688	0.64	0.8	1	1	1	1	1	0.8	0.2	1	0.666667	0.610294	0.462766	0.764286	0.580645	0.75	0.8	1
	dpr-14 female	0.04	0.155	0	0	1	0.8	0.4	0	0.8	0	1	0.2	0.1	0.208511	0.125714	0.141935	0.113636	0	0
	dpr-14 male	0.148	0.244	0.2	1	1	0.4	0.6	0.4	0.2	0.2	1	0.146667	0.0705882	0.4	0.217143	0.187097	0.24	0.8	0.8
	dpr-15 female	0.153333	0.19	0	0	1	1	1	0.75	0.6	0	0	0.28	0.147059	0.404255	0.217143	0.283871	0.312727	0.4	0.4
	dpr-15 male	0.404	0.348	0.8	1	1	1	1	0.8	0.4	0	0	0.0833333	0.242647	0.56383	0.385714	0.5	0.459091	0.8	1
	dpr-16 female	0.384	0.588	0	0.6	1	1	1	1	0	0	0	0.32	0.176471	0.297872	0.211429	0.232258	0.349091	0.2	0.4
	dpr-16 male	0.49	0.38	0.8	1	1	1	1	1	0	0	0	0.48	0.488235	0.395745	0.508571	0.309677	0.494545	0.6	1
	dpr-17 female	0.215	0.476	0	0	1	1	0.8	1	0.8	0	0	0.333333	0.152941	0.434043	0.268571	0.316129	0.225455	0	0
	dpr-17 male	0.15	0.3	0	1	1	1	1	1	0	0	0	0.333333	0.161765	0.244681	0.2	0.233871	0.259091	0.4	1
	dpr-18 female	0.3	0.264	0.2	0.4	0.8	1	1	1	0	0	0	0.32	0.129412	0.238298	0.205714	0.264516	0.250909	0	0
	dpr-18 male	0.344	0.508	0.8	1	1	1	1	1	0.2	0	0	0.413333	0.358824	0.357447	0.314286	0.316129	0.363636	0.4	0.6

## Sheet: Male Only
	Genotype/Sex	Mushroom body expression (present/ absent)	Lateral protocerebral complex: Arch (present/ absent)	Lateral protocerebral complex: Ring (present/ absent)	Lateral protocerebral complex: Junction (present/ absent)	Lateral protocerebral complex: Crescent (present/ absent)	Antennal Lobe Glomeruli expression in DA1 (present/ absent)	Antennal Lobe Glomeruli expression in VA1v (present/ absent)	Tritocerebral Loop (present/ absent)	Midline Crossing (present/ absent)	Mesothoracic Triangle Neurons (present/ absent)	Anterior Midbrain (cell body count)	mcAL (cell body count)	Top (cell body count)	T1 (cell body count)	T2 wing (cell body count)	T2 (cell body count)	T3 (cell body count)	Abdominal Ganglion (cell body count)
	DIP-alpha male	0	0.2	0	0	0	0	0	0.2	0	0	0.004	0.264	0	0.0352941	0.0510638	0.04	0.0451613	0.0727273
	DIP-beta male	0	1	1	1	0.8	0	0	0.6	0.75	0.5	0.128	0.156	0.1778	0.0735294	0.212766	0.107143	0.0806452	0.260545
	DIP-delta male	0	0	0	0	0	0	0	0	0.8	0.2	0.028	0	0.04	0	0.191489	0.428571	0.16129	0.261818
	DIP-epsilon male	0	1	1	1	1	0.2	0	0.2	0.25	0	0.024	0.208	0.0133333	0.0117647	0.225532	0.0857143	0.083871	0.186364
	DIP-eta male	0	1	1	1	1	1	1	1	0.8	0.8	0.336	0.012	0.32	0.0352941	0.306383	0.131429	0.154839	0.04
	DIP-gamma male	1	1	1	1	0.8	0	0	1	0.33	0.5	0.364	0.392	0.316667	0.00735294	0.0851064	0.142857	0.0483871	0.240909
	DIP-theta male	0	1	1	1	1	0	0	1	1	1	0.132	0.245	0.173333	0.123529	0.217021	0.205714	0.129032	0.294545
	DIP-zeta male	0	1	1	1	0.25	0	0	0.8	0.5	0.25	0.068	0.06	0.0666667	0.0470588	0.0680851	0.0114286	0.0322581	0.0545455
	dpr-1 male	0	1	1	1	1	1	1	1	1	1	0.46	0.686	0.333333	0.0808824	0.580851	0.271429	0.298387	0.581818
	dpr-2 male	0	1	1	1	1	1	1	1	0.8	0.8	0.528	0.828	0.44	0.329412	0.523404	0.697143	0.387097	0.592727
	dpr-3 male	0	1	1	1	1	0.2	0.2	0.8	1	0.4	0.22	0.352	0.426667	0.154412	0.335106	0.405714	0.33871	0.321212
	dpr-4 male	1	1	1	1	1	0.8	0.8	1	0.8	1	0.248	0.38	0.44	0.323529	0.417021	0.291429	0.393548	0.363636
	dpr-5 male	1	1	1	1	1	1	0	0.8	1	1	0.34	0.432	0.306667	0.447059	0.53617	0.748571	0.419355	0.607273
	dpr-6 male	0	1	1	1	1	0	0	1	0.6	0.8	0.656	0.476	0.4	0.311765	0.310638	0.497143	0.277419	0.447273
	dpr-8 male	1	1	1	1	1	0.2	0	1	1	0.8	0.256	0.336	0.146667	0.2	0.540426	0.428571	0.354839	0.407273
	dpr-9 male	0.6	1	0.8	1	0.8	1	0.4	1	0.8	0.6	0.552	0.504	0.4	0.235294	0.387234	0.251429	0.322581	0.501818
	dpr-10 male	1	1	1	1	1	0	0	1	1	1	0.312	0.192	0.4	0.132353	0.351064	0.564286	0.397742	0.436364
	dpr-11 male	0	1	1	1	1	1	1	1	0.75	0.75	0.69	0.54	0.4	0.139706	0.651064	0.411429	0.529032	0.414545
	dpr-12 male	1	1	1	1	1	0.8	0.2	1	0.8	1	0.688	0.64	0.666667	0.610294	0.462766	0.764286	0.580645	0.75
	dpr-14 male	1	1	0.4	0.6	0.4	0.2	0.2	1	0.8	0.8	0.148	0.244	0.146667	0.0705882	0.4	0.217143	0.187097	0.24
	dpr-15 male	0	1	1	1	0.8	0.4	0	1	0.8	1	0.404	0.348	0.0833333	0.242647	0.56383	0.385714	0.5	0.459091
	dpr-16 male	0	1	1	1	1	0	0	1	0.6	1	0.49	0.38	0.48	0.488235	0.395745	0.508571	0.309677	0.494545
	dpr-17 male	0	1	1	1	1	0	0	1	0.4	1	0.15	0.3	0.333333	0.161765	0.244681	0.2	0.233871	0.259091
	dpr-18 male	0	1	1	1	1	0.2	0	1	0.4	0.6	0.344	0.508	0.413333	0.358824	0.357447	0.314286	0.316129	0.363636

## Sheet: Female Only
	Genotype/Sex	Mushroom body expression (present/ absent)	Lateral protocerebral complex: Arch (present/ absent)	Lateral protocerebral complex: Ring (present/ absent)	Lateral protocerebral complex: Junction (present/ absent)	Lateral protocerebral complex: Crescent (present/ absent)	Antennal Lobe Glomeruli expression in DA1 (present/ absent)	Antennal Lobe Glomeruli expression in VA1v (present/ absent)	Tritocerebral Loop (present/ absent)	Midline Crossing (present/ absent)	Mesothoracic Triangle Neurons (present/ absent)	Anterior Midbrain (cell body count)	mcAL (cell body count)	Top (cell body count)	T1 (cell body count)	T2 wing (cell body count)	T2 (cell body count)	T3 (cell body count)	Abdominal Ganglion (cell body count)
	DIP-alpha female	0	0.8	0	0	0	0	0	0.4	0.4	0.2	0.128	0.22	0.0266667	0.00588235	0.0595745	0.08	0.0903226	0.0509091
	DIP-beta female	0	1	1	1	0.6	0	0	0	0	0	0.152	0.248	0.106667	0.0176471	0.242553	0.0342857	0.0193548	0.185455
	DIP-delta female	0	0	0	0	0	0	0	0	0.25	0.4	0.036	0	0.106667	0.0176471	0.093617	0.165714	0.0580645	0.12
	DIP-epsilon female	0	1	1	1	0.2	0	0	0	0.5	0.5	0.048	0.26	0.146667	0	0.238298	0.0571429	0.103226	0.154545
	DIP-eta female	0	1	0.8	0.8	0.6	1	1	0	0.6	0.4	0.06	0.02	0.253333	0.0352941	0.161702	0.0228571	0.0516129	0.0363636
	DIP-gamma female	1	1	1	0.8	0.8	0	0	0	0.666667	0.75	0.132	0.316	0.333333	0.0176471	0.102128	0.131429	0.212903	0.265455
	DIP-theta female	0	1	1	1	1	1	0	0	0	0	0.252	0.24	0.16	0.0294118	0.208511	0.0685714	0.0967742	0.130909
	DIP-zeta female	0	1	1	1	0.6	0.2	0	0.2	0.33	0	0.08	0.144	0.0166667	0	0.12234	0.0357143	0	0.0909091
	dpr-1 female	0	1	1	1	0.8	1	1	0.2	0	0	0.316	0.432	0.213333	0.0220588	0.340426	0.291429	0.258065	0.243636
	dpr-2 female	0	1	1	1	1	1	1	0.6	0	0	0.376	0.504	0.373333	0.117647	0.259574	0.228571	0.16129	0.309091
	dpr-3 female	0	1	1	1	0.8	1	1	0	0	0	0.41	0.41	0.493333	0.0882353	0.251064	0.171429	0.264516	0.258182
	dpr-4 female	1	1	0.6	0.4	0.4	1	1	0.6	0.4	0.2	0.236	0.324	0.3	0.155882	0.303191	0.278571	0.306452	0.254545
	dpr-5 female	1	1	0.8	1	0.8	1	0	0.4	0	0	0.34	0.352	0.373333	0.158824	0.382979	0.245714	0.283871	0.356364
	dpr-6 female	0	1	1	1	1	0	0	1	0	0	0.256	0.224	0.373333	0.282353	0.289362	0.245714	0.154839	0.304545
	dpr-8 female	1	1	1	1	0.6	1	1	0	0	0.2	0.304	0.444	0.333333	0.129412	0.519149	0.228571	0.354839	0.286364
	dpr-9 female	0.8	1	1	1	1	1	0.8	0.8	0	0	0.52	0.684	0.466667	0.188235	0.4	0.257143	0.251613	0.349091
	dpr-10 female	1	1	1	0.8	0.2	1	0.2	0.2	0.2	0	0.14	0.228	0.293333	0.188235	0.365957	0.257143	0.370968	0.395455
	dpr-11 female	0	1	1	1	1	0.8	1	0	0	0	0.58	0.386667	0.346667	0.0647059	0.357447	0.285714	0.277419	0.247273
	dpr-12 female	1	1	0.8	1	0.8	1	1	0.4	0	0	0.404	0.556	0.48	0.223529	0.417021	0.354286	0.23871	0.407273
	dpr-14 female	1	1	0.8	0.4	0	0.8	0	0	0	0	0.04	0.155	0.2	0.1	0.208511	0.125714	0.141935	0.113636
	dpr-15 female	0	1	1	1	0.75	0.6	0	0	0.4	0.4	0.153333	0.19	0.28	0.147059	0.404255	0.217143	0.283871	0.312727
	dpr-16 female	0	1	1	1	1	0	0	0.6	0.2	0.4	0.384	0.588	0.32	0.176471	0.297872	0.211429	0.232258	0.349091
	dpr-17 female	0	1	1	0.8	1	0.8	0	0	0	0	0.215	0.476	0.333333	0.152941	0.434043	0.268571	0.316129	0.225455
	dpr-18 female	0	0.8	1	1	1	0	0	0.4	0	0	0.3	0.264	0.32	0.129412	0.238298	0.205714	0.264516	0.250909

## Sheet: Additional_Heatmaps
																		Full data set that is color-coded using the color scale feature in excel conditional formatting--data from full data set tab
																		For a feature to be considered present "consistently" in the text, there is a score value of 0.5 or greater in the full data table.
																		MALE DATA
																		Genotype/Sex	Mushroom body expression (present/ absent)	Lateral protocerebral complex: Arch (present/ absent)	Lateral protocerebral complex: Ring (present/ absent)	Lateral protocerebral complex: Junction (present/ absent)	Lateral protocerebral complex: Crescent (present/ absent)	Antennal lobe glomeruli expression in DA1	Antennal Lobe Glomeruli expression in VA1v (present/ absent)	Tritocerebral Loop (present/ absent)	Midline Crossing (present/ absent)	Mesothoracic Triangle Neurons (present/ absent)	Anterior Midbrain (cell body count)	mcAL (cell body count)	Top (cell body count)	T1 (cell body count)	T2 wing (cell body count)	T2 (cell body count)	T3 (cell body count)	Abdominal Ganglion (cell body count)
																		DIP-alpha male	0	0.2	0	0	0	0	0	0.2	0	0	0.004	0.264	0	0.0352941	0.0510638	0.04	0.0451613	0.0727273
																		DIP-beta male	0	1	1	1	0.8	0	0	0.6	0.75	0.5	0.128	0.156	0.1778	0.0735294	0.212766	0.107143	0.0806452	0.260545
																		DIP-delta male	0	0	0	0	0	0	0	0	0.8	0.2	0.028	0	0.04	0	0.191489	0.428571	0.16129	0.261818
																		DIP-epsilon male	0	1	1	1	1	0.2	0	0.2	0.25	0	0.024	0.208	0.0133333	0.0117647	0.225532	0.0857143	0.083871	0.186364
																		DIP-eta male	0	1	1	1	1	1	1	1	0.8	0.8	0.336	0.012	0.32	0.0352941	0.306383	0.131429	0.154839	0.04
																		DIP-gamma male	1	1	1	1	0.8	0	0	1	0.33	0.5	0.364	0.392	0.316667	0.00735294	0.0851064	0.142857	0.0483871	0.240909
																		DIP-theta male	0	1	1	1	1	0	0	1	1	1	0.132	0.245	0.173333	0.123529	0.217021	0.205714	0.129032	0.294545
																		DIP-zeta male	0	1	1	1	0.25	0	0	0.8	0.5	0.25	0.068	0.06	0.0666667	0.0470588	0.0680851	0.0114286	0.0322581	0.0545455
																		dpr-1 male	0	1	1	1	1	1	1	1	1	1	0.46	0.686	0.333333	0.0808824	0.580851	0.271429	0.298387	0.581818
																		dpr-2 male	0	1	1	1	1	1	1	1	0.8	0.8	0.528	0.828	0.44	0.329412	0.523404	0.697143	0.387097	0.592727
																		dpr-3 male	0	1	1	1	1	0.2	0.2	0.8	1	0.4	0.22	0.352	0.426667	0.154412	0.335106	0.405714	0.33871	0.321212
																		dpr-4 male	1	1	1	1	1	0.8	0.8	1	0.8	1	0.248	0.38	0.44	0.323529	0.417021	0.291429	0.393548	0.363636
																		dpr-5 male	1	1	1	1	1	1	0	0.8	1	1	0.34	0.432	0.306667	0.447059	0.53617	0.748571	0.419355	0.607273
																		dpr-6 male	0	1	1	1	1	0	0	1	0.6	0.8	0.656	0.476	0.4	0.311765	0.310638	0.497143	0.277419	0.447273
																		dpr-8 male	1	1	1	1	1	0.2	0	1	1	0.8	0.256	0.336	0.146667	0.2	0.540426	0.428571	0.354839	0.407273
																		dpr-9 male	0.6	1	0.8	1	0.8	1	0.4	1	0.8	0.6	0.552	0.504	0.4	0.235294	0.387234	0.251429	0.322581	0.501818
																		dpr-10 male	1	1	1	1	1	0	0	1	1	1	0.312	0.192	0.4	0.132353	0.351064	0.564286	0.397742	0.436364
																		dpr-11 male	0	1	1	1	1	1	1	1	0.75	0.75	0.69	0.54	0.4	0.139706	0.651064	0.411429	0.529032	0.414545
																		dpr-12 male	1	1	1	1	1	0.8	0.2	1	0.8	1	0.688	0.64	0.666667	0.610294	0.462766	0.764286	0.580645	0.75
																		dpr-14 male	1	1	0.4	0.6	0.4	0.2	0.2	1	0.8	0.8	0.148	0.244	0.146667	0.0705882	0.4	0.217143	0.187097	0.24
																		dpr-15 male	0	1	1	1	0.8	0.4	0	1	0.8	1	0.404	0.348	0.0833333	0.242647	0.56383	0.385714	0.5	0.459091
																		dpr-16 male	0	1	1	1	1	0	0	1	0.6	1	0.49	0.38	0.48	0.488235	0.395745	0.508571	0.309677	0.494545
																		dpr-17 male	0	1	1	1	1	0	0	1	0.4	1	0.15	0.3	0.333333	0.161765	0.244681	0.2	0.233871	0.259091
																		dpr-18 male	0	1	1	1	1	0.2	0	1	0.4	0.6	0.344	0.508	0.413333	0.358824	0.357447	0.314286	0.316129	0.363636
																		FEMALE DATA
																		Genotype/Sex	Mushroom body expression (present/ absent)	Lateral protocerebral complex: Arch (present/ absent)	Lateral protocerebral complex: Ring (present/ absent)	Lateral protocerebral complex: Junction (present/ absent)	Lateral protocerebral complex: Crescent (present/ absent)	Antennal lobe glomeruli expression in DA1	Antennal Lobe Glomeruli expression in VA1v (present/ absent)	Tritocerebral Loop (present/ absent)	Midline Crossing (present/ absent)	Mesothoracic Triangle Neurons (present/ absent)	Anterior Midbrain (cell body count)	mcAL (cell body count)	Top (cell body count)	T1 (cell body count)	T2 wing (cell body count)	T2 (cell body count)	T3 (cell body count)	Abdominal Ganglion (cell body count)
																		DIP-alpha female	0	0.8	0	0	0	0	0	0.4	0.4	0.2	0.128	0.22	0.0266667	0.00588235	0.0595745	0.08	0.0903226	0.0509091
																		DIP-beta female	0	1	1	1	0.6	0	0	0	0	0	0.152	0.248	0.106667	0.0176471	0.242553	0.0342857	0.0193548	0.185455
																		DIP-delta female	0	0	0	0	0	0	0	0	0.25	0.4	0.036	0	0.106667	0.0176471	0.093617	0.165714	0.0580645	0.12
																		DIP-epsilon female	0	1	1	1	0.2	0	0	0	0.5	0.5	0.048	0.26	0.146667	0	0.238298	0.0571429	0.103226	0.154545
																		DIP-eta female	0	1	0.8	0.8	0.6	1	1	0	0.6	0.4	0.06	0.02	0.253333	0.0352941	0.161702	0.0228571	0.0516129	0.0363636
																		DIP-gamma female	1	1	1	0.8	0.8	0	0	0	0.666667	0.75	0.132	0.316	0.333333	0.0176471	0.102128	0.131429	0.212903	0.265455
																		DIP-theta female	0	1	1	1	1	1	0	0	0	0	0.252	0.24	0.16	0.0294118	0.208511	0.0685714	0.0967742	0.130909
																		DIP-zeta female	0	1	1	1	0.6	0.2	0	0.2	0.33	0	0.08	0.144	0.0166667	0	0.12234	0.0357143	0	0.0909091
																		dpr-1 female	0	1	1	1	0.8	1	1	0.2	0	0	0.316	0.432	0.213333	0.0220588	0.340426	0.291429	0.258065	0.243636
																		dpr-2 female	0	1	1	1	1	1	1	0.6	0	0	0.376	0.504	0.373333	0.117647	0.259574	0.228571	0.16129	0.309091
																		dpr-3 female	0	1	1	1	0.8	1	1	0	0	0	0.41	0.41	0.493333	0.0882353	0.251064	0.171429	0.264516	0.258182
																		dpr-4 female	1	1	0.6	0.4	0.4	1	1	0.6	0.4	0.2	0.236	0.324	0.3	0.155882	0.303191	0.278571	0.306452	0.254545
																		dpr-5 female	1	1	0.8	1	0.8	1	0	0.4	0	0	0.34	0.352	0.373333	0.158824	0.382979	0.245714	0.283871	0.356364
																		dpr-6 female	0	1	1	1	1	0	0	1	0	0	0.256	0.224	0.373333	0.282353	0.289362	0.245714	0.154839	0.304545
																		dpr-8 female	1	1	1	1	0.6	1	1	0	0	0.2	0.304	0.444	0.333333	0.129412	0.519149	0.228571	0.354839	0.286364
																		dpr-9 female	0.8	1	1	1	1	1	0.8	0.8	0	0	0.52	0.684	0.466667	0.188235	0.4	0.257143	0.251613	0.349091
																		dpr-10 female	1	1	1	0.8	0.2	1	0.2	0.2	0.2	0	0.14	0.228	0.293333	0.188235	0.365957	0.257143	0.370968	0.395455
																		dpr-11 female	0	1	1	1	1	0.8	1	0	0	0	0.58	0.386667	0.346667	0.0647059	0.357447	0.285714	0.277419	0.247273
																		dpr-12 female	1	1	0.8	1	0.8	1	1	0.4	0	0	0.404	0.556	0.48	0.223529	0.417021	0.354286	0.23871	0.407273
																		dpr-14 female	1	1	0.8	0.4	0	0.8	0	0	0	0	0.04	0.155	0.2	0.1	0.208511	0.125714	0.141935	0.113636
																		dpr-15 female	0	1	1	1	0.75	0.6	0	0	0.4	0.4	0.153333	0.19	0.28	0.147059	0.404255	0.217143	0.283871	0.312727
																		dpr-16 female	0	1	1	1	1	0	0	0.6	0.2	0.4	0.384	0.588	0.32	0.176471	0.297872	0.211429	0.232258	0.349091
																		dpr-17 female	0	1	1	0.8	1	0.8	0	0	0	0	0.215	0.476	0.333333	0.152941	0.434043	0.268571	0.316129	0.225455
																		dpr-18 female	0	0.8	1	1	1	0	0	0.4	0	0	0.3	0.264	0.32	0.129412	0.238298	0.205714	0.264516	0.250909
																			Data separated by the phenotype scored with male and female data side by side
																	Genotype/Sex	Genotype/Sex	Mushroom body expression (present/ absent)	Mushroom body expression (present/ absent)		Lateral protocerebral complex: Arch (present/ absent)	Lateral protocerebral complex: Arch (present/ absent)		Lateral protocerebral complex: Ring (present/ absent)	Lateral protocerebral complex: Ring (present/ absent)		Lateral protocerebral complex: Junction (present/ absent)	Lateral protocerebral complex: Junction (present/ absent)		Lateral protocerebral complex: Crescent (present/ absent)	Lateral protocerebral complex: Crescent (present/ absent)		Antennal lobe glomeruli expression in DA1	Antennal lobe glomeruli expression in DA1
																	DIP-alpha male	DIP-alpha female	0	0		0.2	0.8		0	0		0	0		0	0		0	0
																	DIP-beta male	DIP-beta female	0	0		1	1		1	1		1	1		0.8	0.6		0	0
																	DIP-delta male	DIP-delta female	0	0		0	0		0	0		0	0		0	0		0	0
																	DIP-epsilon male	DIP-epsilon female	0	0		1	1		1	1		1	1		1	0.2		0.2	0
																	DIP-eta male	DIP-eta female	0	0		1	1		1	0.8		1	0.8		1	0.6		1	1
																	DIP-gamma male	DIP-gamma female	1	1		1	1		1	1		1	0.8		0.8	0.8		0	0
																	DIP-theta male	DIP-theta female	0	0		1	1		1	1		1	1		1	1		0	1
																	DIP-zeta male	DIP-zeta female	0	0		1	1		1	1		1	1		0.25	0.6		0	0.2
																	dpr-1 male	dpr-1 female	0	0		1	1		1	1		1	1		1	0.8		1	1
																	dpr-2 male	dpr-2 female	0	0		1	1		1	1		1	1		1	1		1	1
																	dpr-3 male	dpr-3 female	0	0		1	1		1	1		1	1		1	0.8		0.2	1
																	dpr-4 male	dpr-4 female	1	1		1	1		1	0.6		1	0.4		1	0.4		0.8	1
																	dpr-5 male	dpr-5 female	1	1		1	1		1	0.8		1	1		1	0.8		1	1
																	dpr-6 male	dpr-6 female	0	0		1	1		1	1		1	1		1	1		0	0
																	dpr-8 male	dpr-8 female	1	1		1	1		1	1		1	1		1	0.6		0.2	1
																	dpr-9 male	dpr-9 female	0.6	0.8		1	1		0.8	1		1	1		0.8	1		1	1
																	dpr-10 male	dpr-10 female	1	1		1	1		1	1		1	0.8		1	0.2		0	1
																	dpr-11 male	dpr-11 female	0	0		1	1		1	1		1	1		1	1		1	0.8
																	dpr-12 male	dpr-12 female	1	1		1	1		1	0.8		1	1		1	0.8		0.8	1
																	dpr-14 male	dpr-14 female	1	1		1	1		0.4	0.8		0.6	0.4		0.4	0		0.2	0.8
																	dpr-15 male	dpr-15 female	0	0		1	1		1	1		1	1		0.8	0.75		0.4	0.6
																	dpr-16 male	dpr-16 female	0	0		1	1		1	1		1	1		1	1		0	0
																	dpr-17 male	dpr-17 female	0	0		1	1		1	1		1	0.8		1	1		0	0.8
																	dpr-18 male	dpr-18 female	0	0		1	0.8		1	1		1	1		1	1		0.2	0
																	Genotype/Sex	Genotype/Sex	Antennal Lobe Glomeruli expression in VA1v (present/ absent)	Antennal Lobe Glomeruli expression in VA1v (present/ absent)		Tritocerebral Loop (present/ absent)	Tritocerebral Loop (present/ absent)		Midline Crossing (present/ absent)	Midline Crossing (present/ absent)		Mesothoracic Triangle Neurons (present/ absent)	Mesothoracic Triangle Neurons (present/ absent)		Anterior Midbrain (cell body count)	Anterior Midbrain (cell body count)		mcAL (cell body count)	mcAL (cell body count)
																	DIP-alpha male	DIP-alpha female	0	0		0.2	0.4		0	0.4		0	0.2		0.004	0.128		0.264	0.22
																	DIP-beta male	DIP-beta female	0	0		0.6	0		0.75	0		0.5	0		0.128	0.152		0.156	0.248
																	DIP-delta male	DIP-delta female	0	0		0	0		0.8	0.25		0.2	0.4		0.028	0.036		0	0
																	DIP-epsilon male	DIP-epsilon female	0	0		0.2	0		0.25	0.5		0	0.5		0.024	0.048		0.208	0.26
																	DIP-eta male	DIP-eta female	1	1		1	0		0.8	0.6		0.8	0.4		0.336	0.06		0.012	0.02
																	DIP-gamma male	DIP-gamma female	0	0		1	0		0.33	0.666667		0.5	0.75		0.364	0.132		0.392	0.316
																	DIP-theta male	DIP-theta female	0	0		1	0		1	0		1	0		0.132	0.252		0.245	0.24
																	DIP-zeta male	DIP-zeta female	0	0		0.8	0.2		0.5	0.33		0.25	0		0.068	0.08		0.06	0.144
																	dpr-1 male	dpr-1 female	1	1		1	0.2		1	0		1	0		0.46	0.316		0.686	0.432
																	dpr-2 male	dpr-2 female	1	1		1	0.6		0.8	0		0.8	0		0.528	0.376		0.828	0.504
																	dpr-3 male	dpr-3 female	0.2	1		0.8	0		1	0		0.4	0		0.22	0.41		0.352	0.41
																	dpr-4 male	dpr-4 female	0.8	1		1	0.6		0.8	0.4		1	0.2		0.248	0.236		0.38	0.324
																	dpr-5 male	dpr-5 female	0	0		0.8	0.4		1	0		1	0		0.34	0.34		0.432	0.352
																	dpr-6 male	dpr-6 female	0	0		1	1		0.6	0		0.8	0		0.656	0.256		0.476	0.224
																	dpr-8 male	dpr-8 female	0	1		1	0		1	0		0.8	0.2		0.256	0.304		0.336	0.444
																	dpr-9 male	dpr-9 female	0.4	0.8		1	0.8		0.8	0		0.6	0		0.552	0.52		0.504	0.684
																	dpr-10 male	dpr-10 female	0	0.2		1	0.2		1	0.2		1	0		0.312	0.14		0.192	0.228
																	dpr-11 male	dpr-11 female	1	1		1	0		0.75	0		0.75	0		0.69	0.58		0.54	0.386667
																	dpr-12 male	dpr-12 female	0.2	1		1	0.4		0.8	0		1	0		0.688	0.404		0.64	0.556
																	dpr-14 male	dpr-14 female	0.2	0		1	0		0.8	0		0.8	0		0.148	0.04		0.244	0.155
																	dpr-15 male	dpr-15 female	0	0		1	0		0.8	0.4		1	0.4		0.404	0.153333		0.348	0.19
																	dpr-16 male	dpr-16 female	0	0		1	0.6		0.6	0.2		1	0.4		0.49	0.384		0.38	0.588
																	dpr-17 male	dpr-17 female	0	0		1	0		0.4	0		1	0		0.15	0.215		0.3	0.476
																	dpr-18 male	dpr-18 female	0	0		1	0.4		0.4	0		0.6	0		0.344	0.3		0.508	0.264
																	Genotype/Sex	Genotype/Sex	Top (cell body count)	Top (cell body count)		T1 (cell body count)	T1 (cell body count)		T2 wing (cell body count)	T2 wing (cell body count)		T2 (cell body count)	T2 (cell body count)		T3 (cell body count)	T3 (cell body count)		Abdominal Ganglion (cell body count)	Abdominal Ganglion (cell body count)
																	DIP-alpha male	DIP-alpha female	0	0.0266667		0.0352941	0.00588235		0.0510638	0.0595745		0.04	0.08		0.0451613	0.0903226		0.0727273	0.0509091
																	DIP-beta male	DIP-beta female	0.1778	0.106667		0.0735294	0.0176471		0.212766	0.242553		0.107143	0.0342857		0.0806452	0.0193548		0.260545	0.185455
																	DIP-delta male	DIP-delta female	0.04	0.106667		0	0.0176471		0.191489	0.093617		0.428571	0.165714		0.16129	0.0580645		0.261818	0.12
																	DIP-epsilon male	DIP-epsilon female	0.0133333	0.146667		0.0117647	0		0.225532	0.238298		0.0857143	0.0571429		0.083871	0.103226		0.186364	0.154545
																	DIP-eta male	DIP-eta female	0.32	0.253333		0.0352941	0.0352941		0.306383	0.161702		0.131429	0.0228571		0.154839	0.0516129		0.04	0.0363636
																	DIP-gamma male	DIP-gamma female	0.316667	0.333333		0.00735294	0.0176471		0.0851064	0.102128		0.142857	0.131429		0.0483871	0.212903		0.240909	0.265455
																	DIP-theta male	DIP-theta female	0.173333	0.16		0.123529	0.0294118		0.217021	0.208511		0.205714	0.0685714		0.129032	0.0967742		0.294545	0.130909
																	DIP-zeta male	DIP-zeta female	0.0666667	0.0166667		0.0470588	0		0.0680851	0.12234		0.0114286	0.0357143		0.0322581	0		0.0545455	0.0909091
																	dpr-1 male	dpr-1 female	0.333333	0.213333		0.0808824	0.0220588		0.580851	0.340426		0.271429	0.291429		0.298387	0.258065		0.581818	0.243636
																	dpr-2 male	dpr-2 female	0.44	0.373333		0.329412	0.117647		0.523404	0.259574		0.697143	0.228571		0.387097	0.16129		0.592727	0.309091
																	dpr-3 male	dpr-3 female	0.426667	0.493333		0.154412	0.0882353		0.335106	0.251064		0.405714	0.171429		0.33871	0.264516		0.321212	0.258182
																	dpr-4 male	dpr-4 female	0.44	0.3		0.323529	0.155882		0.417021	0.303191		0.291429	0.278571		0.393548	0.306452		0.363636	0.254545
																	dpr-5 male	dpr-5 female	0.306667	0.373333		0.447059	0.158824		0.53617	0.382979		0.748571	0.245714		0.419355	0.283871		0.607273	0.356364
																	dpr-6 male	dpr-6 female	0.4	0.373333		0.311765	0.282353		0.310638	0.289362		0.497143	0.245714		0.277419	0.154839		0.447273	0.304545
																	dpr-8 male	dpr-8 female	0.146667	0.333333		0.2	0.129412		0.540426	0.519149		0.428571	0.228571		0.354839	0.354839		0.407273	0.286364
																	dpr-9 male	dpr-9 female	0.4	0.466667		0.235294	0.188235		0.387234	0.4		0.251429	0.257143		0.322581	0.251613		0.501818	0.349091
																	dpr-10 male	dpr-10 female	0.4	0.293333		0.132353	0.188235		0.351064	0.365957		0.564286	0.257143		0.397742	0.370968		0.436364	0.395455
																	dpr-11 male	dpr-11 female	0.4	0.346667		0.139706	0.0647059		0.651064	0.357447		0.411429	0.285714		0.529032	0.277419		0.414545	0.247273
																	dpr-12 male	dpr-12 female	0.666667	0.48		0.610294	0.223529		0.462766	0.417021		0.764286	0.354286		0.580645	0.23871		0.75	0.407273
																	dpr-14 male	dpr-14 female	0.146667	0.2		0.0705882	0.1		0.4	0.208511		0.217143	0.125714		0.187097	0.141935		0.24	0.113636
																	dpr-15 male	dpr-15 female	0.0833333	0.28		0.242647	0.147059		0.56383	0.404255		0.385714	0.217143		0.5	0.283871		0.459091	0.312727
																	dpr-16 male	dpr-16 female	0.48	0.32		0.488235	0.176471		0.395745	0.297872		0.508571	0.211429		0.309677	0.232258		0.494545	0.349091
																	dpr-17 male	dpr-17 female	0.333333	0.333333		0.161765	0.152941		0.244681	0.434043		0.2	0.268571		0.233871	0.316129		0.259091	0.225455
																	dpr-18 male	dpr-18 female	0.413333	0.32		0.358824	0.129412		0.357447	0.238298		0.314286	0.205714		0.316129	0.264516		0.363636	0.250909
																		Data for each Dpr/DIP with male and female rows together
																		Genotype/Sex	Mushroom body expression (present/ absent)	Lateral protocerebral complex: Arch (present/ absent)	Lateral protocerebral complex: Ring (present/ absent)	Lateral protocerebral complex: Junction (present/ absent)	Lateral protocerebral complex: Crescent (present/ absent)	Antennal lobe glomeruli expression in DA1	Antennal Lobe Glomeruli expression in VA1v (present/ absent)	Tritocerebral Loop (present/ absent)	Midline Crossing (present/ absent)	Mesothoracic Triangle Neurons (present/ absent)	Anterior Midbrain (cell body count)	mcAL (cell body count)	Top (cell body count)	T1 (cell body count)	T2 wing (cell body count)	T2 (cell body count)	T3 (cell body count)	Abdominal Ganglion (cell body count)
																		DIP-alpha male	0	0.2	0	0	0	0	0	0.2	0	0	0.004	0.264	0	0.0352941	0.0510638	0.04	0.0451613	0.0727273
																		DIP-alpha female	0	0.8	0	0	0	0	0	0.4	0.4	0.2	0.128	0.22	0.0266667	0.00588235	0.0595745	0.08	0.0903226	0.0509091
																		DIP-beta male	0	1	1	1	0.8	0	0	0.6	0.75	0.5	0.128	0.156	0.1778	0.0735294	0.212766	0.107143	0.0806452	0.260545
																		DIP-beta female	0	1	1	1	0.6	0	0	0	0	0	0.152	0.248	0.106667	0.0176471	0.242553	0.0342857	0.0193548	0.185455
																		DIP-delta male	0	0	0	0	0	0	0	0	0.8	0.2	0.028	0	0.04	0	0.191489	0.428571	0.16129	0.261818
																		DIP-delta female	0	0	0	0	0	0	0	0	0.25	0.4	0.036	0	0.106667	0.0176471	0.093617	0.165714	0.0580645	0.12
																		DIP-epsilon male	0	1	1	1	1	0.2	0	0.2	0.25	0	0.024	0.208	0.0133333	0.0117647	0.225532	0.0857143	0.083871	0.186364
																		DIP-epsilon female	0	1	1	1	0.2	0	0	0	0.5	0.5	0.048	0.26	0.146667	0	0.238298	0.0571429	0.103226	0.154545
																		DIP-eta male	0	1	1	1	1	1	1	1	0.8	0.8	0.336	0.012	0.32	0.0352941	0.306383	0.131429	0.154839	0.04
																		DIP-eta female	0	1	0.8	0.8	0.6	1	1	0	0.6	0.4	0.06	0.02	0.253333	0.0352941	0.161702	0.0228571	0.0516129	0.0363636
																		DIP-gamma male	1	1	1	1	0.8	0	0	1	0.33	0.5	0.364	0.392	0.316667	0.00735294	0.0851064	0.142857	0.0483871	0.240909
																		DIP-gamma female	1	1	1	0.8	0.8	0	0	0	0.666667	0.75	0.132	0.316	0.333333	0.0176471	0.102128	0.131429	0.212903	0.265455
																		DIP-theta male	0	1	1	1	1	0	0	1	1	1	0.132	0.245	0.173333	0.123529	0.217021	0.205714	0.129032	0.294545
																		DIP-theta female	0	1	1	1	1	1	0	0	0	0	0.252	0.24	0.16	0.0294118	0.208511	0.0685714	0.0967742	0.130909
																		DIP-zeta male	0	1	1	1	0.25	0	0	0.8	0.5	0.25	0.068	0.06	0.0666667	0.0470588	0.0680851	0.0114286	0.0322581	0.0545455
																		DIP-zeta female	0	1	1	1	0.6	0.2	0	0.2	0.33	0	0.08	0.144	0.0166667	0	0.12234	0.0357143	0	0.0909091
																		dpr-1 male	0	1	1	1	1	1	1	1	1	1	0.46	0.686	0.333333	0.0808824	0.580851	0.271429	0.298387	0.581818
																		dpr-1 female	0	1	1	1	0.8	1	1	0.2	0	0	0.316	0.432	0.213333	0.0220588	0.340426	0.291429	0.258065	0.243636
																		dpr-2 male	0	1	1	1	1	1	1	1	0.8	0.8	0.528	0.828	0.44	0.329412	0.523404	0.697143	0.387097	0.592727
																		dpr-2 female	0	1	1	1	1	1	1	0.6	0	0	0.376	0.504	0.373333	0.117647	0.259574	0.228571	0.16129	0.309091
																		dpr-3 male	0	1	1	1	1	0.2	0.2	0.8	1	0.4	0.22	0.352	0.426667	0.154412	0.335106	0.405714	0.33871	0.321212
																		dpr-3 female	0	1	1	1	0.8	1	1	0	0	0	0.41	0.41	0.493333	0.0882353	0.251064	0.171429	0.264516	0.258182
																		dpr-4 male	1	1	1	1	1	0.8	0.8	1	0.8	1	0.248	0.38	0.44	0.323529	0.417021	0.291429	0.393548	0.363636
																		dpr-4 female	1	1	0.6	0.4	0.4	1	1	0.6	0.4	0.2	0.236	0.324	0.3	0.155882	0.303191	0.278571	0.306452	0.254545
																		dpr-5 male	1	1	1	1	1	1	0	0.8	1	1	0.34	0.432	0.306667	0.447059	0.53617	0.748571	0.419355	0.607273
																		dpr-5 female	1	1	0.8	1	0.8	1	0	0.4	0	0	0.34	0.352	0.373333	0.158824	0.382979	0.245714	0.283871	0.356364
																		dpr-6 male	0	1	1	1	1	0	0	1	0.6	0.8	0.656	0.476	0.4	0.311765	0.310638	0.497143	0.277419	0.447273
																		dpr-6 female	0	1	1	1	1	0	0	1	0	0	0.256	0.224	0.373333	0.282353	0.289362	0.245714	0.154839	0.304545
																		dpr-8 male	1	1	1	1	1	0.2	0	1	1	0.8	0.256	0.336	0.146667	0.2	0.540426	0.428571	0.354839	0.407273
																		dpr-8 female	1	1	1	1	0.6	1	1	0	0	0.2	0.304	0.444	0.333333	0.129412	0.519149	0.228571	0.354839	0.286364
																		dpr-9 male	0.6	1	0.8	1	0.8	1	0.4	1	0.8	0.6	0.552	0.504	0.4	0.235294	0.387234	0.251429	0.322581	0.501818
																		dpr-9 female	0.8	1	1	1	1	1	0.8	0.8	0	0	0.52	0.684	0.466667	0.188235	0.4	0.257143	0.251613	0.349091
																		dpr-10 male	1	1	1	1	1	0	0	1	1	1	0.312	0.192	0.4	0.132353	0.351064	0.564286	0.397742	0.436364
																		dpr-10 female	1	1	1	0.8	0.2	1	0.2	0.2	0.2	0	0.14	0.228	0.293333	0.188235	0.365957	0.257143	0.370968	0.395455
																		dpr-11 male	0	1	1	1	1	1	1	1	0.75	0.75	0.69	0.54	0.4	0.139706	0.651064	0.411429	0.529032	0.414545
																		dpr-11 female	0	1	1	1	1	0.8	1	0	0	0	0.58	0.386667	0.346667	0.0647059	0.357447	0.285714	0.277419	0.247273
																		dpr-12 male	1	1	1	1	1	0.8	0.2	1	0.8	1	0.688	0.64	0.666667	0.610294	0.462766	0.764286	0.580645	0.75
																		dpr-12 female	1	1	0.8	1	0.8	1	1	0.4	0	0	0.404	0.556	0.48	0.223529	0.417021	0.354286	0.23871	0.407273
																		dpr-14 male	1	1	0.4	0.6	0.4	0.2	0.2	1	0.8	0.8	0.148	0.244	0.146667	0.0705882	0.4	0.217143	0.187097	0.24
																		dpr-14 female	1	1	0.8	0.4	0	0.8	0	0	0	0	0.04	0.155	0.2	0.1	0.208511	0.125714	0.141935	0.113636
																		dpr-15 male	0	1	1	1	0.8	0.4	0	1	0.8	1	0.404	0.348	0.0833333	0.242647	0.56383	0.385714	0.5	0.459091
																		dpr-15 female	0	1	1	1	0.75	0.6	0	0	0.4	0.4	0.153333	0.19	0.28	0.147059	0.404255	0.217143	0.283871	0.312727
																		dpr-16 male	0	1	1	1	1	0	0	1	0.6	1	0.49	0.38	0.48	0.488235	0.395745	0.508571	0.309677	0.494545
																		dpr-16 female	0	1	1	1	1	0	0	0.6	0.2	0.4	0.384	0.588	0.32	0.176471	0.297872	0.211429	0.232258	0.349091
																		dpr-17 male	0	1	1	1	1	0	0	1	0.4	1	0.15	0.3	0.333333	0.161765	0.244681	0.2	0.233871	0.259091
																		dpr-17 female	0	1	1	0.8	1	0.8	0	0	0	0	0.215	0.476	0.333333	0.152941	0.434043	0.268571	0.316129	0.225455
																		dpr-18 male	0	1	1	1	1	0.2	0	1	0.4	0.6	0.344	0.508	0.413333	0.358824	0.357447	0.314286	0.316129	0.363636
																		dpr-18 female	0	0.8	1	1	1	0	0	0.4	0	0	0.3	0.264	0.32	0.129412	0.238298	0.205714	0.264516	0.250909
