# Supplementary material for: Investigation of Drosophila fruitless neurons that express Dpr/DIP cell adhesion molecules
Source: eLife. 2021 Feb 22;10:e63101. doi: 10.7554/eLife.63101 (PMC7972454; doi:10.7554/eLife.63101)
Supplement: Source data 2. — Data tables of quantification of behavioral phenotypes. This is an excel data table with five sheets that contain all the behavioral data as follows: 1. READ ME: This first sheet is to explain the following four tabs. Please note that TNTQA1, as opposed to TNTQ is used in the following sheets. They both refer to the inactive form of TNT, but TNTQA1 is our lab nomenclature. 2. TrpA1 male-female courtship behavior data. 3. TrpA1 male alone courtship behavior data. 4. TNT courtship behavior data. 5. TNT DAM activity locomoter behavior data: This tab contains line crossing reads from Drosophila Activity Monitors (DAM). [file elife-63101-data2.xlsx]

## Sheet: 2. TrpA1 male-female
Noldus file name	Unblind	Coding notes	Behaviors	Total number	Total duration	Duration
TrpB3_K4	20_DIPeta_gal4_uas_stop_Trpa1_FruFLP11		Abdominal bending	1	0:00:03.294000	0:10:00.127000
TrpB3_G4	20_DIPeta_gal4_uas_stop_Trpa1_FruFLP15		Abdominal bending	1	0:00:04.155000	0:01:50.097000
TrpB5_G6	20_DIPTheta_gal4_uas_stop_Trpa1_FruFLP11		Abdominal bending	1	0:00:09.211000	0:01:43.151000
TrpB6_E8	20_DIPTheta_gal4_uas_stop_Trpa1_FruFLP13		Abdominal bending	2	0:00:03.276000	0:10:00.025000
TrpB5_D2	20_DIPTheta_gal4_uas_stop_Trpa1_FruFLP5		Abdominal bending	2	0:01:23.506000	0:09:14.491000
TrpB5_A5	20_DIPTheta_gal4_uas_stop_Trpa1_FruFLP7		Abdominal bending	2	0:00:26.841000	0:05:15.687000
TrpB3_K9	20_dpr1_gal4_uas_stop_Trpa1_FruFLP13		Abdominal bending	1	0:00:09.452000	0:02:16.539000
TrpB2_D7	20_dpr10_gal4_uas_stop_Trpa1_FruFLP7		Abdominal bending	5	10.97	494.1
TrpB2_E3	20_dpr10_gal4_uas_stop_Trpa1_FruFLP8		Abdominal bending	6	93.32	244.3
TrpB3_J5	20_dpr11_gal4_uas_stop_Trpa1_FruFLP11		Abdominal bending	3	0:00:37.357000	0:10:00.186000
TrpB1_L2	20_dpr11_gal4_uas_stop_Trpa1_FruFLP3		Abdominal bending	3	0:00:07.275000	0:09:11.532000
TrpB2_P2	20_dpr12_gal4_uas_stop_Trpa1_FruFLP7		Abdominal bending	1	19.32	600.02
TrpB5_B1	20_dpr2_gal4_uas_stop_Trpa1_FruFLP1		Abdominal bending	1	0:00:01.144000	0:02:37.642000
TrpB3_N9	20_dpr3_gal4_uas_stop_Trpa1_FruFLP13		Abdominal bending	2	0:00:24.735000	0:02:43.671000
TrpB3_J9	20_dpr3_gal4_uas_stop_Trpa1_FruFLP15		Abdominal bending	3	0:07:03.392000	0:10:00.030000
TrpB2_N7	20_dpr3_gal4_uas_stop_Trpa1_FruFLP8		Abdominal bending	6	17.29	600.12
TrpB7_J4	20_dpr4_gal4_uas_stop_Trpa1_FruFLP10		Abdominal bending	1	2.77	600
TrpB7_B7	20_dpr4_gal4_uas_stop_Trpa1_FruFLP6		Abdominal bending	1	1.61	600
TrpB7_L9	20_dpr6_gal4_uas_stop_Trpa1_FruFLP5		Abdominal bending	1	1.24	315.63
TrpB5_C7	20_dpr8_gal4_uas_stop_Trpa1_FruFLP2		Abdominal bending	1	0:00:02.071000	0:08:46.703000
TrpB5_A1	20_dpr9_gal4_uas_stop_Trpa1_FruFLP8		Abdominal bending	3	0:00:06.640000	0:07:12.847000
TrpB5_A6	20_dpr9_gal4_uas_stop_Trpa1_FruFLP9		Abdominal bending	2	0:00:21.990000	0:10:00.062000
TrpB4_E3	20_noGAL4_TrpA1_15		Abdominal bending	2	0:00:10.324000	0:08:12.598000
TrpB4_D5	20_noGAL4_TrpA1_3		Abdominal bending	1	0:08:11.459000	0:10:00.048000
TrpB1_A9	30_DIPbeta_gal4_uas_stop_Trpa1_FruFLP3		Abdominal bending	3	0:00:07.234000	0:10:00.026000
TrpB3_A3	30_DIPdelta_gal4_uas_stop_Trpa1_FruFLP12		Abdominal bending	1	0:00:01.051000	0:10:00.098000
TrpB1_R4	30_DIPeta_gal4_uas_stop_Trpa1_FruFLP1		Abdominal bending	7	0:00:13.932000	0:10:00.181000
TrpB3_K5	30_DIPeta_gal4_uas_stop_Trpa1_FruFLP12		Abdominal bending	2	0:00:16.516000	0:10:00.172000
TrpB3_L8	30_DIPeta_gal4_uas_stop_Trpa1_FruFLP13		Abdominal bending	2	0:00:07.879000	0:10:00.110000
TrpB3_P4	30_DIPeta_gal4_uas_stop_Trpa1_FruFLP14		Abdominal bending	1	0:00:00.760000	0:10:00.198000
TrpB1_P5	30_DIPeta_gal4_uas_stop_Trpa1_FruFLP2		Abdominal bending	9	0:00:10.450000	0:10:00.096000
TrpB2_N1	30_DIPeta_gal4_uas_stop_Trpa1_FruFLP7		Abdominal bending	1	0.62	600.08
TrpB2_D9	30_DIPeta_gal4_uas_stop_Trpa1_FruFLP9		Abdominal bending	3	75.83	600.03
TrpB1_G5	30_DIPgamma_gal4_uas_stop_Trpa1_FruFLP1		Abdominal bending	1	0:05:33.007000	0:10:00.119000
TrpB2_D4	30_DIPgamma_gal4_uas_stop_Trpa1_FruFLP10		Abdominal bending	2	518.19	600.04
TrpB3_K8	30_DIPgamma_gal4_uas_stop_Trpa1_FruFLP11		Abdominal bending	1	0:09:24.109000	0:10:00.160000
TrpB3_G9	30_DIPgamma_gal4_uas_stop_Trpa1_FruFLP12		Abdominal bending	3	0:07:15.045000	0:10:00.148000
TrpB3_D5	30_DIPgamma_gal4_uas_stop_Trpa1_FruFLP14		Abdominal bending	4	0:00:24.829000	0:10:00.127000
TrpB1_D9	30_DIPgamma_gal4_uas_stop_Trpa1_FruFLP4		Abdominal bending	2	0:06:56.933000	0:10:00.079000
TrpB2_J5	30_DIPgamma_gal4_uas_stop_Trpa1_FruFLP7		Abdominal bending	6	183.62	600.03
TrpB2_L7	30_DIPgamma_gal4_uas_stop_Trpa1_FruFLP8		Abdominal bending	6	69.42	600.18
TrpB2_O2	30_DIPgamma_gal4_uas_stop_Trpa1_FruFLP9		Abdominal bending	1	524.63	600.08
TrpB6_D8	30_dipTheta_gal4_uas_stop_TrpA1_ FruFLP14		Abdominal bending	4	0:01:47.509000	0:10:00.060000
TrpB6_F5	30_dipTheta_gal4_uas_stop_TrpA1_ FruFLP15		Abdominal bending	4	0:07:41.147000	0:10:00.067000
TrpB5_B8	30_dipTheta_gal4_uas_stop_TrpA1_FruFLP10		Abdominal bending	1	0:05:25.915000	0:10:00.038000
TrpB5_H8	30_dipTheta_gal4_uas_stop_TrpA1_FruFLP12		Abdominal bending	6	0:04:44.150000	0:10:00.136000
TrpB5_E6	30_dipTheta_gal4_uas_stop_TrpA1_FruFLP13		Abdominal bending	7	0:01:47.295000	0:10:00.013000
TrpB5_F6	30_dipTheta_gal4_uas_stop_TrpA1_FruFLP2		Abdominal bending	9	0:01:04.011000	0:10:00.119000
TrpB5_F5	30_dipTheta_gal4_uas_stop_TrpA1_FruFLP3		Abdominal bending	3	0:08:48.309000	0:10:00.163000
TrpB5_H9	30_dipTheta_gal4_uas_stop_TrpA1_FruFLP4		Abdominal bending	5	0:01:06.534000	0:10:00.136000
TrpB5_B3	30_dipTheta_gal4_uas_stop_TrpA1_FruFLP6		Abdominal bending	1	0:00:38.816000	0:10:00.072000
TrpB5_F8	30_dipTheta_gal4_uas_stop_TrpA1_FruFLP8		Abdominal bending	2	0:04:34.969000	0:10:00.113000
TrpB5_D5	30_dipTheta_gal4_uas_stop_TrpA1_FruFLP9		Abdominal bending	1	0:08:24.230000	0:10:00.155000
TrpB1_O1	30_dpr1_gal4_uas_stop_Trpa1_FruFLP2		Abdominal bending	2	0:05:23.037000	0:10:00.197000
TrpB1_N2	30_dpr1_gal4_uas_stop_Trpa1_FruFLP5		Abdominal bending	2	0:09:18.106000	0:10:00.078000
TrpB2_M3	30_dpr1_gal4_uas_stop_Trpa1_FruFLP6		Abdominal bending	1	575.85	600.09
TrpB2_F5	30_dpr1_gal4_uas_stop_Trpa1_FruFLP7		Abdominal bending	1	576.89	600.19
TrpB2_M5	30_dpr1_gal4_uas_stop_Trpa1_FruFLP8		Abdominal bending	1	595.48	600.05
TrpB1_K1	30_dpr10_gal4_uas_stop_Trpa1_FruFLP1		Abdominal bending	5	0:08:03.630000	0:10:00.188000
TrpB2_L4	30_dpr10_gal4_uas_stop_Trpa1_FruFLP10		Abdominal bending	1	543.22	600.78
TrpB3_H4	30_dpr10_gal4_uas_stop_Trpa1_FruFLP11		Abdominal bending	2	0:08:20.312000	0:10:00.083000
TrpB3_J8	30_dpr10_gal4_uas_stop_Trpa1_FruFLP12		Abdominal bending	3	0:09:38.206000	0:10:00.079000
TrpB3_B5	30_dpr10_gal4_uas_stop_Trpa1_FruFLP13		Abdominal bending	1	0:09:37.863000	0:10:00.107000
TrpB3_M1	30_dpr10_gal4_uas_stop_Trpa1_FruFLP14		Abdominal bending	2	0:09:34.683000	0:10:00.183000
TrpB3_B3	30_dpr10_gal4_uas_stop_Trpa1_FruFLP15		Abdominal bending	3	0:09:19.458000	0:10:00.114000
TrpB1_E9	30_dpr10_gal4_uas_stop_Trpa1_FruFLP2		Abdominal bending	1	0:09:35.404000	0:10:00.078000
TrpB1_R1	30_dpr10_gal4_uas_stop_Trpa1_FruFLP3		Abdominal bending	1	0:09:55.043000	0:10:00.009000
TrpB1_N8	30_dpr10_gal4_uas_stop_Trpa1_FruFLP4		Abdominal bending	1	0:09:54.028000	0:10:00.125000
TrpB1_D1	30_dpr10_gal4_uas_stop_Trpa1_FruFLP5		Abdominal bending	5	0:06:53.991000	0:10:00.049000
TrpB2_K8	30_dpr10_gal4_uas_stop_Trpa1_FruFLP6		Abdominal bending	1	576.92	600.14
TrpB2_B7	30_dpr10_gal4_uas_stop_Trpa1_FruFLP7		Abdominal bending	2	577.97	600.06
TrpB2_B1	30_dpr10_gal4_uas_stop_Trpa1_FruFLP8		Abdominal bending	1	581.54	600.03
TrpB2_S2	30_dpr10_gal4_uas_stop_Trpa1_FruFLP9		Abdominal bending	3	580.08	600.19
TrpB1_L7	30_dpr11_gal4_uas_stop_Trpa1_FruFLP1		Abdominal bending	1	0:09:31.742000	0:10:00.181000
TrpB2_K2	30_dpr11_gal4_uas_stop_Trpa1_FruFLP10		Abdominal bending	1	575.39	600.02
TrpB3_R2	30_dpr11_gal4_uas_stop_Trpa1_FruFLP11		Abdominal bending	1	0:09:52.813000	0:10:00.025000
TrpB3_P9	30_dpr11_gal4_uas_stop_Trpa1_FruFLP12		Abdominal bending	1	0:09:08.315000	0:10:00.125000
TrpB3_N6	30_dpr11_gal4_uas_stop_Trpa1_FruFLP13		Abdominal bending	1	0:09:50.018000	0:10:00.041000
TrpB3_R4	30_dpr11_gal4_uas_stop_Trpa1_FruFLP14		Abdominal bending	1	0:09:27.305000	0:10:00.091000
TrpB3_R5	30_dpr11_gal4_uas_stop_Trpa1_FruFLP15		Abdominal bending	1	0:09:35.877000	0:10:00.121000
TrpB1_F1	30_dpr11_gal4_uas_stop_Trpa1_FruFLP2		Abdominal bending	1	0:08:59.815000	0:10:00.073000
TrpB1_B5	30_dpr11_gal4_uas_stop_Trpa1_FruFLP3		Abdominal bending	3	0:09:26.938000	0:10:00.123000
TrpB1_M5	30_dpr11_gal4_uas_stop_Trpa1_FruFLP4		Abdominal bending	3	0:08:41.964000	0:10:00.127000
TrpB1_M9	30_dpr11_gal4_uas_stop_Trpa1_FruFLP5		Abdominal bending	2	0:08:41.406000	0:10:00.067000
TrpB2_M1	30_dpr11_gal4_uas_stop_Trpa1_FruFLP6		Abdominal bending	3	516.31	600.06
TrpB2_P9	30_dpr11_gal4_uas_stop_Trpa1_FruFLP7		Abdominal bending	1	588.22	600.06
TrpB2_J8	30_dpr11_gal4_uas_stop_Trpa1_FruFLP8		Abdominal bending	2	536.71	600.01
TrpB2_K7	30_dpr11_gal4_uas_stop_Trpa1_FruFLP9		Abdominal bending	1	596.62	600.08
TrpB1_D7	30_dpr12_gal4_uas_stop_Trpa1_FruFLP1		Abdominal bending	1	0:07:50.273000	0:10:00.180000
TrpB2_E1	30_dpr12_gal4_uas_stop_Trpa1_FruFLP10		Abdominal bending	1	528.02	600.09
TrpB3_E6	30_dpr12_gal4_uas_stop_Trpa1_FruFLP11		Abdominal bending	1	0:09:56.544000	0:10:00.188000
TrpB3_B7	30_dpr12_gal4_uas_stop_Trpa1_FruFLP12		Abdominal bending	1	0:09:58.568000	0:10:00.112000
TrpB3_E9	30_dpr12_gal4_uas_stop_Trpa1_FruFLP13		Abdominal bending	1	0:09:26.472000	0:10:00.054000
TrpB3_P1	30_dpr12_gal4_uas_stop_Trpa1_FruFLP14		Abdominal bending	2	0:08:53.436000	0:10:00.109000
TrpB1_A1	30_dpr12_gal4_uas_stop_Trpa1_FruFLP2		Abdominal bending	6	0:09:21.536000	0:10:00.016000
TrpB1_G8	30_dpr12_gal4_uas_stop_Trpa1_FruFLP3		Abdominal bending	1	0:09:02.323000	0:10:00.193000
TrpB1_F9	30_dpr12_gal4_uas_stop_Trpa1_FruFLP4		Abdominal bending	2	0:09:52.352000	0:10:00.018000
TrpB1_F5	30_dpr12_gal4_uas_stop_Trpa1_FruFLP5		Abdominal bending	1	0:05:06.528000	0:10:00.096000
TrpB2_P3	30_dpr12_gal4_uas_stop_Trpa1_FruFLP6		Abdominal bending	2	573.14	600.07
TrpB2_A4	30_dpr12_gal4_uas_stop_Trpa1_FruFLP7		Abdominal bending	2	571.59	600.12
TrpB2_B3	30_dpr12_gal4_uas_stop_Trpa1_FruFLP8		Abdominal bending	1	558.37	600.1
TrpB2_C1	30_dpr12_gal4_uas_stop_Trpa1_FruFLP9		Abdominal bending	1	537	600
TrpB7_S5	30_dpr14_gal4_uas_stop_TrpA1_ FruFLP10		Abdominal bending	1	0.55	600
TrpB7_L1	30_dpr14_gal4_uas_stop_TrpA1_ FruFLP11		Abdominal bending	12	32.85	600
TrpB7_W9	30_dpr14_gal4_uas_stop_TrpA1_ FruFLP12		Abdominal bending	2	13.72	600
TrpB7_H6	30_dpr14_gal4_uas_stop_TrpA1_ FruFLP15		Abdominal bending	2	5.45	600
TrpB7_D4	30_dpr14_gal4_uas_stop_TrpA1_ FruFLP2		Abdominal bending	4	42.23	600
TrpB7_Q4	30_dpr14_gal4_uas_stop_TrpA1_ FruFLP9		Abdominal bending	2	2.62	600
TrpB5_H6	30_dpr15_gal4_uas_stop_TrpA1_7		Abdominal bending	7	0:00:31.515000	0:10:00.124000
TrpB4_A6	30_Dpr15_gal4_uas_stop_Trpa1_FruFLP1		Abdominal bending	1	0:00:19.499000	0:10:00.102000
TrpB6_D3	30_dpr15_gal4_uas_stop_Trpa1_FruFLP11		Abdominal bending	12	0:02:58.458000	0:10:00.018000
TrpB6_H9	30_dpr15_gal4_uas_stop_Trpa1_FruFLP13		Abdominal bending	1	0:05:45.607000	0:10:00.003000
TrpB6_A9	30_dpr15_gal4_uas_stop_Trpa1_FruFLP14		Abdominal bending	11	0:05:57.250000	0:10:00.041000
TrpB4_G1	30_Dpr15_gal4_uas_stop_Trpa1_FruFLP2		Abdominal bending	5	0:00:57.615000	0:10:00.163000
TrpB4_E7	30_Dpr15_gal4_uas_stop_Trpa1_FruFLP3		Abdominal bending	2	0:00:32.959000	0:10:00.177000
TrpB4_A5	30_Dpr15_gal4_uas_stop_Trpa1_FruFLP5		Abdominal bending	4	0:04:45.265000	0:10:00.008000
TrpB6_B1	30_dpr15_gal4_uas_stop_Trpa1_FruFLP9		Abdominal bending	1	0:00:04.575000	0:10:00.020000
TrpB3_C1	30_dpr16_gal4_uas_stop_Trpa1_FruFLP15		Abdominal bending	4	0:03:43.570000	0:10:00.075000
TrpB2_L8	30_dpr16_gal4_uas_stop_Trpa1_FruFLP7		Abdominal bending	3	4.01	600.02
TrpB4_E1	30_Dpr17_gal4_uas_stop_Trpa1_FruFLP4		Abdominal bending	4	0:01:38.435000	0:10:00.123000
TrpB4_B6	30_Dpr17_gal4_uas_stop_Trpa1_FruFLP8		Abdominal bending	3	0:02:45.353000	0:10:00.185000
TrpB7_F8	30_dpr18_gal4_uas_stop_TrpA1_ FruFLP1		Abdominal bending	6	24.68	600
TrpB7_R8	30_dpr18_gal4_uas_stop_TrpA1_ FruFLP12		Abdominal bending	1	7.31	600
TrpB7_B5	30_dpr18_gal4_uas_stop_TrpA1_ FruFLP14		Abdominal bending	1	1.69	600
TrpB7_T9	30_dpr18_gal4_uas_stop_TrpA1_ FruFLP2		Abdominal bending	1	1.25	600
TrpB7_Q7	30_dpr18_gal4_uas_stop_TrpA1_ FruFLP6		Abdominal bending	1	0.31	600
TrpB7_P3	30_dpr18_gal4_uas_stop_TrpA1_ FruFLP7		Abdominal bending	2	13.25	600
TrpB6_G8	30_dpr2_gal4_uas_stop_TrpA1_ FruFLP15		Abdominal bending	1	0:00:00.262000	0:10:00.206000
TrpB6_E1	30_dpr2_gal4_uas_stop_TrpA1_ FruFLP8		Abdominal bending	6	0:06:40.002000	0:10:00.130000
TrpB6_A1	30_dpr2_gal4_uas_stop_TrpA1_ FruFLP9		Abdominal bending	1	0:00:01.972000	0:10:00.033000
TrpB5_H1	30_dpr2_gal4_uas_stop_TrpA1_FruFLP2		Abdominal bending	1	0:00:02.330000	0:10:00.097000
TrpB1_A7	30_dpr3_gal4_uas_stop_Trpa1_FruFLP1		Abdominal bending	9	0:00:24.650000	0:10:00.079000
TrpB2_R9	30_dpr3_gal4_uas_stop_Trpa1_FruFLP10		Abdominal bending	2	14.49	600.03
TrpB3_H5	30_dpr3_gal4_uas_stop_Trpa1_FruFLP13		Abdominal bending	3	0:04:45.791000	0:10:00.061000
TrpB3_O6	30_dpr3_gal4_uas_stop_Trpa1_FruFLP15		Abdominal bending	1	0:08:37.457000	0:10:00.072000
TrpB7_O7	30_dpr4_gal4_uas_stop_TrpA1_ FruFLP10		Abdominal bending	2	9.48	600
TrpB7_A2	30_dpr4_gal4_uas_stop_TrpA1_ FruFLP12		Abdominal bending	10	214.62	600
TrpB7_D6	30_dpr4_gal4_uas_stop_TrpA1_ FruFLP2		Abdominal bending	11	357.22	600
TrpB7_T1	30_dpr4_gal4_uas_stop_TrpA1_ FruFLP3		Abdominal bending	5	42.79	600
TrpB7_F7	30_dpr4_gal4_uas_stop_TrpA1_ FruFLP4		Abdominal bending	2	533.87	600
TrpB7_U5	30_dpr4_gal4_uas_stop_TrpA1_ FruFLP6		Abdominal bending	1	2.81	600
TrpB7_R3	30_dpr4_gal4_uas_stop_TrpA1_ FruFLP9		Abdominal bending	7	30.12	600
TrpB1_D4	30_dpr5_gal4_uas_stop_Trpa1_FruFLP1		Abdominal bending	2	0:08:53.935000	0:10:00.073000
TrpB2_O7	30_dpr5_gal4_uas_stop_Trpa1_FruFLP10		Abdominal bending	1	593.94	600.17
TrpB3_O9	30_dpr5_gal4_uas_stop_Trpa1_FruFLP11		Abdominal bending	1	0:09:43.600000	0:10:00.171000
TrpB3_M4	30_dpr5_gal4_uas_stop_Trpa1_FruFLP12		Abdominal bending	1	0:09:19.166000	0:10:00.065000
TrpB3_S4	30_dpr5_gal4_uas_stop_Trpa1_FruFLP13		Abdominal bending	1	0:09:07.484000	0:10:00.154000
TrpB3_C2	30_dpr5_gal4_uas_stop_Trpa1_FruFLP14		Abdominal bending	1	0:08:54.676000	0:10:00.168000
TrpB1_R6	30_dpr5_gal4_uas_stop_Trpa1_FruFLP2		Abdominal bending	1	0:06:23.003000	0:10:00.013000
TrpB1_M2	30_dpr5_gal4_uas_stop_Trpa1_FruFLP3		Abdominal bending	1	0:07:05.916000	0:10:00.172000
TrpB1_E7	30_dpr5_gal4_uas_stop_Trpa1_FruFLP4		Abdominal bending	1	0:09:27.660000	0:10:00.110000
TrpB2_R3	30_dpr5_gal4_uas_stop_Trpa1_FruFLP6		Abdominal bending	1	580.19	600.09
TrpB2_G9	30_dpr5_gal4_uas_stop_Trpa1_FruFLP7		Abdominal bending	1	589.76	600.05
TrpB2_H9	30_dpr5_gal4_uas_stop_Trpa1_FruFLP8		Abdominal bending	1	577.82	600.15
TrpB2_D1	30_dpr5_gal4_uas_stop_Trpa1_FruFLP9		Abdominal bending	1	557.26	600.18
TrpB7_F3	30_dpr6_gal4_uas_stop_TrpA1_ FruFLP1		Abdominal bending	1	1.96	600
TrpB7_A8	30_dpr6_gal4_uas_stop_TrpA1_ FruFLP10		Abdominal bending	11	18.05	600
TrpB7_P8	30_dpr6_gal4_uas_stop_TrpA1_ FruFLP11		Abdominal bending	7	39.02	600
TrpB7_E4	30_dpr6_gal4_uas_stop_TrpA1_ FruFLP12		Abdominal bending	3	73.77	600
TrpB7_V4	30_dpr6_gal4_uas_stop_TrpA1_ FruFLP13		Abdominal bending	5	8.96	600
TrpB7_S3	30_dpr6_gal4_uas_stop_TrpA1_ FruFLP3		Abdominal bending	9	456.11	600
TrpB7_J7	30_dpr6_gal4_uas_stop_TrpA1_ FruFLP4		Abdominal bending	9	68.27	600
TrpB7_N7	30_dpr6_gal4_uas_stop_TrpA1_ FruFLP5		Abdominal bending	1	555.05	600
TrpB7_X3	30_dpr6_gal4_uas_stop_TrpA1_ FruFLP6		Abdominal bending	20	253.48	600
TrpB7_P6	30_dpr6_gal4_uas_stop_TrpA1_ FruFLP7		Abdominal bending	7	32.21	600
TrpB7_X5	30_dpr6_gal4_uas_stop_TrpA1_ FruFLP8		Abdominal bending	4	534.47	600
TrpB7_T2	30_dpr6_gal4_uas_stop_TrpA1_ FruFLP9		Abdominal bending	4	6.95	600
TrpB6_D6	30_dpr8_gal4_uas_stop_Trpa1_FruFLP5		Abdominal bending	1	0:00:00.527000	0:10:00.015000
TrpB5_G3	30_dpr9_gal4_uas_stop_TrpA1_FruFLP1		Abdominal bending	2	0:00:06.365000	0:10:00.138000
TrpB6_F9	30_dpr9_gal4_uas_stop_Trpa1_FruFLP10		Abdominal bending	6	0:00:31.848000	0:10:00.043000
TrpB6_H3	30_dpr9_gal4_uas_stop_Trpa1_FruFLP11		Abdominal bending	10	0:01:08.254000	0:10:00.193000
TrpB6_C6	30_dpr9_gal4_uas_stop_Trpa1_FruFLP12		Abdominal bending	3	0:01:57.008000	0:10:00.182000
TrpB6_G9	30_dpr9_gal4_uas_stop_Trpa1_FruFLP13		Abdominal bending	10	0:03:43.789000	0:10:00.081000
TrpB6_H5	30_dpr9_gal4_uas_stop_Trpa1_FruFLP14		Abdominal bending	12	0:07:46.491000	0:10:00.158000
TrpB6_F7	30_dpr9_gal4_uas_stop_Trpa1_FruFLP15		Abdominal bending	3	0:08:29.522000	0:10:00.057000
TrpB5_C8	30_dpr9_gal4_uas_stop_TrpA1_FruFLP2		Abdominal bending	1	0:09:16.913000	0:10:00.042000
TrpB5_E2	30_dpr9_gal4_uas_stop_TrpA1_FruFLP3		Abdominal bending	1	0:09:22.162000	0:10:00.040000
TrpB5_C9	30_dpr9_gal4_uas_stop_TrpA1_FruFLP4		Abdominal bending	10	0:06:46.090000	0:10:00.126000
TrpB5_E4	30_dpr9_gal4_uas_stop_TrpA1_FruFLP5		Abdominal bending	8	0:05:49.380000	0:10:00.050000
TrpB5_A3	30_dpr9_gal4_uas_stop_TrpA1_FruFLP6		Abdominal bending	2	0:08:36.457000	0:10:00.059000
TrpB5_F9	30_dpr9_gal4_uas_stop_TrpA1_FruFLP7		Abdominal bending	2	0:09:10.786000	0:10:00.031000
TrpB5_D4	30_dpr9_gal4_uas_stop_TrpA1_FruFLP8		Abdominal bending	1	0:08:24.372000	0:10:00.104000
TrpB5_G4	30_dpr9_gal4_uas_stop_TrpA1_FruFLP9		Abdominal bending	4	0:08:01.504000	0:10:00.171000
TrpB4_B1	30_noGAL4_TrpA1_15		Abdominal bending	1	0:00:03.184000	0:10:00.118000
TrpB7_C8	20_CSxwCS_1		Attempted copulation	4	0	300.28
TrpB7_R9	20_CSxwCS_10		Attempted copulation	3	0	399.42
TrpB7_T6	20_CSxwCS_11		Attempted copulation	6	0	600
TrpB7_T3	20_CSxwCS_13		Attempted copulation	5	0	330.5
TrpB7_E1	20_CSxwCS_14		Attempted copulation	2	0	600
TrpB7_V7	20_CSxwCS_15		Attempted copulation	2	0	102.46
TrpB7_V3	20_CSxwCS_2		Attempted copulation	13	0	600
TrpB7_E8	20_CSxwCS_3		Attempted copulation	7	0	600
TrpB7_Y2	20_CSxwCS_4		Attempted copulation	3	0	600
TrpB7_G9	20_CSxwCS_5		Attempted copulation	4	0	600
TrpB7_P2	20_CSxwCS_7		Attempted copulation	2	0	600
TrpB7_B2	20_CSxwCS_9		Attempted copulation	3	0	346.45
TrpB2_M2	20_DIPalpha_gal4_uas_stop_Trpa1_FruFLP10		Attempted copulation	2	0	174.67
TrpB3_R7	20_DIPalpha_gal4_uas_stop_Trpa1_FruFLP12		Attempted copulation	1	0	0:09:21.668000
TrpB3_J1	20_DIPalpha_gal4_uas_stop_Trpa1_FruFLP13		Attempted copulation	2	0	0:04:52.433000
TrpB3_O1	20_DIPalpha_gal4_uas_stop_Trpa1_FruFLP14		Attempted copulation	2	0	0:02:14.643000
TrpB3_S5	20_DIPalpha_gal4_uas_stop_Trpa1_FruFLP15		Attempted copulation	2	0	0:03:57.978000
TrpB1_K3	20_DIPalpha_gal4_uas_stop_Trpa1_FruFLP2		Attempted copulation	1	0	0:07:32.279000
TrpB1_K8	20_DIPalpha_gal4_uas_stop_Trpa1_FruFLP3		Attempted copulation	2	0	0:09:03.091000
TrpB1_N3	20_DIPalpha_gal4_uas_stop_Trpa1_FruFLP4		Attempted copulation	2	0	0:03:04.995000
TrpB1_H6	20_DIPalpha_gal4_uas_stop_Trpa1_FruFLP5		Attempted copulation	2	0	0:09:18.044000
TrpB2_H3	20_DIPalpha_gal4_uas_stop_Trpa1_FruFLP7		Attempted copulation	1	0	207.29
TrpB2_C9	20_DIPalpha_gal4_uas_stop_Trpa1_FruFLP8		Attempted copulation	1	0	426.68
TrpB2_F6	20_DIPalpha_gal4_uas_stop_Trpa1_FruFLP9		Attempted copulation	4	0	600.15
TrpB1_E3	20_DIPbeta_gal4_uas_stop_Trpa1_FruFLP1		Attempted copulation	4	0	0:10:00.180000
TrpB2_A5	20_DIPbeta_gal4_uas_stop_Trpa1_FruFLP10		Attempted copulation	1	0	232.5
TrpB3_H8	20_DIPbeta_gal4_uas_stop_Trpa1_FruFLP11		Attempted copulation	5	0	0:01:03.272000
TrpB3_B1	20_DIPbeta_gal4_uas_stop_Trpa1_FruFLP12		Attempted copulation	2	0	0:02:31.486000
TrpB3_M8	20_DIPbeta_gal4_uas_stop_Trpa1_FruFLP13		Attempted copulation	1	0	0:05:46.335000
TrpB3_K7	20_DIPbeta_gal4_uas_stop_Trpa1_FruFLP14		Attempted copulation	1	0	0:02:08.277000
TrpB3_L5	20_DIPbeta_gal4_uas_stop_Trpa1_FruFLP15		Attempted copulation	1	0	0:07:15.697000
TrpB1_P8	20_DIPbeta_gal4_uas_stop_Trpa1_FruFLP2		Attempted copulation	7	0	0:05:30.856000
TrpB1_O6	20_DIPbeta_gal4_uas_stop_Trpa1_FruFLP3		Attempted copulation	7	0	0:03:58.163000
TrpB1_B1	20_DIPbeta_gal4_uas_stop_Trpa1_FruFLP4		Attempted copulation	3	0	0:02:27.045000
TrpB1_G3	20_DIPbeta_gal4_uas_stop_Trpa1_FruFLP5		Attempted copulation	1	0	0:03:43.487000
TrpB2_H7	20_DIPbeta_gal4_uas_stop_Trpa1_FruFLP6		Attempted copulation	4	0	120.41
TrpB2_B2	20_DIPbeta_gal4_uas_stop_Trpa1_FruFLP7		Attempted copulation	2	0	398.83
TrpB2_L2	20_DIPbeta_gal4_uas_stop_Trpa1_FruFLP8		Attempted copulation	3	0	422.88
TrpB2_G5	20_DIPbeta_gal4_uas_stop_Trpa1_FruFLP9		Attempted copulation	7	0	367.55
TrpB2_S3	20_DIPdelta_gal4_uas_stop_Trpa1_FruFLP10		Attempted copulation	5	0	278.88
TrpB3_K1	20_DIPdelta_gal4_uas_stop_Trpa1_FruFLP11		Attempted copulation	3	0	0:05:24.386000
TrpB3_G8	20_DIPdelta_gal4_uas_stop_Trpa1_FruFLP12		Attempted copulation	1	0	0:03:18.958000
TrpB3_A4	20_DIPdelta_gal4_uas_stop_Trpa1_FruFLP14		Attempted copulation	2	0	0:02:27.474000
TrpB3_L7	20_DIPdelta_gal4_uas_stop_Trpa1_FruFLP15		Attempted copulation	4	0	0:04:58.971000
TrpB1_L3	20_DIPdelta_gal4_uas_stop_Trpa1_FruFLP2		Attempted copulation	3	0	0:01:39.794000
TrpB1_C5	20_DIPdelta_gal4_uas_stop_Trpa1_FruFLP3		Attempted copulation	8	0	0:03:00.583000
TrpB1_H9	20_DIPdelta_gal4_uas_stop_Trpa1_FruFLP4		Attempted copulation	1	0	0:02:07.687000
TrpB2_C3	20_DIPdelta_gal4_uas_stop_Trpa1_FruFLP6		Attempted copulation	3	0	363.11
TrpB2_M9	20_DIPdelta_gal4_uas_stop_Trpa1_FruFLP7		Attempted copulation	5	0	600.2
TrpB2_C2	20_DIPdelta_gal4_uas_stop_Trpa1_FruFLP8		Attempted copulation	1	0	119.18
TrpB2_K6	20_DIPdelta_gal4_uas_stop_Trpa1_FruFLP9		Attempted copulation	1	0	142.27
TrpB1_P1	20_DIPepsilon_gal4_uas_stop_Trpa1_FruFLP1		Attempted copulation	3	0	0:00:52.946000
TrpB3_K6	20_DIPepsilon_gal4_uas_stop_Trpa1_FruFLP11		Attempted copulation	1	0	0:01:04.455000
TrpB3_J3	20_DIPepsilon_gal4_uas_stop_Trpa1_FruFLP12		Attempted copulation	1	0	0:01:34.537000
TrpB3_P8	20_DIPepsilon_gal4_uas_stop_Trpa1_FruFLP13		Attempted copulation	4	0	0:03:29.783000
TrpB3_L9	20_DIPepsilon_gal4_uas_stop_Trpa1_FruFLP14		Attempted copulation	5	0	0:05:01.660000
TrpB3_C6	20_DIPepsilon_gal4_uas_stop_Trpa1_FruFLP15		Attempted copulation	7	0	0:06:50.581000
TrpB1_A4	20_DIPepsilon_gal4_uas_stop_Trpa1_FruFLP2		Attempted copulation	1	0	0:04:25.812000
TrpB1_P9	20_DIPepsilon_gal4_uas_stop_Trpa1_FruFLP5		Attempted copulation	1	0	0:02:05.508000
TrpB2_E6	20_DIPepsilon_gal4_uas_stop_Trpa1_FruFLP6		Attempted copulation	1	0	59.62
TrpB2_H1	20_DIPeta_gal4_uas_stop_Trpa1_FruFLP10		Attempted copulation	2	0	600.03
TrpB3_K4	20_DIPeta_gal4_uas_stop_Trpa1_FruFLP11		Attempted copulation	3	0	0:10:00.127000
TrpB3_E8	20_DIPeta_gal4_uas_stop_Trpa1_FruFLP12		Attempted copulation	4	0	0:06:24.893000
TrpB3_S3	20_DIPeta_gal4_uas_stop_Trpa1_FruFLP13		Attempted copulation	4	0	0:01:55.486000
TrpB3_C4	20_DIPeta_gal4_uas_stop_Trpa1_FruFLP14		Attempted copulation	3	0	0:02:41.344000
TrpB3_G4	20_DIPeta_gal4_uas_stop_Trpa1_FruFLP15		Attempted copulation	2	0	0:01:50.097000
TrpB1_L9	20_DIPeta_gal4_uas_stop_Trpa1_FruFLP2		Attempted copulation	3	0	0:02:57.108000
TrpB1_H8	20_DIPeta_gal4_uas_stop_Trpa1_FruFLP3		Attempted copulation	2	0	0:03:53.015000
TrpB1_G2	20_DIPeta_gal4_uas_stop_Trpa1_FruFLP5		Attempted copulation	4	0	0:08:51.022000
TrpB2_R5	20_DIPeta_gal4_uas_stop_Trpa1_FruFLP6		Attempted copulation	2	0	109.96
TrpB2_x001F__E7	20_DIPeta_gal4_uas_stop_Trpa1_FruFLP7		Attempted copulation	3	0	600.08
TrpB2_S4	20_DIPeta_gal4_uas_stop_Trpa1_FruFLP8		Attempted copulation	2	0	398.33
TrpB2_N4	20_DIPeta_gal4_uas_stop_Trpa1_FruFLP9		Attempted copulation	1	0	600.13
TrpB1_R5	20_DIPgamma_gal4_uas_stop_Trpa1_FruFLP1		Attempted copulation	6	0	0:08:53.234000
TrpB2_N8	20_DIPgamma_gal4_uas_stop_Trpa1_FruFLP10		Attempted copulation	1	0	182.06
TrpB3_M3	20_DIPgamma_gal4_uas_stop_Trpa1_FruFLP11		Attempted copulation	1	0	0:02:42.838000
TrpB3_F9	20_DIPgamma_gal4_uas_stop_Trpa1_FruFLP12		Attempted copulation	8	0	0:03:44.073000
TrpB3_P5	20_DIPgamma_gal4_uas_stop_Trpa1_FruFLP13		Attempted copulation	4	0	0:05:19.115000
TrpB3_M2	20_DIPgamma_gal4_uas_stop_Trpa1_FruFLP14		Attempted copulation	2	0	0:07:16.523000
TrpB3_H3	20_DIPgamma_gal4_uas_stop_Trpa1_FruFLP15		Attempted copulation	6	0	0:02:41.530000
TrpB1_O7	20_DIPgamma_gal4_uas_stop_Trpa1_FruFLP2		Attempted copulation	2	0	0:10:00.035000
TrpB1_F6	20_DIPgamma_gal4_uas_stop_Trpa1_FruFLP4		Attempted copulation	4	0	0:08:30.486000
TrpB1_K4	20_DIPgamma_gal4_uas_stop_Trpa1_FruFLP5		Attempted copulation	4	0	0:06:21.843000
TrpB2_S1	20_DIPgamma_gal4_uas_stop_Trpa1_FruFLP6		Attempted copulation	2	0	129.1
TrpB2_L9	20_DIPgamma_gal4_uas_stop_Trpa1_FruFLP7		Attempted copulation	6	0	334.76
TrpB2_B4	20_DIPgamma_gal4_uas_stop_Trpa1_FruFLP8		Attempted copulation	5	0	119.55
TrpB2_H6	20_DIPgamma_gal4_uas_stop_Trpa1_FruFLP9		Attempted copulation	4	0	120.91
TrpB5_F1	20_DIPTheta_gal4_uas_stop_Trpa1_FruFLP1		Attempted copulation	10	0	0:07:08.784000
TrpB5_E8	20_DIPTheta_gal4_uas_stop_Trpa1_FruFLP10		Attempted copulation	1	0	0:03:31.044000
TrpB5_G6	20_DIPTheta_gal4_uas_stop_Trpa1_FruFLP11		Attempted copulation	6	0	0:01:43.151000
TrpB5_F4	20_DIPTheta_gal4_uas_stop_Trpa1_FruFLP12		Attempted copulation	3	0	0:05:05.949000
TrpB6_E8	20_DIPTheta_gal4_uas_stop_Trpa1_FruFLP13		Attempted copulation	1	0	0:10:00.025000
TrpB6_H1	20_DIPTheta_gal4_uas_stop_Trpa1_FruFLP14		Attempted copulation	10	0	0:10:00.205000
TrpB6_H4	20_DIPTheta_gal4_uas_stop_Trpa1_FruFLP15		Attempted copulation	12	0	0:10:00.126000
TrpB5_H4	20_DIPTheta_gal4_uas_stop_Trpa1_FruFLP2		Attempted copulation	4	0	0:02:48.315000
TrpB5_A7	20_DIPTheta_gal4_uas_stop_Trpa1_FruFLP4		Attempted copulation	4	0	0:04:06.779000
TrpB5_D2	20_DIPTheta_gal4_uas_stop_Trpa1_FruFLP5		Attempted copulation	4	0	0:09:14.491000
TrpB5_C6	20_DIPTheta_gal4_uas_stop_Trpa1_FruFLP6		Attempted copulation	6	0	0:08:48.689000
TrpB5_A5	20_DIPTheta_gal4_uas_stop_Trpa1_FruFLP7		Attempted copulation	4	0	0:05:15.687000
TrpB5_A2	20_DIPTheta_gal4_uas_stop_Trpa1_FruFLP8		Attempted copulation	1	0	0:10:00.104000
TrpB5_H3	20_DIPTheta_gal4_uas_stop_Trpa1_FruFLP9		Attempted copulation	2	0	0:10:00.150000
TrpB1_B3	20_DIPzeta_gal4_uas_stop_Trpa1_FruFLP1		Attempted copulation	2	0	0:02:17.037000
TrpB2_L3	20_DIPzeta_gal4_uas_stop_Trpa1_FruFLP10		Attempted copulation	2	0	156.74
TrpB3_P3	20_DIPzeta_gal4_uas_stop_Trpa1_FruFLP11		Attempted copulation	4	0	0:07:25.724000
TrpB3_N5	20_DIPzeta_gal4_uas_stop_Trpa1_FruFLP13		Attempted copulation	2	0	0:01:53.743000
TrpB3_R3	20_DIPzeta_gal4_uas_stop_Trpa1_FruFLP14		Attempted copulation	3	0	0:02:26.676000
TrpB3_G2	20_DIPzeta_gal4_uas_stop_Trpa1_FruFLP15		Attempted copulation	8	0	0:05:16.895000
TrpB1_F8	20_DIPzeta_gal4_uas_stop_Trpa1_FruFLP3		Attempted copulation	3	0	0:03:04.539000
TrpB1_S6	20_DIPzeta_gal4_uas_stop_Trpa1_FruFLP4		Attempted copulation	1	0	0:00:55.903000
TrpB1_O9	20_DIPzeta_gal4_uas_stop_Trpa1_FruFLP5		Attempted copulation	9	0	0:05:02.724000
TrpB2_A9	20_DIPzeta_gal4_uas_stop_Trpa1_FruFLP6		Attempted copulation	3	0	82.33
TrpB2_F8	20_DIPzeta_gal4_uas_stop_Trpa1_FruFLP7		Attempted copulation	1	0	282.69
TrpB2_F9	20_DIPzeta_gal4_uas_stop_Trpa1_FruFLP8		Attempted copulation	1	0	275.74
TrpB2_K1	20_DIPzeta_gal4_uas_stop_Trpa1_FruFLP9		Attempted copulation	3	0	65.64
TrpB1_C6	20_dpr1_gal4_uas_stop_Trpa1_FruFLP1		Attempted copulation	4	0	0:10:00.194000
TrpB2_G1	20_dpr1_gal4_uas_stop_Trpa1_FruFLP10		Attempted copulation	5	0	600.18
TrpB3_K2	20_dpr1_gal4_uas_stop_Trpa1_FruFLP11		Attempted copulation	1	0	0:01:22.804000
TrpB3_K9	20_dpr1_gal4_uas_stop_Trpa1_FruFLP13		Attempted copulation	3	0	0:02:16.539000
TrpB3_F7	20_dpr1_gal4_uas_stop_Trpa1_FruFLP14		Attempted copulation	1	0	0:10:00.075000
TrpB3_S2	20_dpr1_gal4_uas_stop_Trpa1_FruFLP15		Attempted copulation	7	0	0:10:00.050000
TrpB1_K6	20_dpr1_gal4_uas_stop_Trpa1_FruFLP2		Attempted copulation	1	0	0:10:00.151000
TrpB1_R7	20_dpr1_gal4_uas_stop_Trpa1_FruFLP3		Attempted copulation	3	0	0:07:09.424000
TrpB1_R2	20_dpr1_gal4_uas_stop_Trpa1_FruFLP4		Attempted copulation	3	0	0:02:41.954000
TrpB1_P6	20_dpr1_gal4_uas_stop_Trpa1_FruFLP5		Attempted copulation	2	0	0:02:58.374000
TrpB2_F1	20_dpr1_gal4_uas_stop_Trpa1_FruFLP6		Attempted copulation	4	0	600.01
TrpB2_O5	20_dpr1_gal4_uas_stop_Trpa1_FruFLP8		Attempted copulation	2	0	600.13
TrpB2_S5	20_dpr1_gal4_uas_stop_Trpa1_FruFLP9		Attempted copulation	2	0	78.36
TrpB1_E5	20_dpr10_gal4_uas_stop_Trpa1_FruFLP1		Attempted copulation	4	0	0:04:43.539000
TrpB3_E7	20_dpr10_gal4_uas_stop_Trpa1_FruFLP11		Attempted copulation	1	0	0:00:46.908000
TrpB3_R1	20_dpr10_gal4_uas_stop_Trpa1_FruFLP13		Attempted copulation	1	0	0:01:51.386000
TrpB3_H2	20_dpr10_gal4_uas_stop_Trpa1_FruFLP14		Attempted copulation	2	0	0:10:00.092000
TrpB3_J7	20_dpr10_gal4_uas_stop_Trpa1_FruFLP15		Attempted copulation	5	0	0:01:55.997000
TrpB1_H2	20_dpr10_gal4_uas_stop_Trpa1_FruFLP3		Attempted copulation	12	0	0:08:03.247000
TrpB1_D6	20_dpr10_gal4_uas_stop_Trpa1_FruFLP4		Attempted copulation	3	0	0:03:01.037000
TrpB1_S4	20_dpr10_gal4_uas_stop_Trpa1_FruFLP5		Attempted copulation	3	0	0:07:48.857000
TrpB2_B9	20_dpr10_gal4_uas_stop_Trpa1_FruFLP6		Attempted copulation	5	0	600.02
TrpB2_D7	20_dpr10_gal4_uas_stop_Trpa1_FruFLP7		Attempted copulation	5	0	494.1
TrpB2_E3	20_dpr10_gal4_uas_stop_Trpa1_FruFLP8		Attempted copulation	7	0	244.3
TrpB1_F2	20_dpr11_gal4_uas_stop_Trpa1_FruFLP1		Attempted copulation	7	0	0:10:00.070000
TrpB2_C6	20_dpr11_gal4_uas_stop_Trpa1_FruFLP10		Attempted copulation	5	0	154.47
TrpB3_J5	20_dpr11_gal4_uas_stop_Trpa1_FruFLP11		Attempted copulation	1	0	0:10:00.186000
TrpB3_P6	20_dpr11_gal4_uas_stop_Trpa1_FruFLP12		Attempted copulation	2	0	0:10:00.085000
TrpB3_A6	20_dpr11_gal4_uas_stop_Trpa1_FruFLP13		Attempted copulation	6	0	0:10:00.194000
TrpB3_J6	20_dpr11_gal4_uas_stop_Trpa1_FruFLP15		Attempted copulation	1	0	0:10:00.134000
TrpB1_N1	20_dpr11_gal4_uas_stop_Trpa1_FruFLP2		Attempted copulation	1	0	0:05:37.975000
TrpB1_L2	20_dpr11_gal4_uas_stop_Trpa1_FruFLP3		Attempted copulation	7	0	0:09:11.532000
TrpB1_P7	20_dpr11_gal4_uas_stop_Trpa1_FruFLP4		Attempted copulation	3	0	0:10:00.082000
TrpB2_A1	20_dpr11_gal4_uas_stop_Trpa1_FruFLP6		Attempted copulation	8	0	302.94
TrpB2_D5	20_dpr11_gal4_uas_stop_Trpa1_FruFLP7		Attempted copulation	5	0	332.79
TrpB2_R2	20_dpr11_gal4_uas_stop_Trpa1_FruFLP8		Attempted copulation	5	0	416.04
TrpB1_M8	20_dpr12_gal4_uas_stop_Trpa1_FruFLP1		Attempted copulation	1	0	0:10:00.072000
TrpB2_R6	20_dpr12_gal4_uas_stop_Trpa1_FruFLP10		Attempted copulation	1	0	600.11
TrpB3_D9	20_dpr12_gal4_uas_stop_Trpa1_FruFLP11		Attempted copulation	2	0	0:10:00.043000
TrpB3_D4	20_dpr12_gal4_uas_stop_Trpa1_FruFLP12		Attempted copulation	1	0	0:01:43.811000
TrpB3_S1	20_dpr12_gal4_uas_stop_Trpa1_FruFLP13		Attempted copulation	2	0	0:10:00.004000
TrpB3_A2	20_dpr12_gal4_uas_stop_Trpa1_FruFLP14		Attempted copulation	2	0	0:08:10.492000
TrpB3_R8	20_dpr12_gal4_uas_stop_Trpa1_FruFLP15		Attempted copulation	7	0	0:10:00.075000
TrpB1_H7	20_dpr12_gal4_uas_stop_Trpa1_FruFLP2		Attempted copulation	1	0	0:10:00.062000
TrpB1_F7	20_dpr12_gal4_uas_stop_Trpa1_FruFLP3		Attempted copulation	4	0	0:10:00.132000
TrpB1_C4	20_dpr12_gal4_uas_stop_Trpa1_FruFLP5		Attempted copulation	3	0	0:10:00.027000
TrpB2_J2	20_dpr12_gal4_uas_stop_Trpa1_FruFLP6		Attempted copulation	2	0	600.1
TrpB2_C5	20_dpr12_gal4_uas_stop_Trpa1_FruFLP8		Attempted copulation	1	0	600.11
TrpB2_K5	20_dpr12_gal4_uas_stop_Trpa1_FruFLP9		Attempted copulation	1	0	385.79
TrpB7_Q2	20_dpr14_gal4_uas_stop_Trpa1_FruFLP1		Attempted copulation	4	0	600
TrpB7_B3	20_dpr14_gal4_uas_stop_Trpa1_FruFLP13		Attempted copulation	2	0	600
TrpB7_N6	20_dpr14_gal4_uas_stop_Trpa1_FruFLP14		Attempted copulation	14	0	600
TrpB7_F2	20_dpr14_gal4_uas_stop_Trpa1_FruFLP15		Attempted copulation	4	0	600
TrpB7_D2	20_dpr14_gal4_uas_stop_Trpa1_FruFLP2		Attempted copulation	2	0	332.2
TrpB7_L6	20_dpr14_gal4_uas_stop_Trpa1_FruFLP4		Attempted copulation	3	0	600
TrpB7_Q9	20_dpr14_gal4_uas_stop_Trpa1_FruFLP5		Attempted copulation	1	0	237.73
TrpB7_G8	20_dpr14_gal4_uas_stop_Trpa1_FruFLP8		Attempted copulation	1	0	515.58
TrpB7_G1	20_dpr14_gal4_uas_stop_Trpa1_FruFLP9		Attempted copulation	5	0	600
TrpB6_H8	20_dpr15_gal4_uas_stop_Trpa1_FruFLP12		Attempted copulation	13	0	0:09:25.005000
TrpB6_E6	20_dpr15_gal4_uas_stop_Trpa1_FruFLP14		Attempted copulation	1	0	0:02:03.991000
TrpB6_D2	20_dpr15_gal4_uas_stop_Trpa1_FruFLP15		Attempted copulation	14	0	0:07:59.321000
TrpB6_F6	20_dpr15_gal4_uas_stop_Trpa1_FruFLP16		Attempted copulation	7	0	0:04:12.198000
TrpB4_F1	20_Dpr15_gal4_uas_stop_Trpa1_FruFLP3		Attempted copulation	3	0	0:01:06.540000
TrpB4_D2	20_Dpr15_gal4_uas_stop_Trpa1_FruFLP4		Attempted copulation	11	0	0:10:00.127000
TrpB4_A9	20_Dpr15_gal4_uas_stop_Trpa1_FruFLP5		Attempted copulation	2	0	0:03:38.527000
TrpB5_G8	20_dpr15_gal4_uas_stop_Trpa1_FruFLP6		Attempted copulation	1	0	0:03:43.960000
TrpB6_D7	20_dpr15_gal4_uas_stop_Trpa1_FruFLP7		Attempted copulation	1	0	0:05:48.506000
TrpB6_E7	20_dpr15_gal4_uas_stop_Trpa1_FruFLP8		Attempted copulation	16	0	0:10:00.197000
TrpB6_C2	20_dpr15_gal4_uas_stop_Trpa1_FruFLP9		Attempted copulation	17	0	0:06:35.971000
TrpB1_N5	20_dpr16_gal4_uas_stop_Trpa1_FruFLP1		Attempted copulation	6	0	0:03:58.853000
TrpB2_P5	20_dpr16_gal4_uas_stop_Trpa1_FruFLP10		Attempted copulation	4	0	306.03
TrpB3_F8	20_dpr16_gal4_uas_stop_Trpa1_FruFLP11		Attempted copulation	6	0	0:10:00.116000
TrpB3_E1	20_dpr16_gal4_uas_stop_Trpa1_FruFLP12		Attempted copulation	5	0	0:08:09.062000
TrpB3_H7	20_dpr16_gal4_uas_stop_Trpa1_FruFLP13		Attempted copulation	3	0	0:04:34.410000
TrpB1_H5	20_dpr16_gal4_uas_stop_Trpa1_FruFLP3		Attempted copulation	5	0	0:09:14.944000
TrpB1_D3	20_dpr16_gal4_uas_stop_Trpa1_FruFLP4		Attempted copulation	3	0	0:07:07.372000
TrpB1_E6	20_dpr16_gal4_uas_stop_Trpa1_FruFLP5		Attempted copulation	3	0	0:02:21.744000
TrpB2_K9	20_dpr16_gal4_uas_stop_Trpa1_FruFLP6		Attempted copulation	5	0	162.57
TrpB2_C4	20_dpr16_gal4_uas_stop_Trpa1_FruFLP7		Attempted copulation	3	0	600.17
TrpB2_R8	20_dpr16_gal4_uas_stop_Trpa1_FruFLP8		Attempted copulation	3	0	525.41
TrpB2_M4	20_dpr16_gal4_uas_stop_Trpa1_FruFLP9		Attempted copulation	3	0	291.61
TrpB5_C5	20_dpr17_gal4_uas_stop_Trpa1_FruFLP12		Attempted copulation	1	0	0:01:46.005000
TrpB5_E7	20_dpr17_gal4_uas_stop_Trpa1_FruFLP14		Attempted copulation	1	0	0:03:18.834000
TrpB4_E8	20_Dpr17_gal4_uas_stop_Trpa1_FruFLP2		Attempted copulation	6	0	0:10:00.163000
TrpB4_F6	20_Dpr17_gal4_uas_stop_Trpa1_FruFLP4		Attempted copulation	4	0	0:09:13.355000
TrpB4_E4	20_Dpr17_gal4_uas_stop_Trpa1_FruFLP5		Attempted copulation	3	0	0:02:29.653000
TrpB4_C3	20_Dpr17_gal4_uas_stop_Trpa1_FruFLP6		Attempted copulation	6	0	0:10:00.016000
TrpB4_F7	20_Dpr17_gal4_uas_stop_Trpa1_FruFLP7		Attempted copulation	2	0	0:03:55.908000
TrpB4_B5	20_Dpr17_gal4_uas_stop_Trpa1_FruFLP8		Attempted copulation	4	0	0:10:00.120000
TrpB4_B8	20_Dpr17_gal4_uas_stop_Trpa1_FruFLP9		Attempted copulation	1	0	0:01:12.346000
TrpB7_J8	20_dpr18_gal4_uas_stop_Trpa1_FruFLP10		Attempted copulation	1	0	318.13
TrpB7_J9	20_dpr18_gal4_uas_stop_Trpa1_FruFLP12		Attempted copulation	6	0	600
TrpB7_W2	20_dpr18_gal4_uas_stop_Trpa1_FruFLP14		Attempted copulation	3	0	600
TrpB7_X6	20_dpr18_gal4_uas_stop_Trpa1_FruFLP3		Attempted copulation	1	0	600
TrpB7_D5	20_dpr18_gal4_uas_stop_Trpa1_FruFLP6		Attempted copulation	2	0	402.6
TrpB7_X9	20_dpr18_gal4_uas_stop_Trpa1_FruFLP8		Attempted copulation	2	0	435.67
TrpB5_B1	20_dpr2_gal4_uas_stop_Trpa1_FruFLP1		Attempted copulation	1	0	0:02:37.642000
TrpB6_B5	20_dpr2_gal4_uas_stop_Trpa1_FruFLP10		Attempted copulation	8	0	0:05:28.109000
TrpB6_H7	20_dpr2_gal4_uas_stop_Trpa1_FruFLP11		Attempted copulation	5	0	0:07:20.035000
TrpB6_C8	20_dpr2_gal4_uas_stop_Trpa1_FruFLP12		Attempted copulation	2	0	0:04:17.791000
TrpB6_B8	20_dpr2_gal4_uas_stop_Trpa1_FruFLP13		Attempted copulation	2	0	0:06:30.872000
TrpB6_G6	20_dpr2_gal4_uas_stop_Trpa1_FruFLP14		Attempted copulation	1	0	0:03:00.309000
TrpB6_E3	20_dpr2_gal4_uas_stop_Trpa1_FruFLP15		Attempted copulation	2	0	0:06:12.106000
TrpB5_G5	20_dpr2_gal4_uas_stop_Trpa1_FruFLP3		Attempted copulation	5	0	0:04:34.912000
TrpB5_E9	20_dpr2_gal4_uas_stop_Trpa1_FruFLP4		Attempted copulation	5	0	0:03:43.653000
TrpB5_D1	20_dpr2_gal4_uas_stop_Trpa1_FruFLP5		Attempted copulation	5	0	0:08:57.694000
TrpB6_F4	20_dpr2_gal4_uas_stop_Trpa1_FruFLP6		Attempted copulation	1	0	0:10:00.100000
TrpB6_E4	20_dpr2_gal4_uas_stop_Trpa1_FruFLP7		Attempted copulation	1	0	0:01:26.047000
TrpB6_A2	20_dpr2_gal4_uas_stop_Trpa1_FruFLP9		Attempted copulation	2	0	0:01:02.602000
TrpB1_J6	20_dpr3_gal4_uas_stop_Trpa1_FruFLP1		Attempted copulation	1	0	0:01:40.525000
TrpB2_R7	20_dpr3_gal4_uas_stop_Trpa1_FruFLP10		Attempted copulation	1	0	56.57
TrpB3_C8	20_dpr3_gal4_uas_stop_Trpa1_FruFLP12		Attempted copulation	3	0	0:10:00.067000
TrpB3_N9	20_dpr3_gal4_uas_stop_Trpa1_FruFLP13		Attempted copulation	3	0	0:02:43.671000
TrpB3_J9	20_dpr3_gal4_uas_stop_Trpa1_FruFLP15		Attempted copulation	13	0	0:10:00.030000
TrpB1_N7	20_dpr3_gal4_uas_stop_Trpa1_FruFLP2		Attempted copulation	1	0	0:00:59.592000
TrpB1_G4	20_dpr3_gal4_uas_stop_Trpa1_FruFLP3		Attempted copulation	3	0	0:01:19.087000
TrpB1_D8	20_dpr3_gal4_uas_stop_Trpa1_FruFLP4		Attempted copulation	1	0	0:01:28.307000
TrpB1_L1	20_dpr3_gal4_uas_stop_Trpa1_FruFLP5		Attempted copulation	2	0	0:10:00.158000
TrpB2_N5	20_dpr3_gal4_uas_stop_Trpa1_FruFLP6		Attempted copulation	3	0	302.97
TrpB2_G4	20_dpr3_gal4_uas_stop_Trpa1_FruFLP7		Attempted copulation	1	0	259.48
TrpB2_N7	20_dpr3_gal4_uas_stop_Trpa1_FruFLP8		Attempted copulation	2	0	600.12
TrpB2_R4	20_dpr3_gal4_uas_stop_Trpa1_FruFLP9		Attempted copulation	10	0	261.05
TrpB7_B9	20_dpr4_gal4_uas_stop_Trpa1_FruFLP1		Attempted copulation	12	0	600
TrpB7_J4	20_dpr4_gal4_uas_stop_Trpa1_FruFLP10		Attempted copulation	19	0	600
TrpB7_S8	20_dpr4_gal4_uas_stop_Trpa1_FruFLP11		Attempted copulation	3	0	600
TrpB7_T7	20_dpr4_gal4_uas_stop_Trpa1_FruFLP14		Attempted copulation	13	0	600
TrpB7_E5	20_dpr4_gal4_uas_stop_Trpa1_FruFLP15		Attempted copulation	1	0	139.37
TrpB7_O1	20_dpr4_gal4_uas_stop_Trpa1_FruFLP2		Attempted copulation	17	0	600
TrpB7_E9	20_dpr4_gal4_uas_stop_Trpa1_FruFLP3		Attempted copulation	6	0	594.86
TrpB7_H4	20_dpr4_gal4_uas_stop_Trpa1_FruFLP4		Attempted copulation	3	0	290.78
TrpB7_P7	20_dpr4_gal4_uas_stop_Trpa1_FruFLP5		Attempted copulation	4	0	600
TrpB7_B7	20_dpr4_gal4_uas_stop_Trpa1_FruFLP6		Attempted copulation	4	0	600
TrpB7_W4	20_dpr4_gal4_uas_stop_Trpa1_FruFLP7		Attempted copulation	2	0	600
TrpB7_V6	20_dpr4_gal4_uas_stop_Trpa1_FruFLP8		Attempted copulation	17	0	600
TrpB7_A7	20_dpr4_gal4_uas_stop_Trpa1_FruFLP9		Attempted copulation	8	0	600
TrpB1_H1	20_dpr5_gal4_uas_stop_Trpa1_FruFLP1		Attempted copulation	3	0	0:05:48.731000
TrpB2_O6	20_dpr5_gal4_uas_stop_Trpa1_FruFLP10		Attempted copulation	1	0	198.56
TrpB3_A8	20_dpr5_gal4_uas_stop_Trpa1_FruFLP11		Attempted copulation	1	0	0:02:01.795000
TrpB3_K3	20_dpr5_gal4_uas_stop_Trpa1_FruFLP13		Attempted copulation	4	0	0:06:26.497000
TrpB3_F6	20_dpr5_gal4_uas_stop_Trpa1_FruFLP14		Attempted copulation	8	0	0:06:40.397000
TrpB1_C8	20_dpr5_gal4_uas_stop_Trpa1_FruFLP2		Attempted copulation	4	0	0:05:40.825000
TrpB1_M3	20_dpr5_gal4_uas_stop_Trpa1_FruFLP4		Attempted copulation	3	0	0:08:13.837000
TrpB1_A6	20_dpr5_gal4_uas_stop_Trpa1_FruFLP5		Attempted copulation	1	0	0:04:03.146000
TrpB2_N2	20_dpr5_gal4_uas_stop_Trpa1_FruFLP7		Attempted copulation	1	0	97.95
TrpB2_E2	20_dpr5_gal4_uas_stop_Trpa1_FruFLP9		Attempted copulation	1	0	181.83
TrpB7_C3	20_dpr6_gal4_uas_stop_Trpa1_FruFLP1		Attempted copulation	5	0	451.34
TrpB7_P9	20_dpr6_gal4_uas_stop_Trpa1_FruFLP10		Attempted copulation	7	0	600
TrpB7_M5	20_dpr6_gal4_uas_stop_Trpa1_FruFLP11		Attempted copulation	18	0	600
TrpB7_G6	20_dpr6_gal4_uas_stop_Trpa1_FruFLP12		Attempted copulation	3	0	157.97
TrpB7_N4	20_dpr6_gal4_uas_stop_Trpa1_FruFLP13		Attempted copulation	3	0	317.72
TrpB7_O4	20_dpr6_gal4_uas_stop_Trpa1_FruFLP14		Attempted copulation	2	0	502.26
TrpB7_S9	20_dpr6_gal4_uas_stop_Trpa1_FruFLP15		Attempted copulation	2	0	600
TrpB7_R1	20_dpr6_gal4_uas_stop_Trpa1_FruFLP2		Attempted copulation	1	0	78.37
TrpB7_O9	20_dpr6_gal4_uas_stop_Trpa1_FruFLP3		Attempted copulation	4	0	225.68
TrpB7_C6	20_dpr6_gal4_uas_stop_Trpa1_FruFLP4		Attempted copulation	1	0	586.7
TrpB7_L9	20_dpr6_gal4_uas_stop_Trpa1_FruFLP5		Attempted copulation	5	0	315.63
TrpB7_X2	20_dpr6_gal4_uas_stop_Trpa1_FruFLP6		Attempted copulation	2	0	600
TrpB7_U7	20_dpr6_gal4_uas_stop_Trpa1_FruFLP7		Attempted copulation	2	0	344.07
TrpB7_R4	20_dpr6_gal4_uas_stop_Trpa1_FruFLP8		Attempted copulation	1	0	241.27
TrpB7_O3	20_dpr6_gal4_uas_stop_Trpa1_FruFLP9		Attempted copulation	3	0	382.79
TrpB5_F7	20_dpr8_gal4_uas_stop_Trpa1_FruFLP1		Attempted copulation	2	0	0:10:00.126000
TrpB6_G2	20_dpr8_gal4_uas_stop_Trpa1_FruFLP10		Attempted copulation	8	0	0:07:00.834000
TrpB6_C1	20_dpr8_gal4_uas_stop_Trpa1_FruFLP11		Attempted copulation	5	0	0:10:00.086000
TrpB6_C7	20_dpr8_gal4_uas_stop_Trpa1_FruFLP12		Attempted copulation	1	0	0:01:31.943000
TrpB6_H6	20_dpr8_gal4_uas_stop_Trpa1_FruFLP13		Attempted copulation	2	0	0:04:39.501000
TrpB6_B9	20_dpr8_gal4_uas_stop_Trpa1_FruFLP14		Attempted copulation	2	0	0:02:39.161000
TrpB5_C7	20_dpr8_gal4_uas_stop_Trpa1_FruFLP2		Attempted copulation	3	0	0:08:46.703000
TrpB5_E1	20_dpr8_gal4_uas_stop_Trpa1_FruFLP3		Attempted copulation	1	0	0:02:08.010000
TrpB6_B2	20_dpr8_gal4_uas_stop_Trpa1_FruFLP4		Attempted copulation	7	0	0:02:02.705000
TrpB6_G1	20_dpr8_gal4_uas_stop_Trpa1_FruFLP5		Attempted copulation	8	0	0:05:31.370000
TrpB6_H2	20_dpr8_gal4_uas_stop_Trpa1_FruFLP6		Attempted copulation	4	0	0:02:54.286000
TrpB6_A8	20_dpr8_gal4_uas_stop_Trpa1_FruFLP7		Attempted copulation	3	0	0:04:54.848000
TrpB6_D5	20_dpr8_gal4_uas_stop_Trpa1_FruFLP8		Attempted copulation	7	0	0:09:05.714000
TrpB6_D4	20_dpr8_gal4_uas_stop_Trpa1_FruFLP9		Attempted copulation	2	0	0:02:58.170000
TrpB5_G7	20_dpr9_gal4_uas_stop_Trpa1_FruFLP1		Attempted copulation	2	0	0:03:30.858000
TrpB6_J2	20_dpr9_gal4_uas_stop_Trpa1_FruFLP10		Attempted copulation	4	0	0:10:00.110000
TrpB6_C5	20_dpr9_gal4_uas_stop_Trpa1_FruFLP11		Attempted copulation	2	0	0:07:40.873000
TrpB6_G7	20_dpr9_gal4_uas_stop_Trpa1_FruFLP14		Attempted copulation	13	0	0:10:00.102000
TrpB6_E2	20_dpr9_gal4_uas_stop_Trpa1_FruFLP15		Attempted copulation	2	0	0:10:00.116000
TrpB5_G9	20_dpr9_gal4_uas_stop_Trpa1_FruFLP2		Attempted copulation	8	0	0:09:44.660000
TrpB5_A8	20_dpr9_gal4_uas_stop_Trpa1_FruFLP3		Attempted copulation	3	0	0:05:00.717000
TrpB5_F2	20_dpr9_gal4_uas_stop_Trpa1_FruFLP4		Attempted copulation	3	0	0:06:32.876000
TrpB5_B4	20_dpr9_gal4_uas_stop_Trpa1_FruFLP5		Attempted copulation	2	0	0:01:19.291000
TrpB5_A9	20_dpr9_gal4_uas_stop_Trpa1_FruFLP6		Attempted copulation	3	0	0:03:29.814000
TrpB5_B9	20_dpr9_gal4_uas_stop_Trpa1_FruFLP7		Attempted copulation	1	0	0:10:00.007000
TrpB5_A1	20_dpr9_gal4_uas_stop_Trpa1_FruFLP8		Attempted copulation	1	0	0:07:12.847000
TrpB5_A6	20_dpr9_gal4_uas_stop_Trpa1_FruFLP9		Attempted copulation	4	0	0:10:00.062000
TrpB7_O5	20_FruFLP_1		Attempted copulation	4	0	207.89
TrpB7_Q6	20_FruFLP_10		Attempted copulation	5	0	347.64
TrpB7_U6	20_FruFLP_11		Attempted copulation	1	0	528.27
TrpB7_S2	20_FruFLP_12		Attempted copulation	2	0	312.26
TrpB7_V8	20_FruFLP_13		Attempted copulation	5	0	174.17
TrpB7_H2	20_FruFLP_14		Attempted copulation	2	0	600
TrpB7_X8	20_FruFLP_15		Attempted copulation	6	0	196.99
TrpB7_X1	20_FruFLP_2		Attempted copulation	3	0	460.5
TrpB7_J1	20_FruFLP_4		Attempted copulation	3	0	408.69
TrpB7_O6	20_FruFLP_5		Attempted copulation	1	0	134.76
TrpB7_C4	20_FruFLP_6		Attempted copulation	3	0	75.71
TrpB7_C5	20_FruFLP_7		Attempted copulation	14	0	394.49
TrpB7_T8	20_FruFLP_8		Attempted copulation	5	0	319.6
TrpB7_H3	20_FruFLP_9		Attempted copulation	5	0	113.87
TrpB4_A8	20_noGAL4_TrpA1_1		Attempted copulation	1	0	0:10:00.051000
TrpB4_F4	20_noGAL4_TrpA1_10		Attempted copulation	12	0	0:10:00.088000
TrpB4_A4	20_noGAL4_TrpA1_11		Attempted copulation	10	0	0:04:50.862000
TrpB4_D8	20_noGAL4_TrpA1_12		Attempted copulation	2	0	0:03:57.577000
TrpB4_C1	20_noGAL4_TrpA1_13		Attempted copulation	1	0	0:01:30.308000
TrpB4_D9	20_noGAL4_TrpA1_14		Attempted copulation	1	0	0:02:03.930000
TrpB4_E3	20_noGAL4_TrpA1_15		Attempted copulation	3	0	0:08:12.598000
TrpB4_A1	20_noGAL4_TrpA1_2		Attempted copulation	12	0	0:06:19.142000
TrpB4_D5	20_noGAL4_TrpA1_3		Attempted copulation	20	0	0:10:00.048000
TrpB4_C6	20_noGAL4_TrpA1_4		Attempted copulation	9	0	0:10:00.111000
TrpB4_E6	20_noGAL4_TrpA1_5		Attempted copulation	8	0	0:10:00.188000
TrpB4_A2	20_noGAL4_TrpA1_6		Attempted copulation	7	0	0:08:32.129000
TrpB4_E5	20_noGAL4_TrpA1_7		Attempted copulation	11	0	0:10:00.018000
TrpB4_C7	20_noGAL4_TrpA1_8		Attempted copulation	2	0	0:04:07.656000
TrpB7_W5	20_TrpA1_1		Attempted copulation	5	0	273.25
TrpB7_T4	20_TrpA1_10		Attempted copulation	5	0	600
TrpB7_F9	20_TrpA1_11		Attempted copulation	4	0	100.01
TrpB7_P5	20_TrpA1_12		Attempted copulation	26	0	600
TrpB7_N5	20_TrpA1_13		Attempted copulation	4	0	138.84
TrpB7_U8	20_TrpA1_14		Attempted copulation	12	0	435.81
TrpB7_C2	20_TrpA1_15		Attempted copulation	5	0	478.47
TrpB7_V2	20_TrpA1_2		Attempted copulation	6	0	294.92
TrpB7_U3	20_TrpA1_3		Attempted copulation	3	0	348.44
TrpB7_H1	20_TrpA1_5		Attempted copulation	2	0	266.21
TrpB7_M8	20_TrpA1_6		Attempted copulation	2	0	363.12
TrpB7_D8	20_TrpA1_7		Attempted copulation	5	0	219.14
TrpB7_K2	20_TrpA1_8		Attempted copulation	3	0	293.82
TrpB7_W7	20_TrpA1_9		Attempted copulation	7	0	323.8
TrpB7_A4	30_CSxwCS_1		Attempted copulation	5	0	600
TrpB7_L5	30_CSxwCS_10		Attempted copulation	1	0	600
TrpB7_W8	30_CSxwCS_13		Attempted copulation	1	0	600
TrpB7_M4	30_CSxwCS_14		Attempted copulation	4	0	600
TrpB7_A5	30_CSxwCS_15		Attempted copulation	6	0	600
TrpB7_L8	30_CSxwCS_2		Attempted copulation	2	0	600
TrpB7_M6	30_CSxwCS_3		Attempted copulation	5	0	600
TrpB7_L3	30_CSxwCS_4		Attempted copulation	12	0	600
TrpB7_B8	30_CSxwCS_5		Attempted copulation	5	0	600
TrpB7_U9	30_CSxwCS_6		Attempted copulation	1	0	600
TrpB7_M9	30_CSxwCS_7		Attempted copulation	5	0	600
TrpB7_G5	30_CSxwCS_9		Attempted copulation	5	0	600
TrpB3_G6	30_DIPalpha_gal4_uas_stop_Trpa1_FruFLP13		Attempted copulation	1	0	0:10:00.089000
TrpB2_G6	30_DIPalpha_gal4_uas_stop_Trpa1_FruFLP9		Attempted copulation	1	0	600.1
TrpB2_H2	30_DIPbeta_gal4_uas_stop_Trpa1_FruFLP10		Attempted copulation	1	0	600.14
TrpB3_N8	30_DIPbeta_gal4_uas_stop_Trpa1_FruFLP11		Attempted copulation	8	0	0:10:00.153000
TrpB3_M6	30_DIPbeta_gal4_uas_stop_Trpa1_FruFLP15		Attempted copulation	1	0	0:10:00.112000
TrpB1_L5	30_DIPbeta_gal4_uas_stop_Trpa1_FruFLP2		Attempted copulation	1	0	0:10:00.092000
TrpB1_A9	30_DIPbeta_gal4_uas_stop_Trpa1_FruFLP3		Attempted copulation	12	0	0:10:00.026000
TrpB1_B8	30_DIPbeta_gal4_uas_stop_Trpa1_FruFLP4		Attempted copulation	3	0	0:10:00.009000
TrpB1_O8	30_DIPbeta_gal4_uas_stop_Trpa1_FruFLP5		Attempted copulation	3	0	0:10:00.131000
TrpB2_F3	30_DIPbeta_gal4_uas_stop_Trpa1_FruFLP6		Attempted copulation	6	0	547.23
TrpB2_F2	30_DIPbeta_gal4_uas_stop_Trpa1_FruFLP7		Attempted copulation	4	0	600.11
TrpB1_K5	30_DIPdelta_gal4_uas_stop_Trpa1_FruFLP1		Attempted copulation	15	0	0:10:00.078000
TrpB2_H4	30_DIPdelta_gal4_uas_stop_Trpa1_FruFLP10		Attempted copulation	2	0	600.1
TrPB3_N2	30_DIPdelta_gal4_uas_stop_Trpa1_FruFLP11		Attempted copulation	6	0	0:03:21.956000
TrpB3_A3	30_DIPdelta_gal4_uas_stop_Trpa1_FruFLP12		Attempted copulation	20	0	0:10:00.098000
TrpB3_J4	30_DIPdelta_gal4_uas_stop_Trpa1_FruFLP13		Attempted copulation	2	0	0:10:00.164000
TrpB3_O4	30_DIPdelta_gal4_uas_stop_Trpa1_FruFLP14		Attempted copulation	3	0	0:10:00.104000
TrpB3_F1	30_DIPdelta_gal4_uas_stop_Trpa1_FruFLP15		Attempted copulation	5	0	0:02:24.596000
TrpB1_A2	30_DIPdelta_gal4_uas_stop_Trpa1_FruFLP2		Attempted copulation	7	0	0:10:00.071000
TrpB1_C7	30_DIPdelta_gal4_uas_stop_Trpa1_FruFLP4		Attempted copulation	5	0	0:04:24.531000
TrpB1_H4	30_DIPdelta_gal4_uas_stop_Trpa1_FruFLP5		Attempted copulation	4	0	0:04:53.359000
TrpB2_E8	30_DIPdelta_gal4_uas_stop_Trpa1_FruFLP6		Attempted copulation	5	0	600.08
TrpB2_N6	30_DIPdelta_gal4_uas_stop_Trpa1_FruFLP7		Attempted copulation	1	0	600.03
TrpB2_J1	30_DIPdelta_gal4_uas_stop_Trpa1_FruFLP8		Attempted copulation	1	0	600
TrpB2_H8	30_DIPdelta_gal4_uas_stop_Trpa1_FruFLP9		Attempted copulation	4	0	160.94
TrpB1_K9	30_DIPepsilon_gal4_uas_stop_Trpa1_FruFLP1		Attempted copulation	7	0	0:05:00.233000
TrpB3_B6	30_DIPepsilon_gal4_uas_stop_Trpa1_FruFLP11		Attempted copulation	5	0	0:05:54.224000
TrpB3_P7	30_DIPepsilon_gal4_uas_stop_Trpa1_FruFLP13		Attempted copulation	3	0	0:02:40.645000
TrpB3_G5	30_DIPepsilon_gal4_uas_stop_Trpa1_FruFLP14		Attempted copulation	1	0	0:10:00.174000
TrpB1_R9	30_DIPepsilon_gal4_uas_stop_Trpa1_FruFLP4		Attempted copulation	1	0	0:03:17.425000
TrpB1_S3	30_DIPepsilon_gal4_uas_stop_Trpa1_FruFLP5		Attempted copulation	18	0	0:10:00.101000
TrpB2_G7	30_DIPepsilon_gal4_uas_stop_Trpa1_FruFLP6		Attempted copulation	3	0	600.09
TrpB2_E5	30_DIPepsilon_gal4_uas_stop_Trpa1_FruFLP7		Attempted copulation	1	0	600.33
TrpB2_O9	30_DIPepsilon_gal4_uas_stop_Trpa1_FruFLP9		Attempted copulation	11	0	600.13
TrpB1_R4	30_DIPeta_gal4_uas_stop_Trpa1_FruFLP1		Attempted copulation	6	0	0:10:00.181000
TrpB2_J7	30_DIPeta_gal4_uas_stop_Trpa1_FruFLP10		Attempted copulation	3	0	600.06
TrpB3_C3	30_DIPeta_gal4_uas_stop_Trpa1_FruFLP11		Attempted copulation	2	0	0:03:53.222000
TrpB3_K5	30_DIPeta_gal4_uas_stop_Trpa1_FruFLP12		Attempted copulation	4	0	0:10:00.172000
TrpB3_L8	30_DIPeta_gal4_uas_stop_Trpa1_FruFLP13		Attempted copulation	15	0	0:10:00.110000
TrpB3_P4	30_DIPeta_gal4_uas_stop_Trpa1_FruFLP14		Attempted copulation	7	0	0:10:00.198000
TrpB1_P5	30_DIPeta_gal4_uas_stop_Trpa1_FruFLP2		Attempted copulation	4	0	0:10:00.096000
TrpB1_N9	30_DIPeta_gal4_uas_stop_Trpa1_FruFLP4		Attempted copulation	3	0	0:08:52.361000
TrpB1_E1	30_DIPeta_gal4_uas_stop_Trpa1_FruFLP5		Attempted copulation	2	0	0:07:33.188000
TrpB2_K4	30_DIPeta_gal4_uas_stop_Trpa1_FruFLP6		Attempted copulation	3	0	583.68
TrpB2_N1	30_DIPeta_gal4_uas_stop_Trpa1_FruFLP7		Attempted copulation	16	0	600.08
TrpB2_M6	30_DIPeta_gal4_uas_stop_Trpa1_FruFLP8		Attempted copulation	11	0	600.1
TrpB2_D9	30_DIPeta_gal4_uas_stop_Trpa1_FruFLP9		Attempted copulation	26	0	600.03
TrpB1_G5	30_DIPgamma_gal4_uas_stop_Trpa1_FruFLP1		Attempted copulation	1	0	0:10:00.119000
TrpB2_D4	30_DIPgamma_gal4_uas_stop_Trpa1_FruFLP10		Attempted copulation	2	0	600.04
TrpB3_K8	30_DIPgamma_gal4_uas_stop_Trpa1_FruFLP11		Attempted copulation	4	0	0:10:00.160000
TrpB3_G9	30_DIPgamma_gal4_uas_stop_Trpa1_FruFLP12		Attempted copulation	10	0	0:10:00.148000
TrpB3_O7	30_DIPgamma_gal4_uas_stop_Trpa1_FruFLP13		Attempted copulation	11	0	0:10:00.185000
TrpB3_D5	30_DIPgamma_gal4_uas_stop_Trpa1_FruFLP14		Attempted copulation	8	0	0:10:00.127000
TrpB3_G3	30_DIPgamma_gal4_uas_stop_Trpa1_FruFLP15		Attempted copulation	8	0	0:10:00.173000
TrpB1_B9	30_DIPgamma_gal4_uas_stop_Trpa1_FruFLP2		Attempted copulation	6	0	0:10:00.080000
TrpB1_J5	30_DIPgamma_gal4_uas_stop_Trpa1_FruFLP3		Attempted copulation	5	0	0:10:00.045000
TrpB1_D9	30_DIPgamma_gal4_uas_stop_Trpa1_FruFLP4		Attempted copulation	12	0	0:10:00.079000
TrpB1_M7	30_DIPgamma_gal4_uas_stop_Trpa1_FruFLP5		Attempted copulation	4	0	0:10:00.145000
TrpB2_D2	30_DIPgamma_gal4_uas_stop_Trpa1_FruFLP6		Attempted copulation	11	0	600.1
TrpB2_J5	30_DIPgamma_gal4_uas_stop_Trpa1_FruFLP7		Attempted copulation	16	0	600.03
TrpB2_L7	30_DIPgamma_gal4_uas_stop_Trpa1_FruFLP8		Attempted copulation	12	0	600.18
TrpB2_O2	30_DIPgamma_gal4_uas_stop_Trpa1_FruFLP9		Attempted copulation	9	0	600.08
TrpB6_D8	30_dipTheta_gal4_uas_stop_TrpA1_ FruFLP14		Attempted copulation	1	0	0:10:00.060000
TrpB5_B6	30_dipTheta_gal4_uas_stop_TrpA1_FruFLP1		Attempted copulation	7	0	0:10:00.196000
TrpB5_C2	30_dipTheta_gal4_uas_stop_TrpA1_FruFLP11		Attempted copulation	4	0	0:10:00.146000
TrpB5_H8	30_dipTheta_gal4_uas_stop_TrpA1_FruFLP12		Attempted copulation	8	0	0:10:00.136000
TrpB5_E6	30_dipTheta_gal4_uas_stop_TrpA1_FruFLP13		Attempted copulation	7	0	0:10:00.013000
TrpB5_F6	30_dipTheta_gal4_uas_stop_TrpA1_FruFLP2		Attempted copulation	4	0	0:10:00.119000
TrpB5_F5	30_dipTheta_gal4_uas_stop_TrpA1_FruFLP3		Attempted copulation	5	0	0:10:00.163000
TrpB5_H9	30_dipTheta_gal4_uas_stop_TrpA1_FruFLP4		Attempted copulation	1	0	0:10:00.136000
TrpB5_A4	30_dipTheta_gal4_uas_stop_TrpA1_FruFLP5		Attempted copulation	5	0	0:10:00.141000
TrpB5_B3	30_dipTheta_gal4_uas_stop_TrpA1_FruFLP6		Attempted copulation	6	0	0:10:00.072000
TrpB5_F8	30_dipTheta_gal4_uas_stop_TrpA1_FruFLP8		Attempted copulation	1	0	0:10:00.113000
TrpB5_D5	30_dipTheta_gal4_uas_stop_TrpA1_FruFLP9		Attempted copulation	2	0	0:10:00.155000
TrpB2_A7	30_DIPzeta_gal4_uas_stop_Trpa1_FruFLP10		Attempted copulation	6	0	600.15
TrpB3_N1	30_DIPzeta_gal4_uas_stop_Trpa1_FruFLP11		Attempted copulation	13	0	0:10:00.044000
TrpB3_O3	30_DIPzeta_gal4_uas_stop_Trpa1_FruFLP12		Attempted copulation	27	0	0:10:00.035000
TrpB3_F3	30_DIPzeta_gal4_uas_stop_Trpa1_FruFLP13		Attempted copulation	15	0	0:06:37.559000
TrpB3_H6	30_DIPzeta_gal4_uas_stop_Trpa1_FruFLP14		Attempted copulation	12	0	0:10:00.004000
TrpB3_S6	30_DIPzeta_gal4_uas_stop_Trpa1_FruFLP15		Attempted copulation	10	0	0:10:00.132000
TrpB1_L6	30_DIPzeta_gal4_uas_stop_Trpa1_FruFLP3		Attempted copulation	7	0	0:10:00.081000
TrpB1_J7	30_DIPzeta_gal4_uas_stop_Trpa1_FruFLP5		Attempted copulation	4	0	0:02:15.929000
TrpB2_F4	30_DIPzeta_gal4_uas_stop_Trpa1_FruFLP6		Attempted copulation	1	0	600.16
TrpB2_P8	30_DIPzeta_gal4_uas_stop_Trpa1_FruFLP7		Attempted copulation	5	0	600.02
TrpB2_A8	30_DIPzeta_gal4_uas_stop_Trpa1_FruFLP8		Attempted copulation	1	0	600.03
TrpB2_L5	30_DIPzeta_gal4_uas_stop_Trpa1_FruFLP9		Attempted copulation	3	0	600.04
TrpB1_M1	30_dpr1_gal4_uas_stop_Trpa1_FruFLP1		Attempted copulation	22	0	0:10:00.145000
TrpB2_A2	30_dpr1_gal4_uas_stop_Trpa1_FruFLP10		Attempted copulation	3	0	166.94
TrpB3_F4	30_dpr1_gal4_uas_stop_Trpa1_FruFLP11		Attempted copulation	7	0	0:06:44.565000
TrpB3_H1	30_dpr1_gal4_uas_stop_Trpa1_FruFLP12		Attempted copulation	1	0	0:10:00.086000
TrpB3_A9	30_dpr1_gal4_uas_stop_Trpa1_FruFLP13		Attempted copulation	1	0	0:10:00.095000
TrpB3_R9	30_dpr1_gal4_uas_stop_Trpa1_FruFLP15		Attempted copulation	12	0	0:10:00.077000
TrpB1_O1	30_dpr1_gal4_uas_stop_Trpa1_FruFLP2		Attempted copulation	30	0	0:10:00.197000
TrpB1_C9	30_dpr1_gal4_uas_stop_Trpa1_FruFLP3		Attempted copulation	21	0	0:10:00.322000
TrpB1_N2	30_dpr1_gal4_uas_stop_Trpa1_FruFLP5		Attempted copulation	4	0	0:10:00.078000
TrpB2_F5	30_dpr1_gal4_uas_stop_Trpa1_FruFLP7		Attempted copulation	2	0	600.19
TrpB2_M5	30_dpr1_gal4_uas_stop_Trpa1_FruFLP8		Attempted copulation	4	0	600.05
TrpB1_K1	30_dpr10_gal4_uas_stop_Trpa1_FruFLP1		Attempted copulation	1	0	0:10:00.188000
TrpB3_H4	30_dpr10_gal4_uas_stop_Trpa1_FruFLP11		Attempted copulation	18	0	0:10:00.083000
TrpB3_J8	30_dpr10_gal4_uas_stop_Trpa1_FruFLP12		Attempted copulation	6	0	0:10:00.079000
TrpB3_B5	30_dpr10_gal4_uas_stop_Trpa1_FruFLP13		Attempted copulation	2	0	0:10:00.107000
TrpB3_M1	30_dpr10_gal4_uas_stop_Trpa1_FruFLP14		Attempted copulation	3	0	0:10:00.183000
TrpB3_B3	30_dpr10_gal4_uas_stop_Trpa1_FruFLP15		Attempted copulation	7	0	0:10:00.114000
TrpB1_R1	30_dpr10_gal4_uas_stop_Trpa1_FruFLP3		Attempted copulation	3	0	0:10:00.009000
TrpB1_N8	30_dpr10_gal4_uas_stop_Trpa1_FruFLP4		Attempted copulation	2	0	0:10:00.125000
TrpB2_S2	30_dpr10_gal4_uas_stop_Trpa1_FruFLP9		Attempted copulation	3	0	600.19
TrpB1_L7	30_dpr11_gal4_uas_stop_Trpa1_FruFLP1		Attempted copulation	10	0	0:10:00.181000
TrpB2_K2	30_dpr11_gal4_uas_stop_Trpa1_FruFLP10		Attempted copulation	20	0	600.02
TrpB3_R2	30_dpr11_gal4_uas_stop_Trpa1_FruFLP11		Attempted copulation	3	0	0:10:00.025000
TrpB3_P9	30_dpr11_gal4_uas_stop_Trpa1_FruFLP12		Attempted copulation	14	0	0:10:00.125000
TrpB3_N6	30_dpr11_gal4_uas_stop_Trpa1_FruFLP13		Attempted copulation	8	0	0:10:00.041000
TrpB3_R4	30_dpr11_gal4_uas_stop_Trpa1_FruFLP14		Attempted copulation	10	0	0:10:00.091000
TrpB3_R5	30_dpr11_gal4_uas_stop_Trpa1_FruFLP15		Attempted copulation	5	0	0:10:00.121000
TrpB1_F1	30_dpr11_gal4_uas_stop_Trpa1_FruFLP2		Attempted copulation	9	0	0:10:00.073000
TrpB1_B5	30_dpr11_gal4_uas_stop_Trpa1_FruFLP3		Attempted copulation	24	0	0:10:00.123000
TrpB1_M5	30_dpr11_gal4_uas_stop_Trpa1_FruFLP4		Attempted copulation	3	0	0:10:00.127000
TrpB1_M9	30_dpr11_gal4_uas_stop_Trpa1_FruFLP5		Attempted copulation	14	0	0:10:00.067000
TrpB2_P9	30_dpr11_gal4_uas_stop_Trpa1_FruFLP7		Attempted copulation	5	0	600.06
TrpB2_J8	30_dpr11_gal4_uas_stop_Trpa1_FruFLP8		Attempted copulation	5	0	600.01
TrpB2_K7	30_dpr11_gal4_uas_stop_Trpa1_FruFLP9		Attempted copulation	1	0	600.08
TrpB2_E1	30_dpr12_gal4_uas_stop_Trpa1_FruFLP10		Attempted copulation	1	0	600.09
TrpB3_P1	30_dpr12_gal4_uas_stop_Trpa1_FruFLP14		Attempted copulation	1	0	0:10:00.109000
TrpB1_A1	30_dpr12_gal4_uas_stop_Trpa1_FruFLP2		Attempted copulation	21	0	0:10:00.016000
TrpB1_G8	30_dpr12_gal4_uas_stop_Trpa1_FruFLP3		Attempted copulation	2	0	0:10:00.193000
TrpB2_P3	30_dpr12_gal4_uas_stop_Trpa1_FruFLP6		Attempted copulation	9	0	600.07
TrpB2_C1	30_dpr12_gal4_uas_stop_Trpa1_FruFLP9		Attempted copulation	2	0	600
TrpB7_R6	30_dpr14_gal4_uas_stop_TrpA1_ FruFLP1		Attempted copulation	2	0	600
TrpB7_S5	30_dpr14_gal4_uas_stop_TrpA1_ FruFLP10		Attempted copulation	11	0	600
TrpB7_L1	30_dpr14_gal4_uas_stop_TrpA1_ FruFLP11		Attempted copulation	2	0	600
TrpB7_W9	30_dpr14_gal4_uas_stop_TrpA1_ FruFLP12		Attempted copulation	1	0	600
TrpB7_H9	30_dpr14_gal4_uas_stop_TrpA1_ FruFLP13		Attempted copulation	12	0	600
TrpB7_O8	30_dpr14_gal4_uas_stop_TrpA1_ FruFLP14		Attempted copulation	9	0	600
TrpB7_H6	30_dpr14_gal4_uas_stop_TrpA1_ FruFLP15		Attempted copulation	1	0	600
TrpB7_D4	30_dpr14_gal4_uas_stop_TrpA1_ FruFLP2		Attempted copulation	5	0	600
TrpB7_G3	30_dpr14_gal4_uas_stop_TrpA1_ FruFLP3		Attempted copulation	7	0	600
TrpB7_G2	30_dpr14_gal4_uas_stop_TrpA1_ FruFLP4		Attempted copulation	11	0	600
TrpB7_U2	30_dpr14_gal4_uas_stop_TrpA1_ FruFLP5		Attempted copulation	2	0	600
TrpB7_Y1	30_dpr14_gal4_uas_stop_TrpA1_ FruFLP6		Attempted copulation	3	0	600
TrpB7_D9	30_dpr14_gal4_uas_stop_TrpA1_ FruFLP7		Attempted copulation	1	0	600
TrpB7_Q4	30_dpr14_gal4_uas_stop_TrpA1_ FruFLP9		Attempted copulation	5	0	600
TrpB5_D3	30_dpr15_gal4_uas_stop_TrpA1_6		Attempted copulation	19	0	0:10:00.024000
TrpB5_H6	30_dpr15_gal4_uas_stop_TrpA1_7		Attempted copulation	4	0	0:10:00.124000
TrpB4_A6	30_Dpr15_gal4_uas_stop_Trpa1_FruFLP1		Attempted copulation	30	0	0:10:00.102000
TrpB6_A7	30_dpr15_gal4_uas_stop_Trpa1_FruFLP10		Attempted copulation	5	0	0:10:00.057000
TrpB6_D3	30_dpr15_gal4_uas_stop_Trpa1_FruFLP11		Attempted copulation	1	0	0:10:00.018000
TrpB6_J5	30_dpr15_gal4_uas_stop_Trpa1_FruFLP12		Attempted copulation	5	0	0:10:00.089000
TrpB6_H9	30_dpr15_gal4_uas_stop_Trpa1_FruFLP13		Attempted copulation	11	0	0:10:00.003000
TrpB6_A9	30_dpr15_gal4_uas_stop_Trpa1_FruFLP14		Attempted copulation	7	0	0:10:00.041000
TrpB4_G1	30_Dpr15_gal4_uas_stop_Trpa1_FruFLP2		Attempted copulation	1	0	0:10:00.163000
TrpB4_E7	30_Dpr15_gal4_uas_stop_Trpa1_FruFLP3		Attempted copulation	2	0	0:10:00.177000
TrpB4_C9	30_Dpr15_gal4_uas_stop_Trpa1_FruFLP4		Attempted copulation	2	0	0:10:00.030000
TrpB4_A5	30_Dpr15_gal4_uas_stop_Trpa1_FruFLP5		Attempted copulation	6	0	0:10:00.008000
TrpB6_E9	30_dpr15_gal4_uas_stop_Trpa1_FruFLP8		Attempted copulation	1	0	0:10:00.033000
TrpB3_D8	30_dpr16_gal4_uas_stop_Trpa1_FruFLP11		Attempted copulation	3	0	0:10:00.165000
TrpB3_R6	30_dpr16_gal4_uas_stop_Trpa1_FruFLP12		Attempted copulation	1	0	0:10:00.113000
TrpB1_J1	30_dpr16_gal4_uas_stop_Trpa1_FruFLP2		Attempted copulation	4	0	0:10:00.143000
TrpB1_B7	30_dpr16_gal4_uas_stop_Trpa1_FruFLP3		Attempted copulation	5	0	0:10:00.091000
TrpB1_G7	30_dpr16_gal4_uas_stop_Trpa1_FruFLP4		Attempted copulation	4	0	0:05:02.008000
TrpB1_C3	30_dpr16_gal4_uas_stop_Trpa1_FruFLP5		Attempted copulation	2	0	0:10:00.010000
TrpB2_L1	30_dpr16_gal4_uas_stop_Trpa1_FruFLP6		Attempted copulation	1	0	600.16
TrpB2_L8	30_dpr16_gal4_uas_stop_Trpa1_FruFLP7		Attempted copulation	5	0	600.02
TrpB2_N9	30_dpr16_gal4_uas_stop_Trpa1_FruFLP8		Attempted copulation	5	0	600.19
TrpB4_A7	30_Dpr17_gal4_uas_stop_Trpa1_FruFLP1		Attempted copulation	10	0	0:10:00.151000
TrpB4_D4	30_Dpr17_gal4_uas_stop_Trpa1_FruFLP10		Attempted copulation	7	0	0:10:00.050000
TrpB5_C4	30_dpr17_gal4_uas_stop_TrpA1_FruFLP11		Attempted copulation	1	0	0:10:00.069000
TrpB5_H2	30_dpr17_gal4_uas_stop_TrpA1_FruFLP12		Attempted copulation	1	0	0:08:27.717000
TrpB5_H7	30_dpr17_gal4_uas_stop_TrpA1_FruFLP13		Attempted copulation	5	0	0:10:00.112000
TrpB5_E5	30_dpr17_gal4_uas_stop_TrpA1_FruFLP14		Attempted copulation	3	0	0:10:00.135000
TrpB6_J6	30_dpr17_gal4_uas_stop_Trpa1_FruFLP15		Attempted copulation	8	0	0:10:00.197000
TrpB4_D6	30_Dpr17_gal4_uas_stop_Trpa1_FruFLP2		Attempted copulation	4	0	0:10:00.071000
TrpB4_D3	30_Dpr17_gal4_uas_stop_Trpa1_FruFLP3		Attempted copulation	5	0	0:10:00.169000
TrpB4_E1	30_Dpr17_gal4_uas_stop_Trpa1_FruFLP4		Attempted copulation	1	0	0:10:00.123000
TrpB4_C4	30_Dpr17_gal4_uas_stop_Trpa1_FruFLP6		Attempted copulation	6	0	0:10:00.148000
TrpB7_F8	30_dpr18_gal4_uas_stop_TrpA1_ FruFLP1		Attempted copulation	7	0	600
TrpB7_R8	30_dpr18_gal4_uas_stop_TrpA1_ FruFLP12		Attempted copulation	8	0	600
TrpB7_J2	30_dpr18_gal4_uas_stop_TrpA1_ FruFLP13		Attempted copulation	10	0	600
TrpB7_B5	30_dpr18_gal4_uas_stop_TrpA1_ FruFLP14		Attempted copulation	7	0	600
TrpB7_N1	30_dpr18_gal4_uas_stop_TrpA1_ FruFLP15		Attempted copulation	1	0	600
TrpB7_T9	30_dpr18_gal4_uas_stop_TrpA1_ FruFLP2		Attempted copulation	10	0	600
TrpB7_D1	30_dpr18_gal4_uas_stop_TrpA1_ FruFLP3		Attempted copulation	2	0	600
TrpB7_V5	30_dpr18_gal4_uas_stop_TrpA1_ FruFLP4		Attempted copulation	3	0	600
TrpB7_S1	30_dpr18_gal4_uas_stop_TrpA1_ FruFLP8		Attempted copulation	1	0	600
TrpB7_W6	30_dpr18_gal4_uas_stop_TrpA1_ FruFLP9		Attempted copulation	2	0	600
TrpB6_A6	30_dpr2_gal4_uas_stop_TrpA1_ FruFLP11		Attempted copulation	2	0	0:10:00.101000
TrpB6_A3	30_dpr2_gal4_uas_stop_TrpA1_ FruFLP12		Attempted copulation	17	0	0:10:00.024000
TrpB6_G3	30_dpr2_gal4_uas_stop_TrpA1_ FruFLP13		Attempted copulation	5	0	0:10:00.001000
TrpB6_A5	30_dpr2_gal4_uas_stop_TrpA1_ FruFLP14		Attempted copulation	12	0	0:10:00.151000
TrpB6_G8	30_dpr2_gal4_uas_stop_TrpA1_ FruFLP15		Attempted copulation	2	0	0:10:00.206000
TrpB6_G5	30_dpr2_gal4_uas_stop_TrpA1_ FruFLP7		Attempted copulation	3	0	0:10:00.056000
TrpB6_E1	30_dpr2_gal4_uas_stop_TrpA1_ FruFLP8		Attempted copulation	4	0	0:10:00.130000
TrpB6_A1	30_dpr2_gal4_uas_stop_TrpA1_ FruFLP9		Attempted copulation	12	0	0:10:00.033000
TrpB5_D6	30_dpr2_gal4_uas_stop_TrpA1_FruFLP1		Attempted copulation	3	0	0:10:00.019000
TrpB5_H5	30_dpr2_gal4_uas_stop_TrpA1_FruFLP3		Attempted copulation	4	0	0:10:00.193000
TrpB5_C3	30_dpr2_gal4_uas_stop_TrpA1_FruFLP4		Attempted copulation	9	0	0:10:00.008000
TrpB5_B7	30_dpr2_gal4_uas_stop_TrpA1_FruFLP5		Attempted copulation	4	0	0:10:00.152000
TrpB5_B5	30_dpr2_gal4_uas_stop_TrpA1_FruFLP6		Attempted copulation	1	0	0:10:00.084000
TrpB1_A7	30_dpr3_gal4_uas_stop_Trpa1_FruFLP1		Attempted copulation	4	0	0:10:00.079000
TrpB3_D2	30_dpr3_gal4_uas_stop_Trpa1_FruFLP11		Attempted copulation	1	0	0:10:00.112000
TrpB3_C9	30_dpr3_gal4_uas_stop_Trpa1_FruFLP14		Attempted copulation	3	0	0:01:59.051000
TrpB1_B6	30_dpr3_gal4_uas_stop_Trpa1_FruFLP2		Attempted copulation	2	0	0:09:23.944000
TrpB1_O5	30_dpr3_gal4_uas_stop_Trpa1_FruFLP3		Attempted copulation	6	0	0:10:00.147000
TrpB1_L8	30_dpr3_gal4_uas_stop_Trpa1_FruFLP4		Attempted copulation	3	0	0:10:00.162000
TrpB1_B2	30_dpr3_gal4_uas_stop_Trpa1_FruFLP5		Attempted copulation	1	0	0:10:00.158000
TrpB2_B8	30_dpr3_gal4_uas_stop_Trpa1_FruFLP6		Attempted copulation	1	0	600.06
TrpB2_H5	30_dpr3_gal4_uas_stop_Trpa1_FruFLP8		Attempted copulation	7	0	126.25
TrpB2_O4	30_dpr3_gal4_uas_stop_Trpa1_FruFLP9		Attempted copulation	10	0	600.14
TrpB7_V1	30_dpr4_gal4_uas_stop_TrpA1_ FruFLP1		Attempted copulation	3	0	600
TrpB7_M1	30_dpr4_gal4_uas_stop_TrpA1_ FruFLP11		Attempted copulation	1	0	600
TrpB7_A2	30_dpr4_gal4_uas_stop_TrpA1_ FruFLP12		Attempted copulation	2	0	600
TrpB7_K9	30_dpr4_gal4_uas_stop_TrpA1_ FruFLP14		Attempted copulation	4	0	600
TrpB7_D6	30_dpr4_gal4_uas_stop_TrpA1_ FruFLP2		Attempted copulation	3	0	600
TrpB7_T1	30_dpr4_gal4_uas_stop_TrpA1_ FruFLP3		Attempted copulation	3	0	600
TrpB7_F7	30_dpr4_gal4_uas_stop_TrpA1_ FruFLP4		Attempted copulation	4	0	600
TrpB7_F6	30_dpr4_gal4_uas_stop_TrpA1_ FruFLP5		Attempted copulation	7	0	600
TrpB7_Q5	30_dpr4_gal4_uas_stop_TrpA1_ FruFLP7		Attempted copulation	1	0	88.45
TrpB7_F4	30_dpr4_gal4_uas_stop_TrpA1_ FruFLP8		Attempted copulation	5	0	600
TrpB7_R3	30_dpr4_gal4_uas_stop_TrpA1_ FruFLP9		Attempted copulation	6	0	600
TrpB1_D4	30_dpr5_gal4_uas_stop_Trpa1_FruFLP1		Attempted copulation	3	0	0:10:00.073000
TrpB3_M9	30_dpr5_gal4_uas_stop_Trpa1_FruFLP15		Attempted copulation	1	0	0:02:45.599000
TrpB1_M2	30_dpr5_gal4_uas_stop_Trpa1_FruFLP3		Attempted copulation	3	0	0:10:00.172000
TrpB2_R3	30_dpr5_gal4_uas_stop_Trpa1_FruFLP6		Attempted copulation	1	0	600.09
TrpB2_D1	30_dpr5_gal4_uas_stop_Trpa1_FruFLP9		Attempted copulation	2	0	600.18
TrpB7_F3	30_dpr6_gal4_uas_stop_TrpA1_ FruFLP1		Attempted copulation	13	0	600
TrpB7_A8	30_dpr6_gal4_uas_stop_TrpA1_ FruFLP10		Attempted copulation	5	0	600
TrpB7_P8	30_dpr6_gal4_uas_stop_TrpA1_ FruFLP11		Attempted copulation	3	0	600
TrpB7_E4	30_dpr6_gal4_uas_stop_TrpA1_ FruFLP12		Attempted copulation	18	0	600
TrpB7_V4	30_dpr6_gal4_uas_stop_TrpA1_ FruFLP13		Attempted copulation	15	0	600
TrpB7_D7	30_dpr6_gal4_uas_stop_TrpA1_ FruFLP14		Attempted copulation	18	0	600
TrpB7_Q3	30_dpr6_gal4_uas_stop_TrpA1_ FruFLP15		Attempted copulation	1	0	600
TrpB7_N9	30_dpr6_gal4_uas_stop_TrpA1_ FruFLP2		Attempted copulation	4	0	600
TrpB7_S3	30_dpr6_gal4_uas_stop_TrpA1_ FruFLP3		Attempted copulation	15	0	600
TrpB7_J7	30_dpr6_gal4_uas_stop_TrpA1_ FruFLP4		Attempted copulation	5	0	600
TrpB7_N7	30_dpr6_gal4_uas_stop_TrpA1_ FruFLP5		Attempted copulation	3	0	600
TrpB7_P6	30_dpr6_gal4_uas_stop_TrpA1_ FruFLP7		Attempted copulation	2	0	600
TrpB7_X5	30_dpr6_gal4_uas_stop_TrpA1_ FruFLP8		Attempted copulation	14	0	600
TrpB7_T2	30_dpr6_gal4_uas_stop_TrpA1_ FruFLP9		Attempted copulation	4	0	600
TrpB6_F2	30_dpr8_gal4_uas_stop_Trpa1_FruFLP10		Attempted copulation	2	0	0:02:39.185000
TrpB6_J1	30_dpr8_gal4_uas_stop_Trpa1_FruFLP11		Attempted copulation	10	0	0:10:00.074000
TrpB6_A4	30_dpr8_gal4_uas_stop_Trpa1_FruFLP12		Attempted copulation	1	0	0:10:00.244000
TrpB6_C4	30_dpr8_gal4_uas_stop_Trpa1_FruFLP13		Attempted copulation	5	0	0:10:00.034000
TrpB6_B7	30_dpr8_gal4_uas_stop_Trpa1_FruFLP14		Attempted copulation	12	0	0:10:00.075000
TrpB6_J3	30_dpr8_gal4_uas_stop_Trpa1_FruFLP4		Attempted copulation	4	0	0:10:00.076000
TrpB6_D6	30_dpr8_gal4_uas_stop_Trpa1_FruFLP5		Attempted copulation	23	0	0:10:00.015000
TrpB6_F1	30_dpr8_gal4_uas_stop_Trpa1_FruFLP6		Attempted copulation	17	0	0:10:00.085000
TrpB6_F3	30_dpr8_gal4_uas_stop_Trpa1_FruFLP7		Attempted copulation	9	0	0:10:00.143000
TrpB6_G4	30_dpr8_gal4_uas_stop_Trpa1_FruFLP8		Attempted copulation	17	0	0:09:43.740000
TrpB5_D8	30_dpr8_uas_stop_TrpA1_FruFLP1		Attempted copulation	2	0	0:03:22.456000
TrpB5_B2	30_dpr8_uas_stop_TrpA1_FruFLP2		Attempted copulation	10	0	0:10:00.078000
TrpB5_G3	30_dpr9_gal4_uas_stop_TrpA1_FruFLP1		Attempted copulation	1	0	0:10:00.138000
TrpB6_H3	30_dpr9_gal4_uas_stop_Trpa1_FruFLP11		Attempted copulation	7	0	0:10:00.193000
TrpB6_C6	30_dpr9_gal4_uas_stop_Trpa1_FruFLP12		Attempted copulation	2	0	0:10:00.182000
TrpB6_G9	30_dpr9_gal4_uas_stop_Trpa1_FruFLP13		Attempted copulation	9	0	0:10:00.081000
TrpB6_H5	30_dpr9_gal4_uas_stop_Trpa1_FruFLP14		Attempted copulation	22	0	0:10:00.158000
TrpB6_F7	30_dpr9_gal4_uas_stop_Trpa1_FruFLP15		Attempted copulation	9	0	0:10:00.057000
TrpB5_C8	30_dpr9_gal4_uas_stop_TrpA1_FruFLP2		Attempted copulation	12	0	0:10:00.042000
TrpB5_C9	30_dpr9_gal4_uas_stop_TrpA1_FruFLP4		Attempted copulation	1	0	0:10:00.126000
TrpB5_F9	30_dpr9_gal4_uas_stop_TrpA1_FruFLP7		Attempted copulation	3	0	0:10:00.031000
TrpB5_D4	30_dpr9_gal4_uas_stop_TrpA1_FruFLP8		Attempted copulation	3	0	0:10:00.104000
TrpB7_K4	30_FruFLP_1		Attempted copulation	17	0	600
TrpB7_O2	30_FruFLP_10		Attempted copulation	10	0	600
TrpB7_A6	30_FruFLP_11		Attempted copulation	16	0	600
TrpB7_B1	30_FruFLP_12		Attempted copulation	5	0	600
TrpB7_H5	30_FruFLP_13		Attempted copulation	4	0	600
TrpB7_U4	30_FruFLP_14		Attempted copulation	9	0	600
TrpB7_P1	30_FruFLP_15		Attempted copulation	6	0	600
TrpB7_M2	30_FruFLP_2		Attempted copulation	13	0	600
TrpB7_E7	30_FruFLP_3		Attempted copulation	18	0	600
TrpB7_E6	30_FruFLP_4		Attempted copulation	2	0	600
TrpB7_J3	30_FruFLP_5		Attempted copulation	9	0	600
TrpB7_C9	30_FruFLP_6		Attempted copulation	10	0	600
TrpB7_S6	30_FruFLP_7		Attempted copulation	12	0	600
TrpB7_W1	30_FruFLP_8		Attempted copulation	1	0	600
TrpB7_K1	30_FruFLP_9		Attempted copulation	4	0	600
TrpB4_B9	30_noGAL4_TrpA1_1		Attempted copulation	20	0	0:10:00.107000
TrpB4_G3	30_noGAL4_TrpA1_10		Attempted copulation	2	0	0:10:00.138000
TrpB4_A3	30_noGAL4_TrpA1_11		Attempted copulation	5	0	0:10:00.110000
TrpB4_F2	30_noGAL4_TrpA1_12		Attempted copulation	5	0	0:10:00.057000
TrpB4_B4	30_noGAL4_TrpA1_13		Attempted copulation	10	0	0:10:00.103000
TrpB4_G4	30_noGAL4_TrpA1_14		Attempted copulation	27	0	0:10:00.009000
TrpB4_B1	30_noGAL4_TrpA1_15		Attempted copulation	1	0	0:10:00.118000
TrpB4_E2	30_noGAL4_TrpA1_2		Attempted copulation	5	0	0:10:00.080000
TrpB4_F8	30_noGAL4_TrpA1_3		Attempted copulation	4	0	0:10:00.084000
TrpB4_C8	30_noGAL4_TrpA1_4		Attempted copulation	17	0	0:10:00.142000
TrpB4_G6	30_noGAL4_TrpA1_7		Attempted copulation	10	0	0:05:23.970000
TrpB4_G2	30_noGAL4_TrpA1_8		Attempted copulation	5	0	0:10:00.180000
TrpB4_D1	30_noGAL4_TrpA1_9		Attempted copulation	6	0	0:10:00.160000
TrpB7_L4	30_TrpA1_1		Attempted copulation	4	0	600
TrpB7_F5	30_TrpA1_10		Attempted copulation	20	0	600
TrpB7_X4	30_TrpA1_11		Attempted copulation	18	0	600
TrpB7_K8	30_TrpA1_12		Attempted copulation	40	0	600
TrpB7_L2	30_TrpA1_13		Attempted copulation	19	0	600
TrpB7_R5	30_TrpA1_14		Attempted copulation	42	0	600
TrpB7_F1	30_TrpA1_15		Attempted copulation	10	0	600
TrpB7_V9	30_TrpA1_2		Attempted copulation	4	0	600
TrpB7_K5	30_TrpA1_3		Attempted copulation	8	0	483.8
TrpB7_R7	30_TrpA1_4		Attempted copulation	2	0	224.55
TrpB7_N3	30_TrpA1_6		Attempted copulation	4	0	600
TrpB7_G7	30_TrpA1_7		Attempted copulation	19	0	600
TrpB7_S4	30_TrpA1_8		Attempted copulation	11	0	600
TrpB7_C1	30_TrpA1_9		Attempted copulation	15	0	600
TrpB7_P2	20_CSxwCS_7		Double wing extend	1	0.33	600
TrpB7_B2	20_CSxwCS_9		Double wing extend	3	2.68	346.45
TrpB1_A4	20_DIPepsilon_gal4_uas_stop_Trpa1_FruFLP2		Double wing extend	1	0:00:02.769000	0:04:25.812000
TrpB2_H1	20_DIPeta_gal4_uas_stop_Trpa1_FruFLP10		Double wing extend	2	2.37	600.03
TrpB3_K4	20_DIPeta_gal4_uas_stop_Trpa1_FruFLP11		Double wing extend	2	0:00:11.806000	0:10:00.127000
TrpB2_R5	20_DIPeta_gal4_uas_stop_Trpa1_FruFLP6		Double wing extend	3	4.63	109.96
TrpB3_G2	20_DIPzeta_gal4_uas_stop_Trpa1_FruFLP15		Double wing extend	1	0:00:01.729000	0:05:16.895000
TrpB3_M5	20_dpr10_gal4_uas_stop_Trpa1_FruFLP12		Double wing extend	1	0:00:02.417000	0:10:00.139000
TrpB3_J5	20_dpr11_gal4_uas_stop_Trpa1_FruFLP11		Double wing extend	9	0:00:38.912000	0:10:00.186000
TrpB3_A2	20_dpr12_gal4_uas_stop_Trpa1_FruFLP14		Double wing extend	1	0:00:03.669000	0:08:10.492000
TrpB1_C4	20_dpr12_gal4_uas_stop_Trpa1_FruFLP5		Double wing extend	2	0:00:04.291000	0:10:00.027000
TrpB2_P2	20_dpr12_gal4_uas_stop_Trpa1_FruFLP7		Double wing extend	15	39.25	600.02
TrpB7_F2	20_dpr14_gal4_uas_stop_Trpa1_FruFLP15		Double wing extend	2	1.22	600
TrpB7_D3	20_dpr14_gal4_uas_stop_Trpa1_FruFLP7		Double wing extend	2	3.73	600
TrpB7_H7	20_dpr18_gal4_uas_stop_Trpa1_FruFLP11		Double wing extend	37	64.23	600
TrpB6_F8	20_dpr8_gal4_uas_stop_Trpa1_FruFLP15		Double wing extend	1	0:00:02.270000	0:10:00.086000
TrpB5_B9	20_dpr9_gal4_uas_stop_Trpa1_FruFLP7		Double wing extend	24	0:03:19.917000	0:10:00.007000
TrpB5_A6	20_dpr9_gal4_uas_stop_Trpa1_FruFLP9		Double wing extend	1	0:00:01.458000	0:10:00.062000
TrpB7_J1	20_FruFLP_4		Double wing extend	1	0.64	408.69
TrpB7_K2	20_TrpA1_8		Double wing extend	3	3.51	293.82
TrpB7_A4	30_CSxwCS_1		Double wing extend	1	12.28	600
TrpB7_L5	30_CSxwCS_10		Double wing extend	1	6.97	600
TrpB7_G5	30_CSxwCS_9		Double wing extend	6	50.7	600
TrpB2_F3	30_DIPbeta_gal4_uas_stop_Trpa1_FruFLP6		Double wing extend	14	234.87	547.23
TrpB2_G2	30_DIPbeta_gal4_uas_stop_Trpa1_FruFLP9		Double wing extend	2	16.1	600.11
TrpB3_N4	30_DIPepsilon_gal4_uas_stop_Trpa1_FruFLP12		Double wing extend	4	0:00:28.108000	0:10:00.020000
TrpB3_D7	30_DIPepsilon_gal4_uas_stop_Trpa1_FruFLP15		Double wing extend	4	0:00:04.029000	0:10:00.033000
TrpB2_G7	30_DIPepsilon_gal4_uas_stop_Trpa1_FruFLP6		Double wing extend	39	188.32	600.09
TrpB2_O9	30_DIPepsilon_gal4_uas_stop_Trpa1_FruFLP9		Double wing extend	3	1.63	600.13
TrpB3_L8	30_DIPeta_gal4_uas_stop_Trpa1_FruFLP13		Double wing extend	1	0:00:04.945000	0:10:00.110000
TrpB2_M6	30_DIPeta_gal4_uas_stop_Trpa1_FruFLP8		Double wing extend	1	3.28	600.1
TrpB2_D4	30_DIPgamma_gal4_uas_stop_Trpa1_FruFLP10		Double wing extend	17	479.78	600.04
TrpB3_K8	30_DIPgamma_gal4_uas_stop_Trpa1_FruFLP11		Double wing extend	2	0:05:40.274000	0:10:00.160000
TrpB3_G9	30_DIPgamma_gal4_uas_stop_Trpa1_FruFLP12		Double wing extend	18	0:04:04.420000	0:10:00.148000
TrpB3_D5	30_DIPgamma_gal4_uas_stop_Trpa1_FruFLP14		Double wing extend	7	0:00:25.508000	0:10:00.127000
TrpB1_D9	30_DIPgamma_gal4_uas_stop_Trpa1_FruFLP4		Double wing extend	6	0:04:46.348000	0:10:00.079000
TrpB2_L7	30_DIPgamma_gal4_uas_stop_Trpa1_FruFLP8		Double wing extend	1	1.53	600.18
TrpB2_O2	30_DIPgamma_gal4_uas_stop_Trpa1_FruFLP9		Double wing extend	24	436.67	600.08
TrpB6_D8	30_dipTheta_gal4_uas_stop_TrpA1_ FruFLP14		Double wing extend	10	0:00:57.627000	0:10:00.060000
TrpB6_F5	30_dipTheta_gal4_uas_stop_TrpA1_ FruFLP15		Double wing extend	11	0:01:20.501000	0:10:00.067000
TrpB5_B8	30_dipTheta_gal4_uas_stop_TrpA1_FruFLP10		Double wing extend	4	0:05:57.885000	0:10:00.038000
TrpB5_H8	30_dipTheta_gal4_uas_stop_TrpA1_FruFLP12		Double wing extend	6	0:03:57.435000	0:10:00.136000
TrpB5_F6	30_dipTheta_gal4_uas_stop_TrpA1_FruFLP2		Double wing extend	2	0:00:01.213000	0:10:00.119000
TrpB5_F5	30_dipTheta_gal4_uas_stop_TrpA1_FruFLP3		Double wing extend	1	0:00:08.874000	0:10:00.163000
TrpB5_H9	30_dipTheta_gal4_uas_stop_TrpA1_FruFLP4		Double wing extend	11	0:00:45.112000	0:10:00.136000
TrpB5_B3	30_dipTheta_gal4_uas_stop_TrpA1_FruFLP6		Double wing extend	3	0:00:09.257000	0:10:00.072000
TrpB5_D5	30_dipTheta_gal4_uas_stop_TrpA1_FruFLP9		Double wing extend	6	0:07:25.392000	0:10:00.155000
TrpB1_N2	30_dpr1_gal4_uas_stop_Trpa1_FruFLP5		Double wing extend	1	0:08:56.978000	0:10:00.078000
TrpB2_M3	30_dpr1_gal4_uas_stop_Trpa1_FruFLP6		Double wing extend	2	584.63	600.09
TrpB2_F5	30_dpr1_gal4_uas_stop_Trpa1_FruFLP7		Double wing extend	8	92.71	600.19
TrpB2_M5	30_dpr1_gal4_uas_stop_Trpa1_FruFLP8		Double wing extend	12	248.04	600.05
TrpB1_K1	30_dpr10_gal4_uas_stop_Trpa1_FruFLP1		Double wing extend	31	0:02:55.475000	0:10:00.188000
TrpB2_L4	30_dpr10_gal4_uas_stop_Trpa1_FruFLP10		Double wing extend	10	51.89	600.78
TrpB3_H4	30_dpr10_gal4_uas_stop_Trpa1_FruFLP11		Double wing extend	42	0:04:03.090000	0:10:00.083000
TrpB3_J8	30_dpr10_gal4_uas_stop_Trpa1_FruFLP12		Double wing extend	1	0:00:03.404000	0:10:00.079000
TrpB3_B5	30_dpr10_gal4_uas_stop_Trpa1_FruFLP13		Double wing extend	31	0:02:16.122000	0:10:00.107000
TrpB3_M1	30_dpr10_gal4_uas_stop_Trpa1_FruFLP14		Double wing extend	24	0:01:06.826000	0:10:00.183000
TrpB3_B3	30_dpr10_gal4_uas_stop_Trpa1_FruFLP15		Double wing extend	22	0:02:45.715000	0:10:00.114000
TrpB1_E9	30_dpr10_gal4_uas_stop_Trpa1_FruFLP2		Double wing extend	9	0:02:09.933000	0:10:00.078000
TrpB1_R1	30_dpr10_gal4_uas_stop_Trpa1_FruFLP3		Double wing extend	18	0:04:41.656000	0:10:00.009000
TrpB1_N8	30_dpr10_gal4_uas_stop_Trpa1_FruFLP4		Double wing extend	5	0:07:19.407000	0:10:00.125000
TrpB1_D1	30_dpr10_gal4_uas_stop_Trpa1_FruFLP5		Double wing extend	11	0:00:14.885000	0:10:00.049000
TrpB2_K8	30_dpr10_gal4_uas_stop_Trpa1_FruFLP6		Double wing extend	5	586.17	600.14
TrpB2_B7	30_dpr10_gal4_uas_stop_Trpa1_FruFLP7		Double wing extend	2	122.78	600.06
TrpB2_B1	30_dpr10_gal4_uas_stop_Trpa1_FruFLP8		Double wing extend	1	598.36	600.03
TrpB2_S2	30_dpr10_gal4_uas_stop_Trpa1_FruFLP9		Double wing extend	30	106.51	600.19
TrpB1_L7	30_dpr11_gal4_uas_stop_Trpa1_FruFLP1		Double wing extend	1	0:09:33.875000	0:10:00.181000
TrpB2_K2	30_dpr11_gal4_uas_stop_Trpa1_FruFLP10		Double wing extend	1	592.3	600.02
TrpB3_R2	30_dpr11_gal4_uas_stop_Trpa1_FruFLP11		Double wing extend	1	0:09:59.624000	0:10:00.025000
TrpB3_P9	30_dpr11_gal4_uas_stop_Trpa1_FruFLP12		Double wing extend	2	0:09:58.480000	0:10:00.125000
TrpB3_N6	30_dpr11_gal4_uas_stop_Trpa1_FruFLP13		Double wing extend	7	0:09:43.040000	0:10:00.041000
TrpB3_R4	30_dpr11_gal4_uas_stop_Trpa1_FruFLP14		Double wing extend	2	0:09:20.503000	0:10:00.091000
TrpB3_R5	30_dpr11_gal4_uas_stop_Trpa1_FruFLP15		Double wing extend	1	0:09:59.046000	0:10:00.121000
TrpB1_F1	30_dpr11_gal4_uas_stop_Trpa1_FruFLP2		Double wing extend	2	0:09:25.332000	0:10:00.073000
TrpB1_B5	30_dpr11_gal4_uas_stop_Trpa1_FruFLP3		Double wing extend	1	0:09:56.825000	0:10:00.123000
TrpB1_M5	30_dpr11_gal4_uas_stop_Trpa1_FruFLP4		Double wing extend	1	0:09:39.823000	0:10:00.127000
TrpB1_M9	30_dpr11_gal4_uas_stop_Trpa1_FruFLP5		Double wing extend	1	0:09:59.522000	0:10:00.067000
TrpB2_M1	30_dpr11_gal4_uas_stop_Trpa1_FruFLP6		Double wing extend	1	595.47	600.06
TrpB2_P9	30_dpr11_gal4_uas_stop_Trpa1_FruFLP7		Double wing extend	1	596.78	600.06
TrpB2_J8	30_dpr11_gal4_uas_stop_Trpa1_FruFLP8		Double wing extend	1	577.75	600.01
TrpB2_K7	30_dpr11_gal4_uas_stop_Trpa1_FruFLP9		Double wing extend	1	598.73	600.08
TrpB1_D7	30_dpr12_gal4_uas_stop_Trpa1_FruFLP1		Double wing extend	4	0:08:10.825000	0:10:00.180000
TrpB2_E1	30_dpr12_gal4_uas_stop_Trpa1_FruFLP10		Double wing extend	11	377.28	600.09
TrpB3_E6	30_dpr12_gal4_uas_stop_Trpa1_FruFLP11		Double wing extend	22	0:04:31.153000	0:10:00.188000
TrpB3_B7	30_dpr12_gal4_uas_stop_Trpa1_FruFLP12		Double wing extend	1	0:09:59.693000	0:10:00.112000
TrpB3_E9	30_dpr12_gal4_uas_stop_Trpa1_FruFLP13		Double wing extend	36	0:04:25.932000	0:10:00.054000
TrpB3_P1	30_dpr12_gal4_uas_stop_Trpa1_FruFLP14		Double wing extend	5	0:06:36.363000	0:10:00.109000
TrpB3_E3	30_dpr12_gal4_uas_stop_Trpa1_FruFLP15		Double wing extend	10	0:01:40.884000	0:10:00.068000
TrpB1_G8	30_dpr12_gal4_uas_stop_Trpa1_FruFLP3		Double wing extend	17	0:01:29.559000	0:10:00.193000
TrpB1_F9	30_dpr12_gal4_uas_stop_Trpa1_FruFLP4		Double wing extend	1	0:00:01.052000	0:10:00.018000
TrpB1_F5	30_dpr12_gal4_uas_stop_Trpa1_FruFLP5		Double wing extend	3	0:09:39.794000	0:10:00.096000
TrpB2_P3	30_dpr12_gal4_uas_stop_Trpa1_FruFLP6		Double wing extend	23	294.65	600.07
TrpB2_A4	30_dpr12_gal4_uas_stop_Trpa1_FruFLP7		Double wing extend	2	594.11	600.12
TrpB2_B3	30_dpr12_gal4_uas_stop_Trpa1_FruFLP8		Double wing extend	1	559.48	600.1
TrpB2_C1	30_dpr12_gal4_uas_stop_Trpa1_FruFLP9		Double wing extend	10	213.56	600
TrpB7_L1	30_dpr14_gal4_uas_stop_TrpA1_ FruFLP11		Double wing extend	1	0.79	600
TrpB7_W9	30_dpr14_gal4_uas_stop_TrpA1_ FruFLP12		Double wing extend	2	34.18	600
TrpB7_H6	30_dpr14_gal4_uas_stop_TrpA1_ FruFLP15		Double wing extend	16	23.08	600
TrpB7_D4	30_dpr14_gal4_uas_stop_TrpA1_ FruFLP2		Double wing extend	13	120.6	600
TrpB7_G3	30_dpr14_gal4_uas_stop_TrpA1_ FruFLP3		Double wing extend	7	32.75	600
TrpB7_A9	30_dpr14_gal4_uas_stop_TrpA1_ FruFLP8		Double wing extend	35	70.52	600
TrpB7_Q4	30_dpr14_gal4_uas_stop_TrpA1_ FruFLP9		Double wing extend	2	0.73	600
TrpB5_D3	30_dpr15_gal4_uas_stop_TrpA1_6		Double wing extend	3	0:00:20.766000	0:10:00.024000
TrpB5_H6	30_dpr15_gal4_uas_stop_TrpA1_7		Double wing extend	10	0:00:37.454000	0:10:00.124000
TrpB4_A6	30_Dpr15_gal4_uas_stop_Trpa1_FruFLP1		Double wing extend	3	0:05:56.759000	0:10:00.102000
TrpB6_D3	30_dpr15_gal4_uas_stop_Trpa1_FruFLP11		Double wing extend	19	0:01:22.977000	0:10:00.018000
TrpB6_J5	30_dpr15_gal4_uas_stop_Trpa1_FruFLP12		Double wing extend	3	0:00:08.234000	0:10:00.089000
TrpB6_H9	30_dpr15_gal4_uas_stop_Trpa1_FruFLP13		Double wing extend	42	0:05:17.972000	0:10:00.003000
TrpB6_A9	30_dpr15_gal4_uas_stop_Trpa1_FruFLP14		Double wing extend	4	0:09:49.578000	0:10:00.041000
TrpB6_B6	30_dpr15_gal4_uas_stop_Trpa1_FruFLP15		Double wing extend	17	0:05:09.739000	0:10:00.094000
TrpB4_G1	30_Dpr15_gal4_uas_stop_Trpa1_FruFLP2		Double wing extend	5	0:05:37.364000	0:10:00.163000
TrpB4_E7	30_Dpr15_gal4_uas_stop_Trpa1_FruFLP3		Double wing extend	6	0:09:30.305000	0:10:00.177000
TrpB4_C9	30_Dpr15_gal4_uas_stop_Trpa1_FruFLP4		Double wing extend	1	0:09:54.359000	0:10:00.030000
TrpB4_A5	30_Dpr15_gal4_uas_stop_Trpa1_FruFLP5		Double wing extend	4	0:09:49.888000	0:10:00.008000
TrpB6_E9	30_dpr15_gal4_uas_stop_Trpa1_FruFLP8		Double wing extend	6	0:00:06.392000	0:10:00.033000
TrpB6_B1	30_dpr15_gal4_uas_stop_Trpa1_FruFLP9		Double wing extend	18	0:06:02.627000	0:10:00.020000
TrpB3_D3	30_dpr16_gal4_uas_stop_Trpa1_FruFLP14		Double wing extend	6	0:00:03.701000	0:10:00.104000
TrpB3_C1	30_dpr16_gal4_uas_stop_Trpa1_FruFLP15		Double wing extend	3	0:00:05.386000	0:10:00.075000
TrpB1_J1	30_dpr16_gal4_uas_stop_Trpa1_FruFLP2		Double wing extend	2	0:00:01.600000	0:10:00.143000
TrpB2_L8	30_dpr16_gal4_uas_stop_Trpa1_FruFLP7		Double wing extend	6	4.39	600.02
TrpB4_A7	30_Dpr17_gal4_uas_stop_Trpa1_FruFLP1		Double wing extend	2	0:00:03.055000	0:10:00.151000
TrpB7_F8	30_dpr18_gal4_uas_stop_TrpA1_ FruFLP1		Double wing extend	10	164.16	600
TrpB7_R8	30_dpr18_gal4_uas_stop_TrpA1_ FruFLP12		Double wing extend	2	0.83	600
TrpB7_T9	30_dpr18_gal4_uas_stop_TrpA1_ FruFLP2		Double wing extend	3	8.39	600
TrpB7_Q7	30_dpr18_gal4_uas_stop_TrpA1_ FruFLP6		Double wing extend	1	575.72	600
TrpB7_P3	30_dpr18_gal4_uas_stop_TrpA1_ FruFLP7		Double wing extend	5	569.49	600
TrpB7_S1	30_dpr18_gal4_uas_stop_TrpA1_ FruFLP8		Double wing extend	1	0.27	600
TrpB6_D9	30_dpr2_gal4_uas_stop_TrpA1_ FruFLP10		Double wing extend	11	0:00:41.606000	0:10:00.032000
TrpB6_E1	30_dpr2_gal4_uas_stop_TrpA1_ FruFLP8		Double wing extend	7	0:01:02.812000	0:10:00.130000
TrpB5_B5	30_dpr2_gal4_uas_stop_TrpA1_FruFLP6		Double wing extend	1	0:00:01.172000	0:10:00.084000
TrpB2_R9	30_dpr3_gal4_uas_stop_Trpa1_FruFLP10		Double wing extend	8	12.59	600.03
TrpB3_B8	30_dpr3_gal4_uas_stop_Trpa1_FruFLP12		Double wing extend	11	0:05:05.510000	0:10:00.046000
TrpB3_H5	30_dpr3_gal4_uas_stop_Trpa1_FruFLP13		Double wing extend	20	0:06:11.448000	0:10:00.061000
TrpB3_O6	30_dpr3_gal4_uas_stop_Trpa1_FruFLP15		Double wing extend	1	0:08:42.974000	0:10:00.072000
TrpB1_B2	30_dpr3_gal4_uas_stop_Trpa1_FruFLP5		Double wing extend	5	0:00:04.055000	0:10:00.158000
TrpB7_V1	30_dpr4_gal4_uas_stop_TrpA1_ FruFLP1		Double wing extend	3	15.36	600
TrpB7_O7	30_dpr4_gal4_uas_stop_TrpA1_ FruFLP10		Double wing extend	16	29.11	600
TrpB7_M1	30_dpr4_gal4_uas_stop_TrpA1_ FruFLP11		Double wing extend	31	499.53	600
TrpB7_A2	30_dpr4_gal4_uas_stop_TrpA1_ FruFLP12		Double wing extend	11	513.01	600
TrpB7_B6	30_dpr4_gal4_uas_stop_TrpA1_ FruFLP13		Double wing extend	34	339.27	600
TrpB7_K9	30_dpr4_gal4_uas_stop_TrpA1_ FruFLP14		Double wing extend	26	274.72	600
TrpB7_B4	30_dpr4_gal4_uas_stop_TrpA1_ FruFLP15		Double wing extend	10	26.46	600
TrpB7_D6	30_dpr4_gal4_uas_stop_TrpA1_ FruFLP2		Double wing extend	6	10.74	600
TrpB7_T1	30_dpr4_gal4_uas_stop_TrpA1_ FruFLP3		Double wing extend	5	33.2	600
TrpB7_F7	30_dpr4_gal4_uas_stop_TrpA1_ FruFLP4		Double wing extend	21	484.88	600
TrpB7_U5	30_dpr4_gal4_uas_stop_TrpA1_ FruFLP6		Double wing extend	14	49.01	600
TrpB7_Q5	30_dpr4_gal4_uas_stop_TrpA1_ FruFLP7		Double wing extend	1	3.38	88.45
TrpB7_R3	30_dpr4_gal4_uas_stop_TrpA1_ FruFLP9		Double wing extend	26	297.9	600
TrpB1_D4	30_dpr5_gal4_uas_stop_Trpa1_FruFLP1		Double wing extend	4	0:07:22.119000	0:10:00.073000
TrpB2_O7	30_dpr5_gal4_uas_stop_Trpa1_FruFLP10		Double wing extend	1	597.44	600.17
TrpB3_O9	30_dpr5_gal4_uas_stop_Trpa1_FruFLP11		Double wing extend	1	0:09:58.650000	0:10:00.171000
TrpB3_M4	30_dpr5_gal4_uas_stop_Trpa1_FruFLP12		Double wing extend	1	0:09:53.718000	0:10:00.065000
TrpB3_S4	30_dpr5_gal4_uas_stop_Trpa1_FruFLP13		Double wing extend	1	0:09:49.158000	0:10:00.154000
TrpB3_C2	30_dpr5_gal4_uas_stop_Trpa1_FruFLP14		Double wing extend	2	0:09:46.611000	0:10:00.168000
TrpB3_M9	30_dpr5_gal4_uas_stop_Trpa1_FruFLP15		Double wing extend	1	0:00:00.525000	0:02:45.599000
TrpB1_R6	30_dpr5_gal4_uas_stop_Trpa1_FruFLP2		Double wing extend	2	0:06:53.363000	0:10:00.013000
TrpB1_M2	30_dpr5_gal4_uas_stop_Trpa1_FruFLP3		Double wing extend	1	0:09:32.774000	0:10:00.172000
TrpB1_E7	30_dpr5_gal4_uas_stop_Trpa1_FruFLP4		Double wing extend	5	0:08:58.576000	0:10:00.110000
TrpB2_R3	30_dpr5_gal4_uas_stop_Trpa1_FruFLP6		Double wing extend	1	584.65	600.09
TrpB2_G9	30_dpr5_gal4_uas_stop_Trpa1_FruFLP7		Double wing extend	1	597.89	600.05
TrpB2_H9	30_dpr5_gal4_uas_stop_Trpa1_FruFLP8		Double wing extend	1	597.01	600.15
TrpB2_D1	30_dpr5_gal4_uas_stop_Trpa1_FruFLP9		Double wing extend	1	556.42	600.18
TrpB7_A8	30_dpr6_gal4_uas_stop_TrpA1_ FruFLP10		Double wing extend	2	1.08	600
TrpB7_D7	30_dpr6_gal4_uas_stop_TrpA1_ FruFLP14		Double wing extend	2	2.8	600
TrpB7_S3	30_dpr6_gal4_uas_stop_TrpA1_ FruFLP3		Double wing extend	1	2.92	600
TrpB7_J7	30_dpr6_gal4_uas_stop_TrpA1_ FruFLP4		Double wing extend	48	50.97	600
TrpB7_N7	30_dpr6_gal4_uas_stop_TrpA1_ FruFLP5		Double wing extend	1	0.53	600
TrpB7_X5	30_dpr6_gal4_uas_stop_TrpA1_ FruFLP8		Double wing extend	1	1.68	600
TrpB6_F9	30_dpr9_gal4_uas_stop_Trpa1_FruFLP10		Double wing extend	5	0:00:06.835000	0:10:00.043000
TrpB6_H3	30_dpr9_gal4_uas_stop_Trpa1_FruFLP11		Double wing extend	2	0:00:01.697000	0:10:00.193000
TrpB6_G9	30_dpr9_gal4_uas_stop_Trpa1_FruFLP13		Double wing extend	1	0:00:00.715000	0:10:00.081000
TrpB6_H5	30_dpr9_gal4_uas_stop_Trpa1_FruFLP14		Double wing extend	23	0:00:57.100000	0:10:00.158000
TrpB6_F7	30_dpr9_gal4_uas_stop_Trpa1_FruFLP15		Double wing extend	18	0:06:37.731000	0:10:00.057000
TrpB5_C8	30_dpr9_gal4_uas_stop_TrpA1_FruFLP2		Double wing extend	18	0:05:27.983000	0:10:00.042000
TrpB5_E2	30_dpr9_gal4_uas_stop_TrpA1_FruFLP3		Double wing extend	22	0:03:00.747000	0:10:00.040000
TrpB5_C9	30_dpr9_gal4_uas_stop_TrpA1_FruFLP4		Double wing extend	22	0:05:21.521000	0:10:00.126000
TrpB5_E4	30_dpr9_gal4_uas_stop_TrpA1_FruFLP5		Double wing extend	12	0:00:26.509000	0:10:00.050000
TrpB5_A3	30_dpr9_gal4_uas_stop_TrpA1_FruFLP6		Double wing extend	12	0:06:49.141000	0:10:00.059000
TrpB5_F9	30_dpr9_gal4_uas_stop_TrpA1_FruFLP7		Double wing extend	19	0:04:57.965000	0:10:00.031000
TrpB5_D4	30_dpr9_gal4_uas_stop_TrpA1_FruFLP8		Double wing extend	10	0:06:50.687000	0:10:00.104000
TrpB5_G4	30_dpr9_gal4_uas_stop_TrpA1_FruFLP9		Double wing extend	15	0:05:49.347000	0:10:00.171000
TrpB4_G4	30_noGAL4_TrpA1_14		Double wing extend	1	0:00:01.584000	0:10:00.009000
TrpB7_F1	30_TrpA1_15		Double wing extend	2	3.05	600
TrpB7_G7	30_TrpA1_7		Double wing extend	4	25.68	600
TrpB7_C8	20_CSxwCS_1		Following	1	289.31	300.28
TrpB7_R9	20_CSxwCS_10		Following	1	394.05	399.42
TrpB7_Q1	20_CSxwCS_12		Following	13	308.48	600
TrpB7_T3	20_CSxwCS_13		Following	2	314.28	330.5
TrpB7_E1	20_CSxwCS_14		Following	27	141.78	600
TrpB7_V7	20_CSxwCS_15		Following	1	95.52	102.46
TrpB7_V3	20_CSxwCS_2		Following	3	568.76	600
TrpB7_E8	20_CSxwCS_3		Following	2	589.74	600
TrpB7_Y2	20_CSxwCS_4		Following	7	506.5	600
TrpB7_G9	20_CSxwCS_5		Following	1	595.2	600
TrpB7_K3	20_CSxwCS_6		Following	2	587.4	600
TrpB7_P2	20_CSxwCS_7		Following	19	502.82	600
TrpB7_K7	20_CSxwCS_8		Following	2	343.79	377.32
TrpB7_B2	20_CSxwCS_9		Following	1	332.27	346.45
TrpB1_O3	20_DIPalpha_gal4_uas_stop_Trpa1_FruFLP1		Following	2	0:07:38.048000	0:07:45.962000
TrpB2_M2	20_DIPalpha_gal4_uas_stop_Trpa1_FruFLP10		Following	2	156.73	174.67
TrpB3_N3	20_DIPalpha_gal4_uas_stop_Trpa1_FruFLP11		Following	1	0:01:36.251000	0:01:37.393000
TrpB3_R7	20_DIPalpha_gal4_uas_stop_Trpa1_FruFLP12		Following	2	0:08:46.151000	0:09:21.668000
TrpB3_J1	20_DIPalpha_gal4_uas_stop_Trpa1_FruFLP13		Following	4	0:03:19.327000	0:04:52.433000
TrpB3_O1	20_DIPalpha_gal4_uas_stop_Trpa1_FruFLP14		Following	1	0:01:59.094000	0:02:14.643000
TrpB3_S5	20_DIPalpha_gal4_uas_stop_Trpa1_FruFLP15		Following	1	0:03:26.720000	0:03:57.978000
TrpB1_K3	20_DIPalpha_gal4_uas_stop_Trpa1_FruFLP2		Following	3	0:07:13.466000	0:07:32.279000
TrpB1_K8	20_DIPalpha_gal4_uas_stop_Trpa1_FruFLP3		Following	1	0:08:14.949000	0:09:03.091000
TrpB1_N3	20_DIPalpha_gal4_uas_stop_Trpa1_FruFLP4		Following	1	0:02:27.946000	0:03:04.995000
TrpB1_H6	20_DIPalpha_gal4_uas_stop_Trpa1_FruFLP5		Following	3	0:08:24.584000	0:09:18.044000
TrpB2_G3	20_DIPalpha_gal4_uas_stop_Trpa1_FruFLP6		Following	1	166.67	195.9
TrpB2_H3	20_DIPalpha_gal4_uas_stop_Trpa1_FruFLP7		Following	1	199.3	207.29
TrpB2_C9	20_DIPalpha_gal4_uas_stop_Trpa1_FruFLP8		Following	1	403.5	426.68
TrpB2_F6	20_DIPalpha_gal4_uas_stop_Trpa1_FruFLP9		Following	1	587.73	600.15
TrpB1_E3	20_DIPbeta_gal4_uas_stop_Trpa1_FruFLP1		Following	1	0:09:40.298000	0:10:00.180000
TrpB2_A5	20_DIPbeta_gal4_uas_stop_Trpa1_FruFLP10		Following	2	216.33	232.5
TrpB3_H8	20_DIPbeta_gal4_uas_stop_Trpa1_FruFLP11		Following	1	0:00:51.938000	0:01:03.272000
TrpB3_B1	20_DIPbeta_gal4_uas_stop_Trpa1_FruFLP12		Following	1	0:02:22.823000	0:02:31.486000
TrpB3_M8	20_DIPbeta_gal4_uas_stop_Trpa1_FruFLP13		Following	2	0:05:32.648000	0:05:46.335000
TrpB3_K7	20_DIPbeta_gal4_uas_stop_Trpa1_FruFLP14		Following	1	0:02:00.352000	0:02:08.277000
TrpB3_L5	20_DIPbeta_gal4_uas_stop_Trpa1_FruFLP15		Following	1	0:07:12.615000	0:07:15.697000
TrpB1_P8	20_DIPbeta_gal4_uas_stop_Trpa1_FruFLP2		Following	1	0:05:25.287000	0:05:30.856000
TrpB1_O6	20_DIPbeta_gal4_uas_stop_Trpa1_FruFLP3		Following	1	0:03:17.171000	0:03:58.163000
TrpB1_B1	20_DIPbeta_gal4_uas_stop_Trpa1_FruFLP4		Following	1	0:02:21.074000	0:02:27.045000
TrpB1_G3	20_DIPbeta_gal4_uas_stop_Trpa1_FruFLP5		Following	1	0:03:38.302000	0:03:43.487000
TrpB2_H7	20_DIPbeta_gal4_uas_stop_Trpa1_FruFLP6		Following	1	114.17	120.41
TrpB2_B2	20_DIPbeta_gal4_uas_stop_Trpa1_FruFLP7		Following	1	357.91	398.83
TrpB2_L2	20_DIPbeta_gal4_uas_stop_Trpa1_FruFLP8		Following	1	387.15	422.88
TrpB2_G5	20_DIPbeta_gal4_uas_stop_Trpa1_FruFLP9		Following	1	351.11	367.55
TrpB1_E8	20_DIPdelta_gal4_uas_stop_Trpa1_FruFLP1		Following	1	0:07:52.682000	0:07:54.478000
TrpB2_S3	20_DIPdelta_gal4_uas_stop_Trpa1_FruFLP10		Following	1	278.36	278.88
TrpB3_K1	20_DIPdelta_gal4_uas_stop_Trpa1_FruFLP11		Following	1	0:05:20.768000	0:05:24.386000
TrpB3_G8	20_DIPdelta_gal4_uas_stop_Trpa1_FruFLP12		Following	1	0:03:06.226000	0:03:18.958000
TrpB3_B2	20_DIPdelta_gal4_uas_stop_Trpa1_FruFLP13		Following	2	0:00:24.511000	0:01:01.904000
TrpB3_A4	20_DIPdelta_gal4_uas_stop_Trpa1_FruFLP14		Following	1	0:02:26.304000	0:02:27.474000
TrpB3_L7	20_DIPdelta_gal4_uas_stop_Trpa1_FruFLP15		Following	1	0:04:50.413000	0:04:58.971000
TrpB1_L3	20_DIPdelta_gal4_uas_stop_Trpa1_FruFLP2		Following	2	0:01:16.865000	0:01:39.794000
TrpB1_C5	20_DIPdelta_gal4_uas_stop_Trpa1_FruFLP3		Following	1	0:02:57.707000	0:03:00.583000
TrpB1_H9	20_DIPdelta_gal4_uas_stop_Trpa1_FruFLP4		Following	1	0:01:59.491000	0:02:07.687000
TrpB1_J9	20_DIPdelta_gal4_uas_stop_Trpa1_FruFLP5		Following	4	0:08:47.810000	0:09:20.331000
TrpB2_C3	20_DIPdelta_gal4_uas_stop_Trpa1_FruFLP6		Following	1	355.56	363.11
TrpB2_M9	20_DIPdelta_gal4_uas_stop_Trpa1_FruFLP7		Following	3	568.31	600.2
TrpB2_C2	20_DIPdelta_gal4_uas_stop_Trpa1_FruFLP8		Following	1	110.83	119.18
TrpB2_K6	20_DIPdelta_gal4_uas_stop_Trpa1_FruFLP9		Following	1	140.46	142.27
TrpB1_P1	20_DIPepsilon_gal4_uas_stop_Trpa1_FruFLP1		Following	1	0:00:44.855000	0:00:52.946000
TrpB2_O8	20_DIPepsilon_gal4_uas_stop_Trpa1_FruFLP10		Following	2	188.63	196.98
TrpB3_K6	20_DIPepsilon_gal4_uas_stop_Trpa1_FruFLP11		Following	1	0:01:03.459000	0:01:04.455000
TrpB3_P8	20_DIPepsilon_gal4_uas_stop_Trpa1_FruFLP13		Following	3	0:02:09.575000	0:03:29.783000
TrpB3_L9	20_DIPepsilon_gal4_uas_stop_Trpa1_FruFLP14		Following	1	0:04:59.144000	0:05:01.660000
TrpB3_C6	20_DIPepsilon_gal4_uas_stop_Trpa1_FruFLP15		Following	1	0:06:49.146000	0:06:50.581000
TrpB1_A4	20_DIPepsilon_gal4_uas_stop_Trpa1_FruFLP2		Following	2	0:03:31.222000	0:04:25.812000
TrpB1_N6	20_DIPepsilon_gal4_uas_stop_Trpa1_FruFLP3		Following	1	0:01:35.019000	0:01:44.741000
TrpB1_P3	20_DIPepsilon_gal4_uas_stop_Trpa1_FruFLP4		Following	1	0:02:15.186000	0:02:16.864000
TrpB1_P9	20_DIPepsilon_gal4_uas_stop_Trpa1_FruFLP5		Following	2	0:01:04.038000	0:02:05.508000
TrpB2_E6	20_DIPepsilon_gal4_uas_stop_Trpa1_FruFLP6		Following	1	35.32	59.62
TrpB2_B5	20_DIPepsilon_gal4_uas_stop_Trpa1_FruFLP7		Following	2	128.8	151.65
TrpB2_P4	20_DIPepsilon_gal4_uas_stop_Trpa1_FruFLP8		Following	1	239.3	240.82
TrpB2_O3	20_DIPepsilon_gal4_uas_stop_Trpa1_FruFLP9		Following	2	6.74	600.05
TrpB1_E4	20_DIPeta_gal4_uas_stop_Trpa1_FruFLP1		Following	1	0:02:36.081000	0:02:38.679000
TrpB2_H1	20_DIPeta_gal4_uas_stop_Trpa1_FruFLP10		Following	3	247.42	600.03
TrpB3_K4	20_DIPeta_gal4_uas_stop_Trpa1_FruFLP11		Following	1	0:09:59.694000	0:10:00.127000
TrpB3_E8	20_DIPeta_gal4_uas_stop_Trpa1_FruFLP12		Following	1	0:06:17.668000	0:06:24.893000
TrpB3_S3	20_DIPeta_gal4_uas_stop_Trpa1_FruFLP13		Following	1	0:01:53.231000	0:01:55.486000
TrpB3_C4	20_DIPeta_gal4_uas_stop_Trpa1_FruFLP14		Following	1	0:02:34.372000	0:02:41.344000
TrpB3_G4	20_DIPeta_gal4_uas_stop_Trpa1_FruFLP15		Following	1	0:01:43.905000	0:01:50.097000
TrpB1_L9	20_DIPeta_gal4_uas_stop_Trpa1_FruFLP2		Following	1	0:02:45.926000	0:02:57.108000
TrpB1_H8	20_DIPeta_gal4_uas_stop_Trpa1_FruFLP3		Following	1	0:03:44.880000	0:03:53.015000
TrpB1_D2	20_DIPeta_gal4_uas_stop_Trpa1_FruFLP4		Following	5	0:01:30.315000	0:02:30.302000
TrpB1_G2	20_DIPeta_gal4_uas_stop_Trpa1_FruFLP5		Following	1	0:08:50.293000	0:08:51.022000
TrpB2_R5	20_DIPeta_gal4_uas_stop_Trpa1_FruFLP6		Following	1	104.03	109.96
TrpB2_x001F__E7	20_DIPeta_gal4_uas_stop_Trpa1_FruFLP7		Following	1	597.91	600.08
TrpB2_S4	20_DIPeta_gal4_uas_stop_Trpa1_FruFLP8		Following	1	385.66	398.33
TrpB2_N4	20_DIPeta_gal4_uas_stop_Trpa1_FruFLP9		Following	6	263.17	600.13
TrpB1_R5	20_DIPgamma_gal4_uas_stop_Trpa1_FruFLP1		Following	1	0:08:44.057000	0:08:53.234000
TrpB2_N8	20_DIPgamma_gal4_uas_stop_Trpa1_FruFLP10		Following	2	174.46	182.06
TrpB3_M3	20_DIPgamma_gal4_uas_stop_Trpa1_FruFLP11		Following	1	0:02:15.937000	0:02:42.838000
TrpB3_F9	20_DIPgamma_gal4_uas_stop_Trpa1_FruFLP12		Following	1	0:00:00.076000	0:03:44.073000
TrpB3_P5	20_DIPgamma_gal4_uas_stop_Trpa1_FruFLP13		Following	1	0:05:10.037000	0:05:19.115000
TrpB3_M2	20_DIPgamma_gal4_uas_stop_Trpa1_FruFLP14		Following	1	0:06:43.874000	0:07:16.523000
TrpB3_H3	20_DIPgamma_gal4_uas_stop_Trpa1_FruFLP15		Following	1	0:02:40.208000	0:02:41.530000
TrpB1_O7	20_DIPgamma_gal4_uas_stop_Trpa1_FruFLP2		Following	1	0:09:47.264000	0:10:00.035000
TrpB1_D5	20_DIPgamma_gal4_uas_stop_Trpa1_FruFLP3		Following	1	0:02:01.355000	0:02:05.246000
TrpB1_F6	20_DIPgamma_gal4_uas_stop_Trpa1_FruFLP4		Following	1	0:08:07.682000	0:08:30.486000
TrpB1_K4	20_DIPgamma_gal4_uas_stop_Trpa1_FruFLP5		Following	1	0:06:14.591000	0:06:21.843000
TrpB2_S1	20_DIPgamma_gal4_uas_stop_Trpa1_FruFLP6		Following	1	127.21	129.1
TrpB2_L9	20_DIPgamma_gal4_uas_stop_Trpa1_FruFLP7		Following	1	332.87	334.76
TrpB2_B4	20_DIPgamma_gal4_uas_stop_Trpa1_FruFLP8		Following	2	101.41	119.55
TrpB2_H6	20_DIPgamma_gal4_uas_stop_Trpa1_FruFLP9		Following	1	116.86	120.91
TrpB5_F1	20_DIPTheta_gal4_uas_stop_Trpa1_FruFLP1		Following	1	0:07:07.196000	0:07:08.784000
TrpB5_E8	20_DIPTheta_gal4_uas_stop_Trpa1_FruFLP10		Following	2	0:03:20.385000	0:03:31.044000
TrpB5_G6	20_DIPTheta_gal4_uas_stop_Trpa1_FruFLP11		Following	1	0:01:42.603000	0:01:43.151000
TrpB5_F4	20_DIPTheta_gal4_uas_stop_Trpa1_FruFLP12		Following	2	0:04:58.073000	0:05:05.949000
TrpB6_E8	20_DIPTheta_gal4_uas_stop_Trpa1_FruFLP13		Following	1	0:09:52.788000	0:10:00.025000
TrpB6_H1	20_DIPTheta_gal4_uas_stop_Trpa1_FruFLP14		Following	2	0:09:40.246000	0:10:00.205000
TrpB6_H4	20_DIPTheta_gal4_uas_stop_Trpa1_FruFLP15		Following	1	0:09:53.754000	0:10:00.126000
TrpB5_H4	20_DIPTheta_gal4_uas_stop_Trpa1_FruFLP2		Following	1	0:02:38.122000	0:02:48.315000
TrpB5_A7	20_DIPTheta_gal4_uas_stop_Trpa1_FruFLP4		Following	1	0:03:59.280000	0:04:06.779000
TrpB5_D2	20_DIPTheta_gal4_uas_stop_Trpa1_FruFLP5		Following	2	0:09:10.535000	0:09:14.491000
TrpB5_C6	20_DIPTheta_gal4_uas_stop_Trpa1_FruFLP6		Following	1	0:08:34.429000	0:08:48.689000
TrpB5_A5	20_DIPTheta_gal4_uas_stop_Trpa1_FruFLP7		Following	1	0:04:29.248000	0:05:15.687000
TrpB5_A2	20_DIPTheta_gal4_uas_stop_Trpa1_FruFLP8		Following	4	0:09:19.349000	0:10:00.104000
TrpB5_H3	20_DIPTheta_gal4_uas_stop_Trpa1_FruFLP9		Following	2	0:09:50.254000	0:10:00.150000
TrpB1_B3	20_DIPzeta_gal4_uas_stop_Trpa1_FruFLP1		Following	1	0:01:43.291000	0:02:17.037000
TrpB2_L3	20_DIPzeta_gal4_uas_stop_Trpa1_FruFLP10		Following	1	150.35	156.74
TrpB3_P3	20_DIPzeta_gal4_uas_stop_Trpa1_FruFLP11		Following	1	0:07:21.598000	0:07:25.724000
TrpB3_O5	20_DIPzeta_gal4_uas_stop_Trpa1_FruFLP12		Following	1	0:01:14.895000	0:01:16.859000
TrpB3_N5	20_DIPzeta_gal4_uas_stop_Trpa1_FruFLP13		Following	1	0:01:43.467000	0:01:53.743000
TrpB3_R3	20_DIPzeta_gal4_uas_stop_Trpa1_FruFLP14		Following	1	0:02:24.453000	0:02:26.676000
TrpB3_G2	20_DIPzeta_gal4_uas_stop_Trpa1_FruFLP15		Following	1	0:05:16.210000	0:05:16.895000
TrpB1_L4	20_DIPzeta_gal4_uas_stop_Trpa1_FruFLP2		Following	1	0:03:48.036000	0:03:54.220000
TrpB1_F8	20_DIPzeta_gal4_uas_stop_Trpa1_FruFLP3		Following	1	0:03:01.808000	0:03:04.539000
TrpB1_S6	20_DIPzeta_gal4_uas_stop_Trpa1_FruFLP4		Following	1	0:00:55.356000	0:00:55.903000
TrpB1_O9	20_DIPzeta_gal4_uas_stop_Trpa1_FruFLP5		Following	1	0:04:57.957000	0:05:02.724000
TrpB2_A9	20_DIPzeta_gal4_uas_stop_Trpa1_FruFLP6		Following	1	74.43	82.33
TrpB2_F8	20_DIPzeta_gal4_uas_stop_Trpa1_FruFLP7		Following	1	261.93	282.69
TrpB2_F9	20_DIPzeta_gal4_uas_stop_Trpa1_FruFLP8		Following	1	261.2	275.74
TrpB2_K1	20_DIPzeta_gal4_uas_stop_Trpa1_FruFLP9		Following	3	57.08	65.64
TrpB1_C6	20_dpr1_gal4_uas_stop_Trpa1_FruFLP1		Following	8	0:05:33.234000	0:10:00.194000
TrpB2_G1	20_dpr1_gal4_uas_stop_Trpa1_FruFLP10		Following	2	348.58	600.18
TrpB3_K2	20_dpr1_gal4_uas_stop_Trpa1_FruFLP11		Following	2	0:00:51.169000	0:01:22.804000
TrpB3_L2	20_dpr1_gal4_uas_stop_Trpa1_FruFLP12		Following	1	0:00:01.083000	0:10:00.074000
TrpB3_K9	20_dpr1_gal4_uas_stop_Trpa1_FruFLP13		Following	1	0:02:14.815000	0:02:16.539000
TrpB3_F7	20_dpr1_gal4_uas_stop_Trpa1_FruFLP14		Following	1	0:09:59.221000	0:10:00.075000
TrpB3_S2	20_dpr1_gal4_uas_stop_Trpa1_FruFLP15		Following	2	0:09:41.358000	0:10:00.050000
TrpB1_K6	20_dpr1_gal4_uas_stop_Trpa1_FruFLP2		Following	2	0:07:45.981000	0:10:00.151000
TrpB1_R7	20_dpr1_gal4_uas_stop_Trpa1_FruFLP3		Following	3	0:07:01.463000	0:07:09.424000
TrpB1_R2	20_dpr1_gal4_uas_stop_Trpa1_FruFLP4		Following	2	0:02:33.706000	0:02:41.954000
TrpB1_P6	20_dpr1_gal4_uas_stop_Trpa1_FruFLP5		Following	1	0:02:56.381000	0:02:58.374000
TrpB2_F1	20_dpr1_gal4_uas_stop_Trpa1_FruFLP6		Following	1	598.85	600.01
TrpB2_J6	20_dpr1_gal4_uas_stop_Trpa1_FruFLP7		Following	1	117.62	127.15
TrpB2_O5	20_dpr1_gal4_uas_stop_Trpa1_FruFLP8		Following	1	579.95	600.13
TrpB2_S5	20_dpr1_gal4_uas_stop_Trpa1_FruFLP9		Following	1	69.61	78.36
TrpB1_E5	20_dpr10_gal4_uas_stop_Trpa1_FruFLP1		Following	1	0:04:42.434000	0:04:43.539000
TrpB2_J9	20_dpr10_gal4_uas_stop_Trpa1_FruFLP10		Following	1	35.96	39.87
TrpB3_E7	20_dpr10_gal4_uas_stop_Trpa1_FruFLP11		Following	3	0:00:23.810000	0:00:46.908000
TrpB3_R1	20_dpr10_gal4_uas_stop_Trpa1_FruFLP13		Following	3	0:01:33.844000	0:01:51.386000
TrpB3_H2	20_dpr10_gal4_uas_stop_Trpa1_FruFLP14		Following	1	0:07:39.269000	0:10:00.092000
TrpB3_J7	20_dpr10_gal4_uas_stop_Trpa1_FruFLP15		Following	1	0:01:50.061000	0:01:55.997000
TrpB1_G6	20_dpr10_gal4_uas_stop_Trpa1_FruFLP2		Following	1	0:01:11.248000	0:01:14.307000
TrpB1_H2	20_dpr10_gal4_uas_stop_Trpa1_FruFLP3		Following	1	0:07:56.693000	0:08:03.247000
TrpB1_D6	20_dpr10_gal4_uas_stop_Trpa1_FruFLP4		Following	1	0:02:30.516000	0:03:01.037000
TrpB1_S4	20_dpr10_gal4_uas_stop_Trpa1_FruFLP5		Following	1	0:07:30.894000	0:07:48.857000
TrpB2_B9	20_dpr10_gal4_uas_stop_Trpa1_FruFLP6		Following	3	563.76	600.02
TrpB2_D7	20_dpr10_gal4_uas_stop_Trpa1_FruFLP7		Following	2	460.79	494.1
TrpB2_E3	20_dpr10_gal4_uas_stop_Trpa1_FruFLP8		Following	1	236.7	244.3
TrpB2_D6	20_dpr10_gal4_uas_stop_Trpa1_FruFLP9		Following	1	184.66	188.83
TrpB1_F2	20_dpr11_gal4_uas_stop_Trpa1_FruFLP1		Following	2	0:09:49.816000	0:10:00.070000
TrpB2_C6	20_dpr11_gal4_uas_stop_Trpa1_FruFLP10		Following	1	151.56	154.47
TrpB3_J5	20_dpr11_gal4_uas_stop_Trpa1_FruFLP11		Following	1	0:09:56.737000	0:10:00.186000
TrpB3_P6	20_dpr11_gal4_uas_stop_Trpa1_FruFLP12		Following	1	0:09:49.905000	0:10:00.085000
TrpB3_A6	20_dpr11_gal4_uas_stop_Trpa1_FruFLP13		Following	2	0:09:14.225000	0:10:00.194000
TrpB3_C7	20_dpr11_gal4_uas_stop_Trpa1_FruFLP14		Following	1	0:03:30.992000	0:03:56.161000
TrpB3_J6	20_dpr11_gal4_uas_stop_Trpa1_FruFLP15		Following	2	0:09:31.775000	0:10:00.134000
TrpB1_N1	20_dpr11_gal4_uas_stop_Trpa1_FruFLP2		Following	1	0:05:22.075000	0:05:37.975000
TrpB1_L2	20_dpr11_gal4_uas_stop_Trpa1_FruFLP3		Following	2	0:08:25.009000	0:09:11.532000
TrpB1_P7	20_dpr11_gal4_uas_stop_Trpa1_FruFLP4		Following	5	0:08:57.801000	0:10:00.082000
TrpB1_O4	20_dpr11_gal4_uas_stop_Trpa1_FruFLP5		Following	7	0:05:23.834000	0:10:00.151000
TrpB2_A1	20_dpr11_gal4_uas_stop_Trpa1_FruFLP6		Following	1	300.35	302.94
TrpB2_D5	20_dpr11_gal4_uas_stop_Trpa1_FruFLP7		Following	2	272.94	332.79
TrpB2_R2	20_dpr11_gal4_uas_stop_Trpa1_FruFLP8		Following	1	389.76	416.04
TrpB2_K3	20_dpr11_gal4_uas_stop_Trpa1_FruFLP9		Following	2	311.48	340.52
TrpB1_M8	20_dpr12_gal4_uas_stop_Trpa1_FruFLP1		Following	1	0:09:51.987000	0:10:00.072000
TrpB2_R6	20_dpr12_gal4_uas_stop_Trpa1_FruFLP10		Following	3	591.39	600.11
TrpB3_D9	20_dpr12_gal4_uas_stop_Trpa1_FruFLP11		Following	1	0:09:49.442000	0:10:00.043000
TrpB3_D4	20_dpr12_gal4_uas_stop_Trpa1_FruFLP12		Following	1	0:01:42.527000	0:01:43.811000
TrpB3_S1	20_dpr12_gal4_uas_stop_Trpa1_FruFLP13		Following	2	0:08:17.511000	0:10:00.004000
TrpB3_A2	20_dpr12_gal4_uas_stop_Trpa1_FruFLP14		Following	1	0:07:57.036000	0:08:10.492000
TrpB3_R8	20_dpr12_gal4_uas_stop_Trpa1_FruFLP15		Following	1	0:09:52.134000	0:10:00.075000
TrpB1_H7	20_dpr12_gal4_uas_stop_Trpa1_FruFLP2		Following	1	0:09:53.041000	0:10:00.062000
TrpB1_F7	20_dpr12_gal4_uas_stop_Trpa1_FruFLP3		Following	1	0:09:53.934000	0:10:00.132000
TrpB1_F4	20_dpr12_gal4_uas_stop_Trpa1_FruFLP4		Following	9	0:02:51.893000	0:08:11.883000
TrpB1_C4	20_dpr12_gal4_uas_stop_Trpa1_FruFLP5		Following	2	0:09:12.530000	0:10:00.027000
TrpB2_J2	20_dpr12_gal4_uas_stop_Trpa1_FruFLP6		Following	2	432.51	600.1
TrpB2_P2	20_dpr12_gal4_uas_stop_Trpa1_FruFLP7		Following	2	224.36	600.02
TrpB2_C5	20_dpr12_gal4_uas_stop_Trpa1_FruFLP8		Following	1	594.28	600.11
TrpB2_K5	20_dpr12_gal4_uas_stop_Trpa1_FruFLP9		Following	1	381.05	385.79
TrpB7_Q2	20_dpr14_gal4_uas_stop_Trpa1_FruFLP1		Following	3	586.42	600
TrpB7_J6	20_dpr14_gal4_uas_stop_Trpa1_FruFLP10		Following	2	31.38	600
TrpB7_X7	20_dpr14_gal4_uas_stop_Trpa1_FruFLP11		Following	7	244.32	600
TrpB7_A1	20_dpr14_gal4_uas_stop_Trpa1_FruFLP12		Following	5	47.44	600
TrpB7_B3	20_dpr14_gal4_uas_stop_Trpa1_FruFLP13		Following	4	359.68	600
TrpB7_N6	20_dpr14_gal4_uas_stop_Trpa1_FruFLP14		Following	2	593.35	600
TrpB7_F2	20_dpr14_gal4_uas_stop_Trpa1_FruFLP15		Following	1	597.9	600
TrpB7_D2	20_dpr14_gal4_uas_stop_Trpa1_FruFLP2		Following	2	312.96	332.2
TrpB7_W3	20_dpr14_gal4_uas_stop_Trpa1_FruFLP3		Following	10	472.61	600
TrpB7_L6	20_dpr14_gal4_uas_stop_Trpa1_FruFLP4		Following	1	575.73	600
TrpB7_Q9	20_dpr14_gal4_uas_stop_Trpa1_FruFLP5		Following	1	230.46	237.73
TrpB7_E3	20_dpr14_gal4_uas_stop_Trpa1_FruFLP6		Following	1	100.62	101.36
TrpB7_D3	20_dpr14_gal4_uas_stop_Trpa1_FruFLP7		Following	2	566.14	600
TrpB7_G8	20_dpr14_gal4_uas_stop_Trpa1_FruFLP8		Following	3	505.24	515.58
TrpB7_G1	20_dpr14_gal4_uas_stop_Trpa1_FruFLP9		Following	1	593.89	600
TrpB4_F9	20_Dpr15_gal4_uas_stop_Trpa1_FruFLP1		Following	2	0:02:07.653000	0:02:15.488000
TrpB6_C3	20_dpr15_gal4_uas_stop_Trpa1_FruFLP11		Following	1	0:05:47.932000	0:06:16.020000
TrpB6_H8	20_dpr15_gal4_uas_stop_Trpa1_FruFLP12		Following	1	0:09:18.627000	0:09:25.005000
TrpB6_J4	20_dpr15_gal4_uas_stop_Trpa1_FruFLP13		Following	1	0:00:20.396000	0:00:30.062000
TrpB6_E6	20_dpr15_gal4_uas_stop_Trpa1_FruFLP14		Following	2	0:01:52.470000	0:02:03.991000
TrpB6_D2	20_dpr15_gal4_uas_stop_Trpa1_FruFLP15		Following	1	0:07:53.217000	0:07:59.321000
TrpB6_F6	20_dpr15_gal4_uas_stop_Trpa1_FruFLP16		Following	1	0:04:06.385000	0:04:12.198000
TrpB4_C2	20_Dpr15_gal4_uas_stop_Trpa1_FruFLP2		Following	1	0:01:36.555000	0:01:51.802000
TrpB4_F1	20_Dpr15_gal4_uas_stop_Trpa1_FruFLP3		Following	1	0:00:55.063000	0:01:06.540000
TrpB4_D2	20_Dpr15_gal4_uas_stop_Trpa1_FruFLP4		Following	1	0:09:30.493000	0:10:00.127000
TrpB4_A9	20_Dpr15_gal4_uas_stop_Trpa1_FruFLP5		Following	1	0:03:21.527000	0:03:38.527000
TrpB5_G8	20_dpr15_gal4_uas_stop_Trpa1_FruFLP6		Following	1	0:03:39.627000	0:03:43.960000
TrpB6_D7	20_dpr15_gal4_uas_stop_Trpa1_FruFLP7		Following	2	0:05:07.934000	0:05:48.506000
TrpB6_E7	20_dpr15_gal4_uas_stop_Trpa1_FruFLP8		Following	1	0:09:53.684000	0:10:00.197000
TrpB6_C2	20_dpr15_gal4_uas_stop_Trpa1_FruFLP9		Following	1	0:06:33.307000	0:06:35.971000
TrpB1_N5	20_dpr16_gal4_uas_stop_Trpa1_FruFLP1		Following	1	0:03:56.199000	0:03:58.853000
TrpB2_P5	20_dpr16_gal4_uas_stop_Trpa1_FruFLP10		Following	2	283.27	306.03
TrpB3_F8	20_dpr16_gal4_uas_stop_Trpa1_FruFLP11		Following	1	0:09:52.514000	0:10:00.116000
TrpB3_E1	20_dpr16_gal4_uas_stop_Trpa1_FruFLP12		Following	1	0:07:58.571000	0:08:09.062000
TrpB3_H7	20_dpr16_gal4_uas_stop_Trpa1_FruFLP13		Following	1	0:04:06.698000	0:04:34.410000
TrpB3_A7	20_dpr16_gal4_uas_stop_Trpa1_FruFLP15		Following	2	0:00:48.176000	0:01:01.125000
TrpB1_S5	20_dpr16_gal4_uas_stop_Trpa1_FruFLP2		Following	1	0:09:54.581000	0:10:00.182000
TrpB1_H5	20_dpr16_gal4_uas_stop_Trpa1_FruFLP3		Following	3	0:09:03.822000	0:09:14.944000
TrpB1_D3	20_dpr16_gal4_uas_stop_Trpa1_FruFLP4		Following	1	0:07:06.587000	0:07:07.372000
TrpB1_E6	20_dpr16_gal4_uas_stop_Trpa1_FruFLP5		Following	1	0:02:18.343000	0:02:21.744000
TrpB2_K9	20_dpr16_gal4_uas_stop_Trpa1_FruFLP6		Following	3	136.5	162.57
TrpB2_C4	20_dpr16_gal4_uas_stop_Trpa1_FruFLP7		Following	1	593.13	600.17
TrpB2_R8	20_dpr16_gal4_uas_stop_Trpa1_FruFLP8		Following	2	515.76	525.41
TrpB2_M4	20_dpr16_gal4_uas_stop_Trpa1_FruFLP9		Following	2	253.53	291.61
TrpB4_B3	20_Dpr17_gal4_uas_stop_Trpa1_FruFLP1		Following	1	0:00:58.802000	0:02:19.254000
TrpB4_C5	20_Dpr17_gal4_uas_stop_Trpa1_FruFLP10		Following	1	0:01:48.141000	0:02:00.976000
TrpB5_D9	20_dpr17_gal4_uas_stop_Trpa1_FruFLP11		Following	1	0:05:51.768000	0:06:33.740000
TrpB5_C5	20_dpr17_gal4_uas_stop_Trpa1_FruFLP12		Following	1	0:01:36.785000	0:01:46.005000
TrpB5_C1	20_dpr17_gal4_uas_stop_Trpa1_FruFLP13		Following	2	0:03:17.910000	0:03:27.796000
TrpB5_E7	20_dpr17_gal4_uas_stop_Trpa1_FruFLP14		Following	6	0:02:17.038000	0:03:18.834000
TrpB5_E3	20_dpr17_gal4_uas_stop_Trpa1_FruFLP15		Following	2	0:04:59.503000	0:05:13.154000
TrpB4_E8	20_Dpr17_gal4_uas_stop_Trpa1_FruFLP2		Following	2	0:08:22.070000	0:10:00.163000
TrpB4_E9	20_Dpr17_gal4_uas_stop_Trpa1_FruFLP3		Following	1	0:04:00.733000	0:04:28.561000
TrpB4_F6	20_Dpr17_gal4_uas_stop_Trpa1_FruFLP4		Following	1	0:07:46.822000	0:09:13.355000
TrpB4_E4	20_Dpr17_gal4_uas_stop_Trpa1_FruFLP5		Following	2	0:02:01.897000	0:02:29.653000
TrpB4_C3	20_Dpr17_gal4_uas_stop_Trpa1_FruFLP6		Following	4	0:09:06.336000	0:10:00.016000
TrpB4_F7	20_Dpr17_gal4_uas_stop_Trpa1_FruFLP7		Following	1	0:02:11.344000	0:03:55.908000
TrpB4_B5	20_Dpr17_gal4_uas_stop_Trpa1_FruFLP8		Following	1	0:09:45.509000	0:10:00.120000
TrpB4_B8	20_Dpr17_gal4_uas_stop_Trpa1_FruFLP9		Following	1	0:01:11.937000	0:01:12.346000
TrpB7_G4	20_dpr18_gal4_uas_stop_Trpa1_FruFLP1		Following	2	144.96	600
TrpB7_J8	20_dpr18_gal4_uas_stop_Trpa1_FruFLP10		Following	1	298.97	318.13
TrpB7_H7	20_dpr18_gal4_uas_stop_Trpa1_FruFLP11		Following	6	11.73	600
TrpB7_J9	20_dpr18_gal4_uas_stop_Trpa1_FruFLP12		Following	1	599.26	600
TrpB7_P4	20_dpr18_gal4_uas_stop_Trpa1_FruFLP13		Following	2	66.84	76.53
TrpB7_W2	20_dpr18_gal4_uas_stop_Trpa1_FruFLP14		Following	3	565.29	600
TrpB7_A3	20_dpr18_gal4_uas_stop_Trpa1_FruFLP2		Following	5	214	260.52
TrpB7_X6	20_dpr18_gal4_uas_stop_Trpa1_FruFLP3		Following	1	596.74	600
TrpB7_N8	20_dpr18_gal4_uas_stop_Trpa1_FruFLP4		Following	1	581.21	600
TrpB7_S7	20_dpr18_gal4_uas_stop_Trpa1_FruFLP5		Following	1	132.44	140.26
TrpB7_D5	20_dpr18_gal4_uas_stop_Trpa1_FruFLP6		Following	8	333.75	402.6
TrpB7_T5	20_dpr18_gal4_uas_stop_Trpa1_FruFLP7		Following	1	237.37	239.48
TrpB7_X9	20_dpr18_gal4_uas_stop_Trpa1_FruFLP8		Following	1	433.37	435.67
TrpB7_C7	20_dpr18_gal4_uas_stop_Trpa1_FruFLP9		Following	1	598.76	600
TrpB5_B1	20_dpr2_gal4_uas_stop_Trpa1_FruFLP1		Following	1	0:02:33.717000	0:02:37.642000
TrpB6_B5	20_dpr2_gal4_uas_stop_Trpa1_FruFLP10		Following	2	0:05:19.382000	0:05:28.109000
TrpB6_H7	20_dpr2_gal4_uas_stop_Trpa1_FruFLP11		Following	1	0:07:17.005000	0:07:20.035000
TrpB6_C8	20_dpr2_gal4_uas_stop_Trpa1_FruFLP12		Following	1	0:04:11.838000	0:04:17.791000
TrpB6_B8	20_dpr2_gal4_uas_stop_Trpa1_FruFLP13		Following	1	0:06:05.480000	0:06:30.872000
TrpB6_G6	20_dpr2_gal4_uas_stop_Trpa1_FruFLP14		Following	2	0:02:45.934000	0:03:00.309000
TrpB6_E3	20_dpr2_gal4_uas_stop_Trpa1_FruFLP15		Following	1	0:05:58.005000	0:06:12.106000
TrpB5_G2	20_dpr2_gal4_uas_stop_Trpa1_FruFLP2		Following	9	0:01:19.381000	0:04:27.355000
TrpB5_G5	20_dpr2_gal4_uas_stop_Trpa1_FruFLP3		Following	1	0:04:20.466000	0:04:34.912000
TrpB5_E9	20_dpr2_gal4_uas_stop_Trpa1_FruFLP4		Following	1	0:03:42.969000	0:03:43.653000
TrpB5_D1	20_dpr2_gal4_uas_stop_Trpa1_FruFLP5		Following	3	0:08:48.894000	0:08:57.694000
TrpB6_F4	20_dpr2_gal4_uas_stop_Trpa1_FruFLP6		Following	1	0:09:55.930000	0:10:00.100000
TrpB6_E4	20_dpr2_gal4_uas_stop_Trpa1_FruFLP7		Following	2	0:00:22.017000	0:01:26.047000
TrpB6_D1	20_dpr2_gal4_uas_stop_Trpa1_FruFLP8		Following	1	0:00:49.544000	0:01:00.586000
TrpB6_A2	20_dpr2_gal4_uas_stop_Trpa1_FruFLP9		Following	1	0:00:50.718000	0:01:02.602000
TrpB1_J6	20_dpr3_gal4_uas_stop_Trpa1_FruFLP1		Following	1	0:01:25.139000	0:01:40.525000
TrpB2_R7	20_dpr3_gal4_uas_stop_Trpa1_FruFLP10		Following	2	46.08	56.57
TrpB3_F5	20_dpr3_gal4_uas_stop_Trpa1_FruFLP11		Following	1	0:01:34.202000	0:01:35.613000
TrpB3_C8	20_dpr3_gal4_uas_stop_Trpa1_FruFLP12		Following	1	0:09:57.613000	0:10:00.067000
TrpB3_N9	20_dpr3_gal4_uas_stop_Trpa1_FruFLP13		Following	1	0:02:33.237000	0:02:43.671000
TrpB3_N7	20_dpr3_gal4_uas_stop_Trpa1_FruFLP14		Following	5	0:02:54.164000	0:10:00.138000
TrpB3_J9	20_dpr3_gal4_uas_stop_Trpa1_FruFLP15		Following	1	0:09:53.442000	0:10:00.030000
TrpB1_N7	20_dpr3_gal4_uas_stop_Trpa1_FruFLP2		Following	1	0:00:48.262000	0:00:59.592000
TrpB1_G4	20_dpr3_gal4_uas_stop_Trpa1_FruFLP3		Following	1	0:01:18.840000	0:01:19.087000
TrpB1_D8	20_dpr3_gal4_uas_stop_Trpa1_FruFLP4		Following	1	0:01:20.540000	0:01:28.307000
TrpB1_L1	20_dpr3_gal4_uas_stop_Trpa1_FruFLP5		Following	2	0:09:33.591000	0:10:00.158000
TrpB2_N5	20_dpr3_gal4_uas_stop_Trpa1_FruFLP6		Following	1	291.3	302.97
TrpB2_G4	20_dpr3_gal4_uas_stop_Trpa1_FruFLP7		Following	1	218.76	259.48
TrpB2_N7	20_dpr3_gal4_uas_stop_Trpa1_FruFLP8		Following	1	578.7	600.12
TrpB2_R4	20_dpr3_gal4_uas_stop_Trpa1_FruFLP9		Following	1	260.6	261.05
TrpB7_B9	20_dpr4_gal4_uas_stop_Trpa1_FruFLP1		Following	6	495.88	600
TrpB7_J4	20_dpr4_gal4_uas_stop_Trpa1_FruFLP10		Following	1	581.85	600
TrpB7_S8	20_dpr4_gal4_uas_stop_Trpa1_FruFLP11		Following	3	570.61	600
TrpB7_H8	20_dpr4_gal4_uas_stop_Trpa1_FruFLP12		Following	3	453.96	487.45
TrpB7_E2	20_dpr4_gal4_uas_stop_Trpa1_FruFLP13		Following	9	239.19	600
TrpB7_T7	20_dpr4_gal4_uas_stop_Trpa1_FruFLP14		Following	2	566.66	600
TrpB7_E5	20_dpr4_gal4_uas_stop_Trpa1_FruFLP15		Following	2	99.68	139.37
TrpB7_O1	20_dpr4_gal4_uas_stop_Trpa1_FruFLP2		Following	2	484.73	600
TrpB7_E9	20_dpr4_gal4_uas_stop_Trpa1_FruFLP3		Following	4	542.86	594.86
TrpB7_H4	20_dpr4_gal4_uas_stop_Trpa1_FruFLP4		Following	1	289.73	290.78
TrpB7_P7	20_dpr4_gal4_uas_stop_Trpa1_FruFLP5		Following	4	530.02	600
TrpB7_B7	20_dpr4_gal4_uas_stop_Trpa1_FruFLP6		Following	8	354.44	600
TrpB7_W4	20_dpr4_gal4_uas_stop_Trpa1_FruFLP7		Following	1	576.44	600
TrpB7_V6	20_dpr4_gal4_uas_stop_Trpa1_FruFLP8		Following	2	581.75	600
TrpB7_A7	20_dpr4_gal4_uas_stop_Trpa1_FruFLP9		Following	2	535.44	600
TrpB1_H1	20_dpr5_gal4_uas_stop_Trpa1_FruFLP1		Following	2	0:05:40.568000	0:05:48.731000
TrpB2_O6	20_dpr5_gal4_uas_stop_Trpa1_FruFLP10		Following	2	174.78	198.56
TrpB3_A8	20_dpr5_gal4_uas_stop_Trpa1_FruFLP11		Following	1	0:02:00.192000	0:02:01.795000
TrpB3_J2	20_dpr5_gal4_uas_stop_Trpa1_FruFLP12		Following	3	0:05:27.978000	0:05:51.045000
TrpB3_K3	20_dpr5_gal4_uas_stop_Trpa1_FruFLP13		Following	1	0:06:18.971000	0:06:26.497000
TrpB3_F6	20_dpr5_gal4_uas_stop_Trpa1_FruFLP14		Following	1	0:06:26.174000	0:06:40.397000
TrpB3_O8	20_dpr5_gal4_uas_stop_Trpa1_FruFLP15		Following	2	0:04:01.401000	0:04:14.046000
TrpB1_C8	20_dpr5_gal4_uas_stop_Trpa1_FruFLP2		Following	1	0:05:39.484000	0:05:40.825000
TrpB1_M4	20_dpr5_gal4_uas_stop_Trpa1_FruFLP3		Following	1	0:02:50.033000	0:02:57.525000
TrpB1_M3	20_dpr5_gal4_uas_stop_Trpa1_FruFLP4		Following	1	0:07:05.763000	0:08:13.837000
TrpB1_A6	20_dpr5_gal4_uas_stop_Trpa1_FruFLP5		Following	1	0:03:52.990000	0:04:03.146000
TrpB2_L6	20_dpr5_gal4_uas_stop_Trpa1_FruFLP6		Following	3	239.02	600.04
TrpB2_N2	20_dpr5_gal4_uas_stop_Trpa1_FruFLP7		Following	1	96.14	97.95
TrpB2_B6	20_dpr5_gal4_uas_stop_Trpa1_FruFLP8		Following	1	232.97	235.54
TrpB2_E2	20_dpr5_gal4_uas_stop_Trpa1_FruFLP9		Following	1	179.72	181.83
TrpB7_C3	20_dpr6_gal4_uas_stop_Trpa1_FruFLP1		Following	1	434.29	451.34
TrpB7_P9	20_dpr6_gal4_uas_stop_Trpa1_FruFLP10		Following	1	599.39	600
TrpB7_M5	20_dpr6_gal4_uas_stop_Trpa1_FruFLP11		Following	4	459.37	600
TrpB7_G6	20_dpr6_gal4_uas_stop_Trpa1_FruFLP12		Following	2	146.25	157.97
TrpB7_N4	20_dpr6_gal4_uas_stop_Trpa1_FruFLP13		Following	1	314.63	317.72
TrpB7_O4	20_dpr6_gal4_uas_stop_Trpa1_FruFLP14		Following	1	498.84	502.26
TrpB7_S9	20_dpr6_gal4_uas_stop_Trpa1_FruFLP15		Following	4	535.06	600
TrpB7_R1	20_dpr6_gal4_uas_stop_Trpa1_FruFLP2		Following	1	75.28	78.37
TrpB7_O9	20_dpr6_gal4_uas_stop_Trpa1_FruFLP3		Following	1	225.13	225.68
TrpB7_C6	20_dpr6_gal4_uas_stop_Trpa1_FruFLP4		Following	1	576.52	586.7
TrpB7_L9	20_dpr6_gal4_uas_stop_Trpa1_FruFLP5		Following	2	313.9	315.63
TrpB7_X2	20_dpr6_gal4_uas_stop_Trpa1_FruFLP6		Following	2	591.56	600
TrpB7_U7	20_dpr6_gal4_uas_stop_Trpa1_FruFLP7		Following	1	338.25	344.07
TrpB7_R4	20_dpr6_gal4_uas_stop_Trpa1_FruFLP8		Following	2	231.55	241.27
TrpB7_O3	20_dpr6_gal4_uas_stop_Trpa1_FruFLP9		Following	1	378.63	382.79
TrpB5_F7	20_dpr8_gal4_uas_stop_Trpa1_FruFLP1		Following	3	0:09:22.054000	0:10:00.126000
TrpB6_G2	20_dpr8_gal4_uas_stop_Trpa1_FruFLP10		Following	1	0:06:46.998000	0:07:00.834000
TrpB6_C1	20_dpr8_gal4_uas_stop_Trpa1_FruFLP11		Following	1	0:09:12.006000	0:10:00.086000
TrpB6_C7	20_dpr8_gal4_uas_stop_Trpa1_FruFLP12		Following	1	0:01:23.707000	0:01:31.943000
TrpB6_H6	20_dpr8_gal4_uas_stop_Trpa1_FruFLP13		Following	1	0:04:38.308000	0:04:39.501000
TrpB6_B9	20_dpr8_gal4_uas_stop_Trpa1_FruFLP14		Following	1	0:02:38.090000	0:02:39.161000
TrpB6_F8	20_dpr8_gal4_uas_stop_Trpa1_FruFLP15		Following	5	0:04:16.724000	0:10:00.086000
TrpB5_C7	20_dpr8_gal4_uas_stop_Trpa1_FruFLP2		Following	1	0:08:45.743000	0:08:46.703000
TrpB5_E1	20_dpr8_gal4_uas_stop_Trpa1_FruFLP3		Following	1	0:02:07.303000	0:02:08.010000
TrpB6_B2	20_dpr8_gal4_uas_stop_Trpa1_FruFLP4		Following	2	0:01:53.446000	0:02:02.705000
TrpB6_G1	20_dpr8_gal4_uas_stop_Trpa1_FruFLP5		Following	1	0:05:29.079000	0:05:31.370000
TrpB6_H2	20_dpr8_gal4_uas_stop_Trpa1_FruFLP6		Following	1	0:02:36.490000	0:02:54.286000
TrpB6_A8	20_dpr8_gal4_uas_stop_Trpa1_FruFLP7		Following	2	0:04:42.367000	0:04:54.848000
TrpB6_D5	20_dpr8_gal4_uas_stop_Trpa1_FruFLP8		Following	1	0:09:04.724000	0:09:05.714000
TrpB6_D4	20_dpr8_gal4_uas_stop_Trpa1_FruFLP9		Following	1	0:02:47.105000	0:02:58.170000
TrpB5_G7	20_dpr9_gal4_uas_stop_Trpa1_FruFLP1		Following	2	0:02:15.418000	0:03:30.858000
TrpB6_J2	20_dpr9_gal4_uas_stop_Trpa1_FruFLP10		Following	2	0:07:23.840000	0:10:00.110000
TrpB6_C5	20_dpr9_gal4_uas_stop_Trpa1_FruFLP11		Following	1	0:07:14.336000	0:07:40.873000
TrpB6_E5	20_dpr9_gal4_uas_stop_Trpa1_FruFLP12		Following	4	0:08:45.154000	0:10:00.197000
TrpB6_C9	20_dpr9_gal4_uas_stop_Trpa1_FruFLP13		Following	1	0:02:37.958000	0:02:53.924000
TrpB6_G7	20_dpr9_gal4_uas_stop_Trpa1_FruFLP14		Following	1	0:09:56.384000	0:10:00.102000
TrpB6_E2	20_dpr9_gal4_uas_stop_Trpa1_FruFLP15		Following	1	0:09:58.937000	0:10:00.116000
TrpB5_G9	20_dpr9_gal4_uas_stop_Trpa1_FruFLP2		Following	1	0:09:23.204000	0:09:44.660000
TrpB5_A8	20_dpr9_gal4_uas_stop_Trpa1_FruFLP3		Following	1	0:04:59.346000	0:05:00.717000
TrpB5_F2	20_dpr9_gal4_uas_stop_Trpa1_FruFLP4		Following	1	0:06:25.996000	0:06:32.876000
TrpB5_B4	20_dpr9_gal4_uas_stop_Trpa1_FruFLP5		Following	2	0:01:01.655000	0:01:19.291000
TrpB5_A9	20_dpr9_gal4_uas_stop_Trpa1_FruFLP6		Following	1	0:03:26.484000	0:03:29.814000
TrpB5_B9	20_dpr9_gal4_uas_stop_Trpa1_FruFLP7		Following	1	0:09:38.408000	0:10:00.007000
TrpB5_A1	20_dpr9_gal4_uas_stop_Trpa1_FruFLP8		Following	9	0:02:14.497000	0:07:12.847000
TrpB5_A6	20_dpr9_gal4_uas_stop_Trpa1_FruFLP9		Following	1	0:09:10.098000	0:10:00.062000
TrpB7_O5	20_FruFLP_1		Following	1	205.69	207.89
TrpB7_Q6	20_FruFLP_10		Following	3	333.22	347.64
TrpB7_U6	20_FruFLP_11		Following	1	524.99	528.27
TrpB7_S2	20_FruFLP_12		Following	1	310.17	312.26
TrpB7_V8	20_FruFLP_13		Following	1	171.96	174.17
TrpB7_H2	20_FruFLP_14		Following	1	596.71	600
TrpB7_X8	20_FruFLP_15		Following	1	173.47	196.99
TrpB7_X1	20_FruFLP_2		Following	1	459.72	460.5
TrpB7_R2	20_FruFLP_3		Following	2	393.23	401.74
TrpB7_J1	20_FruFLP_4		Following	1	396.09	408.69
TrpB7_O6	20_FruFLP_5		Following	1	131	134.76
TrpB7_C4	20_FruFLP_6		Following	1	60.04	75.71
TrpB7_C5	20_FruFLP_7		Following	1	386.02	394.49
TrpB7_T8	20_FruFLP_8		Following	1	317.86	319.6
TrpB7_H3	20_FruFLP_9		Following	1	100.55	113.87
TrpB4_A8	20_noGAL4_TrpA1_1		Following	11	0:04:27.533000	0:10:00.051000
TrpB4_F4	20_noGAL4_TrpA1_10		Following	1	0:09:45.514000	0:10:00.088000
TrpB4_A4	20_noGAL4_TrpA1_11		Following	1	0:04:49.084000	0:04:50.862000
TrpB4_D8	20_noGAL4_TrpA1_12		Following	1	0:03:46.730000	0:03:57.577000
TrpB4_C1	20_noGAL4_TrpA1_13		Following	2	0:00:47.882000	0:01:30.308000
TrpB4_D9	20_noGAL4_TrpA1_14		Following	2	0:01:56.674000	0:02:03.930000
TrpB4_E3	20_noGAL4_TrpA1_15		Following	2	0:05:31.618000	0:08:12.598000
TrpB4_A1	20_noGAL4_TrpA1_2		Following	1	0:06:04.118000	0:06:19.142000
TrpB4_D5	20_noGAL4_TrpA1_3		Following	1	0:09:33.377000	0:10:00.048000
TrpB4_C6	20_noGAL4_TrpA1_4		Following	1	0:09:57.874000	0:10:00.111000
TrpB4_E6	20_noGAL4_TrpA1_5		Following	2	0:09:09.350000	0:10:00.188000
TrpB4_A2	20_noGAL4_TrpA1_6		Following	1	0:08:12.146000	0:08:32.129000
TrpB4_E5	20_noGAL4_TrpA1_7		Following	1	0:09:58.283000	0:10:00.018000
TrpB4_C7	20_noGAL4_TrpA1_8		Following	2	0:03:57.219000	0:04:07.656000
TrpB4_B2	20_noGAL4_TrpA1_9		Following	1	0:01:13.391000	0:01:18.312000
TrpB7_W5	20_TrpA1_1		Following	2	251.32	273.25
TrpB7_T4	20_TrpA1_10		Following	1	593.06	600
TrpB7_F9	20_TrpA1_11		Following	2	95.61	100.01
TrpB7_P5	20_TrpA1_12		Following	3	559.09	600
TrpB7_N5	20_TrpA1_13		Following	2	130.14	138.84
TrpB7_U8	20_TrpA1_14		Following	2	419.73	435.81
TrpB7_C2	20_TrpA1_15		Following	1	468.91	478.47
TrpB7_V2	20_TrpA1_2		Following	1	287.61	294.92
TrpB7_U3	20_TrpA1_3		Following	1	338.01	348.44
TrpB7_Q8	20_TrpA1_4		Following	1	147.51	155.2
TrpB7_H1	20_TrpA1_5		Following	1	261.43	266.21
TrpB7_M8	20_TrpA1_6		Following	4	295.96	363.12
TrpB7_D8	20_TrpA1_7		Following	1	217.41	219.14
TrpB7_K2	20_TrpA1_8		Following	1	273.85	293.82
TrpB7_W7	20_TrpA1_9		Following	1	321.72	323.8
TrpB7_A4	30_CSxwCS_1		Following	3	588.24	600
TrpB7_L5	30_CSxwCS_10		Following	3	579.89	600
TrpB7_L7	30_CSxwCS_11		Following	26	245.65	600
TrpB7_J5	30_CSxwCS_12		Following	6	557.66	600
TrpB7_W8	30_CSxwCS_13		Following	1	599.26	600
TrpB7_M4	30_CSxwCS_14		Following	2	588.79	600
TrpB7_A5	30_CSxwCS_15		Following	8	524.3	600
TrpB7_L8	30_CSxwCS_2		Following	1	563.13	600
TrpB7_M6	30_CSxwCS_3		Following	2	556.73	600
TrpB7_L3	30_CSxwCS_4		Following	9	482.43	600
TrpB7_B8	30_CSxwCS_5		Following	10	513.97	600
TrpB7_U9	30_CSxwCS_6		Following	2	577.28	600
TrpB7_M9	30_CSxwCS_7		Following	2	571.78	600
TrpB7_M3	30_CSxwCS_8		Following	8	21.79	600
TrpB7_G5	30_CSxwCS_9		Following	2	592.59	600
TrpB1_P2	30_DIPalpha_gal4_uas_stop_Trpa1_FruFLP1		Following	6	0:00:12.312000	0:10:00.086000
TrpB2_N3	30_DIPalpha_gal4_uas_stop_Trpa1_FruFLP10		Following	5	12.93	600.03
TrpB3_F2	30_DIPalpha_gal4_uas_stop_Trpa1_FruFLP11		Following	1	0:00:00.761000	0:10:00.031000
TrpB3_L4	30_DIPalpha_gal4_uas_stop_Trpa1_FruFLP12		Following	7	0:01:25.949000	0:10:00.071000
TrpB3_G6	30_DIPalpha_gal4_uas_stop_Trpa1_FruFLP13		Following	4	0:08:23.461000	0:10:00.089000
TrpB3_A1	30_DIPalpha_gal4_uas_stop_Trpa1_FruFLP14		Following	12	0:08:06.783000	0:10:00.041000
TrpB3_L3	30_DIPalpha_gal4_uas_stop_Trpa1_FruFLP15		Following	9	0:00:14.810000	0:10:00.148000
TrpB1_E2	30_DIPalpha_gal4_uas_stop_Trpa1_FruFLP2		Following	16	0:03:42.317000	0:10:00.126000
TrpB1_K2	30_DIPalpha_gal4_uas_stop_Trpa1_FruFLP3		Following	8	0:00:26.509000	0:10:00.143000
TrpB1_A3	30_DIPalpha_gal4_uas_stop_Trpa1_FruFLP4		Following	20	0:05:22.022000	0:10:00.008000
TrpB1_J4	30_DIPalpha_gal4_uas_stop_Trpa1_FruFLP5		Following	7	0:08:41.265000	0:10:00.171000
TrpB2_D3	30_DIPalpha_gal4_uas_stop_Trpa1_FruFLP6		Following	2	566.52	600.01
TrpB2_E4	30_DIPalpha_gal4_uas_stop_Trpa1_FruFLP7		Following	8	518.72	600.15
TrpB2_O1	30_DIPalpha_gal4_uas_stop_Trpa1_FruFLP8		Following	1	599.22	600.11
TrpB2_G6	30_DIPalpha_gal4_uas_stop_Trpa1_FruFLP9		Following	2	521.52	600.1
TrpB1_H3	30_DIPbeta_gal4_uas_stop_Trpa1_FruFLP1		Following	5	0:01:19.499000	0:10:00.076000
TrpB2_H2	30_DIPbeta_gal4_uas_stop_Trpa1_FruFLP10		Following	1	592.11	600.14
TrpB3_N8	30_DIPbeta_gal4_uas_stop_Trpa1_FruFLP11		Following	2	0:08:25.045000	0:10:00.153000
TrpB3_O2	30_DIPbeta_gal4_uas_stop_Trpa1_FruFLP12		Following	3	0:00:14.424000	0:10:00.134000
TrpB3_E2	30_DIPbeta_gal4_uas_stop_Trpa1_FruFLP13		Following	1	0:00:01.067000	0:10:00.060000
TrpB3_D6	30_DIPbeta_gal4_uas_stop_Trpa1_FruFLP14		Following	2	0:02:51.833000	0:10:00.171000
TrpB3_M6	30_DIPbeta_gal4_uas_stop_Trpa1_FruFLP15		Following	3	0:08:06.793000	0:10:00.112000
TrpB1_L5	30_DIPbeta_gal4_uas_stop_Trpa1_FruFLP2		Following	5	0:04:21.302000	0:10:00.092000
TrpB1_A9	30_DIPbeta_gal4_uas_stop_Trpa1_FruFLP3		Following	2	0:09:57.078000	0:10:00.026000
TrpB1_B8	30_DIPbeta_gal4_uas_stop_Trpa1_FruFLP4		Following	1	0:09:50.791000	0:10:00.009000
TrpB1_O8	30_DIPbeta_gal4_uas_stop_Trpa1_FruFLP5		Following	4	0:05:32.416000	0:10:00.131000
TrpB2_F3	30_DIPbeta_gal4_uas_stop_Trpa1_FruFLP6		Following	1	541.61	547.23
TrpB2_F2	30_DIPbeta_gal4_uas_stop_Trpa1_FruFLP7		Following	1	585.82	600.11
TrpB2_A6	30_DIPbeta_gal4_uas_stop_Trpa1_FruFLP8		Following	4	527.44	600.2
TrpB2_G2	30_DIPbeta_gal4_uas_stop_Trpa1_FruFLP9		Following	1	2.91	600.11
TrpB1_K5	30_DIPdelta_gal4_uas_stop_Trpa1_FruFLP1		Following	1	0:09:47.094000	0:10:00.078000
TrpB2_H4	30_DIPdelta_gal4_uas_stop_Trpa1_FruFLP10		Following	2	542	600.1
TrPB3_N2	30_DIPdelta_gal4_uas_stop_Trpa1_FruFLP11		Following	1	0:03:15.222000	0:03:21.956000
TrpB3_A3	30_DIPdelta_gal4_uas_stop_Trpa1_FruFLP12		Following	1	0:09:51.147000	0:10:00.098000
TrpB3_J4	30_DIPdelta_gal4_uas_stop_Trpa1_FruFLP13		Following	1	0:09:50.654000	0:10:00.164000
TrpB3_O4	30_DIPdelta_gal4_uas_stop_Trpa1_FruFLP14		Following	1	0:09:31.565000	0:10:00.104000
TrpB3_F1	30_DIPdelta_gal4_uas_stop_Trpa1_FruFLP15		Following	1	0:02:21.352000	0:02:24.596000
TrpB1_A2	30_DIPdelta_gal4_uas_stop_Trpa1_FruFLP2		Following	2	0:09:30.825000	0:10:00.071000
TrpB1_A8	30_DIPdelta_gal4_uas_stop_Trpa1_FruFLP3		Following	1	0:08:09.533000	0:10:00.183000
TrpB1_C7	30_DIPdelta_gal4_uas_stop_Trpa1_FruFLP4		Following	1	0:04:22.810000	0:04:24.531000
TrpB1_H4	30_DIPdelta_gal4_uas_stop_Trpa1_FruFLP5		Following	2	0:04:36.581000	0:04:53.359000
TrpB2_E8	30_DIPdelta_gal4_uas_stop_Trpa1_FruFLP6		Following	1	593.63	600.08
TrpB2_N6	30_DIPdelta_gal4_uas_stop_Trpa1_FruFLP7		Following	2	525.17	600.03
TrpB2_J1	30_DIPdelta_gal4_uas_stop_Trpa1_FruFLP8		Following	1	583.92	600
TrpB2_H8	30_DIPdelta_gal4_uas_stop_Trpa1_FruFLP9		Following	2	144.52	160.94
TrpB1_K9	30_DIPepsilon_gal4_uas_stop_Trpa1_FruFLP1		Following	1	0:04:59.452000	0:05:00.233000
TrpB2_D8	30_DIPepsilon_gal4_uas_stop_Trpa1_FruFLP10		Following	1	98.21	106.49
TrpB3_B6	30_DIPepsilon_gal4_uas_stop_Trpa1_FruFLP11		Following	1	0:05:45.970000	0:05:54.224000
TrpB3_N4	30_DIPepsilon_gal4_uas_stop_Trpa1_FruFLP12		Following	3	0:09:33.267000	0:10:00.020000
TrpB3_P7	30_DIPepsilon_gal4_uas_stop_Trpa1_FruFLP13		Following	2	0:02:34.949000	0:02:40.645000
TrpB3_G5	30_DIPepsilon_gal4_uas_stop_Trpa1_FruFLP14		Following	3	0:09:47.816000	0:10:00.174000
TrpB3_D7	30_DIPepsilon_gal4_uas_stop_Trpa1_FruFLP15		Following	1	0:00:01.041000	0:10:00.033000
TrpB1_C1	30_DIPepsilon_gal4_uas_stop_Trpa1_FruFLP2		Following	2	0:00:26.379000	0:00:51.506000
TrpB1_R3	30_DIPepsilon_gal4_uas_stop_Trpa1_FruFLP3		Following	1	0:04:10.686000	0:04:45.908000
TrpB1_R9	30_DIPepsilon_gal4_uas_stop_Trpa1_FruFLP4		Following	1	0:02:15.633000	0:03:17.425000
TrpB1_S3	30_DIPepsilon_gal4_uas_stop_Trpa1_FruFLP5		Following	1	0:09:52.385000	0:10:00.101000
TrpB2_G7	30_DIPepsilon_gal4_uas_stop_Trpa1_FruFLP6		Following	1	576.48	600.09
TrpB2_E5	30_DIPepsilon_gal4_uas_stop_Trpa1_FruFLP7		Following	1	560.5	600.33
TrpB2_P1	30_DIPepsilon_gal4_uas_stop_Trpa1_FruFLP8		Following	5	380.05	600.15
TrpB2_O9	30_DIPepsilon_gal4_uas_stop_Trpa1_FruFLP9		Following	1	578.74	600.13
TrpB1_R4	30_DIPeta_gal4_uas_stop_Trpa1_FruFLP1		Following	1	0:09:42.486000	0:10:00.181000
TrpB2_J7	30_DIPeta_gal4_uas_stop_Trpa1_FruFLP10		Following	3	576.14	600.06
TrpB3_C3	30_DIPeta_gal4_uas_stop_Trpa1_FruFLP11		Following	1	0:03:31.598000	0:03:53.222000
TrpB3_K5	30_DIPeta_gal4_uas_stop_Trpa1_FruFLP12		Following	1	0:09:59.319000	0:10:00.172000
TrpB3_L8	30_DIPeta_gal4_uas_stop_Trpa1_FruFLP13		Following	1	0:09:09.069000	0:10:00.110000
TrpB3_P4	30_DIPeta_gal4_uas_stop_Trpa1_FruFLP14		Following	1	0:09:58.787000	0:10:00.198000
TrpB3_L6	30_DIPeta_gal4_uas_stop_Trpa1_FruFLP15		Following	1	0:00:00.454000	0:10:00.163000
TrpB1_P5	30_DIPeta_gal4_uas_stop_Trpa1_FruFLP2		Following	3	0:09:27.157000	0:10:00.096000
TrpB1_N4	30_DIPeta_gal4_uas_stop_Trpa1_FruFLP3		Following	2	0:08:38.254000	0:08:49.308000
TrpB1_N9	30_DIPeta_gal4_uas_stop_Trpa1_FruFLP4		Following	6	0:06:03.155000	0:08:52.361000
TrpB1_E1	30_DIPeta_gal4_uas_stop_Trpa1_FruFLP5		Following	2	0:07:26.809000	0:07:33.188000
TrpB2_K4	30_DIPeta_gal4_uas_stop_Trpa1_FruFLP6		Following	1	580.66	583.68
TrpB2_N1	30_DIPeta_gal4_uas_stop_Trpa1_FruFLP7		Following	1	597.96	600.08
TrpB2_M6	30_DIPeta_gal4_uas_stop_Trpa1_FruFLP8		Following	2	580.7	600.1
TrpB2_D9	30_DIPeta_gal4_uas_stop_Trpa1_FruFLP9		Following	1	591.39	600.03
TrpB1_G5	30_DIPgamma_gal4_uas_stop_Trpa1_FruFLP1		Following	2	0:09:36.877000	0:10:00.119000
TrpB2_D4	30_DIPgamma_gal4_uas_stop_Trpa1_FruFLP10		Following	1	127.24	600.04
TrpB3_K8	30_DIPgamma_gal4_uas_stop_Trpa1_FruFLP11		Following	1	0:09:58.332000	0:10:00.160000
TrpB3_G9	30_DIPgamma_gal4_uas_stop_Trpa1_FruFLP12		Following	1	0:09:41.497000	0:10:00.148000
TrpB3_O7	30_DIPgamma_gal4_uas_stop_Trpa1_FruFLP13		Following	1	0:09:35.808000	0:10:00.185000
TrpB3_D5	30_DIPgamma_gal4_uas_stop_Trpa1_FruFLP14		Following	1	0:09:59.349000	0:10:00.127000
TrpB3_G3	30_DIPgamma_gal4_uas_stop_Trpa1_FruFLP15		Following	1	0:09:42.064000	0:10:00.173000
TrpB1_B9	30_DIPgamma_gal4_uas_stop_Trpa1_FruFLP2		Following	1	0:09:55.498000	0:10:00.080000
TrpB1_J5	30_DIPgamma_gal4_uas_stop_Trpa1_FruFLP3		Following	3	0:09:37.825000	0:10:00.045000
TrpB1_D9	30_DIPgamma_gal4_uas_stop_Trpa1_FruFLP4		Following	6	0:09:16.753000	0:10:00.079000
TrpB1_M7	30_DIPgamma_gal4_uas_stop_Trpa1_FruFLP5		Following	1	0:09:44.315000	0:10:00.145000
TrpB2_D2	30_DIPgamma_gal4_uas_stop_Trpa1_FruFLP6		Following	1	594.67	600.1
TrpB2_J5	30_DIPgamma_gal4_uas_stop_Trpa1_FruFLP7		Following	1	587.85	600.03
TrpB2_L7	30_DIPgamma_gal4_uas_stop_Trpa1_FruFLP8		Following	1	599.82	600.18
TrpB2_O2	30_DIPgamma_gal4_uas_stop_Trpa1_FruFLP9		Following	1	599.75	600.08
TrpB6_D8	30_dipTheta_gal4_uas_stop_TrpA1_ FruFLP14		Following	9	0:08:24.098000	0:10:00.060000
TrpB6_F5	30_dipTheta_gal4_uas_stop_TrpA1_ FruFLP15		Following	14	0:07:43.610000	0:10:00.067000
TrpB5_B6	30_dipTheta_gal4_uas_stop_TrpA1_FruFLP1		Following	1	0:09:59.476000	0:10:00.196000
TrpB5_B8	30_dipTheta_gal4_uas_stop_TrpA1_FruFLP10		Following	15	0:06:13.179000	0:10:00.038000
TrpB5_C2	30_dipTheta_gal4_uas_stop_TrpA1_FruFLP11		Following	2	0:09:57.150000	0:10:00.146000
TrpB5_H8	30_dipTheta_gal4_uas_stop_TrpA1_FruFLP12		Following	28	0:07:24.049000	0:10:00.136000
TrpB5_E6	30_dipTheta_gal4_uas_stop_TrpA1_FruFLP13		Following	16	0:06:08.706000	0:10:00.013000
TrpB5_F6	30_dipTheta_gal4_uas_stop_TrpA1_FruFLP2		Following	22	0:05:03.197000	0:10:00.119000
TrpB5_F5	30_dipTheta_gal4_uas_stop_TrpA1_FruFLP3		Following	16	0:08:20.093000	0:10:00.163000
TrpB5_H9	30_dipTheta_gal4_uas_stop_TrpA1_FruFLP4		Following	10	0:08:06.528000	0:10:00.136000
TrpB5_A4	30_dipTheta_gal4_uas_stop_TrpA1_FruFLP5		Following	6	0:07:12.176000	0:10:00.141000
TrpB5_B3	30_dipTheta_gal4_uas_stop_TrpA1_FruFLP6		Following	1	0:09:58.194000	0:10:00.072000
TrpB5_F3	30_dipTheta_gal4_uas_stop_TrpA1_FruFLP7		Following	1	0:09:57.627000	0:10:00.145000
TrpB5_F8	30_dipTheta_gal4_uas_stop_TrpA1_FruFLP8		Following	6	0:09:41.100000	0:10:00.113000
TrpB5_D5	30_dipTheta_gal4_uas_stop_TrpA1_FruFLP9		Following	10	0:08:26.192000	0:10:00.155000
TrpB1_R8	30_DIPzeta_gal4_uas_stop_Trpa1_FruFLP1		Following	3	0:09:41.427000	0:10:00.051000
TrpB2_A7	30_DIPzeta_gal4_uas_stop_Trpa1_FruFLP10		Following	2	519.32	600.15
TrpB3_N1	30_DIPzeta_gal4_uas_stop_Trpa1_FruFLP11		Following	4	0:09:32.075000	0:10:00.044000
TrpB3_O3	30_DIPzeta_gal4_uas_stop_Trpa1_FruFLP12		Following	1	0:09:54.148000	0:10:00.035000
TrpB3_F3	30_DIPzeta_gal4_uas_stop_Trpa1_FruFLP13		Following	2	0:06:33.083000	0:06:37.559000
TrpB3_H6	30_DIPzeta_gal4_uas_stop_Trpa1_FruFLP14		Following	1	0:09:59.445000	0:10:00.004000
TrpB3_S6	30_DIPzeta_gal4_uas_stop_Trpa1_FruFLP15		Following	1	0:09:50.082000	0:10:00.132000
TrpB1_G9	30_DIPzeta_gal4_uas_stop_Trpa1_FruFLP2		Following	2	0:01:03.384000	0:01:42.014000
TrpB1_L6	30_DIPzeta_gal4_uas_stop_Trpa1_FruFLP3		Following	1	0:09:46.063000	0:10:00.081000
TrpB1_J3	30_DIPzeta_gal4_uas_stop_Trpa1_FruFLP4		Following	1	0:01:31.233000	0:01:47.970000
TrpB1_J7	30_DIPzeta_gal4_uas_stop_Trpa1_FruFLP5		Following	2	0:02:06.772000	0:02:15.929000
TrpB2_F4	30_DIPzeta_gal4_uas_stop_Trpa1_FruFLP6		Following	1	599.4	600.16
TrpB2_P8	30_DIPzeta_gal4_uas_stop_Trpa1_FruFLP7		Following	1	596.67	600.02
TrpB2_A8	30_DIPzeta_gal4_uas_stop_Trpa1_FruFLP8		Following	1	591.32	600.03
TrpB2_L5	30_DIPzeta_gal4_uas_stop_Trpa1_FruFLP9		Following	1	595.86	600.04
TrpB1_M1	30_dpr1_gal4_uas_stop_Trpa1_FruFLP1		Following	1	0:09:59.235000	0:10:00.145000
TrpB2_A2	30_dpr1_gal4_uas_stop_Trpa1_FruFLP10		Following	1	158.86	166.94
TrpB3_F4	30_dpr1_gal4_uas_stop_Trpa1_FruFLP11		Following	1	0:06:03.581000	0:06:44.565000
TrpB3_H1	30_dpr1_gal4_uas_stop_Trpa1_FruFLP12		Following	1	0:09:56.816000	0:10:00.086000
TrpB3_A9	30_dpr1_gal4_uas_stop_Trpa1_FruFLP13		Following	7	0:04:37.003000	0:10:00.095000
TrpB3_B4	30_dpr1_gal4_uas_stop_Trpa1_FruFLP14		Following	1	0:09:55.084000	0:10:00.192000
TrpB3_R9	30_dpr1_gal4_uas_stop_Trpa1_FruFLP15		Following	1	0:09:38.807000	0:10:00.077000
TrpB1_O1	30_dpr1_gal4_uas_stop_Trpa1_FruFLP2		Following	2	0:09:28.408000	0:10:00.197000
TrpB1_C9	30_dpr1_gal4_uas_stop_Trpa1_FruFLP3		Following	1	0:09:59.350000	0:10:00.322000
TrpB1_S1	30_dpr1_gal4_uas_stop_Trpa1_FruFLP4		Following	1	0:01:00.982000	0:02:02.543000
TrpB1_N2	30_dpr1_gal4_uas_stop_Trpa1_FruFLP5		Following	7	0:08:01.661000	0:10:00.078000
TrpB2_M3	30_dpr1_gal4_uas_stop_Trpa1_FruFLP6		Following	23	59.31	600.09
TrpB2_F5	30_dpr1_gal4_uas_stop_Trpa1_FruFLP7		Following	7	434.03	600.19
TrpB2_M5	30_dpr1_gal4_uas_stop_Trpa1_FruFLP8		Following	12	180.57	600.05
TrpB2_P6	30_dpr1_gal4_uas_stop_Trpa1_FruFLP9		Following	4	14.26	600.12
TrpB1_K1	30_dpr10_gal4_uas_stop_Trpa1_FruFLP1		Following	14	0:07:25.470000	0:10:00.188000
TrpB2_L4	30_dpr10_gal4_uas_stop_Trpa1_FruFLP10		Following	3	19.41	600.78
TrpB3_H4	30_dpr10_gal4_uas_stop_Trpa1_FruFLP11		Following	11	0:07:46.406000	0:10:00.083000
TrpB3_J8	30_dpr10_gal4_uas_stop_Trpa1_FruFLP12		Following	2	0:09:33.136000	0:10:00.079000
TrpB3_B5	30_dpr10_gal4_uas_stop_Trpa1_FruFLP13		Following	15	0:04:49.581000	0:10:00.107000
TrpB3_M1	30_dpr10_gal4_uas_stop_Trpa1_FruFLP14		Following	9	0:00:34.849000	0:10:00.183000
TrpB3_B3	30_dpr10_gal4_uas_stop_Trpa1_FruFLP15		Following	11	0:01:53.705000	0:10:00.114000
TrpB1_E9	30_dpr10_gal4_uas_stop_Trpa1_FruFLP2		Following	1	0:01:25.868000	0:10:00.078000
TrpB1_R1	30_dpr10_gal4_uas_stop_Trpa1_FruFLP3		Following	11	0:01:12.620000	0:10:00.009000
TrpB1_N8	30_dpr10_gal4_uas_stop_Trpa1_FruFLP4		Following	7	0:02:42.398000	0:10:00.125000
TrpB1_D1	30_dpr10_gal4_uas_stop_Trpa1_FruFLP5		Following	9	0:00:16.764000	0:10:00.049000
TrpB2_K8	30_dpr10_gal4_uas_stop_Trpa1_FruFLP6		Following	1	1.22	600.14
TrpB2_B7	30_dpr10_gal4_uas_stop_Trpa1_FruFLP7		Following	4	10.63	600.06
TrpB2_B1	30_dpr10_gal4_uas_stop_Trpa1_FruFLP8		Following	10	143.11	600.03
TrpB2_S2	30_dpr10_gal4_uas_stop_Trpa1_FruFLP9		Following	16	256.94	600.19
TrpB1_L7	30_dpr11_gal4_uas_stop_Trpa1_FruFLP1		Following	1	0:09:58.266000	0:10:00.181000
TrpB2_K2	30_dpr11_gal4_uas_stop_Trpa1_FruFLP10		Following	14	526.42	600.02
TrpB3_R2	30_dpr11_gal4_uas_stop_Trpa1_FruFLP11		Following	20	0:04:58.194000	0:10:00.025000
TrpB3_P9	30_dpr11_gal4_uas_stop_Trpa1_FruFLP12		Following	22	0:08:25.107000	0:10:00.125000
TrpB3_N6	30_dpr11_gal4_uas_stop_Trpa1_FruFLP13		Following	3	0:09:51.664000	0:10:00.041000
TrpB3_R4	30_dpr11_gal4_uas_stop_Trpa1_FruFLP14		Following	1	0:09:45.846000	0:10:00.091000
TrpB3_R5	30_dpr11_gal4_uas_stop_Trpa1_FruFLP15		Following	3	0:09:56.286000	0:10:00.121000
TrpB1_F1	30_dpr11_gal4_uas_stop_Trpa1_FruFLP2		Following	1	0:09:32.892000	0:10:00.073000
TrpB1_B5	30_dpr11_gal4_uas_stop_Trpa1_FruFLP3		Following	15	0:06:24.943000	0:10:00.123000
TrpB1_M5	30_dpr11_gal4_uas_stop_Trpa1_FruFLP4		Following	2	0:09:31.394000	0:10:00.127000
TrpB1_M9	30_dpr11_gal4_uas_stop_Trpa1_FruFLP5		Following	4	0:09:16.551000	0:10:00.067000
TrpB2_M1	30_dpr11_gal4_uas_stop_Trpa1_FruFLP6		Following	17	55.64	600.06
TrpB2_P9	30_dpr11_gal4_uas_stop_Trpa1_FruFLP7		Following	24	442.58	600.06
TrpB2_J8	30_dpr11_gal4_uas_stop_Trpa1_FruFLP8		Following	1	598.93	600.01
TrpB2_K7	30_dpr11_gal4_uas_stop_Trpa1_FruFLP9		Following	31	83.91	600.08
TrpB1_D7	30_dpr12_gal4_uas_stop_Trpa1_FruFLP1		Following	3	0:00:05.045000	0:10:00.180000
TrpB2_E1	30_dpr12_gal4_uas_stop_Trpa1_FruFLP10		Following	2	64.69	600.09
TrpB3_E6	30_dpr12_gal4_uas_stop_Trpa1_FruFLP11		Following	6	0:01:17.554000	0:10:00.188000
TrpB3_B7	30_dpr12_gal4_uas_stop_Trpa1_FruFLP12		Following	6	0:00:11.038000	0:10:00.112000
TrpB3_P1	30_dpr12_gal4_uas_stop_Trpa1_FruFLP14		Following	4	0:02:30.410000	0:10:00.109000
TrpB1_A1	30_dpr12_gal4_uas_stop_Trpa1_FruFLP2		Following	21	0:06:27.394000	0:10:00.016000
TrpB1_G8	30_dpr12_gal4_uas_stop_Trpa1_FruFLP3		Following	1	0:09:50.342000	0:10:00.193000
TrpB1_F9	30_dpr12_gal4_uas_stop_Trpa1_FruFLP4		Following	3	0:00:40.349000	0:10:00.018000
TrpB1_F5	30_dpr12_gal4_uas_stop_Trpa1_FruFLP5		Following	6	0:00:27.538000	0:10:00.096000
TrpB2_P3	30_dpr12_gal4_uas_stop_Trpa1_FruFLP6		Following	5	527.78	600.07
TrpB2_A4	30_dpr12_gal4_uas_stop_Trpa1_FruFLP7		Following	7	20.61	600.12
TrpB2_B3	30_dpr12_gal4_uas_stop_Trpa1_FruFLP8		Following	2	49.17	600.1
TrpB2_C1	30_dpr12_gal4_uas_stop_Trpa1_FruFLP9		Following	7	136.34	600
TrpB7_R6	30_dpr14_gal4_uas_stop_TrpA1_ FruFLP1		Following	2	532.14	600
TrpB7_S5	30_dpr14_gal4_uas_stop_TrpA1_ FruFLP10		Following	9	525.68	600
TrpB7_L1	30_dpr14_gal4_uas_stop_TrpA1_ FruFLP11		Following	22	433.46	600
TrpB7_W9	30_dpr14_gal4_uas_stop_TrpA1_ FruFLP12		Following	9	208.27	600
TrpB7_H9	30_dpr14_gal4_uas_stop_TrpA1_ FruFLP13		Following	2	572.47	600
TrpB7_O8	30_dpr14_gal4_uas_stop_TrpA1_ FruFLP14		Following	1	564.21	600
TrpB7_H6	30_dpr14_gal4_uas_stop_TrpA1_ FruFLP15		Following	6	99.18	600
TrpB7_D4	30_dpr14_gal4_uas_stop_TrpA1_ FruFLP2		Following	35	263.84	600
TrpB7_G3	30_dpr14_gal4_uas_stop_TrpA1_ FruFLP3		Following	4	577.32	600
TrpB7_G2	30_dpr14_gal4_uas_stop_TrpA1_ FruFLP4		Following	9	511.67	600
TrpB7_U2	30_dpr14_gal4_uas_stop_TrpA1_ FruFLP5		Following	11	149.5	600
TrpB7_Y1	30_dpr14_gal4_uas_stop_TrpA1_ FruFLP6		Following	2	579	600
TrpB7_D9	30_dpr14_gal4_uas_stop_TrpA1_ FruFLP7		Following	7	31.91	600
TrpB7_Q4	30_dpr14_gal4_uas_stop_TrpA1_ FruFLP9		Following	2	410.85	600
TrpB5_D3	30_dpr15_gal4_uas_stop_TrpA1_6		Following	1	0:09:57.389000	0:10:00.024000
TrpB5_H6	30_dpr15_gal4_uas_stop_TrpA1_7		Following	3	0:09:54.167000	0:10:00.124000
TrpB4_A6	30_Dpr15_gal4_uas_stop_Trpa1_FruFLP1		Following	13	0:07:40.170000	0:10:00.102000
TrpB6_A7	30_dpr15_gal4_uas_stop_Trpa1_FruFLP10		Following	25	0:06:10.524000	0:10:00.057000
TrpB6_D3	30_dpr15_gal4_uas_stop_Trpa1_FruFLP11		Following	14	0:08:33.041000	0:10:00.018000
TrpB6_J5	30_dpr15_gal4_uas_stop_Trpa1_FruFLP12		Following	1	0:09:57.878000	0:10:00.089000
TrpB6_H9	30_dpr15_gal4_uas_stop_Trpa1_FruFLP13		Following	4	0:09:44.661000	0:10:00.003000
TrpB6_A9	30_dpr15_gal4_uas_stop_Trpa1_FruFLP14		Following	2	0:08:52.287000	0:10:00.041000
TrpB6_B6	30_dpr15_gal4_uas_stop_Trpa1_FruFLP15		Following	11	0:05:07.226000	0:10:00.094000
TrpB4_G1	30_Dpr15_gal4_uas_stop_Trpa1_FruFLP2		Following	4	0:09:13.406000	0:10:00.163000
TrpB4_E7	30_Dpr15_gal4_uas_stop_Trpa1_FruFLP3		Following	4	0:08:56.578000	0:10:00.177000
TrpB4_C9	30_Dpr15_gal4_uas_stop_Trpa1_FruFLP4		Following	16	0:04:39.136000	0:10:00.030000
TrpB4_A5	30_Dpr15_gal4_uas_stop_Trpa1_FruFLP5		Following	8	0:08:58.603000	0:10:00.008000
TrpB6_E9	30_dpr15_gal4_uas_stop_Trpa1_FruFLP8		Following	2	0:09:47.442000	0:10:00.033000
TrpB6_B1	30_dpr15_gal4_uas_stop_Trpa1_FruFLP9		Following	14	0:02:08.796000	0:10:00.020000
TrpB1_K7	30_dpr16_gal4_uas_stop_Trpa1_FruFLP1		Following	2	0:09:07.685000	0:10:00.054000
TrpB2_R1	30_dpr16_gal4_uas_stop_Trpa1_FruFLP10		Following	3	557.97	600.13
TrpB3_D8	30_dpr16_gal4_uas_stop_Trpa1_FruFLP11		Following	7	0:08:49.137000	0:10:00.165000
TrpB3_R6	30_dpr16_gal4_uas_stop_Trpa1_FruFLP12		Following	6	0:08:21.764000	0:10:00.113000
TrpB3_C5	30_dpr16_gal4_uas_stop_Trpa1_FruFLP13		Following	18	0:08:06.933000	0:10:00.049000
TrpB3_D3	30_dpr16_gal4_uas_stop_Trpa1_FruFLP14		Following	6	0:08:32.987000	0:10:00.104000
TrpB3_C1	30_dpr16_gal4_uas_stop_Trpa1_FruFLP15		Following	10	0:07:25.386000	0:10:00.075000
TrpB1_J1	30_dpr16_gal4_uas_stop_Trpa1_FruFLP2		Following	2	0:09:50.677000	0:10:00.143000
TrpB1_B7	30_dpr16_gal4_uas_stop_Trpa1_FruFLP3		Following	8	0:08:25.896000	0:10:00.091000
TrpB1_G7	30_dpr16_gal4_uas_stop_Trpa1_FruFLP4		Following	1	0:05:01.195000	0:05:02.008000
TrpB1_C3	30_dpr16_gal4_uas_stop_Trpa1_FruFLP5		Following	1	0:09:58.027000	0:10:00.010000
TrpB2_L1	30_dpr16_gal4_uas_stop_Trpa1_FruFLP6		Following	2	592.09	600.16
TrpB2_L8	30_dpr16_gal4_uas_stop_Trpa1_FruFLP7		Following	2	583.23	600.02
TrpB2_N9	30_dpr16_gal4_uas_stop_Trpa1_FruFLP8		Following	11	480.01	600.19
TrpB2_C8	30_dpr16_gal4_uas_stop_Trpa1_FruFLP9		Following	9	53.35	600
TrpB4_A7	30_Dpr17_gal4_uas_stop_Trpa1_FruFLP1		Following	7	0:06:59.170000	0:10:00.151000
TrpB4_D4	30_Dpr17_gal4_uas_stop_Trpa1_FruFLP10		Following	2	0:09:04.034000	0:10:00.050000
TrpB5_C4	30_dpr17_gal4_uas_stop_TrpA1_FruFLP11		Following	12	0:06:17.440000	0:10:00.069000
TrpB5_H2	30_dpr17_gal4_uas_stop_TrpA1_FruFLP12		Following	4	0:07:34.970000	0:08:27.717000
TrpB5_H7	30_dpr17_gal4_uas_stop_TrpA1_FruFLP13		Following	1	0:09:51.711000	0:10:00.112000
TrpB5_E5	30_dpr17_gal4_uas_stop_TrpA1_FruFLP14		Following	6	0:09:11.020000	0:10:00.135000
TrpB6_J6	30_dpr17_gal4_uas_stop_Trpa1_FruFLP15		Following	1	0:09:58.292000	0:10:00.197000
TrpB4_D6	30_Dpr17_gal4_uas_stop_Trpa1_FruFLP2		Following	2	0:09:37.347000	0:10:00.071000
TrpB4_D3	30_Dpr17_gal4_uas_stop_Trpa1_FruFLP3		Following	3	0:09:38.470000	0:10:00.169000
TrpB4_E1	30_Dpr17_gal4_uas_stop_Trpa1_FruFLP4		Following	11	0:03:09.181000	0:10:00.123000
TrpB4_B7	30_Dpr17_gal4_uas_stop_Trpa1_FruFLP5		Following	8	0:01:02.162000	0:10:00.081000
TrpB4_C4	30_Dpr17_gal4_uas_stop_Trpa1_FruFLP6		Following	6	0:08:26.075000	0:10:00.148000
TrpB4_G5	30_Dpr17_gal4_uas_stop_Trpa1_FruFLP7		Following	11	0:00:35.519000	0:10:00.175000
TrpB4_B6	30_Dpr17_gal4_uas_stop_Trpa1_FruFLP8		Following	1	0:07:33.579000	0:10:00.185000
TrpB4_F3	30_Dpr17_gal4_uas_stop_Trpa1_FruFLP9		Following	4	0:09:24.822000	0:10:00.075000
TrpB7_F8	30_dpr18_gal4_uas_stop_TrpA1_ FruFLP1		Following	8	540.66	600
TrpB7_M7	30_dpr18_gal4_uas_stop_TrpA1_ FruFLP10		Following	2	320.21	361.78
TrpB7_K6	30_dpr18_gal4_uas_stop_TrpA1_ FruFLP11		Following	1	360.71	369.68
TrpB7_R8	30_dpr18_gal4_uas_stop_TrpA1_ FruFLP12		Following	5	519.98	600
TrpB7_J2	30_dpr18_gal4_uas_stop_TrpA1_ FruFLP13		Following	1	583.92	600
TrpB7_B5	30_dpr18_gal4_uas_stop_TrpA1_ FruFLP14		Following	4	572.01	600
TrpB7_N1	30_dpr18_gal4_uas_stop_TrpA1_ FruFLP15		Following	1	593.65	600
TrpB7_T9	30_dpr18_gal4_uas_stop_TrpA1_ FruFLP2		Following	1	596.36	600
TrpB7_D1	30_dpr18_gal4_uas_stop_TrpA1_ FruFLP3		Following	1	597.35	600
TrpB7_V5	30_dpr18_gal4_uas_stop_TrpA1_ FruFLP4		Following	1	570.06	600
TrpB7_N2	30_dpr18_gal4_uas_stop_TrpA1_ FruFLP5		Following	3	78.6	125.49
TrpB7_Q7	30_dpr18_gal4_uas_stop_TrpA1_ FruFLP6		Following	36	301.77	600
TrpB7_P3	30_dpr18_gal4_uas_stop_TrpA1_ FruFLP7		Following	14	52.78	600
TrpB7_S1	30_dpr18_gal4_uas_stop_TrpA1_ FruFLP8		Following	4	351.15	600
TrpB7_W6	30_dpr18_gal4_uas_stop_TrpA1_ FruFLP9		Following	1	505.74	600
TrpB6_D9	30_dpr2_gal4_uas_stop_TrpA1_ FruFLP10		Following	8	0:08:53.532000	0:10:00.032000
TrpB6_A6	30_dpr2_gal4_uas_stop_TrpA1_ FruFLP11		Following	3	0:08:34.724000	0:10:00.101000
TrpB6_A3	30_dpr2_gal4_uas_stop_TrpA1_ FruFLP12		Following	1	0:09:37.554000	0:10:00.024000
TrpB6_G3	30_dpr2_gal4_uas_stop_TrpA1_ FruFLP13		Following	2	0:09:08.211000	0:10:00.001000
TrpB6_A5	30_dpr2_gal4_uas_stop_TrpA1_ FruFLP14		Following	1	0:09:59.636000	0:10:00.151000
TrpB6_G8	30_dpr2_gal4_uas_stop_TrpA1_ FruFLP15		Following	1	0:09:50.682000	0:10:00.206000
TrpB6_G5	30_dpr2_gal4_uas_stop_TrpA1_ FruFLP7		Following	1	0:09:57.031000	0:10:00.056000
TrpB6_E1	30_dpr2_gal4_uas_stop_TrpA1_ FruFLP8		Following	1	0:09:46.474000	0:10:00.130000
TrpB6_A1	30_dpr2_gal4_uas_stop_TrpA1_ FruFLP9		Following	2	0:09:53.729000	0:10:00.033000
TrpB5_D6	30_dpr2_gal4_uas_stop_TrpA1_FruFLP1		Following	3	0:09:50.077000	0:10:00.019000
TrpB5_H1	30_dpr2_gal4_uas_stop_TrpA1_FruFLP2		Following	21	0:05:51.135000	0:10:00.097000
TrpB5_H5	30_dpr2_gal4_uas_stop_TrpA1_FruFLP3		Following	1	0:09:17.722000	0:10:00.193000
TrpB5_C3	30_dpr2_gal4_uas_stop_TrpA1_FruFLP4		Following	2	0:09:44.037000	0:10:00.008000
TrpB5_B7	30_dpr2_gal4_uas_stop_TrpA1_FruFLP5		Following	1	0:09:52.058000	0:10:00.152000
TrpB5_B5	30_dpr2_gal4_uas_stop_TrpA1_FruFLP6		Following	1	0:09:52.812000	0:10:00.084000
TrpB1_A7	30_dpr3_gal4_uas_stop_Trpa1_FruFLP1		Following	6	0:09:14.705000	0:10:00.079000
TrpB2_R9	30_dpr3_gal4_uas_stop_Trpa1_FruFLP10		Following	2	493.52	600.03
TrpB3_D2	30_dpr3_gal4_uas_stop_Trpa1_FruFLP11		Following	1	0:09:55.778000	0:10:00.112000
TrpB3_B8	30_dpr3_gal4_uas_stop_Trpa1_FruFLP12		Following	3	0:03:23.525000	0:10:00.046000
TrpB3_H5	30_dpr3_gal4_uas_stop_Trpa1_FruFLP13		Following	9	0:05:01.946000	0:10:00.061000
TrpB3_C9	30_dpr3_gal4_uas_stop_Trpa1_FruFLP14		Following	1	0:01:58.683000	0:01:59.051000
TrpB3_O6	30_dpr3_gal4_uas_stop_Trpa1_FruFLP15		Following	4	0:07:23.107000	0:10:00.072000
TrpB1_B6	30_dpr3_gal4_uas_stop_Trpa1_FruFLP2		Following	1	0:09:22.606000	0:09:23.944000
TrpB1_O5	30_dpr3_gal4_uas_stop_Trpa1_FruFLP3		Following	10	0:04:11.258000	0:10:00.147000
TrpB1_L8	30_dpr3_gal4_uas_stop_Trpa1_FruFLP4		Following	1	0:09:48.938000	0:10:00.162000
TrpB1_B2	30_dpr3_gal4_uas_stop_Trpa1_FruFLP5		Following	1	0:09:58.894000	0:10:00.158000
TrpB2_B8	30_dpr3_gal4_uas_stop_Trpa1_FruFLP6		Following	6	553.33	600.06
TrpB2_E9	30_dpr3_gal4_uas_stop_Trpa1_FruFLP7		Following	5	93.57	600.12
TrpB2_H5	30_dpr3_gal4_uas_stop_Trpa1_FruFLP8		Following	1	125.43	126.25
TrpB2_O4	30_dpr3_gal4_uas_stop_Trpa1_FruFLP9		Following	1	552.15	600.14
TrpB7_V1	30_dpr4_gal4_uas_stop_TrpA1_ FruFLP1		Following	14	136.05	600
TrpB7_O7	30_dpr4_gal4_uas_stop_TrpA1_ FruFLP10		Following	15	250.1	600
TrpB7_M1	30_dpr4_gal4_uas_stop_TrpA1_ FruFLP11		Following	20	133.58	600
TrpB7_A2	30_dpr4_gal4_uas_stop_TrpA1_ FruFLP12		Following	17	79.89	600
TrpB7_K9	30_dpr4_gal4_uas_stop_TrpA1_ FruFLP14		Following	22	354.72	600
TrpB7_B4	30_dpr4_gal4_uas_stop_TrpA1_ FruFLP15		Following	4	13.41	600
TrpB7_D6	30_dpr4_gal4_uas_stop_TrpA1_ FruFLP2		Following	19	408.54	600
TrpB7_T1	30_dpr4_gal4_uas_stop_TrpA1_ FruFLP3		Following	7	475.27	600
TrpB7_F7	30_dpr4_gal4_uas_stop_TrpA1_ FruFLP4		Following	26	182.59	600
TrpB7_F6	30_dpr4_gal4_uas_stop_TrpA1_ FruFLP5		Following	1	586.74	600
TrpB7_U5	30_dpr4_gal4_uas_stop_TrpA1_ FruFLP6		Following	8	24.77	600
TrpB7_Q5	30_dpr4_gal4_uas_stop_TrpA1_ FruFLP7		Following	1	53.02	88.45
TrpB7_F4	30_dpr4_gal4_uas_stop_TrpA1_ FruFLP8		Following	9	500.33	600
TrpB7_R3	30_dpr4_gal4_uas_stop_TrpA1_ FruFLP9		Following	6	574.66	600
TrpB1_D4	30_dpr5_gal4_uas_stop_Trpa1_FruFLP1		Following	4	0:09:13.071000	0:10:00.073000
TrpB2_O7	30_dpr5_gal4_uas_stop_Trpa1_FruFLP10		Following	20	171.8	600.17
TrpB3_O9	30_dpr5_gal4_uas_stop_Trpa1_FruFLP11		Following	7	0:01:00.997000	0:10:00.171000
TrpB3_M4	30_dpr5_gal4_uas_stop_Trpa1_FruFLP12		Following	11	0:00:30.161000	0:10:00.065000
TrpB3_S4	30_dpr5_gal4_uas_stop_Trpa1_FruFLP13		Following	18	0:03:35.857000	0:10:00.154000
TrpB3_C2	30_dpr5_gal4_uas_stop_Trpa1_FruFLP14		Following	25	0:03:37.011000	0:10:00.168000
TrpB3_M9	30_dpr5_gal4_uas_stop_Trpa1_FruFLP15		Following	1	0:02:36.991000	0:02:45.599000
TrpB1_R6	30_dpr5_gal4_uas_stop_Trpa1_FruFLP2		Following	11	0:04:53.447000	0:10:00.013000
TrpB1_M2	30_dpr5_gal4_uas_stop_Trpa1_FruFLP3		Following	2	0:09:48.452000	0:10:00.172000
TrpB1_E7	30_dpr5_gal4_uas_stop_Trpa1_FruFLP4		Following	7	0:02:58.287000	0:10:00.110000
TrpB2_R3	30_dpr5_gal4_uas_stop_Trpa1_FruFLP6		Following	19	151.34	600.09
TrpB2_G9	30_dpr5_gal4_uas_stop_Trpa1_FruFLP7		Following	7	17.34	600.05
TrpB2_H9	30_dpr5_gal4_uas_stop_Trpa1_FruFLP8		Following	26	143.02	600.15
TrpB2_D1	30_dpr5_gal4_uas_stop_Trpa1_FruFLP9		Following	22	177.95	600.18
TrpB7_F3	30_dpr6_gal4_uas_stop_TrpA1_ FruFLP1		Following	3	594.47	600
TrpB7_A8	30_dpr6_gal4_uas_stop_TrpA1_ FruFLP10		Following	5	590.17	600
TrpB7_P8	30_dpr6_gal4_uas_stop_TrpA1_ FruFLP11		Following	11	478.75	600
TrpB7_E4	30_dpr6_gal4_uas_stop_TrpA1_ FruFLP12		Following	9	535.2	600
TrpB7_V4	30_dpr6_gal4_uas_stop_TrpA1_ FruFLP13		Following	3	574.56	600
TrpB7_D7	30_dpr6_gal4_uas_stop_TrpA1_ FruFLP14		Following	17	477.6	600
TrpB7_Q3	30_dpr6_gal4_uas_stop_TrpA1_ FruFLP15		Following	21	240.34	600
TrpB7_N9	30_dpr6_gal4_uas_stop_TrpA1_ FruFLP2		Following	1	595.25	600
TrpB7_S3	30_dpr6_gal4_uas_stop_TrpA1_ FruFLP3		Following	7	570.23	600
TrpB7_J7	30_dpr6_gal4_uas_stop_TrpA1_ FruFLP4		Following	17	428.28	600
TrpB7_N7	30_dpr6_gal4_uas_stop_TrpA1_ FruFLP5		Following	1	598.18	600
TrpB7_X3	30_dpr6_gal4_uas_stop_TrpA1_ FruFLP6		Following	21	345.79	600
TrpB7_P6	30_dpr6_gal4_uas_stop_TrpA1_ FruFLP7		Following	11	536.07	600
TrpB7_X5	30_dpr6_gal4_uas_stop_TrpA1_ FruFLP8		Following	15	366.53	600
TrpB7_T2	30_dpr6_gal4_uas_stop_TrpA1_ FruFLP9		Following	1	594.75	600
TrpB6_F2	30_dpr8_gal4_uas_stop_Trpa1_FruFLP10		Following	1	0:02:38.547000	0:02:39.185000
TrpB6_J1	30_dpr8_gal4_uas_stop_Trpa1_FruFLP11		Following	1	0:09:47.936000	0:10:00.074000
TrpB6_A4	30_dpr8_gal4_uas_stop_Trpa1_FruFLP12		Following	1	0:09:58.407000	0:10:00.244000
TrpB6_C4	30_dpr8_gal4_uas_stop_Trpa1_FruFLP13		Following	1	0:09:53.327000	0:10:00.034000
TrpB6_B7	30_dpr8_gal4_uas_stop_Trpa1_FruFLP14		Following	2	0:09:34.882000	0:10:00.075000
TrpB6_B4	30_dpr8_gal4_uas_stop_Trpa1_FruFLP15		Following	1	0:09:55.144000	0:10:00.102000
TrpB6_J3	30_dpr8_gal4_uas_stop_Trpa1_FruFLP4		Following	6	0:08:42.536000	0:10:00.076000
TrpB6_D6	30_dpr8_gal4_uas_stop_Trpa1_FruFLP5		Following	1	0:09:58.396000	0:10:00.015000
TrpB6_F1	30_dpr8_gal4_uas_stop_Trpa1_FruFLP6		Following	4	0:07:47.056000	0:10:00.085000
TrpB6_F3	30_dpr8_gal4_uas_stop_Trpa1_FruFLP7		Following	1	0:09:46.387000	0:10:00.143000
TrpB6_G4	30_dpr8_gal4_uas_stop_Trpa1_FruFLP8		Following	1	0:09:42.315000	0:09:43.740000
TrpB6_B3	30_dpr8_gal4_uas_stop_Trpa1_FruFLP9		Following	2	0:08:17.637000	0:08:38.188000
TrpB5_D8	30_dpr8_uas_stop_TrpA1_FruFLP1		Following	4	0:02:57.366000	0:03:22.456000
TrpB5_B2	30_dpr8_uas_stop_TrpA1_FruFLP2		Following	1	0:09:59.015000	0:10:00.078000
TrpB5_D7	30_dpr8_uas_stop_TrpA1_FruFLP3		Following	1	0:09:58.039000	0:10:00.198000
TrpB5_G3	30_dpr9_gal4_uas_stop_TrpA1_FruFLP1		Following	6	0:07:16.964000	0:10:00.138000
TrpB6_F9	30_dpr9_gal4_uas_stop_Trpa1_FruFLP10		Following	11	0:08:23.597000	0:10:00.043000
TrpB6_H3	30_dpr9_gal4_uas_stop_Trpa1_FruFLP11		Following	2	0:09:51.436000	0:10:00.193000
TrpB6_C6	30_dpr9_gal4_uas_stop_Trpa1_FruFLP12		Following	2	0:09:48.913000	0:10:00.182000
TrpB6_G9	30_dpr9_gal4_uas_stop_Trpa1_FruFLP13		Following	3	0:09:05.248000	0:10:00.081000
TrpB6_H5	30_dpr9_gal4_uas_stop_Trpa1_FruFLP14		Following	4	0:09:16.897000	0:10:00.158000
TrpB6_F7	30_dpr9_gal4_uas_stop_Trpa1_FruFLP15		Following	18	0:07:01.278000	0:10:00.057000
TrpB5_C8	30_dpr9_gal4_uas_stop_TrpA1_FruFLP2		Following	6	0:06:31.965000	0:10:00.042000
TrpB5_E2	30_dpr9_gal4_uas_stop_TrpA1_FruFLP3		Following	21	0:03:23.363000	0:10:00.040000
TrpB5_C9	30_dpr9_gal4_uas_stop_TrpA1_FruFLP4		Following	18	0:06:16.289000	0:10:00.126000
TrpB5_E4	30_dpr9_gal4_uas_stop_TrpA1_FruFLP5		Following	19	0:06:34.268000	0:10:00.050000
TrpB5_A3	30_dpr9_gal4_uas_stop_TrpA1_FruFLP6		Following	9	0:09:24.966000	0:10:00.059000
TrpB5_F9	30_dpr9_gal4_uas_stop_TrpA1_FruFLP7		Following	29	0:05:29.416000	0:10:00.031000
TrpB5_D4	30_dpr9_gal4_uas_stop_TrpA1_FruFLP8		Following	2	0:09:55.131000	0:10:00.104000
TrpB5_G4	30_dpr9_gal4_uas_stop_TrpA1_FruFLP9		Following	26	0:05:48.505000	0:10:00.171000
TrpB7_K4	30_FruFLP_1		Following	4	564.52	600
TrpB7_O2	30_FruFLP_10		Following	1	587.11	600
TrpB7_A6	30_FruFLP_11		Following	2	583.48	600
TrpB7_B1	30_FruFLP_12		Following	2	583.12	600
TrpB7_H5	30_FruFLP_13		Following	1	597.93	600
TrpB7_U4	30_FruFLP_14		Following	1	581.93	600
TrpB7_P1	30_FruFLP_15		Following	3	557.5	600
TrpB7_M2	30_FruFLP_2		Following	1	592.78	600
TrpB7_E7	30_FruFLP_3		Following	1	599.63	600
TrpB7_E6	30_FruFLP_4		Following	1	567.35	600
TrpB7_J3	30_FruFLP_5		Following	3	547.92	600
TrpB7_C9	30_FruFLP_6		Following	1	598.43	600
TrpB7_S6	30_FruFLP_7		Following	1	587.27	600
TrpB7_W1	30_FruFLP_8		Following	1	587.51	600
TrpB7_K1	30_FruFLP_9		Following	1	579.67	600
TrpB4_B9	30_noGAL4_TrpA1_1		Following	1	0:09:55.345000	0:10:00.107000
TrpB4_G3	30_noGAL4_TrpA1_10		Following	1	0:09:34.863000	0:10:00.138000
TrpB4_A3	30_noGAL4_TrpA1_11		Following	3	0:09:09.362000	0:10:00.110000
TrpB4_F2	30_noGAL4_TrpA1_12		Following	1	0:09:58.714000	0:10:00.057000
TrpB4_B4	30_noGAL4_TrpA1_13		Following	1	0:09:41.381000	0:10:00.103000
TrpB4_G4	30_noGAL4_TrpA1_14		Following	1	0:09:45.676000	0:10:00.009000
TrpB4_B1	30_noGAL4_TrpA1_15		Following	4	0:08:50.967000	0:10:00.118000
TrpB4_E2	30_noGAL4_TrpA1_2		Following	2	0:09:38.476000	0:10:00.080000
TrpB4_F8	30_noGAL4_TrpA1_3		Following	1	0:09:14.966000	0:10:00.084000
TrpB4_C8	30_noGAL4_TrpA1_4		Following	3	0:09:30.453000	0:10:00.142000
TrpB4_D7	30_noGAL4_TrpA1_5		Following	5	0:00:11.094000	0:10:00.002000
TrpB4_F5	30_noGAL4_TrpA1_6		Following	14	0:04:15.036000	0:09:53.788000
TrpB4_G6	30_noGAL4_TrpA1_7		Following	1	0:05:19.507000	0:05:23.970000
TrpB4_G2	30_noGAL4_TrpA1_8		Following	1	0:09:53.732000	0:10:00.180000
TrpB4_D1	30_noGAL4_TrpA1_9		Following	3	0:09:26.292000	0:10:00.160000
TrpB7_L4	30_TrpA1_1		Following	1	582.03	600
TrpB7_F5	30_TrpA1_10		Following	1	102.14	600
TrpB7_X4	30_TrpA1_11		Following	8	517.01	600
TrpB7_K8	30_TrpA1_12		Following	1	593.63	600
TrpB7_L2	30_TrpA1_13		Following	1	596.19	600
TrpB7_R5	30_TrpA1_14		Following	2	571.54	600
TrpB7_F1	30_TrpA1_15		Following	1	589.31	600
TrpB7_V9	30_TrpA1_2		Following	1	585.66	600
TrpB7_K5	30_TrpA1_3		Following	1	481.04	483.8
TrpB7_R7	30_TrpA1_4		Following	1	222.05	224.55
TrpB7_U1	30_TrpA1_5		Following	1	588.53	600
TrpB7_N3	30_TrpA1_6		Following	1	598.45	600
TrpB7_G7	30_TrpA1_7		Following	4	573.7	600
TrpB7_S4	30_TrpA1_8		Following	1	595.99	600
TrpB7_C1	30_TrpA1_9		Following	2	546.65	600
TrpB7_C8	20_CSxwCS_1		Successful copulation	1	0	300.28
TrpB7_R9	20_CSxwCS_10		Successful copulation	1	0	399.42
TrpB7_T3	20_CSxwCS_13		Successful copulation	1	0	330.5
TrpB7_V7	20_CSxwCS_15		Successful copulation	1	0	102.46
TrpB7_K7	20_CSxwCS_8		Successful copulation	1	0	377.32
TrpB7_B2	20_CSxwCS_9		Successful copulation	1	0	346.45
TrpB2_M2	20_DIPalpha_gal4_uas_stop_Trpa1_FruFLP10		Successful copulation	1		174.67
TrpB3_N3	20_DIPalpha_gal4_uas_stop_Trpa1_FruFLP11		Successful copulation	1	0	0:01:37.393000
TrpB3_R7	20_DIPalpha_gal4_uas_stop_Trpa1_FruFLP12		Successful copulation	1	0	0:09:21.668000
TrpB3_J1	20_DIPalpha_gal4_uas_stop_Trpa1_FruFLP13		Successful copulation	1	0	0:04:52.433000
TrpB3_O1	20_DIPalpha_gal4_uas_stop_Trpa1_FruFLP14		Successful copulation	1	0	0:02:14.643000
TrpB3_S5	20_DIPalpha_gal4_uas_stop_Trpa1_FruFLP15		Successful copulation	1	0	0:03:57.978000
TrpB1_K3	20_DIPalpha_gal4_uas_stop_Trpa1_FruFLP2		Successful copulation	1	0	0:07:32.279000
TrpB1_K8	20_DIPalpha_gal4_uas_stop_Trpa1_FruFLP3		Successful copulation	1	0	0:09:03.091000
TrpB2_G3	20_DIPalpha_gal4_uas_stop_Trpa1_FruFLP6		Successful copulation	1		195.9
TrpB2_H3	20_DIPalpha_gal4_uas_stop_Trpa1_FruFLP7		Successful copulation	1		207.29
TrpB2_C9	20_DIPalpha_gal4_uas_stop_Trpa1_FruFLP8		Successful copulation	1		426.68
TrpB2_A5	20_DIPbeta_gal4_uas_stop_Trpa1_FruFLP10		Successful copulation	1	0	232.5
TrpB3_H8	20_DIPbeta_gal4_uas_stop_Trpa1_FruFLP11		Successful copulation	1	0	0:01:03.272000
TrpB3_B1	20_DIPbeta_gal4_uas_stop_Trpa1_FruFLP12		Successful copulation	1	0	0:02:31.486000
TrpB3_M8	20_DIPbeta_gal4_uas_stop_Trpa1_FruFLP13		Successful copulation	1	0	0:05:46.335000
TrpB3_K7	20_DIPbeta_gal4_uas_stop_Trpa1_FruFLP14		Successful copulation	1	0	0:02:08.277000
TrpB3_L5	20_DIPbeta_gal4_uas_stop_Trpa1_FruFLP15		Successful copulation	1	0	0:07:15.697000
TrpB1_B1	20_DIPbeta_gal4_uas_stop_Trpa1_FruFLP4		Successful copulation	1	0	0:02:27.045000
TrpB2_H7	20_DIPbeta_gal4_uas_stop_Trpa1_FruFLP6		Successful copulation	1		120.41
TrpB2_B2	20_DIPbeta_gal4_uas_stop_Trpa1_FruFLP7		Successful copulation	1		398.83
TrpB2_L2	20_DIPbeta_gal4_uas_stop_Trpa1_FruFLP8		Successful copulation	1	0	422.88
TrpB2_G5	20_DIPbeta_gal4_uas_stop_Trpa1_FruFLP9		Successful copulation	1		367.55
TrpB1_E8	20_DIPdelta_gal4_uas_stop_Trpa1_FruFLP1		Successful copulation	1	0	0:07:54.478000
TrpB2_S3	20_DIPdelta_gal4_uas_stop_Trpa1_FruFLP10		Successful copulation	1		278.88
TrpB3_K1	20_DIPdelta_gal4_uas_stop_Trpa1_FruFLP11		Successful copulation	1	0	0:05:24.386000
TrpB3_G8	20_DIPdelta_gal4_uas_stop_Trpa1_FruFLP12		Successful copulation	1	0	0:03:18.958000
TrpB3_B2	20_DIPdelta_gal4_uas_stop_Trpa1_FruFLP13		Successful copulation	1	0	0:01:01.904000
TrpB3_A4	20_DIPdelta_gal4_uas_stop_Trpa1_FruFLP14		Successful copulation	1	0	0:02:27.474000
TrpB3_L7	20_DIPdelta_gal4_uas_stop_Trpa1_FruFLP15		Successful copulation	1	0	0:04:58.971000
TrpB1_J9	20_DIPdelta_gal4_uas_stop_Trpa1_FruFLP5		Successful copulation	1	0	0:09:20.331000
TrpB2_C3	20_DIPdelta_gal4_uas_stop_Trpa1_FruFLP6		Successful copulation	1		363.11
TrpB2_C2	20_DIPdelta_gal4_uas_stop_Trpa1_FruFLP8		Successful copulation	1		119.18
TrpB2_K6	20_DIPdelta_gal4_uas_stop_Trpa1_FruFLP9		Successful copulation	1		142.27
TrpB2_O8	20_DIPepsilon_gal4_uas_stop_Trpa1_FruFLP10		Successful copulation	1		0:00:52.946000
TrpB3_K6	20_DIPepsilon_gal4_uas_stop_Trpa1_FruFLP11		Successful copulation	1	0	196.98
TrpB3_J3	20_DIPepsilon_gal4_uas_stop_Trpa1_FruFLP12		Successful copulation	1	0	0:01:34.537000
TrpB3_P8	20_DIPepsilon_gal4_uas_stop_Trpa1_FruFLP13		Successful copulation	1	0	0:03:29.783000
TrpB3_L9	20_DIPepsilon_gal4_uas_stop_Trpa1_FruFLP14		Successful copulation	1	0	0:05:01.660000
TrpB3_C6	20_DIPepsilon_gal4_uas_stop_Trpa1_FruFLP15		Successful copulation	1	0	0:06:50.581000
TrpB1_A4	20_DIPepsilon_gal4_uas_stop_Trpa1_FruFLP2		Successful copulation	1	0	0:04:25.812000
TrpB2_E6	20_DIPepsilon_gal4_uas_stop_Trpa1_FruFLP6		Successful copulation	1		0:01:44.741000
TrpB2_B5	20_DIPepsilon_gal4_uas_stop_Trpa1_FruFLP7		Successful copulation	1		0:02:16.864000
TrpB2_P4	20_DIPepsilon_gal4_uas_stop_Trpa1_FruFLP8		Successful copulation	1		0:02:05.508000
TrpB3_E8	20_DIPeta_gal4_uas_stop_Trpa1_FruFLP12		Successful copulation	1	0	0:06:24.893000
TrpB3_S3	20_DIPeta_gal4_uas_stop_Trpa1_FruFLP13		Successful copulation	1	0	0:01:55.486000
TrpB3_C4	20_DIPeta_gal4_uas_stop_Trpa1_FruFLP14		Successful copulation	1	0	0:02:41.344000
TrpB3_G4	20_DIPeta_gal4_uas_stop_Trpa1_FruFLP15		Successful copulation	1	0	0:01:50.097000
TrpB2_R5	20_DIPeta_gal4_uas_stop_Trpa1_FruFLP6		Successful copulation	1	0	109.96
TrpB2_S4	20_DIPeta_gal4_uas_stop_Trpa1_FruFLP8		Successful copulation	1		398.33
TrpB2_N8	20_DIPgamma_gal4_uas_stop_Trpa1_FruFLP10		Successful copulation	1		600.13
TrpB3_M3	20_DIPgamma_gal4_uas_stop_Trpa1_FruFLP11		Successful copulation	1	0	0:02:42.838000
TrpB3_F9	20_DIPgamma_gal4_uas_stop_Trpa1_FruFLP12		Successful copulation	1	0	0:03:44.073000
TrpB3_P5	20_DIPgamma_gal4_uas_stop_Trpa1_FruFLP13		Successful copulation	1	0	0:05:19.115000
TrpB3_M2	20_DIPgamma_gal4_uas_stop_Trpa1_FruFLP14		Successful copulation	1	0	0:07:16.523000
TrpB3_H3	20_DIPgamma_gal4_uas_stop_Trpa1_FruFLP15		Successful copulation	1	0	0:02:41.530000
TrpB2_S1	20_DIPgamma_gal4_uas_stop_Trpa1_FruFLP6		Successful copulation	1	0	129.1
TrpB2_L9	20_DIPgamma_gal4_uas_stop_Trpa1_FruFLP7		Successful copulation	1		334.76
TrpB2_B4	20_DIPgamma_gal4_uas_stop_Trpa1_FruFLP8		Successful copulation	1		119.55
TrpB2_H6	20_DIPgamma_gal4_uas_stop_Trpa1_FruFLP9		Successful copulation	1		120.91
TrpB5_F1	20_DIPTheta_gal4_uas_stop_Trpa1_FruFLP1		Successful copulation	1	0	0:07:08.784000
TrpB5_E8	20_DIPTheta_gal4_uas_stop_Trpa1_FruFLP10		Successful copulation	1	0	0:03:31.044000
TrpB5_G6	20_DIPTheta_gal4_uas_stop_Trpa1_FruFLP11		Successful copulation	1	0	0:01:43.151000
TrpB5_F4	20_DIPTheta_gal4_uas_stop_Trpa1_FruFLP12		Successful copulation	1	0	0:05:05.949000
TrpB5_H4	20_DIPTheta_gal4_uas_stop_Trpa1_FruFLP2		Successful copulation	1	0	0:02:48.315000
TrpB5_A7	20_DIPTheta_gal4_uas_stop_Trpa1_FruFLP4		Successful copulation	1	0	0:04:06.779000
TrpB5_D2	20_DIPTheta_gal4_uas_stop_Trpa1_FruFLP5		Successful copulation	1	0	0:09:14.491000
TrpB5_C6	20_DIPTheta_gal4_uas_stop_Trpa1_FruFLP6		Successful copulation	1	0	0:08:48.689000
TrpB5_A5	20_DIPTheta_gal4_uas_stop_Trpa1_FruFLP7		Successful copulation	1	0	0:05:15.687000
TrpB2_L3	20_DIPzeta_gal4_uas_stop_Trpa1_FruFLP10		Successful copulation	1		156.74
TrpB3_P3	20_DIPzeta_gal4_uas_stop_Trpa1_FruFLP11		Successful copulation	1	0	0:07:25.724000
TrpB3_O5	20_DIPzeta_gal4_uas_stop_Trpa1_FruFLP12		Successful copulation	1	0	0:01:16.859000
TrpB3_N5	20_DIPzeta_gal4_uas_stop_Trpa1_FruFLP13		Successful copulation	1	0	0:01:53.743000
TrpB3_R3	20_DIPzeta_gal4_uas_stop_Trpa1_FruFLP14		Successful copulation	1	0	0:02:26.676000
TrpB3_G2	20_DIPzeta_gal4_uas_stop_Trpa1_FruFLP15		Successful copulation	1	0	0:05:16.895000
TrpB2_A9	20_DIPzeta_gal4_uas_stop_Trpa1_FruFLP6		Successful copulation	1		82.33
TrpB2_F8	20_DIPzeta_gal4_uas_stop_Trpa1_FruFLP7		Successful copulation	1		282.69
TrpB2_F9	20_DIPzeta_gal4_uas_stop_Trpa1_FruFLP8		Successful copulation	1		275.74
TrpB2_K1	20_DIPzeta_gal4_uas_stop_Trpa1_FruFLP9		Successful copulation	1		65.64
TrpB3_K2	20_dpr1_gal4_uas_stop_Trpa1_FruFLP11		Successful copulation	1	0	0:01:22.804000
TrpB3_K9	20_dpr1_gal4_uas_stop_Trpa1_FruFLP13		Successful copulation	1	0	0:02:16.539000
TrpB2_J6	20_dpr1_gal4_uas_stop_Trpa1_FruFLP7		Successful copulation	1		127.15
TrpB2_S5	20_dpr1_gal4_uas_stop_Trpa1_FruFLP9		Successful copulation	1		78.36
TrpB2_J9	20_dpr10_gal4_uas_stop_Trpa1_FruFLP10		Successful copulation	1		39.87
TrpB3_E7	20_dpr10_gal4_uas_stop_Trpa1_FruFLP11		Successful copulation	1	0	0:00:46.908000
TrpB3_R1	20_dpr10_gal4_uas_stop_Trpa1_FruFLP13		Successful copulation	1	0	0:01:51.386000
TrpB3_J7	20_dpr10_gal4_uas_stop_Trpa1_FruFLP15		Successful copulation	1	0	0:01:55.997000
TrpB2_D7	20_dpr10_gal4_uas_stop_Trpa1_FruFLP7		Successful copulation	1		494.1
TrpB2_E3	20_dpr10_gal4_uas_stop_Trpa1_FruFLP8		Successful copulation	1		244.3
TrpB2_D6	20_dpr10_gal4_uas_stop_Trpa1_FruFLP9		Successful copulation	1		188.83
TrpB2_C6	20_dpr11_gal4_uas_stop_Trpa1_FruFLP10		Successful copulation	1		154.47
TrpB3_C7	20_dpr11_gal4_uas_stop_Trpa1_FruFLP14		Successful copulation	1	0	0:03:56.161000
TrpB2_A1	20_dpr11_gal4_uas_stop_Trpa1_FruFLP6		Successful copulation	1		302.94
TrpB2_D5	20_dpr11_gal4_uas_stop_Trpa1_FruFLP7		Successful copulation	1		332.79
TrpB2_R2	20_dpr11_gal4_uas_stop_Trpa1_FruFLP8		Successful copulation	1		416.04
TrpB2_K3	20_dpr11_gal4_uas_stop_Trpa1_FruFLP9		Successful copulation	1		340.52
TrpB3_D4	20_dpr12_gal4_uas_stop_Trpa1_FruFLP12		Successful copulation	1	0	0:01:43.811000
TrpB3_A2	20_dpr12_gal4_uas_stop_Trpa1_FruFLP14		Successful copulation	1	0	0:08:10.492000
TrpB2_K5	20_dpr12_gal4_uas_stop_Trpa1_FruFLP9		Successful copulation	1		385.79
TrpB7_D2	20_dpr14_gal4_uas_stop_Trpa1_FruFLP2		Successful copulation	1	0	332.2
TrpB7_Q9	20_dpr14_gal4_uas_stop_Trpa1_FruFLP5		Successful copulation	1	0	237.73
TrpB7_E3	20_dpr14_gal4_uas_stop_Trpa1_FruFLP6		Successful copulation	1	0	101.36
TrpB7_G8	20_dpr14_gal4_uas_stop_Trpa1_FruFLP8		Successful copulation	1	0	515.58
TrpB4_F9	20_Dpr15_gal4_uas_stop_Trpa1_FruFLP1		Successful copulation	1	0	0:02:15.488000
TrpB6_C3	20_dpr15_gal4_uas_stop_Trpa1_FruFLP11		Successful copulation	1	0	0:06:16.020000
TrpB6_H8	20_dpr15_gal4_uas_stop_Trpa1_FruFLP12		Successful copulation	1	0	0:09:25.005000
TrpB6_J4	20_dpr15_gal4_uas_stop_Trpa1_FruFLP13		Successful copulation	1	0	0:00:30.062000
TrpB6_E6	20_dpr15_gal4_uas_stop_Trpa1_FruFLP14		Successful copulation	1	0	0:02:03.991000
TrpB6_D2	20_dpr15_gal4_uas_stop_Trpa1_FruFLP15		Successful copulation	1	0	0:07:59.321000
TrpB6_F6	20_dpr15_gal4_uas_stop_Trpa1_FruFLP16		Successful copulation	1	0	0:04:12.198000
TrpB4_C2	20_Dpr15_gal4_uas_stop_Trpa1_FruFLP2		Successful copulation	1	0	0:01:51.802000
TrpB4_F1	20_Dpr15_gal4_uas_stop_Trpa1_FruFLP3		Successful copulation	1	0	0:01:06.540000
TrpB4_A9	20_Dpr15_gal4_uas_stop_Trpa1_FruFLP5		Successful copulation	1	0	0:03:38.527000
TrpB5_G8	20_dpr15_gal4_uas_stop_Trpa1_FruFLP6		Successful copulation	1	0	0:03:43.960000
TrpB6_D7	20_dpr15_gal4_uas_stop_Trpa1_FruFLP7		Successful copulation	1	0	0:05:48.506000
TrpB6_C2	20_dpr15_gal4_uas_stop_Trpa1_FruFLP9		Successful copulation	1	0	0:06:35.971000
TrpB2_P5	20_dpr16_gal4_uas_stop_Trpa1_FruFLP10		Successful copulation	1		306.03
TrpB3_E1	20_dpr16_gal4_uas_stop_Trpa1_FruFLP12		Successful copulation	1	0	0:08:09.062000
TrpB3_H7	20_dpr16_gal4_uas_stop_Trpa1_FruFLP13		Successful copulation	1	0	0:04:34.410000
TrpB3_A7	20_dpr16_gal4_uas_stop_Trpa1_FruFLP15		Successful copulation	1	0	0:01:01.125000
TrpB2_K9	20_dpr16_gal4_uas_stop_Trpa1_FruFLP6		Successful copulation	1		162.57
TrpB2_R8	20_dpr16_gal4_uas_stop_Trpa1_FruFLP8		Successful copulation	1		525.41
TrpB2_M4	20_dpr16_gal4_uas_stop_Trpa1_FruFLP9		Successful copulation	1		291.61
TrpB4_B3	20_Dpr17_gal4_uas_stop_Trpa1_FruFLP1		Successful copulation	1	0	0:02:19.254000
TrpB4_C5	20_Dpr17_gal4_uas_stop_Trpa1_FruFLP10		Successful copulation	1	0	0:02:00.976000
TrpB5_D9	20_dpr17_gal4_uas_stop_Trpa1_FruFLP11		Successful copulation	1	0	0:06:33.740000
TrpB5_C5	20_dpr17_gal4_uas_stop_Trpa1_FruFLP12		Successful copulation	1	0	0:01:46.005000
TrpB5_C1	20_dpr17_gal4_uas_stop_Trpa1_FruFLP13		Successful copulation	1	0	0:03:27.796000
TrpB5_E7	20_dpr17_gal4_uas_stop_Trpa1_FruFLP14		Successful copulation	1	0	0:03:18.834000
TrpB5_E3	20_dpr17_gal4_uas_stop_Trpa1_FruFLP15		Successful copulation	1	0	0:05:13.154000
TrpB4_E9	20_Dpr17_gal4_uas_stop_Trpa1_FruFLP3		Successful copulation	1	0	0:04:28.561000
TrpB4_F6	20_Dpr17_gal4_uas_stop_Trpa1_FruFLP4		Successful copulation	1	0	0:09:13.355000
TrpB4_E4	20_Dpr17_gal4_uas_stop_Trpa1_FruFLP5		Successful copulation	1	0	0:02:29.653000
TrpB4_F7	20_Dpr17_gal4_uas_stop_Trpa1_FruFLP7		Successful copulation	1	0	0:03:55.908000
TrpB4_B8	20_Dpr17_gal4_uas_stop_Trpa1_FruFLP9		Successful copulation	1	0	0:01:12.346000
TrpB7_J8	20_dpr18_gal4_uas_stop_Trpa1_FruFLP10		Successful copulation	1	0	318.13
TrpB7_P4	20_dpr18_gal4_uas_stop_Trpa1_FruFLP13		Successful copulation	1	0	76.53
TrpB7_A3	20_dpr18_gal4_uas_stop_Trpa1_FruFLP2		Successful copulation	1	0	260.52
TrpB7_S7	20_dpr18_gal4_uas_stop_Trpa1_FruFLP5		Successful copulation	1	0	140.26
TrpB7_D5	20_dpr18_gal4_uas_stop_Trpa1_FruFLP6		Successful copulation	1	0	402.6
TrpB7_T5	20_dpr18_gal4_uas_stop_Trpa1_FruFLP7		Successful copulation	1	0	239.48
TrpB7_X9	20_dpr18_gal4_uas_stop_Trpa1_FruFLP8		Successful copulation	1	0	435.67
[truncated: 936 more rows]

## Sheet: 3. TrpA1 male alone
Noldus file name	Unblind	Coding notes	Behaviors	Total number	Total duration	Duration
TrpB5_F4	20_CS1_male alone		Abdominal bending	0	0	600
TrpB5_F2	20_CS10_male alone		Abdominal bending	0	0	600
TrpB5_F3	20_CS2_male alone		Abdominal bending	0	0	600
TrpB5_B8	20_CS3_male alone		Abdominal bending	0	0	600
TrpB5_L4	20_CS4_male alone		Abdominal bending	0	0	600
TrpB5_H9	20_CS5_male alone		Abdominal bending	0	0	600
TrpB5_G4	20_CS6_male alone	proboscis ext. ~280	Abdominal bending	0	0	600
TrpB5_M9	20_CS7_male alone		Abdominal bending	0	0	600
TrpB5_N2	20_CS8_male alone		Abdominal bending	0	0	600
TrpB5_K2	20_CS9_male alone	proboscis ext. ex~145, 165, 210 & many more	Abdominal bending	0	0	600
TrpB2_L7	20_DIPalpha_ uas_stop_TrpA1_ FruFLP1_male alone		Abdominal bending	0	0	600
TrpB2_J8	20_DIPalpha_ uas_stop_TrpA1_ FruFLP10_male alone		Abdominal bending	0	0	600
TrpB2_C1	20_DIPalpha_ uas_stop_TrpA1_ FruFLP2_male alone		Abdominal bending	0	0	600
TrpB2_D2	20_DIPalpha_ uas_stop_TrpA1_ FruFLP3_male alone		Abdominal bending	0	0	600
TrpB2_F8	20_DIPalpha_ uas_stop_TrpA1_ FruFLP4_male alone		Abdominal bending	0	0	600
TrpB2_J1	20_DIPalpha_ uas_stop_TrpA1_ FruFLP5_male alone		Abdominal bending	0	0	600
TrpB2_B2	20_DIPalpha_ uas_stop_TrpA1_ FruFLP6_male alone		Abdominal bending	0	0	600
TrpB2_G7	20_DIPalpha_ uas_stop_TrpA1_ FruFLP7_male alone		Abdominal bending	0	0	600
TrpB2_D3	20_DIPalpha_ uas_stop_TrpA1_ FruFLP8_male alone		Abdominal bending	0	0	600
TrpB2_A6	20_DIPalpha_ uas_stop_TrpA1_ FruFLP9_male alone		Abdominal bending	0	0	600
TrpB1_D6	20_DIPbeta_gal4, uas_stop_Trpa1, FruFLP1_male alone		Abdominal bending	0	0	600
TrpB1_J9	20_DIPbeta_gal4, uas_stop_Trpa1, FruFLP10_male alone		Abdominal bending	0	0	600
TrpB1_L6	20_DIPbeta_gal4, uas_stop_Trpa1, FruFLP2_male alone		Abdominal bending	0	0	600
TrpB1_K8	20_DIPbeta_gal4, uas_stop_Trpa1, FruFLP3_male alone		Abdominal bending	0	0	600
TrpB1_A7	20_DIPbeta_gal4, uas_stop_Trpa1, FruFLP4_male alone		Abdominal bending	0	0	600
TrpB1_E3	20_DIPbeta_gal4, uas_stop_Trpa1, FruFLP5_male alone		Abdominal bending	0	0	600
TrpB1_F9	20_DIPbeta_gal4, uas_stop_Trpa1, FruFLP6_male alone		Abdominal bending	0	0	600
TrpB1_E2	20_DIPbeta_gal4, uas_stop_Trpa1, FruFLP7_male alone		Abdominal bending	0	0	600
TrpB1_G6	20_DIPbeta_gal4, uas_stop_Trpa1, FruFLP8_male alone		Abdominal bending	0	0	600
TrpB1_A2	20_DIPbeta_gal4, uas_stop_Trpa1, FruFLP9_male alone		Abdominal bending	0	0	600
TrpB3_D2	20_DIPdelta_ uas_stop_TrpA1_ FruFLP1_male alone		Abdominal bending	0	0	600
TrpB3_C5	20_DIPdelta_ uas_stop_TrpA1_ FruFLP10_male alone	Loss of righting--starts early	Abdominal bending	0	0	600
TrpB3_H2	20_DIPdelta_ uas_stop_TrpA1_ FruFLP2_male alone		Abdominal bending	0	0	600
TrpB3_K7	20_DIPdelta_ uas_stop_TrpA1_ FruFLP3_male alone		Abdominal bending	0	0	600
TrpB3_E3	20_DIPdelta_ uas_stop_TrpA1_ FruFLP4_male alone		Abdominal bending	0	0	600
TrpB3_E1	20_DIPdelta_ uas_stop_TrpA1_ FruFLP5_male alone	head rubbing-abdomen bobbing?	Abdominal bending	0	0	600
TrpB3_C9	20_DIPdelta_ uas_stop_TrpA1_ FruFLP6_male alone	Lots of head rubbing	Abdominal bending	0	0	600
TrpB3_A4	20_DIPdelta_ uas_stop_TrpA1_ FruFLP7_male alone		Abdominal bending	0	0	600
TrpB3_M5	20_DIPdelta_ uas_stop_TrpA1_ FruFLP8_male alone		Abdominal bending	0	0	600
TrpB3_H5	20_DIPdelta_ uas_stop_TrpA1_ FruFLP9_male alone		Abdominal bending	0	0	600
TrpB2_H9	20_DIPepsilon_ uas_stop_TrpA1_ FruFLP1_male alone	Abdomen bobbing? Hard to tell. More in the beginning	Abdominal bending	0	0	600
TrpB2_M5	20_DIPepsilon_ uas_stop_TrpA1_ FruFLP10_male alone		Abdominal bending	0	0	600
TrpB2_E6	20_DIPepsilon_ uas_stop_TrpA1_ FruFLP2_male alone		Abdominal bending	0	0	600
TrpB2_A5	20_DIPepsilon_ uas_stop_TrpA1_ FruFLP3_male alone		Abdominal bending	0	0	600
TrpB2_G3	20_DIPepsilon_ uas_stop_TrpA1_ FruFLP4_male alone		Abdominal bending	0	0	600
TrpB2_L8	20_DIPepsilon_ uas_stop_TrpA1_ FruFLP5_male alone		Abdominal bending	0	0	600
TrpB2_D8	20_DIPepsilon_ uas_stop_TrpA1_ FruFLP6_male alone	Abdomen bobbing ~400	Abdominal bending	1	4.79887	600
TrpB2_C6	20_DIPepsilon_ uas_stop_TrpA1_ FruFLP7_male alone		Abdominal bending	1	10.654	600
TrpB2_A7	20_DIPepsilon_ uas_stop_TrpA1_ FruFLP8_male alone		Abdominal bending	0	0	600
TrpB2_B6	20_DIPepsilon_ uas_stop_TrpA1_ FruFLP9_male alone		Abdominal bending	0	0	600
TrpB2_D4	20_DIPeta_ uas_stop_TrpA1_ FruFLP1_male alone		Abdominal bending	1	1.284	600
TrpB2_K5	20_DIPeta_ uas_stop_TrpA1_ FruFLP10_male alone		Abdominal bending	0	0	600
TrpB2_E1	20_DIPeta_ uas_stop_TrpA1_ FruFLP2_male alone		Abdominal bending	0	0	600
TrpB2_F4	20_DIPeta_ uas_stop_TrpA1_ FruFLP3_male alone		Abdominal bending	0	0	600
TrpB2_B3	20_DIPeta_ uas_stop_TrpA1_ FruFLP4_male alone		Abdominal bending	0	0	600
TrpB2_D5	20_DIPeta_ uas_stop_TrpA1_ FruFLP5_male alone		Abdominal bending	0	0	600
TrpB2_K9	20_DIPeta_ uas_stop_TrpA1_ FruFLP6_male alone		Abdominal bending	0	0	600
TrpB2_H8	20_DIPeta_ uas_stop_TrpA1_ FruFLP7_male alone		Abdominal bending	0	0	600
TrpB2_F6	20_DIPeta_ uas_stop_TrpA1_ FruFLP8_male alone		Abdominal bending	0	0	600
TrpB2_H3	20_DIPeta_ uas_stop_TrpA1_ FruFLP9_male alone		Abdominal bending	0	0	600
TrpB2_J7	20_DIPgamma_ uas_stop_TrpA1_ FruFLP1_male alone		Abdominal bending	0	0	600
TrpB2_E3	20_DIPgamma_ uas_stop_TrpA1_ FruFLP10_male alone		Abdominal bending	0	0	600
TrpB2_B5	20_DIPgamma_ uas_stop_TrpA1_ FruFLP2_male alone		Abdominal bending	0	0	600
TrpB2_C5	20_DIPgamma_ uas_stop_TrpA1_ FruFLP3_male alone		Abdominal bending	0	0	600
TrpB2_K7	20_DIPgamma_ uas_stop_TrpA1_ FruFLP4_male alone		Abdominal bending	0	0	600
TrpB2_H6	20_DIPgamma_ uas_stop_TrpA1_ FruFLP5_male alone		Abdominal bending	0	0	595.597
TrpB2_A4	20_DIPgamma_ uas_stop_TrpA1_ FruFLP6_male alone		Abdominal bending	0	0	600
TrpB2_F2	20_DIPgamma_ uas_stop_TrpA1_ FruFLP7_male alone		Abdominal bending	0	0	600
TrpB2_C7	20_DIPgamma_ uas_stop_TrpA1_ FruFLP8_male alone		Abdominal bending	0	0	600
TrpB2_L9	20_DIPgamma_ uas_stop_TrpA1_ FruFLP9_male alone		Abdominal bending	0	0	600
TrpB3_L6	20_DIPTheta_ uas_stop_TrpA1_ FruFLP1_male alone		Abdominal bending	0	0	599.663
TrpB3_G3	20_DIPTheta_ uas_stop_TrpA1_ FruFLP10_male alone	Jerky movements	Abdominal bending	0	0	600
TrpB3_K8	20_DIPTheta_ uas_stop_TrpA1_ FruFLP2_male alone		Abdominal bending	0	0	600
TrpB3_G1	20_DIPTheta_ uas_stop_TrpA1_ FruFLP3_male alone	beginning spins in circles	Abdominal bending	0	0	600
TrpB3_E8	20_DIPTheta_ uas_stop_TrpA1_ FruFLP4_male alone		Abdominal bending	0	0	600
TrpB3_F2	20_DIPTheta_ uas_stop_TrpA1_ FruFLP5_male alone		Abdominal bending	0	0	599.463
TrpB3_M6	20_DIPTheta_ uas_stop_TrpA1_ FruFLP6_male alone		Abdominal bending	0	0	600
TrpB3_B5	20_DIPTheta_ uas_stop_TrpA1_ FruFLP7_male alone	Can't tell if wings stuck out or dbl wing ext. Clear proboscis extension happens ~507 but also before	Abdominal bending	0	0	600
TrpB3_F9	20_DIPTheta_ uas_stop_TrpA1_ FruFLP8_male alone		Abdominal bending	0	0	600
TrpB3_F4	20_DIPTheta_ uas_stop_TrpA1_ FruFLP9_male alone		Abdominal bending	0	0	600
TrpB3_M3	20_DIPzeta_ uas_stop_TrpA1_ FruFLP1_male alone		Abdominal bending	0	0	600
TrpB3_E5	20_DIPzeta_ uas_stop_TrpA1_ FruFLP10_male alone		Abdominal bending	0	0	600
TrpB3_B4	20_DIPzeta_ uas_stop_TrpA1_ FruFLP2_male alone		Abdominal bending	0	0	600
TrpB3_J5	20_DIPzeta_ uas_stop_TrpA1_ FruFLP3_male alone		Abdominal bending	0	0	600
TrpB3_A1	20_DIPzeta_ uas_stop_TrpA1_ FruFLP4_male alone	Abdomen bobbing starting ~80	Abdominal bending	0	0	600
TrpB3_E2	20_DIPzeta_ uas_stop_TrpA1_ FruFLP5_male alone		Abdominal bending	0	0	600
TrpB3_G8	20_DIPzeta_ uas_stop_TrpA1_ FruFLP6_male alone		Abdominal bending	0	0	600
TrpB3_D7	20_DIPzeta_ uas_stop_TrpA1_ FruFLP7_male alone		Abdominal bending	0	0	600
TrpB3_J6	20_DIPzeta_ uas_stop_TrpA1_ FruFLP8_male alone		Abdominal bending	0	0	600
TrpB3_A3	20_DIPzeta_ uas_stop_TrpA1_ FruFLP9_male alone	Short* bouts of loss of righting. Ex. ~185	Abdominal bending	0	0	600
TrpB4_G9	20_dpr1_ uas_stop_TrpA1_ FruFLP1_male alone		Abdominal bending	0	0	600
TrpB4_C3	20_dpr1_ uas_stop_TrpA1_ FruFLP10_male alone		Abdominal bending	0	0	600
TrpB4_F1	20_dpr1_ uas_stop_TrpA1_ FruFLP2_male alone	abdomen bobbing ~400	Abdominal bending	0	0	600
TrpB4_K2	20_dpr1_ uas_stop_TrpA1_ FruFLP3_male alone		Abdominal bending	0	0	600
TrpB4_J7	20_dpr1_ uas_stop_TrpA1_ FruFLP4_male alone		Abdominal bending	0	0	600
TrpB4_C4	20_dpr1_ uas_stop_TrpA1_ FruFLP5_male alone	Lots of head rubbing	Abdominal bending	0	0	600
TrpB4_C7	20_dpr1_ uas_stop_TrpA1_ FruFLP6_male alone	lots of head and probocsis rubbing	Abdominal bending	0	0	600
TrpB4_B7	20_dpr1_ uas_stop_TrpA1_ FruFLP7_male alone		Abdominal bending	0	0	600
TrpB4_E5	20_dpr1_ uas_stop_TrpA1_ FruFLP8_male alone		Abdominal bending	0	0	600
TrpB4_H2	20_dpr1_ uas_stop_TrpA1_ FruFLP9_male alone		Abdominal bending	0	0	600
TrpB1_C2	20_dpr10_gal4, uas_stop_Trpa1, FruFLP_male alone 1		Abdominal bending	0	0	600
TrpB1_A8	20_dpr10_gal4, uas_stop_Trpa1, FruFLP_male alone 10		Abdominal bending	0	0	600
TrpB1_E1	20_dpr10_gal4, uas_stop_Trpa1, FruFLP_male alone 2		Abdominal bending	0	0	600
TrpB1_J4	20_dpr10_gal4, uas_stop_Trpa1, FruFLP_male alone 3		Abdominal bending	0	0	600
TrpB1_F1	20_dpr10_gal4, uas_stop_Trpa1, FruFLP_male alone 4		Abdominal bending	0	0	600
TrpB1_D3	20_dpr10_gal4, uas_stop_Trpa1, FruFLP_male alone 5		Abdominal bending	0	0	600
TrpB1_H5	20_dpr10_gal4, uas_stop_Trpa1, FruFLP_male alone 6		Abdominal bending	0	0	600
TrpB1_D2	20_dpr10_gal4, uas_stop_Trpa1, FruFLP_male alone 7		Abdominal bending	0	0	600
TrpB1_C1	20_dpr10_gal4, uas_stop_Trpa1, FruFLP_male alone 8		Abdominal bending	0	0	600
TrpB1_E5	20_dpr10_gal4, uas_stop_Trpa1, FruFLP_male alone 9		Abdominal bending	0	0	600
TrpB1_M2	20_dpr11_gal4, uas_stop_Trpa1, FruFL6P_male alone		Abdominal bending	0	0	600
TrpB1_C3	20_dpr11_gal4, uas_stop_Trpa1, FruFLP1_male alone		Abdominal bending	0	0	600
TrpB1_H4	20_dpr11_gal4, uas_stop_Trpa1, FruFLP10_male alone		Abdominal bending	0	0	600
TrpB1_G3	20_dpr11_gal4, uas_stop_Trpa1, FruFLP2_male alone	Falls down a lot. Short bursts of loss of righting	Abdominal bending	0	0	600
TrpB1_A3	20_dpr11_gal4, uas_stop_Trpa1, FruFLP3_male alone		Abdominal bending	0	0	600
TrpB1_A9	20_dpr11_gal4, uas_stop_Trpa1, FruFLP4_male alone		Abdominal bending	0	0	600
TrpB1_L7	20_dpr11_gal4, uas_stop_Trpa1, FruFLP5_male alone		Abdominal bending	0	0	600
TrpB1_H2	20_dpr11_gal4, uas_stop_Trpa1, FruFLP7_male alone		Abdominal bending	0	0	600
TrpB1_D8	20_dpr11_gal4, uas_stop_Trpa1, FruFLP8_male alone		Abdominal bending	0	0	600
TrpB1_L4	20_dpr11_gal4, uas_stop_Trpa1, FruFLP9_male alone		Abdominal bending	0	0	600
TrpB3_G4	20_dpr12_ uas_stop_TrpA1_ FruFLP1_male alone		Abdominal bending	0	0	600
TrpB4_L3	20_dpr12_ uas_stop_TrpA1_ FruFLP10_male alone		Abdominal bending	0	0	600
TrpB3_J4	20_dpr12_ uas_stop_TrpA1_ FruFLP2_male alone		Abdominal bending	0	0	600
TrpB3_C4	20_dpr12_ uas_stop_TrpA1_ FruFLP3_male alone		Abdominal bending	0	0	600
TrpB3_C2	20_dpr12_ uas_stop_TrpA1_ FruFLP4_male alone		Abdominal bending	0	0	600
TrpB3_J7	20_dpr12_ uas_stop_TrpA1_ FruFLP5_male alone		Abdominal bending	0	0	600
TrpB4_C6	20_dpr12_ uas_stop_TrpA1_ FruFLP6_male alone		Abdominal bending	0	0	600
TrpB4_A3	20_dpr12_ uas_stop_TrpA1_ FruFLP7_male alone		Abdominal bending	0	0	600
TrpB4_F7	20_dpr12_ uas_stop_TrpA1_ FruFLP8_male alone		Abdominal bending	0	0	600
TrpB4_G1	20_dpr12_ uas_stop_TrpA1_ FruFLP9_male alone		Abdominal bending	0	0	600
TrpB5_H5	20_dpr14_ uas_stop_TrpA1_ FruFLP1_male alone		Abdominal bending	0	0	600
TrpB5_G7	20_dpr14_ uas_stop_TrpA1_ FruFLP10_male alone		Abdominal bending	0	0	600
TrpB5_L6	20_dpr14_ uas_stop_TrpA1_ FruFLP2_male alone		Abdominal bending	0	0	600
TrpB5_E7	20_dpr14_ uas_stop_TrpA1_ FruFLP3_male alone		Abdominal bending	0	0	600
TrpB5_B7	20_dpr14_ uas_stop_TrpA1_ FruFLP4_male alone		Abdominal bending	0	0	600
TrpB5_L9	20_dpr14_ uas_stop_TrpA1_ FruFLP5_male alone		Abdominal bending	0	0	600
TrpB5_C3	20_dpr14_ uas_stop_TrpA1_ FruFLP6_male alone		Abdominal bending	0	0	600
TrpB5_F6	20_dpr14_ uas_stop_TrpA1_ FruFLP7_male alone		Abdominal bending	0	0	600
TrpB5_L2	20_dpr14_ uas_stop_TrpA1_ FruFLP8_male alone		Abdominal bending	0	0	600
TrpB5_N7	20_dpr14_ uas_stop_TrpA1_ FruFLP9_male alone		Abdominal bending	0	0	600
TrpB3_D8	20_dpr15_ uas_stop_TrpA1_ FruFLP1_male alone	abdomen bobbing	Abdominal bending	0	0	600
TrpB3_C8	20_dpr15_ uas_stop_TrpA1_ FruFLP10_male alone	Lots of head rubbing	Abdominal bending	0	0	600
TrpB3_H8	20_dpr15_ uas_stop_TrpA1_ FruFLP2_male alone		Abdominal bending	0	0	600
TrpB3_B1	20_dpr15_ uas_stop_TrpA1_ FruFLP3_male alone		Abdominal bending	0	0	600
TrpB3_A8	20_dpr15_ uas_stop_TrpA1_ FruFLP4_male alone		Abdominal bending	0	0	600
TrpB3_J3	20_dpr15_ uas_stop_TrpA1_ FruFLP5_male alone		Abdominal bending	0	0	600
TrpB3_H6	20_dpr15_ uas_stop_TrpA1_ FruFLP6_male alone		Abdominal bending	0	0	600
TrpB3_L4	20_dpr15_ uas_stop_TrpA1_ FruFLP7_male alone		Abdominal bending	0	0	600
TrpB3_B7	20_dpr15_ uas_stop_TrpA1_ FruFLP8_male alone		Abdominal bending	0	0	600
TrpB3_F5	20_dpr15_ uas_stop_TrpA1_ FruFLP9_male alone		Abdominal bending	0	0	600
TrpB3_C6	20_dpr16_ uas_stop_TrpA1_ FruFLP1_male alone	abdomen bobbing ~250	Abdominal bending	0	0	600
TrpB3_F8	20_dpr16_ uas_stop_TrpA1_ FruFLP10_male alone	abdomen bobbing starting ~200	Abdominal bending	0	0	600
TrpB3_M4	20_dpr16_ uas_stop_TrpA1_ FruFLP2_male alone		Abdominal bending	0	0	600
TrpB3_H3	20_dpr16_ uas_stop_TrpA1_ FruFLP3_male alone		Abdominal bending	0	0	600
TrpB3_K3	20_dpr16_ uas_stop_TrpA1_ FruFLP4_male alone	Lots of head rubbing	Abdominal bending	0	0	600
TrpB3_H7	20_dpr16_ uas_stop_TrpA1_ FruFLP5_male alone		Abdominal bending	0	0	600
TrpB3_B9	20_dpr16_ uas_stop_TrpA1_ FruFLP6_male alone	Proboscis ext. Rubs head constantly	Abdominal bending	0	0	600
TrpB3_K9	20_dpr16_ uas_stop_TrpA1_ FruFLP7_male alone		Abdominal bending	0	0	600
TrpB3_D4	20_dpr16_ uas_stop_TrpA1_ FruFLP8_male alone		Abdominal bending	0	0	600
TrpB3_L9	20_dpr16_ uas_stop_TrpA1_ FruFLP9_male alone		Abdominal bending	0	0	600
TrpB1_H3	20_dpr17_gal4, uas_stop_Trpa1, FruFLP1_male alone		Abdominal bending	0	0	600
TrpB1_K2	20_dpr17_gal4, uas_stop_Trpa1, FruFLP10_male alone		Abdominal bending	0	0	600
TrpB1_L9	20_dpr17_gal4, uas_stop_Trpa1, FruFLP2_male alone	Backwards walking. Abdomen bobbing.	Abdominal bending	0	0	600
TrpB1_J7	20_dpr17_gal4, uas_stop_Trpa1, FruFLP3_male alone		Abdominal bending	0	0	600
TrpB1_D9	20_dpr17_gal4, uas_stop_Trpa1, FruFLP4_male alone		Abdominal bending	1	3.411	600
TrpB1_B6	20_dpr17_gal4, uas_stop_Trpa1, FruFLP5_male alone		Abdominal bending	0	0	600
TrpB1_J1	20_dpr17_gal4, uas_stop_Trpa1, FruFLP6_male alone		Abdominal bending	0	0	600
TrpB1_C4	20_dpr17_gal4, uas_stop_Trpa1, FruFLP7_male alone		Abdominal bending	0	0	600
TrpB1_A6	20_dpr17_gal4, uas_stop_Trpa1, FruFLP8_male alone		Abdominal bending	0	0	600
TrpB1_K5	20_dpr17_gal4, uas_stop_Trpa1, FruFLP9_male alone		Abdominal bending	0	0	600
TrpB4_E8	20_dpr18_ uas_stop_TrpA1_ FruFLP1_male alone	lots of proboscis/head rubbing. Probsocis ext.	Abdominal bending	0	0	600
TrpB4_G8	20_dpr18_ uas_stop_TrpA1_ FruFLP10_male alone		Abdominal bending	0	0	600
TrpB4_K7	20_dpr18_ uas_stop_TrpA1_ FruFLP2_male alone		Abdominal bending	0	0	600
TrpB4_A4	20_dpr18_ uas_stop_TrpA1_ FruFLP3_male alone		Abdominal bending	0	0	600
TrpB4_H4	20_dpr18_ uas_stop_TrpA1_ FruFLP4_male alone		Abdominal bending	0	0	600
TrpB4_G3	20_dpr18_ uas_stop_TrpA1_ FruFLP5_male alone		Abdominal bending	0	0	600
TrpB4_D1	20_dpr18_ uas_stop_TrpA1_ FruFLP6_male alone		Abdominal bending	0	0	600
TrpB4_D7	20_dpr18_ uas_stop_TrpA1_ FruFLP7_male alone		Abdominal bending	0	0	600
TrpB4_A1	20_dpr18_ uas_stop_TrpA1_ FruFLP8_male alone		Abdominal bending	0	0	600
TrpB4_C2	20_dpr18_ uas_stop_TrpA1_ FruFLP9_male alone		Abdominal bending	0	0	600
TrpB1_K7	20_dpr2_gal4, uas_stop_Trpa1, FruFLP1_male alone		Abdominal bending	0	0	600
TrpB1_G5	20_dpr2_gal4, uas_stop_Trpa1, FruFLP10_male alone		Abdominal bending	0	0	600
TrpB1_D7	20_dpr2_gal4, uas_stop_Trpa1, FruFLP2_male alone		Abdominal bending	0	0	600
TrpB1_C5	20_dpr2_gal4, uas_stop_Trpa1, FruFLP3_male alone		Abdominal bending	0	0	600
TrpB1_M6	20_dpr2_gal4, uas_stop_Trpa1, FruFLP4_male alone		Abdominal bending	0	0	600
TrpB1_C7	20_dpr2_gal4, uas_stop_Trpa1, FruFLP5_male alone		Abdominal bending	0	0	600
TrpB1_L1	20_dpr2_gal4, uas_stop_Trpa1, FruFLP6_male alone		Abdominal bending	0	0	600
TrpB1_J3	20_dpr2_gal4, uas_stop_Trpa1, FruFLP7_male alone		Abdominal bending	0	0	600
TrpB1_J5	20_dpr2_gal4, uas_stop_Trpa1, FruFLP8_male alone		Abdominal bending	0	0	600
TrpB1_K6	20_dpr2_gal4, uas_stop_Trpa1, FruFLP9_male alone		Abdominal bending	0	0	600
TrpB2_D9	20_dpr3_ uas_stop_TrpA1_ FruFLP1_male alone	Abdomen bobbing ~200	Abdominal bending	1	1.93288	600
TrpB2_G5	20_dpr3_ uas_stop_TrpA1_ FruFLP10_male alone		Abdominal bending	0	0	600
TrpB2_M4	20_dpr3_ uas_stop_TrpA1_ FruFLP2_male alone		Abdominal bending	0	0	600
TrpB2_G9	20_dpr3_ uas_stop_TrpA1_ FruFLP3_male alone		Abdominal bending	0	0	600
TrpB2_J9	20_dpr3_ uas_stop_TrpA1_ FruFLP4_male alone		Abdominal bending	0	0	600
TrpB2_J3	20_dpr3_ uas_stop_TrpA1_ FruFLP5_male alone		Abdominal bending	0	0	600
TrpB2_L2	20_dpr3_ uas_stop_TrpA1_ FruFLP6_male alone		Abdominal bending	0	0	600
TrpB2_J4	20_dpr3_ uas_stop_TrpA1_ FruFLP7_male alone		Abdominal bending	0	0	600
TrpB2_C2	20_dpr3_ uas_stop_TrpA1_ FruFLP8_male alone		Abdominal bending	7	9.836	600
TrpB2_F7	20_dpr3_ uas_stop_TrpA1_ FruFLP9_male alone		Abdominal bending	0	0	600
TrpB5_B5	20_dpr4_ uas_stop_TrpA1_ FruFLP1_male alone	Jerky movements, falling, loss of righting, proboscis extension	Abdominal bending	0	0	600
TrpB5_H4	20_dpr4_ uas_stop_TrpA1_ FruFLP10_male alone		Abdominal bending	0	0	600
TrpB5_N5	20_dpr4_ uas_stop_TrpA1_ FruFLP2_male alone		Abdominal bending	0	0	600
TrpB5_G2	20_dpr4_ uas_stop_TrpA1_ FruFLP3_male alone		Abdominal bending	0	0	600
TrpB5_A4	20_dpr4_ uas_stop_TrpA1_ FruFLP4_male alone		Abdominal bending	0	0	600
TrpB5_B9	20_dpr4_ uas_stop_TrpA1_ FruFLP5_male alone		Abdominal bending	0	0	600
TrpB5_L7	20_dpr4_ uas_stop_TrpA1_ FruFLP6_male alone		Abdominal bending	0	0	600
TrpB5_B3	20_dpr4_ uas_stop_TrpA1_ FruFLP7_male alone		Abdominal bending	0	0	600
TrpB5_G5	20_dpr4_ uas_stop_TrpA1_ FruFLP8_male alone		Abdominal bending	0	0	600
TrpB5_J3	20_dpr4_ uas_stop_TrpA1_ FruFLP9_male alone		Abdominal bending	2	3.706	600
TrpB4_J4	20_dpr5_ uas_stop_TrpA1_ FruFLP1_male alone	abdomen bobbing	Abdominal bending	0	0	600
TrpB4_B3	20_dpr5_ uas_stop_TrpA1_ FruFLP10_male alone		Abdominal bending	0	0	600
TrpB4_K9	20_dpr5_ uas_stop_TrpA1_ FruFLP2_male alone		Abdominal bending	0	0	600
TrpB4_J3	20_dpr5_ uas_stop_TrpA1_ FruFLP3_male alone		Abdominal bending	0	0	600
TrpB4_F4	20_dpr5_ uas_stop_TrpA1_ FruFLP4_male alone		Abdominal bending	0	0	600
TrpB4_A2	20_dpr5_ uas_stop_TrpA1_ FruFLP5_male alone		Abdominal bending	0	0	600
TrpB4_A6	20_dpr5_ uas_stop_TrpA1_ FruFLP6_male alone	abdomen bobbing	Abdominal bending	0	0	600
TrpB4_E3	20_dpr5_ uas_stop_TrpA1_ FruFLP7_male alone		Abdominal bending	0	0	600
TrpB4_B8	20_dpr5_ uas_stop_TrpA1_ FruFLP8_male alone		Abdominal bending	0	0	600
TrpB4_B9	20_dpr5_ uas_stop_TrpA1_ FruFLP9_male alone		Abdominal bending	0	0	600
TrpB5_H7	20_dpr6_ uas_stop_TrpA1_ FruFLP1_male alone		Abdominal bending	0	0	600
TrpB5_D7	20_dpr6_ uas_stop_TrpA1_ FruFLP10_male alone	lots of head rubbing	Abdominal bending	0	0	600
TrpB5_K3	20_dpr6_ uas_stop_TrpA1_ FruFLP2_male alone		Abdominal bending	0	0	600
TrpB5_J1	20_dpr6_ uas_stop_TrpA1_ FruFLP3_male alone		Abdominal bending	0	0	600
TrpB5_F9	20_dpr6_ uas_stop_TrpA1_ FruFLP4_male alone		Abdominal bending	0	0	600
TrpB5_N4	20_dpr6_ uas_stop_TrpA1_ FruFLP5_male alone	lots of head rubbing	Abdominal bending	0	0	600
TrpB5_L8	20_dpr6_ uas_stop_TrpA1_ FruFLP6_male alone		Abdominal bending	0	0	600
TrpB5_K7	20_dpr6_ uas_stop_TrpA1_ FruFLP7_male alone		Abdominal bending	0	0	600
TrpB5_D6	20_dpr6_ uas_stop_TrpA1_ FruFLP8_male alone		Abdominal bending	0	0	600
TrpB5_G8	20_dpr6_ uas_stop_TrpA1_ FruFLP9_male alone	short bursts of loss of righting	Abdominal bending	0	0	600
TrpB4_C9	20_dpr8_ uas_stop_TrpA1_ FruFLP1_male alone	abdomen bobbing	Abdominal bending	0	0	600
TrpB4_K5	20_dpr8_ uas_stop_TrpA1_ FruFLP10_male alone		Abdominal bending	0	0	600
TrpB4_F9	20_dpr8_ uas_stop_TrpA1_ FruFLP2_male alone	abdomen bobbing, probsicis ext. ~415	Abdominal bending	0	0	600
TrpB4_B4	20_dpr8_ uas_stop_TrpA1_ FruFLP3_male alone		Abdominal bending	0	0	600
TrpB4_H5	20_dpr8_ uas_stop_TrpA1_ FruFLP4_male alone	abdomen bobbing	Abdominal bending	0	0	600
TrpB4_E2	20_dpr8_ uas_stop_TrpA1_ FruFLP5_male alone		Abdominal bending	0	0	600
TrpB4_J1	20_dpr8_ uas_stop_TrpA1_ FruFLP6_male alone		Abdominal bending	0	0	600
TrpB4_D6	20_dpr8_ uas_stop_TrpA1_ FruFLP7_male alone		Abdominal bending	0	0	600
TrpB4_J9	20_dpr8_ uas_stop_TrpA1_ FruFLP8_male alone		Abdominal bending	0	0	600
TrpB4_L2	20_dpr8_ uas_stop_TrpA1_ FruFLP9_male alone		Abdominal bending	0	0	600
TrpB4_E9	20_dpr9_gal4, uas_stop_Trpa1, FruFLP_male alone 1	Lots of head rubbing	Abdominal bending	0	0	600
TrpB4_B2	20_dpr9_gal4, uas_stop_Trpa1, FruFLP_male alone 10		Abdominal bending	0	0	600
TrpB4_L7	20_dpr9_gal4, uas_stop_Trpa1, FruFLP_male alone 11		Abdominal bending	0	0	600
TrpB4_H8	20_dpr9_gal4, uas_stop_Trpa1, FruFLP_male alone 2		Abdominal bending	0	0	600
TrpB4_A7	20_dpr9_gal4, uas_stop_Trpa1, FruFLP_male alone 3		Abdominal bending	0	0	600
TrpB4_G4	20_dpr9_gal4, uas_stop_Trpa1, FruFLP_male alone 4		Abdominal bending	0	0	600
TrpB4_M5	20_dpr9_gal4, uas_stop_Trpa1, FruFLP_male alone 5		Abdominal bending	0	0	600
TrpB4_D8	20_dpr9_gal4, uas_stop_Trpa1, FruFLP_male alone 6		Abdominal bending	0	0	600
TrpB4_H1	20_dpr9_gal4, uas_stop_Trpa1, FruFLP_male alone 7		Abdominal bending	0	0	600
TrpB4_M1	20_dpr9_gal4, uas_stop_Trpa1, FruFLP_male alone 8		Abdominal bending	0	0	600
TrpB5_H1	20_FruFLP1_male alone		Abdominal bending	0	0	600
TrpB5_C2	20_FruFLP10_male alone		Abdominal bending	0	0	600
TrpB5_M3	20_FruFLP2_male alone		Abdominal bending	0	0	600
TrpB5_E2	20_FruFLP3_male alone		Abdominal bending	0	0	600
TrpB5_F8	20_FruFLP4_male alone		Abdominal bending	0	0	600
TrpB5_H6	20_FruFLP5_male alone		Abdominal bending	0	0	600
TrpB5_D9	20_FruFLP6_male alone		Abdominal bending	0	0	600
TrpB5_E6	20_FruFLP7_male alone		Abdominal bending	0	0	600
TrpB5_H2	20_FruFLP8_male alone		Abdominal bending	0	0	600
TrpB5_N3	20_FruFLP9_male alone		Abdominal bending	0	0	600
TrpB5_J7	20_TrpA1_1_male alone		Abdominal bending	0	0	600
TrpB5_E9	20_TrpA1_10_male alone		Abdominal bending	0	0	600
TrpB5_N1	20_TrpA1_2_male alone		Abdominal bending	0	0	600
TrpB5_O1	20_TrpA1_3_male alone		Abdominal bending	0	0	600
TrpB5_F5	20_TrpA1_4_male alone	funny wings-- they look spread but not vibrating	Abdominal bending	0	0	600
TrpB5_O3	20_TrpA1_5_male alone		Abdominal bending	0	0	600
TrpB5_N9	20_TrpA1_6_male alone		Abdominal bending	0	0	600
TrpB5_C9	20_TrpA1_7_male alone		Abdominal bending	0	0	600
TrpB5_M1	20_TrpA1_8_male alone		Abdominal bending	0	0	600
TrpB5_H3	20_TrpA1_9_male alone	jerky walking-- loss of righting	Abdominal bending	0	0	600
TrpB5_H8	30_CS1_male alone		Abdominal bending	0	0	600
TrpB5_J5	30_CS10_male alone		Abdominal bending	0	0	600
TrpB5_B2	30_CS2_male alone		Abdominal bending	0	0	600
TrpB5_M2	30_CS3_male alone		Abdominal bending	0	0	600
TrpB5_K6	30_CS4_male alone		Abdominal bending	0	0	600
TrpB5_G9	30_CS5_male alone		Abdominal bending	0	0	600
TrpB5_D1	30_CS6_male alone		Abdominal bending	0	0	600
TrpB5_D3	30_CS7_male alone		Abdominal bending	0	0	600
TrpB5_D5	30_CS8_male alone		Abdominal bending	0	0	600
TrpB5_B1	30_CS9_male alone		Abdominal bending	0	0	600
TrpB2_K4	30_DIPalpha_ uas_stop_TrpA1_ FruFLP1_male alone		Abdominal bending	0	0	600
TrpB2_J2	30_DIPalpha_ uas_stop_TrpA1_ FruFLP10_male alone		Abdominal bending	0	0	600
TrpB2_C4	30_DIPalpha_ uas_stop_TrpA1_ FruFLP2_male alone		Abdominal bending	0	0	600
TrpB2_J6	30_DIPalpha_ uas_stop_TrpA1_ FruFLP3_male alone		Abdominal bending	0	0	600
TrpB2_C8	30_DIPalpha_ uas_stop_TrpA1_ FruFLP4_male alone		Abdominal bending	0	0	600
TrpB2_D1	30_DIPalpha_ uas_stop_TrpA1_ FruFLP5_male alone		Abdominal bending	0	0	600
TrpB2_F9	30_DIPalpha_ uas_stop_TrpA1_ FruFLP6_male alone		Abdominal bending	0	0	600
TrpB2_B8	30_DIPalpha_ uas_stop_TrpA1_ FruFLP7_male alone	Very jerky. Leg extension?	Abdominal bending	0	0	600
TrpB2_K1	30_DIPalpha_ uas_stop_TrpA1_ FruFLP8_male alone	Jerky/funny leg movements	Abdominal bending	0	0	600
TrpB2_L3	30_DIPalpha_ uas_stop_TrpA1_ FruFLP9_male alone		Abdominal bending	0	0	600
TrpB1_G1	30_DIPbeta_gal4, uas_stop_Trpa1, FruFLP1_male alone		Abdominal bending	0	0	600
TrpB1_B8	30_DIPbeta_gal4, uas_stop_Trpa1, FruFLP10_male alone		Abdominal bending	0	0	600
TrpB1_H6	30_DIPbeta_gal4, uas_stop_Trpa1, FruFLP2_male alone		Abdominal bending	0	0	600
TrpB1_J6	30_DIPbeta_gal4, uas_stop_Trpa1, FruFLP3_male alone		Abdominal bending	0	0	600
TrpB1_B1	30_DIPbeta_gal4, uas_stop_Trpa1, FruFLP4_male alone		Abdominal bending	0	0	600
TrpB1_G9	30_DIPbeta_gal4, uas_stop_Trpa1, FruFLP5_male alone		Abdominal bending	0	0	600
TrpB1_A1	30_DIPbeta_gal4, uas_stop_Trpa1, FruFLP6_male alone		Abdominal bending	0	0	600
TrpB1_D5	30_DIPbeta_gal4, uas_stop_Trpa1, FruFLP7_male alone		Abdominal bending	0	0	600
TrpB1_G8	30_DIPbeta_gal4, uas_stop_Trpa1, FruFLP8_male alone		Abdominal bending	0	0	600
TrpB1_B3	30_DIPbeta_gal4, uas_stop_Trpa1, FruFLP9_male alone		Abdominal bending	0	0	600
TrpB3_L5	30_DIPdelta_ uas_stop_TrpA1_ FruFLP1_male alone	Jerky walking ~200	Abdominal bending	0	0	600
TrpB3_K1	30_DIPdelta_ uas_stop_TrpA1_ FruFLP10_male alone	abdomen bobbing	Abdominal bending	0	0	600
TrpB3_E7	30_DIPdelta_ uas_stop_TrpA1_ FruFLP2_male alone		Abdominal bending	0	0	600
TrpB3_H9	30_DIPdelta_ uas_stop_TrpA1_ FruFLP3_male alone		Abdominal bending	0	0	600
TrpB3_F3	30_DIPdelta_ uas_stop_TrpA1_ FruFLP4_male alone		Abdominal bending	0	0	600
TrpB3_J9	30_DIPdelta_ uas_stop_TrpA1_ FruFLP5_male alone		Abdominal bending	0	0	600
TrpB3_J2	30_DIPdelta_ uas_stop_TrpA1_ FruFLP6_male alone		Abdominal bending	0	0	600
TrpB3_E9	30_DIPdelta_ uas_stop_TrpA1_ FruFLP7_male alone		Abdominal bending	0	0	600
TrpB3_F7	30_DIPdelta_ uas_stop_TrpA1_ FruFLP8_male alone		Abdominal bending	0	0	600
TrpB3_D1	30_DIPdelta_ uas_stop_TrpA1_ FruFLP9_male alone		Abdominal bending	0	0	600
TrpB2_M1	30_DIPepsilon_ uas_stop_TrpA1_ FruFLP1_male alone		Abdominal bending	0	0	600
TrpB2_G6	30_DIPepsilon_ uas_stop_TrpA1_ FruFLP10_male alone		Abdominal bending	0	0	600
TrpB2_J5	30_DIPepsilon_ uas_stop_TrpA1_ FruFLP2_male alone		Abdominal bending	0	0	600
TrpB2_H4	30_DIPepsilon_ uas_stop_TrpA1_ FruFLP3_male alone		Abdominal bending	0	0	600
TrpB2_M3	30_DIPepsilon_ uas_stop_TrpA1_ FruFLP4_male alone		Abdominal bending	0	0	600
TrpB2_H7	30_DIPepsilon_ uas_stop_TrpA1_ FruFLP5_male alone		Abdominal bending	0	0	600
TrpB2_L4	30_DIPepsilon_ uas_stop_TrpA1_ FruFLP6_male alone		Abdominal bending	0	0	600
TrpB2_B4	30_DIPepsilon_ uas_stop_TrpA1_ FruFLP7_male alone		Abdominal bending	0	0	600
TrpB2_C3	30_DIPepsilon_ uas_stop_TrpA1_ FruFLP8_male alone		Abdominal bending	0	0	600
TrpB2_E9	30_DIPepsilon_ uas_stop_TrpA1_ FruFLP9_male alone		Abdominal bending	0	0	600
TrpB2_B9	30_DIPeta_ uas_stop_TrpA1_ FruFLP1_male alone		Abdominal bending	0	0	600
TrpB2_D7	30_DIPeta_ uas_stop_TrpA1_ FruFLP10_male alone		Abdominal bending	0	0	600
TrpB2_B7	30_DIPeta_ uas_stop_TrpA1_ FruFLP2_male alone		Abdominal bending	0	0	600
TrpB2_G8	30_DIPeta_ uas_stop_TrpA1_ FruFLP3_male alone		Abdominal bending	0	0	600
TrpB2_A3	30_DIPeta_ uas_stop_TrpA1_ FruFLP4_male alone		Abdominal bending	0	0	591.065
TrpB2_G1	30_DIPeta_ uas_stop_TrpA1_ FruFLP5_male alone		Abdominal bending	0	0	600
TrpB2_M6	30_DIPeta_ uas_stop_TrpA1_ FruFLP6_male alone		Abdominal bending	0	0	600
TrpB2_A9	30_DIPeta_ uas_stop_TrpA1_ FruFLP7_male alone		Abdominal bending	0	0	600
TrpB2_M2	30_DIPeta_ uas_stop_TrpA1_ FruFLP8_male alone		Abdominal bending	0	0	600
TrpB2_G4	30_DIPeta_ uas_stop_TrpA1_ FruFLP9_male alone		Abdominal bending	0	0	600
TrpB2_A1	30_DIPgamma_ uas_stop_TrpA1_ FruFLP1_male alone		Abdominal bending	5	532.68	600
TrpB2_E7	30_DIPgamma_ uas_stop_TrpA1_ FruFLP10_male alone		Abdominal bending	0	0	600
TrpB2_H1	30_DIPgamma_ uas_stop_TrpA1_ FruFLP2_male alone		Abdominal bending	1	541.877	600
TrpB2_H2	30_DIPgamma_ uas_stop_TrpA1_ FruFLP3_male alone		Abdominal bending	0	0	600
TrpB2_F3	30_DIPgamma_ uas_stop_TrpA1_ FruFLP4_male alone		Abdominal bending	8	30.0317	600
TrpB2_H5	30_DIPgamma_ uas_stop_TrpA1_ FruFLP5_male alone		Abdominal bending	0	0	600
TrpB2_L6	30_DIPgamma_ uas_stop_TrpA1_ FruFLP6_male alone	Abdomen bobbing- spins in circles occasionally. In beginning and ~270	Abdominal bending	3	6.062	600
TrpB2_E2	30_DIPgamma_ uas_stop_TrpA1_ FruFLP7_male alone		Abdominal bending	0	0	600
TrpB2_K3	30_DIPgamma_ uas_stop_TrpA1_ FruFLP8_male alone		Abdominal bending	8	46.756	600
TrpB2_L5	30_DIPgamma_ uas_stop_TrpA1_ FruFLP9_male alone		Abdominal bending	0	0	600
TrpB3_A2	30_DIPtheta_ uas_stop_TrpA1_ FruFLP1_male alone		Abdominal bending	0	0	600
TrpB3_L7	30_DIPtheta_ uas_stop_TrpA1_ FruFLP10_male alone		Abdominal bending	4	115.435	600
TrpB3_E4	30_DIPtheta_ uas_stop_TrpA1_ FruFLP2_male alone	ejaculation around 50?	Abdominal bending	8	251.941	600
TrpB3_A6	30_DIPtheta_ uas_stop_TrpA1_ FruFLP3_male alone		Abdominal bending	5	45.85	600
TrpB3_M2	30_DIPtheta_ uas_stop_TrpA1_ FruFLP4_male alone		Abdominal bending	11	113.819	600
TrpB3_F1	30_DIPtheta_ uas_stop_TrpA1_ FruFLP5_male alone		Abdominal bending	3	42.91	600
TrpB3_A7	30_DIPtheta_ uas_stop_TrpA1_ FruFLP6_male alone	Wing flutter ~150	Abdominal bending	1	2.994	600
TrpB3_B6	30_DIPtheta_ uas_stop_TrpA1_ FruFLP7_male alone		Abdominal bending	0	0	600
TrpB3_E6	30_DIPtheta_ uas_stop_TrpA1_ FruFLP8_male alone		Abdominal bending	0	0	600
TrpB3_M1	30_DIPtheta_ uas_stop_TrpA1_ FruFLP9_male alone		Abdominal bending	0	0	600
TrpB3_L8	30_DIPzeta_ uas_stop_TrpA1_ FruFLP1_male alone		Abdominal bending	0	0	600
TrpB3_C7	30_DIPzeta_ uas_stop_TrpA1_ FruFLP10_male alone		Abdominal bending	0	0	600
TrpB3_L2	30_DIPzeta_ uas_stop_TrpA1_ FruFLP2_male alone		Abdominal bending	0	0	600
TrpB3_D3	30_DIPzeta_ uas_stop_TrpA1_ FruFLP3_male alone		Abdominal bending	0	0	600
TrpB3_H4	30_DIPzeta_ uas_stop_TrpA1_ FruFLP4_male alone		Abdominal bending	0	0	600
TrpB3_C3	30_DIPzeta_ uas_stop_TrpA1_ FruFLP5_male alone		Abdominal bending	0	0	600
TrpB3_C1	30_DIPzeta_ uas_stop_TrpA1_ FruFLP6_male alone		Abdominal bending	0	0	600
TrpB3_B2	30_DIPzeta_ uas_stop_TrpA1_ FruFLP7_male alone		Abdominal bending	0	0	600
TrpB3_D5	30_DIPzeta_ uas_stop_TrpA1_ FruFLP8_male alone		Abdominal bending	0	0	600
TrpB3_D9	30_DIPzeta_ uas_stop_TrpA1_ FruFLP9_male alone		Abdominal bending	0	0	600
TrpB4_G6	30_dpr1_ uas_stop_TrpA1_ FruFLP1_male alone		Abdominal bending	0	0	600
TrpB4_H7	30_dpr1_ uas_stop_TrpA1_ FruFLP10_male alone		Abdominal bending	0	0	600
TrpB4_B6	30_dpr1_ uas_stop_TrpA1_ FruFLP2_male alone		Abdominal bending	0	0	592.998
TrpB4_L8	30_dpr1_ uas_stop_TrpA1_ FruFLP3_male alone	loss of righting reflex. I think the wing ext. is throwing him off balance	Abdominal bending	0	0	600
TrpB4_M2	30_dpr1_ uas_stop_TrpA1_ FruFLP4_male alone		Abdominal bending	1	2.452	600
TrpB4_K8	30_dpr1_ uas_stop_TrpA1_ FruFLP5_male alone	weird "bucking" beahvior ~300	Abdominal bending	0	0	600
TrpB4_L6	30_dpr1_ uas_stop_TrpA1_ FruFLP6_male alone	a lot of head rubbing	Abdominal bending	0	0	589.598
TrpB4_C5	30_dpr1_ uas_stop_TrpA1_ FruFLP7_male alone	abdomen bobbing - but does stop	Abdominal bending	0	0	600
TrpB4_G2	30_dpr1_ uas_stop_TrpA1_ FruFLP8_male alone		Abdominal bending	0	0	600
TrpB4_H6	30_dpr1_ uas_stop_TrpA1_ FruFLP9_male alone		Abdominal bending	0	0	600
TrpB1_D4	30_dpr10_gal4, uas_stop_Trpa1, FruFLP_male alone 1		Abdominal bending	0	0	600
TrpB1_G4	30_dpr10_gal4, uas_stop_Trpa1, FruFLP_male alone 10		Abdominal bending	14	287.948	600
TrpB1_K3	30_dpr10_gal4, uas_stop_Trpa1, FruFLP_male alone 2		Abdominal bending	7	323.84	600
TrpB1_L2	30_dpr10_gal4, uas_stop_Trpa1, FruFLP_male alone 3		Abdominal bending	14	227.427	600
TrpB1_C9	30_dpr10_gal4, uas_stop_Trpa1, FruFLP_male alone 4		Abdominal bending	7	224.745	600
TrpB1_H8	30_dpr10_gal4, uas_stop_Trpa1, FruFLP_male alone 5		Abdominal bending	7	530.546	600
TrpB1_E8	30_dpr10_gal4, uas_stop_Trpa1, FruFLP_male alone 6		Abdominal bending	5	498.674	600
TrpB1_B9	30_dpr10_gal4, uas_stop_Trpa1, FruFLP_male alone 8		Abdominal bending	1	598.211	600
TrpB1_J2	30_dpr10_gal4, uas_stop_Trpa1, FruFLP_male alone 9		Abdominal bending	11	246.115	600
TrpB1_M4	30_dpr10_gal4, uas_stop_Trpa1, FruFLP_male alone 9		Abdominal bending	14	283.413	600
TrpB1_E6	30_dpr11_gal4, uas_stop_Trpa1, FruFLP1_male alone		Abdominal bending	0	0	600
TrpB1_H7	30_dpr11_gal4, uas_stop_Trpa1, FruFLP10_male alone		Abdominal bending	0	0	600
TrpB1_D1	30_dpr11_gal4, uas_stop_Trpa1, FruFLP2_male alone		Abdominal bending	0	0	600
TrpB1_H1	30_dpr11_gal4, uas_stop_Trpa1, FruFLP3_male alone		Abdominal bending	9	17.498	595.33
TrpB1_G2	30_dpr11_gal4, uas_stop_Trpa1, FruFLP4_male alone		Abdominal bending	0	0	600
TrpB1_M3	30_dpr11_gal4, uas_stop_Trpa1, FruFLP5_male alone		Abdominal bending	3	3.067	600
TrpB1_K4	30_dpr11_gal4, uas_stop_Trpa1, FruFLP6_male alone		Abdominal bending	0	0	600
TrpB1_B5	30_dpr11_gal4, uas_stop_Trpa1, FruFLP7_male alone		Abdominal bending	0	0	600
TrpB1_E4	30_dpr11_gal4, uas_stop_Trpa1, FruFLP8_male alone		Abdominal bending	5	416.833	600
TrpB1_L8	30_dpr11_gal4, uas_stop_Trpa1, FruFLP9_male alone		Abdominal bending	1	2.585	600
TrpB1_B7	30_dpr12_gal4, uas_stop_Trpa1, FruFLP_male alone 1		Abdominal bending	0	0	600
TrpB2_B1	30_dpr12_gal4, uas_stop_Trpa1, FruFLP_male alone 10		Abdominal bending	7	438.518	600
TrpB1_F4	30_dpr12_gal4, uas_stop_Trpa1, FruFLP_male alone 2		Abdominal bending	3	550.878	600
TrpB1_C8	30_dpr12_gal4, uas_stop_Trpa1, FruFLP_male alone 4	ejaculation ~489	Abdominal bending	12	159.84	600
TrpB1_L5	30_dpr12_gal4, uas_stop_Trpa1, FruFLP_male alone 5		Abdominal bending	1	238.738	600
TrpB1_M5	30_dpr12_gal4, uas_stop_Trpa1, FruFLP_male alone 5		Abdominal bending	1	568.5	600
TrpB2_F5	30_dpr12_gal4, uas_stop_Trpa1, FruFLP_male alone 6		Abdominal bending	1	580.584	600
TrpB2_E5	30_dpr12_gal4, uas_stop_Trpa1, FruFLP_male alone 7	ejaculation ~259	Abdominal bending	1	580.428	600
TrpB2_K2	30_dpr12_gal4, uas_stop_Trpa1, FruFLP_male alone 8		Abdominal bending	1	4.516	600
TrpB2_K8	30_dpr12_gal4, uas_stop_Trpa1, FruFLP_male alone 9	ejaculation ~126	Abdominal bending	2	136.872	600
TrpB5_M8	30_dpr14_ uas_stop_TrpA1_ FruFLP1_male alone	in the 1st 2/3rds of video, fly was positioned in such a way that it was difficult to see the abdomen but it appeared as though fly was rubbing external genitalia a bunch	Abdominal bending	2	13.172	600
TrpB5_E3	30_dpr14_ uas_stop_TrpA1_ FruFLP10_male alone		Abdominal bending	0	0	600
TrpB5_C8	30_dpr14_ uas_stop_TrpA1_ FruFLP2_male alone		Abdominal bending	12	237.917	600
TrpB5_G6	30_dpr14_ uas_stop_TrpA1_ FruFLP3_male alone	wing fluttering,, not as far as extension	Abdominal bending	0	0	600
TrpB5_F7	30_dpr14_ uas_stop_TrpA1_ FruFLP4_male alone	more wing fluttering less ext.	Abdominal bending	4	411.77	600
TrpB5_B6	30_dpr14_ uas_stop_TrpA1_ FruFLP5_male alone		Abdominal bending	7	164.352	600
TrpB5_A3	30_dpr14_ uas_stop_TrpA1_ FruFLP6_male alone		Abdominal bending	6	458.738	600
TrpB5_D8	30_dpr14_ uas_stop_TrpA1_ FruFLP7_male alone		Abdominal bending	4	16.434	600
TrpB5_K5	30_dpr14_ uas_stop_TrpA1_ FruFLP8_male alone	ejaculation~ 65?	Abdominal bending	1	476.158	600
TrpB5_E8	30_dpr14_ uas_stop_TrpA1_ FruFLP9_male alone		Abdominal bending	2	4.26	600
TrpB3_G5	30_dpr15_ uas_stop_TrpA1_ FruFLP1_male alone		Abdominal bending	1	17.251	600
TrpB3_K5	30_dpr15_ uas_stop_TrpA1_ FruFLP10_male alone	Definitely vibrating wing but not extending very far	Abdominal bending	0	0	600
TrpB3_K4	30_dpr15_ uas_stop_TrpA1_ FruFLP2_male alone		Abdominal bending	1	63.531	600
TrpB3_B8	30_dpr15_ uas_stop_TrpA1_ FruFLP3_male alone		Abdominal bending	1	1.669	600
TrpB3_D6	30_dpr15_ uas_stop_TrpA1_ FruFLP4_male alone		Abdominal bending	0	0	600
TrpB3_K2	30_dpr15_ uas_stop_TrpA1_ FruFLP5_male alone		Abdominal bending	1	2.099	600
TrpB3_G9	30_dpr15_ uas_stop_TrpA1_ FruFLP6_male alone		Abdominal bending	2	83.934	600
TrpB3_J8	30_dpr15_ uas_stop_TrpA1_ FruFLP7_male alone		Abdominal bending	0	0	600
TrpB3_G7	30_dpr15_ uas_stop_TrpA1_ FruFLP8_male alone		Abdominal bending	0	0	600
TrpB3_F6	30_dpr15_ uas_stop_TrpA1_ FruFLP9_male alone	Can't tell if wings stuck out or dbl wing ext.	Abdominal bending	0	0	600
TrpB3_A5	30_dpr16_ uas_stop_TrpA1_ FruFLP1_male alone		Abdominal bending	0	0	600
TrpB3_K6	30_dpr16_ uas_stop_TrpA1_ FruFLP10_male alone		Abdominal bending	0	0	600
TrpB3_B3	30_dpr16_ uas_stop_TrpA1_ FruFLP2_male alone		Abdominal bending	0	0	600
TrpB3_L1	30_dpr16_ uas_stop_TrpA1_ FruFLP3_male alone		Abdominal bending	0	0	600
TrpB3_G2	30_dpr16_ uas_stop_TrpA1_ FruFLP4_male alone		Abdominal bending	0	0	600
TrpB3_L3	30_dpr16_ uas_stop_TrpA1_ FruFLP5_male alone		Abdominal bending	0	0	600
TrpB3_H1	30_dpr16_ uas_stop_TrpA1_ FruFLP6_male alone		Abdominal bending	0	0	600
TrpB3_G6	30_dpr16_ uas_stop_TrpA1_ FruFLP7_male alone		Abdominal bending	0	0	600
TrpB3_J1	30_dpr16_ uas_stop_TrpA1_ FruFLP8_male alone		Abdominal bending	0	0	600
TrpB3_A9	30_dpr16_ uas_stop_TrpA1_ FruFLP9_male alone		Abdominal bending	0	0	600
TrpB1_A4	30_dpr17_gal4, uas_stop_Trpa1, FruFLP1_male alone		Abdominal bending	0	0	600
TrpB1_F5	30_dpr17_gal4, uas_stop_Trpa1, FruFLP10_male alone		Abdominal bending	0	0	600
TrpB1_E7	30_dpr17_gal4, uas_stop_Trpa1, FruFLP2_male alone		Abdominal bending	0	0	600
TrpB1_M1	30_dpr17_gal4, uas_stop_Trpa1, FruFLP3_male alone		Abdominal bending	0	0	600
TrpB1_F6	30_dpr17_gal4, uas_stop_Trpa1, FruFLP4_male alone		Abdominal bending	0	0	600
TrpB1_F2	30_dpr17_gal4, uas_stop_Trpa1, FruFLP5_male alone		Abdominal bending	0	0	600
TrpB1_B4	30_dpr17_gal4, uas_stop_Trpa1, FruFLP6_male alone		Abdominal bending	0	0	600
TrpB1_C6	30_dpr17_gal4, uas_stop_Trpa1, FruFLP7_male alone		Abdominal bending	0	0	600
TrpB1_J8	30_dpr17_gal4, uas_stop_Trpa1, FruFLP8_male alone		Abdominal bending	0	0	600
TrpB1_B2	30_dpr17_gal4, uas_stop_Trpa1, FruFLP9_male alone		Abdominal bending	0	0	600
TrpB4_K1	30_dpr18_ uas_stop_TrpA1_ FruFLP1_male alone		Abdominal bending	0	0	600
TrpB4_H9	30_dpr18_ uas_stop_TrpA1_ FruFLP10_male alone		Abdominal bending	0	0	600
TrpB4_F5	30_dpr18_ uas_stop_TrpA1_ FruFLP2_male alone	less wing extension more wing vibration	Abdominal bending	2	4.433	600
TrpB4_E6	30_dpr18_ uas_stop_TrpA1_ FruFLP3_male alone		Abdominal bending	0	0	600
TrpB4_J5	30_dpr18_ uas_stop_TrpA1_ FruFLP4_male alone		Abdominal bending	1	519.958	600
TrpB4_J6	30_dpr18_ uas_stop_TrpA1_ FruFLP5_male alone		Abdominal bending	5	97.9652	600
TrpB4_F2	30_dpr18_ uas_stop_TrpA1_ FruFLP6_male alone		Abdominal bending	3	541.825	600
TrpB4_L5	30_dpr18_ uas_stop_TrpA1_ FruFLP7_male alone		Abdominal bending	4	4.185	600
TrpB4_E4	30_dpr18_ uas_stop_TrpA1_ FruFLP8_male alone		Abdominal bending	0	0	600
TrpB4_D2	30_dpr18_ uas_stop_TrpA1_ FruFLP9_male alone		Abdominal bending	0	0	600
TrpB1_F8	30_dpr2_gal4, uas_stop_Trpa1, FruFLP1_male alone		Abdominal bending	0	0	600
TrpB1_L3	30_dpr2_gal4, uas_stop_Trpa1, FruFLP10_male alone		Abdominal bending	0	0	600
TrpB1_K9	30_dpr2_gal4, uas_stop_Trpa1, FruFLP2_male alone		Abdominal bending	0	0	600
TrpB1_H9	30_dpr2_gal4, uas_stop_Trpa1, FruFLP3_male alone		Abdominal bending	0	0	600
TrpB1_K1	30_dpr2_gal4, uas_stop_Trpa1, FruFLP4_male alone		Abdominal bending	1	28.622	600
TrpB1_E9	30_dpr2_gal4, uas_stop_Trpa1, FruFLP5_male alone		Abdominal bending	0	0	600
TrpB1_F3	30_dpr2_gal4, uas_stop_Trpa1, FruFLP6_male alone		Abdominal bending	0	0	600
TrpB1_G7	30_dpr2_gal4, uas_stop_Trpa1, FruFLP7_male alone	Funny jerky movements. Also loss of righting	Abdominal bending	0	0	600
TrpB1_A5	30_dpr2_gal4, uas_stop_Trpa1, FruFLP8_male alone		Abdominal bending	0	0	600
TrpB1_F7	30_dpr2_gal4, uas_stop_Trpa1, FruFLP9_male alone		Abdominal bending	0	0	600
TrpB2_A8	30_dpr3_ uas_stop_TrpA1_ FruFLP1_male alone		Abdominal bending	0	0	600
TrpB2_A2	30_dpr3_ uas_stop_TrpA1_ FruFLP10_male alone		Abdominal bending	0	0	600
TrpB2_E4	30_dpr3_ uas_stop_TrpA1_ FruFLP2_male alone		Abdominal bending	0	0	600
TrpB2_G2	30_dpr3_ uas_stop_TrpA1_ FruFLP3_male alone		Abdominal bending	0	0	600
TrpB2_K6	30_dpr3_ uas_stop_TrpA1_ FruFLP4_male alone		Abdominal bending	0	0	600
TrpB2_E8	30_dpr3_ uas_stop_TrpA1_ FruFLP5_male alone		Abdominal bending	0	0	600
TrpB2_C9	30_dpr3_ uas_stop_TrpA1_ FruFLP6_male alone		Abdominal bending	0	0	600
TrpB2_D6	30_dpr3_ uas_stop_TrpA1_ FruFLP7_male alone		Abdominal bending	0	0	600
TrpB2_L1	30_dpr3_ uas_stop_TrpA1_ FruFLP8_male alone		Abdominal bending	0	0	600
TrpB2_F1	30_dpr3_ uas_stop_TrpA1_ FruFLP9_male alone		Abdominal bending	0	0	600
TrpB5_F1	30_dpr4_ uas_stop_TrpA1_ FruFLP1_male alone		Abdominal bending	6	18.249	600
TrpB5_M5	30_dpr4_ uas_stop_TrpA1_ FruFLP10_male alone		Abdominal bending	0	0	600
TrpB5_B4	30_dpr4_ uas_stop_TrpA1_ FruFLP2_male alone		Abdominal bending	0	0	600
TrpB5_M4	30_dpr4_ uas_stop_TrpA1_ FruFLP3_male alone		Abdominal bending	0	0	600
TrpB5_E4	30_dpr4_ uas_stop_TrpA1_ FruFLP4_male alone		Abdominal bending	0	0	600
TrpB5_K1	30_dpr4_ uas_stop_TrpA1_ FruFLP5_male alone		Abdominal bending	5	79.317	600
TrpB5_J6	30_dpr4_ uas_stop_TrpA1_ FruFLP6_male alone		Abdominal bending	2	138.874	600
TrpB5_A2	30_dpr4_ uas_stop_TrpA1_ FruFLP7_male alone	more wing fluttering less ext.	Abdominal bending	0	0	600
TrpB5_N6	30_dpr4_ uas_stop_TrpA1_ FruFLP8_male alone		Abdominal bending	0	0	600
TrpB5_A1	30_dpr4_ uas_stop_TrpA1_ FruFLP9_male alone	loss of righting-- more wing fluttering less of ext.	Abdominal bending	0	0	600
TrpB4_K3	30_dpr5_ uas_stop_TrpA1_ FruFLP1_male alone	ejaculation ~60	Abdominal bending	1	598.985	600
TrpB4_G7	30_dpr5_ uas_stop_TrpA1_ FruFLP10_male alone	ejaculation ~55, does not ext wings far but they are vibrating	Abdominal bending	0	0	600
TrpB4_L4	30_dpr5_ uas_stop_TrpA1_ FruFLP2_male alone		Abdominal bending	16	51.73	599.33
TrpB4_F6	30_dpr5_ uas_stop_TrpA1_ FruFLP3_male alone		Abdominal bending	0	0	600
TrpB4_A9	30_dpr5_ uas_stop_TrpA1_ FruFLP4_male alone	wing vibrations but not so much extension	Abdominal bending	0	0	600
TrpB4_M6	30_dpr5_ uas_stop_TrpA1_ FruFLP5_male alone	ejaculation ~ 75/80?	Abdominal bending	12	46.82	600
TrpB4_E1	30_dpr5_ uas_stop_TrpA1_ FruFLP6_male alone		Abdominal bending	0	0	600
TrpB4_D4	30_dpr5_ uas_stop_TrpA1_ FruFLP7_male alone	ejaculation ~185 more wing vibration less extension	Abdominal bending	6	162.87	600
TrpB4_C8	30_dpr5_ uas_stop_TrpA1_ FruFLP8_male alone	ejaculation ~75? Again ~145	Abdominal bending	0	0	600
TrpB4_A8	30_dpr5_ uas_stop_TrpA1_ FruFLP9_male alone		Abdominal bending	3	511.902	600
TrpB5_M6	30_dpr6_ uas_stop_TrpA1_ FruFLP1_male alone		Abdominal bending	0	0	600
TrpB5_J2	30_dpr6_ uas_stop_TrpA1_ FruFLP10_male alone		Abdominal bending	0	0	600
TrpB5_M7	30_dpr6_ uas_stop_TrpA1_ FruFLP2_male alone		Abdominal bending	0	0	600
TrpB5_G3	30_dpr6_ uas_stop_TrpA1_ FruFLP3_male alone		Abdominal bending	0	0	600
TrpB5_J9	30_dpr6_ uas_stop_TrpA1_ FruFLP4_male alone		Abdominal bending	0	0	600
TrpB5_G1	30_dpr6_ uas_stop_TrpA1_ FruFLP5_male alone		Abdominal bending	0	0	600
TrpB5_J8	30_dpr6_ uas_stop_TrpA1_ FruFLP6_male alone		Abdominal bending	0	0	600
TrpB5_D2	30_dpr6_ uas_stop_TrpA1_ FruFLP7_male alone		Abdominal bending	0	0	600
TrpB5_L5	30_dpr6_ uas_stop_TrpA1_ FruFLP8_male alone		Abdominal bending	12	140.246	600
TrpB5_J4	30_dpr6_ uas_stop_TrpA1_ FruFLP9_male alone		Abdominal bending	2	3.186	600
TrpB4_D3	30_dpr8_ uas_stop_TrpA1_ FruFLP1_male alone		Abdominal bending	0	0	600
TrpB4_K6	30_dpr8_ uas_stop_TrpA1_ FruFLP10_male alone		Abdominal bending	0	0	600
TrpB4_K4	30_dpr8_ uas_stop_TrpA1_ FruFLP2_male alone		Abdominal bending	0	0	600
TrpB4_M4	30_dpr8_ uas_stop_TrpA1_ FruFLP3_male alone		Abdominal bending	0	0	600
TrpB4_E7	30_dpr8_ uas_stop_TrpA1_ FruFLP4_male alone		Abdominal bending	0	0	600
TrpB4_J2	30_dpr8_ uas_stop_TrpA1_ FruFLP5_male alone		Abdominal bending	0	0	600
TrpB4_H3	30_dpr8_ uas_stop_TrpA1_ FruFLP6_male alone	sometimes flicks wings up very briefly. Not really an extension (ex. ~584)	Abdominal bending	0	0	600
TrpB4_B5	30_dpr8_ uas_stop_TrpA1_ FruFLP7_male alone		Abdominal bending	0	0	600
TrpB4_F3	30_dpr8_ uas_stop_TrpA1_ FruFLP8_male alone		Abdominal bending	0	0	600
TrpB4_B1	30_dpr8_ uas_stop_TrpA1_ FruFLP9_male alone		Abdominal bending	0	0	600
TrpB4_L9	30_dpr9_ uas_stop_TrpA1_ FruFLP1_male alone		Abdominal bending	12	433.926	600
TrpB4_D9	30_dpr9_ uas_stop_TrpA1_ FruFLP10_male alone		Abdominal bending	18	65.294	600
TrpB4_F8	30_dpr9_ uas_stop_TrpA1_ FruFLP2_male alone	ejaculation ~140	Abdominal bending	13	472.896	600
TrpB4_C1	30_dpr9_ uas_stop_TrpA1_ FruFLP3_male alone	more than abdominal bending. Clearly thrusting	Abdominal bending	2	541.383	600
TrpB4_A5	30_dpr9_ uas_stop_TrpA1_ FruFLP4_male alone		Abdominal bending	3	567.719	600
TrpB4_D5	30_dpr9_ uas_stop_TrpA1_ FruFLP5_male alone		Abdominal bending	6	17.384	600
TrpB4_J8	30_dpr9_ uas_stop_TrpA1_ FruFLP6_male alone		Abdominal bending	0	0	600
TrpB4_G5	30_dpr9_ uas_stop_TrpA1_ FruFLP7_male alone		Abdominal bending	2	2.121	600
TrpB4_M3	30_dpr9_ uas_stop_TrpA1_ FruFLP8_male alone	proboscis extensions b/w ~135 & 140-- didn’t really continue	Abdominal bending	10	259.154	600
TrpB4_L1	30_dpr9_ uas_stop_TrpA1_ FruFLP9_male alone		Abdominal bending	23	76.846	600
TrpB5_K4	30_FruFLP1_male alone		Abdominal bending	0	0	600
TrpB5_N8	30_FruFLP10_male alone	ejaculation~ 100?	Abdominal bending	3	4.987	600
TrpB5_C6	30_FruFLP2_male alone		Abdominal bending	0	0	600
TrpB5_C1	30_FruFLP3_male alone		Abdominal bending	0	0	600
TrpB5_E1	30_FruFLP4_male alone		Abdominal bending	0	0	600
TrpB5_A7	30_FruFLP5_male alone		Abdominal bending	0	0	600
TrpB5_K9	30_FruFLP6_male alone		Abdominal bending	0	0	600
TrpB5_A6	30_FruFLP7_male alone	jerky movements	Abdominal bending	0	0	600
TrpB5_C5	30_FruFLP8_male alone		Abdominal bending	0	0	600
TrpB5_D4	30_FruFLP9_male alone		Abdominal bending	0	0	600
TrpB5_A5	30_TrpA1_1_male alone		Abdominal bending	0	0	600
TrpB5_K8	30_TrpA1_10_male alone		Abdominal bending	0	0	600
TrpB5_E5	30_TrpA1_2_male alone		Abdominal bending	0	0	600
TrpB5_C4	30_TrpA1_3_male alone		Abdominal bending	0	0	600
TrpB5_C7	30_TrpA1_4_male alone		Abdominal bending	0	0	600
TrpB5_L3	30_TrpA1_5_male alone		Abdominal bending	0	0	600
TrpB5_A8	30_TrpA1_6_male alone	abdomen bobbing	Abdominal bending	0	0	600
TrpB5_L1	30_TrpA1_7_male alone	jerky sideways walking-- wing seems offset but not extending or vibrating	Abdominal bending	0	0	600
TrpB5_A9	30_TrpA1_8_male alone		Abdominal bending	0	0	600
TrpB5_O2	30_TrpA1_9_male alone		Abdominal bending	0	0	600
TrpB5_F4	20_CS1_male alone		Attempted copulation	0	0	600
TrpB5_F2	20_CS10_male alone		Attempted copulation	0	0	600
TrpB5_F3	20_CS2_male alone		Attempted copulation	0	0	600
TrpB5_B8	20_CS3_male alone		Attempted copulation	0	0	600
TrpB5_L4	20_CS4_male alone		Attempted copulation	0	0	600
TrpB5_H9	20_CS5_male alone		Attempted copulation	0	0	600
TrpB5_G4	20_CS6_male alone	proboscis ext. ~280	Attempted copulation	0	0	600
TrpB5_M9	20_CS7_male alone		Attempted copulation	0	0	600
TrpB5_N2	20_CS8_male alone		Attempted copulation	0	0	600
TrpB5_K2	20_CS9_male alone	proboscis ext. ex~145, 165, 210 & many more	Attempted copulation	0	0	600
TrpB2_L7	20_DIPalpha_ uas_stop_TrpA1_ FruFLP1_male alone		Attempted copulation	0	0	600
TrpB2_J8	20_DIPalpha_ uas_stop_TrpA1_ FruFLP10_male alone		Attempted copulation	0	0	600
TrpB2_C1	20_DIPalpha_ uas_stop_TrpA1_ FruFLP2_male alone		Attempted copulation	0	0	600
TrpB2_D2	20_DIPalpha_ uas_stop_TrpA1_ FruFLP3_male alone		Attempted copulation	0	0	600
TrpB2_F8	20_DIPalpha_ uas_stop_TrpA1_ FruFLP4_male alone		Attempted copulation	0	0	600
TrpB2_J1	20_DIPalpha_ uas_stop_TrpA1_ FruFLP5_male alone		Attempted copulation	0	0	600
TrpB2_B2	20_DIPalpha_ uas_stop_TrpA1_ FruFLP6_male alone		Attempted copulation	0	0	600
TrpB2_G7	20_DIPalpha_ uas_stop_TrpA1_ FruFLP7_male alone		Attempted copulation	0	0	600
TrpB2_D3	20_DIPalpha_ uas_stop_TrpA1_ FruFLP8_male alone		Attempted copulation	0	0	600
TrpB2_A6	20_DIPalpha_ uas_stop_TrpA1_ FruFLP9_male alone		Attempted copulation	0	0	600
TrpB1_D6	20_DIPbeta_gal4, uas_stop_Trpa1, FruFLP1_male alone		Attempted copulation	0	0	600
TrpB1_J9	20_DIPbeta_gal4, uas_stop_Trpa1, FruFLP10_male alone		Attempted copulation	0	0	600
TrpB1_L6	20_DIPbeta_gal4, uas_stop_Trpa1, FruFLP2_male alone		Attempted copulation	0	0	600
TrpB1_K8	20_DIPbeta_gal4, uas_stop_Trpa1, FruFLP3_male alone		Attempted copulation	0	0	600
TrpB1_A7	20_DIPbeta_gal4, uas_stop_Trpa1, FruFLP4_male alone		Attempted copulation	0	0	600
TrpB1_E3	20_DIPbeta_gal4, uas_stop_Trpa1, FruFLP5_male alone		Attempted copulation	1	0	600
TrpB1_F9	20_DIPbeta_gal4, uas_stop_Trpa1, FruFLP6_male alone		Attempted copulation	0	0	600
TrpB1_E2	20_DIPbeta_gal4, uas_stop_Trpa1, FruFLP7_male alone		Attempted copulation	0	0	600
TrpB1_G6	20_DIPbeta_gal4, uas_stop_Trpa1, FruFLP8_male alone		Attempted copulation	0	0	600
TrpB1_A2	20_DIPbeta_gal4, uas_stop_Trpa1, FruFLP9_male alone		Attempted copulation	0	0	600
TrpB3_D2	20_DIPdelta_ uas_stop_TrpA1_ FruFLP1_male alone		Attempted copulation	0	0	600
TrpB3_C5	20_DIPdelta_ uas_stop_TrpA1_ FruFLP10_male alone	Loss of righting--starts early	Attempted copulation	0	0	600
TrpB3_H2	20_DIPdelta_ uas_stop_TrpA1_ FruFLP2_male alone		Attempted copulation	0	0	600
TrpB3_K7	20_DIPdelta_ uas_stop_TrpA1_ FruFLP3_male alone		Attempted copulation	0	0	600
TrpB3_E3	20_DIPdelta_ uas_stop_TrpA1_ FruFLP4_male alone		Attempted copulation	0	0	600
TrpB3_E1	20_DIPdelta_ uas_stop_TrpA1_ FruFLP5_male alone	head rubbing-abdomen bobbing?	Attempted copulation	0	0	600
TrpB3_C9	20_DIPdelta_ uas_stop_TrpA1_ FruFLP6_male alone	Lots of head rubbing	Attempted copulation	0	0	600
TrpB3_A4	20_DIPdelta_ uas_stop_TrpA1_ FruFLP7_male alone		Attempted copulation	0	0	600
TrpB3_M5	20_DIPdelta_ uas_stop_TrpA1_ FruFLP8_male alone		Attempted copulation	0	0	600
TrpB3_H5	20_DIPdelta_ uas_stop_TrpA1_ FruFLP9_male alone		Attempted copulation	0	0	600
TrpB2_H9	20_DIPepsilon_ uas_stop_TrpA1_ FruFLP1_male alone	Abdomen bobbing? Hard to tell. More in the beginning	Attempted copulation	0	0	600
TrpB2_M5	20_DIPepsilon_ uas_stop_TrpA1_ FruFLP10_male alone		Attempted copulation	0	0	600
TrpB2_E6	20_DIPepsilon_ uas_stop_TrpA1_ FruFLP2_male alone		Attempted copulation	0	0	600
TrpB2_A5	20_DIPepsilon_ uas_stop_TrpA1_ FruFLP3_male alone		Attempted copulation	0	0	600
TrpB2_G3	20_DIPepsilon_ uas_stop_TrpA1_ FruFLP4_male alone		Attempted copulation	0	0	600
TrpB2_L8	20_DIPepsilon_ uas_stop_TrpA1_ FruFLP5_male alone		Attempted copulation	0	0	600
TrpB2_D8	20_DIPepsilon_ uas_stop_TrpA1_ FruFLP6_male alone	Abdomen bobbing ~400	Attempted copulation	0	0	600
TrpB2_C6	20_DIPepsilon_ uas_stop_TrpA1_ FruFLP7_male alone		Attempted copulation	0	0	600
TrpB2_A7	20_DIPepsilon_ uas_stop_TrpA1_ FruFLP8_male alone		Attempted copulation	0	0	600
TrpB2_B6	20_DIPepsilon_ uas_stop_TrpA1_ FruFLP9_male alone		Attempted copulation	0	0	600
TrpB2_D4	20_DIPeta_ uas_stop_TrpA1_ FruFLP1_male alone		Attempted copulation	0	0	600
TrpB2_K5	20_DIPeta_ uas_stop_TrpA1_ FruFLP10_male alone		Attempted copulation	0	0	600
TrpB2_E1	20_DIPeta_ uas_stop_TrpA1_ FruFLP2_male alone		Attempted copulation	0	0	600
TrpB2_F4	20_DIPeta_ uas_stop_TrpA1_ FruFLP3_male alone		Attempted copulation	0	0	600
TrpB2_B3	20_DIPeta_ uas_stop_TrpA1_ FruFLP4_male alone		Attempted copulation	0	0	600
TrpB2_D5	20_DIPeta_ uas_stop_TrpA1_ FruFLP5_male alone		Attempted copulation	0	0	600
TrpB2_K9	20_DIPeta_ uas_stop_TrpA1_ FruFLP6_male alone		Attempted copulation	0	0	600
TrpB2_H8	20_DIPeta_ uas_stop_TrpA1_ FruFLP7_male alone		Attempted copulation	0	0	600
TrpB2_F6	20_DIPeta_ uas_stop_TrpA1_ FruFLP8_male alone		Attempted copulation	0	0	600
TrpB2_H3	20_DIPeta_ uas_stop_TrpA1_ FruFLP9_male alone		Attempted copulation	0	0	600
TrpB2_J7	20_DIPgamma_ uas_stop_TrpA1_ FruFLP1_male alone		Attempted copulation	0	0	600
TrpB2_E3	20_DIPgamma_ uas_stop_TrpA1_ FruFLP10_male alone		Attempted copulation	0	0	600
TrpB2_B5	20_DIPgamma_ uas_stop_TrpA1_ FruFLP2_male alone		Attempted copulation	0	0	600
TrpB2_C5	20_DIPgamma_ uas_stop_TrpA1_ FruFLP3_male alone		Attempted copulation	0	0	600
TrpB2_K7	20_DIPgamma_ uas_stop_TrpA1_ FruFLP4_male alone		Attempted copulation	0	0	600
TrpB2_H6	20_DIPgamma_ uas_stop_TrpA1_ FruFLP5_male alone		Attempted copulation	0	0	595.597
TrpB2_A4	20_DIPgamma_ uas_stop_TrpA1_ FruFLP6_male alone		Attempted copulation	0	0	600
TrpB2_F2	20_DIPgamma_ uas_stop_TrpA1_ FruFLP7_male alone		Attempted copulation	0	0	600
TrpB2_C7	20_DIPgamma_ uas_stop_TrpA1_ FruFLP8_male alone		Attempted copulation	0	0	600
TrpB2_L9	20_DIPgamma_ uas_stop_TrpA1_ FruFLP9_male alone		Attempted copulation	0	0	600
TrpB3_L6	20_DIPTheta_ uas_stop_TrpA1_ FruFLP1_male alone		Attempted copulation	0	0	599.663
TrpB3_G3	20_DIPTheta_ uas_stop_TrpA1_ FruFLP10_male alone	Jerky movements	Attempted copulation	0	0	600
TrpB3_K8	20_DIPTheta_ uas_stop_TrpA1_ FruFLP2_male alone		Attempted copulation	0	0	600
TrpB3_G1	20_DIPTheta_ uas_stop_TrpA1_ FruFLP3_male alone	beginning spins in circles	Attempted copulation	0	0	600
TrpB3_E8	20_DIPTheta_ uas_stop_TrpA1_ FruFLP4_male alone		Attempted copulation	0	0	600
TrpB3_F2	20_DIPTheta_ uas_stop_TrpA1_ FruFLP5_male alone		Attempted copulation	0	0	599.463
TrpB3_M6	20_DIPTheta_ uas_stop_TrpA1_ FruFLP6_male alone		Attempted copulation	0	0	600
TrpB3_B5	20_DIPTheta_ uas_stop_TrpA1_ FruFLP7_male alone	Can't tell if wings stuck out or dbl wing ext. Clear proboscis extension happens ~507 but also before	Attempted copulation	0	0	600
TrpB3_F9	20_DIPTheta_ uas_stop_TrpA1_ FruFLP8_male alone		Attempted copulation	0	0	600
TrpB3_F4	20_DIPTheta_ uas_stop_TrpA1_ FruFLP9_male alone		Attempted copulation	0	0	600
TrpB3_M3	20_DIPzeta_ uas_stop_TrpA1_ FruFLP1_male alone		Attempted copulation	0	0	600
TrpB3_E5	20_DIPzeta_ uas_stop_TrpA1_ FruFLP10_male alone		Attempted copulation	0	0	600
TrpB3_B4	20_DIPzeta_ uas_stop_TrpA1_ FruFLP2_male alone		Attempted copulation	0	0	600
TrpB3_J5	20_DIPzeta_ uas_stop_TrpA1_ FruFLP3_male alone		Attempted copulation	0	0	600
TrpB3_A1	20_DIPzeta_ uas_stop_TrpA1_ FruFLP4_male alone	Abdomen bobbing starting ~80	Attempted copulation	0	0	600
TrpB3_E2	20_DIPzeta_ uas_stop_TrpA1_ FruFLP5_male alone		Attempted copulation	0	0	600
TrpB3_G8	20_DIPzeta_ uas_stop_TrpA1_ FruFLP6_male alone		Attempted copulation	0	0	600
TrpB3_D7	20_DIPzeta_ uas_stop_TrpA1_ FruFLP7_male alone		Attempted copulation	0	0	600
TrpB3_J6	20_DIPzeta_ uas_stop_TrpA1_ FruFLP8_male alone		Attempted copulation	0	0	600
TrpB3_A3	20_DIPzeta_ uas_stop_TrpA1_ FruFLP9_male alone	Short* bouts of loss of righting. Ex. ~185	Attempted copulation	0	0	600
TrpB4_G9	20_dpr1_ uas_stop_TrpA1_ FruFLP1_male alone		Attempted copulation	0	0	600
TrpB4_C3	20_dpr1_ uas_stop_TrpA1_ FruFLP10_male alone		Attempted copulation	0	0	600
TrpB4_F1	20_dpr1_ uas_stop_TrpA1_ FruFLP2_male alone	abdomen bobbing ~400	Attempted copulation	0	0	600
TrpB4_K2	20_dpr1_ uas_stop_TrpA1_ FruFLP3_male alone		Attempted copulation	0	0	600
TrpB4_J7	20_dpr1_ uas_stop_TrpA1_ FruFLP4_male alone		Attempted copulation	0	0	600
TrpB4_C4	20_dpr1_ uas_stop_TrpA1_ FruFLP5_male alone	Lots of head rubbing	Attempted copulation	0	0	600
TrpB4_C7	20_dpr1_ uas_stop_TrpA1_ FruFLP6_male alone	lots of head and probocsis rubbing	Attempted copulation	0	0	600
TrpB4_B7	20_dpr1_ uas_stop_TrpA1_ FruFLP7_male alone		Attempted copulation	0	0	600
TrpB4_E5	20_dpr1_ uas_stop_TrpA1_ FruFLP8_male alone		Attempted copulation	0	0	600
TrpB4_H2	20_dpr1_ uas_stop_TrpA1_ FruFLP9_male alone		Attempted copulation	0	0	600
TrpB1_C2	20_dpr10_gal4, uas_stop_Trpa1, FruFLP_male alone 1		Attempted copulation	0	0	600
TrpB1_A8	20_dpr10_gal4, uas_stop_Trpa1, FruFLP_male alone 10		Attempted copulation	0	0	600
TrpB1_E1	20_dpr10_gal4, uas_stop_Trpa1, FruFLP_male alone 2		Attempted copulation	0	0	600
TrpB1_J4	20_dpr10_gal4, uas_stop_Trpa1, FruFLP_male alone 3		Attempted copulation	0	0	600
TrpB1_F1	20_dpr10_gal4, uas_stop_Trpa1, FruFLP_male alone 4		Attempted copulation	0	0	600
TrpB1_D3	20_dpr10_gal4, uas_stop_Trpa1, FruFLP_male alone 5		Attempted copulation	0	0	600
TrpB1_H5	20_dpr10_gal4, uas_stop_Trpa1, FruFLP_male alone 6		Attempted copulation	0	0	600
TrpB1_D2	20_dpr10_gal4, uas_stop_Trpa1, FruFLP_male alone 7		Attempted copulation	0	0	600
TrpB1_C1	20_dpr10_gal4, uas_stop_Trpa1, FruFLP_male alone 8		Attempted copulation	0	0	600
TrpB1_E5	20_dpr10_gal4, uas_stop_Trpa1, FruFLP_male alone 9		Attempted copulation	0	0	600
TrpB1_M2	20_dpr11_gal4, uas_stop_Trpa1, FruFL6P_male alone		Attempted copulation	0	0	600
TrpB1_C3	20_dpr11_gal4, uas_stop_Trpa1, FruFLP1_male alone		Attempted copulation	0	0	600
TrpB1_H4	20_dpr11_gal4, uas_stop_Trpa1, FruFLP10_male alone		Attempted copulation	0	0	600
TrpB1_G3	20_dpr11_gal4, uas_stop_Trpa1, FruFLP2_male alone	Falls down a lot. Short bursts of loss of righting	Attempted copulation	0	0	600
TrpB1_A3	20_dpr11_gal4, uas_stop_Trpa1, FruFLP3_male alone		Attempted copulation	0	0	600
TrpB1_A9	20_dpr11_gal4, uas_stop_Trpa1, FruFLP4_male alone		Attempted copulation	0	0	600
TrpB1_L7	20_dpr11_gal4, uas_stop_Trpa1, FruFLP5_male alone		Attempted copulation	0	0	600
TrpB1_H2	20_dpr11_gal4, uas_stop_Trpa1, FruFLP7_male alone		Attempted copulation	0	0	600
TrpB1_D8	20_dpr11_gal4, uas_stop_Trpa1, FruFLP8_male alone		Attempted copulation	0	0	600
TrpB1_L4	20_dpr11_gal4, uas_stop_Trpa1, FruFLP9_male alone		Attempted copulation	0	0	600
TrpB3_G4	20_dpr12_ uas_stop_TrpA1_ FruFLP1_male alone		Attempted copulation	0	0	600
TrpB4_L3	20_dpr12_ uas_stop_TrpA1_ FruFLP10_male alone		Attempted copulation	0	0	600
TrpB3_J4	20_dpr12_ uas_stop_TrpA1_ FruFLP2_male alone		Attempted copulation	0	0	600
TrpB3_C4	20_dpr12_ uas_stop_TrpA1_ FruFLP3_male alone		Attempted copulation	0	0	600
TrpB3_C2	20_dpr12_ uas_stop_TrpA1_ FruFLP4_male alone		Attempted copulation	0	0	600
TrpB3_J7	20_dpr12_ uas_stop_TrpA1_ FruFLP5_male alone		Attempted copulation	0	0	600
TrpB4_C6	20_dpr12_ uas_stop_TrpA1_ FruFLP6_male alone		Attempted copulation	0	0	600
TrpB4_A3	20_dpr12_ uas_stop_TrpA1_ FruFLP7_male alone		Attempted copulation	0	0	600
TrpB4_F7	20_dpr12_ uas_stop_TrpA1_ FruFLP8_male alone		Attempted copulation	0	0	600
TrpB4_G1	20_dpr12_ uas_stop_TrpA1_ FruFLP9_male alone		Attempted copulation	0	0	600
TrpB5_H5	20_dpr14_ uas_stop_TrpA1_ FruFLP1_male alone		Attempted copulation	0	0	600
TrpB5_G7	20_dpr14_ uas_stop_TrpA1_ FruFLP10_male alone		Attempted copulation	0	0	600
TrpB5_L6	20_dpr14_ uas_stop_TrpA1_ FruFLP2_male alone		Attempted copulation	0	0	600
TrpB5_E7	20_dpr14_ uas_stop_TrpA1_ FruFLP3_male alone		Attempted copulation	0	0	600
TrpB5_B7	20_dpr14_ uas_stop_TrpA1_ FruFLP4_male alone		Attempted copulation	0	0	600
TrpB5_L9	20_dpr14_ uas_stop_TrpA1_ FruFLP5_male alone		Attempted copulation	0	0	600
TrpB5_C3	20_dpr14_ uas_stop_TrpA1_ FruFLP6_male alone		Attempted copulation	0	0	600
TrpB5_F6	20_dpr14_ uas_stop_TrpA1_ FruFLP7_male alone		Attempted copulation	0	0	600
TrpB5_L2	20_dpr14_ uas_stop_TrpA1_ FruFLP8_male alone		Attempted copulation	0	0	600
TrpB5_N7	20_dpr14_ uas_stop_TrpA1_ FruFLP9_male alone		Attempted copulation	0	0	600
TrpB3_D8	20_dpr15_ uas_stop_TrpA1_ FruFLP1_male alone	abdomen bobbing	Attempted copulation	0	0	600
TrpB3_C8	20_dpr15_ uas_stop_TrpA1_ FruFLP10_male alone	Lots of head rubbing	Attempted copulation	0	0	600
TrpB3_H8	20_dpr15_ uas_stop_TrpA1_ FruFLP2_male alone		Attempted copulation	0	0	600
TrpB3_B1	20_dpr15_ uas_stop_TrpA1_ FruFLP3_male alone		Attempted copulation	0	0	600
TrpB3_A8	20_dpr15_ uas_stop_TrpA1_ FruFLP4_male alone		Attempted copulation	0	0	600
TrpB3_J3	20_dpr15_ uas_stop_TrpA1_ FruFLP5_male alone		Attempted copulation	0	0	600
TrpB3_H6	20_dpr15_ uas_stop_TrpA1_ FruFLP6_male alone		Attempted copulation	0	0	600
TrpB3_L4	20_dpr15_ uas_stop_TrpA1_ FruFLP7_male alone		Attempted copulation	0	0	600
TrpB3_B7	20_dpr15_ uas_stop_TrpA1_ FruFLP8_male alone		Attempted copulation	0	0	600
TrpB3_F5	20_dpr15_ uas_stop_TrpA1_ FruFLP9_male alone		Attempted copulation	0	0	600
TrpB3_C6	20_dpr16_ uas_stop_TrpA1_ FruFLP1_male alone	abdomen bobbing ~250	Attempted copulation	0	0	600
TrpB3_F8	20_dpr16_ uas_stop_TrpA1_ FruFLP10_male alone	abdomen bobbing starting ~200	Attempted copulation	0	0	600
TrpB3_M4	20_dpr16_ uas_stop_TrpA1_ FruFLP2_male alone		Attempted copulation	0	0	600
TrpB3_H3	20_dpr16_ uas_stop_TrpA1_ FruFLP3_male alone		Attempted copulation	0	0	600
TrpB3_K3	20_dpr16_ uas_stop_TrpA1_ FruFLP4_male alone	Lots of head rubbing	Attempted copulation	0	0	600
TrpB3_H7	20_dpr16_ uas_stop_TrpA1_ FruFLP5_male alone		Attempted copulation	0	0	600
TrpB3_B9	20_dpr16_ uas_stop_TrpA1_ FruFLP6_male alone	Proboscis ext. Rubs head constantly	Attempted copulation	0	0	600
TrpB3_K9	20_dpr16_ uas_stop_TrpA1_ FruFLP7_male alone		Attempted copulation	0	0	600
TrpB3_D4	20_dpr16_ uas_stop_TrpA1_ FruFLP8_male alone		Attempted copulation	0	0	600
TrpB3_L9	20_dpr16_ uas_stop_TrpA1_ FruFLP9_male alone		Attempted copulation	0	0	600
TrpB1_H3	20_dpr17_gal4, uas_stop_Trpa1, FruFLP1_male alone		Attempted copulation	0	0	600
TrpB1_K2	20_dpr17_gal4, uas_stop_Trpa1, FruFLP10_male alone		Attempted copulation	0	0	600
TrpB1_L9	20_dpr17_gal4, uas_stop_Trpa1, FruFLP2_male alone	Backwards walking. Abdomen bobbing.	Attempted copulation	0	0	600
TrpB1_J7	20_dpr17_gal4, uas_stop_Trpa1, FruFLP3_male alone		Attempted copulation	0	0	600
TrpB1_D9	20_dpr17_gal4, uas_stop_Trpa1, FruFLP4_male alone		Attempted copulation	0	0	600
TrpB1_B6	20_dpr17_gal4, uas_stop_Trpa1, FruFLP5_male alone		Attempted copulation	0	0	600
TrpB1_J1	20_dpr17_gal4, uas_stop_Trpa1, FruFLP6_male alone		Attempted copulation	0	0	600
TrpB1_C4	20_dpr17_gal4, uas_stop_Trpa1, FruFLP7_male alone		Attempted copulation	0	0	600
TrpB1_A6	20_dpr17_gal4, uas_stop_Trpa1, FruFLP8_male alone		Attempted copulation	0	0	600
TrpB1_K5	20_dpr17_gal4, uas_stop_Trpa1, FruFLP9_male alone		Attempted copulation	0	0	600
TrpB4_E8	20_dpr18_ uas_stop_TrpA1_ FruFLP1_male alone	lots of proboscis/head rubbing. Probsocis ext.	Attempted copulation	0	0	600
TrpB4_G8	20_dpr18_ uas_stop_TrpA1_ FruFLP10_male alone		Attempted copulation	0	0	600
TrpB4_K7	20_dpr18_ uas_stop_TrpA1_ FruFLP2_male alone		Attempted copulation	0	0	600
TrpB4_A4	20_dpr18_ uas_stop_TrpA1_ FruFLP3_male alone		Attempted copulation	0	0	600
TrpB4_H4	20_dpr18_ uas_stop_TrpA1_ FruFLP4_male alone		Attempted copulation	0	0	600
TrpB4_G3	20_dpr18_ uas_stop_TrpA1_ FruFLP5_male alone		Attempted copulation	0	0	600
TrpB4_D1	20_dpr18_ uas_stop_TrpA1_ FruFLP6_male alone		Attempted copulation	0	0	600
TrpB4_D7	20_dpr18_ uas_stop_TrpA1_ FruFLP7_male alone		Attempted copulation	0	0	600
TrpB4_A1	20_dpr18_ uas_stop_TrpA1_ FruFLP8_male alone		Attempted copulation	0	0	600
TrpB4_C2	20_dpr18_ uas_stop_TrpA1_ FruFLP9_male alone		Attempted copulation	0	0	600
TrpB1_K7	20_dpr2_gal4, uas_stop_Trpa1, FruFLP1_male alone		Attempted copulation	0	0	600
TrpB1_G5	20_dpr2_gal4, uas_stop_Trpa1, FruFLP10_male alone		Attempted copulation	0	0	600
TrpB1_D7	20_dpr2_gal4, uas_stop_Trpa1, FruFLP2_male alone		Attempted copulation	0	0	600
TrpB1_C5	20_dpr2_gal4, uas_stop_Trpa1, FruFLP3_male alone		Attempted copulation	0	0	600
TrpB1_M6	20_dpr2_gal4, uas_stop_Trpa1, FruFLP4_male alone		Attempted copulation	0	0	600
TrpB1_C7	20_dpr2_gal4, uas_stop_Trpa1, FruFLP5_male alone		Attempted copulation	0	0	600
TrpB1_L1	20_dpr2_gal4, uas_stop_Trpa1, FruFLP6_male alone		Attempted copulation	0	0	600
TrpB1_J3	20_dpr2_gal4, uas_stop_Trpa1, FruFLP7_male alone		Attempted copulation	0	0	600
TrpB1_J5	20_dpr2_gal4, uas_stop_Trpa1, FruFLP8_male alone		Attempted copulation	0	0	600
TrpB1_K6	20_dpr2_gal4, uas_stop_Trpa1, FruFLP9_male alone		Attempted copulation	0	0	600
TrpB2_D9	20_dpr3_ uas_stop_TrpA1_ FruFLP1_male alone	Abdomen bobbing ~200	Attempted copulation	0	0	600
TrpB2_G5	20_dpr3_ uas_stop_TrpA1_ FruFLP10_male alone		Attempted copulation	0	0	600
TrpB2_M4	20_dpr3_ uas_stop_TrpA1_ FruFLP2_male alone		Attempted copulation	0	0	600
TrpB2_G9	20_dpr3_ uas_stop_TrpA1_ FruFLP3_male alone		Attempted copulation	0	0	600
TrpB2_J9	20_dpr3_ uas_stop_TrpA1_ FruFLP4_male alone		Attempted copulation	0	0	600
TrpB2_J3	20_dpr3_ uas_stop_TrpA1_ FruFLP5_male alone		Attempted copulation	0	0	600
TrpB2_L2	20_dpr3_ uas_stop_TrpA1_ FruFLP6_male alone		Attempted copulation	0	0	600
TrpB2_J4	20_dpr3_ uas_stop_TrpA1_ FruFLP7_male alone		Attempted copulation	0	0	600
TrpB2_C2	20_dpr3_ uas_stop_TrpA1_ FruFLP8_male alone		Attempted copulation	0	0	600
TrpB2_F7	20_dpr3_ uas_stop_TrpA1_ FruFLP9_male alone		Attempted copulation	0	0	600
TrpB5_B5	20_dpr4_ uas_stop_TrpA1_ FruFLP1_male alone	Jerky movements, falling, loss of righting, proboscis extension	Attempted copulation	0	0	600
TrpB5_H4	20_dpr4_ uas_stop_TrpA1_ FruFLP10_male alone		Attempted copulation	0	0	600
TrpB5_N5	20_dpr4_ uas_stop_TrpA1_ FruFLP2_male alone		Attempted copulation	0	0	600
TrpB5_G2	20_dpr4_ uas_stop_TrpA1_ FruFLP3_male alone		Attempted copulation	0	0	600
TrpB5_A4	20_dpr4_ uas_stop_TrpA1_ FruFLP4_male alone		Attempted copulation	0	0	600
TrpB5_B9	20_dpr4_ uas_stop_TrpA1_ FruFLP5_male alone		Attempted copulation	0	0	600
TrpB5_L7	20_dpr4_ uas_stop_TrpA1_ FruFLP6_male alone		Attempted copulation	0	0	600
TrpB5_B3	20_dpr4_ uas_stop_TrpA1_ FruFLP7_male alone		Attempted copulation	0	0	600
TrpB5_G5	20_dpr4_ uas_stop_TrpA1_ FruFLP8_male alone		Attempted copulation	0	0	600
TrpB5_J3	20_dpr4_ uas_stop_TrpA1_ FruFLP9_male alone		Attempted copulation	0	0	600
TrpB4_J4	20_dpr5_ uas_stop_TrpA1_ FruFLP1_male alone	abdomen bobbing	Attempted copulation	0	0	600
TrpB4_B3	20_dpr5_ uas_stop_TrpA1_ FruFLP10_male alone		Attempted copulation	0	0	600
TrpB4_K9	20_dpr5_ uas_stop_TrpA1_ FruFLP2_male alone		Attempted copulation	0	0	600
TrpB4_J3	20_dpr5_ uas_stop_TrpA1_ FruFLP3_male alone		Attempted copulation	0	0	600
TrpB4_F4	20_dpr5_ uas_stop_TrpA1_ FruFLP4_male alone		Attempted copulation	0	0	600
TrpB4_A2	20_dpr5_ uas_stop_TrpA1_ FruFLP5_male alone		Attempted copulation	0	0	600
TrpB4_A6	20_dpr5_ uas_stop_TrpA1_ FruFLP6_male alone	abdomen bobbing	Attempted copulation	0	0	600
TrpB4_E3	20_dpr5_ uas_stop_TrpA1_ FruFLP7_male alone		Attempted copulation	0	0	600
TrpB4_B8	20_dpr5_ uas_stop_TrpA1_ FruFLP8_male alone		Attempted copulation	0	0	600
TrpB4_B9	20_dpr5_ uas_stop_TrpA1_ FruFLP9_male alone		Attempted copulation	0	0	600
TrpB5_H7	20_dpr6_ uas_stop_TrpA1_ FruFLP1_male alone		Attempted copulation	0	0	600
TrpB5_D7	20_dpr6_ uas_stop_TrpA1_ FruFLP10_male alone	lots of head rubbing	Attempted copulation	0	0	600
TrpB5_K3	20_dpr6_ uas_stop_TrpA1_ FruFLP2_male alone		Attempted copulation	0	0	600
TrpB5_J1	20_dpr6_ uas_stop_TrpA1_ FruFLP3_male alone		Attempted copulation	0	0	600
TrpB5_F9	20_dpr6_ uas_stop_TrpA1_ FruFLP4_male alone		Attempted copulation	0	0	600
TrpB5_N4	20_dpr6_ uas_stop_TrpA1_ FruFLP5_male alone	lots of head rubbing	Attempted copulation	0	0	600
TrpB5_L8	20_dpr6_ uas_stop_TrpA1_ FruFLP6_male alone		Attempted copulation	0	0	600
TrpB5_K7	20_dpr6_ uas_stop_TrpA1_ FruFLP7_male alone		Attempted copulation	0	0	600
TrpB5_D6	20_dpr6_ uas_stop_TrpA1_ FruFLP8_male alone		Attempted copulation	0	0	600
TrpB5_G8	20_dpr6_ uas_stop_TrpA1_ FruFLP9_male alone	short bursts of loss of righting	Attempted copulation	0	0	600
TrpB4_C9	20_dpr8_ uas_stop_TrpA1_ FruFLP1_male alone	abdomen bobbing	Attempted copulation	0	0	600
TrpB4_K5	20_dpr8_ uas_stop_TrpA1_ FruFLP10_male alone		Attempted copulation	0	0	600
TrpB4_F9	20_dpr8_ uas_stop_TrpA1_ FruFLP2_male alone	abdomen bobbing, probsicis ext. ~415	Attempted copulation	0	0	600
TrpB4_B4	20_dpr8_ uas_stop_TrpA1_ FruFLP3_male alone		Attempted copulation	0	0	600
TrpB4_H5	20_dpr8_ uas_stop_TrpA1_ FruFLP4_male alone	abdomen bobbing	Attempted copulation	0	0	600
TrpB4_E2	20_dpr8_ uas_stop_TrpA1_ FruFLP5_male alone		Attempted copulation	0	0	600
TrpB4_J1	20_dpr8_ uas_stop_TrpA1_ FruFLP6_male alone		Attempted copulation	0	0	600
TrpB4_D6	20_dpr8_ uas_stop_TrpA1_ FruFLP7_male alone		Attempted copulation	0	0	600
TrpB4_J9	20_dpr8_ uas_stop_TrpA1_ FruFLP8_male alone		Attempted copulation	0	0	600
TrpB4_L2	20_dpr8_ uas_stop_TrpA1_ FruFLP9_male alone		Attempted copulation	0	0	600
TrpB4_E9	20_dpr9_gal4, uas_stop_Trpa1, FruFLP_male alone 1	Lots of head rubbing	Attempted copulation	0	0	600
TrpB4_B2	20_dpr9_gal4, uas_stop_Trpa1, FruFLP_male alone 10		Attempted copulation	0	0	600
TrpB4_L7	20_dpr9_gal4, uas_stop_Trpa1, FruFLP_male alone 13		Attempted copulation	0	0	600
TrpB4_H8	20_dpr9_gal4, uas_stop_Trpa1, FruFLP_male alone 2		Attempted copulation	0	0	600
TrpB4_A7	20_dpr9_gal4, uas_stop_Trpa1, FruFLP_male alone 3		Attempted copulation	0	0	600
TrpB4_G4	20_dpr9_gal4, uas_stop_Trpa1, FruFLP_male alone 4		Attempted copulation	0	0	600
TrpB4_M5	20_dpr9_gal4, uas_stop_Trpa1, FruFLP_male alone 5		Attempted copulation	0	0	600
TrpB4_D8	20_dpr9_gal4, uas_stop_Trpa1, FruFLP_male alone 6		Attempted copulation	0	0	600
TrpB4_H1	20_dpr9_gal4, uas_stop_Trpa1, FruFLP_male alone 7		Attempted copulation	0	0	600
TrpB4_M1	20_dpr9_gal4, uas_stop_Trpa1, FruFLP_male alone 8		Attempted copulation	0	0	600
TrpB5_H1	20_FruFLP1_male alone		Attempted copulation	0	0	600
TrpB5_C2	20_FruFLP10_male alone		Attempted copulation	0	0	600
TrpB5_M3	20_FruFLP2_male alone		Attempted copulation	0	0	600
TrpB5_E2	20_FruFLP3_male alone		Attempted copulation	0	0	600
TrpB5_F8	20_FruFLP4_male alone		Attempted copulation	0	0	600
TrpB5_H6	20_FruFLP5_male alone		Attempted copulation	0	0	600
TrpB5_D9	20_FruFLP6_male alone		Attempted copulation	0	0	600
TrpB5_E6	20_FruFLP7_male alone		Attempted copulation	0	0	600
TrpB5_H2	20_FruFLP8_male alone		Attempted copulation	0	0	600
TrpB5_N3	20_FruFLP9_male alone		Attempted copulation	0	0	600
TrpB5_J7	20_TrpA1_1_male alone		Attempted copulation	0	0	600
TrpB5_E9	20_TrpA1_10_male alone		Attempted copulation	0	0	600
TrpB5_N1	20_TrpA1_2_male alone		Attempted copulation	0	0	600
TrpB5_O1	20_TrpA1_3_male alone		Attempted copulation	0	0	600
TrpB5_F5	20_TrpA1_4_male alone	funny wings-- they look spread but not vibrating	Attempted copulation	0	0	600
TrpB5_O3	20_TrpA1_5_male alone		Attempted copulation	0	0	600
TrpB5_N9	20_TrpA1_6_male alone		Attempted copulation	0	0	600
TrpB5_C9	20_TrpA1_7_male alone		Attempted copulation	0	0	600
TrpB5_M1	20_TrpA1_8_male alone		Attempted copulation	0	0	600
TrpB5_H3	20_TrpA1_9_male alone	jerky walking-- loss of righting	Attempted copulation	0	0	600
TrpB5_H8	30_CS1_male alone		Attempted copulation	0	0	600
TrpB5_J5	30_CS10_male alone		Attempted copulation	0	0	600
TrpB5_B2	30_CS2_male alone		Attempted copulation	0	0	600
TrpB5_M2	30_CS3_male alone		Attempted copulation	0	0	600
TrpB5_K6	30_CS4_male alone		Attempted copulation	0	0	600
TrpB5_G9	30_CS5_male alone		Attempted copulation	0	0	600
TrpB5_D1	30_CS6_male alone		Attempted copulation	0	0	600
TrpB5_D3	30_CS7_male alone		Attempted copulation	0	0	600
TrpB5_D5	30_CS8_male alone		Attempted copulation	0	0	600
TrpB5_B1	30_CS9_male alone		Attempted copulation	0	0	600
TrpB2_K4	30_DIPalpha_ uas_stop_TrpA1_ FruFLP1_male alone		Attempted copulation	0	0	600
TrpB2_J2	30_DIPalpha_ uas_stop_TrpA1_ FruFLP10_male alone		Attempted copulation	0	0	600
TrpB2_C4	30_DIPalpha_ uas_stop_TrpA1_ FruFLP2_male alone		Attempted copulation	0	0	600
TrpB2_J6	30_DIPalpha_ uas_stop_TrpA1_ FruFLP3_male alone		Attempted copulation	0	0	600
TrpB2_C8	30_DIPalpha_ uas_stop_TrpA1_ FruFLP4_male alone		Attempted copulation	0	0	600
TrpB2_D1	30_DIPalpha_ uas_stop_TrpA1_ FruFLP5_male alone		Attempted copulation	0	0	600
TrpB2_F9	30_DIPalpha_ uas_stop_TrpA1_ FruFLP6_male alone		Attempted copulation	0	0	600
TrpB2_B8	30_DIPalpha_ uas_stop_TrpA1_ FruFLP7_male alone	Very jerky. Leg extension?	Attempted copulation	0	0	600
TrpB2_K1	30_DIPalpha_ uas_stop_TrpA1_ FruFLP8_male alone	Jerky/funny leg movements	Attempted copulation	0	0	600
TrpB2_L3	30_DIPalpha_ uas_stop_TrpA1_ FruFLP9_male alone		Attempted copulation	0	0	600
TrpB1_G1	30_DIPbeta_gal4, uas_stop_Trpa1, FruFLP1_male alone		Attempted copulation	0	0	600
TrpB1_B8	30_DIPbeta_gal4, uas_stop_Trpa1, FruFLP10_male alone		Attempted copulation	0	0	600
TrpB1_H6	30_DIPbeta_gal4, uas_stop_Trpa1, FruFLP2_male alone		Attempted copulation	0	0	600
TrpB1_J6	30_DIPbeta_gal4, uas_stop_Trpa1, FruFLP3_male alone		Attempted copulation	0	0	600
TrpB1_B1	30_DIPbeta_gal4, uas_stop_Trpa1, FruFLP4_male alone		Attempted copulation	0	0	600
TrpB1_G9	30_DIPbeta_gal4, uas_stop_Trpa1, FruFLP5_male alone		Attempted copulation	0	0	600
TrpB1_A1	30_DIPbeta_gal4, uas_stop_Trpa1, FruFLP6_male alone		Attempted copulation	0	0	600
TrpB1_D5	30_DIPbeta_gal4, uas_stop_Trpa1, FruFLP7_male alone		Attempted copulation	0	0	600
TrpB1_G8	30_DIPbeta_gal4, uas_stop_Trpa1, FruFLP8_male alone		Attempted copulation	0	0	600
TrpB1_B3	30_DIPbeta_gal4, uas_stop_Trpa1, FruFLP9_male alone		Attempted copulation	0	0	600
TrpB3_L5	30_DIPdelta_ uas_stop_TrpA1_ FruFLP1_male alone	Jerky walking ~200	Attempted copulation	0	0	600
TrpB3_K1	30_DIPdelta_ uas_stop_TrpA1_ FruFLP10_male alone	abdomen bobbing	Attempted copulation	0	0	600
TrpB3_E7	30_DIPdelta_ uas_stop_TrpA1_ FruFLP2_male alone		Attempted copulation	0	0	600
TrpB3_H9	30_DIPdelta_ uas_stop_TrpA1_ FruFLP3_male alone		Attempted copulation	0	0	600
TrpB3_F3	30_DIPdelta_ uas_stop_TrpA1_ FruFLP4_male alone		Attempted copulation	0	0	600
TrpB3_J9	30_DIPdelta_ uas_stop_TrpA1_ FruFLP5_male alone		Attempted copulation	0	0	600
TrpB3_J2	30_DIPdelta_ uas_stop_TrpA1_ FruFLP6_male alone		Attempted copulation	0	0	600
TrpB3_E9	30_DIPdelta_ uas_stop_TrpA1_ FruFLP7_male alone		Attempted copulation	0	0	600
TrpB3_F7	30_DIPdelta_ uas_stop_TrpA1_ FruFLP8_male alone		Attempted copulation	0	0	600
TrpB3_D1	30_DIPdelta_ uas_stop_TrpA1_ FruFLP9_male alone		Attempted copulation	0	0	600
TrpB2_M1	30_DIPepsilon_ uas_stop_TrpA1_ FruFLP1_male alone		Attempted copulation	0	0	600
TrpB2_G6	30_DIPepsilon_ uas_stop_TrpA1_ FruFLP10_male alone		Attempted copulation	0	0	600
TrpB2_J5	30_DIPepsilon_ uas_stop_TrpA1_ FruFLP2_male alone		Attempted copulation	0	0	600
TrpB2_H4	30_DIPepsilon_ uas_stop_TrpA1_ FruFLP3_male alone		Attempted copulation	0	0	600
TrpB2_M3	30_DIPepsilon_ uas_stop_TrpA1_ FruFLP4_male alone		Attempted copulation	0	0	600
TrpB2_H7	30_DIPepsilon_ uas_stop_TrpA1_ FruFLP5_male alone		Attempted copulation	0	0	600
TrpB2_L4	30_DIPepsilon_ uas_stop_TrpA1_ FruFLP6_male alone		Attempted copulation	0	0	600
TrpB2_B4	30_DIPepsilon_ uas_stop_TrpA1_ FruFLP7_male alone		Attempted copulation	0	0	600
TrpB2_C3	30_DIPepsilon_ uas_stop_TrpA1_ FruFLP8_male alone		Attempted copulation	0	0	600
TrpB2_E9	30_DIPepsilon_ uas_stop_TrpA1_ FruFLP9_male alone		Attempted copulation	0	0	600
TrpB2_B9	30_DIPeta_ uas_stop_TrpA1_ FruFLP1_male alone		Attempted copulation	0	0	600
TrpB2_D7	30_DIPeta_ uas_stop_TrpA1_ FruFLP10_male alone		Attempted copulation	0	0	600
TrpB2_B7	30_DIPeta_ uas_stop_TrpA1_ FruFLP2_male alone		Attempted copulation	0	0	600
TrpB2_G8	30_DIPeta_ uas_stop_TrpA1_ FruFLP3_male alone		Attempted copulation	0	0	600
TrpB2_A3	30_DIPeta_ uas_stop_TrpA1_ FruFLP4_male alone		Attempted copulation	0	0	591.065
TrpB2_G1	30_DIPeta_ uas_stop_TrpA1_ FruFLP5_male alone		Attempted copulation	0	0	600
TrpB2_M6	30_DIPeta_ uas_stop_TrpA1_ FruFLP6_male alone		Attempted copulation	0	0	600
TrpB2_A9	30_DIPeta_ uas_stop_TrpA1_ FruFLP7_male alone		Attempted copulation	0	0	600
TrpB2_M2	30_DIPeta_ uas_stop_TrpA1_ FruFLP8_male alone		Attempted copulation	0	0	600
TrpB2_G4	30_DIPeta_ uas_stop_TrpA1_ FruFLP9_male alone		Attempted copulation	0	0	600
TrpB2_A1	30_DIPgamma_ uas_stop_TrpA1_ FruFLP1_male alone		Attempted copulation	0	0	600
TrpB2_E7	30_DIPgamma_ uas_stop_TrpA1_ FruFLP10_male alone		Attempted copulation	0	0	600
TrpB2_H1	30_DIPgamma_ uas_stop_TrpA1_ FruFLP2_male alone		Attempted copulation	0	0	600
TrpB2_H2	30_DIPgamma_ uas_stop_TrpA1_ FruFLP3_male alone		Attempted copulation	0	0	600
TrpB2_F3	30_DIPgamma_ uas_stop_TrpA1_ FruFLP4_male alone		Attempted copulation	0	0	600
TrpB2_H5	30_DIPgamma_ uas_stop_TrpA1_ FruFLP5_male alone		Attempted copulation	0	0	600
TrpB2_L6	30_DIPgamma_ uas_stop_TrpA1_ FruFLP6_male alone	Abdomen bobbing- spins in circles occasionally. In beginning and ~270	Attempted copulation	0	0	600
TrpB2_E2	30_DIPgamma_ uas_stop_TrpA1_ FruFLP7_male alone		Attempted copulation	0	0	600
TrpB2_K3	30_DIPgamma_ uas_stop_TrpA1_ FruFLP8_male alone		Attempted copulation	0	0	600
TrpB2_L5	30_DIPgamma_ uas_stop_TrpA1_ FruFLP9_male alone		Attempted copulation	0	0	600
TrpB3_A2	30_DIPtheta_ uas_stop_TrpA1_ FruFLP1_male alone		Attempted copulation	0	0	600
TrpB3_L7	30_DIPtheta_ uas_stop_TrpA1_ FruFLP10_male alone		Attempted copulation	0	0	600
TrpB3_E4	30_DIPtheta_ uas_stop_TrpA1_ FruFLP2_male alone	ejaculation around 50?	Attempted copulation	0	0	600
TrpB3_A6	30_DIPtheta_ uas_stop_TrpA1_ FruFLP3_male alone		Attempted copulation	0	0	600
TrpB3_M2	30_DIPtheta_ uas_stop_TrpA1_ FruFLP4_male alone		Attempted copulation	0	0	600
TrpB3_F1	30_DIPtheta_ uas_stop_TrpA1_ FruFLP5_male alone		Attempted copulation	0	0	600
TrpB3_A7	30_DIPtheta_ uas_stop_TrpA1_ FruFLP6_male alone	Wing flutter ~150	Attempted copulation	0	0	600
TrpB3_B6	30_DIPtheta_ uas_stop_TrpA1_ FruFLP7_male alone		Attempted copulation	0	0	600
TrpB3_E6	30_DIPtheta_ uas_stop_TrpA1_ FruFLP8_male alone		Attempted copulation	0	0	600
TrpB3_M1	30_DIPtheta_ uas_stop_TrpA1_ FruFLP9_male alone		Attempted copulation	0	0	600
TrpB3_L8	30_DIPzeta_ uas_stop_TrpA1_ FruFLP1_male alone		Attempted copulation	0	0	600
TrpB3_C7	30_DIPzeta_ uas_stop_TrpA1_ FruFLP10_male alone		Attempted copulation	0	0	600
TrpB3_L2	30_DIPzeta_ uas_stop_TrpA1_ FruFLP2_male alone		Attempted copulation	0	0	600
TrpB3_D3	30_DIPzeta_ uas_stop_TrpA1_ FruFLP3_male alone		Attempted copulation	0	0	600
TrpB3_H4	30_DIPzeta_ uas_stop_TrpA1_ FruFLP4_male alone		Attempted copulation	0	0	600
TrpB3_C3	30_DIPzeta_ uas_stop_TrpA1_ FruFLP5_male alone		Attempted copulation	0	0	600
TrpB3_C1	30_DIPzeta_ uas_stop_TrpA1_ FruFLP6_male alone		Attempted copulation	0	0	600
TrpB3_B2	30_DIPzeta_ uas_stop_TrpA1_ FruFLP7_male alone		Attempted copulation	0	0	600
TrpB3_D5	30_DIPzeta_ uas_stop_TrpA1_ FruFLP8_male alone		Attempted copulation	0	0	600
TrpB3_D9	30_DIPzeta_ uas_stop_TrpA1_ FruFLP9_male alone		Attempted copulation	0	0	600
TrpB4_G6	30_dpr1_ uas_stop_TrpA1_ FruFLP1_male alone		Attempted copulation	0	0	600
TrpB4_H7	30_dpr1_ uas_stop_TrpA1_ FruFLP10_male alone		Attempted copulation	0	0	600
TrpB4_B6	30_dpr1_ uas_stop_TrpA1_ FruFLP2_male alone		Attempted copulation	0	0	592.998
TrpB4_L8	30_dpr1_ uas_stop_TrpA1_ FruFLP3_male alone	loss of righting reflex. I think the wing ext. is throwing him off balance	Attempted copulation	0	0	600
TrpB4_M2	30_dpr1_ uas_stop_TrpA1_ FruFLP4_male alone		Attempted copulation	0	0	600
TrpB4_K8	30_dpr1_ uas_stop_TrpA1_ FruFLP5_male alone	weird "bucking" beahvior ~301	Attempted copulation	0	0	600
TrpB4_L6	30_dpr1_ uas_stop_TrpA1_ FruFLP6_male alone	a lot of head rubbing	Attempted copulation	0	0	589.598
TrpB4_C5	30_dpr1_ uas_stop_TrpA1_ FruFLP7_male alone	abdomen bobbing - but does stop	Attempted copulation	0	0	600
TrpB4_G2	30_dpr1_ uas_stop_TrpA1_ FruFLP8_male alone		Attempted copulation	0	0	600
TrpB4_H6	30_dpr1_ uas_stop_TrpA1_ FruFLP9_male alone		Attempted copulation	0	0	600
TrpB1_D4	30_dpr10_gal4, uas_stop_Trpa1, FruFLP_male alone 1		Attempted copulation	0	0	600
TrpB1_G4	30_dpr10_gal4, uas_stop_Trpa1, FruFLP_male alone 10		Attempted copulation	0	0	600
TrpB1_M4	30_dpr10_gal4, uas_stop_Trpa1, FruFLP_male alone 11		Attempted copulation	0	0	600
TrpB1_K3	30_dpr10_gal4, uas_stop_Trpa1, FruFLP_male alone 2		Attempted copulation	0	0	600
TrpB1_L2	30_dpr10_gal4, uas_stop_Trpa1, FruFLP_male alone 3		Attempted copulation	0	0	600
TrpB1_C9	30_dpr10_gal4, uas_stop_Trpa1, FruFLP_male alone 4		Attempted copulation	0	0	600
TrpB1_H8	30_dpr10_gal4, uas_stop_Trpa1, FruFLP_male alone 5		Attempted copulation	0	0	600
TrpB1_E8	30_dpr10_gal4, uas_stop_Trpa1, FruFLP_male alone 6		Attempted copulation	0	0	600
TrpB1_B9	30_dpr10_gal4, uas_stop_Trpa1, FruFLP_male alone 8		Attempted copulation	0	0	600
TrpB1_J2	30_dpr10_gal4, uas_stop_Trpa1, FruFLP_male alone 9		Attempted copulation	0	0	600
TrpB1_E6	30_dpr11_gal4, uas_stop_Trpa1, FruFLP1_male alone		Attempted copulation	0	0	600
TrpB1_H7	30_dpr11_gal4, uas_stop_Trpa1, FruFLP10_male alone		Attempted copulation	0	0	600
TrpB1_D1	30_dpr11_gal4, uas_stop_Trpa1, FruFLP2_male alone		Attempted copulation	0	0	600
TrpB1_H1	30_dpr11_gal4, uas_stop_Trpa1, FruFLP3_male alone		Attempted copulation	0	0	595.33
TrpB1_G2	30_dpr11_gal4, uas_stop_Trpa1, FruFLP4_male alone		Attempted copulation	0	0	600
TrpB1_M3	30_dpr11_gal4, uas_stop_Trpa1, FruFLP5_male alone		Attempted copulation	0	0	600
TrpB1_K4	30_dpr11_gal4, uas_stop_Trpa1, FruFLP6_male alone		Attempted copulation	0	0	600
TrpB1_B5	30_dpr11_gal4, uas_stop_Trpa1, FruFLP7_male alone		Attempted copulation	0	0	600
TrpB1_E4	30_dpr11_gal4, uas_stop_Trpa1, FruFLP8_male alone		Attempted copulation	0	0	600
TrpB1_L8	30_dpr11_gal4, uas_stop_Trpa1, FruFLP9_male alone		Attempted copulation	0	0	600
TrpB1_B7	30_dpr12_gal4, uas_stop_Trpa1, FruFLP_male alone 1		Attempted copulation	0	0	600
TrpB2_B1	30_dpr12_gal4, uas_stop_Trpa1, FruFLP_male alone 10		Attempted copulation	0	0	600
TrpB1_F4	30_dpr12_gal4, uas_stop_Trpa1, FruFLP_male alone 2		Attempted copulation	0	0	600
TrpB1_C8	30_dpr12_gal4, uas_stop_Trpa1, FruFLP_male alone 4	ejaculation ~489	Attempted copulation	0	0	600
TrpB1_L5	30_dpr12_gal4, uas_stop_Trpa1, FruFLP_male alone 5		Attempted copulation	0	0	600
TrpB2_F5	30_dpr12_gal4, uas_stop_Trpa1, FruFLP_male alone 6		Attempted copulation	0	0	600
TrpB1_M5	30_dpr12_gal4, uas_stop_Trpa1, FruFLP_male alone 7	ejaculation ~259	Attempted copulation	0	0	600
TrpB2_E5	30_dpr12_gal4, uas_stop_Trpa1, FruFLP_male alone 7	ejaculation ~259	Attempted copulation	0	0	600
TrpB2_K2	30_dpr12_gal4, uas_stop_Trpa1, FruFLP_male alone 8		Attempted copulation	0	0	600
TrpB2_K8	30_dpr12_gal4, uas_stop_Trpa1, FruFLP_male alone 9	ejaculation ~126	Attempted copulation	0	0	600
TrpB5_M8	30_dpr14_ uas_stop_TrpA1_ FruFLP1_male alone	in the 1st 2/3rds of video, fly was positioned in such a way that it was difficult to see the abdomen but it appeared as though fly was rubbing external genitalia a bunch	Attempted copulation	0	0	600
TrpB5_E3	30_dpr14_ uas_stop_TrpA1_ FruFLP10_male alone		Attempted copulation	0	0	600
TrpB5_C8	30_dpr14_ uas_stop_TrpA1_ FruFLP2_male alone		Attempted copulation	0	0	600
TrpB5_G6	30_dpr14_ uas_stop_TrpA1_ FruFLP3_male alone	wing fluttering,, not as far as extension	Attempted copulation	0	0	600
TrpB5_F7	30_dpr14_ uas_stop_TrpA1_ FruFLP4_male alone	more wing fluttering less ext.	Attempted copulation	0	0	600
TrpB5_B6	30_dpr14_ uas_stop_TrpA1_ FruFLP5_male alone		Attempted copulation	0	0	600
TrpB5_A3	30_dpr14_ uas_stop_TrpA1_ FruFLP6_male alone		Attempted copulation	0	0	600
TrpB5_D8	30_dpr14_ uas_stop_TrpA1_ FruFLP7_male alone		Attempted copulation	0	0	600
TrpB5_K5	30_dpr14_ uas_stop_TrpA1_ FruFLP8_male alone	ejaculation~ 65?	Attempted copulation	0	0	600
TrpB5_E8	30_dpr14_ uas_stop_TrpA1_ FruFLP9_male alone		Attempted copulation	0	0	600
TrpB3_G5	30_dpr15_ uas_stop_TrpA1_ FruFLP1_male alone		Attempted copulation	0	0	600
TrpB3_K5	30_dpr15_ uas_stop_TrpA1_ FruFLP10_male alone	Definitely vibrating wing but not extending very far	Attempted copulation	0	0	600
TrpB3_K4	30_dpr15_ uas_stop_TrpA1_ FruFLP2_male alone		Attempted copulation	0	0	600
TrpB3_B8	30_dpr15_ uas_stop_TrpA1_ FruFLP3_male alone		Attempted copulation	0	0	600
TrpB3_D6	30_dpr15_ uas_stop_TrpA1_ FruFLP4_male alone		Attempted copulation	0	0	600
TrpB3_K2	30_dpr15_ uas_stop_TrpA1_ FruFLP5_male alone		Attempted copulation	0	0	600
TrpB3_G9	30_dpr15_ uas_stop_TrpA1_ FruFLP6_male alone		Attempted copulation	0	0	600
TrpB3_J8	30_dpr15_ uas_stop_TrpA1_ FruFLP7_male alone		Attempted copulation	0	0	600
TrpB3_G7	30_dpr15_ uas_stop_TrpA1_ FruFLP8_male alone		Attempted copulation	0	0	600
TrpB3_F6	30_dpr15_ uas_stop_TrpA1_ FruFLP9_male alone	Can't tell if wings stuck out or dbl wing ext.	Attempted copulation	0	0	600
TrpB3_A5	30_dpr16_ uas_stop_TrpA1_ FruFLP1_male alone		Attempted copulation	0	0	600
TrpB3_K6	30_dpr16_ uas_stop_TrpA1_ FruFLP10_male alone		Attempted copulation	0	0	600
TrpB3_B3	30_dpr16_ uas_stop_TrpA1_ FruFLP2_male alone		Attempted copulation	0	0	600
TrpB3_L1	30_dpr16_ uas_stop_TrpA1_ FruFLP3_male alone		Attempted copulation	0	0	600
TrpB3_G2	30_dpr16_ uas_stop_TrpA1_ FruFLP4_male alone		Attempted copulation	0	0	600
TrpB3_L3	30_dpr16_ uas_stop_TrpA1_ FruFLP5_male alone		Attempted copulation	0	0	600
TrpB3_H1	30_dpr16_ uas_stop_TrpA1_ FruFLP6_male alone		Attempted copulation	0	0	600
TrpB3_G6	30_dpr16_ uas_stop_TrpA1_ FruFLP7_male alone		Attempted copulation	0	0	600
TrpB3_J1	30_dpr16_ uas_stop_TrpA1_ FruFLP8_male alone		Attempted copulation	0	0	600
TrpB3_A9	30_dpr16_ uas_stop_TrpA1_ FruFLP9_male alone		Attempted copulation	0	0	600
TrpB1_A4	30_dpr17_gal4, uas_stop_Trpa1, FruFLP1_male alone		Attempted copulation	0	0	600
TrpB1_F5	30_dpr17_gal4, uas_stop_Trpa1, FruFLP10_male alone		Attempted copulation	0	0	600
TrpB1_E7	30_dpr17_gal4, uas_stop_Trpa1, FruFLP2_male alone		Attempted copulation	0	0	600
TrpB1_M1	30_dpr17_gal4, uas_stop_Trpa1, FruFLP3_male alone		Attempted copulation	0	0	600
TrpB1_F6	30_dpr17_gal4, uas_stop_Trpa1, FruFLP4_male alone		Attempted copulation	0	0	600
TrpB1_F2	30_dpr17_gal4, uas_stop_Trpa1, FruFLP5_male alone		Attempted copulation	0	0	600
TrpB1_B4	30_dpr17_gal4, uas_stop_Trpa1, FruFLP6_male alone		Attempted copulation	0	0	600
TrpB1_C6	30_dpr17_gal4, uas_stop_Trpa1, FruFLP7_male alone		Attempted copulation	0	0	600
TrpB1_J8	30_dpr17_gal4, uas_stop_Trpa1, FruFLP8_male alone		Attempted copulation	0	0	600
TrpB1_B2	30_dpr17_gal4, uas_stop_Trpa1, FruFLP9_male alone		Attempted copulation	0	0	600
TrpB4_K1	30_dpr18_ uas_stop_TrpA1_ FruFLP1_male alone		Attempted copulation	0	0	600
TrpB4_H9	30_dpr18_ uas_stop_TrpA1_ FruFLP10_male alone		Attempted copulation	0	0	600
TrpB4_F5	30_dpr18_ uas_stop_TrpA1_ FruFLP2_male alone	less wing extension more wing vibration	Attempted copulation	0	0	600
TrpB4_E6	30_dpr18_ uas_stop_TrpA1_ FruFLP3_male alone		Attempted copulation	0	0	600
TrpB4_J5	30_dpr18_ uas_stop_TrpA1_ FruFLP4_male alone		Attempted copulation	0	0	600
TrpB4_J6	30_dpr18_ uas_stop_TrpA1_ FruFLP5_male alone		Attempted copulation	0	0	600
TrpB4_F2	30_dpr18_ uas_stop_TrpA1_ FruFLP6_male alone		Attempted copulation	0	0	600
TrpB4_L5	30_dpr18_ uas_stop_TrpA1_ FruFLP7_male alone		Attempted copulation	0	0	600
TrpB4_E4	30_dpr18_ uas_stop_TrpA1_ FruFLP8_male alone		Attempted copulation	0	0	600
TrpB4_D2	30_dpr18_ uas_stop_TrpA1_ FruFLP9_male alone		Attempted copulation	0	0	600
TrpB1_F8	30_dpr2_gal4, uas_stop_Trpa1, FruFLP1_male alone		Attempted copulation	0	0	600
TrpB1_L3	30_dpr2_gal4, uas_stop_Trpa1, FruFLP10_male alone		Attempted copulation	0	0	600
TrpB1_K9	30_dpr2_gal4, uas_stop_Trpa1, FruFLP2_male alone		Attempted copulation	0	0	600
TrpB1_H9	30_dpr2_gal4, uas_stop_Trpa1, FruFLP3_male alone		Attempted copulation	0	0	600
TrpB1_K1	30_dpr2_gal4, uas_stop_Trpa1, FruFLP4_male alone		Attempted copulation	0	0	600
TrpB1_E9	30_dpr2_gal4, uas_stop_Trpa1, FruFLP5_male alone		Attempted copulation	0	0	600
TrpB1_F3	30_dpr2_gal4, uas_stop_Trpa1, FruFLP6_male alone		Attempted copulation	0	0	600
TrpB1_G7	30_dpr2_gal4, uas_stop_Trpa1, FruFLP7_male alone	Funny jerky movements. Also loss of righting	Attempted copulation	0	0	600
TrpB1_A5	30_dpr2_gal4, uas_stop_Trpa1, FruFLP8_male alone		Attempted copulation	0	0	600
TrpB1_F7	30_dpr2_gal4, uas_stop_Trpa1, FruFLP9_male alone		Attempted copulation	0	0	600
TrpB2_A8	30_dpr3_ uas_stop_TrpA1_ FruFLP1_male alone		Attempted copulation	0	0	600
TrpB2_A2	30_dpr3_ uas_stop_TrpA1_ FruFLP10_male alone		Attempted copulation	0	0	600
TrpB2_E4	30_dpr3_ uas_stop_TrpA1_ FruFLP2_male alone		Attempted copulation	0	0	600
TrpB2_G2	30_dpr3_ uas_stop_TrpA1_ FruFLP3_male alone		Attempted copulation	0	0	600
TrpB2_K6	30_dpr3_ uas_stop_TrpA1_ FruFLP4_male alone		Attempted copulation	0	0	600
TrpB2_E8	30_dpr3_ uas_stop_TrpA1_ FruFLP5_male alone		Attempted copulation	0	0	600
TrpB2_C9	30_dpr3_ uas_stop_TrpA1_ FruFLP6_male alone		Attempted copulation	0	0	600
TrpB2_D6	30_dpr3_ uas_stop_TrpA1_ FruFLP7_male alone		Attempted copulation	0	0	600
TrpB2_L1	30_dpr3_ uas_stop_TrpA1_ FruFLP8_male alone		Attempted copulation	0	0	600
TrpB2_F1	30_dpr3_ uas_stop_TrpA1_ FruFLP9_male alone		Attempted copulation	0	0	600
TrpB5_F1	30_dpr4_ uas_stop_TrpA1_ FruFLP1_male alone		Attempted copulation	0	0	600
TrpB5_M5	30_dpr4_ uas_stop_TrpA1_ FruFLP10_male alone		Attempted copulation	0	0	600
TrpB5_B4	30_dpr4_ uas_stop_TrpA1_ FruFLP2_male alone		Attempted copulation	0	0	600
TrpB5_M4	30_dpr4_ uas_stop_TrpA1_ FruFLP3_male alone		Attempted copulation	0	0	600
TrpB5_E4	30_dpr4_ uas_stop_TrpA1_ FruFLP4_male alone		Attempted copulation	0	0	600
TrpB5_K1	30_dpr4_ uas_stop_TrpA1_ FruFLP5_male alone		Attempted copulation	0	0	600
TrpB5_J6	30_dpr4_ uas_stop_TrpA1_ FruFLP6_male alone		Attempted copulation	0	0	600
TrpB5_A2	30_dpr4_ uas_stop_TrpA1_ FruFLP7_male alone	more wing fluttering less ext.	Attempted copulation	0	0	600
TrpB5_N6	30_dpr4_ uas_stop_TrpA1_ FruFLP8_male alone		Attempted copulation	0	0	600
TrpB5_A1	30_dpr4_ uas_stop_TrpA1_ FruFLP9_male alone	loss of righting-- more wing fluttering less of ext.	Attempted copulation	0	0	600
TrpB4_K3	30_dpr5_ uas_stop_TrpA1_ FruFLP1_male alone	ejaculation ~61	Attempted copulation	0	0	600
TrpB4_G7	30_dpr5_ uas_stop_TrpA1_ FruFLP10_male alone	ejaculation ~55, does not ext wings far but they are vibrating	Attempted copulation	0	0	600
TrpB4_L4	30_dpr5_ uas_stop_TrpA1_ FruFLP2_male alone		Attempted copulation	0	0	599.33
TrpB4_F6	30_dpr5_ uas_stop_TrpA1_ FruFLP3_male alone		Attempted copulation	0	0	600
TrpB4_A9	30_dpr5_ uas_stop_TrpA1_ FruFLP4_male alone	wing vibrations but not so much extension	Attempted copulation	0	0	600
TrpB4_M6	30_dpr5_ uas_stop_TrpA1_ FruFLP5_male alone	ejaculation ~ 75/80?	Attempted copulation	0	0	600
TrpB4_E1	30_dpr5_ uas_stop_TrpA1_ FruFLP6_male alone		Attempted copulation	0	0	600
TrpB4_D4	30_dpr5_ uas_stop_TrpA1_ FruFLP7_male alone	ejaculation ~185 more wing vibration less extension	Attempted copulation	0	0	600
TrpB4_C8	30_dpr5_ uas_stop_TrpA1_ FruFLP8_male alone	ejaculation ~75? Again ~145	Attempted copulation	0	0	600
TrpB4_A8	30_dpr5_ uas_stop_TrpA1_ FruFLP9_male alone		Attempted copulation	0	0	600
TrpB5_M6	30_dpr6_ uas_stop_TrpA1_ FruFLP1_male alone		Attempted copulation	0	0	600
TrpB5_J2	30_dpr6_ uas_stop_TrpA1_ FruFLP10_male alone		Attempted copulation	0	0	600
TrpB5_M7	30_dpr6_ uas_stop_TrpA1_ FruFLP2_male alone		Attempted copulation	0	0	600
TrpB5_G3	30_dpr6_ uas_stop_TrpA1_ FruFLP3_male alone		Attempted copulation	0	0	600
TrpB5_J9	30_dpr6_ uas_stop_TrpA1_ FruFLP4_male alone		Attempted copulation	0	0	600
TrpB5_G1	30_dpr6_ uas_stop_TrpA1_ FruFLP5_male alone		Attempted copulation	0	0	600
TrpB5_J8	30_dpr6_ uas_stop_TrpA1_ FruFLP6_male alone		Attempted copulation	0	0	600
TrpB5_D2	30_dpr6_ uas_stop_TrpA1_ FruFLP7_male alone		Attempted copulation	0	0	600
TrpB5_L5	30_dpr6_ uas_stop_TrpA1_ FruFLP8_male alone		Attempted copulation	0	0	600
TrpB5_J4	30_dpr6_ uas_stop_TrpA1_ FruFLP9_male alone		Attempted copulation	0	0	600
TrpB4_D3	30_dpr8_ uas_stop_TrpA1_ FruFLP1_male alone		Attempted copulation	0	0	600
TrpB4_K6	30_dpr8_ uas_stop_TrpA1_ FruFLP10_male alone		Attempted copulation	0	0	600
TrpB4_K4	30_dpr8_ uas_stop_TrpA1_ FruFLP2_male alone		Attempted copulation	0	0	600
TrpB4_M4	30_dpr8_ uas_stop_TrpA1_ FruFLP3_male alone		Attempted copulation	0	0	600
TrpB4_E7	30_dpr8_ uas_stop_TrpA1_ FruFLP4_male alone		Attempted copulation	0	0	600
TrpB4_J2	30_dpr8_ uas_stop_TrpA1_ FruFLP5_male alone		Attempted copulation	0	0	600
TrpB4_H3	30_dpr8_ uas_stop_TrpA1_ FruFLP6_male alone	sometimes flicks wings up very briefly. Not really an extension (ex. ~584)	Attempted copulation	0	0	600
TrpB4_B5	30_dpr8_ uas_stop_TrpA1_ FruFLP7_male alone		Attempted copulation	0	0	600
TrpB4_F3	30_dpr8_ uas_stop_TrpA1_ FruFLP8_male alone		Attempted copulation	0	0	600
TrpB4_B1	30_dpr8_ uas_stop_TrpA1_ FruFLP9_male alone		Attempted copulation	0	0	600
TrpB4_L9	30_dpr9_ uas_stop_TrpA1_ FruFLP1_male alone		Attempted copulation	0	0	600
TrpB4_D9	30_dpr9_ uas_stop_TrpA1_ FruFLP10_male alone		Attempted copulation	0	0	600
TrpB4_F8	30_dpr9_ uas_stop_TrpA1_ FruFLP2_male alone	ejaculation ~140	Attempted copulation	0	0	600
TrpB4_C1	30_dpr9_ uas_stop_TrpA1_ FruFLP3_male alone	more than abdominal bending. Clearly thrusting	Attempted copulation	0	0	600
TrpB4_A5	30_dpr9_ uas_stop_TrpA1_ FruFLP4_male alone		Attempted copulation	0	0	600
TrpB4_D5	30_dpr9_ uas_stop_TrpA1_ FruFLP5_male alone		Attempted copulation	0	0	600
TrpB4_J8	30_dpr9_ uas_stop_TrpA1_ FruFLP6_male alone		Attempted copulation	0	0	600
TrpB4_G5	30_dpr9_ uas_stop_TrpA1_ FruFLP7_male alone		Attempted copulation	0	0	600
TrpB4_M3	30_dpr9_ uas_stop_TrpA1_ FruFLP8_male alone	proboscis extensions b/w ~135 & 140-- didn’t really continue	Attempted copulation	0	0	600
TrpB4_L1	30_dpr9_ uas_stop_TrpA1_ FruFLP9_male alone		Attempted copulation	0	0	600
TrpB5_K4	30_FruFLP1_male alone		Attempted copulation	0	0	600
TrpB5_N8	30_FruFLP10_male alone	ejaculation~ 100?	Attempted copulation	0	0	600
TrpB5_C6	30_FruFLP2_male alone		Attempted copulation	0	0	600
TrpB5_C1	30_FruFLP3_male alone		Attempted copulation	0	0	600
TrpB5_E1	30_FruFLP4_male alone		Attempted copulation	0	0	600
TrpB5_A7	30_FruFLP5_male alone		Attempted copulation	0	0	600
TrpB5_K9	30_FruFLP6_male alone		Attempted copulation	0	0	600
TrpB5_A6	30_FruFLP7_male alone	jerky movements	Attempted copulation	0	0	600
TrpB5_C5	30_FruFLP8_male alone		Attempted copulation	0	0	600
TrpB5_D4	30_FruFLP9_male alone		Attempted copulation	0	0	600
TrpB5_A5	30_TrpA1_1_male alone		Attempted copulation	0	0	600
TrpB5_K8	30_TrpA1_10_male alone		Attempted copulation	0	0	600
TrpB5_E5	30_TrpA1_2_male alone		Attempted copulation	0	0	600
TrpB5_C4	30_TrpA1_3_male alone		Attempted copulation	0	0	600
TrpB5_C7	30_TrpA1_4_male alone		Attempted copulation	0	0	600
TrpB5_L3	30_TrpA1_5_male alone		Attempted copulation	0	0	600
TrpB5_A8	30_TrpA1_6_male alone	abdomen bobbing	Attempted copulation	0	0	600
TrpB5_L1	30_TrpA1_7_male alone	jerky sideways walking-- wing seems offset but not extending or vibrating	Attempted copulation	0	0	600
TrpB5_A9	30_TrpA1_8_male alone		Attempted copulation	0	0	600
TrpB5_O2	30_TrpA1_9_male alone		Attempted copulation	0	0	600
TrpB5_F4	20_CS1_male alone		Double wing extend	0	0	600
TrpB5_F2	20_CS10_male alone		Double wing extend	0	0	600
TrpB5_F3	20_CS2_male alone		Double wing extend	0	0	600
TrpB5_B8	20_CS3_male alone		Double wing extend	0	0	600
TrpB5_L4	20_CS4_male alone		Double wing extend	0	0	600
TrpB5_H9	20_CS5_male alone		Double wing extend	1	2.051	600
TrpB5_G4	20_CS6_male alone	proboscis ext. ~280	Double wing extend	0	0	600
TrpB5_M9	20_CS7_male alone		Double wing extend	0	0	600
TrpB5_N2	20_CS8_male alone		Double wing extend	0	0	600
TrpB5_K2	20_CS9_male alone	proboscis ext. ex~145, 165, 210 & many more	Double wing extend	0	0	600
TrpB2_L7	20_DIPalpha_ uas_stop_TrpA1_ FruFLP1_male alone		Double wing extend	0	0	600
TrpB2_J8	20_DIPalpha_ uas_stop_TrpA1_ FruFLP10_male alone		Double wing extend	0	0	600
TrpB2_C1	20_DIPalpha_ uas_stop_TrpA1_ FruFLP2_male alone		Double wing extend	0	0	600
TrpB2_D2	20_DIPalpha_ uas_stop_TrpA1_ FruFLP3_male alone		Double wing extend	0	0	600
TrpB2_F8	20_DIPalpha_ uas_stop_TrpA1_ FruFLP4_male alone		Double wing extend	0	0	600
TrpB2_J1	20_DIPalpha_ uas_stop_TrpA1_ FruFLP5_male alone		Double wing extend	0	0	600
TrpB2_B2	20_DIPalpha_ uas_stop_TrpA1_ FruFLP6_male alone		Double wing extend	1	0.333255	600
TrpB2_G7	20_DIPalpha_ uas_stop_TrpA1_ FruFLP7_male alone		Double wing extend	0	0	600
TrpB2_D3	20_DIPalpha_ uas_stop_TrpA1_ FruFLP8_male alone		Double wing extend	0	0	600
TrpB2_A6	20_DIPalpha_ uas_stop_TrpA1_ FruFLP9_male alone		Double wing extend	0	0	600
TrpB1_D6	20_DIPbeta_gal4, uas_stop_Trpa1, FruFLP1_male alone		Double wing extend	0	0	600
TrpB1_J9	20_DIPbeta_gal4, uas_stop_Trpa1, FruFLP10_male alone		Double wing extend	0	0	600
TrpB1_L6	20_DIPbeta_gal4, uas_stop_Trpa1, FruFLP2_male alone		Double wing extend	8	9.17695	600
TrpB1_K8	20_DIPbeta_gal4, uas_stop_Trpa1, FruFLP3_male alone		Double wing extend	0	0	600
TrpB1_A7	20_DIPbeta_gal4, uas_stop_Trpa1, FruFLP4_male alone		Double wing extend	0	0	600
TrpB1_E3	20_DIPbeta_gal4, uas_stop_Trpa1, FruFLP5_male alone		Double wing extend	0	0	600
TrpB1_F9	20_DIPbeta_gal4, uas_stop_Trpa1, FruFLP6_male alone		Double wing extend	0	0	600
TrpB1_E2	20_DIPbeta_gal4, uas_stop_Trpa1, FruFLP7_male alone		Double wing extend	0	0	600
TrpB1_G6	20_DIPbeta_gal4, uas_stop_Trpa1, FruFLP8_male alone		Double wing extend	0	0	600
TrpB1_A2	20_DIPbeta_gal4, uas_stop_Trpa1, FruFLP9_male alone		Double wing extend	0	0	600
TrpB3_D2	20_DIPdelta_ uas_stop_TrpA1_ FruFLP1_male alone		Double wing extend	0	0	600
TrpB3_C5	20_DIPdelta_ uas_stop_TrpA1_ FruFLP10_male alone	Loss of righting--starts early	Double wing extend	0	0	600
TrpB3_H2	20_DIPdelta_ uas_stop_TrpA1_ FruFLP2_male alone		Double wing extend	0	0	600
TrpB3_K7	20_DIPdelta_ uas_stop_TrpA1_ FruFLP3_male alone		Double wing extend	0	0	600
TrpB3_E3	20_DIPdelta_ uas_stop_TrpA1_ FruFLP4_male alone		Double wing extend	0	0	600
TrpB3_E1	20_DIPdelta_ uas_stop_TrpA1_ FruFLP5_male alone	head rubbing-abdomen bobbing?	Double wing extend	0	0	600
TrpB3_C9	20_DIPdelta_ uas_stop_TrpA1_ FruFLP6_male alone	Lots of head rubbing	Double wing extend	0	0	600
TrpB3_A4	20_DIPdelta_ uas_stop_TrpA1_ FruFLP7_male alone		Double wing extend	0	0	600
TrpB3_M5	20_DIPdelta_ uas_stop_TrpA1_ FruFLP8_male alone		Double wing extend	0	0	600
TrpB3_H5	20_DIPdelta_ uas_stop_TrpA1_ FruFLP9_male alone		Double wing extend	0	0	600
TrpB2_H9	20_DIPepsilon_ uas_stop_TrpA1_ FruFLP1_male alone	Abdomen bobbing? Hard to tell. More in the beginning	Double wing extend	0	0	600
TrpB2_M5	20_DIPepsilon_ uas_stop_TrpA1_ FruFLP10_male alone		Double wing extend	0	0	600
TrpB2_E6	20_DIPepsilon_ uas_stop_TrpA1_ FruFLP2_male alone		Double wing extend	0	0	600
TrpB2_A5	20_DIPepsilon_ uas_stop_TrpA1_ FruFLP3_male alone		Double wing extend	0	0	600
TrpB2_G3	20_DIPepsilon_ uas_stop_TrpA1_ FruFLP4_male alone		Double wing extend	0	0	600
TrpB2_L8	20_DIPepsilon_ uas_stop_TrpA1_ FruFLP5_male alone		Double wing extend	0	0	600
TrpB2_D8	20_DIPepsilon_ uas_stop_TrpA1_ FruFLP6_male alone	Abdomen bobbing ~400	Double wing extend	0	0	600
TrpB2_C6	20_DIPepsilon_ uas_stop_TrpA1_ FruFLP7_male alone		Double wing extend	0	0	600
TrpB2_A7	20_DIPepsilon_ uas_stop_TrpA1_ FruFLP8_male alone		Double wing extend	0	0	600
TrpB2_B6	20_DIPepsilon_ uas_stop_TrpA1_ FruFLP9_male alone		Double wing extend	0	0	600
TrpB2_D4	20_DIPeta_ uas_stop_TrpA1_ FruFLP1_male alone		Double wing extend	0	0	600
TrpB2_K5	20_DIPeta_ uas_stop_TrpA1_ FruFLP10_male alone		Double wing extend	0	0	600
TrpB2_E1	20_DIPeta_ uas_stop_TrpA1_ FruFLP2_male alone		Double wing extend	10	174.771	600
TrpB2_F4	20_DIPeta_ uas_stop_TrpA1_ FruFLP3_male alone		Double wing extend	0	0	600
TrpB2_B3	20_DIPeta_ uas_stop_TrpA1_ FruFLP4_male alone		Double wing extend	0	0	600
TrpB2_D5	20_DIPeta_ uas_stop_TrpA1_ FruFLP5_male alone		Double wing extend	1	0.333255	600
TrpB2_K9	20_DIPeta_ uas_stop_TrpA1_ FruFLP6_male alone		Double wing extend	0	0	600
TrpB2_H8	20_DIPeta_ uas_stop_TrpA1_ FruFLP7_male alone		Double wing extend	0	0	600
TrpB2_F6	20_DIPeta_ uas_stop_TrpA1_ FruFLP8_male alone		Double wing extend	1	6.589	600
TrpB2_H3	20_DIPeta_ uas_stop_TrpA1_ FruFLP9_male alone		Double wing extend	0	0	600
TrpB2_J7	20_DIPgamma_ uas_stop_TrpA1_ FruFLP1_male alone		Double wing extend	0	0	600
TrpB2_E3	20_DIPgamma_ uas_stop_TrpA1_ FruFLP10_male alone		Double wing extend	0	0	600
TrpB2_B5	20_DIPgamma_ uas_stop_TrpA1_ FruFLP2_male alone		Double wing extend	0	0	600
TrpB2_C5	20_DIPgamma_ uas_stop_TrpA1_ FruFLP3_male alone		Double wing extend	0	0	600
TrpB2_K7	20_DIPgamma_ uas_stop_TrpA1_ FruFLP4_male alone		Double wing extend	0	0	600
TrpB2_H6	20_DIPgamma_ uas_stop_TrpA1_ FruFLP5_male alone		Double wing extend	0	0	595.597
TrpB2_A4	20_DIPgamma_ uas_stop_TrpA1_ FruFLP6_male alone		Double wing extend	0	0	600
TrpB2_F2	20_DIPgamma_ uas_stop_TrpA1_ FruFLP7_male alone		Double wing extend	0	0	600
TrpB2_C7	20_DIPgamma_ uas_stop_TrpA1_ FruFLP8_male alone		Double wing extend	0	0	600
TrpB2_L9	20_DIPgamma_ uas_stop_TrpA1_ FruFLP9_male alone		Double wing extend	0	0	600
TrpB3_L6	20_DIPTheta_ uas_stop_TrpA1_ FruFLP1_male alone		Double wing extend	0	0	599.663
TrpB3_G3	20_DIPTheta_ uas_stop_TrpA1_ FruFLP10_male alone	Jerky movements	Double wing extend	0	0	600
TrpB3_K8	20_DIPTheta_ uas_stop_TrpA1_ FruFLP2_male alone		Double wing extend	0	0	600
TrpB3_G1	20_DIPTheta_ uas_stop_TrpA1_ FruFLP3_male alone	beginning spins in circles	Double wing extend	1	0.66651	600
TrpB3_E8	20_DIPTheta_ uas_stop_TrpA1_ FruFLP4_male alone		Double wing extend	0	0	600
TrpB3_F2	20_DIPTheta_ uas_stop_TrpA1_ FruFLP5_male alone		Double wing extend	0	0	599.463
TrpB3_M6	20_DIPTheta_ uas_stop_TrpA1_ FruFLP6_male alone		Double wing extend	0	0	600
TrpB3_B5	20_DIPTheta_ uas_stop_TrpA1_ FruFLP7_male alone	Can't tell if wings stuck out or dbl wing ext. Clear proboscis extension happens ~507 but also before	Double wing extend	1	599.12	600
TrpB3_F9	20_DIPTheta_ uas_stop_TrpA1_ FruFLP8_male alone		Double wing extend	0	0	600
TrpB3_F4	20_DIPTheta_ uas_stop_TrpA1_ FruFLP9_male alone		Double wing extend	0	0	600
TrpB3_M3	20_DIPzeta_ uas_stop_TrpA1_ FruFLP1_male alone		Double wing extend	0	0	600
TrpB3_E5	20_DIPzeta_ uas_stop_TrpA1_ FruFLP10_male alone		Double wing extend	0	0	600
TrpB3_B4	20_DIPzeta_ uas_stop_TrpA1_ FruFLP2_male alone		Double wing extend	0	0	600
TrpB3_J5	20_DIPzeta_ uas_stop_TrpA1_ FruFLP3_male alone		Double wing extend	0	0	600
TrpB3_A1	20_DIPzeta_ uas_stop_TrpA1_ FruFLP4_male alone	Abdomen bobbing starting ~80	Double wing extend	0	0	600
TrpB3_E2	20_DIPzeta_ uas_stop_TrpA1_ FruFLP5_male alone		Double wing extend	0	0	600
TrpB3_G8	20_DIPzeta_ uas_stop_TrpA1_ FruFLP6_male alone		Double wing extend	0	0	600
TrpB3_D7	20_DIPzeta_ uas_stop_TrpA1_ FruFLP7_male alone		Double wing extend	0	0	600
TrpB3_J6	20_DIPzeta_ uas_stop_TrpA1_ FruFLP8_male alone		Double wing extend	0	0	600
TrpB3_A3	20_DIPzeta_ uas_stop_TrpA1_ FruFLP9_male alone	Short* bouts of loss of righting. Ex. ~185	Double wing extend	0	0	600
TrpB4_G9	20_dpr1_ uas_stop_TrpA1_ FruFLP1_male alone		Double wing extend	0	0	600
TrpB4_C3	20_dpr1_ uas_stop_TrpA1_ FruFLP10_male alone		Double wing extend	0	0	600
TrpB4_F1	20_dpr1_ uas_stop_TrpA1_ FruFLP2_male alone	abdomen bobbing ~400	Double wing extend	0	0	600
TrpB4_K2	20_dpr1_ uas_stop_TrpA1_ FruFLP3_male alone		Double wing extend	0	0	600
TrpB4_J7	20_dpr1_ uas_stop_TrpA1_ FruFLP4_male alone		Double wing extend	0	0	600
TrpB4_C4	20_dpr1_ uas_stop_TrpA1_ FruFLP5_male alone	Lots of head rubbing	Double wing extend	0	0	600
TrpB4_C7	20_dpr1_ uas_stop_TrpA1_ FruFLP6_male alone	lots of head and probocsis rubbing	Double wing extend	0	0	600
TrpB4_B7	20_dpr1_ uas_stop_TrpA1_ FruFLP7_male alone		Double wing extend	0	0	600
TrpB4_E5	20_dpr1_ uas_stop_TrpA1_ FruFLP8_male alone		Double wing extend	0	0	600
TrpB4_H2	20_dpr1_ uas_stop_TrpA1_ FruFLP9_male alone		Double wing extend	0	0	600
TrpB1_C2	20_dpr10_gal4, uas_stop_Trpa1, FruFLP_male alone 1		Double wing extend	0	0	600
TrpB1_A8	20_dpr10_gal4, uas_stop_Trpa1, FruFLP_male alone 10		Double wing extend	0	0	600
TrpB1_E1	20_dpr10_gal4, uas_stop_Trpa1, FruFLP_male alone 2		Double wing extend	0	0	600
TrpB1_J4	20_dpr10_gal4, uas_stop_Trpa1, FruFLP_male alone 3		Double wing extend	0	0	600
TrpB1_F1	20_dpr10_gal4, uas_stop_Trpa1, FruFLP_male alone 4		Double wing extend	0	0	600
TrpB1_D3	20_dpr10_gal4, uas_stop_Trpa1, FruFLP_male alone 5		Double wing extend	0	0	600
TrpB1_H5	20_dpr10_gal4, uas_stop_Trpa1, FruFLP_male alone 6		Double wing extend	0	0	600
TrpB1_D2	20_dpr10_gal4, uas_stop_Trpa1, FruFLP_male alone 7		Double wing extend	0	0	600
TrpB1_C1	20_dpr10_gal4, uas_stop_Trpa1, FruFLP_male alone 8		Double wing extend	0	0	600
TrpB1_E5	20_dpr10_gal4, uas_stop_Trpa1, FruFLP_male alone 9		Double wing extend	0	0	600
TrpB1_M2	20_dpr11_gal4, uas_stop_Trpa1, FruFL6P_male alone		Double wing extend	0	0	600
TrpB1_C3	20_dpr11_gal4, uas_stop_Trpa1, FruFLP1_male alone		Double wing extend	0	0	600
TrpB1_H4	20_dpr11_gal4, uas_stop_Trpa1, FruFLP10_male alone		Double wing extend	0	0	600
TrpB1_G3	20_dpr11_gal4, uas_stop_Trpa1, FruFLP2_male alone	Falls down a lot. Short bursts of loss of righting	Double wing extend	0	0	600
TrpB1_A3	20_dpr11_gal4, uas_stop_Trpa1, FruFLP3_male alone		Double wing extend	0	0	600
TrpB1_A9	20_dpr11_gal4, uas_stop_Trpa1, FruFLP4_male alone		Double wing extend	0	0	600
TrpB1_L7	20_dpr11_gal4, uas_stop_Trpa1, FruFLP5_male alone		Double wing extend	0	0	600
TrpB1_H2	20_dpr11_gal4, uas_stop_Trpa1, FruFLP7_male alone		Double wing extend	0	0	600
TrpB1_D8	20_dpr11_gal4, uas_stop_Trpa1, FruFLP8_male alone		Double wing extend	0	0	600
TrpB1_L4	20_dpr11_gal4, uas_stop_Trpa1, FruFLP9_male alone		Double wing extend	0	0	600
TrpB3_G4	20_dpr12_ uas_stop_TrpA1_ FruFLP1_male alone		Double wing extend	0	0	600
TrpB4_L3	20_dpr12_ uas_stop_TrpA1_ FruFLP10_male alone		Double wing extend	0	0	600
TrpB3_J4	20_dpr12_ uas_stop_TrpA1_ FruFLP2_male alone		Double wing extend	0	0	600
TrpB3_C4	20_dpr12_ uas_stop_TrpA1_ FruFLP3_male alone		Double wing extend	0	0	600
TrpB3_C2	20_dpr12_ uas_stop_TrpA1_ FruFLP4_male alone		Double wing extend	0	0	600
TrpB3_J7	20_dpr12_ uas_stop_TrpA1_ FruFLP5_male alone		Double wing extend	0	0	600
TrpB4_C6	20_dpr12_ uas_stop_TrpA1_ FruFLP6_male alone		Double wing extend	0	0	600
TrpB4_A3	20_dpr12_ uas_stop_TrpA1_ FruFLP7_male alone		Double wing extend	0	0	600
TrpB4_F7	20_dpr12_ uas_stop_TrpA1_ FruFLP8_male alone		Double wing extend	0	0	600
TrpB4_G1	20_dpr12_ uas_stop_TrpA1_ FruFLP9_male alone		Double wing extend	0	0	600
TrpB5_H5	20_dpr14_ uas_stop_TrpA1_ FruFLP1_male alone		Double wing extend	0	0	600
TrpB5_G7	20_dpr14_ uas_stop_TrpA1_ FruFLP10_male alone		Double wing extend	0	0	600
TrpB5_L6	20_dpr14_ uas_stop_TrpA1_ FruFLP2_male alone		Double wing extend	6	21.339	600
TrpB5_E7	20_dpr14_ uas_stop_TrpA1_ FruFLP3_male alone		Double wing extend	0	0	600
TrpB5_B7	20_dpr14_ uas_stop_TrpA1_ FruFLP4_male alone		Double wing extend	0	0	600
TrpB5_L9	20_dpr14_ uas_stop_TrpA1_ FruFLP5_male alone		Double wing extend	0	0	600
TrpB5_C3	20_dpr14_ uas_stop_TrpA1_ FruFLP6_male alone		Double wing extend	0	0	600
TrpB5_F6	20_dpr14_ uas_stop_TrpA1_ FruFLP7_male alone		Double wing extend	0	0	600
TrpB5_L2	20_dpr14_ uas_stop_TrpA1_ FruFLP8_male alone		Double wing extend	0	0	600
TrpB5_N7	20_dpr14_ uas_stop_TrpA1_ FruFLP9_male alone		Double wing extend	0	0	600
TrpB3_D8	20_dpr15_ uas_stop_TrpA1_ FruFLP1_male alone	abdomen bobbing	Double wing extend	0	0	600
TrpB3_C8	20_dpr15_ uas_stop_TrpA1_ FruFLP10_male alone	Lots of head rubbing	Double wing extend	0	0	600
TrpB3_H8	20_dpr15_ uas_stop_TrpA1_ FruFLP2_male alone		Double wing extend	0	0	600
TrpB3_B1	20_dpr15_ uas_stop_TrpA1_ FruFLP3_male alone		Double wing extend	0	0	600
TrpB3_A8	20_dpr15_ uas_stop_TrpA1_ FruFLP4_male alone		Double wing extend	0	0	600
TrpB3_J3	20_dpr15_ uas_stop_TrpA1_ FruFLP5_male alone		Double wing extend	0	0	600
TrpB3_H6	20_dpr15_ uas_stop_TrpA1_ FruFLP6_male alone		Double wing extend	0	0	600
TrpB3_L4	20_dpr15_ uas_stop_TrpA1_ FruFLP7_male alone		Double wing extend	0	0	600
TrpB3_B7	20_dpr15_ uas_stop_TrpA1_ FruFLP8_male alone		Double wing extend	0	0	600
TrpB3_F5	20_dpr15_ uas_stop_TrpA1_ FruFLP9_male alone		Double wing extend	0	0	600
TrpB3_C6	20_dpr16_ uas_stop_TrpA1_ FruFLP1_male alone	abdomen bobbing ~250	Double wing extend	0	0	600
TrpB3_F8	20_dpr16_ uas_stop_TrpA1_ FruFLP10_male alone	abdomen bobbing starting ~200	Double wing extend	0	0	600
TrpB3_M4	20_dpr16_ uas_stop_TrpA1_ FruFLP2_male alone		Double wing extend	0	0	600
TrpB3_H3	20_dpr16_ uas_stop_TrpA1_ FruFLP3_male alone		Double wing extend	0	0	600
TrpB3_K3	20_dpr16_ uas_stop_TrpA1_ FruFLP4_male alone	Lots of head rubbing	Double wing extend	0	0	600
TrpB3_H7	20_dpr16_ uas_stop_TrpA1_ FruFLP5_male alone		Double wing extend	0	0	600
TrpB3_B9	20_dpr16_ uas_stop_TrpA1_ FruFLP6_male alone	Proboscis ext. Rubs head constantly	Double wing extend	0	0	600
TrpB3_K9	20_dpr16_ uas_stop_TrpA1_ FruFLP7_male alone		Double wing extend	0	0	600
TrpB3_D4	20_dpr16_ uas_stop_TrpA1_ FruFLP8_male alone		Double wing extend	2	1.77	600
TrpB3_L9	20_dpr16_ uas_stop_TrpA1_ FruFLP9_male alone		Double wing extend	0	0	600
TrpB1_H3	20_dpr17_gal4, uas_stop_Trpa1, FruFLP1_male alone		Double wing extend	0	0	600
TrpB1_K2	20_dpr17_gal4, uas_stop_Trpa1, FruFLP10_male alone		Double wing extend	0	0	600
TrpB1_L9	20_dpr17_gal4, uas_stop_Trpa1, FruFLP2_male alone	Backwards walking. Abdomen bobbing.	Double wing extend	0	0	600
TrpB1_J7	20_dpr17_gal4, uas_stop_Trpa1, FruFLP3_male alone		Double wing extend	0	0	600
TrpB1_D9	20_dpr17_gal4, uas_stop_Trpa1, FruFLP4_male alone		Double wing extend	6	34.044	600
TrpB1_B6	20_dpr17_gal4, uas_stop_Trpa1, FruFLP5_male alone		Double wing extend	0	0	600
TrpB1_J1	20_dpr17_gal4, uas_stop_Trpa1, FruFLP6_male alone		Double wing extend	0	0	600
TrpB1_C4	20_dpr17_gal4, uas_stop_Trpa1, FruFLP7_male alone		Double wing extend	0	0	600
TrpB1_A6	20_dpr17_gal4, uas_stop_Trpa1, FruFLP8_male alone		Double wing extend	0	0	600
TrpB1_K5	20_dpr17_gal4, uas_stop_Trpa1, FruFLP9_male alone		Double wing extend	0	0	600
TrpB4_E8	20_dpr18_ uas_stop_TrpA1_ FruFLP1_male alone	lots of proboscis/head rubbing. Probsocis ext.	Double wing extend	0	0	600
TrpB4_G8	20_dpr18_ uas_stop_TrpA1_ FruFLP10_male alone		Double wing extend	0	0	600
TrpB4_K7	20_dpr18_ uas_stop_TrpA1_ FruFLP2_male alone		Double wing extend	0	0	600
TrpB4_A4	20_dpr18_ uas_stop_TrpA1_ FruFLP3_male alone		Double wing extend	0	0	600
TrpB4_H4	20_dpr18_ uas_stop_TrpA1_ FruFLP4_male alone		Double wing extend	0	0	600
TrpB4_G3	20_dpr18_ uas_stop_TrpA1_ FruFLP5_male alone		Double wing extend	0	0	600
TrpB4_D1	20_dpr18_ uas_stop_TrpA1_ FruFLP6_male alone		Double wing extend	0	0	600
TrpB4_D7	20_dpr18_ uas_stop_TrpA1_ FruFLP7_male alone		Double wing extend	0	0	600
TrpB4_A1	20_dpr18_ uas_stop_TrpA1_ FruFLP8_male alone		Double wing extend	0	0	600
TrpB4_C2	20_dpr18_ uas_stop_TrpA1_ FruFLP9_male alone		Double wing extend	0	0	600
TrpB1_K7	20_dpr2_gal4, uas_stop_Trpa1, FruFLP1_male alone		Double wing extend	0	0	600
TrpB1_G5	20_dpr2_gal4, uas_stop_Trpa1, FruFLP10_male alone		Double wing extend	0	0	600
TrpB1_D7	20_dpr2_gal4, uas_stop_Trpa1, FruFLP2_male alone		Double wing extend	0	0	600
TrpB1_C5	20_dpr2_gal4, uas_stop_Trpa1, FruFLP3_male alone		Double wing extend	0	0	600
TrpB1_M6	20_dpr2_gal4, uas_stop_Trpa1, FruFLP4_male alone		Double wing extend	0	0	600
TrpB1_C7	20_dpr2_gal4, uas_stop_Trpa1, FruFLP5_male alone		Double wing extend	0	0	600
TrpB1_L1	20_dpr2_gal4, uas_stop_Trpa1, FruFLP6_male alone		Double wing extend	0	0	600
TrpB1_J3	20_dpr2_gal4, uas_stop_Trpa1, FruFLP7_male alone		Double wing extend	0	0	600
TrpB1_J5	20_dpr2_gal4, uas_stop_Trpa1, FruFLP8_male alone		Double wing extend	0	0	600
TrpB1_K6	20_dpr2_gal4, uas_stop_Trpa1, FruFLP9_male alone		Double wing extend	0	0	600
TrpB2_D9	20_dpr3_ uas_stop_TrpA1_ FruFLP1_male alone	Abdomen bobbing ~200	Double wing extend	0	0	600
TrpB2_G5	20_dpr3_ uas_stop_TrpA1_ FruFLP10_male alone		Double wing extend	0	0	600
TrpB2_M4	20_dpr3_ uas_stop_TrpA1_ FruFLP2_male alone		Double wing extend	0	0	600
TrpB2_G9	20_dpr3_ uas_stop_TrpA1_ FruFLP3_male alone		Double wing extend	0	0	600
TrpB2_J9	20_dpr3_ uas_stop_TrpA1_ FruFLP4_male alone		Double wing extend	0	0	600
TrpB2_J3	20_dpr3_ uas_stop_TrpA1_ FruFLP5_male alone		Double wing extend	0	0	600
TrpB2_L2	20_dpr3_ uas_stop_TrpA1_ FruFLP6_male alone		Double wing extend	0	0	600
TrpB2_J4	20_dpr3_ uas_stop_TrpA1_ FruFLP7_male alone		Double wing extend	0	0	600
TrpB2_C2	20_dpr3_ uas_stop_TrpA1_ FruFLP8_male alone		Double wing extend	2	7.586	600
TrpB2_F7	20_dpr3_ uas_stop_TrpA1_ FruFLP9_male alone		Double wing extend	0	0	600
TrpB5_B5	20_dpr4_ uas_stop_TrpA1_ FruFLP1_male alone	Jerky movements, falling, loss of righting, proboscis extension	Double wing extend	0	0	600
TrpB5_H4	20_dpr4_ uas_stop_TrpA1_ FruFLP10_male alone		Double wing extend	0	0	600
TrpB5_N5	20_dpr4_ uas_stop_TrpA1_ FruFLP2_male alone		Double wing extend	0	0	600
TrpB5_G2	20_dpr4_ uas_stop_TrpA1_ FruFLP3_male alone		Double wing extend	1	0.221	600
TrpB5_A4	20_dpr4_ uas_stop_TrpA1_ FruFLP4_male alone		Double wing extend	0	0	600
TrpB5_B9	20_dpr4_ uas_stop_TrpA1_ FruFLP5_male alone		Double wing extend	0	0	600
TrpB5_L7	20_dpr4_ uas_stop_TrpA1_ FruFLP6_male alone		Double wing extend	0	0	600
TrpB5_B3	20_dpr4_ uas_stop_TrpA1_ FruFLP7_male alone		Double wing extend	0	0	600
TrpB5_G5	20_dpr4_ uas_stop_TrpA1_ FruFLP8_male alone		Double wing extend	0	0	600
TrpB5_J3	20_dpr4_ uas_stop_TrpA1_ FruFLP9_male alone		Double wing extend	0	0	600
TrpB4_J4	20_dpr5_ uas_stop_TrpA1_ FruFLP1_male alone	abdomen bobbing	Double wing extend	0	0	600
TrpB4_B3	20_dpr5_ uas_stop_TrpA1_ FruFLP10_male alone		Double wing extend	0	0	600
TrpB4_K9	20_dpr5_ uas_stop_TrpA1_ FruFLP2_male alone		Double wing extend	0	0	600
TrpB4_J3	20_dpr5_ uas_stop_TrpA1_ FruFLP3_male alone		Double wing extend	0	0	600
TrpB4_F4	20_dpr5_ uas_stop_TrpA1_ FruFLP4_male alone		Double wing extend	0	0	600
TrpB4_A2	20_dpr5_ uas_stop_TrpA1_ FruFLP5_male alone		Double wing extend	0	0	600
TrpB4_A6	20_dpr5_ uas_stop_TrpA1_ FruFLP6_male alone	abdomen bobbing	Double wing extend	0	0	600
TrpB4_E3	20_dpr5_ uas_stop_TrpA1_ FruFLP7_male alone		Double wing extend	0	0	600
TrpB4_B8	20_dpr5_ uas_stop_TrpA1_ FruFLP8_male alone		Double wing extend	0	0	600
TrpB4_B9	20_dpr5_ uas_stop_TrpA1_ FruFLP9_male alone		Double wing extend	0	0	600
TrpB5_H7	20_dpr6_ uas_stop_TrpA1_ FruFLP1_male alone		Double wing extend	0	0	600
TrpB5_D7	20_dpr6_ uas_stop_TrpA1_ FruFLP10_male alone	lots of head rubbing	Double wing extend	0	0	600
TrpB5_K3	20_dpr6_ uas_stop_TrpA1_ FruFLP2_male alone		Double wing extend	0	0	600
TrpB5_J1	20_dpr6_ uas_stop_TrpA1_ FruFLP3_male alone		Double wing extend	0	0	600
TrpB5_F9	20_dpr6_ uas_stop_TrpA1_ FruFLP4_male alone		Double wing extend	0	0	600
TrpB5_N4	20_dpr6_ uas_stop_TrpA1_ FruFLP5_male alone	lots of head rubbing	Double wing extend	0	0	600
TrpB5_L8	20_dpr6_ uas_stop_TrpA1_ FruFLP6_male alone		Double wing extend	0	0	600
TrpB5_K7	20_dpr6_ uas_stop_TrpA1_ FruFLP7_male alone		Double wing extend	0	0	600
TrpB5_D6	20_dpr6_ uas_stop_TrpA1_ FruFLP8_male alone		Double wing extend	0	0	600
TrpB5_G8	20_dpr6_ uas_stop_TrpA1_ FruFLP9_male alone	short bursts of loss of righting	Double wing extend	0	0	600
TrpB4_C9	20_dpr8_ uas_stop_TrpA1_ FruFLP1_male alone	abdomen bobbing	Double wing extend	0	0	600
TrpB4_K5	20_dpr8_ uas_stop_TrpA1_ FruFLP10_male alone		Double wing extend	0	0	600
TrpB4_F9	20_dpr8_ uas_stop_TrpA1_ FruFLP2_male alone	abdomen bobbing, probsicis ext. ~415	Double wing extend	0	0	600
TrpB4_B4	20_dpr8_ uas_stop_TrpA1_ FruFLP3_male alone		Double wing extend	0	0	600
TrpB4_H5	20_dpr8_ uas_stop_TrpA1_ FruFLP4_male alone	abdomen bobbing	Double wing extend	0	0	600
TrpB4_E2	20_dpr8_ uas_stop_TrpA1_ FruFLP5_male alone		Double wing extend	0	0	600
TrpB4_J1	20_dpr8_ uas_stop_TrpA1_ FruFLP6_male alone		Double wing extend	0	0	600
TrpB4_D6	20_dpr8_ uas_stop_TrpA1_ FruFLP7_male alone		Double wing extend	0	0	600
TrpB4_J9	20_dpr8_ uas_stop_TrpA1_ FruFLP8_male alone		Double wing extend	0	0	600
TrpB4_L2	20_dpr8_ uas_stop_TrpA1_ FruFLP9_male alone		Double wing extend	0	0	600
TrpB4_E9	20_dpr9_gal4, uas_stop_Trpa1, FruFLP_male alone 1	Lots of head rubbing	Double wing extend	0	0	600
TrpB4_B2	20_dpr9_gal4, uas_stop_Trpa1, FruFLP_male alone 10		Double wing extend	0	0	600
TrpB4_L7	20_dpr9_gal4, uas_stop_Trpa1, FruFLP_male alone 10		Double wing extend	0	0	600
TrpB4_H8	20_dpr9_gal4, uas_stop_Trpa1, FruFLP_male alone 2		Double wing extend	0	0	600
TrpB4_A7	20_dpr9_gal4, uas_stop_Trpa1, FruFLP_male alone 3		Double wing extend	0	0	600
TrpB4_G4	20_dpr9_gal4, uas_stop_Trpa1, FruFLP_male alone 4		Double wing extend	0	0	600
TrpB4_M5	20_dpr9_gal4, uas_stop_Trpa1, FruFLP_male alone 5		Double wing extend	0	0	600
TrpB4_D8	20_dpr9_gal4, uas_stop_Trpa1, FruFLP_male alone 6		Double wing extend	0	0	600
TrpB4_H1	20_dpr9_gal4, uas_stop_Trpa1, FruFLP_male alone 7		Double wing extend	0	0	600
TrpB4_M1	20_dpr9_gal4, uas_stop_Trpa1, FruFLP_male alone 8		Double wing extend	0	0	600
TrpB5_H1	20_FruFLP1_male alone		Double wing extend	1	0.266604	600
TrpB5_C2	20_FruFLP10_male alone		Double wing extend	0	0	600
TrpB5_M3	20_FruFLP2_male alone		Double wing extend	0	0	600
TrpB5_E2	20_FruFLP3_male alone		Double wing extend	0	0	600
TrpB5_F8	20_FruFLP4_male alone		Double wing extend	0	0	600
TrpB5_H6	20_FruFLP5_male alone		Double wing extend	0	0	600
TrpB5_D9	20_FruFLP6_male alone		Double wing extend	0	0	600
TrpB5_E6	20_FruFLP7_male alone		Double wing extend	0	0	600
TrpB5_H2	20_FruFLP8_male alone		Double wing extend	0	0	600
TrpB5_N3	20_FruFLP9_male alone		Double wing extend	0	0	600
TrpB5_J7	20_TrpA1_1_male alone		Double wing extend	4	9.64	600
TrpB5_E9	20_TrpA1_10_male alone		Double wing extend	4	7.323	600
TrpB5_N1	20_TrpA1_2_male alone		Double wing extend	0	0	600
TrpB5_O1	20_TrpA1_3_male alone		Double wing extend	0	0	600
TrpB5_F5	20_TrpA1_4_male alone	funny wings-- they look spread but not vibrating	Double wing extend	0	0	600
TrpB5_O3	20_TrpA1_5_male alone		Double wing extend	0	0	600
TrpB5_N9	20_TrpA1_6_male alone		Double wing extend	1	8.601	600
TrpB5_C9	20_TrpA1_7_male alone		Double wing extend	1	0.476	600
TrpB5_M1	20_TrpA1_8_male alone		Double wing extend	0	0	600
TrpB5_H3	20_TrpA1_9_male alone	jerky walking-- loss of righting	Double wing extend	23	27.861	600
TrpB5_H8	30_CS1_male alone		Double wing extend	1	1.13307	600
TrpB5_J5	30_CS10_male alone		Double wing extend	0	0	600
TrpB5_B2	30_CS2_male alone		Double wing extend	1	2.522	600
TrpB5_M2	30_CS3_male alone		Double wing extend	0	0	600
TrpB5_K6	30_CS4_male alone		Double wing extend	0	0	600
TrpB5_G9	30_CS5_male alone		Double wing extend	1	0.584	600
TrpB5_D1	30_CS6_male alone		Double wing extend	1	0.405	600
TrpB5_D3	30_CS7_male alone		Double wing extend	0	0	600
TrpB5_D5	30_CS8_male alone		Double wing extend	4	5.103	600
TrpB5_B1	30_CS9_male alone		Double wing extend	1	3.689	600
TrpB2_K4	30_DIPalpha_ uas_stop_TrpA1_ FruFLP1_male alone		Double wing extend	0	0	600
TrpB2_J2	30_DIPalpha_ uas_stop_TrpA1_ FruFLP10_male alone		Double wing extend	0	0	600
TrpB2_C4	30_DIPalpha_ uas_stop_TrpA1_ FruFLP2_male alone		Double wing extend	0	0	600
TrpB2_J6	30_DIPalpha_ uas_stop_TrpA1_ FruFLP3_male alone		Double wing extend	0	0	600
TrpB2_C8	30_DIPalpha_ uas_stop_TrpA1_ FruFLP4_male alone		Double wing extend	0	0	600
TrpB2_D1	30_DIPalpha_ uas_stop_TrpA1_ FruFLP5_male alone		Double wing extend	0	0	600
TrpB2_F9	30_DIPalpha_ uas_stop_TrpA1_ FruFLP6_male alone		Double wing extend	0	0	600
TrpB2_B8	30_DIPalpha_ uas_stop_TrpA1_ FruFLP7_male alone	Very jerky. Leg extension?	Double wing extend	0	0	600
TrpB2_K1	30_DIPalpha_ uas_stop_TrpA1_ FruFLP8_male alone	Jerky/funny leg movements	Double wing extend	0	0	600
TrpB2_L3	30_DIPalpha_ uas_stop_TrpA1_ FruFLP9_male alone		Double wing extend	0	0	600
TrpB1_G1	30_DIPbeta_gal4, uas_stop_Trpa1, FruFLP1_male alone		Double wing extend	0	0	600
TrpB1_B8	30_DIPbeta_gal4, uas_stop_Trpa1, FruFLP10_male alone		Double wing extend	0	0	600
TrpB1_H6	30_DIPbeta_gal4, uas_stop_Trpa1, FruFLP2_male alone		Double wing extend	1	1.86623	600
TrpB1_J6	30_DIPbeta_gal4, uas_stop_Trpa1, FruFLP3_male alone		Double wing extend	0	0	600
TrpB1_B1	30_DIPbeta_gal4, uas_stop_Trpa1, FruFLP4_male alone		Double wing extend	0	0	600
TrpB1_G9	30_DIPbeta_gal4, uas_stop_Trpa1, FruFLP5_male alone		Double wing extend	0	0	600
TrpB1_A1	30_DIPbeta_gal4, uas_stop_Trpa1, FruFLP6_male alone		Double wing extend	0	0	600
TrpB1_D5	30_DIPbeta_gal4, uas_stop_Trpa1, FruFLP7_male alone		Double wing extend	0	0	600
TrpB1_G8	30_DIPbeta_gal4, uas_stop_Trpa1, FruFLP8_male alone		Double wing extend	0	0	600
TrpB1_B3	30_DIPbeta_gal4, uas_stop_Trpa1, FruFLP9_male alone		Double wing extend	0	0	600
TrpB3_L5	30_DIPdelta_ uas_stop_TrpA1_ FruFLP1_male alone	Jerky walking ~200	Double wing extend	0	0	600
TrpB3_K1	30_DIPdelta_ uas_stop_TrpA1_ FruFLP10_male alone	abdomen bobbing	Double wing extend	0	0	600
TrpB3_E7	30_DIPdelta_ uas_stop_TrpA1_ FruFLP2_male alone		Double wing extend	0	0	600
TrpB3_H9	30_DIPdelta_ uas_stop_TrpA1_ FruFLP3_male alone		Double wing extend	0	0	600
TrpB3_F3	30_DIPdelta_ uas_stop_TrpA1_ FruFLP4_male alone		Double wing extend	0	0	600
TrpB3_J9	30_DIPdelta_ uas_stop_TrpA1_ FruFLP5_male alone		Double wing extend	0	0	600
TrpB3_J2	30_DIPdelta_ uas_stop_TrpA1_ FruFLP6_male alone		Double wing extend	0	0	600
TrpB3_E9	30_DIPdelta_ uas_stop_TrpA1_ FruFLP7_male alone		Double wing extend	0	0	600
TrpB3_F7	30_DIPdelta_ uas_stop_TrpA1_ FruFLP8_male alone		Double wing extend	0	0	600
TrpB3_D1	30_DIPdelta_ uas_stop_TrpA1_ FruFLP9_male alone		Double wing extend	0	0	600
TrpB2_M1	30_DIPepsilon_ uas_stop_TrpA1_ FruFLP1_male alone		Double wing extend	0	0	600
TrpB2_G6	30_DIPepsilon_ uas_stop_TrpA1_ FruFLP10_male alone		Double wing extend	0	0	600
TrpB2_J5	30_DIPepsilon_ uas_stop_TrpA1_ FruFLP2_male alone		Double wing extend	0	0	600
TrpB2_H4	30_DIPepsilon_ uas_stop_TrpA1_ FruFLP3_male alone		Double wing extend	2	1.041	600
TrpB2_M3	30_DIPepsilon_ uas_stop_TrpA1_ FruFLP4_male alone		Double wing extend	7	8.20807	600
TrpB2_H7	30_DIPepsilon_ uas_stop_TrpA1_ FruFLP5_male alone		Double wing extend	0	0	600
TrpB2_L4	30_DIPepsilon_ uas_stop_TrpA1_ FruFLP6_male alone		Double wing extend	8	2.94191	600
TrpB2_B4	30_DIPepsilon_ uas_stop_TrpA1_ FruFLP7_male alone		Double wing extend	0	0	600
TrpB2_C3	30_DIPepsilon_ uas_stop_TrpA1_ FruFLP8_male alone		Double wing extend	3	1.54926	600
TrpB2_E9	30_DIPepsilon_ uas_stop_TrpA1_ FruFLP9_male alone		Double wing extend	0	0	600
TrpB2_B9	30_DIPeta_ uas_stop_TrpA1_ FruFLP1_male alone		Double wing extend	10	135.489	600
TrpB2_D7	30_DIPeta_ uas_stop_TrpA1_ FruFLP10_male alone		Double wing extend	0	0	600
TrpB2_B7	30_DIPeta_ uas_stop_TrpA1_ FruFLP2_male alone		Double wing extend	0	0	600
TrpB2_G8	30_DIPeta_ uas_stop_TrpA1_ FruFLP3_male alone		Double wing extend	10	56.2259	600
TrpB2_A3	30_DIPeta_ uas_stop_TrpA1_ FruFLP4_male alone		Double wing extend	0	0	591.065
TrpB2_G1	30_DIPeta_ uas_stop_TrpA1_ FruFLP5_male alone		Double wing extend	0	0	600
TrpB2_M6	30_DIPeta_ uas_stop_TrpA1_ FruFLP6_male alone		Double wing extend	0	0	600
TrpB2_A9	30_DIPeta_ uas_stop_TrpA1_ FruFLP7_male alone		Double wing extend	0	0	600
TrpB2_M2	30_DIPeta_ uas_stop_TrpA1_ FruFLP8_male alone		Double wing extend	2	0.499	600
TrpB2_G4	30_DIPeta_ uas_stop_TrpA1_ FruFLP9_male alone		Double wing extend	0	0	600
TrpB2_A1	30_DIPgamma_ uas_stop_TrpA1_ FruFLP1_male alone		Double wing extend	34	242.77	600
TrpB2_E7	30_DIPgamma_ uas_stop_TrpA1_ FruFLP10_male alone		Double wing extend	3	17.156	600
TrpB2_H1	30_DIPgamma_ uas_stop_TrpA1_ FruFLP2_male alone		Double wing extend	1	1.777	600
TrpB2_H2	30_DIPgamma_ uas_stop_TrpA1_ FruFLP3_male alone		Double wing extend	0	0	600
TrpB2_F3	30_DIPgamma_ uas_stop_TrpA1_ FruFLP4_male alone		Double wing extend	0	0	600
TrpB2_H5	30_DIPgamma_ uas_stop_TrpA1_ FruFLP5_male alone		Double wing extend	0	0	600
TrpB2_L6	30_DIPgamma_ uas_stop_TrpA1_ FruFLP6_male alone	Abdomen bobbing- spins in circles occasionally. In beginning and ~270	Double wing extend	0	0	600
TrpB2_E2	30_DIPgamma_ uas_stop_TrpA1_ FruFLP7_male alone		Double wing extend	0	0	600
TrpB2_K3	30_DIPgamma_ uas_stop_TrpA1_ FruFLP8_male alone		Double wing extend	8	489.609	600
TrpB2_L5	30_DIPgamma_ uas_stop_TrpA1_ FruFLP9_male alone		Double wing extend	4	5.97	600
TrpB3_A2	30_DIPtheta_ uas_stop_TrpA1_ FruFLP1_male alone		Double wing extend	0	0	600
TrpB3_L7	30_DIPtheta_ uas_stop_TrpA1_ FruFLP10_male alone		Double wing extend	32	344.412	600
TrpB3_E4	30_DIPtheta_ uas_stop_TrpA1_ FruFLP2_male alone	ejaculation around 50?	Double wing extend	0	0	600
TrpB3_A6	30_DIPtheta_ uas_stop_TrpA1_ FruFLP3_male alone		Double wing extend	0	0	600
TrpB3_M2	30_DIPtheta_ uas_stop_TrpA1_ FruFLP4_male alone		Double wing extend	45	353.004	600
TrpB3_F1	30_DIPtheta_ uas_stop_TrpA1_ FruFLP5_male alone		Double wing extend	12	26.3486	600
TrpB3_A7	30_DIPtheta_ uas_stop_TrpA1_ FruFLP6_male alone	Wing flutter ~150	Double wing extend	0	0	600
TrpB3_B6	30_DIPtheta_ uas_stop_TrpA1_ FruFLP7_male alone		Double wing extend	0	0	600
TrpB3_E6	30_DIPtheta_ uas_stop_TrpA1_ FruFLP8_male alone		Double wing extend	0	0	600
TrpB3_M1	30_DIPtheta_ uas_stop_TrpA1_ FruFLP9_male alone		Double wing extend	0	0	600
TrpB3_L8	30_DIPzeta_ uas_stop_TrpA1_ FruFLP1_male alone		Double wing extend	0	0	600
TrpB3_C7	30_DIPzeta_ uas_stop_TrpA1_ FruFLP10_male alone		Double wing extend	0	0	600
TrpB3_L2	30_DIPzeta_ uas_stop_TrpA1_ FruFLP2_male alone		Double wing extend	0	0	600
TrpB3_D3	30_DIPzeta_ uas_stop_TrpA1_ FruFLP3_male alone		Double wing extend	0	0	600
TrpB3_H4	30_DIPzeta_ uas_stop_TrpA1_ FruFLP4_male alone		Double wing extend	0	0	600
TrpB3_C3	30_DIPzeta_ uas_stop_TrpA1_ FruFLP5_male alone		Double wing extend	0	0	600
TrpB3_C1	30_DIPzeta_ uas_stop_TrpA1_ FruFLP6_male alone		Double wing extend	0	0	600
TrpB3_B2	30_DIPzeta_ uas_stop_TrpA1_ FruFLP7_male alone		Double wing extend	0	0	600
TrpB3_D5	30_DIPzeta_ uas_stop_TrpA1_ FruFLP8_male alone		Double wing extend	0	0	600
TrpB3_D9	30_DIPzeta_ uas_stop_TrpA1_ FruFLP9_male alone		Double wing extend	0	0	600
TrpB4_G6	30_dpr1_ uas_stop_TrpA1_ FruFLP1_male alone		Double wing extend	33	512.576	600
TrpB4_H7	30_dpr1_ uas_stop_TrpA1_ FruFLP10_male alone		Double wing extend	24	24.5465	600
TrpB4_B6	30_dpr1_ uas_stop_TrpA1_ FruFLP2_male alone		Double wing extend	14	399.086	592.998
TrpB4_L8	30_dpr1_ uas_stop_TrpA1_ FruFLP3_male alone	loss of righting reflex. I think the wing ext. is throwing him off balance	Double wing extend	2	594.932	600
TrpB4_M2	30_dpr1_ uas_stop_TrpA1_ FruFLP4_male alone		Double wing extend	2	598.927	600
TrpB4_K8	30_dpr1_ uas_stop_TrpA1_ FruFLP5_male alone	weird "bucking" beahvior ~302	Double wing extend	4	4.91278	600
TrpB4_L6	30_dpr1_ uas_stop_TrpA1_ FruFLP6_male alone	a lot of head rubbing	Double wing extend	30	249.96	589.598
TrpB4_C5	30_dpr1_ uas_stop_TrpA1_ FruFLP7_male alone	abdomen bobbing - but does stop	Double wing extend	0	0	600
TrpB4_G2	30_dpr1_ uas_stop_TrpA1_ FruFLP8_male alone		Double wing extend	40	128.938	600
TrpB4_H6	30_dpr1_ uas_stop_TrpA1_ FruFLP9_male alone		Double wing extend	0	0	600
TrpB1_D4	30_dpr10_gal4, uas_stop_Trpa1, FruFLP_male alone 1		Double wing extend	1	1.176	600
TrpB1_G4	30_dpr10_gal4, uas_stop_Trpa1, FruFLP_male alone 10		Double wing extend	0	0	600
TrpB1_K3	30_dpr10_gal4, uas_stop_Trpa1, FruFLP_male alone 2		Double wing extend	17	345.735	600
TrpB1_L2	30_dpr10_gal4, uas_stop_Trpa1, FruFLP_male alone 3		Double wing extend	0	0	600
TrpB1_C9	30_dpr10_gal4, uas_stop_Trpa1, FruFLP_male alone 4		Double wing extend	12	29.979	600
TrpB1_H8	30_dpr10_gal4, uas_stop_Trpa1, FruFLP_male alone 5		Double wing extend	31	195.287	600
TrpB1_E8	30_dpr10_gal4, uas_stop_Trpa1, FruFLP_male alone 6		Double wing extend	5	117.719	600
TrpB1_B9	30_dpr10_gal4, uas_stop_Trpa1, FruFLP_male alone 8		Double wing extend	2	598.109	600
TrpB1_M4	30_dpr10_gal4, uas_stop_Trpa1, FruFLP_male alone 8		Double wing extend	44	277.089	600
TrpB1_J2	30_dpr10_gal4, uas_stop_Trpa1, FruFLP_male alone 9		Double wing extend	21	533.685	600
TrpB1_E6	30_dpr11_gal4, uas_stop_Trpa1, FruFLP1_male alone		Double wing extend	1	598.978	600
TrpB1_H7	30_dpr11_gal4, uas_stop_Trpa1, FruFLP10_male alone		Double wing extend	6	567.998	600
TrpB1_D1	30_dpr11_gal4, uas_stop_Trpa1, FruFLP2_male alone		Double wing extend	16	550.953	600
TrpB1_H1	30_dpr11_gal4, uas_stop_Trpa1, FruFLP3_male alone		Double wing extend	1	557.453	595.33
TrpB1_G2	30_dpr11_gal4, uas_stop_Trpa1, FruFLP4_male alone		Double wing extend	1	598.76	600
TrpB1_M3	30_dpr11_gal4, uas_stop_Trpa1, FruFLP5_male alone		Double wing extend	3	588.739	600
TrpB1_K4	30_dpr11_gal4, uas_stop_Trpa1, FruFLP6_male alone		Double wing extend	30	496.235	600
TrpB1_B5	30_dpr11_gal4, uas_stop_Trpa1, FruFLP7_male alone		Double wing extend	2	598.276	600
TrpB1_E4	30_dpr11_gal4, uas_stop_Trpa1, FruFLP8_male alone		Double wing extend	1	597.606	600
TrpB1_L8	30_dpr11_gal4, uas_stop_Trpa1, FruFLP9_male alone		Double wing extend	35	483.459	600
TrpB1_B7	30_dpr12_gal4, uas_stop_Trpa1, FruFLP_male alone 1		Double wing extend	7	24.982	600
TrpB2_B1	30_dpr12_gal4, uas_stop_Trpa1, FruFLP_male alone 10		Double wing extend	9	389.14	600
TrpB1_F4	30_dpr12_gal4, uas_stop_Trpa1, FruFLP_male alone 2		Double wing extend	22	313.145	600
TrpB1_C8	30_dpr12_gal4, uas_stop_Trpa1, FruFLP_male alone 4	ejaculation ~489	Double wing extend	29	163.752	600
TrpB1_M5	30_dpr12_gal4, uas_stop_Trpa1, FruFLP_male alone 4	ejaculation ~489	Double wing extend	20	167.356	600
TrpB1_L5	30_dpr12_gal4, uas_stop_Trpa1, FruFLP_male alone 5		Double wing extend	36	259.581	600
TrpB2_F5	30_dpr12_gal4, uas_stop_Trpa1, FruFLP_male alone 6		Double wing extend	1	599.07	600
TrpB2_E5	30_dpr12_gal4, uas_stop_Trpa1, FruFLP_male alone 7	ejaculation ~259	Double wing extend	18	380.894	600
TrpB2_K2	30_dpr12_gal4, uas_stop_Trpa1, FruFLP_male alone 8		Double wing extend	27	278.243	600
TrpB2_K8	30_dpr12_gal4, uas_stop_Trpa1, FruFLP_male alone 9	ejaculation ~126	Double wing extend	16	204.542	600
TrpB5_M8	30_dpr14_ uas_stop_TrpA1_ FruFLP1_male alone	in the 1st 2/3rds of video, fly was positioned in such a way that it was difficult to see the abdomen but it appeared as though fly was rubbing external genitalia a bunch	Double wing extend	21	55.779	600
TrpB5_E3	30_dpr14_ uas_stop_TrpA1_ FruFLP10_male alone		Double wing extend	2	1.393	600
TrpB5_C8	30_dpr14_ uas_stop_TrpA1_ FruFLP2_male alone		Double wing extend	39	243.287	600
TrpB5_G6	30_dpr14_ uas_stop_TrpA1_ FruFLP3_male alone	wing fluttering,, not as far as extension	Double wing extend	25	564.774	600
TrpB5_F7	30_dpr14_ uas_stop_TrpA1_ FruFLP4_male alone	more wing fluttering less ext.	Double wing extend	3	142.407	600
TrpB5_B6	30_dpr14_ uas_stop_TrpA1_ FruFLP5_male alone		Double wing extend	11	179.308	600
TrpB5_A3	30_dpr14_ uas_stop_TrpA1_ FruFLP6_male alone		Double wing extend	25	365.492	600
TrpB5_D8	30_dpr14_ uas_stop_TrpA1_ FruFLP7_male alone		Double wing extend	37	169.788	600
TrpB5_K5	30_dpr14_ uas_stop_TrpA1_ FruFLP8_male alone	ejaculation~ 65?	Double wing extend	3	572.112	600
TrpB5_E8	30_dpr14_ uas_stop_TrpA1_ FruFLP9_male alone		Double wing extend	4	549.276	600
TrpB3_G5	30_dpr15_ uas_stop_TrpA1_ FruFLP1_male alone		Double wing extend	13	418.443	600
TrpB3_K5	30_dpr15_ uas_stop_TrpA1_ FruFLP10_male alone	Definitely vibrating wing but not extending very far	Double wing extend	6	163.004	600
TrpB3_K4	30_dpr15_ uas_stop_TrpA1_ FruFLP2_male alone		Double wing extend	0	0	600
TrpB3_B8	30_dpr15_ uas_stop_TrpA1_ FruFLP3_male alone		Double wing extend	19	480.847	600
TrpB3_D6	30_dpr15_ uas_stop_TrpA1_ FruFLP4_male alone		Double wing extend	37	107.371	600
TrpB3_K2	30_dpr15_ uas_stop_TrpA1_ FruFLP5_male alone		Double wing extend	2	571.771	600
TrpB3_G9	30_dpr15_ uas_stop_TrpA1_ FruFLP6_male alone		Double wing extend	7	573.652	600
TrpB3_J8	30_dpr15_ uas_stop_TrpA1_ FruFLP7_male alone		Double wing extend	8	511.929	600
TrpB3_G7	30_dpr15_ uas_stop_TrpA1_ FruFLP8_male alone		Double wing extend	18	475.281	600
TrpB3_F6	30_dpr15_ uas_stop_TrpA1_ FruFLP9_male alone	Can't tell if wings stuck out or dbl wing ext.	Double wing extend	2	20.343	600
TrpB3_A5	30_dpr16_ uas_stop_TrpA1_ FruFLP1_male alone		Double wing extend	0	0	600
TrpB3_K6	30_dpr16_ uas_stop_TrpA1_ FruFLP10_male alone		Double wing extend	0	0	600
TrpB3_B3	30_dpr16_ uas_stop_TrpA1_ FruFLP2_male alone		Double wing extend	0	0	600
TrpB3_L1	30_dpr16_ uas_stop_TrpA1_ FruFLP3_male alone		Double wing extend	0	0	600
TrpB3_G2	30_dpr16_ uas_stop_TrpA1_ FruFLP4_male alone		Double wing extend	6	2.446	600
TrpB3_L3	30_dpr16_ uas_stop_TrpA1_ FruFLP5_male alone		Double wing extend	0	0	600
TrpB3_H1	30_dpr16_ uas_stop_TrpA1_ FruFLP6_male alone		Double wing extend	3	17.4412	600
TrpB3_G6	30_dpr16_ uas_stop_TrpA1_ FruFLP7_male alone		Double wing extend	30	72.646	600
TrpB3_J1	30_dpr16_ uas_stop_TrpA1_ FruFLP8_male alone		Double wing extend	0	0	600
TrpB3_A9	30_dpr16_ uas_stop_TrpA1_ FruFLP9_male alone		Double wing extend	0	0	600
TrpB1_A4	30_dpr17_gal4, uas_stop_Trpa1, FruFLP1_male alone		Double wing extend	0	0	600
TrpB1_F5	30_dpr17_gal4, uas_stop_Trpa1, FruFLP10_male alone		Double wing extend	0	0	600
TrpB1_E7	30_dpr17_gal4, uas_stop_Trpa1, FruFLP2_male alone		Double wing extend	0	0	600
TrpB1_M1	30_dpr17_gal4, uas_stop_Trpa1, FruFLP3_male alone		Double wing extend	0	0	600
TrpB1_F6	30_dpr17_gal4, uas_stop_Trpa1, FruFLP4_male alone		Double wing extend	0	0	600
TrpB1_F2	30_dpr17_gal4, uas_stop_Trpa1, FruFLP5_male alone		Double wing extend	0	0	600
TrpB1_B4	30_dpr17_gal4, uas_stop_Trpa1, FruFLP6_male alone		Double wing extend	0	0	600
TrpB1_C6	30_dpr17_gal4, uas_stop_Trpa1, FruFLP7_male alone		Double wing extend	0	0	600
TrpB1_J8	30_dpr17_gal4, uas_stop_Trpa1, FruFLP8_male alone		Double wing extend	0	0	600
TrpB1_B2	30_dpr17_gal4, uas_stop_Trpa1, FruFLP9_male alone		Double wing extend	0	0	600
TrpB4_K1	30_dpr18_ uas_stop_TrpA1_ FruFLP1_male alone		Double wing extend	30	213.765	600
TrpB4_H9	30_dpr18_ uas_stop_TrpA1_ FruFLP10_male alone		Double wing extend	0	0	600
TrpB4_F5	30_dpr18_ uas_stop_TrpA1_ FruFLP2_male alone	less wing extension more wing vibration	Double wing extend	8	6.286	600
TrpB4_E6	30_dpr18_ uas_stop_TrpA1_ FruFLP3_male alone		Double wing extend	25	122.597	600
TrpB4_J5	30_dpr18_ uas_stop_TrpA1_ FruFLP4_male alone		Double wing extend	4	588.006	600
TrpB4_J6	30_dpr18_ uas_stop_TrpA1_ FruFLP5_male alone		Double wing extend	4	141.564	600
TrpB4_F2	30_dpr18_ uas_stop_TrpA1_ FruFLP6_male alone		Double wing extend	5	277.059	600
TrpB4_L5	30_dpr18_ uas_stop_TrpA1_ FruFLP7_male alone		Double wing extend	73	365.377	600
TrpB4_E4	30_dpr18_ uas_stop_TrpA1_ FruFLP8_male alone		Double wing extend	8	587.03	600
TrpB4_D2	30_dpr18_ uas_stop_TrpA1_ FruFLP9_male alone		Double wing extend	9	63.581	600
TrpB1_F8	30_dpr2_gal4, uas_stop_Trpa1, FruFLP1_male alone		Double wing extend	3	31.7465	600
TrpB1_L3	30_dpr2_gal4, uas_stop_Trpa1, FruFLP10_male alone		Double wing extend	4	8.14	600
TrpB1_K9	30_dpr2_gal4, uas_stop_Trpa1, FruFLP2_male alone		Double wing extend	0	0	600
TrpB1_H9	30_dpr2_gal4, uas_stop_Trpa1, FruFLP3_male alone		Double wing extend	0	0	600
TrpB1_K1	30_dpr2_gal4, uas_stop_Trpa1, FruFLP4_male alone		Double wing extend	20	377.607	600
TrpB1_E9	30_dpr2_gal4, uas_stop_Trpa1, FruFLP5_male alone		Double wing extend	0	0	600
TrpB1_F3	30_dpr2_gal4, uas_stop_Trpa1, FruFLP6_male alone		Double wing extend	0	0	600
TrpB1_G7	30_dpr2_gal4, uas_stop_Trpa1, FruFLP7_male alone	Funny jerky movements. Also loss of righting	Double wing extend	26	305.28	600
TrpB1_A5	30_dpr2_gal4, uas_stop_Trpa1, FruFLP8_male alone		Double wing extend	0	0	600
TrpB1_F7	30_dpr2_gal4, uas_stop_Trpa1, FruFLP9_male alone		Double wing extend	0	0	600
TrpB2_A8	30_dpr3_ uas_stop_TrpA1_ FruFLP1_male alone		Double wing extend	0	0	600
TrpB2_A2	30_dpr3_ uas_stop_TrpA1_ FruFLP10_male alone		Double wing extend	0	0	600
TrpB2_E4	30_dpr3_ uas_stop_TrpA1_ FruFLP2_male alone		Double wing extend	0	0	600
TrpB2_G2	30_dpr3_ uas_stop_TrpA1_ FruFLP3_male alone		Double wing extend	1	1.045	600
TrpB2_K6	30_dpr3_ uas_stop_TrpA1_ FruFLP4_male alone		Double wing extend	1	0.399906	600
TrpB2_E8	30_dpr3_ uas_stop_TrpA1_ FruFLP5_male alone		Double wing extend	0	0	600
TrpB2_C9	30_dpr3_ uas_stop_TrpA1_ FruFLP6_male alone		Double wing extend	0	0	600
TrpB2_D6	30_dpr3_ uas_stop_TrpA1_ FruFLP7_male alone		Double wing extend	0	0	600
TrpB2_L1	30_dpr3_ uas_stop_TrpA1_ FruFLP8_male alone		Double wing extend	0	0	600
TrpB2_F1	30_dpr3_ uas_stop_TrpA1_ FruFLP9_male alone		Double wing extend	0	0	600
TrpB5_F1	30_dpr4_ uas_stop_TrpA1_ FruFLP1_male alone		Double wing extend	8	100.687	600
TrpB5_M5	30_dpr4_ uas_stop_TrpA1_ FruFLP10_male alone		Double wing extend	0	0	600
TrpB5_B4	30_dpr4_ uas_stop_TrpA1_ FruFLP2_male alone		Double wing extend	4	551.021	600
TrpB5_M4	30_dpr4_ uas_stop_TrpA1_ FruFLP3_male alone		Double wing extend	13	429.518	600
TrpB5_E4	30_dpr4_ uas_stop_TrpA1_ FruFLP4_male alone		Double wing extend	6	147.795	600
TrpB5_K1	30_dpr4_ uas_stop_TrpA1_ FruFLP5_male alone		Double wing extend	9	10.175	600
TrpB5_J6	30_dpr4_ uas_stop_TrpA1_ FruFLP6_male alone		Double wing extend	28	535.34	600
TrpB5_A2	30_dpr4_ uas_stop_TrpA1_ FruFLP7_male alone	more wing fluttering less ext.	Double wing extend	9	582.183	600
TrpB5_N6	30_dpr4_ uas_stop_TrpA1_ FruFLP8_male alone		Double wing extend	29	401.744	600
TrpB5_A1	30_dpr4_ uas_stop_TrpA1_ FruFLP9_male alone	loss of righting-- more wing fluttering less of ext.	Double wing extend	41	239.755	600
TrpB4_K3	30_dpr5_ uas_stop_TrpA1_ FruFLP1_male alone	ejaculation ~62	Double wing extend	1	598.165	600
TrpB4_G7	30_dpr5_ uas_stop_TrpA1_ FruFLP10_male alone	ejaculation ~55, does not ext wings far but they are vibrating	Double wing extend	8	509.662	600
TrpB4_L4	30_dpr5_ uas_stop_TrpA1_ FruFLP2_male alone		Double wing extend	7	593.565	599.33
TrpB4_F6	30_dpr5_ uas_stop_TrpA1_ FruFLP3_male alone		Double wing extend	5	512.853	600
TrpB4_A9	30_dpr5_ uas_stop_TrpA1_ FruFLP4_male alone	wing vibrations but not so much extension	Double wing extend	5	397.412	600
TrpB4_M6	30_dpr5_ uas_stop_TrpA1_ FruFLP5_male alone	ejaculation ~ 75/80?	Double wing extend	11	560.61	600
TrpB4_E1	30_dpr5_ uas_stop_TrpA1_ FruFLP6_male alone		Double wing extend	42	277.996	600
TrpB4_D4	30_dpr5_ uas_stop_TrpA1_ FruFLP7_male alone	ejaculation ~185 more wing vibration less extension	Double wing extend	8	556.375	600
TrpB4_C8	30_dpr5_ uas_stop_TrpA1_ FruFLP8_male alone	ejaculation ~75? Again ~145	Double wing extend	5	521.195	600
TrpB4_A8	30_dpr5_ uas_stop_TrpA1_ FruFLP9_male alone		Double wing extend	6	507.725	600
TrpB5_M6	30_dpr6_ uas_stop_TrpA1_ FruFLP1_male alone		Double wing extend	0	0	600
TrpB5_J2	30_dpr6_ uas_stop_TrpA1_ FruFLP10_male alone		Double wing extend	0	0	600
TrpB5_M7	30_dpr6_ uas_stop_TrpA1_ FruFLP2_male alone		Double wing extend	0	0	600
TrpB5_G3	30_dpr6_ uas_stop_TrpA1_ FruFLP3_male alone		Double wing extend	2	8.23327	600
TrpB5_J9	30_dpr6_ uas_stop_TrpA1_ FruFLP4_male alone		Double wing extend	0	0	600
TrpB5_G1	30_dpr6_ uas_stop_TrpA1_ FruFLP5_male alone		Double wing extend	3	0.803	600
TrpB5_J8	30_dpr6_ uas_stop_TrpA1_ FruFLP6_male alone		Double wing extend	0	0	600
TrpB5_D2	30_dpr6_ uas_stop_TrpA1_ FruFLP7_male alone		Double wing extend	0	0	600
TrpB5_L5	30_dpr6_ uas_stop_TrpA1_ FruFLP8_male alone		Double wing extend	0	0	600
TrpB5_J4	30_dpr6_ uas_stop_TrpA1_ FruFLP9_male alone		Double wing extend	1	0.517	600
TrpB4_D3	30_dpr8_ uas_stop_TrpA1_ FruFLP1_male alone		Double wing extend	0	0	600
TrpB4_K6	30_dpr8_ uas_stop_TrpA1_ FruFLP10_male alone		Double wing extend	0	0	600
TrpB4_K4	30_dpr8_ uas_stop_TrpA1_ FruFLP2_male alone		Double wing extend	0	0	600
TrpB4_M4	30_dpr8_ uas_stop_TrpA1_ FruFLP3_male alone		Double wing extend	0	0	600
TrpB4_E7	30_dpr8_ uas_stop_TrpA1_ FruFLP4_male alone		Double wing extend	0	0	600
TrpB4_J2	30_dpr8_ uas_stop_TrpA1_ FruFLP5_male alone		Double wing extend	0	0	600
TrpB4_H3	30_dpr8_ uas_stop_TrpA1_ FruFLP6_male alone	sometimes flicks wings up very briefly. Not really an extension (ex. ~584)	Double wing extend	0	0	600
TrpB4_B5	30_dpr8_ uas_stop_TrpA1_ FruFLP7_male alone		Double wing extend	0	0	600
TrpB4_F3	30_dpr8_ uas_stop_TrpA1_ FruFLP8_male alone		Double wing extend	0	0	600
TrpB4_B1	30_dpr8_ uas_stop_TrpA1_ FruFLP9_male alone		Double wing extend	0	0	600
TrpB4_L9	30_dpr9_ uas_stop_TrpA1_ FruFLP1_male alone		Double wing extend	17	519.788	600
TrpB4_D9	30_dpr9_ uas_stop_TrpA1_ FruFLP10_male alone		Double wing extend	0	0	600
TrpB4_F8	30_dpr9_ uas_stop_TrpA1_ FruFLP2_male alone	ejaculation ~140	Double wing extend	0	0	600
TrpB4_C1	30_dpr9_ uas_stop_TrpA1_ FruFLP3_male alone	more than abdominal bending. Clearly thrusting	Double wing extend	59	293.307	600
TrpB4_A5	30_dpr9_ uas_stop_TrpA1_ FruFLP4_male alone		Double wing extend	6	577.477	600
TrpB4_D5	30_dpr9_ uas_stop_TrpA1_ FruFLP5_male alone		Double wing extend	0	0	600
TrpB4_J8	30_dpr9_ uas_stop_TrpA1_ FruFLP6_male alone		Double wing extend	2	1.398	600
TrpB4_G5	30_dpr9_ uas_stop_TrpA1_ FruFLP7_male alone		Double wing extend	15	6.285	600
TrpB4_M3	30_dpr9_ uas_stop_TrpA1_ FruFLP8_male alone	proboscis extensions b/w ~135 & 140-- didn’t really continue	Double wing extend	33	374.847	600
TrpB4_L1	30_dpr9_ uas_stop_TrpA1_ FruFLP9_male alone		Double wing extend	1	0.693	600
TrpB5_K4	30_FruFLP1_male alone		Double wing extend	0	0	600
TrpB5_N8	30_FruFLP10_male alone	ejaculation~ 100?	Double wing extend	2	2.758	600
TrpB5_C6	30_FruFLP2_male alone		Double wing extend	7	29.633	600
TrpB5_C1	30_FruFLP3_male alone		Double wing extend	1	0.549	600
TrpB5_E1	30_FruFLP4_male alone		Double wing extend	0	0	600
TrpB5_A7	30_FruFLP5_male alone		Double wing extend	0	0	600
TrpB5_K9	30_FruFLP6_male alone		Double wing extend	0	0	600
TrpB5_A6	30_FruFLP7_male alone	jerky movements	Double wing extend	0	0	600
TrpB5_C5	30_FruFLP8_male alone		Double wing extend	0	0	600
TrpB5_D4	30_FruFLP9_male alone		Double wing extend	0	0	600
TrpB5_A5	30_TrpA1_1_male alone		Double wing extend	4	127.066	600
TrpB5_K8	30_TrpA1_10_male alone		Double wing extend	0	0	600
TrpB5_E5	30_TrpA1_2_male alone		Double wing extend	0	0	600
TrpB5_C4	30_TrpA1_3_male alone		Double wing extend	7	13.219	600
TrpB5_C7	30_TrpA1_4_male alone		Double wing extend	0	0	600
TrpB5_L3	30_TrpA1_5_male alone		Double wing extend	0	0	600
TrpB5_A8	30_TrpA1_6_male alone	abdomen bobbing	Double wing extend	11	69.748	600
TrpB5_L1	30_TrpA1_7_male alone	jerky sideways walking-- wing seems offset but not extending or vibrating	Double wing extend	0	0	600
TrpB5_A9	30_TrpA1_8_male alone		Double wing extend	7	24.49	600
TrpB5_O2	30_TrpA1_9_male alone		Double wing extend	8	17.158	600
TrpB5_F4	20_CS1_male alone		Following	0	0	600
TrpB5_F2	20_CS10_male alone		Following	0	0	600
TrpB5_F3	20_CS2_male alone		Following	0	0	600
TrpB5_B8	20_CS3_male alone		Following	0	0	600
TrpB5_L4	20_CS4_male alone		Following	0	0	600
TrpB5_H9	20_CS5_male alone		Following	0	0	600
TrpB5_G4	20_CS6_male alone	proboscis ext. ~280	Following	0	0	600
TrpB5_M9	20_CS7_male alone		Following	0	0	600
TrpB5_N2	20_CS8_male alone		Following	0	0	600
TrpB5_K2	20_CS9_male alone	proboscis ext. ex~145, 165, 210 & many more	Following	0	0	600
TrpB2_L7	20_DIPalpha_ uas_stop_TrpA1_ FruFLP1_male alone		Following	0	0	600
TrpB2_J8	20_DIPalpha_ uas_stop_TrpA1_ FruFLP10_male alone		Following	0	0	600
TrpB2_C1	20_DIPalpha_ uas_stop_TrpA1_ FruFLP2_male alone		Following	0	0	600
TrpB2_D2	20_DIPalpha_ uas_stop_TrpA1_ FruFLP3_male alone		Following	0	0	600
TrpB2_F8	20_DIPalpha_ uas_stop_TrpA1_ FruFLP4_male alone		Following	0	0	600
TrpB2_J1	20_DIPalpha_ uas_stop_TrpA1_ FruFLP5_male alone		Following	0	0	600
TrpB2_B2	20_DIPalpha_ uas_stop_TrpA1_ FruFLP6_male alone		Following	0	0	600
TrpB2_G7	20_DIPalpha_ uas_stop_TrpA1_ FruFLP7_male alone		Following	0	0	600
TrpB2_D3	20_DIPalpha_ uas_stop_TrpA1_ FruFLP8_male alone		Following	0	0	600
TrpB2_A6	20_DIPalpha_ uas_stop_TrpA1_ FruFLP9_male alone		Following	0	0	600
TrpB1_D6	20_DIPbeta_gal4, uas_stop_Trpa1, FruFLP1_male alone		Following	0	0	600
TrpB1_J9	20_DIPbeta_gal4, uas_stop_Trpa1, FruFLP10_male alone		Following	0	0	600
TrpB1_L6	20_DIPbeta_gal4, uas_stop_Trpa1, FruFLP2_male alone		Following	0	0	600
TrpB1_K8	20_DIPbeta_gal4, uas_stop_Trpa1, FruFLP3_male alone		Following	0	0	600
TrpB1_A7	20_DIPbeta_gal4, uas_stop_Trpa1, FruFLP4_male alone		Following	0	0	600
TrpB1_E3	20_DIPbeta_gal4, uas_stop_Trpa1, FruFLP5_male alone		Following	0	0	600
TrpB1_F9	20_DIPbeta_gal4, uas_stop_Trpa1, FruFLP6_male alone		Following	0	0	600
TrpB1_E2	20_DIPbeta_gal4, uas_stop_Trpa1, FruFLP7_male alone		Following	0	0	600
TrpB1_G6	20_DIPbeta_gal4, uas_stop_Trpa1, FruFLP8_male alone		Following	0	0	600
TrpB1_A2	20_DIPbeta_gal4, uas_stop_Trpa1, FruFLP9_male alone		Following	0	0	600
TrpB3_D2	20_DIPdelta_ uas_stop_TrpA1_ FruFLP1_male alone		Following	0	0	600
TrpB3_C5	20_DIPdelta_ uas_stop_TrpA1_ FruFLP10_male alone	Loss of righting--starts early	Following	0	0	600
TrpB3_H2	20_DIPdelta_ uas_stop_TrpA1_ FruFLP2_male alone		Following	0	0	600
TrpB3_K7	20_DIPdelta_ uas_stop_TrpA1_ FruFLP3_male alone		Following	0	0	600
TrpB3_E3	20_DIPdelta_ uas_stop_TrpA1_ FruFLP4_male alone		Following	0	0	600
TrpB3_E1	20_DIPdelta_ uas_stop_TrpA1_ FruFLP5_male alone	head rubbing-abdomen bobbing?	Following	0	0	600
TrpB3_C9	20_DIPdelta_ uas_stop_TrpA1_ FruFLP6_male alone	Lots of head rubbing	Following	0	0	600
TrpB3_A4	20_DIPdelta_ uas_stop_TrpA1_ FruFLP7_male alone		Following	0	0	600
TrpB3_M5	20_DIPdelta_ uas_stop_TrpA1_ FruFLP8_male alone		Following	0	0	600
TrpB3_H5	20_DIPdelta_ uas_stop_TrpA1_ FruFLP9_male alone		Following	0	0	600
TrpB2_H9	20_DIPepsilon_ uas_stop_TrpA1_ FruFLP1_male alone	Abdomen bobbing? Hard to tell. More in the beginning	Following	0	0	600
TrpB2_M5	20_DIPepsilon_ uas_stop_TrpA1_ FruFLP10_male alone		Following	0	0	600
TrpB2_E6	20_DIPepsilon_ uas_stop_TrpA1_ FruFLP2_male alone		Following	0	0	600
TrpB2_A5	20_DIPepsilon_ uas_stop_TrpA1_ FruFLP3_male alone		Following	0	0	600
TrpB2_G3	20_DIPepsilon_ uas_stop_TrpA1_ FruFLP4_male alone		Following	0	0	600
TrpB2_L8	20_DIPepsilon_ uas_stop_TrpA1_ FruFLP5_male alone		Following	0	0	600
TrpB2_D8	20_DIPepsilon_ uas_stop_TrpA1_ FruFLP6_male alone	Abdomen bobbing ~400	Following	0	0	600
TrpB2_C6	20_DIPepsilon_ uas_stop_TrpA1_ FruFLP7_male alone		Following	0	0	600
TrpB2_A7	20_DIPepsilon_ uas_stop_TrpA1_ FruFLP8_male alone		Following	0	0	600
TrpB2_B6	20_DIPepsilon_ uas_stop_TrpA1_ FruFLP9_male alone		Following	0	0	600
TrpB2_D4	20_DIPeta_ uas_stop_TrpA1_ FruFLP1_male alone		Following	0	0	600
TrpB2_K5	20_DIPeta_ uas_stop_TrpA1_ FruFLP10_male alone		Following	0	0	600
TrpB2_E1	20_DIPeta_ uas_stop_TrpA1_ FruFLP2_male alone		Following	0	0	600
TrpB2_F4	20_DIPeta_ uas_stop_TrpA1_ FruFLP3_male alone		Following	0	0	600
TrpB2_B3	20_DIPeta_ uas_stop_TrpA1_ FruFLP4_male alone		Following	0	0	600
TrpB2_D5	20_DIPeta_ uas_stop_TrpA1_ FruFLP5_male alone		Following	0	0	600
TrpB2_K9	20_DIPeta_ uas_stop_TrpA1_ FruFLP6_male alone		Following	0	0	600
TrpB2_H8	20_DIPeta_ uas_stop_TrpA1_ FruFLP7_male alone		Following	0	0	600
TrpB2_F6	20_DIPeta_ uas_stop_TrpA1_ FruFLP8_male alone		Following	0	0	600
TrpB2_H3	20_DIPeta_ uas_stop_TrpA1_ FruFLP9_male alone		Following	0	0	600
TrpB2_J7	20_DIPgamma_ uas_stop_TrpA1_ FruFLP1_male alone		Following	0	0	600
TrpB2_E3	20_DIPgamma_ uas_stop_TrpA1_ FruFLP10_male alone		Following	0	0	600
TrpB2_B5	20_DIPgamma_ uas_stop_TrpA1_ FruFLP2_male alone		Following	0	0	600
TrpB2_C5	20_DIPgamma_ uas_stop_TrpA1_ FruFLP3_male alone		Following	0	0	600
TrpB2_K7	20_DIPgamma_ uas_stop_TrpA1_ FruFLP4_male alone		Following	0	0	600
TrpB2_H6	20_DIPgamma_ uas_stop_TrpA1_ FruFLP5_male alone		Following	0	0	595.597
TrpB2_A4	20_DIPgamma_ uas_stop_TrpA1_ FruFLP6_male alone		Following	0	0	600
TrpB2_F2	20_DIPgamma_ uas_stop_TrpA1_ FruFLP7_male alone		Following	0	0	600
TrpB2_C7	20_DIPgamma_ uas_stop_TrpA1_ FruFLP8_male alone		Following	0	0	600
TrpB2_L9	20_DIPgamma_ uas_stop_TrpA1_ FruFLP9_male alone		Following	0	0	600
TrpB3_L6	20_DIPTheta_ uas_stop_TrpA1_ FruFLP1_male alone		Following	0	0	599.663
TrpB3_G3	20_DIPTheta_ uas_stop_TrpA1_ FruFLP10_male alone	Jerky movements	Following	0	0	600
TrpB3_K8	20_DIPTheta_ uas_stop_TrpA1_ FruFLP2_male alone		Following	0	0	600
TrpB3_G1	20_DIPTheta_ uas_stop_TrpA1_ FruFLP3_male alone	beginning spins in circles	Following	0	0	600
TrpB3_E8	20_DIPTheta_ uas_stop_TrpA1_ FruFLP4_male alone		Following	0	0	600
TrpB3_F2	20_DIPTheta_ uas_stop_TrpA1_ FruFLP5_male alone		Following	0	0	599.463
TrpB3_M6	20_DIPTheta_ uas_stop_TrpA1_ FruFLP6_male alone		Following	0	0	600
TrpB3_B5	20_DIPTheta_ uas_stop_TrpA1_ FruFLP7_male alone	Can't tell if wings stuck out or dbl wing ext. Clear proboscis extension happens ~507 but also before	Following	0	0	600
TrpB3_F9	20_DIPTheta_ uas_stop_TrpA1_ FruFLP8_male alone		Following	0	0	600
TrpB3_F4	20_DIPTheta_ uas_stop_TrpA1_ FruFLP9_male alone		Following	0	0	600
TrpB3_M3	20_DIPzeta_ uas_stop_TrpA1_ FruFLP1_male alone		Following	0	0	600
TrpB3_E5	20_DIPzeta_ uas_stop_TrpA1_ FruFLP10_male alone		Following	0	0	600
TrpB3_B4	20_DIPzeta_ uas_stop_TrpA1_ FruFLP2_male alone		Following	0	0	600
TrpB3_J5	20_DIPzeta_ uas_stop_TrpA1_ FruFLP3_male alone		Following	0	0	600
TrpB3_A1	20_DIPzeta_ uas_stop_TrpA1_ FruFLP4_male alone	Abdomen bobbing starting ~80	Following	0	0	600
TrpB3_E2	20_DIPzeta_ uas_stop_TrpA1_ FruFLP5_male alone		Following	0	0	600
TrpB3_G8	20_DIPzeta_ uas_stop_TrpA1_ FruFLP6_male alone		Following	0	0	600
TrpB3_D7	20_DIPzeta_ uas_stop_TrpA1_ FruFLP7_male alone		Following	0	0	600
TrpB3_J6	20_DIPzeta_ uas_stop_TrpA1_ FruFLP8_male alone		Following	0	0	600
TrpB3_A3	20_DIPzeta_ uas_stop_TrpA1_ FruFLP9_male alone	Short* bouts of loss of righting. Ex. ~185	Following	0	0	600
TrpB4_G9	20_dpr1_ uas_stop_TrpA1_ FruFLP1_male alone		Following	0	0	600
TrpB4_C3	20_dpr1_ uas_stop_TrpA1_ FruFLP10_male alone		Following	0	0	600
TrpB4_F1	20_dpr1_ uas_stop_TrpA1_ FruFLP2_male alone	abdomen bobbing ~400	Following	0	0	600
TrpB4_K2	20_dpr1_ uas_stop_TrpA1_ FruFLP3_male alone		Following	0	0	600
TrpB4_J7	20_dpr1_ uas_stop_TrpA1_ FruFLP4_male alone		Following	0	0	600
TrpB4_C4	20_dpr1_ uas_stop_TrpA1_ FruFLP5_male alone	Lots of head rubbing	Following	0	0	600
TrpB4_C7	20_dpr1_ uas_stop_TrpA1_ FruFLP6_male alone	lots of head and probocsis rubbing	Following	0	0	600
TrpB4_B7	20_dpr1_ uas_stop_TrpA1_ FruFLP7_male alone		Following	0	0	600
TrpB4_E5	20_dpr1_ uas_stop_TrpA1_ FruFLP8_male alone		Following	0	0	600
TrpB4_H2	20_dpr1_ uas_stop_TrpA1_ FruFLP9_male alone		Following	0	0	600
TrpB1_C2	20_dpr10_gal4, uas_stop_Trpa1, FruFLP_male alone 1		Following	0	0	600
TrpB1_A8	20_dpr10_gal4, uas_stop_Trpa1, FruFLP_male alone 10		Following	0	0	600
TrpB1_E1	20_dpr10_gal4, uas_stop_Trpa1, FruFLP_male alone 2		Following	0	0	600
TrpB1_J4	20_dpr10_gal4, uas_stop_Trpa1, FruFLP_male alone 3		Following	0	0	600
TrpB1_F1	20_dpr10_gal4, uas_stop_Trpa1, FruFLP_male alone 4		Following	0	0	600
TrpB1_D3	20_dpr10_gal4, uas_stop_Trpa1, FruFLP_male alone 5		Following	0	0	600
TrpB1_H5	20_dpr10_gal4, uas_stop_Trpa1, FruFLP_male alone 6		Following	0	0	600
TrpB1_D2	20_dpr10_gal4, uas_stop_Trpa1, FruFLP_male alone 7		Following	0	0	600
TrpB1_C1	20_dpr10_gal4, uas_stop_Trpa1, FruFLP_male alone 8		Following	0	0	600
TrpB1_E5	20_dpr10_gal4, uas_stop_Trpa1, FruFLP_male alone 9		Following	0	0	600
TrpB1_M2	20_dpr11_gal4, uas_stop_Trpa1, FruFL6P_male alone		Following	0	0	600
TrpB1_C3	20_dpr11_gal4, uas_stop_Trpa1, FruFLP1_male alone		Following	0	0	600
TrpB1_H4	20_dpr11_gal4, uas_stop_Trpa1, FruFLP10_male alone		Following	0	0	600
TrpB1_G3	20_dpr11_gal4, uas_stop_Trpa1, FruFLP2_male alone	Falls down a lot. Short bursts of loss of righting	Following	0	0	600
TrpB1_A3	20_dpr11_gal4, uas_stop_Trpa1, FruFLP3_male alone		Following	0	0	600
TrpB1_A9	20_dpr11_gal4, uas_stop_Trpa1, FruFLP4_male alone		Following	0	0	600
TrpB1_L7	20_dpr11_gal4, uas_stop_Trpa1, FruFLP5_male alone		Following	0	0	600
TrpB1_H2	20_dpr11_gal4, uas_stop_Trpa1, FruFLP7_male alone		Following	0	0	600
TrpB1_D8	20_dpr11_gal4, uas_stop_Trpa1, FruFLP8_male alone		Following	0	0	600
TrpB1_L4	20_dpr11_gal4, uas_stop_Trpa1, FruFLP9_male alone		Following	0	0	600
TrpB3_G4	20_dpr12_ uas_stop_TrpA1_ FruFLP1_male alone		Following	0	0	600
TrpB4_L3	20_dpr12_ uas_stop_TrpA1_ FruFLP10_male alone		Following	0	0	600
TrpB3_J4	20_dpr12_ uas_stop_TrpA1_ FruFLP2_male alone		Following	0	0	600
TrpB3_C4	20_dpr12_ uas_stop_TrpA1_ FruFLP3_male alone		Following	0	0	600
TrpB3_C2	20_dpr12_ uas_stop_TrpA1_ FruFLP4_male alone		Following	0	0	600
TrpB3_J7	20_dpr12_ uas_stop_TrpA1_ FruFLP5_male alone		Following	0	0	600
TrpB4_C6	20_dpr12_ uas_stop_TrpA1_ FruFLP6_male alone		Following	0	0	600
TrpB4_A3	20_dpr12_ uas_stop_TrpA1_ FruFLP7_male alone		Following	0	0	600
TrpB4_F7	20_dpr12_ uas_stop_TrpA1_ FruFLP8_male alone		Following	0	0	600
TrpB4_G1	20_dpr12_ uas_stop_TrpA1_ FruFLP9_male alone		Following	0	0	600
TrpB5_H5	20_dpr14_ uas_stop_TrpA1_ FruFLP1_male alone		Following	0	0	600
TrpB5_G7	20_dpr14_ uas_stop_TrpA1_ FruFLP10_male alone		Following	0	0	600
TrpB5_L6	20_dpr14_ uas_stop_TrpA1_ FruFLP2_male alone		Following	0	0	600
TrpB5_E7	20_dpr14_ uas_stop_TrpA1_ FruFLP3_male alone		Following	0	0	600
TrpB5_B7	20_dpr14_ uas_stop_TrpA1_ FruFLP4_male alone		Following	0	0	600
TrpB5_L9	20_dpr14_ uas_stop_TrpA1_ FruFLP5_male alone		Following	0	0	600
TrpB5_C3	20_dpr14_ uas_stop_TrpA1_ FruFLP6_male alone		Following	0	0	600
TrpB5_F6	20_dpr14_ uas_stop_TrpA1_ FruFLP7_male alone		Following	0	0	600
TrpB5_L2	20_dpr14_ uas_stop_TrpA1_ FruFLP8_male alone		Following	0	0	600
TrpB5_N7	20_dpr14_ uas_stop_TrpA1_ FruFLP9_male alone		Following	0	0	600
TrpB3_D8	20_dpr15_ uas_stop_TrpA1_ FruFLP1_male alone	abdomen bobbing	Following	0	0	600
TrpB3_C8	20_dpr15_ uas_stop_TrpA1_ FruFLP10_male alone	Lots of head rubbing	Following	0	0	600
TrpB3_H8	20_dpr15_ uas_stop_TrpA1_ FruFLP2_male alone		Following	0	0	600
TrpB3_B1	20_dpr15_ uas_stop_TrpA1_ FruFLP3_male alone		Following	0	0	600
TrpB3_A8	20_dpr15_ uas_stop_TrpA1_ FruFLP4_male alone		Following	0	0	600
TrpB3_J3	20_dpr15_ uas_stop_TrpA1_ FruFLP5_male alone		Following	0	0	600
TrpB3_H6	20_dpr15_ uas_stop_TrpA1_ FruFLP6_male alone		Following	0	0	600
TrpB3_L4	20_dpr15_ uas_stop_TrpA1_ FruFLP7_male alone		Following	0	0	600
TrpB3_B7	20_dpr15_ uas_stop_TrpA1_ FruFLP8_male alone		Following	0	0	600
TrpB3_F5	20_dpr15_ uas_stop_TrpA1_ FruFLP9_male alone		Following	0	0	600
TrpB3_C6	20_dpr16_ uas_stop_TrpA1_ FruFLP1_male alone	abdomen bobbing ~250	Following	0	0	600
TrpB3_F8	20_dpr16_ uas_stop_TrpA1_ FruFLP10_male alone	abdomen bobbing starting ~200	Following	0	0	600
TrpB3_M4	20_dpr16_ uas_stop_TrpA1_ FruFLP2_male alone		Following	0	0	600
TrpB3_H3	20_dpr16_ uas_stop_TrpA1_ FruFLP3_male alone		Following	0	0	600
TrpB3_K3	20_dpr16_ uas_stop_TrpA1_ FruFLP4_male alone	Lots of head rubbing	Following	0	0	600
TrpB3_H7	20_dpr16_ uas_stop_TrpA1_ FruFLP5_male alone		Following	0	0	600
TrpB3_B9	20_dpr16_ uas_stop_TrpA1_ FruFLP6_male alone	Proboscis ext. Rubs head constantly	Following	0	0	600
TrpB3_K9	20_dpr16_ uas_stop_TrpA1_ FruFLP7_male alone		Following	0	0	600
TrpB3_D4	20_dpr16_ uas_stop_TrpA1_ FruFLP8_male alone		Following	0	0	600
TrpB3_L9	20_dpr16_ uas_stop_TrpA1_ FruFLP9_male alone		Following	0	0	600
TrpB1_H3	20_dpr17_gal4, uas_stop_Trpa1, FruFLP1_male alone		Following	0	0	600
TrpB1_K2	20_dpr17_gal4, uas_stop_Trpa1, FruFLP10_male alone		Following	0	0	600
TrpB1_L9	20_dpr17_gal4, uas_stop_Trpa1, FruFLP2_male alone	Backwards walking. Abdomen bobbing.	Following	0	0	600
TrpB1_J7	20_dpr17_gal4, uas_stop_Trpa1, FruFLP3_male alone		Following	0	0	600
TrpB1_D9	20_dpr17_gal4, uas_stop_Trpa1, FruFLP4_male alone		Following	0	0	600
TrpB1_B6	20_dpr17_gal4, uas_stop_Trpa1, FruFLP5_male alone		Following	0	0	600
TrpB1_J1	20_dpr17_gal4, uas_stop_Trpa1, FruFLP6_male alone		Following	0	0	600
TrpB1_C4	20_dpr17_gal4, uas_stop_Trpa1, FruFLP7_male alone		Following	0	0	600
TrpB1_A6	20_dpr17_gal4, uas_stop_Trpa1, FruFLP8_male alone		Following	0	0	600
TrpB1_K5	20_dpr17_gal4, uas_stop_Trpa1, FruFLP9_male alone		Following	0	0	600
TrpB4_E8	20_dpr18_ uas_stop_TrpA1_ FruFLP1_male alone	lots of proboscis/head rubbing. Probsocis ext.	Following	0	0	600
TrpB4_G8	20_dpr18_ uas_stop_TrpA1_ FruFLP10_male alone		Following	0	0	600
TrpB4_K7	20_dpr18_ uas_stop_TrpA1_ FruFLP2_male alone		Following	0	0	600
TrpB4_A4	20_dpr18_ uas_stop_TrpA1_ FruFLP3_male alone		Following	0	0	600
TrpB4_H4	20_dpr18_ uas_stop_TrpA1_ FruFLP4_male alone		Following	0	0	600
TrpB4_G3	20_dpr18_ uas_stop_TrpA1_ FruFLP5_male alone		Following	0	0	600
TrpB4_D1	20_dpr18_ uas_stop_TrpA1_ FruFLP6_male alone		Following	0	0	600
TrpB4_D7	20_dpr18_ uas_stop_TrpA1_ FruFLP7_male alone		Following	0	0	600
TrpB4_A1	20_dpr18_ uas_stop_TrpA1_ FruFLP8_male alone		Following	0	0	600
TrpB4_C2	20_dpr18_ uas_stop_TrpA1_ FruFLP9_male alone		Following	0	0	600
TrpB1_K7	20_dpr2_gal4, uas_stop_Trpa1, FruFLP1_male alone		Following	0	0	600
TrpB1_G5	20_dpr2_gal4, uas_stop_Trpa1, FruFLP10_male alone		Following	0	0	600
TrpB1_D7	20_dpr2_gal4, uas_stop_Trpa1, FruFLP2_male alone		Following	0	0	600
TrpB1_C5	20_dpr2_gal4, uas_stop_Trpa1, FruFLP3_male alone		Following	0	0	600
TrpB1_M6	20_dpr2_gal4, uas_stop_Trpa1, FruFLP4_male alone		Following	0	0	600
TrpB1_C7	20_dpr2_gal4, uas_stop_Trpa1, FruFLP5_male alone		Following	0	0	600
TrpB1_L1	20_dpr2_gal4, uas_stop_Trpa1, FruFLP6_male alone		Following	0	0	600
TrpB1_J3	20_dpr2_gal4, uas_stop_Trpa1, FruFLP7_male alone		Following	0	0	600
TrpB1_J5	20_dpr2_gal4, uas_stop_Trpa1, FruFLP8_male alone		Following	0	0	600
TrpB1_K6	20_dpr2_gal4, uas_stop_Trpa1, FruFLP9_male alone		Following	0	0	600
TrpB2_D9	20_dpr3_ uas_stop_TrpA1_ FruFLP1_male alone	Abdomen bobbing ~200	Following	0	0	600
TrpB2_G5	20_dpr3_ uas_stop_TrpA1_ FruFLP10_male alone		Following	0	0	600
TrpB2_M4	20_dpr3_ uas_stop_TrpA1_ FruFLP2_male alone		Following	0	0	600
TrpB2_G9	20_dpr3_ uas_stop_TrpA1_ FruFLP3_male alone		Following	0	0	600
TrpB2_J9	20_dpr3_ uas_stop_TrpA1_ FruFLP4_male alone		Following	0	0	600
TrpB2_J3	20_dpr3_ uas_stop_TrpA1_ FruFLP5_male alone		Following	0	0	600
TrpB2_L2	20_dpr3_ uas_stop_TrpA1_ FruFLP6_male alone		Following	0	0	600
TrpB2_J4	20_dpr3_ uas_stop_TrpA1_ FruFLP7_male alone		Following	0	0	600
TrpB2_C2	20_dpr3_ uas_stop_TrpA1_ FruFLP8_male alone		Following	0	0	600
TrpB2_F7	20_dpr3_ uas_stop_TrpA1_ FruFLP9_male alone		Following	0	0	600
TrpB5_B5	20_dpr4_ uas_stop_TrpA1_ FruFLP1_male alone	Jerky movements, falling, loss of righting, proboscis extension	Following	0	0	600
TrpB5_H4	20_dpr4_ uas_stop_TrpA1_ FruFLP10_male alone		Following	0	0	600
TrpB5_N5	20_dpr4_ uas_stop_TrpA1_ FruFLP2_male alone		Following	0	0	600
TrpB5_G2	20_dpr4_ uas_stop_TrpA1_ FruFLP3_male alone		Following	0	0	600
TrpB5_A4	20_dpr4_ uas_stop_TrpA1_ FruFLP4_male alone		Following	0	0	600
TrpB5_B9	20_dpr4_ uas_stop_TrpA1_ FruFLP5_male alone		Following	0	0	600
TrpB5_L7	20_dpr4_ uas_stop_TrpA1_ FruFLP6_male alone		Following	0	0	600
TrpB5_B3	20_dpr4_ uas_stop_TrpA1_ FruFLP7_male alone		Following	0	0	600
TrpB5_G5	20_dpr4_ uas_stop_TrpA1_ FruFLP8_male alone		Following	0	0	600
TrpB5_J3	20_dpr4_ uas_stop_TrpA1_ FruFLP9_male alone		Following	0	0	600
TrpB4_J4	20_dpr5_ uas_stop_TrpA1_ FruFLP1_male alone	abdomen bobbing	Following	0	0	600
TrpB4_B3	20_dpr5_ uas_stop_TrpA1_ FruFLP10_male alone		Following	0	0	600
TrpB4_K9	20_dpr5_ uas_stop_TrpA1_ FruFLP2_male alone		Following	0	0	600
TrpB4_J3	20_dpr5_ uas_stop_TrpA1_ FruFLP3_male alone		Following	0	0	600
TrpB4_F4	20_dpr5_ uas_stop_TrpA1_ FruFLP4_male alone		Following	0	0	600
TrpB4_A2	20_dpr5_ uas_stop_TrpA1_ FruFLP5_male alone		Following	0	0	600
TrpB4_A6	20_dpr5_ uas_stop_TrpA1_ FruFLP6_male alone	abdomen bobbing	Following	0	0	600
TrpB4_E3	20_dpr5_ uas_stop_TrpA1_ FruFLP7_male alone		Following	0	0	600
TrpB4_B8	20_dpr5_ uas_stop_TrpA1_ FruFLP8_male alone		Following	0	0	600
TrpB4_B9	20_dpr5_ uas_stop_TrpA1_ FruFLP9_male alone		Following	0	0	600
TrpB5_H7	20_dpr6_ uas_stop_TrpA1_ FruFLP1_male alone		Following	0	0	600
TrpB5_D7	20_dpr6_ uas_stop_TrpA1_ FruFLP10_male alone	lots of head rubbing	Following	0	0	600
TrpB5_K3	20_dpr6_ uas_stop_TrpA1_ FruFLP2_male alone		Following	0	0	600
TrpB5_J1	20_dpr6_ uas_stop_TrpA1_ FruFLP3_male alone		Following	0	0	600
TrpB5_F9	20_dpr6_ uas_stop_TrpA1_ FruFLP4_male alone		Following	0	0	600
TrpB5_N4	20_dpr6_ uas_stop_TrpA1_ FruFLP5_male alone	lots of head rubbing	Following	0	0	600
TrpB5_L8	20_dpr6_ uas_stop_TrpA1_ FruFLP6_male alone		Following	0	0	600
TrpB5_K7	20_dpr6_ uas_stop_TrpA1_ FruFLP7_male alone		Following	0	0	600
TrpB5_D6	20_dpr6_ uas_stop_TrpA1_ FruFLP8_male alone		Following	0	0	600
TrpB5_G8	20_dpr6_ uas_stop_TrpA1_ FruFLP9_male alone	short bursts of loss of righting	Following	0	0	600
TrpB4_C9	20_dpr8_ uas_stop_TrpA1_ FruFLP1_male alone	abdomen bobbing	Following	0	0	600
TrpB4_K5	20_dpr8_ uas_stop_TrpA1_ FruFLP10_male alone		Following	0	0	600
TrpB4_F9	20_dpr8_ uas_stop_TrpA1_ FruFLP2_male alone	abdomen bobbing, probsicis ext. ~415	Following	0	0	600
TrpB4_B4	20_dpr8_ uas_stop_TrpA1_ FruFLP3_male alone		Following	0	0	600
TrpB4_H5	20_dpr8_ uas_stop_TrpA1_ FruFLP4_male alone	abdomen bobbing	Following	0	0	600
TrpB4_E2	20_dpr8_ uas_stop_TrpA1_ FruFLP5_male alone		Following	0	0	600
TrpB4_J1	20_dpr8_ uas_stop_TrpA1_ FruFLP6_male alone		Following	0	0	600
TrpB4_D6	20_dpr8_ uas_stop_TrpA1_ FruFLP7_male alone		Following	0	0	600
TrpB4_J9	20_dpr8_ uas_stop_TrpA1_ FruFLP8_male alone		Following	0	0	600
TrpB4_L2	20_dpr8_ uas_stop_TrpA1_ FruFLP9_male alone		Following	0	0	600
TrpB4_E9	20_dpr9_gal4, uas_stop_Trpa1, FruFLP_male alone 1	Lots of head rubbing	Following	0	0	600
TrpB4_B2	20_dpr9_gal4, uas_stop_Trpa1, FruFLP_male alone 10		Following	0	0	600
TrpB4_H8	20_dpr9_gal4, uas_stop_Trpa1, FruFLP_male alone 2		Following	0	0	600
TrpB4_A7	20_dpr9_gal4, uas_stop_Trpa1, FruFLP_male alone 3		Following	0	0	600
TrpB4_G4	20_dpr9_gal4, uas_stop_Trpa1, FruFLP_male alone 4		Following	0	0	600
TrpB4_M5	20_dpr9_gal4, uas_stop_Trpa1, FruFLP_male alone 5		Following	0	0	600
TrpB4_D8	20_dpr9_gal4, uas_stop_Trpa1, FruFLP_male alone 6		Following	0	0	600
TrpB4_H1	20_dpr9_gal4, uas_stop_Trpa1, FruFLP_male alone 7		Following	0	0	600
TrpB4_M1	20_dpr9_gal4, uas_stop_Trpa1, FruFLP_male alone 8		Following	0	0	600
TrpB4_L7	20_dpr9_gal4, uas_stop_Trpa1, FruFLP_male alone 9		Following	0	0	600
TrpB5_H1	20_FruFLP1_male alone		Following	0	0	600
TrpB5_C2	20_FruFLP10_male alone		Following	0	0	600
TrpB5_M3	20_FruFLP2_male alone		Following	0	0	600
TrpB5_E2	20_FruFLP3_male alone		Following	0	0	600
TrpB5_F8	20_FruFLP4_male alone		Following	0	0	600
TrpB5_H6	20_FruFLP5_male alone		Following	0	0	600
TrpB5_D9	20_FruFLP6_male alone		Following	0	0	600
TrpB5_E6	20_FruFLP7_male alone		Following	0	0	600
TrpB5_H2	20_FruFLP8_male alone		Following	0	0	600
TrpB5_N3	20_FruFLP9_male alone		Following	0	0	600
TrpB5_J7	20_TrpA1_1_male alone		Following	0	0	600
TrpB5_E9	20_TrpA1_10_male alone		Following	0	0	600
TrpB5_N1	20_TrpA1_2_male alone		Following	0	0	600
TrpB5_O1	20_TrpA1_3_male alone		Following	0	0	600
TrpB5_F5	20_TrpA1_4_male alone	funny wings-- they look spread but not vibrating	Following	0	0	600
TrpB5_O3	20_TrpA1_5_male alone		Following	0	0	600
TrpB5_N9	20_TrpA1_6_male alone		Following	0	0	600
TrpB5_C9	20_TrpA1_7_male alone		Following	0	0	600
TrpB5_M1	20_TrpA1_8_male alone		Following	0	0	600
TrpB5_H3	20_TrpA1_9_male alone	jerky walking-- loss of righting	Following	0	0	600
TrpB5_H8	30_CS1_male alone		Following	0	0	600
TrpB5_J5	30_CS10_male alone		Following	0	0	600
TrpB5_B2	30_CS2_male alone		Following	0	0	600
TrpB5_M2	30_CS3_male alone		Following	0	0	600
TrpB5_K6	30_CS4_male alone		Following	0	0	600
TrpB5_G9	30_CS5_male alone		Following	0	0	600
TrpB5_D1	30_CS6_male alone		Following	0	0	600
TrpB5_D3	30_CS7_male alone		Following	0	0	600
TrpB5_D5	30_CS8_male alone		Following	0	0	600
TrpB5_B1	30_CS9_male alone		Following	0	0	600
TrpB2_K4	30_DIPalpha_ uas_stop_TrpA1_ FruFLP1_male alone		Following	0	0	600
TrpB2_J2	30_DIPalpha_ uas_stop_TrpA1_ FruFLP10_male alone		Following	0	0	600
TrpB2_C4	30_DIPalpha_ uas_stop_TrpA1_ FruFLP2_male alone		Following	0	0	600
TrpB2_J6	30_DIPalpha_ uas_stop_TrpA1_ FruFLP3_male alone		Following	0	0	600
TrpB2_C8	30_DIPalpha_ uas_stop_TrpA1_ FruFLP4_male alone		Following	0	0	600
TrpB2_D1	30_DIPalpha_ uas_stop_TrpA1_ FruFLP5_male alone		Following	0	0	600
TrpB2_F9	30_DIPalpha_ uas_stop_TrpA1_ FruFLP6_male alone		Following	0	0	600
TrpB2_B8	30_DIPalpha_ uas_stop_TrpA1_ FruFLP7_male alone	Very jerky. Leg extension?	Following	0	0	600
TrpB2_K1	30_DIPalpha_ uas_stop_TrpA1_ FruFLP8_male alone	Jerky/funny leg movements	Following	0	0	600
TrpB2_L3	30_DIPalpha_ uas_stop_TrpA1_ FruFLP9_male alone		Following	0	0	600
TrpB1_G1	30_DIPbeta_gal4, uas_stop_Trpa1, FruFLP1_male alone		Following	0	0	600
TrpB1_B8	30_DIPbeta_gal4, uas_stop_Trpa1, FruFLP10_male alone		Following	0	0	600
TrpB1_H6	30_DIPbeta_gal4, uas_stop_Trpa1, FruFLP2_male alone		Following	0	0	600
TrpB1_J6	30_DIPbeta_gal4, uas_stop_Trpa1, FruFLP3_male alone		Following	0	0	600
TrpB1_B1	30_DIPbeta_gal4, uas_stop_Trpa1, FruFLP4_male alone		Following	0	0	600
TrpB1_G9	30_DIPbeta_gal4, uas_stop_Trpa1, FruFLP5_male alone		Following	0	0	600
TrpB1_A1	30_DIPbeta_gal4, uas_stop_Trpa1, FruFLP6_male alone		Following	0	0	600
TrpB1_D5	30_DIPbeta_gal4, uas_stop_Trpa1, FruFLP7_male alone		Following	0	0	600
TrpB1_G8	30_DIPbeta_gal4, uas_stop_Trpa1, FruFLP8_male alone		Following	0	0	600
TrpB1_B3	30_DIPbeta_gal4, uas_stop_Trpa1, FruFLP9_male alone		Following	0	0	600
TrpB3_L5	30_DIPdelta_ uas_stop_TrpA1_ FruFLP1_male alone	Jerky walking ~200	Following	0	0	600
TrpB3_K1	30_DIPdelta_ uas_stop_TrpA1_ FruFLP10_male alone	abdomen bobbing	Following	0	0	600
TrpB3_E7	30_DIPdelta_ uas_stop_TrpA1_ FruFLP2_male alone		Following	0	0	600
TrpB3_H9	30_DIPdelta_ uas_stop_TrpA1_ FruFLP3_male alone		Following	0	0	600
TrpB3_F3	30_DIPdelta_ uas_stop_TrpA1_ FruFLP4_male alone		Following	0	0	600
TrpB3_J9	30_DIPdelta_ uas_stop_TrpA1_ FruFLP5_male alone		Following	0	0	600
TrpB3_J2	30_DIPdelta_ uas_stop_TrpA1_ FruFLP6_male alone		Following	0	0	600
TrpB3_E9	30_DIPdelta_ uas_stop_TrpA1_ FruFLP7_male alone		Following	0	0	600
TrpB3_F7	30_DIPdelta_ uas_stop_TrpA1_ FruFLP8_male alone		Following	0	0	600
TrpB3_D1	30_DIPdelta_ uas_stop_TrpA1_ FruFLP9_male alone		Following	0	0	600
TrpB2_M1	30_DIPepsilon_ uas_stop_TrpA1_ FruFLP1_male alone		Following	0	0	600
TrpB2_G6	30_DIPepsilon_ uas_stop_TrpA1_ FruFLP10_male alone		Following	0	0	600
TrpB2_J5	30_DIPepsilon_ uas_stop_TrpA1_ FruFLP2_male alone		Following	0	0	600
TrpB2_H4	30_DIPepsilon_ uas_stop_TrpA1_ FruFLP3_male alone		Following	0	0	600
TrpB2_M3	30_DIPepsilon_ uas_stop_TrpA1_ FruFLP4_male alone		Following	0	0	600
TrpB2_H7	30_DIPepsilon_ uas_stop_TrpA1_ FruFLP5_male alone		Following	0	0	600
TrpB2_L4	30_DIPepsilon_ uas_stop_TrpA1_ FruFLP6_male alone		Following	0	0	600
TrpB2_B4	30_DIPepsilon_ uas_stop_TrpA1_ FruFLP7_male alone		Following	0	0	600
TrpB2_C3	30_DIPepsilon_ uas_stop_TrpA1_ FruFLP8_male alone		Following	0	0	600
TrpB2_E9	30_DIPepsilon_ uas_stop_TrpA1_ FruFLP9_male alone		Following	0	0	600
TrpB2_B9	30_DIPeta_ uas_stop_TrpA1_ FruFLP1_male alone		Following	0	0	600
TrpB2_D7	30_DIPeta_ uas_stop_TrpA1_ FruFLP10_male alone		Following	0	0	600
TrpB2_B7	30_DIPeta_ uas_stop_TrpA1_ FruFLP2_male alone		Following	0	0	600
TrpB2_G8	30_DIPeta_ uas_stop_TrpA1_ FruFLP3_male alone		Following	0	0	600
TrpB2_A3	30_DIPeta_ uas_stop_TrpA1_ FruFLP4_male alone		Following	0	0	591.065
TrpB2_G1	30_DIPeta_ uas_stop_TrpA1_ FruFLP5_male alone		Following	0	0	600
TrpB2_M6	30_DIPeta_ uas_stop_TrpA1_ FruFLP6_male alone		Following	0	0	600
TrpB2_A9	30_DIPeta_ uas_stop_TrpA1_ FruFLP7_male alone		Following	0	0	600
TrpB2_M2	30_DIPeta_ uas_stop_TrpA1_ FruFLP8_male alone		Following	0	0	600
TrpB2_G4	30_DIPeta_ uas_stop_TrpA1_ FruFLP9_male alone		Following	0	0	600
TrpB2_A1	30_DIPgamma_ uas_stop_TrpA1_ FruFLP1_male alone		Following	0	0	600
TrpB2_E7	30_DIPgamma_ uas_stop_TrpA1_ FruFLP10_male alone		Following	0	0	600
TrpB2_H1	30_DIPgamma_ uas_stop_TrpA1_ FruFLP2_male alone		Following	0	0	600
TrpB2_H2	30_DIPgamma_ uas_stop_TrpA1_ FruFLP3_male alone		Following	0	0	600
TrpB2_F3	30_DIPgamma_ uas_stop_TrpA1_ FruFLP4_male alone		Following	0	0	600
TrpB2_H5	30_DIPgamma_ uas_stop_TrpA1_ FruFLP5_male alone		Following	0	0	600
TrpB2_L6	30_DIPgamma_ uas_stop_TrpA1_ FruFLP6_male alone	Abdomen bobbing- spins in circles occasionally. In beginning and ~270	Following	0	0	600
TrpB2_E2	30_DIPgamma_ uas_stop_TrpA1_ FruFLP7_male alone		Following	0	0	600
TrpB2_K3	30_DIPgamma_ uas_stop_TrpA1_ FruFLP8_male alone		Following	0	0	600
TrpB2_L5	30_DIPgamma_ uas_stop_TrpA1_ FruFLP9_male alone		Following	0	0	600
TrpB3_A2	30_DIPtheta_ uas_stop_TrpA1_ FruFLP1_male alone		Following	0	0	600
TrpB3_L7	30_DIPtheta_ uas_stop_TrpA1_ FruFLP10_male alone		Following	0	0	600
TrpB3_E4	30_DIPtheta_ uas_stop_TrpA1_ FruFLP2_male alone	ejaculation around 50?	Following	0	0	600
TrpB3_A6	30_DIPtheta_ uas_stop_TrpA1_ FruFLP3_male alone		Following	0	0	600
TrpB3_M2	30_DIPtheta_ uas_stop_TrpA1_ FruFLP4_male alone		Following	0	0	600
TrpB3_F1	30_DIPtheta_ uas_stop_TrpA1_ FruFLP5_male alone		Following	0	0	600
TrpB3_A7	30_DIPtheta_ uas_stop_TrpA1_ FruFLP6_male alone	Wing flutter ~150	Following	0	0	600
TrpB3_B6	30_DIPtheta_ uas_stop_TrpA1_ FruFLP7_male alone		Following	0	0	600
TrpB3_E6	30_DIPtheta_ uas_stop_TrpA1_ FruFLP8_male alone		Following	0	0	600
TrpB3_M1	30_DIPtheta_ uas_stop_TrpA1_ FruFLP9_male alone		Following	0	0	600
TrpB3_L8	30_DIPzeta_ uas_stop_TrpA1_ FruFLP1_male alone		Following	0	0	600
TrpB3_C7	30_DIPzeta_ uas_stop_TrpA1_ FruFLP10_male alone		Following	0	0	600
TrpB3_L2	30_DIPzeta_ uas_stop_TrpA1_ FruFLP2_male alone		Following	0	0	600
TrpB3_D3	30_DIPzeta_ uas_stop_TrpA1_ FruFLP3_male alone		Following	0	0	600
TrpB3_H4	30_DIPzeta_ uas_stop_TrpA1_ FruFLP4_male alone		Following	0	0	600
TrpB3_C3	30_DIPzeta_ uas_stop_TrpA1_ FruFLP5_male alone		Following	0	0	600
TrpB3_C1	30_DIPzeta_ uas_stop_TrpA1_ FruFLP6_male alone		Following	0	0	600
TrpB3_B2	30_DIPzeta_ uas_stop_TrpA1_ FruFLP7_male alone		Following	0	0	600
TrpB3_D5	30_DIPzeta_ uas_stop_TrpA1_ FruFLP8_male alone		Following	0	0	600
TrpB3_D9	30_DIPzeta_ uas_stop_TrpA1_ FruFLP9_male alone		Following	0	0	600
TrpB4_G6	30_dpr1_ uas_stop_TrpA1_ FruFLP1_male alone		Following	0	0	600
TrpB4_H7	30_dpr1_ uas_stop_TrpA1_ FruFLP10_male alone		Following	0	0	600
TrpB4_B6	30_dpr1_ uas_stop_TrpA1_ FruFLP2_male alone		Following	0	0	592.998
TrpB4_L8	30_dpr1_ uas_stop_TrpA1_ FruFLP3_male alone	loss of righting reflex. I think the wing ext. is throwing him off balance	Following	0	0	600
TrpB4_M2	30_dpr1_ uas_stop_TrpA1_ FruFLP4_male alone		Following	0	0	600
TrpB4_K8	30_dpr1_ uas_stop_TrpA1_ FruFLP5_male alone	weird "bucking" beahvior ~303	Following	0	0	600
TrpB4_L6	30_dpr1_ uas_stop_TrpA1_ FruFLP6_male alone	a lot of head rubbing	Following	0	0	589.598
TrpB4_C5	30_dpr1_ uas_stop_TrpA1_ FruFLP7_male alone	abdomen bobbing - but does stop	Following	0	0	600
TrpB4_G2	30_dpr1_ uas_stop_TrpA1_ FruFLP8_male alone		Following	0	0	600
TrpB4_H6	30_dpr1_ uas_stop_TrpA1_ FruFLP9_male alone		Following	0	0	600
TrpB1_D4	30_dpr10_gal4, uas_stop_Trpa1, FruFLP_male alone 1		Following	0	0	600
TrpB1_G4	30_dpr10_gal4, uas_stop_Trpa1, FruFLP_male alone 10		Following	0	0	600
TrpB1_K3	30_dpr10_gal4, uas_stop_Trpa1, FruFLP_male alone 2		Following	0	0	600
TrpB1_L2	30_dpr10_gal4, uas_stop_Trpa1, FruFLP_male alone 3		Following	0	0	600
TrpB1_C9	30_dpr10_gal4, uas_stop_Trpa1, FruFLP_male alone 4		Following	0	0	600
TrpB1_H8	30_dpr10_gal4, uas_stop_Trpa1, FruFLP_male alone 5		Following	0	0	600
TrpB1_E8	30_dpr10_gal4, uas_stop_Trpa1, FruFLP_male alone 6		Following	0	0	600
TrpB1_M4	30_dpr10_gal4, uas_stop_Trpa1, FruFLP_male alone 7		Following	0	0	600
TrpB1_B9	30_dpr10_gal4, uas_stop_Trpa1, FruFLP_male alone 8		Following	0	0	600
[truncated: 1,241 more rows]

## Sheet: 4. TNT
Noldus file name	Unblind	Coding notes	Behaviors	Total number	Total duration	Latency	Duration
B1_A1	TNTQA1_dpr16_FruFLP2	sucessful copulation with typical courtship behaviors	Abdominal Bending	2	2.7795		132.964
B1_A1	TNTQA1_dpr16_FruFLP2	sucessful copulation with typical courtship behaviors	Attempted Copulation	1	0		132.964
B1_A1	TNTQA1_dpr16_FruFLP2	sucessful copulation with typical courtship behaviors	Double Wing Extension	0	0		132.964
B1_A1	TNTQA1_dpr16_FruFLP2	sucessful copulation with typical courtship behaviors	Following	8	68.8859	19.91	132.964
B1_A1	TNTQA1_dpr16_FruFLP2	sucessful copulation with typical courtship behaviors	Loss of Righting	0	0		132.964
B1_A1	TNTQA1_dpr16_FruFLP2	sucessful copulation with typical courtship behaviors	Successful Copulation	1	0		132.964
B1_A1	TNTQA1_dpr16_FruFLP2	sucessful copulation with typical courtship behaviors	Wing Extension	4	13.404	63.7865	132.964
B1_A2	TNTE_dpr16_FruFLP5		Abdominal Bending	0	0		600
B1_A2	TNTE_dpr16_FruFLP5		Attempted Copulation	0	0		600
B1_A2	TNTE_dpr16_FruFLP5		Double Wing Extension	3	4.373		600
B1_A2	TNTE_dpr16_FruFLP5		Following	13	126.888	18.161	600
B1_A2	TNTE_dpr16_FruFLP5		Loss of Righting	5	5.358		600
B1_A2	TNTE_dpr16_FruFLP5		Successful Copulation	0	0		600
B1_A2	TNTE_dpr16_FruFLP5		Wing Extension	10	20.196	29.268	600
B1_A3	TNTE_dpr5_FruFLP2	not sucessful, lots of examples of LOR male did not spend any time following female	Abdominal Bending	0	0		600
B1_A3	TNTE_dpr5_FruFLP2	not sucessful, lots of examples of LOR male did not spend any time following female	Attempted Copulation	0	0		600
B1_A3	TNTE_dpr5_FruFLP2	not sucessful, lots of examples of LOR male did not spend any time following female	Double Wing Extension	0	0		600
B1_A3	TNTE_dpr5_FruFLP2	not sucessful, lots of examples of LOR male did not spend any time following female	Following	0	0	600	600
B1_A3	TNTE_dpr5_FruFLP2	not sucessful, lots of examples of LOR male did not spend any time following female	Loss of Righting	21	134.03		600
B1_A3	TNTE_dpr5_FruFLP2	not sucessful, lots of examples of LOR male did not spend any time following female	Successful Copulation	0	0		600
B1_A3	TNTE_dpr5_FruFLP2	not sucessful, lots of examples of LOR male did not spend any time following female	Wing Extension	0	0	600	600
B1_A4	TNTE_dpr5_FruFLP8	not sucessful, examples of LOR and jerky movement	Abdominal Bending	0	0		600
B1_A4	TNTE_dpr5_FruFLP8	not sucessful, examples of LOR and jerky movement	Attempted Copulation	0	0		600
B1_A4	TNTE_dpr5_FruFLP8	not sucessful, examples of LOR and jerky movement	Double Wing Extension	0	0		600
B1_A4	TNTE_dpr5_FruFLP8	not sucessful, examples of LOR and jerky movement	Following	0	0	600	600
B1_A4	TNTE_dpr5_FruFLP8	not sucessful, examples of LOR and jerky movement	Loss of Righting	31	169.208		600
B1_A4	TNTE_dpr5_FruFLP8	not sucessful, examples of LOR and jerky movement	Successful Copulation	0	0		600
B1_A4	TNTE_dpr5_FruFLP8	not sucessful, examples of LOR and jerky movement	Wing Extension	0	0	600	600
B1_A5	TNTQA1_dpr16_FruFLP7	not sucessful though the male attempted copulation numerous times	Abdominal Bending	15	53.251		600
B1_A5	TNTQA1_dpr16_FruFLP7	not sucessful though the male attempted copulation numerous times	Attempted Copulation	19	0		600
B1_A5	TNTQA1_dpr16_FruFLP7	not sucessful though the male attempted copulation numerous times	Double Wing Extension	13	24.168		600
B1_A5	TNTQA1_dpr16_FruFLP7	not sucessful though the male attempted copulation numerous times	Following	14	431.531	9.458	600
B1_A5	TNTQA1_dpr16_FruFLP7	not sucessful though the male attempted copulation numerous times	Loss of Righting	3	3.818		600
B1_A5	TNTQA1_dpr16_FruFLP7	not sucessful though the male attempted copulation numerous times	Successful Copulation	0	0		600
B1_A5	TNTQA1_dpr16_FruFLP7	not sucessful though the male attempted copulation numerous times	Wing Extension	48	232.825	34.039	600
B1_A6	TNTQA1_dpr16_FruFLP3	sucessful copulation with typical courtship behaviors	Abdominal Bending	7	9.69		352.519
B1_A6	TNTQA1_dpr16_FruFLP3	sucessful copulation with typical courtship behaviors	Attempted Copulation	3	0		352.519
B1_A6	TNTQA1_dpr16_FruFLP3	sucessful copulation with typical courtship behaviors	Double Wing Extension	2	6.745		352.519
B1_A6	TNTQA1_dpr16_FruFLP3	sucessful copulation with typical courtship behaviors	Following	10	173.876	29.886	352.519
B1_A6	TNTQA1_dpr16_FruFLP3	sucessful copulation with typical courtship behaviors	Loss of Righting	0	0		352.519
B1_A6	TNTQA1_dpr16_FruFLP3	sucessful copulation with typical courtship behaviors	Successful Copulation	1	0		352.519
B1_A6	TNTQA1_dpr16_FruFLP3	sucessful copulation with typical courtship behaviors	Wing Extension	27	74.861	30.019	352.519
B1_A7	TNTE_dpr16_FruFLP3	not sucessful , the male exhbited lots of abdomen bending but no attempting copulation	Abdominal Bending	12	28.559		600
B1_A7	TNTE_dpr16_FruFLP3	not sucessful , the male exhbited lots of abdomen bending but no attempting copulation	Attempted Copulation	0	0		600
B1_A7	TNTE_dpr16_FruFLP3	not sucessful , the male exhbited lots of abdomen bending but no attempting copulation	Double Wing Extension	1	3.175		600
B1_A7	TNTE_dpr16_FruFLP3	not sucessful , the male exhbited lots of abdomen bending but no attempting copulation	Following	12	117.968	51.959	600
B1_A7	TNTE_dpr16_FruFLP3	not sucessful , the male exhbited lots of abdomen bending but no attempting copulation	Loss of Righting	3	3.375		600
B1_A7	TNTE_dpr16_FruFLP3	not sucessful , the male exhbited lots of abdomen bending but no attempting copulation	Successful Copulation	0	0		600
B1_A7	TNTE_dpr16_FruFLP3	not sucessful , the male exhbited lots of abdomen bending but no attempting copulation	Wing Extension	5	9.391	132.599	600
B1_A8	TNTE_dpr5_FruFLP5	not sucessful, lots of short bouts of LOR and jerky movements male didn’t perform any courtship behaviors	Abdominal Bending	0	0		600
B1_A8	TNTE_dpr5_FruFLP5	not sucessful, lots of short bouts of LOR and jerky movements male didn’t perform any courtship behaviors	Attempted Copulation	0	0		600
B1_A8	TNTE_dpr5_FruFLP5	not sucessful, lots of short bouts of LOR and jerky movements male didn’t perform any courtship behaviors	Double Wing Extension	0	0		600
B1_A8	TNTE_dpr5_FruFLP5	not sucessful, lots of short bouts of LOR and jerky movements male didn’t perform any courtship behaviors	Following	0	0	600	600
B1_A8	TNTE_dpr5_FruFLP5	not sucessful, lots of short bouts of LOR and jerky movements male didn’t perform any courtship behaviors	Loss of Righting	36	98.969		600
B1_A8	TNTE_dpr5_FruFLP5	not sucessful, lots of short bouts of LOR and jerky movements male didn’t perform any courtship behaviors	Successful Copulation	0	0		600
B1_A8	TNTE_dpr5_FruFLP5	not sucessful, lots of short bouts of LOR and jerky movements male didn’t perform any courtship behaviors	Wing Extension	0	0	600	600
B1_B1	TNTE_dpr16_FruFLP8	not sucesful, the male exhbited lots of abdomen bending but no attempting copulation	Abdominal Bending	23	61.808		600
B1_B1	TNTE_dpr16_FruFLP8	not sucesful, the male exhbited lots of abdomen bending but no attempting copulation	Attempted Copulation	0	0		600
B1_B1	TNTE_dpr16_FruFLP8	not sucesful, the male exhbited lots of abdomen bending but no attempting copulation	Double Wing Extension	4	12.351		600
B1_B1	TNTE_dpr16_FruFLP8	not sucesful, the male exhbited lots of abdomen bending but no attempting copulation	Following	30	227.993	10.1557	600
B1_B1	TNTE_dpr16_FruFLP8	not sucesful, the male exhbited lots of abdomen bending but no attempting copulation	Loss of Righting	2	3.286		600
B1_B1	TNTE_dpr16_FruFLP8	not sucesful, the male exhbited lots of abdomen bending but no attempting copulation	Successful Copulation	0	0		600
B1_B1	TNTE_dpr16_FruFLP8	not sucesful, the male exhbited lots of abdomen bending but no attempting copulation	Wing Extension	1	1.272	301.651	600
B1_B2	TNTE_dpr5_FruFLP3	not sucessful, longer bouts of LOR	Abdominal Bending	0	0		600
B1_B2	TNTE_dpr5_FruFLP3	not sucessful, longer bouts of LOR	Attempted Copulation	0	0		600
B1_B2	TNTE_dpr5_FruFLP3	not sucessful, longer bouts of LOR	Double Wing Extension	0	0		600
B1_B2	TNTE_dpr5_FruFLP3	not sucessful, longer bouts of LOR	Following	0	0	600	600
B1_B2	TNTE_dpr5_FruFLP3	not sucessful, longer bouts of LOR	Loss of Righting	16	259.215		600
B1_B2	TNTE_dpr5_FruFLP3	not sucessful, longer bouts of LOR	Successful Copulation	0	0		600
B1_B2	TNTE_dpr5_FruFLP3	not sucessful, longer bouts of LOR	Wing Extension	0	0	600	600
B1_B3	TNTQA1_dpr16_FruFLP8	not sucessful but male attempted copulation	Abdominal Bending	20	47.208		600
B1_B3	TNTQA1_dpr16_FruFLP8	not sucessful but male attempted copulation	Attempted Copulation	8	0		600
B1_B3	TNTQA1_dpr16_FruFLP8	not sucessful but male attempted copulation	Double Wing Extension	0	0		600
B1_B3	TNTQA1_dpr16_FruFLP8	not sucessful but male attempted copulation	Following	1	274.415	95.106	600
B1_B3	TNTQA1_dpr16_FruFLP8	not sucessful but male attempted copulation	Loss of Righting	0	0		600
B1_B3	TNTQA1_dpr16_FruFLP8	not sucessful but male attempted copulation	Successful Copulation	0	0		600
B1_B3	TNTQA1_dpr16_FruFLP8	not sucessful but male attempted copulation	Wing Extension	23	165.536	94.6195	600
B1_B4	TNTE_dpr16_FruFLP2	not sucessful	Abdominal Bending	0	0		600
B1_B4	TNTE_dpr16_FruFLP2	not sucessful	Attempted Copulation	0	0		600
B1_B4	TNTE_dpr16_FruFLP2	not sucessful	Double Wing Extension	0	0		600
B1_B4	TNTE_dpr16_FruFLP2	not sucessful	Following	2	6.143	323.189	600
B1_B4	TNTE_dpr16_FruFLP2	not sucessful	Loss of Righting	2	1.446		600
B1_B4	TNTE_dpr16_FruFLP2	not sucessful	Successful Copulation	0	0		600
B1_B4	TNTE_dpr16_FruFLP2	not sucessful	Wing Extension	0	0	600	600
B1_B5	TNTQA1_dpr16_FruFLP1	sucessful copulation with typical courtship behaviors	Abdominal Bending	1	2.182		204.924
B1_B5	TNTQA1_dpr16_FruFLP1	sucessful copulation with typical courtship behaviors	Attempted Copulation	1	0		204.924
B1_B5	TNTQA1_dpr16_FruFLP1	sucessful copulation with typical courtship behaviors	Double Wing Extension	0	0		204.924
B1_B5	TNTQA1_dpr16_FruFLP1	sucessful copulation with typical courtship behaviors	Following	3	88.308	16.911	204.924
B1_B5	TNTQA1_dpr16_FruFLP1	sucessful copulation with typical courtship behaviors	Loss of Righting	0	0		204.924
B1_B5	TNTQA1_dpr16_FruFLP1	sucessful copulation with typical courtship behaviors	Successful Copulation	1	0		204.924
B1_B5	TNTQA1_dpr16_FruFLP1	sucessful copulation with typical courtship behaviors	Wing Extension	7	17.333	17.919	204.924
B1_B6	TNTE_dpr5_FruFLP1	not sucessful, lots of examples of LOR male did not spend any time following female	Abdominal Bending	0	0		600
B1_B6	TNTE_dpr5_FruFLP1	not sucessful, lots of examples of LOR male did not spend any time following female	Attempted Copulation	0	0		600
B1_B6	TNTE_dpr5_FruFLP1	not sucessful, lots of examples of LOR male did not spend any time following female	Double Wing Extension	0	0		600
B1_B6	TNTE_dpr5_FruFLP1	not sucessful, lots of examples of LOR male did not spend any time following female	Following	0	0	600	600
B1_B6	TNTE_dpr5_FruFLP1	not sucessful, lots of examples of LOR male did not spend any time following female	Loss of Righting	23	68.485		600
B1_B6	TNTE_dpr5_FruFLP1	not sucessful, lots of examples of LOR male did not spend any time following female	Successful Copulation	0	0		600
B1_B6	TNTE_dpr5_FruFLP1	not sucessful, lots of examples of LOR male did not spend any time following female	Wing Extension	0	0	600	600
B1_B7	TNTE_dpr16_FruFLP1	not sucessful, male wing ext. and abdomen bend when not orientated toward female	Abdominal Bending	13	17.6795		600
B1_B7	TNTE_dpr16_FruFLP1	not sucessful, male wing ext. and abdomen bend when not orientated toward female	Attempted Copulation	0	0		600
B1_B7	TNTE_dpr16_FruFLP1	not sucessful, male wing ext. and abdomen bend when not orientated toward female	Double Wing Extension	0	0		600
B1_B7	TNTE_dpr16_FruFLP1	not sucessful, male wing ext. and abdomen bend when not orientated toward female	Following	22	192.254	17.8347	600
B1_B7	TNTE_dpr16_FruFLP1	not sucessful, male wing ext. and abdomen bend when not orientated toward female	Loss of Righting	0	0		600
B1_B7	TNTE_dpr16_FruFLP1	not sucessful, male wing ext. and abdomen bend when not orientated toward female	Successful Copulation	0	0		600
B1_B7	TNTE_dpr16_FruFLP1	not sucessful, male wing ext. and abdomen bend when not orientated toward female	Wing Extension	35	60.3159	22.3537	600
B1_B8	TNTQA1_dpr16_FruFLP4	not sucessful, the male exhibited lots of abdomen bending but no attempting copulation	Abdominal Bending	12	15.0694		600
B1_B8	TNTQA1_dpr16_FruFLP4	not sucessful, the male exhibited lots of abdomen bending but no attempting copulation	Attempted Copulation	0	0		600
B1_B8	TNTQA1_dpr16_FruFLP4	not sucessful, the male exhibited lots of abdomen bending but no attempting copulation	Double Wing Extension	0	0		600
B1_B8	TNTQA1_dpr16_FruFLP4	not sucessful, the male exhibited lots of abdomen bending but no attempting copulation	Following	7	306.792	107.035	600
B1_B8	TNTQA1_dpr16_FruFLP4	not sucessful, the male exhibited lots of abdomen bending but no attempting copulation	Loss of Righting	1	2.782		600
B1_B8	TNTQA1_dpr16_FruFLP4	not sucessful, the male exhibited lots of abdomen bending but no attempting copulation	Successful Copulation	0	0		600
B1_B8	TNTQA1_dpr16_FruFLP4	not sucessful, the male exhibited lots of abdomen bending but no attempting copulation	Wing Extension	27	75.9939	107.395	600
B1_C1	TNTE_dpr5_FruFLP6	not sucessful, male spent most of the video on his back (LOR)	Abdominal Bending	0	0		600
B1_C1	TNTE_dpr5_FruFLP6	not sucessful, male spent most of the video on his back (LOR)	Attempted Copulation	0	0		600
B1_C1	TNTE_dpr5_FruFLP6	not sucessful, male spent most of the video on his back (LOR)	Double Wing Extension	0	0		600
B1_C1	TNTE_dpr5_FruFLP6	not sucessful, male spent most of the video on his back (LOR)	Following	0	0	600	600
B1_C1	TNTE_dpr5_FruFLP6	not sucessful, male spent most of the video on his back (LOR)	Loss of Righting	17	300.923		600
B1_C1	TNTE_dpr5_FruFLP6	not sucessful, male spent most of the video on his back (LOR)	Successful Copulation	0	0		600
B1_C1	TNTE_dpr5_FruFLP6	not sucessful, male spent most of the video on his back (LOR)	Wing Extension	0	0	600	600
B1_C2	TNTQA1_dpr16_FruFLP5		Abdominal Bending	6	5.6468		600
B1_C2	TNTQA1_dpr16_FruFLP5		Attempted Copulation	1	0		600
B1_C2	TNTQA1_dpr16_FruFLP5		Double Wing Extension	0	0		600
B1_C2	TNTQA1_dpr16_FruFLP5		Following	8	175.368	161.737	600
B1_C2	TNTQA1_dpr16_FruFLP5		Loss of Righting	5	4.269		600
B1_C2	TNTQA1_dpr16_FruFLP5		Successful Copulation	0	0		600
B1_C2	TNTQA1_dpr16_FruFLP5		Wing Extension	20	52.3985	162.969	600
B1_C3	TNTE_dpr5_FruFLP7	not sucessful, male had motor defects; LOR both short and long bouts	Abdominal Bending	0	0		600
B1_C3	TNTE_dpr5_FruFLP7	not sucessful, male had motor defects; LOR both short and long bouts	Attempted Copulation	0	0		600
B1_C3	TNTE_dpr5_FruFLP7	not sucessful, male had motor defects; LOR both short and long bouts	Double Wing Extension	0	0		600
B1_C3	TNTE_dpr5_FruFLP7	not sucessful, male had motor defects; LOR both short and long bouts	Following	0	0	600	600
B1_C3	TNTE_dpr5_FruFLP7	not sucessful, male had motor defects; LOR both short and long bouts	Loss of Righting	28	98.351		600
B1_C3	TNTE_dpr5_FruFLP7	not sucessful, male had motor defects; LOR both short and long bouts	Successful Copulation	0	0		600
B1_C3	TNTE_dpr5_FruFLP7	not sucessful, male had motor defects; LOR both short and long bouts	Wing Extension	0	0	600	600
B1_C4	TNTE_dpr16_FruFLP6		Abdominal Bending	7	24.027		600
B1_C4	TNTE_dpr16_FruFLP6		Attempted Copulation	5	0		600
B1_C4	TNTE_dpr16_FruFLP6		Double Wing Extension	0	0		600
B1_C4	TNTE_dpr16_FruFLP6		Following	13	259.539	107.428	600
B1_C4	TNTE_dpr16_FruFLP6		Loss of Righting	5	2.396		600
B1_C4	TNTE_dpr16_FruFLP6		Successful Copulation	0	0		600
B1_C4	TNTE_dpr16_FruFLP6		Wing Extension	32	90.7207	193.611	600
B1_C5	TNTQA1_dpr16_FruFLP6	not sucessful, observed the male abdomen bobbing (not something we code)	Abdominal Bending	8	14.783		600
B1_C5	TNTQA1_dpr16_FruFLP6	not sucessful, observed the male abdomen bobbing (not something we code)	Attempted Copulation	1	0		600
B1_C5	TNTQA1_dpr16_FruFLP6	not sucessful, observed the male abdomen bobbing (not something we code)	Double Wing Extension	2	3.434		600
B1_C5	TNTQA1_dpr16_FruFLP6	not sucessful, observed the male abdomen bobbing (not something we code)	Following	13	325.116	47.803	600
B1_C5	TNTQA1_dpr16_FruFLP6	not sucessful, observed the male abdomen bobbing (not something we code)	Loss of Righting	1	0.664		600
B1_C5	TNTQA1_dpr16_FruFLP6	not sucessful, observed the male abdomen bobbing (not something we code)	Successful Copulation	0	0		600
B1_C5	TNTQA1_dpr16_FruFLP6	not sucessful, observed the male abdomen bobbing (not something we code)	Wing Extension	41	126.053	48.262	600
B1_C6	TNTE_dpr16_FruFLP7	not sucessful, male performed courtship behaviors but spent most of the video "sleeping"	Abdominal Bending	9	11.931		600
B1_C6	TNTE_dpr16_FruFLP7	not sucessful, male performed courtship behaviors but spent most of the video "sleeping"	Attempted Copulation	1	0		600
B1_C6	TNTE_dpr16_FruFLP7	not sucessful, male performed courtship behaviors but spent most of the video "sleeping"	Double Wing Extension	0	0		600
B1_C6	TNTE_dpr16_FruFLP7	not sucessful, male performed courtship behaviors but spent most of the video "sleeping"	Following	10	147.784	0.284	600
B1_C6	TNTE_dpr16_FruFLP7	not sucessful, male performed courtship behaviors but spent most of the video "sleeping"	Loss of Righting	2	1.366		600
B1_C6	TNTE_dpr16_FruFLP7	not sucessful, male performed courtship behaviors but spent most of the video "sleeping"	Successful Copulation	0	0		600
B1_C6	TNTE_dpr16_FruFLP7	not sucessful, male performed courtship behaviors but spent most of the video "sleeping"	Wing Extension	18	36.531	2.43	600
B1_C7	TNTE_dpr5_FruFLP17	not sucessful, male ehxbited motor defects; LOR and jerky movements	Abdominal Bending	0	0		600
B1_C7	TNTE_dpr5_FruFLP17	not sucessful, male ehxbited motor defects; LOR and jerky movements	Attempted Copulation	0	0		600
B1_C7	TNTE_dpr5_FruFLP17	not sucessful, male ehxbited motor defects; LOR and jerky movements	Double Wing Extension	0	0		600
B1_C7	TNTE_dpr5_FruFLP17	not sucessful, male ehxbited motor defects; LOR and jerky movements	Following	0	0	600	600
B1_C7	TNTE_dpr5_FruFLP17	not sucessful, male ehxbited motor defects; LOR and jerky movements	Loss of Righting	11	150.705		600
B1_C7	TNTE_dpr5_FruFLP17	not sucessful, male ehxbited motor defects; LOR and jerky movements	Successful Copulation	0	0		600
B1_C7	TNTE_dpr5_FruFLP17	not sucessful, male ehxbited motor defects; LOR and jerky movements	Wing Extension	0	0	600	600
B1_C8	TNTE_dpr16_FruFLP4	not sucessful, male did not attempt copulation but performed typical courtship behaviors	Abdominal Bending	0	0		600
B1_C8	TNTE_dpr16_FruFLP4	not sucessful, male did not attempt copulation but performed typical courtship behaviors	Attempted Copulation	0	0		600
B1_C8	TNTE_dpr16_FruFLP4	not sucessful, male did not attempt copulation but performed typical courtship behaviors	Double Wing Extension	0	0		600
B1_C8	TNTE_dpr16_FruFLP4	not sucessful, male did not attempt copulation but performed typical courtship behaviors	Following	20	233.778	11.747	600
B1_C8	TNTE_dpr16_FruFLP4	not sucessful, male did not attempt copulation but performed typical courtship behaviors	Loss of Righting	2	2.62		600
B1_C8	TNTE_dpr16_FruFLP4	not sucessful, male did not attempt copulation but performed typical courtship behaviors	Successful Copulation	0	0		600
B1_C8	TNTE_dpr16_FruFLP4	not sucessful, male did not attempt copulation but performed typical courtship behaviors	Wing Extension	26	50.729	14.155	600
B10_A1	TNTQA1_DIPeta_FruFLP12		Abdominal Bending	0	0		600
B10_A1	TNTQA1_DIPeta_FruFLP12		Attempted Copulation	1	0		600
B10_A1	TNTQA1_DIPeta_FruFLP12		Double Wing Extension	0	0		600
B10_A1	TNTQA1_DIPeta_FruFLP12		Following	18	368.143	15.526	600
B10_A1	TNTQA1_DIPeta_FruFLP12		Loss of Righting	0	0		600
B10_A1	TNTQA1_DIPeta_FruFLP12		Successful Copulation	0	0		600
B10_A1	TNTQA1_DIPeta_FruFLP12		Wing Extension	49	128.945	42.114	600
B10_A2	TNTE_FruFLP_2_11		Abdominal Bending	0	0		600
B10_A2	TNTE_FruFLP_2_11		Attempted Copulation	1	0		600
B10_A2	TNTE_FruFLP_2_11		Double Wing Extension	0	0		600
B10_A2	TNTE_FruFLP_2_11		Following	19	349.05	38.037	600
B10_A2	TNTE_FruFLP_2_11		Loss of Righting	0	0		600
B10_A2	TNTE_FruFLP_2_11		Successful Copulation	0	0		600
B10_A2	TNTE_FruFLP_2_11		Wing Extension	62	107.473	39.813	600
B10_A3	TNTE_dpr12_FruFLP9	male very messed up and wings held out	Abdominal Bending	0	0		600
B10_A3	TNTE_dpr12_FruFLP9	male very messed up and wings held out	Attempted Copulation	0	0		600
B10_A3	TNTE_dpr12_FruFLP9	male very messed up and wings held out	Double Wing Extension	0	0		600
B10_A3	TNTE_dpr12_FruFLP9	male very messed up and wings held out	Following	0	0	600	600
B10_A3	TNTE_dpr12_FruFLP9	male very messed up and wings held out	Loss of Righting	1	1.384		600
B10_A3	TNTE_dpr12_FruFLP9	male very messed up and wings held out	Successful Copulation	0	0		600
B10_A3	TNTE_dpr12_FruFLP9	male very messed up and wings held out	Wing Extension	0	0	600	600
B10_A4	TNTQA1_FruFLP_2_15		Abdominal Bending	0	0		600
B10_A4	TNTQA1_FruFLP_2_15		Attempted Copulation	6	0		600
B10_A4	TNTQA1_FruFLP_2_15		Double Wing Extension	0	0		600
B10_A4	TNTQA1_FruFLP_2_15		Following	27	456.992	3.66	600
B10_A4	TNTQA1_FruFLP_2_15		Loss of Righting	0	0		600
B10_A4	TNTQA1_FruFLP_2_15		Successful Copulation	0	0		600
B10_A4	TNTQA1_FruFLP_2_15		Wing Extension	72	90.2805	18.597	600
B10_A5	TNTQA1_FruFLP_2_10		Abdominal Bending	0	0		600
B10_A5	TNTQA1_FruFLP_2_10		Attempted Copulation	0	0		600
B10_A5	TNTQA1_FruFLP_2_10		Double Wing Extension	0	0		600
B10_A5	TNTQA1_FruFLP_2_10		Following	0	0	600	600
B10_A5	TNTQA1_FruFLP_2_10		Loss of Righting	0	0		600
B10_A5	TNTQA1_FruFLP_2_10		Successful Copulation	0	0		600
B10_A5	TNTQA1_FruFLP_2_10		Wing Extension	0	0	600	600
B10_A6	CS_2_10		Abdominal Bending	0	0		600
B10_A6	CS_2_10		Attempted Copulation	5	0		600
B10_A6	CS_2_10		Double Wing Extension	0	0		600
B10_A6	CS_2_10		Following	12	514.136	7.519	600
B10_A6	CS_2_10		Loss of Righting	0	0		600
B10_A6	CS_2_10		Successful Copulation	0	0		600
B10_A6	CS_2_10		Wing Extension	107	190.655	12.492	600
B10_A7	TNTQA1_dpr19_FruFLP10		Abdominal Bending	1	4.152		417.332
B10_A7	TNTQA1_dpr19_FruFLP10		Attempted Copulation	6	0		417.332
B10_A7	TNTQA1_dpr19_FruFLP10		Double Wing Extension	0	0		417.332
B10_A7	TNTQA1_dpr19_FruFLP10		Following	16	261.936	4.584	417.332
B10_A7	TNTQA1_dpr19_FruFLP10		Loss of Righting	0	0		417.332
B10_A7	TNTQA1_dpr19_FruFLP10		Successful Copulation	1	0		417.332
B10_A7	TNTQA1_dpr19_FruFLP10		Wing Extension	34	63.682	43.307	417.332
B10_A8	TNTE_dpr12_FruFLP15		Abdominal Bending	0	0		600
B10_A8	TNTE_dpr12_FruFLP15		Attempted Copulation	0	0		600
B10_A8	TNTE_dpr12_FruFLP15		Double Wing Extension	0	0		600
B10_A8	TNTE_dpr12_FruFLP15		Following	0	0	600	600
B10_A8	TNTE_dpr12_FruFLP15		Loss of Righting	1	2.127		600
B10_A8	TNTE_dpr12_FruFLP15		Successful Copulation	0	0		600
B10_A8	TNTE_dpr12_FruFLP15		Wing Extension	0	0	600	600
B10_A9	TNTQA1_DIPeta_FruFLP10		Abdominal Bending	0	0		600
B10_A9	TNTQA1_DIPeta_FruFLP10		Attempted Copulation	0	0		600
B10_A9	TNTQA1_DIPeta_FruFLP10		Double Wing Extension	0	0		600
B10_A9	TNTQA1_DIPeta_FruFLP10		Following	2	24.864	42.5121	600
B10_A9	TNTQA1_DIPeta_FruFLP10		Loss of Righting	0	0		600
B10_A9	TNTQA1_DIPeta_FruFLP10		Successful Copulation	0	0		600
B10_A9	TNTQA1_DIPeta_FruFLP10		Wing Extension	1	4.672	210.115	600
B10_B1	TNTE_FruFLP_2_16		Abdominal Bending	0	0		600
B10_B1	TNTE_FruFLP_2_16		Attempted Copulation	1	0		600
B10_B1	TNTE_FruFLP_2_16		Double Wing Extension	0	0		600
B10_B1	TNTE_FruFLP_2_16		Following	11	391.652	35.765	600
B10_B1	TNTE_FruFLP_2_16		Loss of Righting	0	0		600
B10_B1	TNTE_FruFLP_2_16		Successful Copulation	0	0		600
B10_B1	TNTE_FruFLP_2_16		Wing Extension	44	85.577	45.669	600
B10_B2	TNTQA1_dpr19_FruFLP14		Abdominal Bending	1	3.289		600
B10_B2	TNTQA1_dpr19_FruFLP14		Attempted Copulation	2	0		600
B10_B2	TNTQA1_dpr19_FruFLP14		Double Wing Extension	0	0		600
B10_B2	TNTQA1_dpr19_FruFLP14		Following	29	241.637	14.563	600
B10_B2	TNTQA1_dpr19_FruFLP14		Loss of Righting	0	0		600
B10_B2	TNTQA1_dpr19_FruFLP14		Successful Copulation	0	0		600
B10_B2	TNTQA1_dpr19_FruFLP14		Wing Extension	46	47.684	39.771	600
B10_B3	TNTE_dpr12_FruFLP11	male very messed up and wings held out	Abdominal Bending	0	0		600
B10_B3	TNTE_dpr12_FruFLP11	male very messed up and wings held out	Attempted Copulation	0	0		600
B10_B3	TNTE_dpr12_FruFLP11	male very messed up and wings held out	Double Wing Extension	0	0		600
B10_B3	TNTE_dpr12_FruFLP11	male very messed up and wings held out	Following	0	0	600	600
B10_B3	TNTE_dpr12_FruFLP11	male very messed up and wings held out	Loss of Righting	0	0		600
B10_B3	TNTE_dpr12_FruFLP11	male very messed up and wings held out	Successful Copulation	0	0		600
B10_B3	TNTE_dpr12_FruFLP11	male very messed up and wings held out	Wing Extension	0	0	600	600
B10_B4	TNTQA1_FruFLP_2_13		Abdominal Bending	0	0		600
B10_B4	TNTQA1_FruFLP_2_13		Attempted Copulation	0	0		600
B10_B4	TNTQA1_FruFLP_2_13		Double Wing Extension	0	0		600
B10_B4	TNTQA1_FruFLP_2_13		Following	1	1.576	139.737	600
B10_B4	TNTQA1_FruFLP_2_13		Loss of Righting	0	0		600
B10_B4	TNTQA1_FruFLP_2_13		Successful Copulation	0	0		600
B10_B4	TNTQA1_FruFLP_2_13		Wing Extension	0	0	600	600
B10_B5	TNTE_dpr12_FruFLP12	male very messed up and wings held out	Abdominal Bending	0	0		600
B10_B5	TNTE_dpr12_FruFLP12	male very messed up and wings held out	Attempted Copulation	0	0		600
B10_B5	TNTE_dpr12_FruFLP12	male very messed up and wings held out	Double Wing Extension	0	0		600
B10_B5	TNTE_dpr12_FruFLP12	male very messed up and wings held out	Following	0	0	600	600
B10_B5	TNTE_dpr12_FruFLP12	male very messed up and wings held out	Loss of Righting	3	12.098		600
B10_B5	TNTE_dpr12_FruFLP12	male very messed up and wings held out	Successful Copulation	0	0		600
B10_B5	TNTE_dpr12_FruFLP12	male very messed up and wings held out	Wing Extension	0	0	600	600
B10_B6	CS_2_13		Abdominal Bending	0	0		555.758
B10_B6	CS_2_13		Attempted Copulation	0	0		555.758
B10_B6	CS_2_13		Double Wing Extension	0	0		555.758
B10_B6	CS_2_13		Following	14	464.945	18.819	555.758
B10_B6	CS_2_13		Loss of Righting	0	0		555.758
B10_B6	CS_2_13		Successful Copulation	1	0		555.758
B10_B6	CS_2_13		Wing Extension	72	121.461	20.202	555.758
B10_B7	TNTE_dpr12_FruFLP16	male semi messed up. Wings held out slightly. Spent a lot of time cleaning himself	Abdominal Bending	0	0		600
B10_B7	TNTE_dpr12_FruFLP16	male semi messed up. Wings held out slightly. Spent a lot of time cleaning himself	Attempted Copulation	0	0		600
B10_B7	TNTE_dpr12_FruFLP16	male semi messed up. Wings held out slightly. Spent a lot of time cleaning himself	Double Wing Extension	0	0		600
B10_B7	TNTE_dpr12_FruFLP16	male semi messed up. Wings held out slightly. Spent a lot of time cleaning himself	Following	0	0	600	600
B10_B7	TNTE_dpr12_FruFLP16	male semi messed up. Wings held out slightly. Spent a lot of time cleaning himself	Loss of Righting	0	0		600
B10_B7	TNTE_dpr12_FruFLP16	male semi messed up. Wings held out slightly. Spent a lot of time cleaning himself	Successful Copulation	0	0		600
B10_B7	TNTE_dpr12_FruFLP16	male semi messed up. Wings held out slightly. Spent a lot of time cleaning himself	Wing Extension	0	0	600	600
B10_B8	TNTQA1_DIPeta_FruFLP16		Abdominal Bending	0	0		600
B10_B8	TNTQA1_DIPeta_FruFLP16		Attempted Copulation	1	0		600
B10_B8	TNTQA1_DIPeta_FruFLP16		Double Wing Extension	0	0		600
B10_B8	TNTQA1_DIPeta_FruFLP16		Following	9	85.694	9.424	600
B10_B8	TNTQA1_DIPeta_FruFLP16		Loss of Righting	0	0		600
B10_B8	TNTQA1_DIPeta_FruFLP16		Successful Copulation	0	0		600
B10_B8	TNTQA1_DIPeta_FruFLP16		Wing Extension	13	29.629	41.311	600
B10_B9	TNTQA1_dpr7_FruFLP14		Abdominal Bending	0	0		280.29
B10_B9	TNTQA1_dpr7_FruFLP14		Attempted Copulation	0	0		280.29
B10_B9	TNTQA1_dpr7_FruFLP14		Double Wing Extension	0	0		280.29
B10_B9	TNTQA1_dpr7_FruFLP14		Following	9	178.077	43.239	280.29
B10_B9	TNTQA1_dpr7_FruFLP14		Loss of Righting	0	0		280.29
B10_B9	TNTQA1_dpr7_FruFLP14		Successful Copulation	1	0		280.29
B10_B9	TNTQA1_dpr7_FruFLP14		Wing Extension	29	34.4705	55.319	280.29
B10_C1	TNTQA1_dpr7_FruFLP15		Abdominal Bending	0	0		600
B10_C1	TNTQA1_dpr7_FruFLP15		Attempted Copulation	1	0		600
B10_C1	TNTQA1_dpr7_FruFLP15		Double Wing Extension	0	0		600
B10_C1	TNTQA1_dpr7_FruFLP15		Following	2	21.583	21.313	600
B10_C1	TNTQA1_dpr7_FruFLP15		Loss of Righting	0	0		600
B10_C1	TNTQA1_dpr7_FruFLP15		Successful Copulation	0	0		600
B10_C1	TNTQA1_dpr7_FruFLP15		Wing Extension	2	0.608	459.092	600
B10_C2	TNTQA1_dpr7_FruFLP9		Abdominal Bending	0	0		181.899
B10_C2	TNTQA1_dpr7_FruFLP9		Attempted Copulation	3	0		181.899
B10_C2	TNTQA1_dpr7_FruFLP9		Double Wing Extension	0	0		181.899
B10_C2	TNTQA1_dpr7_FruFLP9		Following	5	123.519	13.922	181.899
B10_C2	TNTQA1_dpr7_FruFLP9		Loss of Righting	0	0		181.899
B10_C2	TNTQA1_dpr7_FruFLP9		Successful Copulation	1	0		181.899
B10_C2	TNTQA1_dpr7_FruFLP9		Wing Extension	24	27.952	18.343	181.899
B10_C3	TNTE_dpr19_FruFLP16		Abdominal Bending	0	0		600
B10_C3	TNTE_dpr19_FruFLP16		Attempted Copulation	0	0		600
B10_C3	TNTE_dpr19_FruFLP16		Double Wing Extension	0	0		600
B10_C3	TNTE_dpr19_FruFLP16		Following	7	84.75	9.205	600
B10_C3	TNTE_dpr19_FruFLP16		Loss of Righting	0	0		600
B10_C3	TNTE_dpr19_FruFLP16		Successful Copulation	0	0		600
B10_C3	TNTE_dpr19_FruFLP16		Wing Extension	7	7.806	17.037	600
B10_C4	TNTE_dpr12_FruFLP14	spent a lot of time cleaning himself	Abdominal Bending	0	0		600
B10_C4	TNTE_dpr12_FruFLP14	spent a lot of time cleaning himself	Attempted Copulation	0	0		600
B10_C4	TNTE_dpr12_FruFLP14	spent a lot of time cleaning himself	Double Wing Extension	0	0		600
B10_C4	TNTE_dpr12_FruFLP14	spent a lot of time cleaning himself	Following	0	0	600	600
B10_C4	TNTE_dpr12_FruFLP14	spent a lot of time cleaning himself	Loss of Righting	2	6.472		600
B10_C4	TNTE_dpr12_FruFLP14	spent a lot of time cleaning himself	Successful Copulation	0	0		600
B10_C4	TNTE_dpr12_FruFLP14	spent a lot of time cleaning himself	Wing Extension	0	0	600	600
B10_C5	TNTE_FruFLP_2_13		Abdominal Bending	0	0		600
B10_C5	TNTE_FruFLP_2_13		Attempted Copulation	3	0		600
B10_C5	TNTE_FruFLP_2_13		Double Wing Extension	0	0		600
B10_C5	TNTE_FruFLP_2_13		Following	17	459.234	7.108	600
B10_C5	TNTE_FruFLP_2_13		Loss of Righting	0	0		600
B10_C5	TNTE_FruFLP_2_13		Successful Copulation	0	0		600
B10_C5	TNTE_FruFLP_2_13		Wing Extension	79	229.989	16.766	600
B10_C6	CS_2_12		Abdominal Bending	0	0		78.139
B10_C6	CS_2_12		Attempted Copulation	0	0		78.139
B10_C6	CS_2_12		Double Wing Extension	0	0		78.139
B10_C6	CS_2_12		Following	1	63.391	14.748	78.139
B10_C6	CS_2_12		Loss of Righting	0	0		78.139
B10_C6	CS_2_12		Successful Copulation	1	0		78.139
B10_C6	CS_2_12		Wing Extension	10	28.719	15.772	78.139
B10_C7	TNTE_dpr19_FruFLP15		Abdominal Bending	0	0		600
B10_C7	TNTE_dpr19_FruFLP15		Attempted Copulation	1	0		600
B10_C7	TNTE_dpr19_FruFLP15		Double Wing Extension	0	0		600
B10_C7	TNTE_dpr19_FruFLP15		Following	7	214.029	224.885	600
B10_C7	TNTE_dpr19_FruFLP15		Loss of Righting	0	0		600
B10_C7	TNTE_dpr19_FruFLP15		Successful Copulation	0	0		600
B10_C7	TNTE_dpr19_FruFLP15		Wing Extension	22	35.2757	244.568	600
B10_C8	TNTE_FruFLP_2_10		Abdominal Bending	0	0		600
B10_C8	TNTE_FruFLP_2_10		Attempted Copulation	0	0		600
B10_C8	TNTE_FruFLP_2_10		Double Wing Extension	0	0		600
B10_C8	TNTE_FruFLP_2_10		Following	11	126.465	18.734	600
B10_C8	TNTE_FruFLP_2_10		Loss of Righting	0	0		600
B10_C8	TNTE_FruFLP_2_10		Successful Copulation	0	0		600
B10_C8	TNTE_FruFLP_2_10		Wing Extension	16	16.78	28.39	600
B10_C9	TNTQA1_dpr7_FruFLP12	successful copulation, check spreadsheet	Abdominal Bending	0	0		600
B10_C9	TNTQA1_dpr7_FruFLP12	successful copulation, check spreadsheet	Attempted Copulation	2	0		600
B10_C9	TNTQA1_dpr7_FruFLP12	successful copulation, check spreadsheet	Double Wing Extension	0	0		600
B10_C9	TNTQA1_dpr7_FruFLP12	successful copulation, check spreadsheet	Following	16	208.023	19.3593	600
B10_C9	TNTQA1_dpr7_FruFLP12	successful copulation, check spreadsheet	Loss of Righting	0	0		600
B10_C9	TNTQA1_dpr7_FruFLP12	successful copulation, check spreadsheet	Successful Copulation	1	0		600
B10_C9	TNTQA1_dpr7_FruFLP12	successful copulation, check spreadsheet	Wing Extension	26	48.4865	112.062	600
B10_D1	TNTE_FruFLP_2_15		Abdominal Bending	0	0		600
B10_D1	TNTE_FruFLP_2_15		Attempted Copulation	2	0		600
B10_D1	TNTE_FruFLP_2_15		Double Wing Extension	0	0		600
B10_D1	TNTE_FruFLP_2_15		Following	13	363.461	3.936	600
B10_D1	TNTE_FruFLP_2_15		Loss of Righting	0	0		600
B10_D1	TNTE_FruFLP_2_15		Successful Copulation	0	0		600
B10_D1	TNTE_FruFLP_2_15		Wing Extension	55	124.98	11.848	600
B10_D2	TNTQA1_dpr7_FruFLP13		Abdominal Bending	0	0		600
B10_D2	TNTQA1_dpr7_FruFLP13		Attempted Copulation	0	0		600
B10_D2	TNTQA1_dpr7_FruFLP13		Double Wing Extension	0	0		600
B10_D2	TNTQA1_dpr7_FruFLP13		Following	4	18.47	9.138	600
B10_D2	TNTQA1_dpr7_FruFLP13		Loss of Righting	0	0		600
B10_D2	TNTQA1_dpr7_FruFLP13		Successful Copulation	0	0		600
B10_D2	TNTQA1_dpr7_FruFLP13		Wing Extension	0	0	600	600
B10_D3	TNTE_FruFLP_2_14		Abdominal Bending	0	0		600
B10_D3	TNTE_FruFLP_2_14		Attempted Copulation	0	0		600
B10_D3	TNTE_FruFLP_2_14		Double Wing Extension	0	0		600
B10_D3	TNTE_FruFLP_2_14		Following	9	307.472	71.5928	600
B10_D3	TNTE_FruFLP_2_14		Loss of Righting	1	2.311		600
B10_D3	TNTE_FruFLP_2_14		Successful Copulation	0	0		600
B10_D3	TNTE_FruFLP_2_14		Wing Extension	27	56.916	90.9688	600
B10_D4	TNTE_dpr19_FruFLP11		Abdominal Bending	0	0		600
B10_D4	TNTE_dpr19_FruFLP11		Attempted Copulation	2	0		600
B10_D4	TNTE_dpr19_FruFLP11		Double Wing Extension	0	0		600
B10_D4	TNTE_dpr19_FruFLP11		Following	31	326.834	3.432	600
B10_D4	TNTE_dpr19_FruFLP11		Loss of Righting	0	0		600
B10_D4	TNTE_dpr19_FruFLP11		Successful Copulation	0	0		600
B10_D4	TNTE_dpr19_FruFLP11		Wing Extension	42	31.05	101.42	600
B10_D5	CS_2_11		Abdominal Bending	0	0		600
B10_D5	CS_2_11		Attempted Copulation	1	0		600
B10_D5	CS_2_11		Double Wing Extension	0	0		600
B10_D5	CS_2_11		Following	16	437.538	23.092	600
B10_D5	CS_2_11		Loss of Righting	0	0		600
B10_D5	CS_2_11		Successful Copulation	0	0		600
B10_D5	CS_2_11		Wing Extension	56	162.499	28.508	600
B10_D6	TNTQA1_dpr19_FruFLP13		Abdominal Bending	1	1.784		600
B10_D6	TNTQA1_dpr19_FruFLP13		Attempted Copulation	4	0		600
B10_D6	TNTQA1_dpr19_FruFLP13		Double Wing Extension	0	0		600
B10_D6	TNTQA1_dpr19_FruFLP13		Following	8	96.198	18.802	600
B10_D6	TNTQA1_dpr19_FruFLP13		Loss of Righting	0	0		600
B10_D6	TNTQA1_dpr19_FruFLP13		Successful Copulation	0	0		600
B10_D6	TNTQA1_dpr19_FruFLP13		Wing Extension	5	5.763	39.159	600
B10_D7	CS_2_9		Abdominal Bending	0	0		348.541
B10_D7	CS_2_9		Attempted Copulation	0	0		348.541
B10_D7	CS_2_9		Double Wing Extension	0	0		348.541
B10_D7	CS_2_9		Following	4	290.952	45.311	348.541
B10_D7	CS_2_9		Loss of Righting	0	0		348.541
B10_D7	CS_2_9		Successful Copulation	1	0		348.541
B10_D7	CS_2_9		Wing Extension	36	98.6075	46.104	348.541
B10_D8	TNTQA1_DIPeta_FruFLP11		Abdominal Bending	0	0		600
B10_D8	TNTQA1_DIPeta_FruFLP11		Attempted Copulation	0	0		600
B10_D8	TNTQA1_DIPeta_FruFLP11		Double Wing Extension	0	0		600
B10_D8	TNTQA1_DIPeta_FruFLP11		Following	1	5.52	1.804	600
B10_D8	TNTQA1_DIPeta_FruFLP11		Loss of Righting	0	0		600
B10_D8	TNTQA1_DIPeta_FruFLP11		Successful Copulation	0	0		600
B10_D8	TNTQA1_DIPeta_FruFLP11		Wing Extension	0	0	600	600
B10_D9	wcs_10		Abdominal Bending	0	0		600
B10_D9	wcs_10		Attempted Copulation	0	0		600
B10_D9	wcs_10		Double Wing Extension	0	0		600
B10_D9	wcs_10		Following	14	79.035	17.8049	600
B10_D9	wcs_10		Loss of Righting	0	0		600
B10_D9	wcs_10		Successful Copulation	0	0		600
B10_D9	wcs_10		Wing Extension	13	25.629	136.979	600
B10_E1	TNTE_dpr12_FruFLP13		Abdominal Bending	0	0		600
B10_E1	TNTE_dpr12_FruFLP13		Attempted Copulation	0	0		600
B10_E1	TNTE_dpr12_FruFLP13		Double Wing Extension	0	0		600
B10_E1	TNTE_dpr12_FruFLP13		Following	0	0	600	600
B10_E1	TNTE_dpr12_FruFLP13		Loss of Righting	12	22.941		600
B10_E1	TNTE_dpr12_FruFLP13		Successful Copulation	0	0		600
B10_E1	TNTE_dpr12_FruFLP13		Wing Extension	0	0	600	600
B10_E2	TNTQA1_DIPeta_FruFLP15		Abdominal Bending	0	0		600
B10_E2	TNTQA1_DIPeta_FruFLP15		Attempted Copulation	2	0		600
B10_E2	TNTQA1_DIPeta_FruFLP15		Double Wing Extension	0	0		600
B10_E2	TNTQA1_DIPeta_FruFLP15		Following	21	317.438	13.688	600
B10_E2	TNTQA1_DIPeta_FruFLP15		Loss of Righting	0	0		600
B10_E2	TNTQA1_DIPeta_FruFLP15		Successful Copulation	0	0		600
B10_E2	TNTQA1_DIPeta_FruFLP15		Wing Extension	36	48.398	63.3375	600
B10_E3	TNTQA1_FruFLP_2_16		Abdominal Bending	0	0		363.669
B10_E3	TNTQA1_FruFLP_2_16		Attempted Copulation	0	0		363.669
B10_E3	TNTQA1_FruFLP_2_16		Double Wing Extension	0	0		363.669
B10_E3	TNTQA1_FruFLP_2_16		Following	6	72.4159	205.873	363.669
B10_E3	TNTQA1_FruFLP_2_16		Loss of Righting	0	0		363.669
B10_E3	TNTQA1_FruFLP_2_16		Successful Copulation	1	0		363.669
B10_E3	TNTQA1_FruFLP_2_16		Wing Extension	7	9.38194	214.184	363.669
B10_E4	wcs_13		Abdominal Bending	0	0		600
B10_E4	wcs_13		Attempted Copulation	1	0		600
B10_E4	wcs_13		Double Wing Extension	0	0		600
B10_E4	wcs_13		Following	13	267.99	23.711	600
B10_E4	wcs_13		Loss of Righting	0	0		600
B10_E4	wcs_13		Successful Copulation	0	0		600
B10_E4	wcs_13		Wing Extension	39	63.983	63.679	600
B10_E5	TNTE_dpr19_FruFLP13		Abdominal Bending	0	0		600
B10_E5	TNTE_dpr19_FruFLP13		Attempted Copulation	0	0		600
B10_E5	TNTE_dpr19_FruFLP13		Double Wing Extension	0	0		600
B10_E5	TNTE_dpr19_FruFLP13		Following	13	85.4668	56.8384	600
B10_E5	TNTE_dpr19_FruFLP13		Loss of Righting	1	1.144		600
B10_E5	TNTE_dpr19_FruFLP13		Successful Copulation	0	0		600
B10_E5	TNTE_dpr19_FruFLP13		Wing Extension	20	20.382	69.8224	600
B10_E6	CS_2_15		Abdominal Bending	0	0		272.288
B10_E6	CS_2_15		Attempted Copulation	1	0		272.288
B10_E6	CS_2_15		Double Wing Extension	0	0		272.288
B10_E6	CS_2_15		Following	4	213.99	15.012	272.288
B10_E6	CS_2_15		Loss of Righting	0	0		272.288
B10_E6	CS_2_15		Successful Copulation	1	0		272.288
B10_E6	CS_2_15		Wing Extension	28	73.697	15.892	272.288
B10_E7	TNTQA1_dpr7_FruFLP11		Abdominal Bending	0	0		442.791
B10_E7	TNTQA1_dpr7_FruFLP11		Attempted Copulation	2	0		442.791
B10_E7	TNTQA1_dpr7_FruFLP11		Double Wing Extension	0	0		442.791
B10_E7	TNTQA1_dpr7_FruFLP11		Following	26	260.788	2.202	442.791
B10_E7	TNTQA1_dpr7_FruFLP11		Loss of Righting	0	0		442.791
B10_E7	TNTQA1_dpr7_FruFLP11		Successful Copulation	1	0		442.791
B10_E7	TNTQA1_dpr7_FruFLP11		Wing Extension	46	46.7386	23.162	442.791
B10_E8	TNTQA1_FruFLP_2_9		Abdominal Bending	1	6.416		600
B10_E8	TNTQA1_FruFLP_2_9		Attempted Copulation	8	0		600
B10_E8	TNTQA1_FruFLP_2_9		Double Wing Extension	0	0		600
B10_E8	TNTQA1_FruFLP_2_9		Following	33	359.315	22.6231	600
B10_E8	TNTQA1_FruFLP_2_9		Loss of Righting	0	0		600
B10_E8	TNTQA1_FruFLP_2_9		Successful Copulation	0	0		600
B10_E8	TNTQA1_FruFLP_2_9		Wing Extension	94	155.248	23.4481	600
B10_E9	CS_2_16		Abdominal Bending	0	0		155.319
B10_E9	CS_2_16		Attempted Copulation	3	0		155.319
B10_E9	CS_2_16		Double Wing Extension	0	0		155.319
B10_E9	CS_2_16		Following	1	115.578	39.741	155.319
B10_E9	CS_2_16		Loss of Righting	0	0		155.319
B10_E9	CS_2_16		Successful Copulation	1	0		155.319
B10_E9	CS_2_16		Wing Extension	22	43.7738	44.093	155.319
B10_F1	TNTQA1_dpr19_FruFLP15		Abdominal Bending	0	0		587.616
B10_F1	TNTQA1_dpr19_FruFLP15		Attempted Copulation	2	0		587.616
B10_F1	TNTQA1_dpr19_FruFLP15		Double Wing Extension	0	0		587.616
B10_F1	TNTQA1_dpr19_FruFLP15		Following	39	269.741	38.292	587.616
B10_F1	TNTQA1_dpr19_FruFLP15		Loss of Righting	0	0		587.616
B10_F1	TNTQA1_dpr19_FruFLP15		Successful Copulation	1	0		587.616
B10_F1	TNTQA1_dpr19_FruFLP15		Wing Extension	49	43.7172	50.356	587.616
B10_F2	TNTQA1_dpr19_FruFLP11		Abdominal Bending	0	0		119.195
B10_F2	TNTQA1_dpr19_FruFLP11		Attempted Copulation	0	0		119.195
B10_F2	TNTQA1_dpr19_FruFLP11		Double Wing Extension	0	0		119.195
B10_F2	TNTQA1_dpr19_FruFLP11		Following	7	87.668	1.919	119.195
B10_F2	TNTQA1_dpr19_FruFLP11		Loss of Righting	0	0		119.195
B10_F2	TNTQA1_dpr19_FruFLP11		Successful Copulation	1	0		119.195
B10_F2	TNTQA1_dpr19_FruFLP11		Wing Extension	15	11.874	2.464	119.195
B10_F3	TNTE_dpr19_FruFLP9		Abdominal Bending	0	0		600
B10_F3	TNTE_dpr19_FruFLP9		Attempted Copulation	1	0		600
B10_F3	TNTE_dpr19_FruFLP9		Double Wing Extension	0	0		600
B10_F3	TNTE_dpr19_FruFLP9		Following	11	419.774	31.187	600
B10_F3	TNTE_dpr19_FruFLP9		Loss of Righting	0	0		600
B10_F3	TNTE_dpr19_FruFLP9		Successful Copulation	0	0		600
B10_F3	TNTE_dpr19_FruFLP9		Wing Extension	51	96.007	42.355	600
B10_F4	TNTE_dpr19_FruFLP10		Abdominal Bending	0	0		334.805
B10_F4	TNTE_dpr19_FruFLP10		Attempted Copulation	0	0		334.805
B10_F4	TNTE_dpr19_FruFLP10		Double Wing Extension	0	0		334.805
B10_F4	TNTE_dpr19_FruFLP10		Following	11	267.776	8.604	334.805
B10_F4	TNTE_dpr19_FruFLP10		Loss of Righting	0	0		334.805
B10_F4	TNTE_dpr19_FruFLP10		Successful Copulation	1	0		334.805
B10_F4	TNTE_dpr19_FruFLP10		Wing Extension	32	43.403	16.452	334.805
B10_F5	TNTQA1_DIPeta_FruFLP9		Abdominal Bending	0	0		600
B10_F5	TNTQA1_DIPeta_FruFLP9		Attempted Copulation	0	0		600
B10_F5	TNTQA1_DIPeta_FruFLP9		Double Wing Extension	3	1.973		600
B10_F5	TNTQA1_DIPeta_FruFLP9		Following	17	112.537	28.047	600
B10_F5	TNTQA1_DIPeta_FruFLP9		Loss of Righting	0	0		600
B10_F5	TNTQA1_DIPeta_FruFLP9		Successful Copulation	0	0		600
B10_F5	TNTQA1_DIPeta_FruFLP9		Wing Extension	17	26.84	40.77	600
B10_F6	TNTE_FruFLP_2_12		Abdominal Bending	0	0		600
B10_F6	TNTE_FruFLP_2_12		Attempted Copulation	0	0		600
B10_F6	TNTE_FruFLP_2_12		Double Wing Extension	0	0		600
B10_F6	TNTE_FruFLP_2_12		Following	1	4.455	1.03	600
B10_F6	TNTE_FruFLP_2_12		Loss of Righting	0	0		600
B10_F6	TNTE_FruFLP_2_12		Successful Copulation	0	0		600
B10_F6	TNTE_FruFLP_2_12		Wing Extension	0	0	600	600
B10_F7	TNTQA1_FruFLP_2_12		Abdominal Bending	0	0		430.849
B10_F7	TNTQA1_FruFLP_2_12		Attempted Copulation	2	0		430.849
B10_F7	TNTQA1_FruFLP_2_12		Double Wing Extension	0	0		430.849
B10_F7	TNTQA1_FruFLP_2_12		Following	11	174.723	12.5	430.849
B10_F7	TNTQA1_FruFLP_2_12		Loss of Righting	0	0		430.849
B10_F7	TNTQA1_FruFLP_2_12		Successful Copulation	1	0		430.849
B10_F7	TNTQA1_FruFLP_2_12		Wing Extension	37	52.0606	13.18	430.849
B10_F8	wcs_9		Abdominal Bending	0	0		427.588
B10_F8	wcs_9		Attempted Copulation	6	0		427.588
B10_F8	wcs_9		Double Wing Extension	0	0		427.588
B10_F8	wcs_9		Following	25	181.093	14.091	427.588
B10_F8	wcs_9		Loss of Righting	0	0		427.588
B10_F8	wcs_9		Successful Copulation	1	0		427.588
B10_F8	wcs_9		Wing Extension	38	82.5686	14.451	427.588
B10_F9	TNTE_dpr12_FruFLP10	male very messed up. Wings held out. Cleaned himself most of video but little LOR	Abdominal Bending	0	0		600
B10_F9	TNTE_dpr12_FruFLP10	male very messed up. Wings held out. Cleaned himself most of video but little LOR	Attempted Copulation	0	0		600
B10_F9	TNTE_dpr12_FruFLP10	male very messed up. Wings held out. Cleaned himself most of video but little LOR	Double Wing Extension	0	0		600
B10_F9	TNTE_dpr12_FruFLP10	male very messed up. Wings held out. Cleaned himself most of video but little LOR	Following	0	0	600	600
B10_F9	TNTE_dpr12_FruFLP10	male very messed up. Wings held out. Cleaned himself most of video but little LOR	Loss of Righting	1	4.921		600
B10_F9	TNTE_dpr12_FruFLP10	male very messed up. Wings held out. Cleaned himself most of video but little LOR	Successful Copulation	0	0		600
B10_F9	TNTE_dpr12_FruFLP10	male very messed up. Wings held out. Cleaned himself most of video but little LOR	Wing Extension	0	0	600	600
B10_G1	TNTQA1_dpr19_FruFLP16		Abdominal Bending	0	0		600
B10_G1	TNTQA1_dpr19_FruFLP16		Attempted Copulation	0	0		600
B10_G1	TNTQA1_dpr19_FruFLP16		Double Wing Extension	0	0		600
B10_G1	TNTQA1_dpr19_FruFLP16		Following	28	267.052	19.537	600
B10_G1	TNTQA1_dpr19_FruFLP16		Loss of Righting	0	0		600
B10_G1	TNTQA1_dpr19_FruFLP16		Successful Copulation	0	0		600
B10_G1	TNTQA1_dpr19_FruFLP16		Wing Extension	27	29.169	29.081	600
B10_G2	wcs_14		Abdominal Bending	0	0		600
B10_G2	wcs_14		Attempted Copulation	10	0		600
B10_G2	wcs_14		Double Wing Extension	0	0		600
B10_G2	wcs_14		Following	6	391.345	67.1702	600
B10_G2	wcs_14		Loss of Righting	0	0		600
B10_G2	wcs_14		Successful Copulation	0	0		600
B10_G2	wcs_14		Wing Extension	54	98.5125	67.3452	600
B10_G3	TNTQA1_DIPeta_FruFLP13		Abdominal Bending	0	0		600
B10_G3	TNTQA1_DIPeta_FruFLP13		Attempted Copulation	0	0		600
B10_G3	TNTQA1_DIPeta_FruFLP13		Double Wing Extension	0	0		600
B10_G3	TNTQA1_DIPeta_FruFLP13		Following	3	15.88	211.764	600
B10_G3	TNTQA1_DIPeta_FruFLP13		Loss of Righting	0	0		600
B10_G3	TNTQA1_DIPeta_FruFLP13		Successful Copulation	0	0		600
B10_G3	TNTQA1_DIPeta_FruFLP13		Wing Extension	3	1.856	215.259	600
B10_G4	TNTQA1_FruFLP_2_11		Abdominal Bending	0	0		600
B10_G4	TNTQA1_FruFLP_2_11		Attempted Copulation	0	0		600
B10_G4	TNTQA1_FruFLP_2_11		Double Wing Extension	0	0		600
B10_G4	TNTQA1_FruFLP_2_11		Following	0	0	600	600
B10_G4	TNTQA1_FruFLP_2_11		Loss of Righting	0	0		600
B10_G4	TNTQA1_FruFLP_2_11		Successful Copulation	0	0		600
B10_G4	TNTQA1_FruFLP_2_11		Wing Extension	0	0	600	600
B10_G5	TNTE_dpr19_FruFLP14		Abdominal Bending	0	0		600
B10_G5	TNTE_dpr19_FruFLP14		Attempted Copulation	4	0		600
B10_G5	TNTE_dpr19_FruFLP14		Double Wing Extension	0	0		600
B10_G5	TNTE_dpr19_FruFLP14		Following	14	347.812	17.865	600
B10_G5	TNTE_dpr19_FruFLP14		Loss of Righting	0	0		600
B10_G5	TNTE_dpr19_FruFLP14		Successful Copulation	0	0		600
B10_G5	TNTE_dpr19_FruFLP14		Wing Extension	41	77.972	21.384	600
B10_G6	wcs_15		Abdominal Bending	0	0		600
B10_G6	wcs_15		Attempted Copulation	1	0		600
B10_G6	wcs_15		Double Wing Extension	0	0		600
B10_G6	wcs_15		Following	11	269.626	10.2018	600
B10_G6	wcs_15		Loss of Righting	0	0		600
B10_G6	wcs_15		Successful Copulation	0	0		600
B10_G6	wcs_15		Wing Extension	34	79.959	17.4178	600
B10_G7	TNTQA1_dpr19_FruFLP12		Abdominal Bending	0	0		269.698
B10_G7	TNTQA1_dpr19_FruFLP12		Attempted Copulation	6	0		269.698
B10_G7	TNTQA1_dpr19_FruFLP12		Double Wing Extension	0	0		269.698
B10_G7	TNTQA1_dpr19_FruFLP12		Following	5	167.682	15.67	269.698
B10_G7	TNTQA1_dpr19_FruFLP12		Loss of Righting	0	0		269.698
B10_G7	TNTQA1_dpr19_FruFLP12		Successful Copulation	1	0		269.698
B10_G7	TNTQA1_dpr19_FruFLP12		Wing Extension	14	25.114	21.766	269.698
B10_G8	CS_2_14		Abdominal Bending	0	0		136.86
B10_G8	CS_2_14		Attempted Copulation	0	0		136.86
B10_G8	CS_2_14		Double Wing Extension	0	0		136.86
B10_G8	CS_2_14		Following	1	73.6095	63.25	136.86
B10_G8	CS_2_14		Loss of Righting	0	0		136.86
B10_G8	CS_2_14		Successful Copulation	1	0		136.86
B10_G8	CS_2_14		Wing Extension	13	39.7594	64.339	136.86
B10_G9	TNTE_dpr19_FruFLP12		Abdominal Bending	1	0.768		600
B10_G9	TNTE_dpr19_FruFLP12		Attempted Copulation	6	0		600
B10_G9	TNTE_dpr19_FruFLP12		Double Wing Extension	0	0		600
B10_G9	TNTE_dpr19_FruFLP12		Following	11	385.685	12.409	600
B10_G9	TNTE_dpr19_FruFLP12		Loss of Righting	0	0		600
B10_G9	TNTE_dpr19_FruFLP12		Successful Copulation	0	0		600
B10_G9	TNTE_dpr19_FruFLP12		Wing Extension	50	98.009	48.917	600
B10_H1	TNTQA1_DIPeta_FruFLP14		Abdominal Bending	0	0		600
B10_H1	TNTQA1_DIPeta_FruFLP14		Attempted Copulation	0	0		600
B10_H1	TNTQA1_DIPeta_FruFLP14		Double Wing Extension	0	0		600
B10_H1	TNTQA1_DIPeta_FruFLP14		Following	11	74.964	2.903	600
B10_H1	TNTQA1_DIPeta_FruFLP14		Loss of Righting	0	0		600
B10_H1	TNTQA1_DIPeta_FruFLP14		Successful Copulation	0	0		600
B10_H1	TNTQA1_DIPeta_FruFLP14		Wing Extension	14	10.659	28.63	600
B10_H2	wcs_12		Abdominal Bending	0	0		600
B10_H2	wcs_12		Attempted Copulation	5	0		600
B10_H2	wcs_12		Double Wing Extension	0	0		600
B10_H2	wcs_12		Following	16	322.266	2.741	600
B10_H2	wcs_12		Loss of Righting	0	0		600
B10_H2	wcs_12		Successful Copulation	0	0		600
B10_H2	wcs_12		Wing Extension	38	64.207	30.853	600
B10_H3	wcs_16		Abdominal Bending	0	0		600
B10_H3	wcs_16		Attempted Copulation	0	0		600
B10_H3	wcs_16		Double Wing Extension	0	0		600
B10_H3	wcs_16		Following	8	53.724	13.359	600
B10_H3	wcs_16		Loss of Righting	0	0		600
B10_H3	wcs_16		Successful Copulation	0	0		600
B10_H3	wcs_16		Wing Extension	2	2.251	406.627	600
B10_H4	wcs_11		Abdominal Bending	0	0		600
B10_H4	wcs_11		Attempted Copulation	0	0		600
B10_H4	wcs_11		Double Wing Extension	0	0		600
B10_H4	wcs_11		Following	31	177.076	1.266	600
B10_H4	wcs_11		Loss of Righting	3	4.744		600
B10_H4	wcs_11		Successful Copulation	0	0		600
B10_H4	wcs_11		Wing Extension	28	52.45	53.913	600
B10_H5	TNTQA1_dpr7_FruFLP10		Abdominal Bending	0	0		600
B10_H5	TNTQA1_dpr7_FruFLP10		Attempted Copulation	2	0		600
B10_H5	TNTQA1_dpr7_FruFLP10		Double Wing Extension	0	0		600
B10_H5	TNTQA1_dpr7_FruFLP10		Following	12	211.159	147.009	600
B10_H5	TNTQA1_dpr7_FruFLP10		Loss of Righting	0	0		600
B10_H5	TNTQA1_dpr7_FruFLP10		Successful Copulation	0	0		600
B10_H5	TNTQA1_dpr7_FruFLP10		Wing Extension	13	16.106	147.217	600
B10_H6	TNTQA1_dpr7_FruFLP16		Abdominal Bending	0	0		600
B10_H6	TNTQA1_dpr7_FruFLP16		Attempted Copulation	0	0		600
B10_H6	TNTQA1_dpr7_FruFLP16		Double Wing Extension	0	0		600
B10_H6	TNTQA1_dpr7_FruFLP16		Following	6	27.283	5.018	600
B10_H6	TNTQA1_dpr7_FruFLP16		Loss of Righting	0	0		600
B10_H6	TNTQA1_dpr7_FruFLP16		Successful Copulation	0	0		600
B10_H6	TNTQA1_dpr7_FruFLP16		Wing Extension	1	0.64	117.497	600
B10_H7	TNTQA1_FruFLP_2_14		Abdominal Bending	0	0		396.401
B10_H7	TNTQA1_FruFLP_2_14		Attempted Copulation	1	0		396.401
B10_H7	TNTQA1_FruFLP_2_14		Double Wing Extension	0	0		396.401
B10_H7	TNTQA1_FruFLP_2_14		Following	11	216.744	1.939	396.401
B10_H7	TNTQA1_FruFLP_2_14		Loss of Righting	0	0		396.401
B10_H7	TNTQA1_FruFLP_2_14		Successful Copulation	1	0		396.401
B10_H7	TNTQA1_FruFLP_2_14		Wing Extension	39	67.4214	5.216	396.401
B10_H8	TNTQA1_dpr19_FruFLP9		Abdominal Bending	0	0		600
B10_H8	TNTQA1_dpr19_FruFLP9		Attempted Copulation	0	0		600
B10_H8	TNTQA1_dpr19_FruFLP9		Double Wing Extension	0	0		600
B10_H8	TNTQA1_dpr19_FruFLP9		Following	12	65.3635	8.451	600
B10_H8	TNTQA1_dpr19_FruFLP9		Loss of Righting	0	0		600
B10_H8	TNTQA1_dpr19_FruFLP9		Successful Copulation	0	0		600
B10_H8	TNTQA1_dpr19_FruFLP9		Wing Extension	2	3.186	36.1295	600
B10_H9	TNTE_FruFLP_2_9		Abdominal Bending	0	0		600
B10_H9	TNTE_FruFLP_2_9		Attempted Copulation	2	0		600
B10_H9	TNTE_FruFLP_2_9		Double Wing Extension	0	0		600
B10_H9	TNTE_FruFLP_2_9		Following	10	468.375	63.5926	600
B10_H9	TNTE_FruFLP_2_9		Loss of Righting	0	0		600
B10_H9	TNTE_FruFLP_2_9		Successful Copulation	0	0		600
B10_H9	TNTE_FruFLP_2_9		Wing Extension	41	44.38	98.0406	600
B10_J1	TNTE_dpr7_FruFLP9		Abdominal Bending	0	0		600
B10_J1	TNTE_dpr7_FruFLP9		Attempted Copulation	0	0		600
B10_J1	TNTE_dpr7_FruFLP9		Double Wing Extension	0	0		600
B10_J1	TNTE_dpr7_FruFLP9		Following	23	430.806	6.259	600
B10_J1	TNTE_dpr7_FruFLP9		Loss of Righting	0	0		600
B10_J1	TNTE_dpr7_FruFLP9		Successful Copulation	0	0		600
B10_J1	TNTE_dpr7_FruFLP9		Wing Extension	44	47.261	22.957	600
B10_J2	TNTE_dpr7_FruFLP10		Abdominal Bending	1	2.214		600
B10_J2	TNTE_dpr7_FruFLP10		Attempted Copulation	0	0		600
B10_J2	TNTE_dpr7_FruFLP10		Double Wing Extension	0	0		600
B10_J2	TNTE_dpr7_FruFLP10		Following	28	263.726	43.046	600
B10_J2	TNTE_dpr7_FruFLP10		Loss of Righting	0	0		600
B10_J2	TNTE_dpr7_FruFLP10		Successful Copulation	0	0		600
B10_J2	TNTE_dpr7_FruFLP10		Wing Extension	68	87.323	43.246	600
B10_J3	TNTE_dpr7_FruFLP11		Abdominal Bending	0	0		600
B10_J3	TNTE_dpr7_FruFLP11		Attempted Copulation	0	0		600
B10_J3	TNTE_dpr7_FruFLP11		Double Wing Extension	0	0		600
B10_J3	TNTE_dpr7_FruFLP11		Following	17	499.078	17.421	600
B10_J3	TNTE_dpr7_FruFLP11		Loss of Righting	0	0		600
B10_J3	TNTE_dpr7_FruFLP11		Successful Copulation	0	0		600
B10_J3	TNTE_dpr7_FruFLP11		Wing Extension	116	159.487	22.654	600
B10_J4	TNTE_dpr7_FruFLP12		Abdominal Bending	0	0		600
B10_J4	TNTE_dpr7_FruFLP12		Attempted Copulation	0	0		600
B10_J4	TNTE_dpr7_FruFLP12		Double Wing Extension	0	0		600
B10_J4	TNTE_dpr7_FruFLP12		Following	31	300.247	1.608	600
B10_J4	TNTE_dpr7_FruFLP12		Loss of Righting	0	0		600
B10_J4	TNTE_dpr7_FruFLP12		Successful Copulation	0	0		600
B10_J4	TNTE_dpr7_FruFLP12		Wing Extension	51	66.846	9.447	600
B10_J5	TNTE_dpr7_FruFLP13		Abdominal Bending	1	0.517		600
B10_J5	TNTE_dpr7_FruFLP13		Attempted Copulation	0	0		600
B10_J5	TNTE_dpr7_FruFLP13		Double Wing Extension	0	0		600
B10_J5	TNTE_dpr7_FruFLP13		Following	12	272.682	28.493	600
B10_J5	TNTE_dpr7_FruFLP13		Loss of Righting	0	0		600
B10_J5	TNTE_dpr7_FruFLP13		Successful Copulation	0	0		600
B10_J5	TNTE_dpr7_FruFLP13		Wing Extension	40	99.861	38.484	600
B10_J6	TNTE_dpr7_FruFLP14		Abdominal Bending	0	0		600
B10_J6	TNTE_dpr7_FruFLP14		Attempted Copulation	2	0		600
B10_J6	TNTE_dpr7_FruFLP14		Double Wing Extension	0	0		600
B10_J6	TNTE_dpr7_FruFLP14		Following	17	377.263	12.9845	600
B10_J6	TNTE_dpr7_FruFLP14		Loss of Righting	0	0		600
B10_J6	TNTE_dpr7_FruFLP14		Successful Copulation	0	0		600
B10_J6	TNTE_dpr7_FruFLP14		Wing Extension	62	100.999	13.2105	600
B10_J7	TNTE_dpr7_FruFLP15		Abdominal Bending	1	2.104		285.622
B10_J7	TNTE_dpr7_FruFLP15		Attempted Copulation	1	0		285.622
B10_J7	TNTE_dpr7_FruFLP15		Double Wing Extension	0	0		285.622
B10_J7	TNTE_dpr7_FruFLP15		Following	9	204.61	14.248	285.622
B10_J7	TNTE_dpr7_FruFLP15		Loss of Righting	0	0		285.622
B10_J7	TNTE_dpr7_FruFLP15		Successful Copulation	1	0		285.622
B10_J7	TNTE_dpr7_FruFLP15		Wing Extension	37	57.6142	34.135	285.622
B10_J8	TNTE_dpr7_FruFLP16		Abdominal Bending	3	3.201		600
B10_J8	TNTE_dpr7_FruFLP16		Attempted Copulation	0	0		600
B10_J8	TNTE_dpr7_FruFLP16		Double Wing Extension	0	0		600
B10_J8	TNTE_dpr7_FruFLP16		Following	13	502.581	8.243	600
B10_J8	TNTE_dpr7_FruFLP16		Loss of Righting	0	0		600
B10_J8	TNTE_dpr7_FruFLP16		Successful Copulation	0	0		600
B10_J8	TNTE_dpr7_FruFLP16		Wing Extension	72	143.558	25.996	600
B2_A1	TNTQA1_dpr16_FruFLP16		Abdominal Bending	0	0		600
B2_A1	TNTQA1_dpr16_FruFLP16		Attempted Copulation	1	0		600
B2_A1	TNTQA1_dpr16_FruFLP16		Double Wing Extension	0	0		600
B2_A1	TNTQA1_dpr16_FruFLP16		Following	14	271.145	0.767	600
B2_A1	TNTQA1_dpr16_FruFLP16		Loss of Righting	0	0		600
B2_A1	TNTQA1_dpr16_FruFLP16		Successful Copulation	0	0		600
B2_A1	TNTQA1_dpr16_FruFLP16		Wing Extension	29	72.899	29.3503	600
B2_A2	TNTE_dpr5_FruFLP16		Abdominal Bending	0	0		600
B2_A2	TNTE_dpr5_FruFLP16		Attempted Copulation	0	0		600
B2_A2	TNTE_dpr5_FruFLP16		Double Wing Extension	0	0		600
B2_A2	TNTE_dpr5_FruFLP16		Following	0	0	600	600
B2_A2	TNTE_dpr5_FruFLP16		Loss of Righting	32	219.04		600
B2_A2	TNTE_dpr5_FruFLP16		Successful Copulation	0	0		600
B2_A2	TNTE_dpr5_FruFLP16		Wing Extension	0	0	600	600
B2_A3	TNTQA1_dpr16_FruFLP12		Abdominal Bending	0	0		600
B2_A3	TNTQA1_dpr16_FruFLP12		Attempted Copulation	1	0		600
B2_A3	TNTQA1_dpr16_FruFLP12		Double Wing Extension	0	0		600
B2_A3	TNTQA1_dpr16_FruFLP12		Following	32	192.544	18.515	600
B2_A3	TNTQA1_dpr16_FruFLP12		Loss of Righting	0	0		600
B2_A3	TNTQA1_dpr16_FruFLP12		Successful Copulation	0	0		600
B2_A3	TNTQA1_dpr16_FruFLP12		Wing Extension	38	55.222	35.608	600
B2_A4	TNTQA1_dpr16_FruFLP14		Abdominal Bending	0	0		600
B2_A4	TNTQA1_dpr16_FruFLP14		Attempted Copulation	0	0		600
B2_A4	TNTQA1_dpr16_FruFLP14		Double Wing Extension	0	0		600
B2_A4	TNTQA1_dpr16_FruFLP14		Following	3	16.91	8.675	600
B2_A4	TNTQA1_dpr16_FruFLP14		Loss of Righting	0	0		600
B2_A4	TNTQA1_dpr16_FruFLP14		Successful Copulation	0	0		600
B2_A4	TNTQA1_dpr16_FruFLP14		Wing Extension	2	2.494	142.058	600
B2_A5	TNTE_dpr5_FruFLP14		Abdominal Bending	0	0		600
B2_A5	TNTE_dpr5_FruFLP14		Attempted Copulation	0	0		600
B2_A5	TNTE_dpr5_FruFLP14		Double Wing Extension	0	0		600
B2_A5	TNTE_dpr5_FruFLP14		Following	0	0	600	600
B2_A5	TNTE_dpr5_FruFLP14		Loss of Righting	22	370.196		600
B2_A5	TNTE_dpr5_FruFLP14		Successful Copulation	0	0		600
B2_A5	TNTE_dpr5_FruFLP14		Wing Extension	0	0	600	600
B2_A6	TNTE_dpr16_FruFLP16	No obvious motor defects but also not interested in courting female	Abdominal Bending	0	0		600
B2_A6	TNTE_dpr16_FruFLP16	No obvious motor defects but also not interested in courting female	Attempted Copulation	1	0		600
B2_A6	TNTE_dpr16_FruFLP16	No obvious motor defects but also not interested in courting female	Double Wing Extension	0	0		600
B2_A6	TNTE_dpr16_FruFLP16	No obvious motor defects but also not interested in courting female	Following	2	12.865	469.441	600
B2_A6	TNTE_dpr16_FruFLP16	No obvious motor defects but also not interested in courting female	Loss of Righting	0	0		600
B2_A6	TNTE_dpr16_FruFLP16	No obvious motor defects but also not interested in courting female	Successful Copulation	0	0		600
B2_A6	TNTE_dpr16_FruFLP16	No obvious motor defects but also not interested in courting female	Wing Extension	4	2.896	470.168	600
B2_A7	TNTE_dpr5_FruFLP9		Abdominal Bending	0	0		600
B2_A7	TNTE_dpr5_FruFLP9		Attempted Copulation	0	0		600
B2_A7	TNTE_dpr5_FruFLP9		Double Wing Extension	0	0		600
B2_A7	TNTE_dpr5_FruFLP9		Following	0	0	600	600
B2_A7	TNTE_dpr5_FruFLP9		Loss of Righting	15	157.948		600
B2_A7	TNTE_dpr5_FruFLP9		Successful Copulation	0	0		600
B2_A7	TNTE_dpr5_FruFLP9		Wing Extension	0	0	600	600
B2_A8	TNTE_dpr16_FruFLP9		Abdominal Bending	0	0		408.868
B2_A8	TNTE_dpr16_FruFLP9		Attempted Copulation	1	0		408.868
B2_A8	TNTE_dpr16_FruFLP9		Double Wing Extension	0	0		408.868
B2_A8	TNTE_dpr16_FruFLP9		Following	14	293.755	13.487	408.868
B2_A8	TNTE_dpr16_FruFLP9		Loss of Righting	0	0		408.868
B2_A8	TNTE_dpr16_FruFLP9		Successful Copulation	1	0		408.868
B2_A8	TNTE_dpr16_FruFLP9		Wing Extension	38	69.3405	24.267	408.868
B2_B1	TNTE_dpr16_FruFLP10		Abdominal Bending	0	0		600
B2_B1	TNTE_dpr16_FruFLP10		Attempted Copulation	0	0		600
B2_B1	TNTE_dpr16_FruFLP10		Double Wing Extension	0	0		600
B2_B1	TNTE_dpr16_FruFLP10		Following	9	137.856	0.72	600
B2_B1	TNTE_dpr16_FruFLP10		Loss of Righting	0	0		600
B2_B1	TNTE_dpr16_FruFLP10		Successful Copulation	0	0		600
B2_B1	TNTE_dpr16_FruFLP10		Wing Extension	9	14.776	5.141	600
B2_B2	TNTE_dpr16_FruFLP12	No obvious motor defects but also not interested in courting female	Abdominal Bending	0	0		600
B2_B2	TNTE_dpr16_FruFLP12	No obvious motor defects but also not interested in courting female	Attempted Copulation	0	0		600
B2_B2	TNTE_dpr16_FruFLP12	No obvious motor defects but also not interested in courting female	Double Wing Extension	0	0		600
B2_B2	TNTE_dpr16_FruFLP12	No obvious motor defects but also not interested in courting female	Following	4	22.2586	3.059	600
B2_B2	TNTE_dpr16_FruFLP12	No obvious motor defects but also not interested in courting female	Loss of Righting	0	0		600
B2_B2	TNTE_dpr16_FruFLP12	No obvious motor defects but also not interested in courting female	Successful Copulation	0	0		600
B2_B2	TNTE_dpr16_FruFLP12	No obvious motor defects but also not interested in courting female	Wing Extension	2	0.906	389.745	600
B2_B3	TNTE_dpr5_FruFLP13	spent a lot of time cleaning himself	Abdominal Bending	0	0		600
B2_B3	TNTE_dpr5_FruFLP13	spent a lot of time cleaning himself	Attempted Copulation	0	0		600
B2_B3	TNTE_dpr5_FruFLP13	spent a lot of time cleaning himself	Double Wing Extension	0	0		600
B2_B3	TNTE_dpr5_FruFLP13	spent a lot of time cleaning himself	Following	3	14.296	79.919	600
B2_B3	TNTE_dpr5_FruFLP13	spent a lot of time cleaning himself	Loss of Righting	4	18.885		600
B2_B3	TNTE_dpr5_FruFLP13	spent a lot of time cleaning himself	Successful Copulation	0	0		600
B2_B3	TNTE_dpr5_FruFLP13	spent a lot of time cleaning himself	Wing Extension	0	0	600	600
B2_B4	TNTQA1_dpr16_FruFLP10		Abdominal Bending	0	0		600
B2_B4	TNTQA1_dpr16_FruFLP10		Attempted Copulation	1	0		600
B2_B4	TNTQA1_dpr16_FruFLP10		Double Wing Extension	1	3.016		600
B2_B4	TNTQA1_dpr16_FruFLP10		Following	4	58.2085	398.278	600
B2_B4	TNTQA1_dpr16_FruFLP10		Loss of Righting	0	0		600
B2_B4	TNTQA1_dpr16_FruFLP10		Successful Copulation	0	0		600
B2_B4	TNTQA1_dpr16_FruFLP10		Wing Extension	6	9.593	401.637	600
B2_B5	TNTE_dpr16_FruFLP11	abdomin bobbing when not near female	Abdominal Bending	6	4.05603		600
B2_B5	TNTE_dpr16_FruFLP11	abdomin bobbing when not near female	Attempted Copulation	5	0		600
B2_B5	TNTE_dpr16_FruFLP11	abdomin bobbing when not near female	Double Wing Extension	2	3.499		600
B2_B5	TNTE_dpr16_FruFLP11	abdomin bobbing when not near female	Following	19	441.397	6.59	600
B2_B5	TNTE_dpr16_FruFLP11	abdomin bobbing when not near female	Loss of Righting	0	0		600
B2_B5	TNTE_dpr16_FruFLP11	abdomin bobbing when not near female	Successful Copulation	0	0		600
B2_B5	TNTE_dpr16_FruFLP11	abdomin bobbing when not near female	Wing Extension	106	153.809	12.8105	600
B2_B6	TNTE_dpr5_FruFLP10	doesn’t move around a lot (stays still) but no obvious motor defect	Abdominal Bending	0	0		600
B2_B6	TNTE_dpr5_FruFLP10	doesn’t move around a lot (stays still) but no obvious motor defect	Attempted Copulation	0	0		600
B2_B6	TNTE_dpr5_FruFLP10	doesn’t move around a lot (stays still) but no obvious motor defect	Double Wing Extension	0	0		600
B2_B6	TNTE_dpr5_FruFLP10	doesn’t move around a lot (stays still) but no obvious motor defect	Following	5	59.3998	19.8764	600
B2_B6	TNTE_dpr5_FruFLP10	doesn’t move around a lot (stays still) but no obvious motor defect	Loss of Righting	0	0		600
B2_B6	TNTE_dpr5_FruFLP10	doesn’t move around a lot (stays still) but no obvious motor defect	Successful Copulation	0	0		600
B2_B6	TNTE_dpr5_FruFLP10	doesn’t move around a lot (stays still) but no obvious motor defect	Wing Extension	7	26.9098	115.494	600
B2_B7	TNTE_dpr5_FruFLP15		Abdominal Bending	0	0		600
B2_B7	TNTE_dpr5_FruFLP15		Attempted Copulation	0	0		600
B2_B7	TNTE_dpr5_FruFLP15		Double Wing Extension	0	0		600
B2_B7	TNTE_dpr5_FruFLP15		Following	0	0	600	600
B2_B7	TNTE_dpr5_FruFLP15		Loss of Righting	19	470.766		600
B2_B7	TNTE_dpr5_FruFLP15		Successful Copulation	0	0		600
B2_B7	TNTE_dpr5_FruFLP15		Wing Extension	0	0	600	600
[truncated: 6,111 more rows]

## Sheet: 5. TNT DAM
														Genotype	number of line crossings over 24hrs						Blinded Genotype Name			C	T	T	T	R	R	R	R	R	R	R	O	O	O	O	O	O	O	O	O	Q	Q	Q	D	D	D
[truncated: 529 more rows]
[truncated: 502 more columns]
