# Supplementary material for: Investigation of Drosophila fruitless neurons that express Dpr/DIP cell adhesion molecules
Source: eLife. 2021 Feb 22;10:e63101. doi: 10.7554/eLife.63101 (PMC7972454; doi:10.7554/eLife.63101)
Supplement: Source data 4. — Data tables of quantification of confocal data from sex hierarchy perturbations in fru P1 ∩ DIP-α neurons. This excel file has the quantification from the sex hierarchy perturbation analyses, with the following sheets: 1. Read Me: This first sheet is to explain the following tabs and to display the features scored. Representative confocal 3D projections are shown below. 2. Genotype and Condition: Description of genotypes, conditions, expected perturbations and changes. 3A. Scoring Summary of set one overexpressors: Overexpression of sex hierarchy related genes in ALL DIP-α cells plus a loss-of-function line (Control: DIP-α-GAL4; UAS>stop>GFP.Myr/+; fruFLP/+). 3B. The corresponding scoring raw data of 4A. 4A. Scoring Summary of set two overexpressors (with tubGal80): Overexpression of sex hierarchy related genes in DIP-α and fru P1 intersecting cells. (Control: DIP-α-GAL4; UAS>stop>GFP.Myr/+; fruFLP/tub>GAL80>). 4B. The corresponding scoring raw data of 5A (with tubGal80). 5. The conclusive tables of all scoring data and the corresponding statistics (p values from Fisher's Exact test; when p ≦ 0.05, the cell will be highlighted). 6. Confocal images showing staining controls: UAS-FruM constructs and expression pattern of Dip-alpha with UAS-GFP. [file elife-63101-data4.xlsx]

## Sheet: 1. Read Me
This excel file has the following sections: 1. Read Me: This first sheet is to explain the following tabs and to display the features scored. Representative confocal 3D projections are shown below. 2. Genotype and Condition: Description of genotypes, conditions, expected perturbations and changes. 3A. Scoring Summary of set 1 overexpressors: Overexpression of sex hierarchy related genes in ALL DI…

## Sheet: 2. Genotype and Condition
Description of genotypes, conditions, expected changes and perturbations in this experiment.
Genotype	Temperature raised (°C)	Age	Visualized Pattern	Change of Expression	Expected Perturbation
Loss of Function
DIP-⍺-GAL4; UAS>stop>GFP.Myr/+; fruFLP/+	25	4-7 DAYS	DIP-⍺ and fru P1 intersecting neurons	Control	No Sex Hierarchy Perturbation
DIP-⍺-GAL4; UAS>stop>GFP.Myr/+; fruFLP/fru△C	25	4-7 DAYS	DIP-⍺ and fru P1 intersecting neurons	FruMC deletion in all Fru P1 neurons	Demasculinizing all fru P1 neurons
Overexpressor Set 1
DIP-⍺-GAL4; UAS>stop>GFP.Myr/+; fruFLP/+	25	4-7 DAYS	DIP-⍺ and fru P1 intersecting neurons	Control	No Sex Hierarchy Perturbation
DIP-⍺-GAL4; UAS>stop>GFP.Myr/UAS-TraF; fruFLP/+	25	4-7 DAYS	DIP-⍺ and fru P1 intersecting neurons	TraF overexpression in all DIP-⍺ neurons	Feminizing all DIP-⍺ neurons
DIP-⍺-GAL4; UAS>stop>GFP.MyrUAS-FruMA; fruFLP/+	25	4-7 DAYS	DIP-⍺ and fru P1 intersecting neurons	FruMA overexpression in all DIP-⍺ neurons	Masculinizing/Defeminizing all DIP-⍺ neurons
DIP-⍺-GAL4; UAS>stop>GFP.Myr/UAS-FruMB; fruFLP/+	25	4-7 DAYS	DIP-⍺ and fru P1 intersecting neurons	FruMB overexpression in all DIP-⍺ neurons	Masculinizing/Defeminizing all DIP-⍺ neurons
DIP-⍺-GAL4; UAS>stop>GFP.Myr/UAS-FruMC; fruFLP/+	25	4-7 DAYS	DIP-⍺ and fru P1 intersecting neurons	FruMC overexpression in all DIP-⍺ neurons	Masculinizing/Defeminizing all DIP-⍺ neurons
Overexpressor Set 2 (with tubGal80)
DIP-⍺-GAL4; UAS>stop>GFP.Myr/+; fruFLP/tub>GAL80>	25	4-7 DAYS	DIP-⍺ and fru P1 intersecting neurons	Control: GAL80 expression in all neurons except Fru P1 neurons	No Sex Hierarchy Perturbation
DIP-⍺-GAL4; UAS>stop>GFP.Myr/UAS-TraF; fruFLP/tub>GAL80>	25	4-7 DAYS	DIP-⍺ and fru P1 intersecting neurons	TraF overexpression in DIP-⍺ and fru P1 intersecting neurons	Feminizing DIP-⍺ and fru P1 intersecting neurons
DIP-⍺-GAL4; UAS>stop>GFP.Myr/UAS-FruMA; fruFLP/tub>GAL80>	25	4-7 DAYS	DIP-⍺ and fru P1 intersecting neurons	FruMA overexpression in DIP-⍺ and fru P1 intersecting neurons	Masculinizing/Defeminizing DIP-⍺ and fru P1 intersecting neurons
DIP-⍺-GAL4; UAS>stop>GFP.Myr/UAS-FruMB; fruFLP/tub>GAL80>	25	4-7 DAYS	DIP-⍺ and fru P1 intersecting neurons	FruMB overexpression in DIP-⍺ and fru P1 intersecting neurons	Masculinizing/Defeminizing DIP-⍺ and fru P1 intersecting neurons
DIP-⍺-GAL4; UAS>stop>GFP.Myr/UAS-FruMC; fruFLP/tub>GAL80>	25	4-7 DAYS	DIP-⍺ and fru P1 intersecting neurons	FruMC overexpression in DIP-⍺ and fru P1 intersecting neurons	Masculinizing/Defeminizing DIP-⍺ and fru P1 intersecting neurons

## Sheet: 3A. Overexpressor Summary 1
Summary of set 1 of the sccoring of overexpressors: Overexpression of sex hierarchy related genes in ALL DIP-⍺ cells plus a loss-of-function line. (Control: DIP-⍺-GAL4; UAS>stop>GFP.Myr/+; fruFLP/+)
		Projection pattern in AbG of VNC	"U" shaped projection pattern & number of neuron body in SEG	Lateral assending projection in VLP	"Square" shaped projection pattern in VLP	"M" shaped projection pattern above AL in the Medial Part of Midbrain	Horizontal projection in the Medial Part of Midbrain	Protocerebral projection in SMP	mAL neuron
Genotype	Sex	Male-Like Pattern (M) vs No signal(X) vs Female-Like Pattern (F)	Presence of U shaped pattern (P), Absense of pattern (A); Number (#) of neuron body	Number (#) of lateral assending projection	Absense (A) vs Presence (P) of "Square" shaped pattern	Number of samples with M pattern/ Number of total sample size	Male-Like Pattern (M) vs No signal (X) vs Female-Like Pattern (F)	Male-Like Pattern (M) vs Female-Like Pattern (F)	Number of samples with at least 1 mAL neuron/ Number of total sample size
DIP-⍺-GAL4; UAS>stop>GFP.Myr/+; fruFLP/+	M	M 20/20; X 0/20; F 0/20	P 17/18; A 1/18; 0 neuron 15/18; 1 neuron 3/18	0 neuron 14/18; 1 neuron 4/18	A 11/18; P 7/18	M 6/18	M 17/18; X 0/18; F 1/18	M 17/18; F 1/18	mAL 2/17
DIP-⍺-GAL4; UAS>stop>GFP.Myr/+; fruFLP/+	F	M 1/18; X 1/18; F 16/18	P 16/16; A 0/16; 0 neuron 6/16; 1 neuron 7/16; 2 neurons 3/16	0 neuron 14/16; 1 neuron 2/16	A 3/16; P 13/16	M 0/16	M 0/16; X 0/16; F 16/16	M 0/16; F 16/16	mAL 1/16
DIP-⍺-GAL4; UAS>stop>GFP.Myr/+; fruFLP/fru△C	M	M 15/15; X 0/15; F 0/15	P 20/20; A 0/20; 0 neuron 13/20; 1 neuron 7/20	0 neuron 9/20; 1 neuron 11/20	A 12/20; P 7/20	M 6/20	M 18/20; X 0/20; F 2/20	M 9/20; F 11/20	mAL 1/20
DIP-⍺-GAL4; UAS>stop>GFP.Myr/+; fruFLP/fru△C	F	M 0/18; X 2/18; F 16/18	P 18/18; A 0/18; 0 neuron 8/18; 1 neuron 8/18; 2 neurons 2/18	0 neuron 14/18; 1 neuron 4/18	A 0/18; P 18/18	M 1/18	M 0/18; X 0/18; F 18/18	M 2/18; F 16/18	mAL 1/18
DIP-⍺-GAL4; UAS>stop>GFP.Myr/UAS-TraF; fruFLP/+	M	M 8/16; X 3/16; F 5/16	P 14/15; A 1/15; 0 neuron 9/15; 1 neuron 6/15	0 neuron 7/15; 1 neuron 8/15	A 4/14; P 10/14	M 4/14	M 7/14; X 3/14; F 4/14	M 0/14; F 14/14	mAL 0/14
DIP-⍺-GAL4; UAS>stop>GFP.Myr/UAS-TraF; fruFLP/+	F	M 0/16; X 1/16; F 15/16	P 15/16; A 1/16; 0 neuron 5/16; 1 neuron 11/16	0 neuron 8/16; 1 neuron 6/16; 2 neurons 2/16	A 9/16; P 7/16	M 0/16	M 2/16; X 5/16; F 9/16	M 1/16; F 15/16	mAL 0/16
DIP-⍺-GAL4; UAS>stop>GFP.MyrUAS-FruMA; fruFLP/+	M	M 18/20; X 2/20; F 0/20	P 15/18; A 3/18; 0 neuron 15/18; 1 neuron 3/18	0 neuron 17/18; 1 neuron 1/18	A 18/18; P 0/18	M 7/18	M 15/18; X 1/18; F 2/18	M 17/18; F 1/18	mAL 6/18
DIP-⍺-GAL4; UAS>stop>GFP.MyrUAS-FruMA; fruFLP/+	F	M 2/13; X 1/13; F 10/13	P 13/16; A 3/16; 0 neuron 8/16; 1 neuron 6/16; 2 neuron 2/16	0 neuron 15/16; 1 neuron 1/16	A 5/16; P 11/16	M 0/16	M 1/15; X 0/15; F 14/15	M 2/16; F 14/16	mAL 0/16
DIP-⍺-GAL4; UAS>stop>GFP.Myr/UAS-FruMB; fruFLP/+	M	M 11/15; X 3/15; F 1/15	P 0/16; A 16/16; 0 neuron 15/16, 1 neuron 1/16	0 neuron 15/16; 2 neuron 1/16	A 16/16; P 0/16	M 15/16	M 16/16; X 0/16; F 0/16	M 16/16; F 0/16	mAL 1/16
DIP-⍺-GAL4; UAS>stop>GFP.Myr/UAS-FruMB; fruFLP/+	F	M 3/16; X 1/16; F 12/16	P 13/15; A 2/15; 0 neruon 3/15; 1 neuron 5/15; 2 neuron 7/15	0 neuron 3/15; 1 neuron 2/15; 2 neuron 7/15; 3 neuron 3/15	A 7/15; P 8/15	M 0/15	M 0/15; X 0/15; F 15/15	M 0/15; F 15/15	mAL 1/15
DIP-⍺-GAL4; UAS>stop>GFP.Myr/UAS-FruMC; fruFLP/+	M	M 9/16; X 7/16; F 0/16	P 0/16; A 16/16; 0 neuron 16/16	0 neuron 13/16; 1 neuron 3/16	A 13/16; P 3/16	M 0/16	M 0/16; X 16/16; F 0/16	M 14/16; F 2/16	mAL 4/16
DIP-⍺-GAL4; UAS>stop>GFP.Myr/UAS-FruMC; fruFLP/+	F	M 1/16; X 1/16; F 14/16	P 7/15; A 8/15; 0 neuron 10/15; 1 neuron 5/15	0 neuron 14/15; 1 neuron 1/15	A 9/15; P 6/15	M 0/15	M 0/15; X 8/15; F 7/15	M 1/15; F 14/15	mAL 6/15
*** fraction: (number of samples with described pattern) / (total number of samples scored)
The next tab: the corresponding Scoring Raw Data

## Sheet: 3B. Scoring Raw Data
In the scoring raw data sheet: Each letter (like "M", "F", "X", "U", etc.) is the abbreviations of a specific pattern in different VNC or brain regions (check the details shown in red); Each number represents how many described projection patterns or neuron bodies scored in each tissue sample.
Control			Projection pattern in AbG of VNC	U shaped projection pattern & number of neuron body in SEG	Lateral assending projection in VLP	Square shaped projection pattern in VLP	M shaped projection pattern above AL in the Medial Part of Midbrain	Horizontal projection in the Medial Part of Midbrain	Protocerebral projection in SMP	mAL neuron		Lab Internal Notation
Genotype	Sex	Sample	Male-Like Pattern (M) vs No signal (X) vs Female-Like Pattern (F)	Presence of U shaped pattern (U), Absense of signal (X); Number (#) of neuron bodies	Number (#) of lateral assending projections	Absense (A) vs Presence (P) of Square shaped pattern, Number (#) of the corresponding neuron bodies	Presence of M shaped projection pattern (YES/NO)	Male-Like Pattern (M) vs No signal (X) vs Female-Like Pattern (F)	Male-Like Pattern (M) vs Female-Like Pattern (F)	Number (#) of mAL neurons		File Name	Blind Number
DIP-⍺-GAL4; UAS>stop>GFP.Myr/+; fruFLP/+	Male	VNC	M									6d_male_vnc_DIP⍺_55810_fruFLP_6	B1-A4
DIP-⍺-GAL4; UAS>stop>GFP.Myr/+; fruFLP/+	Male	VNC	M									6d_male_vnc_DIP⍺_55810_fruFLP_15	B1-B5
DIP-⍺-GAL4; UAS>stop>GFP.Myr/+; fruFLP/+	Male	VNC	M									6d_male_vnc_DIP⍺_55810_fruFLP_19	B1-D9
DIP-⍺-GAL4; UAS>stop>GFP.Myr/+; fruFLP/+	Male	VNC	M									6d_male_vnc_DIP⍺_55810_fruFLP_16	B1-F5
DIP-⍺-GAL4; UAS>stop>GFP.Myr/+; fruFLP/+	Male	VNC	M									6d_male_vnc_DIP⍺_55810_fruFLP_4_20181106	B1-H1
DIP-⍺-GAL4; UAS>stop>GFP.Myr/+; fruFLP/+	Male	VNC	M									6d_male_vnc_DIP⍺_55810_fruFLP_8	B1-M3
DIP-⍺-GAL4; UAS>stop>GFP.Myr/+; fruFLP/+	Male	VNC	M									6d_male_vnc_DIP⍺_55810_fruFLP_17	B1-Q9
DIP-⍺-GAL4; UAS>stop>GFP.Myr/+; fruFLP/+	Male	VNC	M									6d_male_vnc_DIP⍺_55810_fruFLP_5_20181106	B1-V4
DIP-⍺-GAL4; UAS>stop>GFP.Myr/+; fruFLP/+	Male	VNC	M									6d_male_vnc_DIP⍺_55810_fruFLP_3_20181106	B1-W2
DIP-⍺-GAL4; UAS>stop>GFP.Myr/+; fruFLP/+	Male	VNC	M									6d_male_vnc_DIP⍺_55810_fruFLP_12	B1-X9
DIP-⍺-GAL4; UAS>stop>GFP.Myr/+; fruFLP/+	Male	VNC	M									6d_male_vnc_DIP⍺_55810_fruFLP_1_20181106	B2-A2
DIP-⍺-GAL4; UAS>stop>GFP.Myr/+; fruFLP/+	Male	VNC	M									6d_male_vnc_DIP⍺_55810_fruFLP_10	B2-A9
DIP-⍺-GAL4; UAS>stop>GFP.Myr/+; fruFLP/+	Male	VNC	M									6d_male_vnc_DIP⍺_55810_fruFLP_9	B2-B6
DIP-⍺-GAL4; UAS>stop>GFP.Myr/+; fruFLP/+	Male	VNC	M									6d_male_vnc_DIP⍺_55810_fruFLP_14	B2-C1
DIP-⍺-GAL4; UAS>stop>GFP.Myr/+; fruFLP/+	Male	VNC	M									6d_male_vnc_DIP⍺_55810_fruFLP_13	B2-D2
DIP-⍺-GAL4; UAS>stop>GFP.Myr/+; fruFLP/+	Male	VNC	M									6d_male_vnc_DIP⍺_55810_fruFLP_20	B2-F9
DIP-⍺-GAL4; UAS>stop>GFP.Myr/+; fruFLP/+	Male	VNC	M									6d_male_vnc_DIP⍺_55810_fruFLP_18	B2-K7
DIP-⍺-GAL4; UAS>stop>GFP.Myr/+; fruFLP/+	Male	VNC	M									6d_male_vnc_DIP⍺_55810_fruFLP_7	B2-O2
DIP-⍺-GAL4; UAS>stop>GFP.Myr/+; fruFLP/+	Male	VNC	M									6d_male_vnc_DIP⍺_55810_fruFLP_11	B2-Q2
DIP-⍺-GAL4; UAS>stop>GFP.Myr/+; fruFLP/+	Male	VNC	M									6d_male_vnc_DIP⍺_55810_fruFLP_2_20181106	B2-R1
DIP-⍺-GAL4; UAS>stop>GFP.Myr/+; fruFLP/+	Female	VNC	F									6d_female_vnc_DIP⍺_55810_fruFLP_13	B1-E5
DIP-⍺-GAL4; UAS>stop>GFP.Myr/+; fruFLP/+	Female	VNC	F									6d_female_vnc_DIP⍺_55810_fruFLP_9	B1-E9
DIP-⍺-GAL4; UAS>stop>GFP.Myr/+; fruFLP/+	Female	VNC	F									6d_female_vnc_DIP⍺_55810_fruFLP_8	B1-G1
DIP-⍺-GAL4; UAS>stop>GFP.Myr/+; fruFLP/+	Female	VNC	F									6d_female_vnc_DIP⍺_55810_fruFLP_16	B1-M7
DIP-⍺-GAL4; UAS>stop>GFP.Myr/+; fruFLP/+	Female	VNC	F									7d_female_vnc_DIP⍺_55810_fruFLP_17	B1-O3
DIP-⍺-GAL4; UAS>stop>GFP.Myr/+; fruFLP/+	Female	VNC	F									6d_female_vnc_DIP⍺_55810_fruFLP_15	B1-R1
DIP-⍺-GAL4; UAS>stop>GFP.Myr/+; fruFLP/+	Female	VNC	F									6d_female_vnc_DIP⍺_55810_fruFLP_18	B1-R3
DIP-⍺-GAL4; UAS>stop>GFP.Myr/+; fruFLP/+	Female	VNC	F									6d_female_vnc_DIP⍺_55810_fruFLP_11	B1-Z9
DIP-⍺-GAL4; UAS>stop>GFP.Myr/+; fruFLP/+	Female	VNC	F									6d_female_vnc_DIP⍺_55810_fruFLP_12	B2-B9
DIP-⍺-GAL4; UAS>stop>GFP.Myr/+; fruFLP/+	Female	VNC	F									6d_female_vnc_DIP⍺_55810_fruFLP_1_20181106	B2-G8
DIP-⍺-GAL4; UAS>stop>GFP.Myr/+; fruFLP/+	Female	VNC	F									6d_female_vnc_DIP⍺_55810_fruFLP_7	B2-H3
DIP-⍺-GAL4; UAS>stop>GFP.Myr/+; fruFLP/+	Female	VNC	F									6d_female_vnc_DIP⍺_55810_fruFLP_2_20181106	B2-L6
DIP-⍺-GAL4; UAS>stop>GFP.Myr/+; fruFLP/+	Female	VNC	F									6d_female_vnc_DIP⍺_55810_fruFLP_3_20181106	B2-M5
DIP-⍺-GAL4; UAS>stop>GFP.Myr/+; fruFLP/+	Female	VNC	F									6d_female_vnc_DIP⍺_55810_fruFLP_6_20181106	B1-O9
DIP-⍺-GAL4; UAS>stop>GFP.Myr/+; fruFLP/+	Female	VNC	F									6d_female_vnc_DIP⍺_55810_fruFLP_5_20181106	B1-S2
DIP-⍺-GAL4; UAS>stop>GFP.Myr/+; fruFLP/+	Female	VNC	F									6d_female_vnc_DIP⍺_55810_fruFLP_4_20181106	B1-T4
DIP-⍺-GAL4; UAS>stop>GFP.Myr/+; fruFLP/+	Female	VNC	M									6d_female_vnc_DIP⍺_55810_fruFLP_14	B1-U5
DIP-⍺-GAL4; UAS>stop>GFP.Myr/+; fruFLP/+	Female	VNC	X									6d_female_vnc_DIP⍺_55810_fruFLP_10	B1-C7
DIP-⍺-GAL4; UAS>stop>GFP.Myr/+; fruFLP/+	Male	Brain		U, 1	0	A	N	M	M	0		4d_male_DIP⍺_55810_fruFLP_5_20180917	B1-D4
DIP-⍺-GAL4; UAS>stop>GFP.Myr/+; fruFLP/+	Male	Brain		U, 0	0	A	Y	M	M	0		7d_male_1_DIP⍺_55810_fruFLP_7_20180918	B1-D5
DIP-⍺-GAL4; UAS>stop>GFP.Myr/+; fruFLP/+	Male	Brain		U, 0	1	P, 0	Y	M	M	0		7d_male_5_DIP⍺_55810_fruFLP_7_20180918	B1-F3
DIP-⍺-GAL4; UAS>stop>GFP.Myr/+; fruFLP/+	Male	Brain		U, 0	0	A	N	M	M	0		7d_male_3_DIP⍺_55810_fruFLP_7_20180918	B1-F7
DIP-⍺-GAL4; UAS>stop>GFP.Myr/+; fruFLP/+	Male	Brain		U, 0	0	A	N	M	M	0		6d_male_12_DIP⍺_55810_fruFLP_	B1-G9
DIP-⍺-GAL4; UAS>stop>GFP.Myr/+; fruFLP/+	Male	Brain		U, 0	0	P, 2	N	M	M	0		4d_male_DIP⍺_55810_fruFLP_3_20180917	B1-H6
DIP-⍺-GAL4; UAS>stop>GFP.Myr/+; fruFLP/+	Male	Brain		U, 0	0	A	N	M	M	0		4d_male_DIP⍺_55810_fruFLP_2_20180917	B1-L8
DIP-⍺-GAL4; UAS>stop>GFP.Myr/+; fruFLP/+	Male	Brain		U, 1	0	A	Y	M	M	0		6d_male_7_DIP⍺_55810_fruFLP_	B1-O8
DIP-⍺-GAL4; UAS>stop>GFP.Myr/+; fruFLP/+	Male	Brain		U, 0	1	P, 1	N	M	M	0		7d_male_4_DIP⍺_55810_fruFLP_7_20180918	B1-V8
DIP-⍺-GAL4; UAS>stop>GFP.Myr/+; fruFLP/+	Male	Brain		U, 0	0	P, 1	N	M	M	0		4d_male_DIP⍺_55810_fruFLP_1_20180917	B1-W4
DIP-⍺-GAL4; UAS>stop>GFP.Myr/+; fruFLP/+	Male	Brain		U, 0	1	P, 1	N	M	M	0		6d_male_10_DIP⍺_55810_fruFLP_	B2-B8
DIP-⍺-GAL4; UAS>stop>GFP.Myr/+; fruFLP/+	Male	Brain		U, 0	1	P, 0	N	M	M	0		6d_male_11_DIP⍺_55810_fruFLP_	B2-C2
DIP-⍺-GAL4; UAS>stop>GFP.Myr/+; fruFLP/+	Male	Brain		U, 0	0	P, 1	N	M	M	0		7d_male_2_DIP⍺_55810_fruFLP_7_20180918	B2-G7
DIP-⍺-GAL4; UAS>stop>GFP.Myr/+; fruFLP/+	Male	Brain		U, 0	0	A	N	M	M	1		6d_male_6_DIP⍺_55810_fruFLP_	B2-H7
DIP-⍺-GAL4; UAS>stop>GFP.Myr/+; fruFLP/+	Male	Brain		X	0	A	Y	M	M	0		4d_male_DIP⍺_55810_fruFLP_6_20180917	B2-J6
DIP-⍺-GAL4; UAS>stop>GFP.Myr/+; fruFLP/+	Male	Brain		U, 1	0	A	Y	M	M	1		6d_male_9_DIP⍺_55810_fruFLP_	B2-K1
DIP-⍺-GAL4; UAS>stop>GFP.Myr/+; fruFLP/+	Male	Brain		U, 0	0	A	N	M	M	0		6d_male_8_DIP⍺_55810_fruFLP_	B2-P1
DIP-⍺-GAL4; UAS>stop>GFP.Myr/+; fruFLP/+	Male	Brain		U, 0	0	A	Y	F	F	0		4d_male_DIP⍺_55810_fruFLP_4_20180917	B1-S6
DIP-⍺-GAL4; UAS>stop>GFP.Myr/+; fruFLP/+	Female	Brain		U, 0	0	P, 2	N	F	F	0		7d_female_5_DIP⍺_55810_fruFLP_7_20180918	B1-B4
DIP-⍺-GAL4; UAS>stop>GFP.Myr/+; fruFLP/+	Female	Brain		U, 2	0	P, 1	N	F	F	0		7d_female_2_DIP⍺_55810_fruFLP_7_20180918	B1-C5
DIP-⍺-GAL4; UAS>stop>GFP.Myr/+; fruFLP/+	Female	Brain		U, 0	0	P, 2	N	F	F	0		6d_female_6_DIP⍺_55810_fruFLP	B1-E7
DIP-⍺-GAL4; UAS>stop>GFP.Myr/+; fruFLP/+	Female	Brain		U, 1	0	P, 2	N	F	F	0		4d_female_DIP⍺_55810_fruFLP_5_20180918	B1-F6
DIP-⍺-GAL4; UAS>stop>GFP.Myr/+; fruFLP/+	Female	Brain		U, 0	0	A	N	F	F	0		6d_female_10_DIP⍺_55810_fruFLP	B1-J1
DIP-⍺-GAL4; UAS>stop>GFP.Myr/+; fruFLP/+	Female	Brain		U, 1	0	P, 3	N	F	F	0		4d_female_DIP⍺_55810_fruFLP_2_20180917	B1-K7
DIP-⍺-GAL4; UAS>stop>GFP.Myr/+; fruFLP/+	Female	Brain		U, 0	0	P, 3	N	F	F	0		7d_female_1_DIP⍺_55810_fruFLP_7_20180918	B1-P8
DIP-⍺-GAL4; UAS>stop>GFP.Myr/+; fruFLP/+	Female	Brain		U, 1	0	P, 3	N	F	F	0		6d_female_7_DIP⍺_55810_fruFLP	B1-R8
DIP-⍺-GAL4; UAS>stop>GFP.Myr/+; fruFLP/+	Female	Brain		U, 1	1	P, 1	N	F	F	1		6d_female_8_DIP⍺_55810_fruFLP	B1-Y3
DIP-⍺-GAL4; UAS>stop>GFP.Myr/+; fruFLP/+	Female	Brain		U, 0	0	P, 1	N	F	F	0		7d_female_4_DIP⍺_55810_fruFLP_7_20180918	B2-C6
DIP-⍺-GAL4; UAS>stop>GFP.Myr/+; fruFLP/+	Female	Brain		U, 1	0	A	N	F	F	0		4d_female_DIP⍺_55810_fruFLP_6_20180918	B2-K5
DIP-⍺-GAL4; UAS>stop>GFP.Myr/+; fruFLP/+	Female	Brain		U, 1	0	P, 2	N	F	F	0		4d_female_DIP⍺_55810_fruFLP_3_20180918	B2-O8
DIP-⍺-GAL4; UAS>stop>GFP.Myr/+; fruFLP/+	Female	Brain		U, 0	0	P, 3	N	F	F	0		6d_female_9_DIP⍺_55810_fruFLP	B2-R9
DIP-⍺-GAL4; UAS>stop>GFP.Myr/+; fruFLP/+	Female	Brain		U, 1	0	P, 2	N	F	F	0		4d_female_DIP⍺_55810_fruFLP_4_20180918	B1-Q7
DIP-⍺-GAL4; UAS>stop>GFP.Myr/+; fruFLP/+	Female	Brain		U, 2	0	A	N	F	F	0		7d_female_3_DIP⍺_55810_fruFLP_7_20180918	B1-R5
DIP-⍺-GAL4; UAS>stop>GFP.Myr/+; fruFLP/+	Female	Brain		U, 2	1	P, 3	N	F	F	0		4d_female_DIP⍺_55810_fruFLP_1_20180917	B1-C9
Ex 1			Projection pattern in AbG of VNC	U shaped projection pattern & number of neuron body in SEG	Lateral assending projection in VLP	Square shaped projection pattern in VLP	M shaped projection pattern above AL in the Medial Part of Midbrain	Horizontal projection in the Medial Part of Midbrain	Protocerebral projection in SMP	mAL neuron
Genotype	Sex	Sample	Male-Like Pattern (M) vs No signal (X) vs Female-Like Pattern (F)	Presence of U shaped pattern (U), Absense of signal (X); Number (#) of neuron body	Number (#) of lateral assending projection	Absense (A) vs Presence (P) of Square shaped pattern, Number (#) of the corresponding neuron body	Presence of M shaped projection pattern (YES/NO)	Male-Like Pattern (M) vs No signal (X) vs Female-Like Pattern (F)	Male-Like Pattern (M) vs Female-Like Pattern (F)	Number (#) of mAL neuron		File Name	Blind Number
DIP-⍺-GAL4; UAS>stop>GFP.Myr/+; fruFLP/fru△C	Male	VNC	M									7d_male_14_vnc_DIP⍺_55810_fruFLP_FrudeltaC	B1-H5
DIP-⍺-GAL4; UAS>stop>GFP.Myr/+; fruFLP/fru△C	Male	VNC	M									7d_male_10_vnc_DIP⍺_55810_fruFLP_FrudeltaC	B1-Q1
DIP-⍺-GAL4; UAS>stop>GFP.Myr/+; fruFLP/fru△C	Male	VNC	M									7d_male_7_vnc_DIP⍺_55810_fruFLP_FrudeltaC	B1-Q8
DIP-⍺-GAL4; UAS>stop>GFP.Myr/+; fruFLP/fru△C	Male	VNC	M									7d_male_12_vnc_DIP⍺_55810_fruFLP_FrudeltaC	B1-T8
DIP-⍺-GAL4; UAS>stop>GFP.Myr/+; fruFLP/fru△C	Male	VNC	M									7d_male_3_vnc_DIP⍺_55810_fruFLP_FrudeltaC	B1-V7
DIP-⍺-GAL4; UAS>stop>GFP.Myr/+; fruFLP/fru△C	Male	VNC	M									7d_male_11_vnc_DIP⍺_55810_fruFLP_FrudeltaC	B2-J5
DIP-⍺-GAL4; UAS>stop>GFP.Myr/+; fruFLP/fru△C	Male	VNC	M									7d_male_6_vnc_DIP⍺_55810_fruFLP_FrudeltaC	B2-J8
DIP-⍺-GAL4; UAS>stop>GFP.Myr/+; fruFLP/fru△C	Male	VNC	M									7d_male_13_vnc_DIP⍺_55810_fruFLP_FrudeltaC	B2-L8
DIP-⍺-GAL4; UAS>stop>GFP.Myr/+; fruFLP/fru△C	Male	VNC	M									7d_male_4_vnc_DIP⍺_55810_fruFLP_FrudeltaC	B2-N2
DIP-⍺-GAL4; UAS>stop>GFP.Myr/+; fruFLP/fru△C	Male	VNC	M									7d_male_1_vnc_DIP⍺_55810_fruFLP_FrudeltaC	B2-N6
DIP-⍺-GAL4; UAS>stop>GFP.Myr/+; fruFLP/fru△C	Male	VNC	M									7d_male_2_vnc_DIP⍺_55810_fruFLP_FrudeltaC	B2-S6
DIP-⍺-GAL4; UAS>stop>GFP.Myr/+; fruFLP/fru△C	Male	VNC	M									7d_male_5_vnc_DIP⍺_55810_fruFLP_FrudeltaC	B2-T4
DIP-⍺-GAL4; UAS>stop>GFP.Myr/+; fruFLP/fru△C	Male	VNC	M									7d_male_9_vnc_DIP⍺_55810_fruFLP_FrudeltaC	B1-B1
DIP-⍺-GAL4; UAS>stop>GFP.Myr/+; fruFLP/fru△C	Male	VNC	M									7d_male_8_vnc_DIP⍺_55810_fruFLP_FrudeltaC	B1-M8
DIP-⍺-GAL4; UAS>stop>GFP.Myr/+; fruFLP/fru△C	Male	VNC	M									7d_male_15_vnc_DIP⍺_55810_fruFLP_FrudeltaC	B1-N2
DIP-⍺-GAL4; UAS>stop>GFP.Myr/+; fruFLP/fru△C	Female	VNC	F									7d_female_14_vnc_DIP⍺_55810_fruFLP_FrudeltaC	B1-B7
DIP-⍺-GAL4; UAS>stop>GFP.Myr/+; fruFLP/fru△C	Female	VNC	F									7d_female_18_vnc_DIP⍺_55810_fruFLP_FrudeltaC	B1-U4
DIP-⍺-GAL4; UAS>stop>GFP.Myr/+; fruFLP/fru△C	Female	VNC	F									7d_female_8_vnc_DIP⍺_55810_fruFLP_FrudeltaC	B1-V1
DIP-⍺-GAL4; UAS>stop>GFP.Myr/+; fruFLP/fru△C	Female	VNC	F									7d_female_2_vnc_DIP⍺_55810_fruFLP_FrudeltaC	B1-V5
DIP-⍺-GAL4; UAS>stop>GFP.Myr/+; fruFLP/fru△C	Female	VNC	F									7d_female_3_vnc__DIP⍺_55810_fruFLP_FrudeltaC	B1-Y4
DIP-⍺-GAL4; UAS>stop>GFP.Myr/+; fruFLP/fru△C	Female	VNC	F									7d_female_10_vnc_DIP⍺_55810_fruFLP_FrudeltaC	B2-C9
DIP-⍺-GAL4; UAS>stop>GFP.Myr/+; fruFLP/fru△C	Female	VNC	F									7d_female_11_vnc_DIP⍺_55810_fruFLP_FrudeltaC	B2-D7
DIP-⍺-GAL4; UAS>stop>GFP.Myr/+; fruFLP/fru△C	Female	VNC	F									7d_female_4_vnc_DIP⍺_55810_fruFLP_FrudeltaC	B2-E1
DIP-⍺-GAL4; UAS>stop>GFP.Myr/+; fruFLP/fru△C	Female	VNC	F									7d_female_1_vnc_DIP⍺_55810_fruFLP_FrudeltaC	B2-J4
DIP-⍺-GAL4; UAS>stop>GFP.Myr/+; fruFLP/fru△C	Female	VNC	F									7d_female_13_vnc_DIP⍺_55810_fruFLP_FrudeltaC	B2-K9
DIP-⍺-GAL4; UAS>stop>GFP.Myr/+; fruFLP/fru△C	Female	VNC	F									7d_female_7_vnc_DIP⍺_55810_fruFLP_FrudeltaC	B2-O7
DIP-⍺-GAL4; UAS>stop>GFP.Myr/+; fruFLP/fru△C	Female	VNC	F									7d_female_16_vnc_DIP⍺_55810_fruFLP_FrudeltaC	B2-P5
DIP-⍺-GAL4; UAS>stop>GFP.Myr/+; fruFLP/fru△C	Female	VNC	F									7d_female_15_vnc_DIP⍺_55810_fruFLP_FrudeltaC	B2-R8
DIP-⍺-GAL4; UAS>stop>GFP.Myr/+; fruFLP/fru△C	Female	VNC	F									7d_female_9_vnc_DIP⍺_55810_fruFLP_FrudeltaC	B2-U1
DIP-⍺-GAL4; UAS>stop>GFP.Myr/+; fruFLP/fru△C	Female	VNC	F									7d_female_17_vnc_DIP⍺_55810_fruFLP_FrudeltaC	B1-M6
DIP-⍺-GAL4; UAS>stop>GFP.Myr/+; fruFLP/fru△C	Female	VNC	F									7d_female_5_vnc_DIP⍺_55810_fruFLP_FrudeltaC	B1-N6
DIP-⍺-GAL4; UAS>stop>GFP.Myr/+; fruFLP/fru△C	Female	VNC	X									7d_female_6_vnc_DIP⍺_55810_fruFLP_FrudeltaC	B1-C2
DIP-⍺-GAL4; UAS>stop>GFP.Myr/+; fruFLP/fru△C	Female	VNC	X									7d_female_12_vnc_DIP⍺_55810_fruFLP_FrudeltaC	B1-A5
DIP-⍺-GAL4; UAS>stop>GFP.Myr/+; fruFLP/fru△C	Male	Brain		U, 1	1	A	N	M	F	0		6d_male_10_DIP⍺_55810_fruFLP_FrudeltaC	B1-B2
DIP-⍺-GAL4; UAS>stop>GFP.Myr/+; fruFLP/fru△C	Male	Brain		U, 0	1	A	N	M	F	0		6d_male_17_DIP⍺_55810_fruFLP_FrudeltaC	B1-E3
DIP-⍺-GAL4; UAS>stop>GFP.Myr/+; fruFLP/fru△C	Male	Brain		U, 0	0	A	N	M	M	0		6d_male_7_DIP⍺_55810_fruFLP_FrudeltaC	B1-F4
DIP-⍺-GAL4; UAS>stop>GFP.Myr/+; fruFLP/fru△C	Male	Brain		U, 1	1	A	N	M	F	0		6d_male_9_DIP⍺_55810_fruFLP_FrudeltaC	B1-H7
DIP-⍺-GAL4; UAS>stop>GFP.Myr/+; fruFLP/fru△C	Male	Brain		U, 1	0	P, 1	Y	M	F	0		6d_male_6_DIP⍺_55810_fruFLP_FrudeltaC	B1-L2
DIP-⍺-GAL4; UAS>stop>GFP.Myr/+; fruFLP/fru△C	Male	Brain		U, 0	0	P, 1	N	F	F	0		6d_male_16_DIP⍺_55810_fruFLP_FrudeltaC	B1-S3
DIP-⍺-GAL4; UAS>stop>GFP.Myr/+; fruFLP/fru△C	Male	Brain		U, 0	0	A	N	M	M	0		6d_male_4_DIP⍺_55810_fruFLP_FrudeltaC_05092019	B2-C5
DIP-⍺-GAL4; UAS>stop>GFP.Myr/+; fruFLP/fru△C	Male	Brain		U, 1	0	P, 1	N	M	F	0		6d_male_2_DIP⍺_55810_fruFLP_FrudeltaC_05092019	B2-F6
DIP-⍺-GAL4; UAS>stop>GFP.Myr/+; fruFLP/fru△C	Male	Brain		U, 1	1	P, 0	Y	M	F	0		6d_male_13_DIP⍺_55810_fruFLP_FrudeltaC	B2-J7
DIP-⍺-GAL4; UAS>stop>GFP.Myr/+; fruFLP/fru△C	Male	Brain		U, 0	1	A	N	M	M	0		6d_male_12_DIP⍺_55810_fruFLP_FrudeltaC	B2-R4
DIP-⍺-GAL4; UAS>stop>GFP.Myr/+; fruFLP/fru△C	Male	Brain		U, 0	1	A	N	M	M	0		6d_male_20_DIP⍺_55810_fruFLP_FrudeltaC	B2-S2
DIP-⍺-GAL4; UAS>stop>GFP.Myr/+; fruFLP/fru△C	Male	Brain		U, 0	0	A	Y	M	F	0		6d_male_15_DIP⍺_55810_fruFLP_FrudeltaC	B2-T8
DIP-⍺-GAL4; UAS>stop>GFP.Myr/+; fruFLP/fru△C	Male	Brain		U, 0	0	P, 1	N	M	M	0		6d_male_11_DIP⍺_55810_fruFLP_FrudeltaC	B1-G5
DIP-⍺-GAL4; UAS>stop>GFP.Myr/+; fruFLP/fru△C	Male	Brain		U, 0	0	A	N	M	M	0		6d_male_3_DIP⍺_55810_fruFLP_FrudeltaC_05092019	B1-N7
DIP-⍺-GAL4; UAS>stop>GFP.Myr/+; fruFLP/fru△C	Male	Brain		U, 0	0	A	Y	M	M	0		6d_male_14_DIP⍺_55810_fruFLP_FrudeltaC	B1-P5
DIP-⍺-GAL4; UAS>stop>GFP.Myr/+; fruFLP/fru△C	Male	Brain		U, 0	1	A	N	M	M	0		6d_male_1_DIP⍺_55810_fruFLP_FrudeltaC_05092019	B1-T2
DIP-⍺-GAL4; UAS>stop>GFP.Myr/+; fruFLP/fru△C	Male	Brain		U, 1	1	A	Y	M	F	0		6d_male_8_DIP⍺_55810_fruFLP_FrudeltaC	B1-T6
DIP-⍺-GAL4; UAS>stop>GFP.Myr/+; fruFLP/fru△C	Male	Brain		U, 0	1	P, 0	Y	M	F	1		6d_male_18_DIP⍺_55810_fruFLP_FrudeltaC	B1-T9
DIP-⍺-GAL4; UAS>stop>GFP.Myr/+; fruFLP/fru△C	Male	Brain		U, 0	1	P, 0	N	F	F	0		6d_male_19_DIP⍺_55810_fruFLP_FrudeltaC	B1-U1
DIP-⍺-GAL4; UAS>stop>GFP.Myr/+; fruFLP/fru△C	Male	Brain		U, 1	1	A	N	M	M	0		6d_male_5_DIP⍺_55810_fruFLP_FrudeltaC_05092019	B1-Z6
DIP-⍺-GAL4; UAS>stop>GFP.Myr/+; fruFLP/fru△C	Female	Brain		U, 0	0	P, 3	N	F	F	0		7d_female_19_DIP⍺_55810_fruFLP_FrudeltaC	B1-A1
DIP-⍺-GAL4; UAS>stop>GFP.Myr/+; fruFLP/fru△C	Female	Brain		U, 1	1	P, 1	N	F	F	0		6d_female_4_DIP⍺_55810_fruFLP_FrudeltaC_05092019	B1-B8
DIP-⍺-GAL4; UAS>stop>GFP.Myr/+; fruFLP/fru△C	Female	Brain		U, 0	0	P, 2	N	F	F	0		6d_female_6_DIP⍺_55810_fruFLP_FrudeltaC_05092019	B1-E2
DIP-⍺-GAL4; UAS>stop>GFP.Myr/+; fruFLP/fru△C	Female	Brain		N.A	N.A	N.A	N.A	N.A	N.A	N.A		7d_female_17_DIP⍺_55810_fruFLP_FrudeltaC	B1-G2
DIP-⍺-GAL4; UAS>stop>GFP.Myr/+; fruFLP/fru△C	Female	Brain		U, 2	0	P, 7	N	F	F	0		7d_female_16_DIP⍺_55810_fruFLP_FrudeltaC	B1-K1
DIP-⍺-GAL4; UAS>stop>GFP.Myr/+; fruFLP/fru△C	Female	Brain		U, 1	0	P, 1	N	F	M	0		6d_female_2_backside_DIP⍺_55810_fruFLP_FrudeltaC_05092019	B1-R4
DIP-⍺-GAL4; UAS>stop>GFP.Myr/+; fruFLP/fru△C	Female	Brain		U, 0	0	P, 3	N	F	F	0		6d_female_5_DIP⍺_55810_fruFLP_FrudeltaC_05092019	B1-X1
DIP-⍺-GAL4; UAS>stop>GFP.Myr/+; fruFLP/fru△C	Female	Brain		U, 1	0	P, 4	N	F	F	0		7d_female_12_DIP⍺_55810_fruFLP_FrudeltaC	B1-Z4
DIP-⍺-GAL4; UAS>stop>GFP.Myr/+; fruFLP/fru△C	Female	Brain		U, 0	0	P, 1	N	F	F	1		6d_female_1_DIP⍺_55810_fruFLP_FrudeltaC_05092019	B2-A8
DIP-⍺-GAL4; UAS>stop>GFP.Myr/+; fruFLP/fru△C	Female	Brain		U, 1	0	P, 2	N	F	F	0		7d_female_10_DIP⍺_55810_fruFLP_FrudeltaC	B2-G2
DIP-⍺-GAL4; UAS>stop>GFP.Myr/+; fruFLP/fru△C	Female	Brain		U, 1	1	P, 1	N	F	F	0		7d_female_13_DIP⍺_55810_fruFLP_FrudeltaC	B2-M1
DIP-⍺-GAL4; UAS>stop>GFP.Myr/+; fruFLP/fru△C	Female	Brain		U, 0	1	P, 2	N	F	F	0		7d_female_18_DIP⍺_55810_fruFLP_FrudeltaC	B2-M9
DIP-⍺-GAL4; UAS>stop>GFP.Myr/+; fruFLP/fru△C	Female	Brain		U, 1	0	P, 2	N	F	F	0		7d_female_11_DIP⍺_55810_fruFLP_FrudeltaC	B2-O4
DIP-⍺-GAL4; UAS>stop>GFP.Myr/+; fruFLP/fru△C	Female	Brain		U, 1	0	P, 4	N	F	F	0		7d_female_15_DIP⍺_55810_fruFLP_FrudeltaC	B2-P9
DIP-⍺-GAL4; UAS>stop>GFP.Myr/+; fruFLP/fru△C	Female	Brain		U, 0	0	P, 2	N	F	M	0		7d_female_14_DIP⍺_55810_fruFLP_FrudeltaC	B2-Q4
DIP-⍺-GAL4; UAS>stop>GFP.Myr/+; fruFLP/fru△C	Female	Brain		U, 2	0	P, 4	Y	F	F	0		6d_female_9_DIP⍺_55810_fruFLP_FrudeltaC_05092019	B2-R5
DIP-⍺-GAL4; UAS>stop>GFP.Myr/+; fruFLP/fru△C	Female	Brain		U, 0	1	P, 2	N	F	F	0		6d_female_8_DIP⍺_55810_fruFLP_FrudeltaC_05092019	B2-S4
DIP-⍺-GAL4; UAS>stop>GFP.Myr/+; fruFLP/fru△C	Female	Brain		U, 0	0	P, 1	N	F	F	0		6d_female_3_DIP⍺_55810_fruFLP_FrudeltaC_05092019	B1-B3
DIP-⍺-GAL4; UAS>stop>GFP.Myr/+; fruFLP/fru△C	Female	Brain		U, 1	0	P, 6	N	F	F	0		6d_female_7_DIP⍺_55810_fruFLP_FrudeltaC_05092019	B1-R7
Ex2			Projection pattern in AbG of VNC	U shaped projection pattern & number of neuron body in SEG	Lateral assending projection in VLP	Square shaped projection pattern in VLP	M shaped projection pattern above AL in the Medial Part of Midbrain	Horizontal projection in the Medial Part of Midbrain	Protocerebral projection in SMP	mAL neuron
Genotype	Sex	Sample	Male-Like Pattern (M) vs No signal (X) vs Female-Like Pattern (F)	Presence of U shaped pattern (U), Absense of signal (X); Number (#) of neuron body	Number (#) of lateral assending projection	Absense (A) vs Presence (P) of Square shaped pattern, Number (#) of the corresponding neuron body	Presence of M shaped projection pattern (YES/NO)	Male-Like Pattern (M) vs No signal (X) vs Female-Like Pattern (F)	Male-Like Pattern (M) vs Female-Like Pattern (F)	Number (#) of mAL neuron		File Name	Blind Number
DIP-⍺-GAL4; UAS>stop>GFP.Myr/UAS-TraF; fruFLP/+	Male	VNC	F									5d_male_vnc_2_DIP⍺_55810_TraF_fruFLP_gfp488_FruM568_nc82633_01112018	B1-W5
DIP-⍺-GAL4; UAS>stop>GFP.Myr/UAS-TraF; fruFLP/+	Male	VNC	F									7d_male_vnc_10_DIP⍺_55810_TraF_fruFLP	B1-Y8
DIP-⍺-GAL4; UAS>stop>GFP.Myr/UAS-TraF; fruFLP/+	Male	VNC	F									7d_male_vnc_15_DIP⍺_55810_TraF_fruFLP	B1-Z5
DIP-⍺-GAL4; UAS>stop>GFP.Myr/UAS-TraF; fruFLP/+	Male	VNC	F									5d_male_vnc_1_DIP⍺_55810_TraF_fruFLP_gfp488_FruM568_nc82633_01112018	B1-X8
DIP-⍺-GAL4; UAS>stop>GFP.Myr/UAS-TraF; fruFLP/+	Male	VNC	F									7d_male_vnc_7_DIP⍺_55810_TraF_fruFLP	B1-U2
DIP-⍺-GAL4; UAS>stop>GFP.Myr/UAS-TraF; fruFLP/+	Male	VNC	M									7d_male_vnc_12_DIP⍺_55810_TraF_fruFLP	B1-D1
DIP-⍺-GAL4; UAS>stop>GFP.Myr/UAS-TraF; fruFLP/+	Male	VNC	M									7d_male_vnc_14_DIP⍺_55810_TraF_fruFLP	B1-K5
DIP-⍺-GAL4; UAS>stop>GFP.Myr/UAS-TraF; fruFLP/+	Male	VNC	M									7d_male_vnc_8_DIP⍺_55810_TraF_fruFLP	B1-O7
DIP-⍺-GAL4; UAS>stop>GFP.Myr/UAS-TraF; fruFLP/+	Male	VNC	M									7d_male_vnc_16_DIP⍺_55810_TraF_fruFLP	B1-Q2
DIP-⍺-GAL4; UAS>stop>GFP.Myr/UAS-TraF; fruFLP/+	Male	VNC	M									7d_male_vnc_13_DIP⍺_55810_TraF_fruFLP	B2-D4
DIP-⍺-GAL4; UAS>stop>GFP.Myr/UAS-TraF; fruFLP/+	Male	VNC	M									7d_male_vnc_9_DIP⍺_55810_TraF_fruFLP	B2-K6
DIP-⍺-GAL4; UAS>stop>GFP.Myr/UAS-TraF; fruFLP/+	Male	VNC	M									7d_male_vnc_4_DIP⍺_55810_TraF_fruFLP	B2-U5
DIP-⍺-GAL4; UAS>stop>GFP.Myr/UAS-TraF; fruFLP/+	Male	VNC	M									7d_male_vnc_5_DIP⍺_55810_TraF_fruFLP	B1-S9
DIP-⍺-GAL4; UAS>stop>GFP.Myr/UAS-TraF; fruFLP/+	Male	VNC	X									7d_male_vnc_11_DIP⍺_55810_TraF_fruFLP	B2-D8
DIP-⍺-GAL4; UAS>stop>GFP.Myr/UAS-TraF; fruFLP/+	Male	VNC	X									7d_male_vnc_6_DIP⍺_55810_TraF_fruFLP	B2-M7
DIP-⍺-GAL4; UAS>stop>GFP.Myr/UAS-TraF; fruFLP/+	Male	VNC	X									7d_male_vnc_3_DIP⍺_55810_TraF_fruFLP	B2-O5
DIP-⍺-GAL4; UAS>stop>GFP.Myr/UAS-TraF; fruFLP/+	Female	VNC	F									7d_female_13_VNC_DIP⍺_55810_TraF_fruFLP	B1-A9
DIP-⍺-GAL4; UAS>stop>GFP.Myr/UAS-TraF; fruFLP/+	Female	VNC	F									7d_female_6_VNC_DIP⍺_55810_TraF_fruFLP	B1-B9
DIP-⍺-GAL4; UAS>stop>GFP.Myr/UAS-TraF; fruFLP/+	Female	VNC	F									7d_female_10_VNC_DIP⍺_55810_TraF_fruFLP	B1-F2
DIP-⍺-GAL4; UAS>stop>GFP.Myr/UAS-TraF; fruFLP/+	Female	VNC	F									7d_female_15_VNC_DIP⍺_55810_TraF_fruFLP	B1-J2
DIP-⍺-GAL4; UAS>stop>GFP.Myr/UAS-TraF; fruFLP/+	Female	VNC	F									7d_female_8_VNC_DIP⍺_55810_TraF_fruFLP	B1-J4
DIP-⍺-GAL4; UAS>stop>GFP.Myr/UAS-TraF; fruFLP/+	Female	VNC	F									7d_female_9_VNC_DIP⍺_55810_TraF_fruFLP	B1-M2
DIP-⍺-GAL4; UAS>stop>GFP.Myr/UAS-TraF; fruFLP/+	Female	VNC	F									7d_female_4_VNC_DIP⍺_55810_TraF_fruFLP	B1-N3
DIP-⍺-GAL4; UAS>stop>GFP.Myr/UAS-TraF; fruFLP/+	Female	VNC	F									7d_female_2_VNC_DIP⍺_55810_TraF_fruFLP	B1-N9
DIP-⍺-GAL4; UAS>stop>GFP.Myr/UAS-TraF; fruFLP/+	Female	VNC	F									7d_female_16_VNC_DIP⍺_55810_TraF_fruFLP	B2-D5
DIP-⍺-GAL4; UAS>stop>GFP.Myr/UAS-TraF; fruFLP/+	Female	VNC	F									7d_female_1_VNC_DIP⍺_55810_TraF_fruFLP	B2-E5
DIP-⍺-GAL4; UAS>stop>GFP.Myr/UAS-TraF; fruFLP/+	Female	VNC	F									7d_female_11_VNC_DIP⍺_55810_TraF_fruFLP	B2-E8
DIP-⍺-GAL4; UAS>stop>GFP.Myr/UAS-TraF; fruFLP/+	Female	VNC	F									7d_female_5_VNC_DIP⍺_55810_TraF_fruFLP	B2-L7
DIP-⍺-GAL4; UAS>stop>GFP.Myr/UAS-TraF; fruFLP/+	Female	VNC	F									7d_female_17_VNC_DIP⍺_55810_TraF_fruFLP	B2-M8
DIP-⍺-GAL4; UAS>stop>GFP.Myr/UAS-TraF; fruFLP/+	Female	VNC	F									7d_female_7_VNC_DIP⍺_55810_TraF_fruFLP	B2-R7
DIP-⍺-GAL4; UAS>stop>GFP.Myr/UAS-TraF; fruFLP/+	Female	VNC	F									7d_female_12_VNC_DIP⍺_55810_TraF_fruFLP	B1-K6
DIP-⍺-GAL4; UAS>stop>GFP.Myr/UAS-TraF; fruFLP/+	Female	VNC	N.A.									7d_female_14_VNC_DIP⍺_55810_TraF_fruFLP	B1-U6
DIP-⍺-GAL4; UAS>stop>GFP.Myr/UAS-TraF; fruFLP/+	Female	VNC	X									7d_female_3_VNC_DIP⍺_55810_TraF_fruFLP	B1-X6
DIP-⍺-GAL4; UAS>stop>GFP.Myr/UAS-TraF; fruFLP/+	Male	Brain		U, 0	0	P, 0	Y	M	F	0		4d_male_8_DIP⍺_55810_TraF_fruFLP_gfp488_FruM546_nc82633_01302018	B1-E8
DIP-⍺-GAL4; UAS>stop>GFP.Myr/UAS-TraF; fruFLP/+	Male	Brain		X, No U, 0	0	A	N	F	F	0		4d_male_6_DIP⍺_55810_TraF_fruFLP_gfp488_FruM546_nc82633_01302018	B1-G4
DIP-⍺-GAL4; UAS>stop>GFP.Myr/UAS-TraF; fruFLP/+	Male	Brain		U, 0	1	N.A.	N.A.	M	N.A.	N.A.		5d_male_1_DIP⍺_55810_TraF_fruFLP_gfp488_FruM568_nc82633_01112018	B1-T1
DIP-⍺-GAL4; UAS>stop>GFP.Myr/UAS-TraF; fruFLP/+	Male	Brain		U, 1	1	P, 1	N	X	F	0		4d_male_1_DIP⍺_55810_TraF_fruFLP_gfp488_nc82633_01062018	B1-W1
DIP-⍺-GAL4; UAS>stop>GFP.Myr/UAS-TraF; fruFLP/+	Male	Brain		U, 0	1	P, 4	N	F	F	0		5d_male_5_DIP⍺_55810_TraF_fruFLP_gfp488_FruM568_nc82633_01112018	B1-X3
DIP-⍺-GAL4; UAS>stop>GFP.Myr/UAS-TraF; fruFLP/+	Male	Brain		U, 1	0	P, 2	Y	M	F	0		4d_male_7_DIP⍺_55810_TraF_fruFLP_gfp488_FruM546_nc82633_01302018	B1-L9
DIP-⍺-GAL4; UAS>stop>GFP.Myr/UAS-TraF; fruFLP/+	Male	Brain		U, 1	1	P, 1	N	N.A.	F	0		4d_male_9_DIP⍺_55810_TraF_fruFLP_gfp488_FruM546_nc82633_01302018	B2-B5
DIP-⍺-GAL4; UAS>stop>GFP.Myr/UAS-TraF; fruFLP/+	Male	Brain		U, 0	1	P, 2	N	X	F	0		5d_male_2_DIP⍺_55810_TraF_fruFLP_gfp488_FruM568_nc82633_01112018	B2-B7
DIP-⍺-GAL4; UAS>stop>GFP.Myr/UAS-TraF; fruFLP/+	Male	Brain		U, 1	0	P, 2	Y	M	F	0		5d_male_4_DIP⍺_55810_TraF_fruFLP_gfp488_FruM568_nc82633_01112018	B2-E6
DIP-⍺-GAL4; UAS>stop>GFP.Myr/UAS-TraF; fruFLP/+	Male	Brain		U, 0	0	A	N	M	F	0		4d_male_5_DIP⍺_55810_TraF_fruFLP_gfp488_FruM546_nc82633_01302018	B2-F5
DIP-⍺-GAL4; UAS>stop>GFP.Myr/UAS-TraF; fruFLP/+	Male	Brain		U, 0	0	A	N	M	F	0		4d_male_10_DIP⍺_55810_TraF_fruFLP_gfp488_FruM546_nc82633_01302018	B2-L9
DIP-⍺-GAL4; UAS>stop>GFP.Myr/UAS-TraF; fruFLP/+	Male	Brain		U, 1	1	P, 2	N	F	F	0		5d_male_3_DIP⍺_55810_TraF_fruFLP_gfp488_FruM568_nc82633_01112018	B2-M6
DIP-⍺-GAL4; UAS>stop>GFP.Myr/UAS-TraF; fruFLP/+	Male	Brain		U, 0	1	P, 2	Y	M	F	0		4d_male_4_DIP⍺_55810_TraF_fruFLP_gfp488_FruM546_nc82633_01302018	B2-N7
DIP-⍺-GAL4; UAS>stop>GFP.Myr/UAS-TraF; fruFLP/+	Male	Brain		U, 0	0	A	N	X	F	0		4d_male_3_DIP⍺_55810_TraF_fruFLP_gfp488_FruM546_nc82633_01302018	B1-F8
DIP-⍺-GAL4; UAS>stop>GFP.Myr/UAS-TraF; fruFLP/+	Male	Brain		U, 1	1	P, 1	N	F	F	0		4d_male_2_DIP⍺_55810_TraF_fruFLP_gfp488_nc82633_01062018	B1-Q3
DIP-⍺-GAL4; UAS>stop>GFP.Myr/UAS-TraF; fruFLP/+	Female	Brain		U, 0	0	P, 2	N	F	F	0		5d_female_1_DIP⍺_55810_TraF_fruFLP_gfp488_nc82633_01112018	B1-A3
DIP-⍺-GAL4; UAS>stop>GFP.Myr/UAS-TraF; fruFLP/+	Female	Brain		U, 0	0	P, 1	N	F	F	0		4d_female_3_DIP⍺_55810_TraF_fruFLP_gfp488_nc82633_01062018	B1-H4
DIP-⍺-GAL4; UAS>stop>GFP.Myr/UAS-TraF; fruFLP/+	Female	Brain		U, 1	1	A	N	F	F	0		7d_female_16_DIP⍺_55810_TraF_fruFLP	B1-P1
DIP-⍺-GAL4; UAS>stop>GFP.Myr/UAS-TraF; fruFLP/+	Female	Brain		U, 1	0	P, 2	N	X	F	0		7d_female_12_DIP⍺_55810_TraF_fruFLP	B1-S7
DIP-⍺-GAL4; UAS>stop>GFP.Myr/UAS-TraF; fruFLP/+	Female	Brain		U, 0	1	P, 1	N	F	F	0		7d_female_11_DIP⍺_55810_TraF_fruFLP	B1-T3
DIP-⍺-GAL4; UAS>stop>GFP.Myr/UAS-TraF; fruFLP/+	Female	Brain		U, 1	0	A	N	X	F	0		7d_female_14_DIP⍺_55810_TraF_fruFLP	B1-U3
DIP-⍺-GAL4; UAS>stop>GFP.Myr/UAS-TraF; fruFLP/+	Female	Brain		U, 0	0	P, 1	N	F	F	0		7d_female_15_DIP⍺_55810_TraF_fruFLP	B2-H6
DIP-⍺-GAL4; UAS>stop>GFP.Myr/UAS-TraF; fruFLP/+	Female	Brain		U, 1	0	A	N	F	F	0		7d_female_13_DIP⍺_55810_TraF_fruFLP	B2-S7
DIP-⍺-GAL4; UAS>stop>GFP.Myr/UAS-TraF; fruFLP/+	Female	Brain		U, 1	0	A	N	X	F	0		4d_female_1_DIP⍺_55810_TraF_fruFLP_gfp488_nc82633_01062018	B1-E1
DIP-⍺-GAL4; UAS>stop>GFP.Myr/UAS-TraF; fruFLP/+	Female	Brain		X, No U, 1	0	P, 1	N	X	F	0		4d_female_4_DIP⍺_55810_TraF_fruFLP_gfp488_nc82633_01062018	B1-K9
DIP-⍺-GAL4; UAS>stop>GFP.Myr/UAS-TraF; fruFLP/+	Female	Brain		U, 1	1	P, 2	N	X	F	0		4d_female_2_DIP⍺_55810_TraF_fruFLP_gfp488_nc82633_01062018	B1-N1
DIP-⍺-GAL4; UAS>stop>GFP.Myr/UAS-TraF; fruFLP/+	Female	Brain		U, 1	1	A	N	F	F	0		4d_female_6_DIP⍺_55810_TraF_fruFLP_gfp488_nc82633_01062018	B1-N4
DIP-⍺-GAL4; UAS>stop>GFP.Myr/UAS-TraF; fruFLP/+	Female	Brain		U, 1	2	A	N	M	F	0		5d_female_4_DIP⍺_55810_TraF_fruFLP_gfp488_FruM568_nc82633_01112018	B1-Z3
DIP-⍺-GAL4; UAS>stop>GFP.Myr/UAS-TraF; fruFLP/+	Female	Brain		U, 1	1	A	N	M	M	0		5d_female_3_DIP⍺_55810_TraF_fruFLP_gfp488_FruM568_nc82633_01112018	B2-A5
DIP-⍺-GAL4; UAS>stop>GFP.Myr/UAS-TraF; fruFLP/+	Female	Brain		U, 1	2	A	N	F	F	0		5d_female_2_DIP⍺_55810_TraF_fruFLP_gfp488_nc82633_01112018	B2-K8
DIP-⍺-GAL4; UAS>stop>GFP.Myr/UAS-TraF; fruFLP/+	Female	Brain		U, 0	1	A	N	F	F	0		4d_female_5_DIP⍺_55810_TraF_fruFLP_gfp488_nc82633_01062018	B2-T3
Ex3			Projection pattern in AbG of VNC	U shaped projection pattern & number of neuron body in SEG	Lateral assending projection in VLP	Square shaped projection pattern in VLP	M shaped projection pattern above AL in the Medial Part of Midbrain	Horizontal projection in the Medial Part of Midbrain	Protocerebral projection in SMP	mAL neuron
Genotype	Sex	Sample	Male-Like Pattern (M) vs No signal (X) vs Female-Like Pattern (F)	Presence of U shaped pattern (U), Absense of signal (X); Number (#) of neuron body	Number (#) of lateral assending projection	Absense (A) vs Presence (P) of Square shaped pattern, Number (#) of the corresponding neuron body	Presence of M shaped projection pattern (YES/NO)	Male-Like Pattern (M) vs No signal (X) vs Female-Like Pattern (F)	Male-Like Pattern (M) vs Female-Like Pattern (F)	Number (#) of mAL neuron		File Name	Blind Number
DIP-⍺-GAL4; UAS>stop>GFP.MyrUAS-FruMA; fruFLP/+	Male	VNC	M									7d_male_7_VNC_DIP⍺_55810_FruMA_fruFLP	B2-S5
DIP-⍺-GAL4; UAS>stop>GFP.MyrUAS-FruMA; fruFLP/+	Male	VNC	M									7d_male_18_VNC_DIP⍺_55810_FruMA_fruFLP	B2-U2
DIP-⍺-GAL4; UAS>stop>GFP.MyrUAS-FruMA; fruFLP/+	Male	VNC	M									7d_male_11_VNC_DIP⍺_55810_FruMA_fruFLP	B1-C8
DIP-⍺-GAL4; UAS>stop>GFP.MyrUAS-FruMA; fruFLP/+	Male	VNC	M									7d_male_12_VNC_DIP⍺_55810_FruMA_fruFLP	B1-L3
DIP-⍺-GAL4; UAS>stop>GFP.MyrUAS-FruMA; fruFLP/+	Male	VNC	M									7d_male_6_VNC_DIP⍺_55810_FruMA_fruFLP	B1-L6
DIP-⍺-GAL4; UAS>stop>GFP.MyrUAS-FruMA; fruFLP/+	Male	VNC	M									7d_male_4_VNC_DIP⍺_55810_FruMA_fruFLP	B1-L7
DIP-⍺-GAL4; UAS>stop>GFP.MyrUAS-FruMA; fruFLP/+	Male	VNC	M									7d_male_8_VNC_DIP⍺_55810_FruMA_fruFLP	B1-P3
DIP-⍺-GAL4; UAS>stop>GFP.MyrUAS-FruMA; fruFLP/+	Male	VNC	M									7d_male_3_VNC_DIP⍺_55810_FruMA_fruFLP	B1-V6
DIP-⍺-GAL4; UAS>stop>GFP.MyrUAS-FruMA; fruFLP/+	Male	VNC	M									7d_male_14_VNC_DIP⍺_55810_FruMA_fruFLP	B1-Z1
DIP-⍺-GAL4; UAS>stop>GFP.MyrUAS-FruMA; fruFLP/+	Male	VNC	M									7d_male_10_VNC_DIP⍺_55810_FruMA_fruFLP	B2-H5
DIP-⍺-GAL4; UAS>stop>GFP.MyrUAS-FruMA; fruFLP/+	Male	VNC	M									7d_male_9_VNC_DIP⍺_55810_FruMA_fruFLP	B2-J2
DIP-⍺-GAL4; UAS>stop>GFP.MyrUAS-FruMA; fruFLP/+	Male	VNC	M									7d_male_16_VNC_DIP⍺_55810_FruMA_fruFLP	B2-L5
DIP-⍺-GAL4; UAS>stop>GFP.MyrUAS-FruMA; fruFLP/+	Male	VNC	M									7d_male_17_VNC_DIP⍺_55810_FruMA_fruFLP	B2-O3
DIP-⍺-GAL4; UAS>stop>GFP.MyrUAS-FruMA; fruFLP/+	Male	VNC	M									7d_male_15_VNC_DIP⍺_55810_FruMA_fruFLP	B2-O9
DIP-⍺-GAL4; UAS>stop>GFP.MyrUAS-FruMA; fruFLP/+	Male	VNC	M									7d_male_5_VNC_DIP⍺_55810_FruMA_fruFLP	B2-Q8
DIP-⍺-GAL4; UAS>stop>GFP.MyrUAS-FruMA; fruFLP/+	Male	VNC	M									7d_male_19_VNC_DIP⍺_55810_FruMA_fruFLP	B2-R2
DIP-⍺-GAL4; UAS>stop>GFP.MyrUAS-FruMA; fruFLP/+	Male	VNC	M									7d_male_1_VNC_DIP⍺_55810_FruMA_fruFLP	B1-U7
DIP-⍺-GAL4; UAS>stop>GFP.MyrUAS-FruMA; fruFLP/+	Male	VNC	X									7d_male_2_VNC_DIP⍺_55810_FruMA_fruFLP	B2-S1
DIP-⍺-GAL4; UAS>stop>GFP.MyrUAS-FruMA; fruFLP/+	Male	VNC	X									7d_male_13_VNC_DIP⍺_55810_FruMA_fruFLP	B2-Q5
DIP-⍺-GAL4; UAS>stop>GFP.MyrUAS-FruMA; fruFLP/+	Female	VNC	F									7d_female_12_VNC_DIP⍺_55810_FruMA_fruFLP	B2-T9
DIP-⍺-GAL4; UAS>stop>GFP.MyrUAS-FruMA; fruFLP/+	Female	VNC	F									7d_female_3_VNC_DIP⍺_55810_FruMA_fruFLP	B1-D6
DIP-⍺-GAL4; UAS>stop>GFP.MyrUAS-FruMA; fruFLP/+	Female	VNC	F									7d_female_1_VNC_DIP⍺_55810_FruMA_fruFLP	B2-D9
DIP-⍺-GAL4; UAS>stop>GFP.MyrUAS-FruMA; fruFLP/+	Female	VNC	F									7d_female_9_VNC_DIP⍺_55810_FruMA_fruFLP	B2-J3
DIP-⍺-GAL4; UAS>stop>GFP.MyrUAS-FruMA; fruFLP/+	Female	VNC	F									7d_female_14_VNC_DIP⍺_55810_FruMA_fruFLP	B2-O6
DIP-⍺-GAL4; UAS>stop>GFP.MyrUAS-FruMA; fruFLP/+	Female	VNC	F									7d_female_4_VNC_DIP⍺_55810_FruMA_fruFLP	B2-P4
DIP-⍺-GAL4; UAS>stop>GFP.MyrUAS-FruMA; fruFLP/+	Female	VNC	F									7d_female_13_VNC_DIP⍺_55810_FruMA_fruFLP	B2-P8
DIP-⍺-GAL4; UAS>stop>GFP.MyrUAS-FruMA; fruFLP/+	Female	VNC	F									7d_female_8_VNC_DIP⍺_55810_FruMA_fruFLP	B2-Q6
DIP-⍺-GAL4; UAS>stop>GFP.MyrUAS-FruMA; fruFLP/+	Female	VNC	F									7d_female_7_VNC_DIP⍺_55810_FruMA_fruFLP	B1-J7
DIP-⍺-GAL4; UAS>stop>GFP.MyrUAS-FruMA; fruFLP/+	Female	VNC	F									7d_female_15_VNC_DIP⍺_55810_FruMA_fruFLP	B1-J8
DIP-⍺-GAL4; UAS>stop>GFP.MyrUAS-FruMA; fruFLP/+	Female	VNC	M									7d_female_6_VNC_DIP⍺_55810_FruMA_fruFLP	B2-N1
DIP-⍺-GAL4; UAS>stop>GFP.MyrUAS-FruMA; fruFLP/+	Female	VNC	M									7d_female_2_VNC_DIP⍺_55810_FruMA_fruFLP	B1-O1
DIP-⍺-GAL4; UAS>stop>GFP.MyrUAS-FruMA; fruFLP/+	Female	VNC	N.A.									7d_female_11_VNC_DIP⍺_55810_FruMA_fruFLP	B2-D1
DIP-⍺-GAL4; UAS>stop>GFP.MyrUAS-FruMA; fruFLP/+	Female	VNC	N.A.									7d_female_10_VNC_DIP⍺_55810_FruMA_fruFLP	B2-O1
DIP-⍺-GAL4; UAS>stop>GFP.MyrUAS-FruMA; fruFLP/+	Female	VNC	X									7d_female_5_VNC_DIP⍺_55810_FruMA_fruFLP	B2-P7
DIP-⍺-GAL4; UAS>stop>GFP.MyrUAS-FruMA; fruFLP/+	Male	Brain		X, 0	0	A	N	X	M	0		7d_male_4_DIP⍺_55810_FruMA_fruFLP_gfp488_fruM546_nc82633_01152018	B2-T5
DIP-⍺-GAL4; UAS>stop>GFP.MyrUAS-FruMA; fruFLP/+	Male	Brain		U, 0	0	A	N	M	M	0		7d_male_10.1_DIP⍺_55810_FruMA_fruFLP_gfp488_fruM546_nc82633_01152018	B1-C4
DIP-⍺-GAL4; UAS>stop>GFP.MyrUAS-FruMA; fruFLP/+	Male	Brain		U, 0	0	A	N	F	M	0		7d_male_15_DIP⍺_55810_FruMA_fruFLP_gfp488_fruM546_nc82633_01152018	B1-G6
DIP-⍺-GAL4; UAS>stop>GFP.MyrUAS-FruMA; fruFLP/+	Male	Brain		U, 1	0	A	N	M	M	0		7d_male_8_DIP⍺_55810_FruMA_fruFLP_gfp488_fruM546_nc82633_01152018	B1-L4
DIP-⍺-GAL4; UAS>stop>GFP.MyrUAS-FruMA; fruFLP/+	Male	Brain		U, 1	0	A	N	M	M	0		7d_male_3_DIP⍺_55810_FruMA_fruFLP_gfp488_fruM546_nc82633_01152018	B1-L5
DIP-⍺-GAL4; UAS>stop>GFP.MyrUAS-FruMA; fruFLP/+	Male	Brain		U, 0	0	A	Y	M	M	0		7d_male_12_DIP⍺_55810_FruMA_fruFLP_gfp488_fruM546_nc82633_01152018	B1-M4
DIP-⍺-GAL4; UAS>stop>GFP.MyrUAS-FruMA; fruFLP/+	Male	Brain		U, 0	0	A	Y	M	M	1		7d_male_5_DIP⍺_55810_FruMA_fruFLP_gfp488_fruM546_nc82633_01152018	B1-O4
DIP-⍺-GAL4; UAS>stop>GFP.MyrUAS-FruMA; fruFLP/+	Male	Brain		U, 1	0	A	Y	M	M	0		7d_male_8.1_DIP⍺_55810_FruMA_fruFLP_gfp488_fruM546_nc82633_01152018	B1-R6
DIP-⍺-GAL4; UAS>stop>GFP.MyrUAS-FruMA; fruFLP/+	Male	Brain		X, 0	0	A	N	M	M	0		7d_male_11_DIP⍺_55810_FruMA_fruFLP_gfp488_fruM546_nc82633_01152018	B1-Y6
DIP-⍺-GAL4; UAS>stop>GFP.MyrUAS-FruMA; fruFLP/+	Male	Brain		X, 0	1	A	Y	M	M	1		7d_male_6_DIP⍺_55810_FruMA_fruFLP_gfp488_fruM546_nc82633_01152018	B2-B1
DIP-⍺-GAL4; UAS>stop>GFP.MyrUAS-FruMA; fruFLP/+	Male	Brain		U, 0	0	A	Y	M	M	1		7d_male_16_DIP⍺_55810_FruMA_fruFLP_gfp488_fruM546_nc82633_01152018	B2-B2
DIP-⍺-GAL4; UAS>stop>GFP.MyrUAS-FruMA; fruFLP/+	Male	Brain		U, 0	0	A	Y	M	M	1		7d_male_13_DIP⍺_55810_FruMA_fruFLP_gfp488_fruM546_nc82633_01152018	B2-C8
DIP-⍺-GAL4; UAS>stop>GFP.MyrUAS-FruMA; fruFLP/+	Male	Brain		U, 0	0	A	N	M	M	0		7d_male_7_DIP⍺_55810_FruMA_fruFLP_gfp488_fruM546_nc82633_01152018	B2-E9
DIP-⍺-GAL4; UAS>stop>GFP.MyrUAS-FruMA; fruFLP/+	Male	Brain		U, 0	0	A	N	F	F	0		7d_male_14_DIP⍺_55810_FruMA_fruFLP_gfp488_fruM546_nc82633_01152018	B2-F1
DIP-⍺-GAL4; UAS>stop>GFP.MyrUAS-FruMA; fruFLP/+	Male	Brain		U, 0	0	A	N	M	M	2		7d_male_1_DIP⍺_55810_FruMA_fruFLP_gfp488_fruM546_nc82633_01152018	B2-F2
DIP-⍺-GAL4; UAS>stop>GFP.MyrUAS-FruMA; fruFLP/+	Male	Brain		U, 0	0	A	Y	M	M	0		7d_male_9_DIP⍺_55810_FruMA_fruFLP_gfp488_fruM546_nc82633_01152018	B2-H8
DIP-⍺-GAL4; UAS>stop>GFP.MyrUAS-FruMA; fruFLP/+	Male	Brain		U, 0	0	A	N	M	M	0		7d_male_2_DIP⍺_55810_FruMA_fruFLP_gfp488_fruM546_nc82633_01152018	B2-J1
DIP-⍺-GAL4; UAS>stop>GFP.MyrUAS-FruMA; fruFLP/+	Male	Brain		U, 0	0	A	N	M	M	1		7d_male_10_DIP⍺_55810_FruMA_fruFLP_gfp488_fruM546_nc82633_01152018	B2-Q7
DIP-⍺-GAL4; UAS>stop>GFP.MyrUAS-FruMA; fruFLP/+	Female	Brain		U, 0	0	A	N	F	F	0		7d_female_9_DIP⍺_55810_FruMA_fruFLP_gfp488_nc82633_01152018	B1-J5
DIP-⍺-GAL4; UAS>stop>GFP.MyrUAS-FruMA; fruFLP/+	Female	Brain		U, 0	0	P, 2	N	F	F	0		7d_female_7_DIP⍺_55810_FruMA_fruFLP_gfp488_nc82633_01152018	B1-K3
DIP-⍺-GAL4; UAS>stop>GFP.MyrUAS-FruMA; fruFLP/+	Female	Brain		U, 0	1	P, 3	N	F	F	0		7d_female_10_DIP⍺_55810_FruMA_fruFLP_gfp488_nc82633_01152018	B1-K4
DIP-⍺-GAL4; UAS>stop>GFP.MyrUAS-FruMA; fruFLP/+	Female	Brain		X, 0	0	A	N	F	F	0		7d_female_1_DIP⍺_55810_FruMA_fruFLP_gfp488_fruM546_nc82633_01152018	B1-S1
DIP-⍺-GAL4; UAS>stop>GFP.MyrUAS-FruMA; fruFLP/+	Female	Brain		X, 0	0	A	N	F	F	0		7d_female_11_DIP⍺_55810_FruMA_fruFLP_gfp488_fruM546_nc82633_01152018	B1-S5
DIP-⍺-GAL4; UAS>stop>GFP.MyrUAS-FruMA; fruFLP/+	Female	Brain		U, 1	0	A	N	F	F	0		7d_female_12_DIP⍺_55810_FruMA_fruFLP_gfp488_fruM546_nc82633_01152018	B1-W3
DIP-⍺-GAL4; UAS>stop>GFP.MyrUAS-FruMA; fruFLP/+	Female	Brain		U, 1	0	P, 2	N	F	F	0		7d_female_5_DIP⍺_55810_FruMA_fruFLP_gfp488_nc82633_01152018	B1-W9
DIP-⍺-GAL4; UAS>stop>GFP.MyrUAS-FruMA; fruFLP/+	Female	Brain		U, 1	0	P, 3	N	F	F	0		7d_female_15_DIP⍺_55810_FruMA_fruFLP	B1-Y9
DIP-⍺-GAL4; UAS>stop>GFP.MyrUAS-FruMA; fruFLP/+	Female	Brain		U, 2	0	P, 1	N	F	F	0		7d_female_3_DIP⍺_55810_FruMA_fruFLP_gfp488_nc82633_01152018	B1-Z2
DIP-⍺-GAL4; UAS>stop>GFP.MyrUAS-FruMA; fruFLP/+	Female	Brain		U, 1	0	P, 1	N	F	F	0		4d_female_13_DIP⍺_55810_FruMA_fruFLP_gfp488_nc82633_01062018	B1-Z8
DIP-⍺-GAL4; UAS>stop>GFP.MyrUAS-FruMA; fruFLP/+	Female	Brain		U, 1	0	A, 1	N	F	F	0		7d_female_6_DIP⍺_55810_FruMA_fruFLP_gfp488_nc82633_01152018	B2-A4
DIP-⍺-GAL4; UAS>stop>GFP.MyrUAS-FruMA; fruFLP/+	Female	Brain		U, 1	0	P, 1	N	F	M	0		7d_female_4_DIP⍺_55810_FruMA_fruFLP_gfp488_nc82633_01152018	B2-F4
DIP-⍺-GAL4; UAS>stop>GFP.MyrUAS-FruMA; fruFLP/+	Female	Brain		U, 2	0	P, 1	N	N.A.	F	0		4d_female_14_DIP⍺_55810_FruMA_fruFLP_gfp488_nc82633_01062018	B2-G9
DIP-⍺-GAL4; UAS>stop>GFP.MyrUAS-FruMA; fruFLP/+	Female	Brain		U, 0	0	P, 2	N	F	F	0		7d_female_8_DIP⍺_55810_FruMA_fruFLP_gfp488_nc82633_01152018	B2-K4
DIP-⍺-GAL4; UAS>stop>GFP.MyrUAS-FruMA; fruFLP/+	Female	Brain		U, 0	0	P, 3	N	F	F	0		7d_female_16_DIP⍺_55810_FruMA_fruFLP	B2-R6
DIP-⍺-GAL4; UAS>stop>GFP.MyrUAS-FruMA; fruFLP/+	Female	Brain		X, 0	0	A	N	M	M	0		7d_female_2_DIP⍺_55810_FruMA_fruFLP_gfp488_fruM546_nc82633_01152018	B2-H4
Ex4			Projection pattern in AbG of VNC	U shaped projection pattern & number of neuron body in SEG	Lateral assending projection in VLP	Square shaped projection pattern in VLP	M shaped projection pattern above AL in the Medial Part of Midbrain	Horizontal projection in the Medial Part of Midbrain	Protocerebral projection in SMP	mAL neuron
Genotype	Sex	Sample	Male-Like Pattern (M) vs No signal (X) vs Female-Like Pattern (F)	Presence of U shaped pattern (U), Absense of signal (X); Number (#) of neuron body	Number (#) of lateral assending projection	Absense (A) vs Presence (P) of Square shaped pattern, Number (#) of the corresponding neuron body	Presence of M shaped projection pattern (YES/NO)	Male-Like Pattern (M) vs No signal (X) vs Female-Like Pattern (F)	Male-Like Pattern (M) vs Female-Like Pattern (F)	Number (#) of mAL neuron		File Name	Blind Number
DIP-⍺-GAL4; UAS>stop>GFP.Myr/UAS-FruMB; fruFLP/+	Male	VNC	F									7d_male_5_VNC_DIP⍺_55810_FruMB_fruFLP	B2-C4
DIP-⍺-GAL4; UAS>stop>GFP.Myr/UAS-FruMB; fruFLP/+	Male	VNC	M									7d_male_11_VNC_DIP⍺_55810_FruMB_fruFLP	B2-U3
DIP-⍺-GAL4; UAS>stop>GFP.Myr/UAS-FruMB; fruFLP/+	Male	VNC	M									7d_male_3_VNC_DIP⍺_55810_FruMB_fruFLP	B2-U4
DIP-⍺-GAL4; UAS>stop>GFP.Myr/UAS-FruMB; fruFLP/+	Male	VNC	M									7d_male_14_VNC_DIP⍺_55810_FruMB_fruFLP	B1-D2
DIP-⍺-GAL4; UAS>stop>GFP.Myr/UAS-FruMB; fruFLP/+	Male	VNC	M									7d_male_12_VNC_DIP⍺_55810_FruMB_fruFLP	B1-D3
DIP-⍺-GAL4; UAS>stop>GFP.Myr/UAS-FruMB; fruFLP/+	Male	VNC	M									7d_male_1_VNC_DIP⍺_55810_FruMB_fruFLP	B1-K2
DIP-⍺-GAL4; UAS>stop>GFP.Myr/UAS-FruMB; fruFLP/+	Male	VNC	M									7d_male_6_VNC_DIP⍺_55810_FruMB_fruFLP	B1-Q4
DIP-⍺-GAL4; UAS>stop>GFP.Myr/UAS-FruMB; fruFLP/+	Male	VNC	M									7d_male_2_VNC_DIP⍺_55810_FruMB_fruFLP	B1-X5
DIP-⍺-GAL4; UAS>stop>GFP.Myr/UAS-FruMB; fruFLP/+	Male	VNC	M									7d_male_13_VNC_DIP⍺_55810_FruMB_fruFLP	B2-H1
DIP-⍺-GAL4; UAS>stop>GFP.Myr/UAS-FruMB; fruFLP/+	Male	VNC	M									7d_male_8_VNC_DIP⍺_55810_FruMB_fruFLP	B2-M4
DIP-⍺-GAL4; UAS>stop>GFP.Myr/UAS-FruMB; fruFLP/+	Male	VNC	M									7d_male_4_VNC_DIP⍺_55810_FruMB_fruFLP	B1-F9
DIP-⍺-GAL4; UAS>stop>GFP.Myr/UAS-FruMB; fruFLP/+	Male	VNC	M									7d_male_10_VNC_DIP⍺_55810_FruMB_fruFLP	B2-A7
DIP-⍺-GAL4; UAS>stop>GFP.Myr/UAS-FruMB; fruFLP/+	Male	VNC	N.A.									7d_male_7_VNC_DIP⍺_55810_FruMB_fruFLP	B2-B4
DIP-⍺-GAL4; UAS>stop>GFP.Myr/UAS-FruMB; fruFLP/+	Male	VNC	X									7d_male_9_VNC_DIP⍺_55810_FruMB_fruFLP	B1-X7
DIP-⍺-GAL4; UAS>stop>GFP.Myr/UAS-FruMB; fruFLP/+	Male	VNC	X x2 (2 VNCs were mounted together)									7d_male_1516_VNC_DIP⍺_55810_FruMB_fruFLP	B1-X2
DIP-⍺-GAL4; UAS>stop>GFP.Myr/UAS-FruMB; fruFLP/+	Female	VNC	F									7d_female_16_vnc_DIP⍺_55810_FruMB_fruFLP	B1-A2
DIP-⍺-GAL4; UAS>stop>GFP.Myr/UAS-FruMB; fruFLP/+	Female	VNC	F									7d_female_10_vnc_DIP⍺_55810_FruMB_fruFLP	B1-K8
DIP-⍺-GAL4; UAS>stop>GFP.Myr/UAS-FruMB; fruFLP/+	Female	VNC	F									7d_female_11_vnc_DIP⍺_55810_FruMB_fruFLP	B1-P2
DIP-⍺-GAL4; UAS>stop>GFP.Myr/UAS-FruMB; fruFLP/+	Female	VNC	F									7d_female_2_vnc_DIP⍺_55810_FruMB_fruFLP	B2-C3
DIP-⍺-GAL4; UAS>stop>GFP.Myr/UAS-FruMB; fruFLP/+	Female	VNC	F									7d_female_15_vnc_DIP⍺_55810_FruMB_fruFLP	B2-G6
DIP-⍺-GAL4; UAS>stop>GFP.Myr/UAS-FruMB; fruFLP/+	Female	VNC	F									7d_female_3_VNC_DIP⍺_55810_FruMB_fruFLP	B2-N3
DIP-⍺-GAL4; UAS>stop>GFP.Myr/UAS-FruMB; fruFLP/+	Female	VNC	F									7d_female_7_vnc_DIP⍺_55810_FruMB_fruFLP	B2-P2
DIP-⍺-GAL4; UAS>stop>GFP.Myr/UAS-FruMB; fruFLP/+	Female	VNC	F									7d_female_1_vnc_DIP⍺_55810_FruMB_fruFLP	B2-P6
DIP-⍺-GAL4; UAS>stop>GFP.Myr/UAS-FruMB; fruFLP/+	Female	VNC	F									7d_female_6_vnc_DIP⍺_55810_FruMB_fruFLP	B2-T6
DIP-⍺-GAL4; UAS>stop>GFP.Myr/UAS-FruMB; fruFLP/+	Female	VNC	F									7d_female_8_vnc_DIP⍺_55810_FruMB_fruFLP	B2-A1
DIP-⍺-GAL4; UAS>stop>GFP.Myr/UAS-FruMB; fruFLP/+	Female	VNC	F									7d_female_12_vnc_DIP⍺_55810_FruMB_fruFLP	B2-B3
DIP-⍺-GAL4; UAS>stop>GFP.Myr/UAS-FruMB; fruFLP/+	Female	VNC	F									7d_female_13_vnc_DIP⍺_55810_FruMB_fruFLP	B2-J9
DIP-⍺-GAL4; UAS>stop>GFP.Myr/UAS-FruMB; fruFLP/+	Female	VNC	M									7d_female_5_vnc_DIP⍺_55810_FruMB_fruFLP	B1-T7
DIP-⍺-GAL4; UAS>stop>GFP.Myr/UAS-FruMB; fruFLP/+	Female	VNC	M									7d_female_9_vnc_DIP⍺_55810_FruMB_fruFLP	B1-U9
DIP-⍺-GAL4; UAS>stop>GFP.Myr/UAS-FruMB; fruFLP/+	Female	VNC	M									7d_female_14_vnc_DIP⍺_55810_FruMB_fruFLP	B2-A3
DIP-⍺-GAL4; UAS>stop>GFP.Myr/UAS-FruMB; fruFLP/+	Female	VNC	X									7d_female_4_vnc_DIP⍺_55810_FruMB_fruFLP	B2-Q9
DIP-⍺-GAL4; UAS>stop>GFP.Myr/UAS-FruMB; fruFLP/+	Male	Brain		X, No U, 0	0	A	Y	M	M	0		7d_male_2_DIP⍺_55810_FruMB_fruFLP_gfp488_fruM546_nc82633_01152018	B1-A8
DIP-⍺-GAL4; UAS>stop>GFP.Myr/UAS-FruMB; fruFLP/+	Male	Brain		X, No U, 0	0	A	Y	M	M	0		7d_male_10_DIP⍺_55810_FruMB_fruFLP_gfp488_fruM546_nc82633_01152018	B1-D8
DIP-⍺-GAL4; UAS>stop>GFP.Myr/UAS-FruMB; fruFLP/+	Male	Brain		X, No U, 0	2	A	Y	M	M	0		7d_male_16_DIP⍺_55810_FruMB_fruFLP	B1-E4
DIP-⍺-GAL4; UAS>stop>GFP.Myr/UAS-FruMB; fruFLP/+	Male	Brain		X, No U, 0	0	A	N	M	M	0		7d_male_9_DIP⍺_55810_FruMB_fruFLP_gfp488_fruM546_nc82633_01152018	B1-G3
DIP-⍺-GAL4; UAS>stop>GFP.Myr/UAS-FruMB; fruFLP/+	Male	Brain		X, 0	0	A	Y	M	M	0		7d_male_13_DIP⍺_55810_FruMB_fruFLP	B1-M1
DIP-⍺-GAL4; UAS>stop>GFP.Myr/UAS-FruMB; fruFLP/+	Male	Brain		X, 0	0	A	Y	M	M	0		7d_male_3_DIP⍺_55810_FruMB_fruFLP_gfp488_fruM546_nc82633_01152018	B1-M5
DIP-⍺-GAL4; UAS>stop>GFP.Myr/UAS-FruMB; fruFLP/+	Male	Brain		X, 0	0	A	Y	M	M	2		7d_male_8_DIP⍺_55810_FruMB_fruFLP_gfp488_fruM546_nc82633_01152018	B1-P4
DIP-⍺-GAL4; UAS>stop>GFP.Myr/UAS-FruMB; fruFLP/+	Male	Brain		X, 0	0	A	Y	M	M	0		7d_male_14_DIP⍺_55810_FruMB_fruFLP	B1-P9
DIP-⍺-GAL4; UAS>stop>GFP.Myr/UAS-FruMB; fruFLP/+	Male	Brain		X, 0	0	A	Y	M	M	0		7d_male_12_DIP⍺_55810_FruMB_fruFLP	B1-R9
DIP-⍺-GAL4; UAS>stop>GFP.Myr/UAS-FruMB; fruFLP/+	Male	Brain		X, 0	0	A	Y	M	M	0		7d_male_4_DIP⍺_55810_FruMB_fruFLP_gfp488_fruM546_nc82633_01152018	B1-V9
DIP-⍺-GAL4; UAS>stop>GFP.Myr/UAS-FruMB; fruFLP/+	Male	Brain		X, 0	0	A	Y	M	M	0		7d_male_1_DIP⍺_55810_FruMB_fruFLP_gfp488_fruM546_nc82633_01152018	B1-X4
DIP-⍺-GAL4; UAS>stop>GFP.Myr/UAS-FruMB; fruFLP/+	Male	Brain		X, 0	0	A	Y	M	M	0		7d_male_15_DIP⍺_55810_FruMB_fruFLP	B2-D6
DIP-⍺-GAL4; UAS>stop>GFP.Myr/UAS-FruMB; fruFLP/+	Male	Brain		X, 0	0	A	Y	M	M	0		7d_male_5_DIP⍺_55810_FruMB_fruFLP_gfp488_fruM546_nc82633_01152018	B2-G5
DIP-⍺-GAL4; UAS>stop>GFP.Myr/UAS-FruMB; fruFLP/+	Male	Brain		X, 0	0	A	Y	M	M	0		7d_male_7_DIP⍺_55810_FruMB_fruFLP_gfp488_fruM546_nc82633_01152018	B2-L4
DIP-⍺-GAL4; UAS>stop>GFP.Myr/UAS-FruMB; fruFLP/+	Male	Brain		X, No U, 1	0	A	Y	M	M	0		7d_male_6_DIP⍺_55810_FruMB_fruFLP_gfp488_fruM546_nc82633_01152018	B2-Q1
DIP-⍺-GAL4; UAS>stop>GFP.Myr/UAS-FruMB; fruFLP/+	Male	Brain		X, 0	0	A	Y	M	M	0		7d_male_11_DIP⍺_55810_FruMB_fruFLP_gfp488_fruM546_nc82633_01152018	B2-T1
DIP-⍺-GAL4; UAS>stop>GFP.Myr/UAS-FruMB; fruFLP/+	Female	Brain		U, 1	2	A	N	F	F	0		7d_female_7_DIP⍺_55810_FruMB_fruFLP_gfp488_nc82633_01152018	B1-G7
DIP-⍺-GAL4; UAS>stop>GFP.Myr/UAS-FruMB; fruFLP/+	Female	Brain		U, 2	3	A	N	F	F	0		7d_female_2_DIP⍺_55810_FruMB_fruFLP_gfp488_fruM546_nc82633_01152018	B1-H3
DIP-⍺-GAL4; UAS>stop>GFP.Myr/UAS-FruMB; fruFLP/+	Female	Brain		U, 0	2	P, 1	N	F	F	0		7d_female_3_DIP⍺_55810_FruMB_fruFLP_gfp488_fruM546_nc82633_01152018	B1-J3
DIP-⍺-GAL4; UAS>stop>GFP.Myr/UAS-FruMB; fruFLP/+	Female	Brain		U, 1	2	P, 1	N	F	F	0		7d_female_9_DIP⍺_55810_FruMB_fruFLP_gfp488_nc82633_01152018	B1-J6
DIP-⍺-GAL4; UAS>stop>GFP.Myr/UAS-FruMB; fruFLP/+	Female	Brain		U, 1	0	A	N	F	F	0		7d_female_11_DIP⍺_55810_FruMB_fruFLP_gfp488_nc82633_01152018	B1-R2
DIP-⍺-GAL4; UAS>stop>GFP.Myr/UAS-FruMB; fruFLP/+	Female	Brain		U, 2	0	A	N	F	F	0		7d_female_10_DIP⍺_55810_FruMB_fruFLP_gfp488_nc82633_01152018	B1-V2
DIP-⍺-GAL4; UAS>stop>GFP.Myr/UAS-FruMB; fruFLP/+	Female	Brain		U, 2	2	P, 1	N	F	F	0		7d_female_13_DIP⍺_55810_FruMB_fruFLP	B1-V3
DIP-⍺-GAL4; UAS>stop>GFP.Myr/UAS-FruMB; fruFLP/+	Female	Brain		U, 2	0	A	N	F	F	1		7d_female_12_DIP⍺_55810_FruMB_fruFLP_gfp488_nc82633_01152018	B1-Y2
DIP-⍺-GAL4; UAS>stop>GFP.Myr/UAS-FruMB; fruFLP/+	Female	Brain		U, 2	2	A	N	F	F	0		7d_female_8_DIP⍺_55810_FruMB_fruFLP_gfp488_nc82633_01152018	B1-Z7
DIP-⍺-GAL4; UAS>stop>GFP.Myr/UAS-FruMB; fruFLP/+	Female	Brain		U, 0	2	P, 1	N	F	F	0		7d_female_6_DIP⍺_55810_FruMB_fruFLP_gfp488_nc82633_01152018	B2-E3
DIP-⍺-GAL4; UAS>stop>GFP.Myr/UAS-FruMB; fruFLP/+	Female	Brain		U, 1	3	P, 0	N	F	F	0		7d_female_14_DIP⍺_55810_FruMB_fruFLP	B2-E7
DIP-⍺-GAL4; UAS>stop>GFP.Myr/UAS-FruMB; fruFLP/+	Female	Brain		X, No U, 1	1	A	N	F	F	0		7d_female_15_DIP⍺_55810_FruMB_fruFLP	B2-L1
DIP-⍺-GAL4; UAS>stop>GFP.Myr/UAS-FruMB; fruFLP/+	Female	Brain		U, 2	1	P, 1	N	F	F	0		7d_female_5_DIP⍺_55810_FruMB_fruFLP_gfp488_nc82633_01152018	B2-M3
DIP-⍺-GAL4; UAS>stop>GFP.Myr/UAS-FruMB; fruFLP/+	Female	Brain		U, 2	2	P, 1	N	F	F	0		7d_female_4_DIP⍺_55810_FruMB_fruFLP_gfp488_fruM546_nc82633_01152018	B2-N5
DIP-⍺-GAL4; UAS>stop>GFP.Myr/UAS-FruMB; fruFLP/+	Female	Brain		X, 0	3	P, 0	N	F	F	0		7d_female_1_DIP⍺_55810_FruMB_fruFLP_gfp488_fruM546_nc82633_01152018	B2-Q3
Ex5		Tissue Regions→	Projection pattern in AbG of VNC	U shaped projection pattern & number of neuron body in SEG	Lateral assending projection in VLP	Square shaped projection pattern in VLP	M shaped projection pattern above AL in the Medial Part of Midbrain	Horizontal projection in the Medial Part of Midbrain	Protocerebral projection in SMP	mAL neuron
Genotype	Sex	Sample	Male-Like Pattern (M) vs No signal (X) vs Female-Like Pattern (F)	Presence of U shaped pattern (U), Absense of signal (X); Number (#) of neuron body	Number (#) of lateral assending projection	Absense (A) vs Presence (P) of Square shaped pattern, Number (#) of the corresponding neuron body	Presence of M shaped projection pattern (YES/NO)	Male-Like Pattern (M) vs No signal (X) vs Female-Like Pattern (F)	Male-Like Pattern (M) vs Female-Like Pattern (F)	Number (#) of mAL neuron		File Name	Blind Number
DIP-⍺-GAL4; UAS>stop>GFP.Myr/UAS-FruMC; fruFLP/+	Male	VNC	M									7d_male_10_VNC_DIP⍺_55810_FruMC_fruFLP	B1-A7
DIP-⍺-GAL4; UAS>stop>GFP.Myr/UAS-FruMC; fruFLP/+	Male	VNC	M									7d_male_5_VNC_DIP⍺_55810_FruMC_fruFLP	B1-N5
DIP-⍺-GAL4; UAS>stop>GFP.Myr/UAS-FruMC; fruFLP/+	Male	VNC	M									7d_male_2_VNC_DIP⍺_55810_FruMC_fruFLP	B1-N8
DIP-⍺-GAL4; UAS>stop>GFP.Myr/UAS-FruMC; fruFLP/+	Male	VNC	M									7d_male_9_VNC_DIP⍺_55810_FruMC_fruFLP	B1-Y1
DIP-⍺-GAL4; UAS>stop>GFP.Myr/UAS-FruMC; fruFLP/+	Male	VNC	M									7d_male_14_VNC_DIP⍺_55810_FruMC_fruFLP	B2-G4
DIP-⍺-GAL4; UAS>stop>GFP.Myr/UAS-FruMC; fruFLP/+	Male	VNC	M									7d_male_8_VNC_DIP⍺_55810_FruMC_fruFLP	B2-H9
DIP-⍺-GAL4; UAS>stop>GFP.Myr/UAS-FruMC; fruFLP/+	Male	VNC	M									7d_male_12_VNC_DIP⍺_55810_FruMC_fruFLP	B2-L2
DIP-⍺-GAL4; UAS>stop>GFP.Myr/UAS-FruMC; fruFLP/+	Male	VNC	M									7d_male_1_VNC_DIP⍺_55810_FruMC_fruFLP	B2-N9
DIP-⍺-GAL4; UAS>stop>GFP.Myr/UAS-FruMC; fruFLP/+	Male	VNC	M									7d_male_11_VNC_DIP⍺_55810_FruMC_fruFLP	B2-T2
DIP-⍺-GAL4; UAS>stop>GFP.Myr/UAS-FruMC; fruFLP/+	Male	VNC	X									7d_male_7_VNC_DIP⍺_55810_FruMC_fruFLP	B1-C6
DIP-⍺-GAL4; UAS>stop>GFP.Myr/UAS-FruMC; fruFLP/+	Male	VNC	X									7d_male_16_VNC_DIP⍺_55810_FruMC_fruFLP	B1-S4
DIP-⍺-GAL4; UAS>stop>GFP.Myr/UAS-FruMC; fruFLP/+	Male	VNC	X									7d_male_4_VNC_DIP⍺_55810_FruMC_fruFLP	B2-A6
DIP-⍺-GAL4; UAS>stop>GFP.Myr/UAS-FruMC; fruFLP/+	Male	VNC	X									7d_male_15_VNC_DIP⍺_55810_FruMC_fruFLP	B2-G1
DIP-⍺-GAL4; UAS>stop>GFP.Myr/UAS-FruMC; fruFLP/+	Male	VNC	X									7d_male_13_VNC_DIP⍺_55810_FruMC_fruFLP	B2-N4
DIP-⍺-GAL4; UAS>stop>GFP.Myr/UAS-FruMC; fruFLP/+	Male	VNC	X									7d_male_3_VNC_DIP⍺_55810_FruMC_fruFLP	B2-S8
DIP-⍺-GAL4; UAS>stop>GFP.Myr/UAS-FruMC; fruFLP/+	Male	VNC	X									7d_male_6_VNC_DIP⍺_55810_FruMC_fruFLP	B1-Y7
DIP-⍺-GAL4; UAS>stop>GFP.Myr/UAS-FruMC; fruFLP/+	Female	VNC	F									7d_female_4_VNC__DIP⍺_55810_FruMC_fruFLP	B1-A6
DIP-⍺-GAL4; UAS>stop>GFP.Myr/UAS-FruMC; fruFLP/+	Female	VNC	F									7d_female_12_VNC_DIP⍺_55810_FruMC_fruFLP	B1-B6
DIP-⍺-GAL4; UAS>stop>GFP.Myr/UAS-FruMC; fruFLP/+	Female	VNC	F									7d_female_10_VNC_DIP⍺_55810_FruMC_fruFLP	B1-C1
DIP-⍺-GAL4; UAS>stop>GFP.Myr/UAS-FruMC; fruFLP/+	Female	VNC	F									7d_female_11_VNC_DIP⍺_55810_FruMC_fruFLP	B1-E6
DIP-⍺-GAL4; UAS>stop>GFP.Myr/UAS-FruMC; fruFLP/+	Female	VNC	F									7d_female_8_VNC_DIP⍺_55810_FruMC_fruFLP	B1-F1
DIP-⍺-GAL4; UAS>stop>GFP.Myr/UAS-FruMC; fruFLP/+	Female	VNC	F									7d_female_5_VNC__DIP⍺_55810_FruMC_fruFLP	B1-H8
DIP-⍺-GAL4; UAS>stop>GFP.Myr/UAS-FruMC; fruFLP/+	Female	VNC	F									7d_female_9_VNC_DIP⍺_55810_FruMC_fruFLP	B1-H9
DIP-⍺-GAL4; UAS>stop>GFP.Myr/UAS-FruMC; fruFLP/+	Female	VNC	F									7d_female_6_VNC__DIP⍺_55810_FruMC_fruFLP	B1-J9
DIP-⍺-GAL4; UAS>stop>GFP.Myr/UAS-FruMC; fruFLP/+	Female	VNC	F									7d_female_13_VNC_DIP⍺_55810_FruMC_fruFLP	B2-F3
DIP-⍺-GAL4; UAS>stop>GFP.Myr/UAS-FruMC; fruFLP/+	Female	VNC	F									7d_female_7_VNC_DIP⍺_55810_FruMC_fruFLP	B2-K2
DIP-⍺-GAL4; UAS>stop>GFP.Myr/UAS-FruMC; fruFLP/+	Female	VNC	F									7d_female_15_VNC_DIP⍺_55810_FruMC_fruFLP	B2-K3
DIP-⍺-GAL4; UAS>stop>GFP.Myr/UAS-FruMC; fruFLP/+	Female	VNC	F									7d_female_3_VNC__DIP⍺_55810_FruMC_fruFLP	B2-M2
DIP-⍺-GAL4; UAS>stop>GFP.Myr/UAS-FruMC; fruFLP/+	Female	VNC	F									7d_female_14_VNC_DIP⍺_55810_FruMC_fruFLP	B2-N8
DIP-⍺-GAL4; UAS>stop>GFP.Myr/UAS-FruMC; fruFLP/+	Female	VNC	F									7d_female_2_VNC__DIP⍺_55810_FruMC_fruFLP	B2-S9
DIP-⍺-GAL4; UAS>stop>GFP.Myr/UAS-FruMC; fruFLP/+	Female	VNC	M									7d_female_16_VNC_DIP⍺_55810_FruMC_fruFLP	B1-D7
DIP-⍺-GAL4; UAS>stop>GFP.Myr/UAS-FruMC; fruFLP/+	Female	VNC	X									7d_female_1_VNC__DIP⍺_55810_FruMC_fruFLP	B2-E4
DIP-⍺-GAL4; UAS>stop>GFP.Myr/UAS-FruMC; fruFLP/+	Male	Brain		X, 0	0	A	N	X	M	1		7d_male_10_DIP⍺_55810_FruMC_fruFLP	B1-O2
DIP-⍺-GAL4; UAS>stop>GFP.Myr/UAS-FruMC; fruFLP/+	Male	Brain		X, 0	1	A	N	X	M	0		7d_male_6_DIP⍺_55810_FruMC_fruFLP_gfp488_nc82633_02052019	B1-O6
DIP-⍺-GAL4; UAS>stop>GFP.Myr/UAS-FruMC; fruFLP/+	Male	Brain		X, 0	0	A	N	X	M	0		7d_male_12_DIP⍺_55810_FruMC_fruFLP	B1-P7
DIP-⍺-GAL4; UAS>stop>GFP.Myr/UAS-FruMC; fruFLP/+	Male	Brain		X, 0	0	A	N	X	M	0		7d_male_11_DIP⍺_55810_FruMC_fruFLP	B1-Q5
DIP-⍺-GAL4; UAS>stop>GFP.Myr/UAS-FruMC; fruFLP/+	Male	Brain		X, 0	0	A	N	X	M	1		7d_male_9_DIP⍺_55810_FruMC_fruFLP	B1-Q6
DIP-⍺-GAL4; UAS>stop>GFP.Myr/UAS-FruMC; fruFLP/+	Male	Brain		X, 0	1	P, 1	N	X	M	0		7d_male_14_DIP⍺_55810_FruMC_fruFLP	B1-U8
DIP-⍺-GAL4; UAS>stop>GFP.Myr/UAS-FruMC; fruFLP/+	Male	Brain		X, 0	0	A	N	X	M	0		7d_male_16_DIP⍺_55810_FruMC_fruFLP	B1-W6
DIP-⍺-GAL4; UAS>stop>GFP.Myr/UAS-FruMC; fruFLP/+	Male	Brain		X, 0	0	A	N	X	M	0		5d_male_1_DIP⍺_55810_FruMC_fruFLP_gfp488_nc82633_01112018	B1-W8
DIP-⍺-GAL4; UAS>stop>GFP.Myr/UAS-FruMC; fruFLP/+	Male	Brain		X, 0	0	P, 1	N	X	M	0		7d_male_8_DIP⍺_55810_FruMC_fruFLP_gfp488_nc82633_02052019	B2-C7
DIP-⍺-GAL4; UAS>stop>GFP.Myr/UAS-FruMC; fruFLP/+	Male	Brain		X, 0	0	A	N	X	F	1		7d_male_7_DIP⍺_55810_FruMC_fruFLP_gfp488_nc82633_02052019	B2-D3
DIP-⍺-GAL4; UAS>stop>GFP.Myr/UAS-FruMC; fruFLP/+	Male	Brain		X, 0	0	A	N	X	M	0		7d_male_15_DIP⍺_55810_FruMC_fruFLP	B2-F7
DIP-⍺-GAL4; UAS>stop>GFP.Myr/UAS-FruMC; fruFLP/+	Male	Brain		X, 0	1	A	N	X	M	1		4d_male_2_DIP⍺_55810_FruMC_fruFLP_gfp488_nc82633_02052019	B2-T7
DIP-⍺-GAL4; UAS>stop>GFP.Myr/UAS-FruMC; fruFLP/+	Male	Brain		X, no U, 0	0	A	N	X	M	0		4d_male_3_DIP⍺_55810_FruMC_fruFLP_gfp488_nc82633_02052019	B1-C3
DIP-⍺-GAL4; UAS>stop>GFP.Myr/UAS-FruMC; fruFLP/+	Male	Brain		X, 0	0	P, 1	N	X	M	0		7d_male_4_DIP⍺_55810_FruMC_fruFLP_gfp488_nc82633_02052019	B2-G3
DIP-⍺-GAL4; UAS>stop>GFP.Myr/UAS-FruMC; fruFLP/+	Male	Brain		X, 0	0	A	N	X	F	0		7d_male_5_DIP⍺_55810_FruMC_fruFLP_gfp488_nc82633_02052019	B2-L3
DIP-⍺-GAL4; UAS>stop>GFP.Myr/UAS-FruMC; fruFLP/+	Male	Brain		X, 0	0	A	N	X	M	0		7d_male_13_DIP⍺_55810_FruMC_fruFLP	B2-P3
DIP-⍺-GAL4; UAS>stop>GFP.Myr/UAS-FruMC; fruFLP/+	Female	Brain		U, 1	0	A	N	X	F	0		5d_female_1_DIP⍺_55810_FruMC_fruFLP_gfp488_nc82633_01112018	B1-G8
DIP-⍺-GAL4; UAS>stop>GFP.Myr/UAS-FruMC; fruFLP/+	Female	Brain		U, 1	0	A	N	F	F	0		7d_female_5_DIP⍺_55810_FruMC_fruFLP_gfp488_nc82633_01152018	B1-H2
DIP-⍺-GAL4; UAS>stop>GFP.Myr/UAS-FruMC; fruFLP/+	Female	Brain		X, 0	0	A	N	X	F	1		7d_female_6_DIP⍺_55810_FruMC_fruFLP_FRUM546_gfp488_nc82633_20190215	B1-L1
DIP-⍺-GAL4; UAS>stop>GFP.Myr/UAS-FruMC; fruFLP/+	Female	Brain		X, 0	0	P, 1	N	F	F	0		7d_female_8_DIP⍺_55810_FruMC_fruFLP_FRUM546_gfp488_nc82633_20190215	B1-M9
DIP-⍺-GAL4; UAS>stop>GFP.Myr/UAS-FruMC; fruFLP/+	Female	Brain		U, 1	0	A	N	X	F	1		7d_female_9_DIP⍺_55810_FruMC_fruFLP_FRUM546_gfp488_nc82633_20190205	B1-O5
DIP-⍺-GAL4; UAS>stop>GFP.Myr/UAS-FruMC; fruFLP/+	Female	Brain		X, 0	0	P, 3	N	X	M	1		5d_female_2_DIP⍺_55810_FruMC_fruFLP_gfp488_nc82633_01112018	B1-P6
DIP-⍺-GAL4; UAS>stop>GFP.Myr/UAS-FruMC; fruFLP/+	Female	Brain		X, 0	0	A	N	X	F	0		5d_female_4_DIP⍺_55810_FruMC_fruFLP_gfp488_nc82633_01112018	B1-S8
DIP-⍺-GAL4; UAS>stop>GFP.Myr/UAS-FruMC; fruFLP/+	Female	Brain		U, 0	0	A	N	F	F	0		7d_female_15_DIP⍺_55810_FruMC_fruFLP_FRUM546_gfp488_nc82633_20190205	B1-T5
DIP-⍺-GAL4; UAS>stop>GFP.Myr/UAS-FruMC; fruFLP/+	Female	Brain		U, 1	1	P, 1	N	F	F	0		7d_female_13_DIP⍺_55810_FruMC_fruFLP_FRUM546_gfp488_nc82633_20190205	B1-W7
DIP-⍺-GAL4; UAS>stop>GFP.Myr/UAS-FruMC; fruFLP/+	Female	Brain		X, 0	0	A	N	X	F	0		7d_female_12_DIP⍺_55810_FruMC_fruFLP_FRUM546_gfp488_nc82633_20190205	B1-Y5
DIP-⍺-GAL4; UAS>stop>GFP.Myr/UAS-FruMC; fruFLP/+	Female	Brain		U, 0	0	A	N	X	F	1		7d_female_10_DIP⍺_55810_FruMC_fruFLP_FRUM546_gfp488_nc82633_20190205	B2-E2
DIP-⍺-GAL4; UAS>stop>GFP.Myr/UAS-FruMC; fruFLP/+	Female	Brain		X, 0	0	A	N	F	F	1		7d_female_7_DIP⍺_55810_FruMC_fruFLP_FRUM546_gfp488_nc82633_20190215	B2-F8
DIP-⍺-GAL4; UAS>stop>GFP.Myr/UAS-FruMC; fruFLP/+	Female	Brain		U, 1	0	P, 1	N	F	F	0		5d_female_3_DIP⍺_55810_FruMC_fruFLP_gfp488_nc82633_01112018	B2-H2
DIP-⍺-GAL4; UAS>stop>GFP.Myr/UAS-FruMC; fruFLP/+	Female	Brain		X, 0	0	P, 1	N	X	F	1		7d_female_11_DIP⍺_55810_FruMC_fruFLP_FRUM546_gfp488_nc82633_20190205	B2-R3
DIP-⍺-GAL4; UAS>stop>GFP.Myr/UAS-FruMC; fruFLP/+	Female	Brain		X, 0	0	P, 1	N	F	F	0		7d_female_14_DIP⍺_55810_FruMC_fruFLP_FRUM546_gfp488_nc82633_20190205	B2-S3

## Sheet: 4A. Overexpressor Summary 2
With tubGal80
Summary of set 2 of the sccoring of overexpressors: Overexpression of sex hierarchy related genes in DIP-⍺ and fru P1 intersecting cells. (Control: DIP-⍺-GAL4; UAS>stop>GFP.Myr/+; fruFLP/tub>GAL80>)
		Projection pattern in AbG of VNC	"U" shaped projection pattern & number of neuron bodies in SEG	Lateral assending projection in VLP	"Square" shaped projection pattern in VLP	"M" shaped projection pattern above AL in the Medial Part of Midbrain	Horizontal projection in the Medial Part of Midbrain	Protocerebral projection in SMP	mAL neuron
Genotype	Sex	Male-Like Pattern (M) vs No signal(X) vs Female-Like Pattern (F)	Presence of U shaped pattern (P), Absense of pattern (A); Number (#) of neuron bodies	Number (#) of lateral assending projections	Absense (A) vs Presence (P) of "Square" shaped pattern	Number of samples with M pattern/ Number of total sample size	Male-Like Pattern (M) vs No signal (X) vs Female-Like Pattern (F)	Male-Like Pattern (M) vs Female-Like Pattern (F)	Number of samples with at least 1 mAL neuron/ Number of total sample size
DIP-⍺-GAL4; UAS>stop>GFP.Myr/+; fruFLP/tub>GAL80>	M	M 9/16; X 7/16; F 0/16	P 3/15; A 12/15; 0 neuron 14/15; 1 neuron 1/15	0 neuron 14/15, 1 neuron 1/15	A 15/15; P 0/15	M 9/15	M 14/15; X 1/15; F 0/15	M 14/15; F 1/15	mAL 1/15
DIP-⍺-GAL4; UAS>stop>GFP.Myr/+; fruFLP/tub>GAL80>	F	M 0/17; X 3/17; F 14/17	P 1/15; A 14/15; 0 neuron 2/15; 1 neuron 8/15; 2 neuron 5/15	0 neuron 15/15	A 13/15; P 2/15	M 1/15	M 0/15; X 0/15; F 15/15	M 0/15; F 15/15	mAL 1/15
DIP-⍺-GAL4; UAS>stop>GFP.Myr/UAS-TraF; fruFLP/tub>GAL80>	M	M 2/18; X 10/18; F 6/18	P 7/18; A 11/18; 0 neuron 16/19; 1 neuron 3/19	0 neuron 2/19; 1 neuron 9/19; 2 neuron 8/19	A 16/19; P 3/19	M 14/19	M 18/19; X 0/19; F 1/19	M 13/18; F 5/18	mAL 0/18
DIP-⍺-GAL4; UAS>stop>GFP.Myr/UAS-TraF; fruFLP/tub>GAL80>	F	M 0/18; X 4/18; F 14/18	P 5/19; A 14/19; 0 neuron 2/19; 1 neuron 11/19; 2 neuron 6/19	0 neuron 11/19; 1 neuron 6/19; 2 neuron 2/19	A 16/19; P 3/19	M 0/19	M 1/19; X 1/19; F 17/19	M 1/18; F 17/18	mAL 1/18
DIP-⍺-GAL4; UAS>stop>GFP.Myr/UAS-FruMA; fruFLP/tub>GAL80>	M	M 0/18; X 18/18; F 0/18	P 0/17; A 17/17; 0 neuron 17/17	0 neuron 17/17	A 17/17; P 0/17	M 0/17	M 1/17; X 16/17; F 0/17	M 17/17; F 0/17	mAL 0/17
DIP-⍺-GAL4; UAS>stop>GFP.Myr/UAS-FruMA; fruFLP/tub>GAL80>	F	M 1/15; X 13/15; F 1/15	P 3/18; A 15/18; 0 neuron 7/18; 1 neuron 10/18; 2 neuron 1/18	0 neuron 18/19; 1 neuron 1/19	A 19/19; P 0/19	M 0/19	M 0/19 ; X 6/19; F 13/19	M 7/18; F 11/18	mAL 0/18
DIP-⍺-GAL4; UAS>stop>GFP.Myr/UAS-FruMB; fruFLP/tub>GAL80>	M	M 8/15; X 7/15; F 0/15	P 2/16; A 14/16; 0 neuron 14/16; 1 neuron 2/16	0 neuron 15/16; 1 neuron 1/16	A 16/16; P 0/16	M 11/16	M 13/16; X 3/16; F 0/16	M 15/16; F 1/16	mAL 0/16
DIP-⍺-GAL4; UAS>stop>GFP.Myr/UAS-FruMB; fruFLP/tub>GAL80>	F	M 0/15; X 3/15; F 12/15	P 4/23; A 19/23; 0 neuron 2/23; 1 neuron 11/23; 2 neuron 10/23	0 neuron 12/23; 1 neuron 8/23; 2 neuron 3/23	A 15/23; P 8/23	M 0/23	M 1/23; X 0/23; F 22/23	M 0/23; F 23/23	mAL 2/23
DIP-⍺-GAL4; UAS>stop>GFP.Myr/UAS-FruMC; fruFLP/tub>GAL80>	M	M 4/16; X 12/16; F 0/16	P 3/17; A 14/17; 0 neuron 17/17	0 neuron 17/17	A 17/17; P 0/17	M 0/17	M 1/17; X 16/17; F 0/17	M 17/17; F 0/17	mAL 2/17
DIP-⍺-GAL4; UAS>stop>GFP.Myr/UAS-FruMC; fruFLP/tub>GAL80>	F	M 0/16; X 4/16; F 12/16	P 6/19; A 13/19; 0 neuron 5/19; 1 neuron 11/19; 2 neuron 3/19	0 neuron 17/19; 1 neuron 2/19	A 18/19; P 1/19	M 0/19	M 1/19; X 13/19; F 5/19	M 4/19; F 15/19	mAL 3/19
*** fraction: (number of samples with described pattern) / (total number of samples scored)
The next tab: the corresponding Scoring Raw Data

## Sheet: 4B. Scoring Raw Data
with tubGal80
In the scoring raw data sheet: Each letter (like "M", "F", "X", "U", etc.) is the abbreviations of a specific pattern in different VNC or brain regions (check the details shown in red); Each number represents how many described projection patterns or neuron bodies scored in each tissue sample.
Control			Projection pattern in AbG of VNC	U shaped projection pattern & number of neuron body in SEG	Lateral assending projection in VLP	Square shaped projection pattern in VLP	M shaped projection pattern above AL in the Medial Part of Midbrain	Horizontal projection in the Medial Part of Midbrain	Protocerebral projection in SMP	mAL neuron		Lab Internal Notation
Genotype	Sex	Sample	Male-Like Pattern (M) vs No signal (X) vs Female-Like Pattern (F)	Presence of U shaped pattern (U), Absense of signal (X); Number (#) of neuron bodies	Number (#) of lateral assending projections	Absense (A) vs Presence (P) of Square shaped pattern, Number (#) of the corresponding neuron bodies	Presence of M shaped projection pattern (YES/NO)	Male-Like Pattern (M) vs No signal (X) vs Female-Like Pattern (F)	Male-Like Pattern (M) vs Female-Like Pattern (F)	Number (#) of mAL neurons		File Name	Blind Number
DIP-⍺-GAL4; UAS>stop>GFP.Myr/+; fruFLP/tub>GAL80>	Male	VNC	M									7d_Male_1_VNC_DIP⍺_55810_tubGAL80_fruFLP_gfp488_nc82633	B3-A5
DIP-⍺-GAL4; UAS>stop>GFP.Myr/+; fruFLP/tub>GAL80>	Male	VNC	M									7d_Male_2_VNC_DIP⍺_55810_tubGAL80_fruFLP_gfp488_nc82633	B3-D8
DIP-⍺-GAL4; UAS>stop>GFP.Myr/+; fruFLP/tub>GAL80>	Male	VNC	M									7d_Male_10_VNC_DIP⍺_55810_tubGAL80_fruFLP_gfp488_nc82633	B3-O7
DIP-⍺-GAL4; UAS>stop>GFP.Myr/+; fruFLP/tub>GAL80>	Male	VNC	M									7d_Male_13_VNC_DIP⍺_55810_tubGAL80_fruFLP_gfp488_nc82633	B3-U7
DIP-⍺-GAL4; UAS>stop>GFP.Myr/+; fruFLP/tub>GAL80>	Male	VNC	M									7d_Male_5_VNC_DIP⍺_55810_tubGAL80_fruFLP_gfp488_nc82633	B4-A4
DIP-⍺-GAL4; UAS>stop>GFP.Myr/+; fruFLP/tub>GAL80>	Male	VNC	M									7d_Male_6_VNC_DIP⍺_55810_tubGAL80_fruFLP_gfp488_nc82633	B4-E3
DIP-⍺-GAL4; UAS>stop>GFP.Myr/+; fruFLP/tub>GAL80>	Male	VNC	M									7d_Male_12_VNC_DIP⍺_55810_tubGAL80_fruFLP_gfp488_nc82633	B4-E7
DIP-⍺-GAL4; UAS>stop>GFP.Myr/+; fruFLP/tub>GAL80>	Male	VNC	M									7d_Male_7_VNC_DIP⍺_55810_tubGAL80_fruFLP_gfp488_nc82633	B4-F4
DIP-⍺-GAL4; UAS>stop>GFP.Myr/+; fruFLP/tub>GAL80>	Male	VNC	M									7d_Male_9_VNC_DIP⍺_55810_tubGAL80_fruFLP_gfp488_nc82633	B4-M2
DIP-⍺-GAL4; UAS>stop>GFP.Myr/+; fruFLP/tub>GAL80>	Male	VNC	X									7d_Male_14_VNC_DIP⍺_55810_tubGAL80_fruFLP_gfp488_nc82633	B3-A7
DIP-⍺-GAL4; UAS>stop>GFP.Myr/+; fruFLP/tub>GAL80>	Male	VNC	X									7d_Male_8_VNC_DIP⍺_55810_tubGAL80_fruFLP_gfp488_nc82633	B3-B5
DIP-⍺-GAL4; UAS>stop>GFP.Myr/+; fruFLP/tub>GAL80>	Male	VNC	X									7d_Male_16_VNC_DIP⍺_55810_tubGAL80_fruFLP_gfp488_nc82633	B3-E6
DIP-⍺-GAL4; UAS>stop>GFP.Myr/+; fruFLP/tub>GAL80>	Male	VNC	X									7d_Male_11_VNC_DIP⍺_55810_tubGAL80_fruFLP_gfp488_nc82633	B3-E9
DIP-⍺-GAL4; UAS>stop>GFP.Myr/+; fruFLP/tub>GAL80>	Male	VNC	X									7d_Male_4_VNC_DIP⍺_55810_tubGAL80_fruFLP_gfp488_nc82633	B3-S8
DIP-⍺-GAL4; UAS>stop>GFP.Myr/+; fruFLP/tub>GAL80>	Male	VNC	X									7d_Male_15_VNC_DIP⍺_55810_tubGAL80_fruFLP_gfp488_nc82633	B4-D9
DIP-⍺-GAL4; UAS>stop>GFP.Myr/+; fruFLP/tub>GAL80>	Male	VNC	X									7d_Male_3_VNC_DIP⍺_55810_tubGAL80_fruFLP_gfp488_nc82633	B4-H6
DIP-⍺-GAL4; UAS>stop>GFP.Myr/+; fruFLP/tub>GAL80>	Female	VNC	F									7d_Female_10_VNC_DIP⍺_55810_tubGAL80_fruFLP_gfp488_nc82633	B3-E4
DIP-⍺-GAL4; UAS>stop>GFP.Myr/+; fruFLP/tub>GAL80>	Female	VNC	F									7d_Female_4_VNC_DIP⍺_55810_tubGAL80_fruFLP_gfp488_nc82633	B3-J6
DIP-⍺-GAL4; UAS>stop>GFP.Myr/+; fruFLP/tub>GAL80>	Female	VNC	F									7d_Female_2_VNC_DIP⍺_55810_tubGAL80_fruFLP_gfp488_nc82633	B3-K7
DIP-⍺-GAL4; UAS>stop>GFP.Myr/+; fruFLP/tub>GAL80>	Female	VNC	F									7d_Female_5_VNC_DIP⍺_55810_tubGAL80_fruFLP_gfp488_nc82633	B3-M6
DIP-⍺-GAL4; UAS>stop>GFP.Myr/+; fruFLP/tub>GAL80>	Female	VNC	F									7d_Female_11_VNC_DIP⍺_55810_tubGAL80_fruFLP_gfp488_nc82633	B3-O1
DIP-⍺-GAL4; UAS>stop>GFP.Myr/+; fruFLP/tub>GAL80>	Female	VNC	F									7d_Female_8_VNC_DIP⍺_55810_tubGAL80_fruFLP_gfp488_nc82633	B3-Q4
DIP-⍺-GAL4; UAS>stop>GFP.Myr/+; fruFLP/tub>GAL80>	Female	VNC	F									7d_Female_1_VNC_DIP⍺_55810_tubGAL80_fruFLP_gfp488_nc82633	B3-T6
DIP-⍺-GAL4; UAS>stop>GFP.Myr/+; fruFLP/tub>GAL80>	Female	VNC	F									7d_Female_13_VNC_DIP⍺_55810_tubGAL80_fruFLP_gfp488_nc82633	B3-T9
DIP-⍺-GAL4; UAS>stop>GFP.Myr/+; fruFLP/tub>GAL80>	Female	VNC	F									7d_Female_15_VNC_DIP⍺_55810_tubGAL80_fruFLP_gfp488_nc82633	B3-W1
DIP-⍺-GAL4; UAS>stop>GFP.Myr/+; fruFLP/tub>GAL80>	Female	VNC	F									7d_Female_14_VNC_DIP⍺_55810_tubGAL80_fruFLP_gfp488_nc82633	B3-Y8
DIP-⍺-GAL4; UAS>stop>GFP.Myr/+; fruFLP/tub>GAL80>	Female	VNC	F									7d_Female_6_VNC_DIP⍺_55810_tubGAL80_fruFLP_gfp488_nc82633	B4-B8
DIP-⍺-GAL4; UAS>stop>GFP.Myr/+; fruFLP/tub>GAL80>	Female	VNC	F									7d_Female_17_VNC_DIP⍺_55810_tubGAL80_fruFLP_gfp488_nc82633	B4-C7
DIP-⍺-GAL4; UAS>stop>GFP.Myr/+; fruFLP/tub>GAL80>	Female	VNC	F									7d_Female_12_VNC_DIP⍺_55810_tubGAL80_fruFLP_gfp488_nc82633	B4-D4
DIP-⍺-GAL4; UAS>stop>GFP.Myr/+; fruFLP/tub>GAL80>	Female	VNC	F									7d_Female_18_VNC_DIP⍺_55810_tubGAL80_fruFLP_gfp488_nc82633	B4-H1
DIP-⍺-GAL4; UAS>stop>GFP.Myr/+; fruFLP/tub>GAL80>	Female	VNC	N.A.									7d_Female_3_VNC_DIP⍺_55810_tubGAL80_fruFLP_gfp488_nc82633	B4-G4
DIP-⍺-GAL4; UAS>stop>GFP.Myr/+; fruFLP/tub>GAL80>	Female	VNC	X									7d_Female_9_VNC_DIP⍺_55810_tubGAL80_fruFLP_gfp488_nc82633	B3-K6
DIP-⍺-GAL4; UAS>stop>GFP.Myr/+; fruFLP/tub>GAL80>	Female	VNC	X									7d_Female_7_VNC_DIP⍺_55810_tubGAL80_fruFLP_gfp488_nc82633	B3-Y3
DIP-⍺-GAL4; UAS>stop>GFP.Myr/+; fruFLP/tub>GAL80>	Female	VNC	X									7d_Female_16_VNC_DIP⍺_55810_tubGAL80_fruFLP_gfp488_nc82633	B4-L7
DIP-⍺-GAL4; UAS>stop>GFP.Myr/+; fruFLP/tub>GAL80>	Male	Brain		X, No U, 0	0	A	N	M	M	0		7d_Male_13_DIP⍺_55810_tubGAL80_fruFLP_gfp488_nc82633	B3-D4
DIP-⍺-GAL4; UAS>stop>GFP.Myr/+; fruFLP/tub>GAL80>	Male	Brain		X, No U, 1	0	A	Y	M	M	1		6d_Male_4_DIP⍺_55810_tubGAL80_fruFLP_gfp488_nc82633	B3-E1
DIP-⍺-GAL4; UAS>stop>GFP.Myr/+; fruFLP/tub>GAL80>	Male	Brain		X, 0	0	A	Y	M	M	0		7d_Male_11_DIP⍺_55810_tubGAL80_fruFLP_gfp488_nc82633	B3-F4
DIP-⍺-GAL4; UAS>stop>GFP.Myr/+; fruFLP/tub>GAL80>	Male	Brain		X, No U, 0	0	A	Y	M	M	0		7d_Male_15_DIP⍺_55810_tubGAL80_fruFLP_gfp488_nc82633	B3-H4
DIP-⍺-GAL4; UAS>stop>GFP.Myr/+; fruFLP/tub>GAL80>	Male	Brain		X, 0	0	A	N	M	M	0		6d_Male_2_DIP⍺_55810_tubGAL80_fruFLP_gfp488_nc82633	B3-I5
DIP-⍺-GAL4; UAS>stop>GFP.Myr/+; fruFLP/tub>GAL80>	Male	Brain		X, No U, 0	0	A	Y	M	M	0		6d_Male_6_DIP⍺_55810_tubGAL80_fruFLP_gfp488_nc82633	B3-J4
DIP-⍺-GAL4; UAS>stop>GFP.Myr/+; fruFLP/tub>GAL80>	Male	Brain		X, No U, 0	0	A	Y	M	M	0		6d_Male_3_DIP⍺_55810_tubGAL80_fruFLP_gfp488_nc82633	B3-K2
DIP-⍺-GAL4; UAS>stop>GFP.Myr/+; fruFLP/tub>GAL80>	Male	Brain		U, 0	0	A	N	X	M	0		7d_Male_14_DIP⍺_55810_tubGAL80_fruFLP_gfp488_nc82633	B3-K3
DIP-⍺-GAL4; UAS>stop>GFP.Myr/+; fruFLP/tub>GAL80>	Male	Brain		X, No U, 0	0	A	N	M	M	0		7d_Male_9_DIP⍺_55810_tubGAL80_fruFLP_gfp488_nc82633	B3-K9
DIP-⍺-GAL4; UAS>stop>GFP.Myr/+; fruFLP/tub>GAL80>	Male	Brain		X, No U, 0	0	A	Y	M	M	0		7d_Male_10_DIP⍺_55810_tubGAL80_fruFLP_gfp488_nc82633	B3-R5
DIP-⍺-GAL4; UAS>stop>GFP.Myr/+; fruFLP/tub>GAL80>	Male	Brain		U, 0	0	A	Y	M	M	0		6d_Male_7_DIP⍺_55810_tubGAL80_fruFLP_gfp488_nc82633	B3-S4
DIP-⍺-GAL4; UAS>stop>GFP.Myr/+; fruFLP/tub>GAL80>	Male	Brain		U, 0	1	A	N	M	F	0		7d_Male_8_DIP⍺_55810_tubGAL80_fruFLP_gfp488_nc82633	B3-V3
DIP-⍺-GAL4; UAS>stop>GFP.Myr/+; fruFLP/tub>GAL80>	Male	Brain		X, No U, 0	0	A	Y	M	M	0		7d_Male_12_DIP⍺_55810_tubGAL80_fruFLP_gfp488_nc82633	B4-D8
DIP-⍺-GAL4; UAS>stop>GFP.Myr/+; fruFLP/tub>GAL80>	Male	Brain		X, No U, 0	0	A	Y	M	M	0		6d_Male_1_DIP⍺_55810_tubGAL80_fruFLP_gfp488_nc82633	B4-I6
DIP-⍺-GAL4; UAS>stop>GFP.Myr/+; fruFLP/tub>GAL80>	Male	Brain		X, No U, 0	0	A	N	M	M	0		6d_Male_5_DIP⍺_55810_tubGAL80_fruFLP_gfp488_nc82633	B4-L3
DIP-⍺-GAL4; UAS>stop>GFP.Myr/+; fruFLP/tub>GAL80>	Female	Brain		X, No U, 1	0	A	N	F	F	0		7d_Female_4_DIP⍺_55810_tubGAL80_fruFLP_gfp488_nc82633	B3-A6
DIP-⍺-GAL4; UAS>stop>GFP.Myr/+; fruFLP/tub>GAL80>	Female	Brain		U, 1	0	P, 0	Y	F	F	0		7d_Female_11_DIP⍺_55810_tubGAL80_fruFLP_gfp488_nc82633	B3-F1
DIP-⍺-GAL4; UAS>stop>GFP.Myr/+; fruFLP/tub>GAL80>	Female	Brain		X, No U , 2	0	A	N	F	F	0		7d_Female_13_DIP⍺_55810_tubGAL80_fruFLP_gfp488_nc82633	B3-L7
DIP-⍺-GAL4; UAS>stop>GFP.Myr/+; fruFLP/tub>GAL80>	Female	Brain		X, No U, 0	0	A	N	F	F	0		7d_Female_15_DIP⍺_55810_tubGAL80_fruFLP_gfp488_nc82633	B3-O8
DIP-⍺-GAL4; UAS>stop>GFP.Myr/+; fruFLP/tub>GAL80>	Female	Brain		X, No U, 1	0	A	N	F	F	0		6d_Female_1_DIP⍺_55810_tubGAL80_fruFLP_gfp488_nc82633	B3-Q9
DIP-⍺-GAL4; UAS>stop>GFP.Myr/+; fruFLP/tub>GAL80>	Female	Brain		X, No U , 2	0	A	N	F	F	0		7d_Female_7_DIP⍺_55810_tubGAL80_fruFLP_gfp488_nc82633	B3-R8
DIP-⍺-GAL4; UAS>stop>GFP.Myr/+; fruFLP/tub>GAL80>	Female	Brain		X, No U, 0	0	A	N	F	F	0		7d_Female_10_DIP⍺_55810_tubGAL80_fruFLP_gfp488_nc82633	B3-U6
DIP-⍺-GAL4; UAS>stop>GFP.Myr/+; fruFLP/tub>GAL80>	Female	Brain		X, No U , 2	0	A	N	F	F	0		6d_Female_2_DIP⍺_55810_tubGAL80_fruFLP_gfp488_nc82633	B3-V5
DIP-⍺-GAL4; UAS>stop>GFP.Myr/+; fruFLP/tub>GAL80>	Female	Brain		X, No U , 1	0	A	N	F	F	1		7d_Female_6_DIP⍺_55810_tubGAL80_fruFLP_gfp488_nc82633	B4-A2
DIP-⍺-GAL4; UAS>stop>GFP.Myr/+; fruFLP/tub>GAL80>	Female	Brain		X, No U, 2	0	A	N	F	F	0		6d_Female_3_DIP⍺_55810_tubGAL80_fruFLP_gfp488_nc82633	B4-D6
DIP-⍺-GAL4; UAS>stop>GFP.Myr/+; fruFLP/tub>GAL80>	Female	Brain		X, No U, 1	0	P, 0	N	F	F	0		7d_Female_12_DIP⍺_55810_tubGAL80_fruFLP_gfp488_nc82633	B4-G3
DIP-⍺-GAL4; UAS>stop>GFP.Myr/+; fruFLP/tub>GAL80>	Female	Brain		X, No U , 1	0	A	N	F	F	0		7d_Female_14_DIP⍺_55810_tubGAL80_fruFLP_gfp488_nc82633	B4-G7
DIP-⍺-GAL4; UAS>stop>GFP.Myr/+; fruFLP/tub>GAL80>	Female	Brain		X, No U, 1	0	A	N	F	F	0		7d_Female_5_DIP⍺_55810_tubGAL80_fruFLP_gfp488_nc82633	B4-I8
DIP-⍺-GAL4; UAS>stop>GFP.Myr/+; fruFLP/tub>GAL80>	Female	Brain		X, No U, 1	0	A	N	F	F	0		7d_Female_9_DIP⍺_55810_tubGAL80_fruFLP_gfp488_nc82633	B4-K5
DIP-⍺-GAL4; UAS>stop>GFP.Myr/+; fruFLP/tub>GAL80>	Female	Brain		X, No U , 2	0	A	N	F	F	0		7d_Female_8_DIP⍺_55810_tubGAL80_fruFLP_gfp488_nc82633	B4-M7
Ex1			Projection pattern in AbG of VNC	U shaped projection pattern & number of neuron body in SEG	Lateral assending projection in VLP	Square shaped projection pattern in VLP	M shaped projection pattern above AL in the Medial Part of Midbrain	Horizontal projection in the Medial Part of Midbrain	Protocerebral projection in SMP	mAL neuron
Genotype	Sex	Sample	Male-Like Pattern (M) vs No signal (X) vs Female-Like Pattern (F)	Presence of U shaped pattern (U), Absense of signal (X); Number (#) of neuron body	Number (#) of lateral assending projection	Absense (A) vs Presence (P) of Square shaped pattern, Number (#) of the corresponding neuron body	Presence of M shaped projection pattern (YES/NO)	Male-Like Pattern (M) vs No signal (X) vs Female-Like Pattern (F)	Male-Like Pattern (M) vs Female-Like Pattern (F)	Number (#) of mAL neuron		File Name	Blind Number
DIP-⍺-GAL4; UAS>stop>GFP.Myr/UAS-TraF; fruFLP/tub>GAL80>	Male	VNC	F									6d_Male_15_vnc_⍺_55810_tubGAL80_TraF_fruFLP_gfp488_FruM546	B3-F3
DIP-⍺-GAL4; UAS>stop>GFP.Myr/UAS-TraF; fruFLP/tub>GAL80>	Male	VNC	F									6d_Male_13_vnc_⍺_55810_tubGAL80_TraF_fruFLP_gfp488_FruM546	B3-L3
DIP-⍺-GAL4; UAS>stop>GFP.Myr/UAS-TraF; fruFLP/tub>GAL80>	Male	VNC	F									6d_Male_18_vnc_⍺_55810_tubGAL80_TraF_fruFLP_gfp488_FruM546	B3-P6
DIP-⍺-GAL4; UAS>stop>GFP.Myr/UAS-TraF; fruFLP/tub>GAL80>	Male	VNC	F									5d_Male_8_vnc_⍺_55810_tubGAL80_TraF_fruFLP_gfp488_FruM546	B3-R1
DIP-⍺-GAL4; UAS>stop>GFP.Myr/UAS-TraF; fruFLP/tub>GAL80>	Male	VNC	F									7d_Male_3_vnc_⍺_55810_tubGAL80_TraF_fruFLP_gfp488_FruM546	B3-Z3
DIP-⍺-GAL4; UAS>stop>GFP.Myr/UAS-TraF; fruFLP/tub>GAL80>	Male	VNC	F									6d_Male_17_vnc_⍺_55810_tubGAL80_TraF_fruFLP_gfp488_FruM546	B4-F5
DIP-⍺-GAL4; UAS>stop>GFP.Myr/UAS-TraF; fruFLP/tub>GAL80>	Male	VNC	M									5d_Male_1_vnc_⍺_55810_tubGAL80_TraF_fruFLP_gfp488_FruM546	B3-R4
DIP-⍺-GAL4; UAS>stop>GFP.Myr/UAS-TraF; fruFLP/tub>GAL80>	Male	VNC	M									6d_Male_16_vnc_⍺_55810_tubGAL80_TraF_fruFLP_gfp488_FruM546	B4-M4
DIP-⍺-GAL4; UAS>stop>GFP.Myr/UAS-TraF; fruFLP/tub>GAL80>	Male	VNC	X									5d_Male_7_vnc_⍺_55810_tubGAL80_TraF_fruFLP_gfp488_FruM546	B3-C5
DIP-⍺-GAL4; UAS>stop>GFP.Myr/UAS-TraF; fruFLP/tub>GAL80>	Male	VNC	X									5d_Male_6_vnc_⍺_55810_tubGAL80_TraF_fruFLP_gfp488_FruM546	B3-D7
DIP-⍺-GAL4; UAS>stop>GFP.Myr/UAS-TraF; fruFLP/tub>GAL80>	Male	VNC	X									6d_Male_12_vnc_⍺_55810_tubGAL80_TraF_fruFLP_gfp488_FruM546	B3-Q3
DIP-⍺-GAL4; UAS>stop>GFP.Myr/UAS-TraF; fruFLP/tub>GAL80>	Male	VNC	X									6d_Male_14_vnc_⍺_55810_tubGAL80_TraF_fruFLP_gfp488_FruM546	B3-R2
DIP-⍺-GAL4; UAS>stop>GFP.Myr/UAS-TraF; fruFLP/tub>GAL80>	Male	VNC	X									7d_Male_4_vnc_⍺_55810_tubGAL80_TraF_fruFLP_gfp488_FruM546	B3-X4
DIP-⍺-GAL4; UAS>stop>GFP.Myr/UAS-TraF; fruFLP/tub>GAL80>	Male	VNC	X									6d_Male_11_vnc_⍺_55810_tubGAL80_TraF_fruFLP_gfp488_FruM546	B3-Z8
DIP-⍺-GAL4; UAS>stop>GFP.Myr/UAS-TraF; fruFLP/tub>GAL80>	Male	VNC	X									6d_Male_10_vnc_⍺_55810_tubGAL80_TraF_fruFLP_gfp488_FruM546	B4-A6
DIP-⍺-GAL4; UAS>stop>GFP.Myr/UAS-TraF; fruFLP/tub>GAL80>	Male	VNC	X									7d_Male_2_vnc_⍺_55810_tubGAL80_TraF_fruFLP_gfp488_FruM546	B4-E5
DIP-⍺-GAL4; UAS>stop>GFP.Myr/UAS-TraF; fruFLP/tub>GAL80>	Male	VNC	X									6d_Male_9_vnc_⍺_55810_tubGAL80_TraF_fruFLP_gfp488_FruM546	B4-J7
DIP-⍺-GAL4; UAS>stop>GFP.Myr/UAS-TraF; fruFLP/tub>GAL80>	Male	VNC	X									5d_Male_5_vnc_⍺_55810_tubGAL80_TraF_fruFLP_gfp488_FruM546	B4-L5
DIP-⍺-GAL4; UAS>stop>GFP.Myr/UAS-TraF; fruFLP/tub>GAL80>	Female	VNC	F									6d_Female_VNC_22_DIP⍺_55810_tubGAL80_TraF_fruFLP_gfp488__nc82633.czi	B3-Z2
DIP-⍺-GAL4; UAS>stop>GFP.Myr/UAS-TraF; fruFLP/tub>GAL80>	Female	VNC	F									6d_Female_VNC_20_DIP⍺_55810_tubGAL80_TraF_fruFLP_gfp488__nc82633.czi	B4-D1
DIP-⍺-GAL4; UAS>stop>GFP.Myr/UAS-TraF; fruFLP/tub>GAL80>	Female	VNC	F									6d_Female_VNC_24_DIP⍺_55810_tubGAL80_TraF_fruFLP_gfp488__nc82633.czi	B4-G2
DIP-⍺-GAL4; UAS>stop>GFP.Myr/UAS-TraF; fruFLP/tub>GAL80>	Female	VNC	F									5d_Female_VNC_10_DIP⍺_55810_tubGAL80_TraF_fruFLP_gfp488__nc82633	B3-F8
DIP-⍺-GAL4; UAS>stop>GFP.Myr/UAS-TraF; fruFLP/tub>GAL80>	Female	VNC	F									6d_Female_VNC_17_DIP⍺_55810_tubGAL80_TraF_fruFLP_gfp488__nc82633	B3-G3
DIP-⍺-GAL4; UAS>stop>GFP.Myr/UAS-TraF; fruFLP/tub>GAL80>	Female	VNC	F									5d_Female_VNC_5_DIP⍺_55810_tubGAL80_TraF_fruFLP_gfp488__nc82633	B3-J9
DIP-⍺-GAL4; UAS>stop>GFP.Myr/UAS-TraF; fruFLP/tub>GAL80>	Female	VNC	F									6d_Female_VNC_21_DIP⍺_55810_tubGAL80_TraF_fruFLP_gfp488__nc82633.czi	B3-M1
DIP-⍺-GAL4; UAS>stop>GFP.Myr/UAS-TraF; fruFLP/tub>GAL80>	Female	VNC	F									5d_Female_VNC_6_DIP⍺_55810_tubGAL80_TraF_fruFLP_gfp488__nc82633	B3-T3
DIP-⍺-GAL4; UAS>stop>GFP.Myr/UAS-TraF; fruFLP/tub>GAL80>	Female	VNC	F									5d_Female_VNC_13_DIP⍺_55810_tubGAL80_TraF_fruFLP_gfp488__nc82633	B3-U1
DIP-⍺-GAL4; UAS>stop>GFP.Myr/UAS-TraF; fruFLP/tub>GAL80>	Female	VNC	F									6d_Female_VNC_23_DIP⍺_55810_tubGAL80_TraF_fruFLP_gfp488__nc82633.czi	B3-U2
DIP-⍺-GAL4; UAS>stop>GFP.Myr/UAS-TraF; fruFLP/tub>GAL80>	Female	VNC	F									5d_Female_VNC_16_DIP⍺_55810_tubGAL80_TraF_fruFLP_gfp488__nc82633	B4-J3
DIP-⍺-GAL4; UAS>stop>GFP.Myr/UAS-TraF; fruFLP/tub>GAL80>	Female	VNC	F									5d_Female_VNC_15_DIP⍺_55810_tubGAL80_TraF_fruFLP_gfp488__nc82633	B4-B2
DIP-⍺-GAL4; UAS>stop>GFP.Myr/UAS-TraF; fruFLP/tub>GAL80>	Female	VNC	F									5d_Female_VNC_8_DIP⍺_55810_tubGAL80_TraF_fruFLP_gfp488__nc82633	B4-H5
DIP-⍺-GAL4; UAS>stop>GFP.Myr/UAS-TraF; fruFLP/tub>GAL80>	Female	VNC	F									6d_Female_VNC_18_DIP⍺_55810_tubGAL80_TraF_fruFLP_gfp488__nc82633	B4-I3
DIP-⍺-GAL4; UAS>stop>GFP.Myr/UAS-TraF; fruFLP/tub>GAL80>	Female	VNC	N.A.									5d_Female_VNC_4_DIP⍺_55810_tubGAL80_TraF_fruFLP_gfp488__nc82633	B4-J1
DIP-⍺-GAL4; UAS>stop>GFP.Myr/UAS-TraF; fruFLP/tub>GAL80>	Female	VNC	X									5d_Female_VNC_3_DIP⍺_55810_tubGAL80_TraF_fruFLP_gfp488__nc82633	B3-X8
DIP-⍺-GAL4; UAS>stop>GFP.Myr/UAS-TraF; fruFLP/tub>GAL80>	Female	VNC	X									5d_Female_VNC_9_DIP⍺_55810_tubGAL80_TraF_fruFLP_gfp488__nc82633	B4-D2
DIP-⍺-GAL4; UAS>stop>GFP.Myr/UAS-TraF; fruFLP/tub>GAL80>	Female	VNC	X									6d_Female_VNC_19_DIP⍺_55810_tubGAL80_TraF_fruFLP_gfp488__nc82633.czi	B3-M9
DIP-⍺-GAL4; UAS>stop>GFP.Myr/UAS-TraF; fruFLP/tub>GAL80>	Female	VNC	X									5d_Female_VNC_12_DIP⍺_55810_tubGAL80_TraF_fruFLP_gfp488__nc82633	B3-Z6
DIP-⍺-GAL4; UAS>stop>GFP.Myr/UAS-TraF; fruFLP/tub>GAL80>	Male	Brain		U, 0	0	P, 2	Y	M	F	0		7d_Male_4_DIP⍺_55810_tubGAL80_TraF_fruFLP_gfp488_FruM568_nc82633_02112019	B3-A2
DIP-⍺-GAL4; UAS>stop>GFP.Myr/UAS-TraF; fruFLP/tub>GAL80>	Male	Brain		X, No U, 0	0	A	Y	F	N.A.	N.A.		7d_Male_9_DIP⍺_55810_tubGAL80_TraF_fruFLP_gfp488_nc82633_10222019	B3-F7
DIP-⍺-GAL4; UAS>stop>GFP.Myr/UAS-TraF; fruFLP/tub>GAL80>	Male	Brain		U, 1	2	A	N	M	M	0		7d_Male_12_DIP⍺_55810_tubGAL80_TraF_fruFLP_gfp488_FruM568_nc82633_02112019	B3-O9
DIP-⍺-GAL4; UAS>stop>GFP.Myr/UAS-TraF; fruFLP/tub>GAL80>	Male	Brain		X, No U, 0	1	A	Y	M	M	0		7d_Male_10_DIP⍺_55810_tubGAL80_TraF_fruFLP_gfp488_nc82633_10222019	B3-Q5
DIP-⍺-GAL4; UAS>stop>GFP.Myr/UAS-TraF; fruFLP/tub>GAL80>	Male	Brain		X, No U , 1	1	A	Y	M	M	0		7d_Male_6_DIP⍺_55810_tubGAL80_TraF_fruFLP_gfp488_FruM568_nc82633_02112019	B3-T4
DIP-⍺-GAL4; UAS>stop>GFP.Myr/UAS-TraF; fruFLP/tub>GAL80>	Male	Brain		X, No U, 0	1	A	Y	M	M	0		6d_Male_2_DIP⍺_55810_tubGAL80_TraF_fruFLP_gfp488_FruM568_nc82633_02112019	B3-V2
DIP-⍺-GAL4; UAS>stop>GFP.Myr/UAS-TraF; fruFLP/tub>GAL80>	Male	Brain		X, No U, 0	1	A	Y	M	M	0		5d_Male_16_DIP⍺_55810_tubGAL80_TraF_fruFLP_gfp488_nc82633_10222019	B3-V6
DIP-⍺-GAL4; UAS>stop>GFP.Myr/UAS-TraF; fruFLP/tub>GAL80>	Male	Brain		X, No U, 0	1	A	Y	M	M	0		6d_Male_19_DIP⍺_55810_tubGAL80_TraF_fruFLP_gfp488_nc82633_10292019	B4-C5
DIP-⍺-GAL4; UAS>stop>GFP.Myr/UAS-TraF; fruFLP/tub>GAL80>	Male	Brain		U, 0	2	A	Y	M	F	0		6d_Male_17_DIP⍺_55810_tubGAL80_TraF_fruFLP_gfp488_nc82633_10292019	B4-C6
DIP-⍺-GAL4; UAS>stop>GFP.Myr/UAS-TraF; fruFLP/tub>GAL80>	Male	Brain		X, No U, 0	2	A	N	M	M	0		7d_Male_7_DIP⍺_55810_tubGAL80_TraF_fruFLP_gfp488_nc82633_10222019	B4-C8
DIP-⍺-GAL4; UAS>stop>GFP.Myr/UAS-TraF; fruFLP/tub>GAL80>	Male	Brain		X, No U, 0	2	P, 1	Y	M	M	0		5d_Male_13_DIP⍺_55810_tubGAL80_TraF_fruFLP_gfp488_nc82633_10222019	B4-F7
DIP-⍺-GAL4; UAS>stop>GFP.Myr/UAS-TraF; fruFLP/tub>GAL80>	Male	Brain		U, 1	2	A	N	M	M	0		7d_Male_5_DIP⍺_55810_tubGAL80_TraF_fruFLP_gfp488_FruM568_nc82633_02112019	B4-I2
DIP-⍺-GAL4; UAS>stop>GFP.Myr/UAS-TraF; fruFLP/tub>GAL80>	Male	Brain		X, No U, 0	1	A	Y	M	F	0		6d_Male_18_DIP⍺_55810_tubGAL80_TraF_fruFLP_gfp488_nc82633_10292019	B4-K4
DIP-⍺-GAL4; UAS>stop>GFP.Myr/UAS-TraF; fruFLP/tub>GAL80>	Male	Brain		X, No U, 0	1	A	Y	M	M	0		7d_Male_8_DIP⍺_55810_tubGAL80_TraF_fruFLP_gfp488_nc82633_10222019	B4-K8
DIP-⍺-GAL4; UAS>stop>GFP.Myr/UAS-TraF; fruFLP/tub>GAL80>	Male	Brain		U, 0	2	P, 1	N	M	M	0		5d_Male_15_DIP⍺_55810_tubGAL80_TraF_fruFLP_gfp488_nc82633_10222019	B4-M3
DIP-⍺-GAL4; UAS>stop>GFP.Myr/UAS-TraF; fruFLP/tub>GAL80>	Male	Brain		N.A, 0	2	A	N	M	F	0		5d_Male_14_DIP⍺_55810_tubGAL80_TraF_fruFLP_gfp488_nc82633_10222019	B3-Z1
DIP-⍺-GAL4; UAS>stop>GFP.Myr/UAS-TraF; fruFLP/tub>GAL80>	Male	Brain		X, No U, 0	1	A	Y	M	F	0		5d_Male_11_DIP⍺_55810_tubGAL80_TraF_fruFLP_gfp488_nc82633_10222019	B3-Z7
DIP-⍺-GAL4; UAS>stop>GFP.Myr/UAS-TraF; fruFLP/tub>GAL80>	Male	Brain		U, 0	2	A	Y	M	M	0		6d_Male_1_DIP⍺_55810_tubGAL80_TraF_fruFLP_gfp488_FruM568_nc82633_02112019	B4-A8
DIP-⍺-GAL4; UAS>stop>GFP.Myr/UAS-TraF; fruFLP/tub>GAL80>	Male	Brain		U, 0	1	A	Y	M	M	0		6d_Male_3_DIP⍺_55810_tubGAL80_TraF_fruFLP_gfp488_FruM568_nc82633_02112019	B4-C2
DIP-⍺-GAL4; UAS>stop>GFP.Myr/UAS-TraF; fruFLP/tub>GAL80>	Female	Brain		X, No U, 1	0	A	N	F	M	0		7d_Female_8_DIP⍺_55810_tubGAL80_TraF_fruFLP_gfp488_nc82633	B3-B3
DIP-⍺-GAL4; UAS>stop>GFP.Myr/UAS-TraF; fruFLP/tub>GAL80>	Female	Brain		X, No U, 0	1	P, 1	N	F	F	0		5d_Female_15_DIP⍺_55810_tubGAL80_TraF_fruFLP_gfp488_nc82633	B3-G4
DIP-⍺-GAL4; UAS>stop>GFP.Myr/UAS-TraF; fruFLP/tub>GAL80>	Female	Brain		X, No U , 1	0	P, 1	N	X	F	0		6d_Female_3_DIP⍺_55810_tubGAL80_TraF_fruFLP_gfp488_FruM568_nc82633_02112019	B3-G7
DIP-⍺-GAL4; UAS>stop>GFP.Myr/UAS-TraF; fruFLP/tub>GAL80>	Female	Brain		No U, 1	2	A	N	F	F	0		5d_Female_16_DIP⍺_55810_tubGAL80_TraF_fruFLP_gfp488_nc82633	B3-H3
DIP-⍺-GAL4; UAS>stop>GFP.Myr/UAS-TraF; fruFLP/tub>GAL80>	Female	Brain		X, NoU, 1	1	A	N	F	F	0		5d_Female_13_DIP⍺_55810_tubGAL80_TraF_fruFLP_gfp488_nc82633	B3-J3
DIP-⍺-GAL4; UAS>stop>GFP.Myr/UAS-TraF; fruFLP/tub>GAL80>	Female	Brain		X, No U , 2	1	A	N	F	F	0		5d_Female_18_DIP⍺_55810_tubGAL80_TraF_fruFLP_gfp488_nc82633	B3-K8
DIP-⍺-GAL4; UAS>stop>GFP.Myr/UAS-TraF; fruFLP/tub>GAL80>	Female	Brain		X, No U , 1	1	A	N	F	F	0		5d_Female_11_DIP⍺_55810_tubGAL80_TraF_fruFLP_gfp488_nc82633	B3-M2
DIP-⍺-GAL4; UAS>stop>GFP.Myr/UAS-TraF; fruFLP/tub>GAL80>	Female	Brain		X, No U , 1	0	A	N	F	F	0		5d_Female_10_DIP⍺_55810_tubGAL80_TraF_fruFLP_gfp488_nc82633	B3-O4
DIP-⍺-GAL4; UAS>stop>GFP.Myr/UAS-TraF; fruFLP/tub>GAL80>	Female	Brain		X, No U, 0	0	A	N	F	F	0		5d_Female_12_DIP⍺_55810_tubGAL80_TraF_fruFLP_gfp488_nc82633	B3-V1
DIP-⍺-GAL4; UAS>stop>GFP.Myr/UAS-TraF; fruFLP/tub>GAL80>	Female	Brain		X, No U , 2	0	A	N	F	F	0		7d_Female_7_DIP⍺_55810_tubGAL80_TraF_fruFLP_gfp488_nc82633	B3-X5
DIP-⍺-GAL4; UAS>stop>GFP.Myr/UAS-TraF; fruFLP/tub>GAL80>	Female	Brain		X, No U , 1	0	A	N	M	F	0		7d_Female_6_DIP⍺_55810_tubGAL80_TraF_fruFLP_gfp488_FruM568_nc82633_02112019	B4-A5
DIP-⍺-GAL4; UAS>stop>GFP.Myr/UAS-TraF; fruFLP/tub>GAL80>	Female	Brain		X, No U , 1	1	A	N	F	F	0		5d_Female_14_DIP⍺_55810_tubGAL80_TraF_fruFLP_gfp488_nc82633	B4-D3
DIP-⍺-GAL4; UAS>stop>GFP.Myr/UAS-TraF; fruFLP/tub>GAL80>	Female	Brain		U, 1	0	P, 1	N	F	F	0		5d_Female_19_DIP⍺_55810_tubGAL80_TraF_fruFLP_gfp488_nc82633	B4-F3
DIP-⍺-GAL4; UAS>stop>GFP.Myr/UAS-TraF; fruFLP/tub>GAL80>	Female	Brain		U, 1	1	A	N	F	F	0		5d_Female_17_DIP⍺_55810_tubGAL80_TraF_fruFLP_gfp488_nc82633	B4-F6
DIP-⍺-GAL4; UAS>stop>GFP.Myr/UAS-TraF; fruFLP/tub>GAL80>	Female	Brain		U, 2	0	A	N	F	F	0		6d_Female_4_DIP⍺_55810_tubGAL80_TraF_fruFLP_gfp488_FruM568_nc82633_02112019	B4-G9
DIP-⍺-GAL4; UAS>stop>GFP.Myr/UAS-TraF; fruFLP/tub>GAL80>	Female	Brain		U, 2	0	A	N	F	N.A.	N.A.		6d_Female_1_DIP⍺_55810_tubGAL80_TraF_fruFLP_gfp488_FruM568_nc82633_02112019	B4-I9
DIP-⍺-GAL4; UAS>stop>GFP.Myr/UAS-TraF; fruFLP/tub>GAL80>	Female	Brain		X, No U, 2	2	A	N	F	F	1		7d_Female_9_DIP⍺_55810_tubGAL80_TraF_fruFLP_gfp488_nc82633	B4-J6
DIP-⍺-GAL4; UAS>stop>GFP.Myr/UAS-TraF; fruFLP/tub>GAL80>	Female	Brain		X, No U, 2	0	A	N	F	F	0		7d_Female_5_DIP⍺_55810_tubGAL80_TraF_fruFLP_gfp488_FruM568_nc82633_02112019	B4-K3
DIP-⍺-GAL4; UAS>stop>GFP.Myr/UAS-TraF; fruFLP/tub>GAL80>	Female	Brain		U, 1	0	A	N	F	F	0		6d_Female_2_DIP⍺_55810_tubGAL80_TraF_fruFLP_gfp488_FruM568_nc82633_02112019	B4-M6
Ex2			Projection pattern in AbG of VNC	U shaped projection pattern & number of neuron body in SEG	Lateral assending projection in VLP	Square shaped projection pattern in VLP	M shaped projection pattern above AL in the Medial Part of Midbrain	Horizontal projection in the Medial Part of Midbrain	Protocerebral projection in SMP	mAL neuron
Genotype	Sex	Sample	Male-Like Pattern (M) vs No signal (X) vs Female-Like Pattern (F)	Presence of U shaped pattern (U), Absense of signal (X); Number (#) of neuron body	Number (#) of lateral assending projection	Absense (A) vs Presence (P) of Square shaped pattern, Number (#) of the corresponding neuron body	Presence of M shaped projection pattern (YES/NO)	Male-Like Pattern (M) vs No signal (X) vs Female-Like Pattern (F)	Male-Like Pattern (M) vs Female-Like Pattern (F)	Number (#) of mAL neuron		File Name	Blind Number
DIP-⍺-GAL4; UAS>stop>GFP.Myr/UAS-FruMA; fruFLP/tub>GAL80>	Male	VNC	X									7d_Male_14_VNC__DIP⍺_55810_tubGAL80_FruMA_fruFLP	B3-D2
DIP-⍺-GAL4; UAS>stop>GFP.Myr/UAS-FruMA; fruFLP/tub>GAL80>	Male	VNC	X									7d_Male_10_VNC__DIP⍺_55810_tubGAL80_FruMA_fruFLP	B3-F2
DIP-⍺-GAL4; UAS>stop>GFP.Myr/UAS-FruMA; fruFLP/tub>GAL80>	Male	VNC	X									7d_Male_5_VNC__DIP⍺_55810_tubGAL80_FruMA_fruFLP	B3-F5
DIP-⍺-GAL4; UAS>stop>GFP.Myr/UAS-FruMA; fruFLP/tub>GAL80>	Male	VNC	X									7d_Male_6_VNC__DIP⍺_55810_tubGAL80_FruMA_fruFLP	B3-H5
DIP-⍺-GAL4; UAS>stop>GFP.Myr/UAS-FruMA; fruFLP/tub>GAL80>	Male	VNC	X									7d_Male_13_VNC__DIP⍺_55810_tubGAL80_FruMA_fruFLP	B3-H8
DIP-⍺-GAL4; UAS>stop>GFP.Myr/UAS-FruMA; fruFLP/tub>GAL80>	Male	VNC	X									7d_Male_17_VNC__DIP⍺_55810_tubGAL80_FruMA_fruFLP	B3-L6
DIP-⍺-GAL4; UAS>stop>GFP.Myr/UAS-FruMA; fruFLP/tub>GAL80>	Male	VNC	X									7d_Male_18_VNC__DIP⍺_55810_tubGAL80_FruMA_fruFLP	B3-L8
DIP-⍺-GAL4; UAS>stop>GFP.Myr/UAS-FruMA; fruFLP/tub>GAL80>	Male	VNC	X									7d_Male_15_VNC__DIP⍺_55810_tubGAL80_FruMA_fruFLP	B3-P1
DIP-⍺-GAL4; UAS>stop>GFP.Myr/UAS-FruMA; fruFLP/tub>GAL80>	Male	VNC	X									7d_Male_1_VNC__DIP⍺_55810_tubGAL80_FruMA_fruFLP	B3-P5
DIP-⍺-GAL4; UAS>stop>GFP.Myr/UAS-FruMA; fruFLP/tub>GAL80>	Male	VNC	X									7d_Male_2_VNC__DIP⍺_55810_tubGAL80_FruMA_fruFLP	B3-R3
DIP-⍺-GAL4; UAS>stop>GFP.Myr/UAS-FruMA; fruFLP/tub>GAL80>	Male	VNC	X									7d_Male_8_VNC__DIP⍺_55810_tubGAL80_FruMA_fruFLP	B3-S9
DIP-⍺-GAL4; UAS>stop>GFP.Myr/UAS-FruMA; fruFLP/tub>GAL80>	Male	VNC	X									7d_Male_12_VNC__DIP⍺_55810_tubGAL80_FruMA_fruFLP	B3-U8
DIP-⍺-GAL4; UAS>stop>GFP.Myr/UAS-FruMA; fruFLP/tub>GAL80>	Male	VNC	X									7d_Male_7_VNC__DIP⍺_55810_tubGAL80_FruMA_fruFLP	B3-W5
DIP-⍺-GAL4; UAS>stop>GFP.Myr/UAS-FruMA; fruFLP/tub>GAL80>	Male	VNC	X									7d_Male_16_VNC__DIP⍺_55810_tubGAL80_FruMA_fruFLP	B3-X3
DIP-⍺-GAL4; UAS>stop>GFP.Myr/UAS-FruMA; fruFLP/tub>GAL80>	Male	VNC	X									7d_Male_4_VNC__DIP⍺_55810_tubGAL80_FruMA_fruFLP	B3-X6
DIP-⍺-GAL4; UAS>stop>GFP.Myr/UAS-FruMA; fruFLP/tub>GAL80>	Male	VNC	X									7d_Male_11_VNC__DIP⍺_55810_tubGAL80_FruMA_fruFLP	B4-H9
DIP-⍺-GAL4; UAS>stop>GFP.Myr/UAS-FruMA; fruFLP/tub>GAL80>	Male	VNC	X									7d_Male_9_VNC__DIP⍺_55810_tubGAL80_FruMA_fruFLP	B4-I4
DIP-⍺-GAL4; UAS>stop>GFP.Myr/UAS-FruMA; fruFLP/tub>GAL80>	Male	VNC	X									7d_Male_3_VNC__DIP⍺_55810_tubGAL80_FruMA_fruFLP	B4-K9
DIP-⍺-GAL4; UAS>stop>GFP.Myr/UAS-FruMA; fruFLP/tub>GAL80>	Female	VNC	F									7d_Female_15_vnc_DIP⍺_55810_tubGAL80_FruMA_fruFLP	B3-N6
DIP-⍺-GAL4; UAS>stop>GFP.Myr/UAS-FruMA; fruFLP/tub>GAL80>	Female	VNC	M									7d_Female_14_vnc_DIP⍺_55810_tubGAL80_FruMA_fruFLP	B3-G2
DIP-⍺-GAL4; UAS>stop>GFP.Myr/UAS-FruMA; fruFLP/tub>GAL80>	Female	VNC	X									7d_Female_4_vnc_DIP⍺_55810_tubGAL80_FruMA_fruFLP	B3-D3
DIP-⍺-GAL4; UAS>stop>GFP.Myr/UAS-FruMA; fruFLP/tub>GAL80>	Female	VNC	X									7d_Female_8_vnc_DIP⍺_55810_tubGAL80_FruMA_fruFLP	B3-E2
DIP-⍺-GAL4; UAS>stop>GFP.Myr/UAS-FruMA; fruFLP/tub>GAL80>	Female	VNC	X									5d_Female_1_vnc_DIP⍺_55810_tubGAL80_FruMA_fruFLP_FruM546_gfp488_nc82633_20190408	B3-G8
DIP-⍺-GAL4; UAS>stop>GFP.Myr/UAS-FruMA; fruFLP/tub>GAL80>	Female	VNC	X									7d_Female_13_vnc_DIP⍺_55810_tubGAL80_FruMA_fruFLP	B3-I7
DIP-⍺-GAL4; UAS>stop>GFP.Myr/UAS-FruMA; fruFLP/tub>GAL80>	Female	VNC	X									5d_Female_3_vnc_DIP⍺_55810_tubGAL80_FruMA_fruFLP_FruM546_gfp488_nc82633_20190408	B3-J1
DIP-⍺-GAL4; UAS>stop>GFP.Myr/UAS-FruMA; fruFLP/tub>GAL80>	Female	VNC	X									7d_Female_6_vnc_DIP⍺_55810_tubGAL80_FruMA_fruFLP	B3-K4
DIP-⍺-GAL4; UAS>stop>GFP.Myr/UAS-FruMA; fruFLP/tub>GAL80>	Female	VNC	X									7d_Female_5_vnc_DIP⍺_55810_tubGAL80_FruMA_fruFLP	B3-M3
DIP-⍺-GAL4; UAS>stop>GFP.Myr/UAS-FruMA; fruFLP/tub>GAL80>	Female	VNC	X									7d_Female_12_vnc_DIP⍺_55810_tubGAL80_FruMA_fruFLP	B3-O3
DIP-⍺-GAL4; UAS>stop>GFP.Myr/UAS-FruMA; fruFLP/tub>GAL80>	Female	VNC	X									7d_Female_10_vnc_DIP⍺_55810_tubGAL80_FruMA_fruFLP	B3-T8
DIP-⍺-GAL4; UAS>stop>GFP.Myr/UAS-FruMA; fruFLP/tub>GAL80>	Female	VNC	X									7d_Female_11_vnc_DIP⍺_55810_tubGAL80_FruMA_fruFLP	B3-W6
DIP-⍺-GAL4; UAS>stop>GFP.Myr/UAS-FruMA; fruFLP/tub>GAL80>	Female	VNC	X									7d_Female_9_vnc_DIP⍺_55810_tubGAL80_FruMA_fruFLP	B3-W9
DIP-⍺-GAL4; UAS>stop>GFP.Myr/UAS-FruMA; fruFLP/tub>GAL80>	Female	VNC	X									5d_Female_2_vnc_DIP⍺_55810_tubGAL80_FruMA_fruFLP_FruM546_gfp488_nc82633_20190408	B4-E8
DIP-⍺-GAL4; UAS>stop>GFP.Myr/UAS-FruMA; fruFLP/tub>GAL80>	Female	VNC	X									7d_Female_7_vnc_DIP⍺_55810_tubGAL80_FruMA_fruFLP	B4-L2
DIP-⍺-GAL4; UAS>stop>GFP.Myr/UAS-FruMA; fruFLP/tub>GAL80>	Male	Brain		X, 0	0	A	N	X	M	0		7d_Male_16_DIP⍺_55810_tubGAL80_FruMA_fruFLP	B3-B1
DIP-⍺-GAL4; UAS>stop>GFP.Myr/UAS-FruMA; fruFLP/tub>GAL80>	Male	Brain		X, 0	0	A	N	X	M	0		7d_Male_8_DIP⍺_55810_tubGAL80_FruMA_fruFLP	B3-B9
DIP-⍺-GAL4; UAS>stop>GFP.Myr/UAS-FruMA; fruFLP/tub>GAL80>	Male	Brain		X, 0	0	A	N	X	M	0		7d_Male_10_DIP⍺_55810_tubGAL80_FruMA_fruFLP	B3-H2
DIP-⍺-GAL4; UAS>stop>GFP.Myr/UAS-FruMA; fruFLP/tub>GAL80>	Male	Brain		X, 0	0	A	N	X	M	0		6d_Male_6_DIP⍺_55810_tubGAL80_FruMA_fruFLP	B3-L9
DIP-⍺-GAL4; UAS>stop>GFP.Myr/UAS-FruMA; fruFLP/tub>GAL80>	Male	Brain		X, 0	0	A	N	X	M	0		7d_Male_15_DIP⍺_55810_tubGAL80_FruMA_fruFLP	B3-N2
DIP-⍺-GAL4; UAS>stop>GFP.Myr/UAS-FruMA; fruFLP/tub>GAL80>	Male	Brain		X, 0	0	A	N	M	M	0		7d_Male_9_DIP⍺_55810_tubGAL80_FruMA_fruFLP	B3-N5
DIP-⍺-GAL4; UAS>stop>GFP.Myr/UAS-FruMA; fruFLP/tub>GAL80>	Male	Brain		X, 0	0	A	N	X	M	0		5d_Male_2_DIP⍺_55810_tubGAL80_FruMA_fruFLP_FruM546_gfp488_nc82633_20190408	B3-N8
DIP-⍺-GAL4; UAS>stop>GFP.Myr/UAS-FruMA; fruFLP/tub>GAL80>	Male	Brain		X, 0	0	A	N	X	M	0		5d_Male_5_DIP⍺_55810_tubGAL80_FruMA_fruFLP_FruM546_gfp488_nc82633_20190408	B3-P9
DIP-⍺-GAL4; UAS>stop>GFP.Myr/UAS-FruMA; fruFLP/tub>GAL80>	Male	Brain		X, 0	0	A	N	X	M	0		7d_Male_14_DIP⍺_55810_tubGAL80_FruMA_fruFLP	B3-S7
DIP-⍺-GAL4; UAS>stop>GFP.Myr/UAS-FruMA; fruFLP/tub>GAL80>	Male	Brain		X, 0	0	A	N	X	M	0		5d_Male_4_DIP⍺_55810_tubGAL80_FruMA_fruFLP_FruM546_gfp488_nc82633_20190408	B3-U9
DIP-⍺-GAL4; UAS>stop>GFP.Myr/UAS-FruMA; fruFLP/tub>GAL80>	Male	Brain		X, 0	0	A	N	X	M	0		5d_Male_1_DIP⍺_55810_tubGAL80_FruMA_fruFLP_FruM546_gfp488_nc82633_20190408	B3-V8
DIP-⍺-GAL4; UAS>stop>GFP.Myr/UAS-FruMA; fruFLP/tub>GAL80>	Male	Brain		X, 0	0	A	N	X	M	0		7d_Male_13_DIP⍺_55810_tubGAL80_FruMA_fruFLP	B3-Y5
DIP-⍺-GAL4; UAS>stop>GFP.Myr/UAS-FruMA; fruFLP/tub>GAL80>	Male	Brain		X, 0	0	A	N	X	M	0		7d_Male_12_DIP⍺_55810_tubGAL80_FruMA_fruFLP	B4-B7
DIP-⍺-GAL4; UAS>stop>GFP.Myr/UAS-FruMA; fruFLP/tub>GAL80>	Male	Brain		X, 0	0	A	N	X	M	0		7d_Male_7_DIP⍺_55810_tubGAL80_FruMA_fruFLP	B4-E2
DIP-⍺-GAL4; UAS>stop>GFP.Myr/UAS-FruMA; fruFLP/tub>GAL80>	Male	Brain		X, 0	0	A	N	X	M	0		7d_Male_17_DIP⍺_55810_tubGAL80_FruMA_fruFLP	B4-E6
DIP-⍺-GAL4; UAS>stop>GFP.Myr/UAS-FruMA; fruFLP/tub>GAL80>	Male	Brain		X, 0	0	A	N	X	M	0		7d_Male_11_DIP⍺_55810_tubGAL80_FruMA_fruFLP	B4-F2
DIP-⍺-GAL4; UAS>stop>GFP.Myr/UAS-FruMA; fruFLP/tub>GAL80>	Male	Brain		X, 0	0	A	N	X	M	0		5d_Male_3_DIP⍺_55810_tubGAL80_FruMA_fruFLP_FruM546_gfp488_nc82633_20190408	B4-K2
DIP-⍺-GAL4; UAS>stop>GFP.Myr/UAS-FruMA; fruFLP/tub>GAL80>	Female	Brain		X, No U , 1	0	A	N	X	M	0		6d_Female_17_DIP⍺_55810_tubGAL80_FruMA_fruFLP_FruM546_gfp488_nc82633_20190408	B3-B6
DIP-⍺-GAL4; UAS>stop>GFP.Myr/UAS-FruMA; fruFLP/tub>GAL80>	Female	Brain		X, No U, 1	0	A	N	F	M	0		6d_Female_11_DIP⍺_55810_tubGAL80_FruMA_fruFLP	B3-C4
DIP-⍺-GAL4; UAS>stop>GFP.Myr/UAS-FruMA; fruFLP/tub>GAL80>	Female	Brain		X, 0	0	A	N	X	M	0		6d_Female_10_DIP⍺_55810_tubGAL80_FruMA_fruFLP	B3-C9
DIP-⍺-GAL4; UAS>stop>GFP.Myr/UAS-FruMA; fruFLP/tub>GAL80>	Female	Brain		U, 1	1	A	N	X	F	0		5d_Female_1_DIP⍺_55810_tubGAL80_FruMA_fruFLP_FruM546_gfp488_nc82633_20190408	B3-I8
DIP-⍺-GAL4; UAS>stop>GFP.Myr/UAS-FruMA; fruFLP/tub>GAL80>	Female	Brain		No U, 1	0	A	N	X	M	0		5d_Female_3_DIP⍺_55810_tubGAL80_FruMA_fruFLP_FruM546_gfp488_nc82633_20190408	B3-J8
DIP-⍺-GAL4; UAS>stop>GFP.Myr/UAS-FruMA; fruFLP/tub>GAL80>	Female	Brain		U, 1	0	A	N	F	M	0		6d_Female_9_DIP⍺_55810_tubGAL80_FruMA_fruFLP	B3-L2
DIP-⍺-GAL4; UAS>stop>GFP.Myr/UAS-FruMA; fruFLP/tub>GAL80>	Female	Brain		X, No U, 0	0	A	N	F	F	0		7d_Female_6_DIP⍺_55810_tubGAL80_FruMA_fruFLP_FruM546_gfp488_nc82633_20190408	B3-M7
DIP-⍺-GAL4; UAS>stop>GFP.Myr/UAS-FruMA; fruFLP/tub>GAL80>	Female	Brain		X, 0	0	A	N	F	F	0		5d_Female_5_DIP⍺_55810_tubGAL80_FruMA_fruFLP_FruM546_gfp488_nc82633_20190408	B3-N1
DIP-⍺-GAL4; UAS>stop>GFP.Myr/UAS-FruMA; fruFLP/tub>GAL80>	Female	Brain		No U, 0	0	A	N	F	M	0		6d_Female_12_DIP⍺_55810_tubGAL80_FruMA_fruFLP	B3-T5
DIP-⍺-GAL4; UAS>stop>GFP.Myr/UAS-FruMA; fruFLP/tub>GAL80>	Female	Brain		No U , 2	0	A	N	F	F	0		7d_Female_5_DIP⍺_55810_tubGAL80_FruMA_fruFLP_FruM546_gfp488_nc82633_20190408	B3-V4
DIP-⍺-GAL4; UAS>stop>GFP.Myr/UAS-FruMA; fruFLP/tub>GAL80>	Female	Brain		No U , 1	0	A	N	X	F	0		6d_Female_18_DIP⍺_55810_tubGAL80_FruMA_fruFLP_FruM546_gfp488_nc82633_20190408	B3-W3
DIP-⍺-GAL4; UAS>stop>GFP.Myr/UAS-FruMA; fruFLP/tub>GAL80>	Female	Brain		No U , 1	0	A	N	F	F	0		5d_Female_4_DIP⍺_55810_tubGAL80_FruMA_fruFLP_FruM546_gfp488_nc82633_20190408	B3-Z5
DIP-⍺-GAL4; UAS>stop>GFP.Myr/UAS-FruMA; fruFLP/tub>GAL80>	Female	Brain		No U , 1	0	A	N	X	M	0		6d_Female_15_DIP⍺_55810_tubGAL80_FruMA_fruFLP_FruM546_gfp488_nc82633_20190408	B4-A1
DIP-⍺-GAL4; UAS>stop>GFP.Myr/UAS-FruMA; fruFLP/tub>GAL80>	Female	Brain		X, No U, 0	0	A	N	F	F	0		5d_Female_2_DIP⍺_55810_tubGAL80_FruMA_fruFLP_FruM546_gfp488_nc82633_20190408	B4-B1
DIP-⍺-GAL4; UAS>stop>GFP.Myr/UAS-FruMA; fruFLP/tub>GAL80>	Female	Brain		No U , 1	0	A	N	F	F	0		7d_Female_7_DIP⍺_55810_tubGAL80_FruMA_fruFLP_FruM546_gfp488_nc82633_20190408	B4-B6
DIP-⍺-GAL4; UAS>stop>GFP.Myr/UAS-FruMA; fruFLP/tub>GAL80>	Female	Brain		No U, 0	0	A	N	F	F	0		6d_Female_16_DIP⍺_55810_tubGAL80_FruMA_fruFLP_FruM546_gfp488_nc82633_20190408	B4-C4
DIP-⍺-GAL4; UAS>stop>GFP.Myr/UAS-FruMA; fruFLP/tub>GAL80>	Female	Brain		N.A.	0	A	N	F	F	0		6d_Female_8_DIP⍺_55810_tubGAL80_FruMA_fruFLP	B4-K6
DIP-⍺-GAL4; UAS>stop>GFP.Myr/UAS-FruMA; fruFLP/tub>GAL80>	Female	Brain		X, No U, 0	0	A	N	F	F	0		6d_Female_14_DIP⍺_55810_tubGAL80_FruMA_fruFLP	B4-L1
DIP-⍺-GAL4; UAS>stop>GFP.Myr/UAS-FruMA; fruFLP/tub>GAL80>	Female	Brain		U, 1	0	A	N	F	N.A.	N.A.		6d_Female_13_DIP⍺_55810_tubGAL80_FruMA_fruFLP	B4-M8
Ex3			Projection pattern in AbG of VNC	U shaped projection pattern & number of neuron body in SEG	Lateral assending projection in VLP	Square shaped projection pattern in VLP	M shaped projection pattern above AL in the Medial Part of Midbrain	Horizontal projection in the Medial Part of Midbrain	Protocerebral projection in SMP	mAL neuron
Genotype	Sex	Sample	Male-Like Pattern (M) vs No signal (X) vs Female-Like Pattern (F)	Presence of U shaped pattern (U), Absense of signal (X); Number (#) of neuron body	Number (#) of lateral assending projection	Absense (A) vs Presence (P) of Square shaped pattern, Number (#) of the corresponding neuron body	Presence of M shaped projection pattern (YES/NO)	Male-Like Pattern (M) vs No signal (X) vs Female-Like Pattern (F)	Male-Like Pattern (M) vs Female-Like Pattern (F)	Number (#) of mAL neuron		File Name	Blind Number
DIP-⍺-GAL4; UAS>stop>GFP.Myr/UAS-FruMB; fruFLP/tub>GAL80>	Male	VNC	M									7d_Male_1_vnc_DIP⍺_55810_tubGAL80_FruMB_fruFLP	B3-U5
DIP-⍺-GAL4; UAS>stop>GFP.Myr/UAS-FruMB; fruFLP/tub>GAL80>	Male	VNC	M									7d_Male_8_vnc_DIP⍺_55810_tubGAL80_FruMB_fruFLP	B4-A7
DIP-⍺-GAL4; UAS>stop>GFP.Myr/UAS-FruMB; fruFLP/tub>GAL80>	Male	VNC	M									7d_Male_13_vnc_DIP⍺_55810_tubGAL80_FruMB_fruFLP	B4-A9
DIP-⍺-GAL4; UAS>stop>GFP.Myr/UAS-FruMB; fruFLP/tub>GAL80>	Male	VNC	M									7d_Male_10_vnc_DIP⍺_55810_tubGAL80_FruMB_fruFLP	B4-H3
DIP-⍺-GAL4; UAS>stop>GFP.Myr/UAS-FruMB; fruFLP/tub>GAL80>	Male	VNC	M									7d_Male_9_vnc_DIP⍺_55810_tubGAL80_FruMB_fruFLP	B3-W4
DIP-⍺-GAL4; UAS>stop>GFP.Myr/UAS-FruMB; fruFLP/tub>GAL80>	Male	VNC	M									7d_Male_4_vnc_DIP⍺_55810_tubGAL80_FruMB_fruFLP	B3-Y1
DIP-⍺-GAL4; UAS>stop>GFP.Myr/UAS-FruMB; fruFLP/tub>GAL80>	Male	VNC	M									7d_Male_12_vnc_DIP⍺_55810_tubGAL80_FruMB_fruFLP	B4-G8
DIP-⍺-GAL4; UAS>stop>GFP.Myr/UAS-FruMB; fruFLP/tub>GAL80>	Male	VNC	M									7d_Male_11_vnc_DIP⍺_55810_tubGAL80_FruMB_fruFLP	B3-R7
DIP-⍺-GAL4; UAS>stop>GFP.Myr/UAS-FruMB; fruFLP/tub>GAL80>	Male	VNC	N.A.									7d_Male_6_vnc_DIP⍺_55810_tubGAL80_FruMB_fruFLP	B4-B4
DIP-⍺-GAL4; UAS>stop>GFP.Myr/UAS-FruMB; fruFLP/tub>GAL80>	Male	VNC	X									7d_Male_2_vnc_DIP⍺_55810_tubGAL80_FruMB_fruFLP	B3-A8
DIP-⍺-GAL4; UAS>stop>GFP.Myr/UAS-FruMB; fruFLP/tub>GAL80>	Male	VNC	X									7d_Male_15_vnc_DIP⍺_55810_tubGAL80_FruMB_fruFLP	B3-B2
DIP-⍺-GAL4; UAS>stop>GFP.Myr/UAS-FruMB; fruFLP/tub>GAL80>	Male	VNC	X									7d_Male_16_vnc_DIP⍺_55810_tubGAL80_FruMB_fruFLP	B3-G5
DIP-⍺-GAL4; UAS>stop>GFP.Myr/UAS-FruMB; fruFLP/tub>GAL80>	Male	VNC	X									7d_Male_5_vnc_DIP⍺_55810_tubGAL80_FruMB_fruFLP	B3-G6
DIP-⍺-GAL4; UAS>stop>GFP.Myr/UAS-FruMB; fruFLP/tub>GAL80>	Male	VNC	X									7d_Male_7_vnc_DIP⍺_55810_tubGAL80_FruMB_fruFLP	B3-J7
DIP-⍺-GAL4; UAS>stop>GFP.Myr/UAS-FruMB; fruFLP/tub>GAL80>	Male	VNC	X									7d_Male_3_vnc_DIP⍺_55810_tubGAL80_FruMB_fruFLP	B4-L4
DIP-⍺-GAL4; UAS>stop>GFP.Myr/UAS-FruMB; fruFLP/tub>GAL80>	Male	VNC	X									7d_Male_14_vnc_DIP⍺_55810_tubGAL80_FruMB_fruFLP	B4-L8
DIP-⍺-GAL4; UAS>stop>GFP.Myr/UAS-FruMB; fruFLP/tub>GAL80>	Female	VNC	F									7d_Female_4_vnc_DIP⍺_55810_tubGAL80_FruMB_fruFLP	B3-D5
DIP-⍺-GAL4; UAS>stop>GFP.Myr/UAS-FruMB; fruFLP/tub>GAL80>	Female	VNC	F									7d_Female_8_vnc_DIP⍺_55810_tubGAL80_FruMB_fruFLP	B3-D6
DIP-⍺-GAL4; UAS>stop>GFP.Myr/UAS-FruMB; fruFLP/tub>GAL80>	Female	VNC	F									7d_Female_15_vnc_DIP⍺_55810_tubGAL80_FruMB_fruFLP	B3-E3
DIP-⍺-GAL4; UAS>stop>GFP.Myr/UAS-FruMB; fruFLP/tub>GAL80>	Female	VNC	F									7d_Female_11_vnc_DIP⍺_55810_tubGAL80_FruMB_fruFLP	B3-O6
DIP-⍺-GAL4; UAS>stop>GFP.Myr/UAS-FruMB; fruFLP/tub>GAL80>	Female	VNC	F									7d_Female_13_vnc_DIP⍺_55810_tubGAL80_FruMB_fruFLP	B3-Q6
DIP-⍺-GAL4; UAS>stop>GFP.Myr/UAS-FruMB; fruFLP/tub>GAL80>	Female	VNC	F									7d_Female_9_vnc_DIP⍺_55810_tubGAL80_FruMB_fruFLP	B3-T1
DIP-⍺-GAL4; UAS>stop>GFP.Myr/UAS-FruMB; fruFLP/tub>GAL80>	Female	VNC	F									7d_Female_6_vnc_DIP⍺_55810_tubGAL80_FruMB_fruFLP	B3-T7
DIP-⍺-GAL4; UAS>stop>GFP.Myr/UAS-FruMB; fruFLP/tub>GAL80>	Female	VNC	F									7d_Female_7_vnc_DIP⍺_55810_tubGAL80_FruMB_fruFLP	B3-Y6
DIP-⍺-GAL4; UAS>stop>GFP.Myr/UAS-FruMB; fruFLP/tub>GAL80>	Female	VNC	F									7d_Female_14_vnc_DIP⍺_55810_tubGAL80_FruMB_fruFLP	B4-J9
DIP-⍺-GAL4; UAS>stop>GFP.Myr/UAS-FruMB; fruFLP/tub>GAL80>	Female	VNC	F									7d_Female_5_vnc_DIP⍺_55810_tubGAL80_FruMB_fruFLP	B3-Q8
DIP-⍺-GAL4; UAS>stop>GFP.Myr/UAS-FruMB; fruFLP/tub>GAL80>	Female	VNC	F									7d_Female_3_vnc_DIP⍺_55810_tubGAL80_FruMB_fruFLP	B4-E4
DIP-⍺-GAL4; UAS>stop>GFP.Myr/UAS-FruMB; fruFLP/tub>GAL80>	Female	VNC	F									7d_Female_12_vnc_DIP⍺_55810_tubGAL80_FruMB_fruFLP	B4-F8
DIP-⍺-GAL4; UAS>stop>GFP.Myr/UAS-FruMB; fruFLP/tub>GAL80>	Female	VNC	X									7d_Female_2_vnc_DIP⍺_55810_tubGAL80_FruMB_fruFLP	B3-F6
DIP-⍺-GAL4; UAS>stop>GFP.Myr/UAS-FruMB; fruFLP/tub>GAL80>	Female	VNC	X									7d_Female_1_vnc_DIP⍺_55810_tubGAL80_FruMB_fruFLP	B3-G1
DIP-⍺-GAL4; UAS>stop>GFP.Myr/UAS-FruMB; fruFLP/tub>GAL80>	Female	VNC	X									7d_Female_10_vnc_DIP⍺_55810_tubGAL80_FruMB_fruFLP	B4-K7
DIP-⍺-GAL4; UAS>stop>GFP.Myr/UAS-FruMB; fruFLP/tub>GAL80>	Male	Brain		No U, 1	0	A	Y	M	M	0		7d_Male_11_DIP⍺_55810_tubGAL80_FruMB_fruFLP_FruM546_gfp488_nc82633_20190408	B3-B7
DIP-⍺-GAL4; UAS>stop>GFP.Myr/UAS-FruMB; fruFLP/tub>GAL80>	Male	Brain		X, No U, 0	0	A	Y	X	M	0		7d_Male_13_DIP⍺_55810_tubGAL80_FruMB_fruFLP_FruM546_gfp488_nc82633_20190408	B3-D9
DIP-⍺-GAL4; UAS>stop>GFP.Myr/UAS-FruMB; fruFLP/tub>GAL80>	Male	Brain		No U, 0	0	A	Y	X	M	0		7d_Male_9_DIP⍺_55810_tubGAL80_FruMB_fruFLP_FruM546_gfp488_nc82633_20190408	B3-E8
DIP-⍺-GAL4; UAS>stop>GFP.Myr/UAS-FruMB; fruFLP/tub>GAL80>	Male	Brain		X, No U, 0	0	A	Y	M	M	0		6d_Male_3_DIP⍺_55810_tubGAL80_FruMB_fruFLP_FruM546_gfp488_nc82633_20190408	B3-H1
DIP-⍺-GAL4; UAS>stop>GFP.Myr/UAS-FruMB; fruFLP/tub>GAL80>	Male	Brain		No U, 0	0	A	Y	M	M	0		6d_Male_2_DIP⍺_55810_tubGAL80_FruMB_fruFLP_FruM546_gfp488_nc82633_20190408	B3-H7
DIP-⍺-GAL4; UAS>stop>GFP.Myr/UAS-FruMB; fruFLP/tub>GAL80>	Male	Brain		No U, 0	0	A	Y	M	F	0		7d_Male_10_DIP⍺_55810_tubGAL80_FruMB_fruFLP_FruM546_gfp488_nc82633_20190408	B3-H9
DIP-⍺-GAL4; UAS>stop>GFP.Myr/UAS-FruMB; fruFLP/tub>GAL80>	Male	Brain		X, 0	0	A	N	X	M	0		6d_Male_7_DIP⍺_55810_tubGAL80_FruMB_fruFLP	B3-I6
DIP-⍺-GAL4; UAS>stop>GFP.Myr/UAS-FruMB; fruFLP/tub>GAL80>	Male	Brain		X, No U, 0	0	A	Y	M	M	0		7d_Male_8_DIP⍺_55810_tubGAL80_FruMB_fruFLP_FruM546_gfp488_nc82633_20190408	B3-P8
DIP-⍺-GAL4; UAS>stop>GFP.Myr/UAS-FruMB; fruFLP/tub>GAL80>	Male	Brain		No U , 1	0	A	Y	M	M	0		7d_Male_16_DIP⍺_55810_tubGAL80_FruMB_fruFLP_FruM546_gfp488_nc82633_20190408	B3-S1
DIP-⍺-GAL4; UAS>stop>GFP.Myr/UAS-FruMB; fruFLP/tub>GAL80>	Male	Brain		X, No U, 0	0	A	N	M	M	0		7d_Male_12_DIP⍺_55810_tubGAL80_FruMB_fruFLP_FruM546_gfp488_nc82633_20190408	B3-T2
DIP-⍺-GAL4; UAS>stop>GFP.Myr/UAS-FruMB; fruFLP/tub>GAL80>	Male	Brain		X, No U, 0	0	A	Y	M	M	0		7d_Male_15_DIP⍺_55810_tubGAL80_FruMB_fruFLP_FruM546_gfp488_nc82633_20190408	B3-V9
DIP-⍺-GAL4; UAS>stop>GFP.Myr/UAS-FruMB; fruFLP/tub>GAL80>	Male	Brain		U, 0	0	A	Y	M	M	0		6d_Male_4_DIP⍺_55810_tubGAL80_FruMB_fruFLP_FruM546_gfp488_nc82633_20190408	B3-X7
DIP-⍺-GAL4; UAS>stop>GFP.Myr/UAS-FruMB; fruFLP/tub>GAL80>	Male	Brain		X, No U, 0	0	A	Y	M	M	0		4d_Male_14_DIP⍺_55810_tubGAL80_FruMB_fruFLP_FruM546_gfp488_nc82633_20190408	B4-B5
DIP-⍺-GAL4; UAS>stop>GFP.Myr/UAS-FruMB; fruFLP/tub>GAL80>	Male	Brain		X, 0	0	A	N	M	M	0		6d_Male_1_DIP⍺_55810_tubGAL80_FruMB_fruFLP_FruM546_gfp488_nc82633_20190408	B4-F9
DIP-⍺-GAL4; UAS>stop>GFP.Myr/UAS-FruMB; fruFLP/tub>GAL80>	Male	Brain		X, 0	0	A	N	M	M	0		6d_Male_6_DIP⍺_55810_tubGAL80_FruMB_fruFLP_FruM546_gfp488_nc82633_20190408	B4-H7
DIP-⍺-GAL4; UAS>stop>GFP.Myr/UAS-FruMB; fruFLP/tub>GAL80>	Male	Brain		U, 0	1	A	N	M	M	0		6d_Male_5_DIP⍺_55810_tubGAL80_FruMB_fruFLP_FruM546_gfp488_nc82633_20190408	B4-M1
DIP-⍺-GAL4; UAS>stop>GFP.Myr/UAS-FruMB; fruFLP/tub>GAL80>	Female	Brain		No U, 2	1	A	N	F	F	1		7d_Female_4_DIP⍺_55810_tubGAL80_FruMB_fruFLP_FruM546_gfp488_nc82633_20190408	B3-A1
DIP-⍺-GAL4; UAS>stop>GFP.Myr/UAS-FruMB; fruFLP/tub>GAL80>	Female	Brain		U, 1	2	P, 0	N	F	F	0		7d_Female_5_DIP⍺_55810_tubGAL80_FruMB_fruFLP_FruM546_gfp488_nc82633_20190408	B3-A3
DIP-⍺-GAL4; UAS>stop>GFP.Myr/UAS-FruMB; fruFLP/tub>GAL80>	Female	Brain		No U, 0	0	A	N	F	F	0		7d_Female_23_DIP⍺_55810_tubGAL80_FruMB_fruFLP	B3-A9
DIP-⍺-GAL4; UAS>stop>GFP.Myr/UAS-FruMB; fruFLP/tub>GAL80>	Female	Brain		No U, 1	0	A	N	F	F	0		7d_Female_18_DIP⍺_55810_tubGAL80_FruMB_fruFLP	B3-C7
DIP-⍺-GAL4; UAS>stop>GFP.Myr/UAS-FruMB; fruFLP/tub>GAL80>	Female	Brain		U, 2	0	A	N	F	F	0		6d_Female_4_DIP⍺_55810_tubGAL80_FruMB_fruFLP_FruM546_gfp488_nc82633_20190408	B3-D1
DIP-⍺-GAL4; UAS>stop>GFP.Myr/UAS-FruMB; fruFLP/tub>GAL80>	Female	Brain		No U, 2	0	A	N	F	F	0		7d_Female_7_DIP⍺_55810_tubGAL80_FruMB_fruFLP_FruM546_gfp488_nc82633_20190408	B3-F9
DIP-⍺-GAL4; UAS>stop>GFP.Myr/UAS-FruMB; fruFLP/tub>GAL80>	Female	Brain		No U , 1	0	P, 0	N	F	F	0		7d_Female_6_DIP⍺_55810_tubGAL80_FruMB_fruFLP_FruM546_gfp488_nc82633_20190408	B3-H6
DIP-⍺-GAL4; UAS>stop>GFP.Myr/UAS-FruMB; fruFLP/tub>GAL80>	Female	Brain		No U, 2	1	A	N	F	F	0		7d_Female_21_DIP⍺_55810_tubGAL80_FruMB_fruFLP	B3-J2
DIP-⍺-GAL4; UAS>stop>GFP.Myr/UAS-FruMB; fruFLP/tub>GAL80>	Female	Brain		No U , 2	0	A	N	F	F	0		6d_Female_2_DIP⍺_55810_tubGAL80_FruMB_fruFLP_FruM546_gfp488_nc82633_20190408	B3-N9
DIP-⍺-GAL4; UAS>stop>GFP.Myr/UAS-FruMB; fruFLP/tub>GAL80>	Female	Brain		No U, 0	1	P, 1	N	F	F	0		7d_Female_15_DIP⍺_55810_tubGAL80_FruMB_fruFLP	B3-O2
DIP-⍺-GAL4; UAS>stop>GFP.Myr/UAS-FruMB; fruFLP/tub>GAL80>	Female	Brain		No U, 1	1	A	N	F	F	0		4d_Female_2_DIP⍺_55810_tubGAL80_FruMB_fruFLP_FruM546_gfp488_nc82633_20190408	B3-P2
DIP-⍺-GAL4; UAS>stop>GFP.Myr/UAS-FruMB; fruFLP/tub>GAL80>	Female	Brain		No U, 1	0	P, 0	N	F	F	0		6d_Female_3_DIP⍺_55810_tubGAL80_FruMB_fruFLP_FruM546_gfp488_nc82633_20190408	B3-P7
DIP-⍺-GAL4; UAS>stop>GFP.Myr/UAS-FruMB; fruFLP/tub>GAL80>	Female	Brain		No U , 2	1	A	N	F	F	0		7d_Female_22_DIP⍺_55810_tubGAL80_FruMB_fruFLP	B3-R6
DIP-⍺-GAL4; UAS>stop>GFP.Myr/UAS-FruMB; fruFLP/tub>GAL80>	Female	Brain		No U , 1	2	P, 0	N	F	F	0		7d_Female_2_DIP⍺_55810_tubGAL80_FruMB_fruFLP_FruM546_gfp488_nc82633_20190408	B3-S3
DIP-⍺-GAL4; UAS>stop>GFP.Myr/UAS-FruMB; fruFLP/tub>GAL80>	Female	Brain		No U, 2	1	P, 0	N	F	F	0		5d_Female_1_DIP⍺_55810_tubGAL80_FruMB_fruFLP_FruM546_gfp488_nc82633_20190408	B3-V7
DIP-⍺-GAL4; UAS>stop>GFP.Myr/UAS-FruMB; fruFLP/tub>GAL80>	Female	Brain		No U, 1	0	P, 0	N	M	F	0		6d_Female_1_DIP⍺_55810_tubGAL80_FruMB_fruFLP_FruM546_gfp488_nc82633_20190408	B3-Y4
DIP-⍺-GAL4; UAS>stop>GFP.Myr/UAS-FruMB; fruFLP/tub>GAL80>	Female	Brain		No U, 1	1	P, 0	N	F	F	0		7d_Female_17_DIP⍺_55810_tubGAL80_FruMB_fruFLP	B3-Z9
DIP-⍺-GAL4; UAS>stop>GFP.Myr/UAS-FruMB; fruFLP/tub>GAL80>	Female	Brain		No U, 2	0	A	N	F	F	0		7d_Female_3_DIP⍺_55810_tubGAL80_FruMB_fruFLP_FruM546_gfp488_nc82633_20190408	B4-D5
DIP-⍺-GAL4; UAS>stop>GFP.Myr/UAS-FruMB; fruFLP/tub>GAL80>	Female	Brain		U, 2	1	A	N	F	F	1		7d_Female_1_DIP⍺_55810_tubGAL80_FruMB_fruFLP_FruM546_gfp488_nc82633_20190408	B4-F1
DIP-⍺-GAL4; UAS>stop>GFP.Myr/UAS-FruMB; fruFLP/tub>GAL80>	Female	Brain		No U, 2	0	A	N	F	F	0		7d_Female_19_DIP⍺_55810_tubGAL80_FruMB_fruFLP	B4-J4
DIP-⍺-GAL4; UAS>stop>GFP.Myr/UAS-FruMB; fruFLP/tub>GAL80>	Female	Brain		U, 1	0	A	N	F	F	0		6d_Female_5_DIP⍺_55810_tubGAL80_FruMB_fruFLP_FruM546_gfp488_nc82633_20190408	B4-L9
DIP-⍺-GAL4; UAS>stop>GFP.Myr/UAS-FruMB; fruFLP/tub>GAL80>	Female	Brain		No U, 1	2	A	N	F	F	0		7d_Female_20_DIP⍺_55810_tubGAL80_FruMB_fruFLP	B4-M9
DIP-⍺-GAL4; UAS>stop>GFP.Myr/UAS-FruMB; fruFLP/tub>GAL80>	Female	Brain		No U , 1	0	A	N	F	F	0		7d_Female_16_DIP⍺_55810_tubGAL80_FruMB_fruFLP	B4-N1
Ex4			Projection pattern in AbG of VNC	U shaped projection pattern & number of neuron body in SEG	Lateral assending projection in VLP	Square shaped projection pattern in VLP	M shaped projection pattern above AL in the Medial Part of Midbrain	Horizontal projection in the Medial Part of Midbrain	Protocerebral projection in SMP	mAL neuron
Genotype	Sex	Sample	Male-Like Pattern (M) vs No signal (X) vs Female-Like Pattern (F)	Presence of U shaped pattern (U), Absense of signal (X); Number (#) of neuron body	Number (#) of lateral assending projection	Absense (A) vs Presence (P) of Square shaped pattern, Number (#) of the corresponding neuron body	Presence of M shaped projection pattern (YES/NO)	Male-Like Pattern (M) vs No signal (X) vs Female-Like Pattern (F)	Male-Like Pattern (M) vs Female-Like Pattern (F)	Number (#) of mAL neuron		File Name	Blind Number
DIP-⍺-GAL4; UAS>stop>GFP.Myr/UAS-FruMC; fruFLP/tub>GAL80>	Male	VNC	M									7d_Male_5_VNC_DIP⍺_55810_tubGAL80_FruMC_fruFLP	B3-L1
DIP-⍺-GAL4; UAS>stop>GFP.Myr/UAS-FruMC; fruFLP/tub>GAL80>	Male	VNC	M									7d_Male_17_VNC_DIP⍺_55810_tubGAL80_FruMC_fruFLP	B3-M4
DIP-⍺-GAL4; UAS>stop>GFP.Myr/UAS-FruMC; fruFLP/tub>GAL80>	Male	VNC	M									7d_Male_13_VNC_DIP⍺_55810_tubGAL80_FruMC_fruFLP	B3-N7
DIP-⍺-GAL4; UAS>stop>GFP.Myr/UAS-FruMC; fruFLP/tub>GAL80>	Male	VNC	M									7d_Male_10_VNC_DIP⍺_55810_tubGAL80_FruMC_fruFLP	B4-C3
DIP-⍺-GAL4; UAS>stop>GFP.Myr/UAS-FruMC; fruFLP/tub>GAL80>	Male	VNC	N.A.									7d_Male_1_VNC_DIP⍺_55810_tubGAL80_FruMC_fruFLP	B4-H2
DIP-⍺-GAL4; UAS>stop>GFP.Myr/UAS-FruMC; fruFLP/tub>GAL80>	Male	VNC	X									7d_Male_12_VNC_DIP⍺_55810_tubGAL80_FruMC_fruFLP	B3-B8
DIP-⍺-GAL4; UAS>stop>GFP.Myr/UAS-FruMC; fruFLP/tub>GAL80>	Male	VNC	X									7d_Male_8_VNC_DIP⍺_55810_tubGAL80_FruMC_fruFLP	B3-C6
DIP-⍺-GAL4; UAS>stop>GFP.Myr/UAS-FruMC; fruFLP/tub>GAL80>	Male	VNC	X									7d_Male_2_VNC_DIP⍺_55810_tubGAL80_FruMC_fruFLP	B3-E5
DIP-⍺-GAL4; UAS>stop>GFP.Myr/UAS-FruMC; fruFLP/tub>GAL80>	Male	VNC	X									7d_Male_15_VNC_DIP⍺_55810_tubGAL80_FruMC_fruFLP	B3-I3
DIP-⍺-GAL4; UAS>stop>GFP.Myr/UAS-FruMC; fruFLP/tub>GAL80>	Male	VNC	X									7d_Male_7_VNC_DIP⍺_55810_tubGAL80_FruMC_fruFLP	B3-S2
DIP-⍺-GAL4; UAS>stop>GFP.Myr/UAS-FruMC; fruFLP/tub>GAL80>	Male	VNC	X									7d_Male_3_VNC_DIP⍺_55810_tubGAL80_FruMC_fruFLP	B4-B9
DIP-⍺-GAL4; UAS>stop>GFP.Myr/UAS-FruMC; fruFLP/tub>GAL80>	Male	VNC	X									7d_Male_11_VNC_DIP⍺_55810_tubGAL80_FruMC_fruFLP	B4-C9
DIP-⍺-GAL4; UAS>stop>GFP.Myr/UAS-FruMC; fruFLP/tub>GAL80>	Male	VNC	X									7d_Male_4_VNC_DIP⍺_55810_tubGAL80_FruMC_fruFLP	B4-H4
DIP-⍺-GAL4; UAS>stop>GFP.Myr/UAS-FruMC; fruFLP/tub>GAL80>	Male	VNC	X									7d_Male_6_VNC_DIP⍺_55810_tubGAL80_FruMC_fruFLP	B4-J5
DIP-⍺-GAL4; UAS>stop>GFP.Myr/UAS-FruMC; fruFLP/tub>GAL80>	Male	VNC	X									7d_Male_14_VNC_DIP⍺_55810_tubGAL80_FruMC_fruFLP	B4-J8
DIP-⍺-GAL4; UAS>stop>GFP.Myr/UAS-FruMC; fruFLP/tub>GAL80>	Male	VNC	X									7d_Male_16_VNC_DIP⍺_55810_tubGAL80_FruMC_fruFLP	B4-L6
DIP-⍺-GAL4; UAS>stop>GFP.Myr/UAS-FruMC; fruFLP/tub>GAL80>	Male	VNC	X									7d_Male_9_VNC_DIP⍺_55810_tubGAL80_FruMC_fruFLP	B4-N2
DIP-⍺-GAL4; UAS>stop>GFP.Myr/UAS-FruMC; fruFLP/tub>GAL80>	Female	VNC	F									7d_Female_5_vnc_⍺_55810_tubGAL80_FruMC_fruFLP_gfp488_FruM546	B3-W8
DIP-⍺-GAL4; UAS>stop>GFP.Myr/UAS-FruMC; fruFLP/tub>GAL80>	Female	VNC	F									7d_Female_8_VNC_DIP⍺_55810_tubGAL80_FruMC_fruFLP	B3-C8
DIP-⍺-GAL4; UAS>stop>GFP.Myr/UAS-FruMC; fruFLP/tub>GAL80>	Female	VNC	F									7d_Female_4_vnc_⍺_55810_tubGAL80_FruMC_fruFLP_gfp488_FruM546	B3-I2
DIP-⍺-GAL4; UAS>stop>GFP.Myr/UAS-FruMC; fruFLP/tub>GAL80>	Female	VNC	F									5d_Female_2_vnc_⍺_55810_tubGAL80_FruMC_fruFLP_gfp488_FruM546	B3-N3
DIP-⍺-GAL4; UAS>stop>GFP.Myr/UAS-FruMC; fruFLP/tub>GAL80>	Female	VNC	F									7d_Female_13_VNC_DIP⍺_55810_tubGAL80_FruMC_fruFLP	B3-Q1
DIP-⍺-GAL4; UAS>stop>GFP.Myr/UAS-FruMC; fruFLP/tub>GAL80>	Female	VNC	F									7d_Female_10_VNC_DIP⍺_55810_tubGAL80_FruMC_fruFLP	B3-Q7
DIP-⍺-GAL4; UAS>stop>GFP.Myr/UAS-FruMC; fruFLP/tub>GAL80>	Female	VNC	F									7d_Female_14_VNC_DIP⍺_55810_tubGAL80_FruMC_fruFLP	B4-E9
DIP-⍺-GAL4; UAS>stop>GFP.Myr/UAS-FruMC; fruFLP/tub>GAL80>	Female	VNC	F									7d_Female_16_VNC_DIP⍺_55810_tubGAL80_FruMC_fruFLP	B4-G5
DIP-⍺-GAL4; UAS>stop>GFP.Myr/UAS-FruMC; fruFLP/tub>GAL80>	Female	VNC	F									7d_Female_9_VNC_DIP⍺_55810_tubGAL80_FruMC_fruFLP	B4-H8
DIP-⍺-GAL4; UAS>stop>GFP.Myr/UAS-FruMC; fruFLP/tub>GAL80>	Female	VNC	F									6d_Female_3_vnc_⍺_55810_tubGAL80_FruMC_fruFLP_gfp488_FruM546	B4-M5
DIP-⍺-GAL4; UAS>stop>GFP.Myr/UAS-FruMC; fruFLP/tub>GAL80>	Female	VNC	F									7d_Female_15_VNC_DIP⍺_55810_tubGAL80_FruMC_fruFLP	B3-C3
DIP-⍺-GAL4; UAS>stop>GFP.Myr/UAS-FruMC; fruFLP/tub>GAL80>	Female	VNC	F									7d_Female_12_VNC_DIP⍺_55810_tubGAL80_FruMC_fruFLP	B4-I5
DIP-⍺-GAL4; UAS>stop>GFP.Myr/UAS-FruMC; fruFLP/tub>GAL80>	Female	VNC	X									7d_Female_11_VNC_DIP⍺_55810_tubGAL80_FruMC_fruFLP	B3-N4
DIP-⍺-GAL4; UAS>stop>GFP.Myr/UAS-FruMC; fruFLP/tub>GAL80>	Female	VNC	X									7d_Female_7_VNC_DIP⍺_55810_tubGAL80_FruMC_fruFLP	B3-U3
DIP-⍺-GAL4; UAS>stop>GFP.Myr/UAS-FruMC; fruFLP/tub>GAL80>	Female	VNC	X									7d_Female_6_vnc_⍺_55810_tubGAL80_FruMC_fruFLP_gfp488_FruM546	B4-G6
DIP-⍺-GAL4; UAS>stop>GFP.Myr/UAS-FruMC; fruFLP/tub>GAL80>	Female	VNC	X									5d_Female_1_vnc_⍺_55810_tubGAL80_FruMC_fruFLP_gfp488_FruM546	B4-K1
DIP-⍺-GAL4; UAS>stop>GFP.Myr/UAS-FruMC; fruFLP/tub>GAL80>	Male	Brain		X, 0	0	A	N	X	M	0		7d_Male_1_DIP⍺_55810_tubGAL80_FruMC_fruFLP_FruM546_gfp488_nc82633_20190308	B3-E7
DIP-⍺-GAL4; UAS>stop>GFP.Myr/UAS-FruMC; fruFLP/tub>GAL80>	Male	Brain		X, 0	0	A	N	X	M	0		5d_Male_11_⍺_55810_tubGAL80_FruMC_fruFLP_gfp488_FruM546	B3-I4
DIP-⍺-GAL4; UAS>stop>GFP.Myr/UAS-FruMC; fruFLP/tub>GAL80>	Male	Brain		X, 0	0	A	N	X	M	0		7d_Male_4_DIP⍺_55810_tubGAL80_FruMC_fruFLP_FruM546_gfp488_nc82633_20190308	B3-I9
DIP-⍺-GAL4; UAS>stop>GFP.Myr/UAS-FruMC; fruFLP/tub>GAL80>	Male	Brain		U, 0	0	A	N	X	M	1		7d_Male_5_DIP⍺_55810_tubGAL80_FruMC_fruFLP_FruM546_gfp488_nc82633_20190308	B3-J5
DIP-⍺-GAL4; UAS>stop>GFP.Myr/UAS-FruMC; fruFLP/tub>GAL80>	Male	Brain		X, 0	0	A	N	X	M	0		6d_Male_13_⍺_55810_tubGAL80_FruMC_fruFLP	B3-K1
DIP-⍺-GAL4; UAS>stop>GFP.Myr/UAS-FruMC; fruFLP/tub>GAL80>	Male	Brain		X, 0	0	A	N	X	M	0		6d_Male_9_DIP⍺_55810_tubGAL80_FruMC_fruFLP	B3-L4
DIP-⍺-GAL4; UAS>stop>GFP.Myr/UAS-FruMC; fruFLP/tub>GAL80>	Male	Brain		X, 0	0	A	N	X	M	0		6d_Male_12_⍺_55810_tubGAL80_FruMC_fruFLP	B3-L5
DIP-⍺-GAL4; UAS>stop>GFP.Myr/UAS-FruMC; fruFLP/tub>GAL80>	Male	Brain		U, 0	0	A	N	X	M	0		7d_Male_15_⍺_55810_tubGAL80_FruMC_fruFLP	B3-P3
DIP-⍺-GAL4; UAS>stop>GFP.Myr/UAS-FruMC; fruFLP/tub>GAL80>	Male	Brain		X, 0	0	A	N	X	M	0		7d_Male_17_⍺_55810_tubGAL80_FruMC_fruFLP	B3-Q2
DIP-⍺-GAL4; UAS>stop>GFP.Myr/UAS-FruMC; fruFLP/tub>GAL80>	Male	Brain		U, 0	0	A	N	X	M	0		6d_Male_8_DIP⍺_55810_tubGAL80_FruMC_fruFLP	B3-R9
DIP-⍺-GAL4; UAS>stop>GFP.Myr/UAS-FruMC; fruFLP/tub>GAL80>	Male	Brain		X, 0	0	A	N	X	M	0		7d_Male_3_DIP⍺_55810_tubGAL80_FruMC_fruFLP_FruM546_gfp488_nc82633_20190308	B3-W2
DIP-⍺-GAL4; UAS>stop>GFP.Myr/UAS-FruMC; fruFLP/tub>GAL80>	Male	Brain		X, 0	0	A	N	X	M	0		7d_Male_14_⍺_55810_tubGAL80_FruMC_fruFLP	B3-W7
DIP-⍺-GAL4; UAS>stop>GFP.Myr/UAS-FruMC; fruFLP/tub>GAL80>	Male	Brain		X, No U, 0	0	A	N	X	M	1		7d_Male_6_DIP⍺_55810_tubGAL80_FruMC_fruFLP_FruM546_gfp488_nc82633_20190308	B3-X9
DIP-⍺-GAL4; UAS>stop>GFP.Myr/UAS-FruMC; fruFLP/tub>GAL80>	Male	Brain		X, 0	0	A	N	X	M	0		7d_Male_7_DIP⍺_55810_tubGAL80_FruMC_fruFLP_FruM546_gfp488_nc82633_20190308	B4-C1
DIP-⍺-GAL4; UAS>stop>GFP.Myr/UAS-FruMC; fruFLP/tub>GAL80>	Male	Brain		X, 0	0	A	N	X	M	0		6d_Male_10_DIP⍺_55810_tubGAL80_FruMC_fruFLP	B4-G1
DIP-⍺-GAL4; UAS>stop>GFP.Myr/UAS-FruMC; fruFLP/tub>GAL80>	Male	Brain		X, 0	0	A	N	M	M	0		7d_Male_16_⍺_55810_tubGAL80_FruMC_fruFLP	B4-I1
DIP-⍺-GAL4; UAS>stop>GFP.Myr/UAS-FruMC; fruFLP/tub>GAL80>	Male	Brain		X, 0	0	A	N	X	M	0		7d_Male_2_DIP⍺_55810_tubGAL80_FruMC_fruFLP_FruM546_gfp488_nc82633_20190308	B4-I7
DIP-⍺-GAL4; UAS>stop>GFP.Myr/UAS-FruMC; fruFLP/tub>GAL80>	Female	Brain		No U , 1	0	A	N	F	M	0		7d_Female_5_DIP⍺_55810_tubGAL80_FruMC_fruFLP_FruM546_gfp488_nc82633_20190308	B3-B4
DIP-⍺-GAL4; UAS>stop>GFP.Myr/UAS-FruMC; fruFLP/tub>GAL80>	Female	Brain		No U, 1	0	A	N	X	M	0		5d_Female_15_DIP⍺_55810_tubGAL80_FruMC_fruFLP_FruM546_gfp488_nc82633_20190308	B3-C1
DIP-⍺-GAL4; UAS>stop>GFP.Myr/UAS-FruMC; fruFLP/tub>GAL80>	Female	Brain		No U , 2	1	A	N	X	F	0		7d_Female_1_DIP⍺_55810_tubGAL80_FruMC_fruFLP_FruM546_gfp488_nc82633_20190308	B3-C2
DIP-⍺-GAL4; UAS>stop>GFP.Myr/UAS-FruMC; fruFLP/tub>GAL80>	Female	Brain		No U, 1	1	A	N	F	F	0		7d_Female_3_DIP⍺_55810_tubGAL80_FruMC_fruFLP_FruM546_gfp488_nc82633_20190308	B3-I1
DIP-⍺-GAL4; UAS>stop>GFP.Myr/UAS-FruMC; fruFLP/tub>GAL80>	Female	Brain		U, 1	0	A	N	F	F	0		5d_Female_14_DIP⍺_55810_tubGAL80_FruMC_fruFLP_FruM546_gfp488_nc82633_20190308	B3-K5
DIP-⍺-GAL4; UAS>stop>GFP.Myr/UAS-FruMC; fruFLP/tub>GAL80>	Female	Brain		No U , 2	0	A	N	X	F	0		7d_Female_7_DIP⍺_55810_tubGAL80_FruMC_fruFLP_FruM546_gfp488_nc82633_20190308	B3-M5
DIP-⍺-GAL4; UAS>stop>GFP.Myr/UAS-FruMC; fruFLP/tub>GAL80>	Female	Brain		U, 0	0	A	N	X	M	0		7d_Female_18_DIP⍺_55810_tubGAL80_FruMC_fruFLP	B3-M8
DIP-⍺-GAL4; UAS>stop>GFP.Myr/UAS-FruMC; fruFLP/tub>GAL80>	Female	Brain		No U , 1	0	A	N	X	M	2		7d_Female_17_DIP⍺_55810_tubGAL80_FruMC_fruFLP	B3-O5
DIP-⍺-GAL4; UAS>stop>GFP.Myr/UAS-FruMC; fruFLP/tub>GAL80>	Female	Brain		X, No U, 0	0	A	N	F	F	1		7d_Female_19_DIP⍺_55810_tubGAL80_FruMC_fruFLP	B3-P4
DIP-⍺-GAL4; UAS>stop>GFP.Myr/UAS-FruMC; fruFLP/tub>GAL80>	Female	Brain		U, 1	0	A	N	X	F	0		7d_Female_11_DIP⍺_55810_tubGAL80_FruMC_fruFLP_FruM546_gfp488_nc82633_20190308	B3-S5
DIP-⍺-GAL4; UAS>stop>GFP.Myr/UAS-FruMC; fruFLP/tub>GAL80>	Female	Brain		No U, 1	0	A	N	X	F	0		7d_Female_4_DIP⍺_55810_tubGAL80_FruMC_fruFLP_FruM546_gfp488_nc82633_20190308	B3-U4
DIP-⍺-GAL4; UAS>stop>GFP.Myr/UAS-FruMC; fruFLP/tub>GAL80>	Female	Brain		No U, 1	0	A	N	X	F	0		6d_Female_12_DIP⍺_55810_tubGAL80_FruMC_fruFLP_FruM546	B3-X2
DIP-⍺-GAL4; UAS>stop>GFP.Myr/UAS-FruMC; fruFLP/tub>GAL80>	Female	Brain		No U, 0	0	A	N	X	F	0		7d_Female_10_DIP⍺_55810_tubGAL80_FruMC_fruFLP_FruM546_gfp488_nc82633_20190308	B3-Y9
DIP-⍺-GAL4; UAS>stop>GFP.Myr/UAS-FruMC; fruFLP/tub>GAL80>	Female	Brain		No U , 1	0	A	N	X	F	0		5d_Female_16_DIP⍺_55810_tubGAL80_FruMC_fruFLP_FruM546_gfp488_nc82633_20190308	B3-Z4
DIP-⍺-GAL4; UAS>stop>GFP.Myr/UAS-FruMC; fruFLP/tub>GAL80>	Female	Brain		No U , 1	0	A	N	X	F	0		7d_Female_6_DIP⍺_55810_tubGAL80_FruMC_fruFLP_FruM546_gfp488_nc82633_20190308	B4-A3
DIP-⍺-GAL4; UAS>stop>GFP.Myr/UAS-FruMC; fruFLP/tub>GAL80>	Female	Brain		U, 0	0	A	N	X	F	0		7d_Female_9_DIP⍺_55810_tubGAL80_FruMC_fruFLP_FruM546_gfp488_nc82633_20190308	B4-B3
DIP-⍺-GAL4; UAS>stop>GFP.Myr/UAS-FruMC; fruFLP/tub>GAL80>	Female	Brain		U, 1	0	A	N	X	F	1		7d_Female_2_DIP⍺_55810_tubGAL80_FruMC_fruFLP_FruM546_gfp488_nc82633_20190308	B4-D7
DIP-⍺-GAL4; UAS>stop>GFP.Myr/UAS-FruMC; fruFLP/tub>GAL80>	Female	Brain		No U, 0	0	P, 1	N	F	F	0		5d_Female_13_DIP⍺_55810_tubGAL80_FruMC_fruFLP_FruM546_gfp488_nc82633_20190308	B4-E1
DIP-⍺-GAL4; UAS>stop>GFP.Myr/UAS-FruMC; fruFLP/tub>GAL80>	Female	Brain		U, 2	0	A	N	M	F	0		7d_Female_8_DIP⍺_55810_tubGAL80_FruMC_fruFLP_FruM546_gfp488_nc82633_20190308	B4-J2

## Sheet: 5. Tables and Statistics
	I. Superior Medial Protocerebrum (SMP)				II. Medial Part of Midbrain								III. Lateral Part of Midbrain (Ventrolateral Protocerebrum (VLP))				IV. Suboesophageal Ganglion (SEG)				V. Abdominal Ganglion of VNC (AbG)
	Male-like Pattern		Female-like Pattern		Presence of "M" shaped Projection		Male-like Horizontal Projection		Absence of Horizontal Projection		Female-like Horizontal Projection		Presence of "Square" Shaped Pattern		Presence of Lateral Projection		Presence of "U" shaped Projection		Presence of Neuron Body		Male-like Pattern		No Signal		Female-like Pattern
	Male	Female	Male	Female	Male	Female	Male	Female	Male	Female	Male	Female	Male	Female	Male	Female	Male	Female	Male	Female	Male	Female	Male	Female	Male	Female
Control	17|18	0|16	1|18	16|16	6|18	0|16	17|18	0|16	0|18	0|16	1|18	16|16	7|18	13|16	4|18	2|16	17|18	16|16	3|18	10|16	20|20	1|18	0|20	1|18	0|20	16|18
fru△C	9|20	2|18	11|20	16|18	6|20	1|18	18|20	0|18	0|20	0|18	2|20	18|18	7|20	18|18	11|20	4|18	20|20	18|18	7|20	10|18	15|15	0|18	0|15	2|18	0|15	16|18
TraF	0|14	1|16	14|14	15|16	4|14	0|16	7|14	2|16	3|14	5|16	4|14	9|16	10|14	7|16	8|15	8|16	14|15	15|16	6|15	11|16	8|16	0|16	3|16	1|16	5|16	15|16
FruMA	17|18	2|16	1|18	14|16	7|18	0|16	15|18	1|15	1|18	0|15	2|18	14|15	0|18	11|16	1|18	1|16	15|18	13|16	3|18	8|16	18|20	2|13	2|20	1|13	0|20	10|13
FruMB	16|16	0|15	0|16	15|15	15|16	0|15	16|16	0|15	0|16	0|15	0|16	15|15	0|16	8|15	1|16	12|15	0|16	13|15	1|16	12|15	11|15	3|16	3|15	1|16	1|15	12|16
FruMC	14|16	1|15	2|16	14|15	0|16	0|15	0|16	0|15	16|16	8|15	0|16	7|15	3|16	6|15	3|16	1|15	0|16	7|15	0|16	5|15	9|16	1|16	7|16	1|16	0|16	14|16
Control >tubGAL80>	14|15	0|15	1|15	15|15	9|15	1|15	14|15	0|15	1|15	0|15	0|15	15|15	0|15	2|15	1|15	0|15	3|15	1|15	1|15	13|15	9|16	0|17	7|16	3|17	0|16	14|17
TraF tub>GAL80>	13|18	1|18	5|18	17|18	14|19	0|19	18|19	1|19	0|19	1|19	1|19	17|19	3|19	3|19	17|19	8|19	7|18	5|19	3|19	17|19	2|18	0|18	10|18	4|18	6|18	14|18
FruMA tub>GAL80>	17|17	7|18	0|17	11|18	0|17	0|19	1|17	0|19	16|17	6|19	0|17	13|19	0|17	0|19	0|17	1|19	0|17	3|18	0|17	11|18	0|18	1|15	18|18	13|15	0|18	1|15
FruMB tub>GAL80>	15|16	0|23	1|16	23|23	11|16	0|23	13|16	1|23	3|16	0|23	0|16	22|23	0|16	8|23	1|16	11|23	2|16	4|23	2|16	21|23	8|15	0|15	7|15	3|15	0|15	12|15
FruMC tub>GAL80>	17|17	4|19	0|17	15|19	0|17	0|19	1|17	1|19	16|17	13|19	0|17	5|19	0|17	1|19	0|17	2|19	3|17	6|19	0|17	14|19	4|16	0|16	12|16	4|16	0|16	12|16
* Meaning of the numbers in the table: (Number of samples that have the corresponding GFP pattern)/ (Total number of samples)
	I. Superior Medial Protocerebrum (SMP)				II. Medial Part of Midbrain								III. Lateral Part of Midbrain (Ventrolateral Protocerebrum (VLP))				IV. Suboesophageal Ganglion (SEG)				V. Abdominal Ganglion of VNC (AbG)
	Male-like Pattern		Female-like Pattern		Presence of "M" shaped Projection		Male-like Horizontal Projection		Absence of Horizontal Projection		Female-like Horizontal Projection		Presence of "Square" Shaped Pattern		Presence of Lateral Projection		Presence of "U" shaped Projection		Presence of Neuron Body		Male-like Pattern		No Signal		Female-like Pattern
	Male	Female	Male	Female	Male	Female	Male	Female	Male	Female	Male	Female	Male	Female	Male	Female	Male	Female	Male	Female	Male	Female	Male	Female	Male	Female
Control	17	0	1	16	6	0	17	0	0	0	1	16	7	13	4	2	17	16	3	10	20	1	0	1	0	16
fru△C	9	2	11	16	6	1	18	0	0	0	2	18	7	18	11	4	20	18	7	10	15	0	0	2	0	16
TraF	0	1	14	15	4	0	7	2	3	5	4	9	10	7	8	8	14	15	6	11	8	0	3	1	5	15
FruMA	17	2	1	14	7	0	15	1	1	0	2	14	0	11	1	1	15	13	3	8	18	2	2	1	0	10
FruMB	16	0	0	15	15	0	16	0	0	0	0	15	0	8	1	12	0	13	1	12	11	3	3	1	1	12
FruMC	14	1	2	14	0	0	0	0	16	8	0	7	3	6	3	1	0	7	0	5	9	1	7	1	0	14
Control >tubGAL80>	14	0	1	15	9	1	14	0	1	0	0	15	0	2	1	0	3	1	1	13	9	0	7	3	0	14
TraF tub>GAL80>	13	1	5	17	14	0	18	1	0	1	1	17	3	3	17	8	7	5	3	17	2	0	10	4	6	14
FruMA tub>GAL80>	17	7	0	11	0	0	1	0	16	6	0	13	0	0	0	1	0	3	0	11	0	1	18	13	0	1
FruMB tub>GAL80>	15	0	1	23	11	0	13	1	3	0	0	22	0	8	1	11	2	4	2	21	8	0	7	3	0	12
FruMC tub>GAL80>	17	4	0	15	0	0	1	1	16	13	0	5	0	1	0	2	3	6	0	14	4	0	12	4	0	12
* Meaning of the numbers in the table: Number of samples that have the corresponding GFP pattern.
Male Samples
Male Samples	I. SMP		II. Medial Part of Midbrain				III. VLP		IV. SEG		V. AbG				p ≦ 0.05	p is > but close to 0.05
	Protocerebral Projection		"M" shaped Projection Pattern	Horizontal Projection			"Square"shaped Projection Pattern	Lateral Ascending Projection	"U"shaped Projection Pattern	Neuron Bodies	Patterns within AbG				Fisher's Exact test within male samples	Protocerebral Projection in SMP		"M"shaped Projection Pattern	Horizontal Projection in the Medial Part of Midbrain			"Square"shaped Projection Pattern in VLP	Lateral Ascending Projection in VLP	"U"shaped Projection Pattern in SEG	Neuron Bodies in SEG	Patterns within AbG
	Male-like Pattern	Female-like Pattern	Presence of M Projection	Male-like Horizontal Projection	Absence of Horizontal Projection	Female-like Horizontal Projection	Presence of Square pattern	Presence of Lateral Projection	Presence of U Projection	Presence of Neuron Bodies	Male-like Pattern	No Signal	Female-like Pattern
Control	17	1	6|18	17	0	1	7|18	4|18	17|18	3|18	20	0	0		Control
fru△C	9	11	6|20	18	0	2	7|20	11|20	20|20	7|20	15	0	0		fru△C	0.00140511		1	1			1	0.05212	0.473684	0.277846	1
TraF	0	14	4|14	7	3	4	10|14	8|15	14|15	6|15	8	3	5		TraF	3.18e-08		1	0.00893215			0.0869742	0.0827191	1	0.239478	0.000425309
FruMA	17	1	7|18	15	1	2	0|18	1|18	15|18	3|18	18	2	0		FruMA	1		0.744338	0.602597			0.00762463	0.191558	0.602597	1	0.487179
FruMB	16	0	15|16	16	0	0	0|16	1|16	0|16	1|16	11	3	1		FruMB	1		0.000365213	1			0.00804221	0.340176	1.54e-08	0.604106	0.0260695
FruMC	14	2	0|16	0	16	0	3|16	3|16	0|16	0|16	9	7	0		FruMC	0.590909		0.0197575	4.54e-10			0.270058	1	1.54e-08	0.229947	0.00137044
Control >tubGAL80>	14	1	9|15	14	1	0	0|15	1|15	3|15	1|15	9	7	0		Control >tubGAL80>
TraF tub>GAL80>	13	5	14|19	18	0	1	3|19	17|19	7|18	3|19	2	10	6		TraF tub>GAL80>	0.186122		0.474805	0.695187			0.237968	1.6121e-06	0.282799	0.612839	0.00268049
FruMA tub>GAL80>	17	0	0|17	1	16	0	0|17	0|17	0|17	0|17	0	18	0		FruMA tub>GAL80>	0.46875		0.000178439	6.93e-07			1	0.46875	0.0917339	0.46875	0.000218107
FruMB tub>GAL80>	15	1	11|16	13	3	0	0|16	1|16	2|16	2|16	8	7	0		FruMB tub>GAL80>	1		0.715987	0.599555			1	1	0.653936	1	1
FruMC tub>GAL80>	17	0	0|17	1	16	0	0|17	0|17	3|17	0|17	4	12	0		FruMC tub>GAL80>	0.46875		0.000178439	6.93e-07			1	0.46875	1	0.46875	0.148884
Female Samples
Female Samples	I. SMP		II. Medial Part of Midbrain				III. VLP		IV. SEG		V. AbG				p ≦ 0.05	p is > but close to 0.05
	Protocerebral Projection		"M"shaped Projection Pattern	Horizontal Projection			"Square"shaped Projection Pattern	Lateral Ascending Projection	"U"shaped Projection Pattern	Neuron Bodies	Patterns within AbG				Fisher's Exact test within female samples	Protocerebral Projection in SMP		"M"shaped Projection Pattern	Horizontal Projection in the Medial Part of Midbrain			"Square"shaped Projection Pattern in VLP	Lateral Ascending Projection in VLP	"U"shaped Projection Pattern in SEG	Neuron Bodies in SEG	Patterns within AbG
	Male-like Pattern	Female-like Pattern	Presence of M Projection	Male-like Horizontal Projection	Absence of Horizontal Projection	Female-like Horizontal Projection	Presence of Square pattern	Presence of Lateral Projection	Presence of U Projection	Presence of Neuron Bodies	Male-like Pattern	No Signal	Female-like Pattern
Control	0	16	0|16	0	0	16	13|16	2|16	16|16	10|16	1	1	16		Control
fru△C	2	16	1|18	0	0	18	18|18	4|18	18|18	10|18	0	2	16		fru△C	0.486631		1	1			0.0935829	0.660229	1	0.738453	1
TraF	1	15	0|16	2	5	9	7|16	8|16	15|16	11|16	0	1	15		TraF	1		1	0.00679768			0.0658929	0.0538021	1	1	1
FruMA	2	14	0|16	1	0	14	11|16	1|16	13|16	8|16	2	1	10		FruMA	0.483871		1	0.483871			0.685082	1	0.225806	0.722393	0.775242
FruMB	0	15	0|15	0	0	15	8|15	12|15	13|15	12|15	3	1	12		FruMB	1		1	1			0.135052	0.000244417	0.225806	0.433148	0.650521
FruMC	1	14	0|15	0	8	7	6|15	1|15	7|15	5|15	1	1	14		FruMC	0.483871		1	0.000815721			0.0290081	1	0.000815721	0.155613	1
Control >tubGAL80>	0	15	1|15	0	0	15	2|15	0|15	1|15	13|15	0	3	14		Control >tubGAL80>
TraF tub>GAL80>	1	17	0|19	1	1	17	3|19	8|19	5|19	17|19	0	4	14		TraF tub>GAL80>	1		0.441176	1			1	0.0045173	0.19601	1	1
FruMA tub>GAL80>	7	11	0|19	0	6	13	0|19	1|19	3|18	11|18	1	13	1		FruMA tub>GAL80>	0.00895566		0.441176	0.0238954			0.187166	1	0.607405	0.133583	2.16926e-05
FruMB tub>GAL80>	0	23	0|23	1	0	22	8|23	11|23	4|23	21|23	0	3	12		FruMB tub>GAL80>	1		0.394737	1			0.258807	0.00223446	0.629529	1	1
FruMC tub>GAL80>	4	15	0|19	1	13	5	1|19	2|19	6|19	14|19	0	4	12		FruMC tub>GAL80>	0.113011		0.441176	1.77826e-05			0.571357	0.491979	0.103892	0.426304	0.688018
