# Supplementary material for: Investigation of Drosophila fruitless neurons that express Dpr/DIP cell adhesion molecules
Source: eLife. 2021 Feb 22;10:e63101. doi: 10.7554/eLife.63101 (PMC7972454; doi:10.7554/eLife.63101)
Supplement: Source data 5. — Data tables of quantification of confocal data of RNAi and dpr/DIP overexpression analyses, in four sheets as follows: 1. READ ME: This first sheet is to explain the following four tabs. 2. DIP-α- and DIPδ-GAL4 screen: This sheet contains all genotypes tested in the initial RNAi/overexpressor screen using both DIP-α and DIP-δ as the GAL4 driver. The controls are bolded. N = 5. This sheet contains the following columns: Genotype: Contains an abbreviated genotype, including the GAL4 driver and dpr/DIP knocked-down (RNAi) or overexpressed (UAS). Although not explicitly stated, all genotypes also contained a UAS > stop > GFP.Myr transgene as well as a fruFLP transgene. Temperature Raised: The RNAi crosses were set up at 25°C where the flies were allowed to lay eggs for 2–3 days. Then, the parents were turned into a new vial, and the eggs were raised at 29°C. This was done to ensure that the RNAi was fully functional, as it was found to be less effective at 25°C. All overexpressor flies were raised at 25°C, as noted. Difficulty getting males: This was only an issue with the RNAi crosses at 29°C. Some of these crosses did not produce males at all, or produced far fewer males than females. Of note, these crosses always produced females with ease. Assayed at 16–24 hr: ‘Yes’ in this column indicated that five replicates per sex were dissected and stained as 16–24 hr adults. Assayed at 4–7 days: ‘Yes’ in this column indicated that five replicates per sex were dissected and stained as 4- to 7-day adults. Phenotype: Any phenotype observed when comparing the RNAi with its respective control. Notes: Relevant notes. 3.DIP-α-GAL4; DIP-ε-RNAi: Of all the genotypes tested, this was the only one to show a robust phenotype. The czi files were scored blind for conditions with and without tub>GAL80>. n = 20. A table summarizing the statistics is to the right of the raw data. See below for a more detailed description of how these phenotypes were scored. 4. UAS DIP-α screen: Although not e [file elife-63101-data5.xlsx]

## Sheet: DIP-α- & DIPδ-GAL4 screen
Genotype	Temperature raised (°C)	Difficulty getting males?	Assayed at 16-24 hr?	Asayed at 4-7 d?	Phenotype?	Notes
RNAi
DIP-α-GAL4; RFP-RNAi	29		Yes	Yes	Control for DIP-α-GAL4 non-tubGAL80 genotypes
DIP-α-GAL4; tubGAL80/+	29			Yes	Control for DIP-α-GAL4 tubGAL80 genotypes	Dipα-GAL4; tubgal80 crossed to w;cs
DIP-α-GAL4; tubGAL80; RFP-RNAi	29	Yes, males incredibly rare		Yes for females n=20, could only get n=10 for males
DIP-α-GAL4; DIP-β-RNAi	29	Yes	Yes	Yes
DIP-α-GAL4; DIP-ε-RNAi	29		Yes	Yes	SOG pruned in RNAi males, protocerebral projection altered in females
DIP-α-GAL4; DIP-ε-RNAi; tubGAL80	29			Yes
DIP-α-GAL4; DIP-η-RNAi	29		Yes	Yes
DIP-α-GAL4; DIP-ι-RNAi	29	Yes	Yes	Yes
DIP-α-GAL4; DIP-θ-RNAi	29		Yes	Yes	Initially thought males looked more pruned? Increased N to 20 and found no significant phenotype
DIP-α-GAL4; DIP-θ-RNAi; tubGAL80	29	Yes	Yes	Yes
DIP-α-GAL4; DIP-ζ-RNAi	29	Yes	Yes	Yes
DIP-α-GAL4; dpr5-RNAi	29		Yes	Yes
DIP-α-GAL4; dpr5-RNAi; tubGAL80	29	Yes	Yes	Yes
DIP-α-GAL4; dpr10-RNAi	29		Yes	Yes
DIP-α-GAL4; dpr12-RNAi	29	Yes	Yes	Yes
DIP-δ-GAL4; rfp-RNAi	29		Yes	Yes	Control for DIP-δ-GAL4 non-tubGAL80 genotypes
DIP-δ-GAL4; DIP-α-RNAi	29			Yes
DIP-δ-GAL4; DIP-β-RNAi	29		Yes	Yes
DIP-δ-GAL4; DIP-ε-RNAi	29		Yes	Yes
DIP-δ-GAL4; DIP-η-RNAi	29		Yes	Yes
DIP-δ-GAL4; DIP-ι-RNAi	29		Yes	Yes
DIP-δ-GAL4; DIP-θ-RNAi	29		Yes	Yes
DIP-δ-GAL4; DIP-ζ-RNAi	29		Yes	Yes
DIP-δ-GAL4; dpr5-RNAi	29		Yes	Yes
DIP-δ-GAL4; dpr10-RNAi	29		Yes	Yes
DIP-δ-GAL4; dpr12-RNAi	29		Yes	Yes
Overexpressor
DIP-α-GAL4;;;	25		Yes	Yes	Control for DIP-α-GAL4 overexpressor genotypes	DIPα-GAL4::: crossed to w;cs
DIP-α-GAL4; UAS-DIP-α	25		Yes	Yes
DIP-α-GAL4; UAS-DIP-ε	25		Yes	Yes
DIP-α-GAL4; UAS-DIP-γ	25		Yes	Yes
DIP-α-GAL4; UAS-DIP-ι	25		Yes	Yes
DIP-α-GAL4; UAS-dpr1	25		Yes	Yes
DIP-α-GAL4; UAS-dpr4	25		Yes	Yes
DIP-α-GAL4; UAS-dpr6	25		Yes	Yes
DIP-α-GAL4; UAS-dpr10	25		Yes	Yes
DIP-α-GAL4; UAS-dpr18	25		Yes	Yes
DIP-δ-GAL4;;;	25		Yes	Yes	Control for DIP-δ-GAL4 overexpressorgenotypes	DIP-δ-GAL4::: crossed to w;cs
DIP-δ-GAL4; UAS-DIP-ε	25		Yes	Yes
DIP-δ-GAL4; UAS-DIP-γ	25		Yes	Yes
DIP-δ-GAL4; UAS-DIP-ι	25		Yes	Yes
DIP-δ-GAL4; UAS-dpr10	25		Yes	Yes

## Sheet: DIP-α-GAL4; DIP-ε-RNAi
A key to describe how phenotypes were scored is provided at the bottom of the READ ME tab and below all data on this tab.	File name/ Genotype	Blinded Image (Internal lab notation)	Descending neurons (0,1,2)	U neuron (P/A)		Enhancement of protocerebral projections (P/A)	Three-pronged protocerebral projections (P/A)		Medial projecting neurons (P/A)		Horizontal neurons (P/A)	Enhanced horizontal neurons (P/A)
	4-7dDIPalphaGAL4_DIPepsilonRNAi_55810_FruFLP female 10	B9	0	no		yes	yes		yes		yes	yes		P-value from Fisher's Exact test between control (-) and it's respective knock-down.
	4-7dDIPalphaGAL4_DIPepsilonRNAi_55810_FruFLP female 11	D8	1	yes		yes	yes		yes		yes	yes
	4-7dDIPalphaGAL4_DIPepsilonRNAi_55810_FruFLP female 12	C1	0	no		yes	yes		yes		yes	yes		MALE	Presence of descending neurons	Presence of U neuron	Enhancement of protocerebral projections	Presence of horizontal projections	Enhancement of lateral projections
	4-7dDIPalphaGAL4_DIPepsilonRNAi_55810_FruFLP female 15	C7	0	no		yes	yes		yes		yes	no		DIP-α-GAL4; RFP-RNAi	-	-	-	-	-
	4-7dDIPalphaGAL4_DIPepsilonRNAi_55810_FruFLP female 16	E4	1	yes		yes	yes		yes		yes	no		DIP-α-GAL4; DIP-ε-RNAi	1.939E-05 ***	1.664E-05 ***	1	0.3406	0.2308
	4-7dDIPalphaGAL4_DIPepsilonRNAi_55810_FruFLP female 17	B1	0	no		yes	yes		yes		no	no
	4-7dDIPalphaGAL4_DIPepsilonRNAi_55810_FruFLP female 19	A4	0	no		yes	yes		yes		no	no		DIP-α-GAL4; tubgal80	-	-	-	-	-
	4-7dDIPalphaGAL4_DIPepsilonRNAi_55810_FruFLP female 2	A3	1	yes		yes	yes		yes		yes	yes		DIP-α-GAL4; DIP-ε-RNAi, tubgal80	1	1	1	1	1
	4-7dDIPalphaGAL4_DIPepsilonRNAi_55810_FruFLP female 21	D6	1	yes		yes	yes		yes		yes	no
	4-7dDIPalphaGAL4_DIPepsilonRNAi_55810_FruFLP female 24	C9	1	yes		yes	yes		yes		yes	yes
	4-7dDIPalphaGAL4_DIPepsilonRNAi_55810_FruFLP female 25	C6	2	yes		yes	yes		yes		yes	yes		FEMALE	Presence of descending neurons	Presence of U neuron	Enhancement of protocerebral projections	Presence of horizontal projections	Enhancement of lateral projections
	4-7dDIPalphaGAL4_DIPepsilonRNAi_55810_FruFLP female 26	D3	1	yes		yes	yes		yes		yes	yes		DIP-α-GAL4; RFP-RNAi	-	-	-	-	-
	4-7dDIPalphaGAL4_DIPepsilonRNAi_55810_FruFLP female 27	C2	0	no		yes	yes		yes		no	no		DIP-α-GAL4; DIP-ε-RNAi	0.04074 *	0.09585	1.451E-11 ***	1	1
	4-7dDIPalphaGAL4_DIPepsilonRNAi_55810_FruFLP female 29	Bp_B5	0	no		yes	no		yes		yes	no
	4-7dDIPalphaGAL4_DIPepsilonRNAi_55810_FruFLP female 30	Bp_C6	0	no		yes	no		yes		yes	no		DIP-α-GAL4; tubgal80	-	-	-	-	-
	4-7dDIPalphaGAL4_DIPepsilonRNAi_55810_FruFLP female 31	Bp_C8	1	yes		yes	no		yes		yes	no		DIP-α-GAL4; DIP-ε-RNAi, tubgal80	1	0.5006	5.818E-09 ***	0.0436 *	0.111
	4-7dDIPalphaGAL4_DIPepsilonRNAi_55810_FruFLP female 32	Bp_B9	1	yes		yes	no		yes		yes	no
	4-7dDIPalphaGAL4_DIPepsilonRNAi_55810_FruFLP female 34	Bp_C9	2	yes		yes	no		yes		yes	no		*P < 0.05, **P < 0.01, ***P < 0.001
	4-7dDIPalphaGAL4_DIPepsilonRNAi_55810_FruFLP female 4	B4	0	no		yes	yes		yes		yes	yes
	4-7dDIPalphaGAL4_DIPepsilonRNAi_55810_FruFLP female 8	A6	0	no		yes	yes		yes		no	no
	4-7dDIPalphaGAL4_DIPepsilonRNAi_55810_FruFLP male 10	G2	0	no		no	no		yes		no	no
	4-7dDIPalphaGAL4_DIPepsilonRNAi_55810_FruFLP male 14	H1	0	no		no	no		yes		yes	no
	4-7dDIPalphaGAL4_DIPepsilonRNAi_55810_FruFLP male 19	F3	0	no		no	no		yes		yes	no
	4-7dDIPalphaGAL4_DIPepsilonRNAi_55810_FruFLP male 20	G4	0	no		no	no		yes		yes	no
	4-7dDIPalphaGAL4_DIPepsilonRNAi_55810_FruFLP male 21	G5	0	no		no	no		yes		no	no
	4-7dDIPalphaGAL4_DIPepsilonRNAi_55810_FruFLP male 24	J6	0	no		no	no		yes		no	no
	4-7dDIPalphaGAL4_DIPepsilonRNAi_55810_FruFLP male 25	F5	0	no		no	no		yes		yes	no
	4-7dDIPalphaGAL4_DIPepsilonRNAi_55810_FruFLP male 26	E6	0	no		no	no		yes		no	no
	4-7dDIPalphaGAL4_DIPepsilonRNAi_55810_FruFLP male 27	Bp_C1	1	yes		no	no		yes		no	no
	4-7dDIPalphaGAL4_DIPepsilonRNAi_55810_FruFLP male 3	G8	0	no		no	no		yes		no	no
	4-7dDIPalphaGAL4_DIPepsilonRNAi_55810_FruFLP male 30	Bp_A8	0	yes		no	no		yes		no	no
	4-7dDIPalphaGAL4_DIPepsilonRNAi_55810_FruFLP male 33	Bp_A6	0	no		no	no		yes		no	no
	4-7dDIPalphaGAL4_DIPepsilonRNAi_55810_FruFLP male 34	Bp_A3	0	no		no	no		yes		yes	no
	4-7dDIPalphaGAL4_DIPepsilonRNAi_55810_FruFLP male 35	Bp_A7	2	yes		no	no		yes		no	no
	4-7dDIPalphaGAL4_DIPepsilonRNAi_55810_FruFLP male 36	Bp_A9	0	no		no	no		yes		yes	no
	4-7dDIPalphaGAL4_DIPepsilonRNAi_55810_FruFLP male 38	Bp_B3	0	no		no	no		yes		yes	no
	4-7dDIPalphaGAL4_DIPepsilonRNAi_55810_FruFLP male 39	Bp_A2	0	no		no	no		yes		yes	no
	4-7dDIPalphaGAL4_DIPepsilonRNAi_55810_FruFLP male 40	Bp_C2	2	yes		no	no		yes		yes	no
	4-7dDIPalphaGAL4_DIPepsilonRNAi_55810_FruFLP male 8	E9	0	no		no	yes		yes		yes	no
	4-7dDIPalphaGAL4_DIPepsilonRNAi_55810_FruFLP male 9	J2	0	no		no	no		yes		yes	no
	4-7dDIPalphaGAL4_rfpRNAi_55810_FruFLP female	A1	1	yes		no	yes		yes		yes	no
	4-7dDIPalphaGAL4_rfpRNAi_55810_FruFLP female 10	E2	1	yes		no	no		yes		yes	no
	4-7dDIPalphaGAL4_rfpRNAi_55810_FruFLP female 11	B5	1	yes		no	no		yes		yes	no
	4-7dDIPalphaGAL4_rfpRNAi_55810_FruFLP female 13	C8	1	yes		no	no		yes		yes	yes
	4-7dDIPalphaGAL4_rfpRNAi_55810_FruFLP female 14	E3	1	yes		no	yes		yes		yes	yes
	4-7dDIPalphaGAL4_rfpRNAi_55810_FruFLP female 17	A2	2	yes		no	no		yes		yes	no
	4-7dDIPalphaGAL4_rfpRNAi_55810_FruFLP female 22	D4	1	yes		no	no		yes		yes	yes
	4-7dDIPalphaGAL4_rfpRNAi_55810_FruFLP female 23	B8	1	yes		no	no		yes		yes	no
	4-7dDIPalphaGAL4_rfpRNAi_55810_FruFLP female 24	C4	1	yes		no	yes		yes		yes	yes
	4-7dDIPalphaGAL4_rfpRNAi_55810_FruFLP female 26	E1	1	yes		no	no		yes		yes	yes
	4-7dDIPalphaGAL4_rfpRNAi_55810_FruFLP female 28	D5	1	yes		no	no		yes		yes	yes
	4-7dDIPalphaGAL4_rfpRNAi_55810_FruFLP female 29	C5	2	yes		no	yes		yes		yes	no
	4-7dDIPalphaGAL4_rfpRNAi_55810_FruFLP female 3	A8	0	no		no	no		yes		no	no
	4-7dDIPalphaGAL4_rfpRNAi_55810_FruFLP female 31	Bp_C4	1	yes		no	no		yes		yes	no
	4-7dDIPalphaGAL4_rfpRNAi_55810_FruFLP female 32	Bp_B6	2	yes		no	no		yes		yes	yes
	4-7dDIPalphaGAL4_rfpRNAi_55810_FruFLP female 33	Bp_C7	1	yes		no	no		yes		yes	no
	4-7dDIPalphaGAL4_rfpRNAi_55810_FruFLP female 35	Bp_C5	1	no		no	no		yes		yes	no
	4-7dDIPalphaGAL4_rfpRNAi_55810_FruFLP female 6	D1	0	no		no	no		yes		no	no
	4-7dDIPalphaGAL4_rfpRNAi_55810_FruFLP female 8	C3	0	no		no	no		yes		no	no
	4-7dDIPalphaGAL4_rfpRNAi_55810_FruFLP female 9	Bp_D2	1	yes		no	no		yes		yes	yes
	4-7dDIPalphaGAL4_rfpRNAi_55810_FruFLP male 12	F9	2	yes		no	no		yes		yes	no
	4-7dDIPalphaGAL4_rfpRNAi_55810_FruFLP male 13	G7	2	yes		no	no		yes		no	no
	4-7dDIPalphaGAL4_rfpRNAi_55810_FruFLP male 14	G1	2	yes		no	no		yes		yes	yes
	4-7dDIPalphaGAL4_rfpRNAi_55810_FruFLP male 15	J8	1	yes		no	no		yes		no	no
	4-7dDIPalphaGAL4_rfpRNAi_55810_FruFLP male 16	G3	2	yes		no	no		yes		no	no
	4-7dDIPalphaGAL4_rfpRNAi_55810_FruFLP male 21	H8	1	yes		no	no		yes		no	no
	4-7dDIPalphaGAL4_rfpRNAi_55810_FruFLP male 22	H6	2	yes		no	no		yes		no	no
	4-7dDIPalphaGAL4_rfpRNAi_55810_FruFLP male 23	J7	2	yes		no	no		yes		yes	no
	4-7dDIPalphaGAL4_rfpRNAi_55810_FruFLP male 25	J4	0	yes		no	no		yes		yes	no
	4-7dDIPalphaGAL4_rfpRNAi_55810_FruFLP male 26	Bp_B4	1	yes		no	no		yes		no	no
	4-7dDIPalphaGAL4_rfpRNAi_55810_FruFLP male 29	Bp_D1	1	yes		no	no		yes		no	no
	4-7dDIPalphaGAL4_rfpRNAi_55810_FruFLP male 3	H3	0	no		no	no		yes		no	no
	4-7dDIPalphaGAL4_rfpRNAi_55810_FruFLP male 31	Bp_B1	0	no		no	no		yes		yes	no
	4-7dDIPalphaGAL4_rfpRNAi_55810_FruFLP male 32	Bp_C3	2	yes		no	no		yes		no	no
	4-7dDIPalphaGAL4_rfpRNAi_55810_FruFLP male 33	Bp_A5	2	yes		no	no		yes		no	no
	4-7dDIPalphaGAL4_rfpRNAi_55810_FruFLP male 36	Bp_A1	2	yes		no	no		yes		no	no
	4-7dDIPalphaGAL4_rfpRNAi_55810_FruFLP male 37	Bp_B7	1	yes		no	no		yes		no	no
	4-7dDIPalphaGAL4_rfpRNAi_55810_FruFLP male 38	Bp_B8	2	yes		no	no		yes		yes	yes
	4-7dDIPalphaGAL4_rfpRNAi_55810_FruFLP male 39	Bp_A4	1	yes		no	no		yes		no	no
	4-7dDIPalphaGAL4_rfpRNAi_55810_FruFLP male 41	Bp_B2	1	yes		no	no		yes		yes	yes
	4-7dDIPalphaGAL4_55810_FruFLP_tubGAL80 female 12	tub_J8	2	yes		yes	no		yes		yes	yes
	4-7dDIPalphaGAL4_55810_FruFLP_tubGAL80 female 14	tub_B4	0	no		no	no		yes		yes	no
	4-7dDIPalphaGAL4_55810_FruFLP_tubGAL80 female 15	tub_H3	2	yes		no	no		yes		no	no
	4-7dDIPalphaGAL4_55810_FruFLP_tubGAL80 female 16	tub_A4	1	yes		no	no		yes		yes	no
	4-7dDIPalphaGAL4_55810_FruFLP_tubGAL80 female 19	tub_F3	0	no		no	no		yes		yes	no
	4-7dDIPalphaGAL4_55810_FruFLP_tubGAL80 female 2	tub_G5	1	yes		no	no		yes		yes	no
	4-7dDIPalphaGAL4_55810_FruFLP_tubGAL80 female 21	tub_G2	1	yes		no	no		yes		yes	no
	4-7dDIPalphaGAL4_55810_FruFLP_tubGAL80 female 23	tub_C6	1	no		no	no		yes		yes	yes
	4-7dDIPalphaGAL4_55810_FruFLP_tubGAL80 female 25	tub_E9	1	yes		no	no		yes		yes	yes
	4-7dDIPalphaGAL4_55810_FruFLP_tubGAL80 female 26	tub_J5	0	no		no	no		yes		yes	yes
	4-7dDIPalphaGAL4_55810_FruFLP_tubGAL80 female 28	tub_H6	0	yes		no	no		yes		yes	yes
	4-7dDIPalphaGAL4_55810_FruFLP_tubGAL80 female 29	tub_A5	1	yes		no	no		yes		yes	no
	4-7dDIPalphaGAL4_55810_FruFLP_tubGAL80 female 31	tub_A2	0	yes		no	no		yes		yes	yes
	4-7dDIPalphaGAL4_55810_FruFLP_tubGAL80 female 33	tub_F2	0	no		no	no		yes		yes	yes
	4-7dDIPalphaGAL4_55810_FruFLP_tubGAL80 female 34	tub_G3	2	yes		no	no		yes		yes	yes
	4-7dDIPalphaGAL4_55810_FruFLP_tubGAL80 female 4	tub_G8	1	yes		no	no		yes		yes	yes
	4-7dDIPalphaGAL4_55810_FruFLP_tubGAL80 female 6	tub_H5	2	yes		no	no		yes		yes	yes
	4-7dDIPalphaGAL4_55810_FruFLP_tubGAL80 female 7	tub_F8	2	yes		no	no		yes		yes	yes
	4-7dDIPalphaGAL4_55810_FruFLP_tubGAL80 female 8	tub_J6	1	yes		no	no		yes		yes	no
	4-7dDIPalphaGAL4_55810_FruFLP_tubGAL80 female 9	tub_D8	1	yes		no	no		yes		yes	yes
	4-7dDIPalphaGAL4_55810_FruFLP_tubGAL80 male 10	tub_E2	1	yes		no	no		yes		yes	yes
	4-7dDIPalphaGAL4_55810_FruFLP_tubGAL80 male 12	tub_F7	1	yes		no	no		yes		yes	no
	4-7dDIPalphaGAL4_55810_FruFLP_tubGAL80 male 13	tub_B9	2	yes		no	no		yes		yes	no
	4-7dDIPalphaGAL4_55810_FruFLP_tubGAL80 male 15	tub_E7	1	yes		no	no		yes		yes	yes
	4-7dDIPalphaGAL4_55810_FruFLP_tubGAL80 male 16	tub_G1	2	yes		no	no		yes		yes	no
	4-7dDIPalphaGAL4_55810_FruFLP_tubGAL80 male 2	tub_D7	1	yes		no	no		yes		yes	no
	4-7dDIPalphaGAL4_55810_FruFLP_tubGAL80 male 20	tub_C4	2	yes		no	no		yes		yes	no
	4-7dDIPalphaGAL4_55810_FruFLP_tubGAL80 male 22	tub_E4	1	yes		no	no		yes		yes	no
	4-7dDIPalphaGAL4_55810_FruFLP_tubGAL80 male 24	tub_A9	1	yes		no	no		yes		yes	no
	4-7dDIPalphaGAL4_55810_FruFLP_tubGAL80 male 27	tub_D3	1	yes		no	no		yes		yes	no
	4-7dDIPalphaGAL4_55810_FruFLP_tubGAL80 male 29	tub_J2	2	yes		no	no		yes		yes	no
	4-7dDIPalphaGAL4_55810_FruFLP_tubGAL80 male 3	tub_F9	1	yes		no	no		yes		yes	yes
	4-7dDIPalphaGAL4_55810_FruFLP_tubGAL80 male 30	tub_F1	1	yes		no	no		yes		yes	no
	4-7dDIPalphaGAL4_55810_FruFLP_tubGAL80 male 31	tub_H2	1	yes		no	no		yes		yes	no
	4-7dDIPalphaGAL4_55810_FruFLP_tubGAL80 male 32	tub_C2	1	yes		no	no		yes		yes	no
	4-7dDIPalphaGAL4_55810_FruFLP_tubGAL80 male 33	tub_B2	2	yes		no	no		yes		no	no
	4-7dDIPalphaGAL4_55810_FruFLP_tubGAL80 male 5	tub_C8	1	yes		no	no		yes		yes	no
	4-7dDIPalphaGAL4_55810_FruFLP_tubGAL80 male 7	tub_H4	2	yes		no	no		yes		no	no
	4-7dDIPalphaGAL4_55810_FruFLP_tubGAL80 male 8	tub_J3	1	yes		no	no		yes		yes	no
	4-7dDIPalphaGAL4_55810_FruFLP_tubGAL80 male 9	tub_C9	1	yes		no	no		yes		yes	yes
	4-7dDIPalphaGAL4_DIPepsilonRNAi_55810_FruFLP_tubgal80 female 11	tub_B7	2	yes		yes	no		yes		yes	no
	4-7dDIPalphaGAL4_DIPepsilonRNAi_55810_FruFLP_tubgal80 female 12	tub_E3	1	no		no	no		yes		no	no
	4-7dDIPalphaGAL4_DIPepsilonRNAi_55810_FruFLP_tubgal80 female 13	tub_B8	1	yes		yes	no		yes		yes	no
	4-7dDIPalphaGAL4_DIPepsilonRNAi_55810_FruFLP_tubgal80 female 14	tub_A1	2	yes		yes	no		yes		no	no
	4-7dDIPalphaGAL4_DIPepsilonRNAi_55810_FruFLP_tubgal80 female 20	tub_E1	1	yes		yes	no		yes		yes	no
	4-7dDIPalphaGAL4_DIPepsilonRNAi_55810_FruFLP_tubgal80 female 23	tub_J7	1	yes		yes	no		yes		yes	yes
	4-7dDIPalphaGAL4_DIPepsilonRNAi_55810_FruFLP_tubgal80 female 24	tub_F5	0	no		yes	no		yes		no	no
	4-7dDIPalphaGAL4_DIPepsilonRNAi_55810_FruFLP_tubgal80 female 25	tub_H1	1	no		yes	no		yes		yes	no
	4-7dDIPalphaGAL4_DIPepsilonRNAi_55810_FruFLP_tubgal80 female 26	tub_D4	1	yes		yes	no		yes		yes	yes
	4-7dDIPalphaGAL4_DIPepsilonRNAi_55810_FruFLP_tubgal80 female 28	tub_B6	1	no		yes	no		yes		yes	yes
	4-7dDIPalphaGAL4_DIPepsilonRNAi_55810_FruFLP_tubgal80 female 30	tub_F4	1	yes		yes	no		yes		yes	no
	4-7dDIPalphaGAL4_DIPepsilonRNAi_55810_FruFLP_tubgal80 female 32	tub_A3	1	yes		yes	no		yes		yes	no
	4-7dDIPalphaGAL4_DIPepsilonRNAi_55810_FruFLP_tubgal80 female 33	tub_G9	2	yes		yes	no		yes		yes	yes
	4-7dDIPalphaGAL4_DIPepsilonRNAi_55810_FruFLP_tubgal80 female 35	tub_B3	0	no		yes	no		yes		no	no
	4-7dDIPalphaGAL4_DIPepsilonRNAi_55810_FruFLP_tubgal80 female 37	tub_D6	1	yes		yes	no		yes		no	no
	4-7dDIPalphaGAL4_DIPepsilonRNAi_55810_FruFLP_tubgal80 female 5	tub_D2	0	no		yes	no		yes		yes	no
	4-7dDIPalphaGAL4_DIPepsilonRNAi_55810_FruFLP_tubgal80 female 6	tub_G6	1	yes		yes	no		yes		yes	yes
	4-7dDIPalphaGAL4_DIPepsilonRNAi_55810_FruFLP_tubgal80 female 7	tub_G4	1	yes		yes	no		yes		no	no
	4-7dDIPalphaGAL4_DIPepsilonRNAi_55810_FruFLP_tubgal80 female 8	tub_C3	0	no		yes	no		yes		no	no
	4-7dDIPalphaGAL4_DIPepsilonRNAi_55810_FruFLP_tubgal80 female 9	tub_C1	0	no		yes	no		yes		yes	yes
	4-7dDIPalphaGAL4_DIPepsilonRNAi_55810_FruFLP_tubgal80 male	tub_E5	1	yes		no	no		yes		yes	yes
	4-7dDIPalphaGAL4_DIPepsilonRNAi_55810_FruFLP_tubgal80 male 11	tub_A7	1	yes		no	no		yes		yes	no
	4-7dDIPalphaGAL4_DIPepsilonRNAi_55810_FruFLP_tubgal80 male 12	tub_H7	1	yes		no	no		yes		yes	yes
	4-7dDIPalphaGAL4_DIPepsilonRNAi_55810_FruFLP_tubgal80 male 16	tub_D9	2	yes		no	no		yes		yes	no
	4-7dDIPalphaGAL4_DIPepsilonRNAi_55810_FruFLP_tubgal80 male 17	tub_D5	2	yes		no	no		yes		yes	yes
	4-7dDIPalphaGAL4_DIPepsilonRNAi_55810_FruFLP_tubgal80 male 21	tub_J1	1	yes		no	no		yes		yes	no
	4-7dDIPalphaGAL4_DIPepsilonRNAi_55810_FruFLP_tubgal80 male 23	tub_H9	1	yes		no	no		yes		no	no
	4-7dDIPalphaGAL4_DIPepsilonRNAi_55810_FruFLP_tubgal80 male 25	tub_J4	1	yes		no	no		yes		yes	no
	4-7dDIPalphaGAL4_DIPepsilonRNAi_55810_FruFLP_tubgal80 male 27	tub_A8	1	yes		no	no		yes		yes	no
	4-7dDIPalphaGAL4_DIPepsilonRNAi_55810_FruFLP_tubgal80 male 28	tub_A6	1	yes		no	no		yes		yes	no
	4-7dDIPalphaGAL4_DIPepsilonRNAi_55810_FruFLP_tubgal80 male 3	tub_H8	0	no		no	no		yes		yes	no
	4-7dDIPalphaGAL4_DIPepsilonRNAi_55810_FruFLP_tubgal80 male 31	tub_E6	1	yes		no	no		yes		yes	no
	4-7dDIPalphaGAL4_DIPepsilonRNAi_55810_FruFLP_tubgal80 male 33	tub_G7	1	yes		no	no		yes		no	no
	4-7dDIPalphaGAL4_DIPepsilonRNAi_55810_FruFLP_tubgal80 male 34	tub_B5	1	yes		no	no		yes		yes	no
	4-7dDIPalphaGAL4_DIPepsilonRNAi_55810_FruFLP_tubgal80 male 35	tub_F6	2	yes		no	no		yes		yes	no
	4-7dDIPalphaGAL4_DIPepsilonRNAi_55810_FruFLP_tubgal80 male 36	tub_E8	2	yes		no	no		yes		yes	no
	4-7dDIPalphaGAL4_DIPepsilonRNAi_55810_FruFLP_tubgal80 male 37	tub_B1	1	yes		no	no		yes		yes	yes
	4-7dDIPalphaGAL4_DIPepsilonRNAi_55810_FruFLP_tubgal80 male 4	tub_C5	1	yes		no	no		yes		yes	no
	4-7dDIPalphaGAL4_DIPepsilonRNAi_55810_FruFLP_tubgal80 male 5	tub_D1	2	yes		no	no		yes		yes	no
	4-7dDIPalphaGAL4_DIPepsilonRNAi_55810_FruFLP_tubgal80 male 6	tub_C7	2	yes		no	no		yes		yes	no

## Sheet: UAS DIP-α screen
Genotype		Temperature raised (°C)	Timepoint assayed	Phenotype?	Notes
Gal4 Driver	Perturbation
Dpr5	UAS DIP-α	25	4-7 days
Dpr5	w;cs	25	4-7 days	Control
Dpr10	UAS DIP-α	25	4-7 days
Dpr10	w;cs	25	4-7 days	Control
Dpr11	UAS DIP-α	25	4-7 days
Dpr11	w;cs	25	4-7 days	Control
DIP-β	UAS DIP-α	25	4-7 days
DIP-β	w;cs	25	4-7 days	Control
DIP-δ	UAS DIP-α	25	4-7 days
DIP-δ	w;cs	25	4-7 days	Control
DIP-η	UAS DIP-α	25	4-7 days
DIP-η	w;cs	25	4-7 days	Control
DIP-γ	UAS DIP-α	25	4-7 days
DIP-γ	w;cs	25	4-7 days	Control
---------------------------------------------------------------------------------------
DIP-β	UAS DIP-α	25	4-7 days
DIP-β	w;cs	25	4-7 days	Control
DIP-β	UAS DIP-α; tubgal80	25	4-7 days
DIP-β	tubgal80	25	4-7 days	Control
DIP-δ	UAS DIP-α	25	4-7 days
DIP-δ	w;cs	25	4-7 days	Control
DIP-δ	UAS DIP-α; tubgal80	25	4-7 days
DIP-δ	tubgal80	25	4-7 days	Control
DIP-η	UAS DIP-α	25	4-7 days
DIP-η	w;cs	25	4-7 days	Control
DIP-η	UAS DIP-α; tubgal80	25	4-7 days
DIP-η	tubgal80	25	4-7 days	Control
